# Supplementary material for: Haemolymph removal by Varroa mite destabilizes the dynamical interaction between immune effectors and virus in bees, as predicted by Volterra's model
Source: Proc Biol Sci. 2019 Apr 17;286(1901):20190331. doi: 10.1098/rspb.2019.0331 (PMC6501932; doi:10.1098/rspb.2019.0331)
Supplement: Supplementary Data 2 [file rspb20190331supp3.xlsx]

## Sheet: figure 1F
																										P-values	FDR														P-values	FDR
					Varroa						Varroa+DWV				Varroa+DWV										BH correction	14	0.1			Varroa										BH correction	14	0.1
GO term / Pathway	n	expected			diff expr	observed	enriched				diff expr	observed	enriched										test chi	sign (<0.01)	(i/m)/Q	P<(i/m)/Q	significance											test chi	sign (<0.01)	(i/m)/Q	P<(i/m)/Q	significance
Toll_pathwa	36	0.222222			5	0.625	E				1	0.125			36	126	162	1.77778	6.22222	1	7	8	0.508332		0.05					36	126	162	1.77778	6.22222	5	3	8	0.00613939	sign	0.00714286	0.00613939	sign
TEP - Thioe	3	0.0185185			0	0					0	0			3	159	162	0.148148	7.85185	0	8	8	0.697635		0.0714286					3	159	162	0.148148	7.85185	0	8	8	0.697635		0.0714286
serine prot	42	0.259259			0	0					0	0			42	120	162	2.07407	5.92593	0	8	8	0.0942643		0.0142857					42	120	162	2.07407	5.92593	0	8	8	0.0942643		0.0214286
Scav. Recep	12	0.0740741			0	0					0	0			12	150	162	0.592593	7.40741	0	8	8	0.423711		0.0357143					12	150	162	0.592593	7.40741	0	8	8	0.423711		0.0428571
PPO - melan	2	0.0123457			0	0					0	0			2	160	162	0.0987654	7.90123	0	8	8	0.75183		0.0785714					2	160	162	0.0987654	7.90123	0	8	8	0.75183		0.0785714
Lysozyme	1	0.00617284			0	0					0	0			1	161	162	0.0493827	7.95062	0	8	8	0.823605		0.0857143					1	161	162	0.0493827	7.95062	0	8	8	0.823605		0.0857143
JNK cascade	14	0.0864198			0	0					3	0.375	E		14	148	162	0.691358	7.30864	3	5	8	0.00367366	sign	0.00714286	0.00367366	sign			14	148	162	0.691358	7.30864	0	8	8	0.384345		0.0357143
JAK-STAT ca	8	0.0493827			0	0					1	0.125	E		8	154	162	0.395062	7.60494	1	7	8	0.323577		0.0285714					8	154	162	0.395062	7.60494	0	8	8	0.519149		0.0571429
Imd-Pathway	10	0.0617284			1	0.125	E				0	0			10	152	162	0.493827	7.50617	0	8	8	0.46816		0.0428571					10	152	162	0.493827	7.50617	1	7	8	0.457111		0.05
IG Superfam	17	0.104938			0	0					2	0.25	E		17	145	162	0.839506	7.16049	2	6	8	0.180647		0.0214286					17	145	162	0.839506	7.16049	0	8	8	0.33281		0.0285714
C-lectin do	11	0.0679012			1	0.125	E				1	0.125			11	151	162	0.54321	7.45679	1	7	8	0.520905		0.0571429					11	151	162	0.54321	7.45679	1	7	8	0.520905		0.0642857
Antimicrobi	4	0.0246914			1	0.125	E				0	0			4	158	162	0.197531	7.80247	0	8	8	0.652685		0.0642857					4	158	162	0.197531	7.80247	1	7	8	0.0675094		0.0142857
Vago orthol	1	0.00617284			0	0					0	0			1	161	162	0.0493827	7.95062	0	8	8	0.823605		0.0857143					1	161	162	0.0493827	7.95062	0	8	8	0.823605		0.0857143
RNAi	1	0.00617284			0	0					0	0			1	161	162	0.0493827	7.95062	0	8	8	0.823605		0.0857143					1	161	162	0.0493827	7.95062	0	8	8	0.823605		0.0857143
tot imm	162				8						8									8															8
	Varroa	Varroa+DWV	expected
Toll pathway	0.625	0.125	0.222222
TEP - Thioester-containing protein	0	0	0.0185185
serine proteases	0	0	0.259259
Scav. Receptor A	0	0	0.0740741
PPO - melanization	0	0	0.0123457
Lysozyme	0	0	0.00617284
JNK cascade	0	0.375	0.0864198
JAK-STAT cascade	0	0.125	0.0493827
Imd-Pathway	0.125	0	0.0617284
IG Superfamily Genes	0	0.25	0.104938
C-lectin domain	0.125	0.125	0.0679012
Antimicrobial peptides	0.125	0	0.0246914
Vago orthologue	0	0	0.00617284
RNAi	0	0	0.00617284

## Sheet: diff expr Varroa
Apis mellifera putative immune related genes extended list
adapted from: Ryabov EV, Wood GR, Fannon JM, Moore JD, Bull JC, Chandler D, Mead A, Burroughs N, Evans DJ. (2014) A virulent strain of deformed wing virus (DWV) of honeybees (Apis mellifera) prevails after Varroa destructor-mediated, or in vitro, transmission. PLoS Pathog. 2014 Jun 26;10(6):e1004230. doi: 10.1371/journal.ppat.1004230.
note that double entries were excluded from the original list for the sake of the statistical analysis of enriched terms
The details of the statistical analysis are reported in columns S to BM; if you are interested, use the command "format > unhide"
If you want to change the parameters used for filtering data or the significance level go to the spreadsheet "reference parameters"
To see only the significantly differentially expressed genes, use the "filter" in column BN							sample code
							2	3	4	5	6	7	8	9	10	11				ranks											correction for ties											corrected ranks
							no mite+low virus					mite+low virus						filtering		group1					group2						group1					group2						group1					group2
Apis mellifera OGS1 (2008 version)	Apis mellifera OGS3.1 BEEBASE	FBgn ortholog	Gene Product	GO term / Pathway	Go term short name		l26	l28	l30	l34	l35	lv_13 (LI)	lv_26 (LI)	lv_27 (LI)	lv_34 (LI)	lv_35 (LI)				1	2	3	4	5	1	2	3	4	5		1	2	3	4	5	1	2	3	4	5		1	2	3	4	5	1	2	3
GB10023	GB52350	FBgn0036448	myopic	Toll_pathway_Toll signaling pathway ; GO:0008063 and children	Toll_pathwa		5.92666	6.30911	5.65381	6.26197	6.35723	7.01984	6.12548	6.57309	5.95371	6.16407		OK		2	7	1	6	8	10	4	9	3	5		0	0	0	0	0	0	0	0	0	0		2	7	1	6	8	10	4	9
GB10539	GB54845	FBgn0026318	TNF-receptor-associated factor 6	Toll_pathway_Toll signaling pathway ; GO:0008063 and children	Toll_pathwa		6.55663	6.851	6.9288	7.28839	7.39108	7.79188	7.03832	7.13229	6.65915	7.15568		OK		1	3	4	8	9	10	5	6	2	7		0	0	0	0	0	0	0	0	0	0		1	3	4	8	9	10	5	6
GB10655	GB44055	FBgn0000250	cactus	Toll_pathway_Toll signaling pathway ; GO:0008063 and children	Toll_pathwa		6.56899	6.57686	6.53367	6.7672	6.38881	7.35692	6.53724	6.89143	6.29209	6.63665		OK		5	6	3	8	2	10	4	9	1	7		0	0	0	0	0	0	0	0	0	0		5	6	3	8	2	10	4	9
GB11090	GB47167	FBgn0026318	TNF-receptor-associated factor 6	Toll_pathway_Toll signaling pathway ; GO:0008063 and children	Toll_pathwa		#N/A	#N/A	#N/A	#N/A	#N/A	#N/A	#N/A	#N/A	#N/A	#N/A		FALSE		FALSE	FALSE	FALSE	FALSE	FALSE	FALSE	FALSE	FALSE	FALSE	FALSE
GB11883	GB53302	FBgn0000250	cactus	Toll_pathway_Toll signaling pathway ; GO:0008063 and children	Toll_pathwa		7.68329	7.77921	7.26027	7.37956	7.51009	8.16272	7.99455	7.78215	7.77056	7.69946		OK		4	7	1	2	3	10	9	8	6	5		0	0	0	0	0	0	0	0	0	0		4	7	1	2	3	10	9	8
GB12279	GB55279	FBgn0028990	Serpin 27A	Toll_pathway_Toll signaling pathway ; GO:0008063 and children	Toll_pathwa		8.27003	8.11817	7.51111	7.55182	7.77652	8.33581	8.12706	7.94297	8.10597	7.94385		OK		9	7	1	2	3	10	8	4	6	5		0	0	0	0	0	0	0	0	0	0		9	7	1	2	3	10	8	4
GB12344	GB51498	FBgn0033402	Myd88	Toll_pathway_Toll signaling pathway ; GO:0008063 and children	Toll_pathwa		7.87876	7.94526	7.72463	8.05658	8.02641	9.01417	8.27149	8.71896	8.20586	8.03107		OK		2	3	1	6	4	10	8	9	7	5		0	0	0	0	0	0	0	0	0	0		2	3	1	6	4	10	8	9
GB13429	GB47680	FBgn0022787	Helicase 89B	Toll_pathway_Toll signaling pathway ; GO:0008063 and children	Toll_pathwa		9.2021	9.17248	9.05345	8.81228	9.03787	8.21095	8.83599	8.40294	9.11025	8.78226		OK		10	9	7	4	6	1	5	2	8	3		0	0	0	0	0	0	0	0	0	0		10	9	7	4	6	1	5	2
GB13503	GB52103	FBgn0003495	spatzle	Toll_pathway_Toll signaling pathway ; GO:0008063 and children	Toll_pathwa		2.82187	3.29426	3.40289	3.47063	3.54253	3.30825	2.82187	3.56114	3.27554	2.82187		OK		1	5	7	8	9	6	1	10	4	1		1	0	0	0	0	0	1	0	0	1		2	5	7	8	9	6	2	10
GB13520	GB44185	FBgn0000250	cactus	Toll_pathway_Toll signaling pathway ; GO:0008063 and children	Toll_pathwa		9.42467	9.19148	8.4022	9.60401	9.13353	9.31364	9.40445	8.7276	9.2753	9.75151		OK		8	4	1	9	3	6	7	2	5	10		0	0	0	0	0	0	0	0	0	0		8	4	1	9	3	6	7	2
GB13742	GB40654	FBgn0260632	dorsal	Toll_pathway_Toll signaling pathway ; GO:0008063 and children	Toll_pathwa		10.8299	10.8827	11.1751	10.4675	10.7832	10.306	10.9563	10.8615	10.986	10.6796		OK		5	7	10	2	4	1	8	6	9	3		0	0	0	0	0	0	0	0	0	0		5	7	10	2	4	1	8	6
GB13922	GB41067	FBgn0010269	Downstream of raf1	Toll_pathway_Toll signaling pathway ; GO:0008063 and children	Toll_pathwa		6.54416	6.40407	5.72016	6.62497	6.78211	7.19825	6.27127	6.26197	6.1974	6.06739		OK		7	6	1	8	9	10	5	4	3	2		0	0	0	0	0	0	0	0	0	0		7	6	1	8	9	10	5	4
GB13935	GB49466	FBgn0261988	G protein-coupled receptor kinase 2	Toll_pathway_Toll signaling pathway ; GO:0008063 and children	Toll_pathwa		5.17427	5.4717	5.35102	5.17069	5.35183	5.97351	5.80068	5.45941	5.79547	5.90866		OK		2	6	3	1	4	10	8	5	7	9		0	0	0	0	0	0	0	0	0	0		2	6	3	1	4	10	8	5
GB14810	GB53713	FBgn0022787	Helicase 89B	Toll_pathway_Toll signaling pathway ; GO:0008063 and children	Toll_pathwa		9.49075	9.50725	9.22302	9.07018	9.1969	9.15841	9.17686	9.07935	9.54683	8.82923		OK		8	9	7	2	6	4	5	3	10	1		0	0	0	0	0	0	0	0	0	0		8	9	7	2	6	4	5	3
GB15273	GB48707	FBgn0024222	immune response deficient 5	Toll_pathway_Toll signaling pathway ; GO:0008063 and children	Toll_pathwa		#N/A	#N/A	#N/A	#N/A	#N/A	#N/A	#N/A	#N/A	#N/A	#N/A		FALSE		FALSE	FALSE	FALSE	FALSE	FALSE	FALSE	FALSE	FALSE	FALSE	FALSE
GB15684	GB51427	FBgn0003882	tube	Toll_pathway_Toll signaling pathway ; GO:0008063 and children	Toll_pathwa		9.81867	9.85582	9.85035	9.62807	9.61164	9.81772	10.0003	9.97428	10.0703	9.70323		OK		5	7	6	2	1	4	9	8	10	3		0	0	0	0	0	0	0	0	0	0		5	7	6	2	1	4	9	8
GB15688	GB52631	FBgn0003495	spatzle	Toll_pathway_Toll signaling pathway ; GO:0008063 and children	Toll_pathwa		7.94632	8.13005	9.11525	8.56601	8.57545	8.9705	8.30172	9.81014	7.84772	7.93483		OK		3	4	9	6	7	8	5	10	1	2		0	0	0	0	0	0	0	0	0	0		3	4	9	6	7	8	5	10
GB15714	GB43157	FBgn0036448	myopic	Toll_pathway_Toll signaling pathway ; GO:0008063 and children	Toll_pathwa		9.90724	10.0061	9.53253	9.36085	9.59662	9.30256	9.61758	9.34517	9.54275	9.3637		OK		9	10	5	3	7	1	8	2	6	4		0	0	0	0	0	0	0	0	0	0		9	10	5	3	7	1	8	2
GB16281	GB45171	FBgn0010602	lesswright	Toll_pathway_Toll signaling pathway ; GO:0008063 and children	Toll_pathwa		9.74341	9.74058	9.7929	9.84205	9.71576	10.2232	9.75629	9.84132	9.75891	9.60722		OK		4	3	7	9	2	10	5	8	6	1		0	0	0	0	0	0	0	0	0	0		4	3	7	9	2	10	5	8
GB16397	GB49344	FBgn0010441	pelle	Toll_pathway_Toll signaling pathway ; GO:0008063 and children	Toll_pathwa		8.37878	8.52417	8.23407	8.29912	8.23066	8.79448	8.54218	8.39754	8.52597	8.74407		OK		4	6	2	3	1	10	8	5	7	9		0	0	0	0	0	0	0	0	0	0		4	6	2	3	1	10	8	5
GB16970	GB44935	FBgn0025574	Pellino	Toll_pathway_Toll signaling pathway ; GO:0008063 and children	Toll_pathwa		9.23332	9.23609	9.55945	9.55464	9.34413	8.59092	9.07995	9.17087	9.12673	9.31764		OK		5	6	10	9	8	1	2	4	3	7		0	0	0	0	0	0	0	0	0	0		5	6	10	9	8	1	2	4
GB17879	GB51741	FBgn0030310	Peptidoglycan recognition protein SA	Toll_pathway_Toll signaling pathway ; GO:0008063 and children	Toll_pathwa		7.08925	6.93485	7.31407	7.21246	6.7582	8.2991	7.65722	7.92053	7.05429	7.32424		OK		4	2	6	5	1	10	8	9	3	7		0	0	0	0	0	0	0	0	0	0		4	2	6	5	1	10	8	9
GB18520	GB50418	FBgn0262473	Toll	Toll_pathway_Toll signaling pathway ; GO:0008063 and children	Toll_pathwa		7.64893	7.74357	7.06066	7.44132	7.37548	8.26524	8.04456	7.46803	8.00261	7.62288		OK		6	7	1	3	2	10	9	4	8	5		0	0	0	0	0	0	0	0	0	0		6	7	1	3	2	10	9	4
GB19537	GB44031	FBgn0260632	dorsal	Toll_pathway_Toll signaling pathway ; GO:0008063 and children	Toll_pathwa		10.2971	10.2458	9.74288	9.75611	9.65258	10.0996	9.97709	9.65692	9.95201	9.95242		OK		10	9	3	4	1	8	7	2	5	6		0	0	0	0	0	0	0	0	0	0		10	9	3	4	1	8	7	2
GB10640	GB48399	FBgn0029114	Toll / Tollo	Toll_pathway_Toll signaling pathway ;	Toll_pathwa		3.98284	3.48702	3.96189	4.29179	3.94466	3.78146	2.82187	3.56114	4.07096	4.19463		OK		7	2	6	10	5	4	1	3	8	9		0	0	0	0	0	0	0	0	0	0		7	2	6	10	5	4	1	3
GB13677	GB46708	FBgn0031114	cactin	Toll_pathway_Toll signaling pathway ;	Toll_pathwa		7.82337	7.81398	7.60898	7.81226	7.55921	8.14214	8.0175	7.97236	7.874	7.86532		OK		5	4	2	3	1	10	9	8	7	6		0	0	0	0	0	0	0	0	0	0		5	4	2	3	1	10	9	8
GB14044	GB55007	FBgn0030051	persephone-PSH Serine Protease Immune Response Integrator	Toll_pathway_Toll signaling pathway ;	Toll_pathwa		4.42467	4.98578	5.06936	4.70239	4.83822	4.54594	4.75491	4.97874	4.8757	5.05923		OK		1	8	10	3	5	2	4	7	6	9		0	0	0	0	0	0	0	0	0	0		1	8	10	3	5	2	4	7
GB14609	GB48662	FBgn0004364	Toll	Toll_pathway_Toll signaling pathway ;	Toll_pathwa		#N/A	#N/A	#N/A	#N/A	#N/A	#N/A	#N/A	#N/A	#N/A	#N/A		FALSE		FALSE	FALSE	FALSE	FALSE	FALSE	FALSE	FALSE	FALSE	FALSE	FALSE
GB14720	GB42451	FBgn0086657	Mik2	Toll_pathway_Toll signaling pathway ;	Toll_pathwa		6.94541	6.88888	6.84344	6.90537	6.7461	7.19024	6.97392	6.99555	6.85716	6.86345		OK		7	5	2	6	1	10	8	9	3	4		0	0	0	0	0	0	0	0	0	0		7	5	2	6	1	10	8	9
GB15177	GB43456	FBgn0034476	Toll	Toll_pathway_Toll signaling pathway ;	Toll_pathwa		5.64921	4.87089	5.21757	4.93963	6.41971	3.78146	4.75491	4.0086	5.67906	5.5242		OK		8	4	6	5	10	1	3	2	9	7		0	0	0	0	0	0	0	0	0	0		8	4	6	5	10	1	3	2
GB15606	GB43914	FBgn0024846	0	Toll_pathway_Toll signaling pathway ;	Toll_pathwa		9.13755	9.25608	9.29421	9.2771	9.17459	9.35713	9.01988	9.43888	9.13941	9.06642		OK		3	6	8	7	5	9	1	10	4	2		0	0	0	0	0	0	0	0	0	0		3	6	8	7	5	9	1	10
GB16299	GB48426	FBgn0029114	Toll	Toll_pathway_Toll signaling pathway ;	Toll_pathwa		7.70575	7.5449	7.83168	7.37956	7.92839	6.96451	7.58527	7.17722	7.6337	7.68339		OK		8	4	9	3	10	1	5	2	6	7		0	0	0	0	0	0	0	0	0	0		8	4	9	3	10	1	5	2
GB16472	GB48820	FBgn0028985	NEC LIKE	Toll_pathway_Toll signaling pathway ;	Toll_pathwa		8.81527	8.94505	9.33633	9.31547	8.88408	10.0942	9.17073	9.68269	8.74809	9.26468		OK		2	4	8	7	3	10	5	9	1	6		0	0	0	0	0	0	0	0	0	0		2	4	8	7	3	10	5	9
GB17012	GB46970	not found	NEC LIKE	Toll_pathway_Toll signaling pathway ;	Toll_pathwa		7.25089	7.50286	7.39615	7.07103	7.03171	8.05234	7.65136	7.51875	7.22758	7.29631		OK		4	7	6	2	1	10	9	8	3	5		0	0	0	0	0	0	0	0	0	0		4	7	6	2	1	10	9	8
GB17781	GB48396	FBgn0036494	Toll	Toll_pathway_Toll signaling pathway ;	Toll_pathwa		#N/A	#N/A	#N/A	#N/A	#N/A	#N/A	#N/A	#N/A	#N/A	#N/A		FALSE		FALSE	FALSE	FALSE	FALSE	FALSE	FALSE	FALSE	FALSE	FALSE	FALSE
GB17927	GB49441	FBgn0003450	Toll-Pathway_persephone-Serine protease--Extracellular-cSP10	Toll_pathway_Toll signaling pathway ;	Toll_pathwa		6.89732	7.22844	8.08136	7.72562	7.92304	7.90862	7.76425	7.95037	7.57616	7.71008		OK		1	2	10	5	8	7	6	9	3	4		0	0	0	0	0	0	0	0	0	0		1	2	10	5	8	7	6	9
GB17936	GB55933	FBgn0039532		Toll_pathway_Toll signaling pathway ;	Toll_pathwa		5.96486	5.74822	5.21757	5.92063	5.9535	6.04702	6.00068	5.78082	5.31001	5.81206		OK		8	3	1	6	7	10	9	4	2	5		0	0	0	0	0	0	0	0	0	0		8	3	1	6	7	10	9	4
GB17961	GB41158	not found	Tollip	Toll_pathway_Toll signaling pathway ;	Toll_pathwa		8.46353	8.55384	8.417	8.59343	8.49488	9.01643	8.36748	8.55389	8.37171	8.46917		OK		4	7	3	9	6	10	1	8	2	5		0	0	0	0	0	0	0	0	0	0		4	7	3	9	6	10	1	8
GB17975	GB40699	FBgn0029114	Tollo	Toll_pathway_Toll signaling pathway ;	Toll_pathwa		#N/A	#N/A	#N/A	#N/A	#N/A	#N/A	#N/A	#N/A	#N/A	#N/A		FALSE		FALSE	FALSE	FALSE	FALSE	FALSE	FALSE	FALSE	FALSE	FALSE	FALSE
GB18032	GB42472	not found	dorsal	Toll_pathway_Toll signaling pathway ;	Toll_pathwa		4.64544	4.74469	5.51074	5.07657	5.31862	4.54594	5.15466	5.79759	4.33027	5.09351		OK		3	4	9	5	8	2	7	10	1	6		0	0	0	0	0	0	0	0	0	0		3	4	9	5	8	2	7	10
GB19066	GB44032	not found	dorsal	Toll_pathway_Toll signaling pathway ;	Toll_pathwa		#N/A	#N/A	#N/A	#N/A	#N/A	#N/A	#N/A	#N/A	#N/A	#N/A		FALSE		FALSE	FALSE	FALSE	FALSE	FALSE	FALSE	FALSE	FALSE	FALSE	FALSE
GB19582	GB54611	FBgn0028984	NEC-like	Toll_pathway_Toll signaling pathway ;	Toll_pathwa		10.7839	10.6905	11.1866	10.9481	10.9652	11.3985	11.5434	11.3734	11.7406	12.0401		OK		2	1	5	3	4	7	8	6	9	10		0	0	0	0	0	0	0	0	0	0		2	1	5	3	4	7	8	6
GB11563	GB45417	FBgn0041182	TEPB	TEP - Thioester-containing protein	TEP - Thioe		10.2654	10.3089	10.2794	9.8523	10.0906	10.0059	10.0501	9.94587	10.0251	9.90821		OK		8	10	9	1	7	4	6	3	5	2		0	0	0	0	0	0	0	0	0	0		8	10	9	1	7	4	6	3
GB12605	GB42455	FBgn0041182	TEP7	TEP - Thioester-containing protein	TEP - Thioe		11.2862	11.2176	10.6383	10.1046	11.1719	9.46872	10.8764	10.17	11.3002	10.5003		OK		9	8	5	2	7	1	6	3	10	4		0	0	0	0	0	0	0	0	0	0		9	8	5	2	7	1	6	3
GB18789	GB48204	FBgn0020240	TEPA	TEP - Thioester-containing protein	TEP - Thioe		7.02809	7.18349	6.75267	7.34119	7.26978	7.37822	7.1998	6.82835	6.86593	7.28924		OK		4	5	1	9	7	10	6	2	3	8		0	0	0	0	0	0	0	0	0	0		4	5	1	9	7	10	6	2
GB10222	GB41097	not found	SP18	serine proteases	serine prot		#N/A	#N/A	#N/A	#N/A	#N/A	#N/A	#N/A	#N/A	#N/A	#N/A		FALSE		FALSE	FALSE	FALSE	FALSE	FALSE	FALSE	FALSE	FALSE	FALSE	FALSE
GB10646	GB41409	FBgn0036436	SP4	serine proteases	serine prot		#N/A	#N/A	#N/A	#N/A	#N/A	#N/A	#N/A	#N/A	#N/A	#N/A		FALSE		FALSE	FALSE	FALSE	FALSE	FALSE	FALSE	FALSE	FALSE	FALSE	FALSE
GB10758	GB44146	FBgn0034709	0	serine proteases	serine prot		10.5097	10.2558	12.8106	12.3189	12.287	10.9328	10.7636	12.0757	10.277	10.6579		OK		3	1	10	9	8	6	5	7	2	4		0	0	0	0	0	0	0	0	0	0		3	1	10	9	8	6	5	7
GB10943	GB49946	FBgn0011653	cSPH41	serine proteases	serine prot		5.41839	5.25058	4.90237	6.00578	5.64587	5.79253	5.61712	5.37148	5.412	5.57257		OK		5	2	1	10	8	9	7	3	4	6		0	0	0	0	0	0	0	0	0	0		5	2	1	10	8	9	7	3
GB11297	GB47402	not found	SP31	serine proteases	serine prot		#N/A	#N/A	#N/A	#N/A	#N/A	#N/A	#N/A	#N/A	#N/A	#N/A		FALSE		FALSE	FALSE	FALSE	FALSE	FALSE	FALSE	FALSE	FALSE	FALSE	FALSE
GB11298	GB52598	FBgn0032213	cSPH42	serine proteases	serine prot		#N/A	#N/A	#N/A	#N/A	#N/A	#N/A	#N/A	#N/A	#N/A	#N/A		FALSE		FALSE	FALSE	FALSE	FALSE	FALSE	FALSE	FALSE	FALSE	FALSE	FALSE
GB11511	GB40138	not found	SP32	serine proteases	serine prot		#N/A	#N/A	#N/A	#N/A	#N/A	#N/A	#N/A	#N/A	#N/A	#N/A		FALSE		FALSE	FALSE	FALSE	FALSE	FALSE	FALSE	FALSE	FALSE	FALSE	FALSE
GB11552	GB48510	not found	SP34	serine proteases	serine prot		2.82187	2.82187	4.71045	3.73194	3.94466	3.50654	2.82187	3.56114	2.82187	2.82187		OK		1	1	10	8	9	6	1	7	1	1		2	2	0	0	0	0	2	0	2	2		3	3	10	8	9	6	3	7
GB11588	GB50026	not found	SP27	serine proteases	serine prot		8.90284	8.4535	9.21175	8.5324	8.49488	4.36766	8.45748	7.61512	9.88367	10.9984		OK		7	3	8	6	5	1	4	2	9	10		0	0	0	0	0	0	0	0	0	0		7	3	8	6	5	1	4	2
GB11698	GB49552	not found	cSP3	serine proteases	serine prot		7.10626	6.95284	8.48414	7.97131	7.67196	6.88725	6.76131	8.28203	6.45277	6.80508		OK		6	5	10	8	7	4	2	9	1	3		0	0	0	0	0	0	0	0	0	0		6	5	10	8	7	4	2	9
GB12253	GB50586	FBgn0003319	SP16	serine proteases	serine prot		8.78924	8.52716	8.61398	8.2517	8.97469	7.46704	7.80176	7.66099	8.72423	8.39222		OK		9	6	7	4	10	1	3	2	8	5		0	0	0	0	0	0	0	0	0	0		9	6	7	4	10	1	3	2
GB12300	GB41399	FBgn0042098	SP5	serine proteases	serine prot		4.22632	4.32651	4.08877	4.16112	4.04604	3.78146	3.99103	3.93565	3.71846	4.60614		OK		8	9	6	7	5	2	4	3	1	10		0	0	0	0	0	0	0	0	0	0		8	9	6	7	5	2	4	3
GB12379	GB54517	not found	SP48	serine proteases	serine prot		3.65356	3.95483	2.82187	3.28253	3.33407	3.30825	3.65958	3.42764	2.82187	3.63391		OK		8	10	1	3	5	4	9	6	1	7		0	0	0.5	0	0	0	0	0	0.5	0		8	10	1.5	3	5	4	9	6
GB13019	GB54775	FBgn0030027	SPH56	serine proteases	serine prot		9.87172	9.78253	9.98387	10.0283	10.4579	8.5257	9.61758	8.74685	10.1323	9.77316		OK		6	5	7	8	10	1	3	2	9	4		0	0	0	0	0	0	0	0	0	0		6	5	7	8	10	1	3	2
GB13263	GB52185	not found	SP40	serine proteases	serine prot		5.78414	5.7058	6.76821	5.90297	5.99536	4.15604	5.90424	6.1497	5.69915	6.17956		OK		4	3	10	5	7	1	6	8	2	9		0	0	0	0	0	0	0	0	0	0		4	3	10	5	7	1	6	8
GB13397	GB41410	not found	SPH51	serine proteases	serine prot		5.69565	5.4717	5.26354	5.31418	5.59187	3.89004	5.66533	5.00887	5.28327	5.15954		OK		10	7	4	6	8	1	9	2	5	3		0	0	0	0	0	0	0	0	0	0		10	7	4	6	8	1	9	2
GB13489	GB44120	FBgn0050375	SP28	serine proteases	serine prot		4.15136	3.75456	6.45891	5.36756	5.93209	4.07505	4.65744	5.03831	4.98157	4.5555		OK		3	1	10	8	9	2	5	7	6	4		0	0	0	0	0	0	0	0	0	0		3	1	10	8	9	2	5	7
GB13791	GB48079	FBgn0015316	SP22	serine proteases	serine prot		2.82187	3.29426	4.56389	3.47063	3.54253	2.82187	2.82187	5.6009	3.82045	2.82187		OK		1	5	9	6	7	1	1	10	8	1		1.5	0	0	0	0	1.5	1.5	0	0	1.5		2.5	5	9	6	7	2.5	2.5	10
GB14001	GB53354	FBgn0032402	cSPH50	serine proteases	serine prot		4.36235	4.50093	4.71045	4.16112	3.83097	3.89004	4.43549	4.25676	4.33027	4.32807		OK		7	9	10	3	1	2	8	4	6	5		0	0	0	0	0	0	0	0	0	0		7	9	10	3	1	2	8	4
GB14077	GB54762	FBgn0033362	cSP6	serine proteases	serine prot		8.01983	8.00666	6.43959	6.61425	6.30849	6.78441	7.73685	4.94791	8.41111	8.45032		OK		8	7	3	4	2	5	6	1	9	10		0	0	0	0	0	0	0	0	0	0		8	7	3	4	2	5	6	1
GB14233	GB51631	not found	SP24	serine proteases	serine prot		5.06992	5.41969	9.56167	6.91412	8.04622	4.15604	4.88829	11.6163	4.5878	5.09351		OK		4	6	9	7	8	1	3	10	2	5		0	0	0	0	0	0	0	0	0	0		4	6	9	7	8	1	3	10
GB14247	GB45700	FBgn0000533	cSP2	serine proteases	serine prot		8.91251	8.88795	10.1362	9.17008	9.21232	10.2124	9.37811	10.1282	9.15555	9.84708		OK		2	1	9	4	5	10	6	8	3	7		0	0	0	0	0	0	0	0	0	0		2	1	9	4	5	10	6	8
GB14309	GB50650	not found	cSP33	serine proteases	serine prot		5.36136	4.94861	5.75218	4.93963	5.4159	4.30153	5.59237	3.6725	5.31001	5.34006		OK		7	4	10	3	8	2	9	1	5	6		0	0	0	0	0	0	0	0	0	0		7	4	10	3	8	2	9	1
GB14366	GB52597	not found	cSPH39	serine proteases	serine prot		10.5435	10.5606	11.3922	10.8459	10.6809	11.0384	10.352	10.9591	10.5851	10.8024		OK		2	3	10	7	5	9	1	8	4	6		0	0	0	0	0	0	0	0	0	0		2	3	10	7	5	9	1	8
GB14603	GB40137	FBgn0026250	SP17	serine proteases	serine prot		6.80649	6.93485	6.40015	7.26124	6.37311	4.07505	6.44493	6.26197	6.69904	7.09208		OK		7	8	4	10	3	1	5	2	6	9		0	0	0	0	0	0	0	0	0	0		7	8	4	10	3	1	5	2
GB14644	GB41407	not found	SP29	serine proteases	serine prot		#N/A	#N/A	#N/A	#N/A	#N/A	#N/A	#N/A	#N/A	#N/A	#N/A		FALSE		FALSE	FALSE	FALSE	FALSE	FALSE	FALSE	FALSE	FALSE	FALSE	FALSE
GB14654	GB41408	FBgn0039272	SP11	serine proteases	serine prot		4.83245	4.38763	4.84156	4.65811	4.7889	4.74875	4.80094	4.67022	5.07949	4.95065		OK		7	1	8	2	5	4	6	3	10	9		0	0	0	0	0	0	0	0	0	0		7	1	8	2	5	4	6	3
GB14774	GB48081	not found	SP47	serine proteases	serine prot		3.65356	3.86033	3.63819	2.82187	3.83097	3.30825	3.65958	3.6725	4.14197	3.48776		OK		5	9	4	1	8	2	6	7	10	3		0	0	0	0	0	0	0	0	0	0		5	9	4	1	8	2	6	7
GB15254	GB50290	not found	cSPH55	serine proteases	serine prot		5.33192	5.4717	6.55176	6.26197	5.81987	6.16711	6.00068	5.43795	5.59566	5.90866		OK		1	3	10	9	5	8	7	2	4	6		0	0	0	0	0	0	0	0	0	0		1	3	10	9	5	8	7	2
GB15317	GB52191	FBgn0051217	SP49	serine proteases	serine prot		7.48977	7.50286	8.03092	7.70564	7.42934	7.7047	7.75881	7.71851	7.65407	7.42439		OK		3	4	10	7	2	6	9	8	5	1		0	0	0	0	0	0	0	0	0	0		3	4	10	7	2	6	9	8
GB15453	GB47933	not found	SP44	serine proteases	serine prot		6.41312	6.28077	7.3454	6.40604	6.25803	4.48946	6.75035	6.68429	6.83944	6.69145		OK		5	3	10	4	2	1	8	6	9	7		0	0	0	0	0	0	0	0	0	0		5	3	10	4	2	1	8	6
GB15640	GB50164	not found	SP13	serine proteases	serine prot		8.91733	8.98699	8.72914	8.99404	8.87303	8.9517	8.79144	8.88454	8.62722	8.76711		OK		7	9	2	10	5	8	4	6	1	3		0	0	0	0	0	0	0	0	0	0		7	9	2	10	5	8	4	6
GB15702	GB48471	not found	SPH53	serine proteases	serine prot		#N/A	#N/A	#N/A	#N/A	#N/A	#N/A	#N/A	#N/A	#N/A	#N/A		FALSE		FALSE	FALSE	FALSE	FALSE	FALSE	FALSE	FALSE	FALSE	FALSE	FALSE
GB15980	GB42804	not found	SPH54	serine proteases	serine prot		10.4791	10.3219	9.6768	9.68142	10.1107	9.4336	10.5506	9.60395	11.2198	11.0798		OK		7	6	3	4	5	1	8	2	10	9		0	0	0	0	0	0	0	0	0	0		7	6	3	4	5	1	8	2
GB16021	GB45565	FBgn0038481	SP35	serine proteases	serine prot		8.09403	8.05314	9.35182	8.37062	7.94959	6.19963	7.80704	8.98883	8.13883	8.60039		OK		5	4	10	7	3	1	2	9	6	8		0	0	0	0	0	0	0	0	0	0		5	4	10	7	3	1	2	9
GB16038	GB48080	not found	SPH57	serine proteases	serine prot		#N/A	#N/A	#N/A	#N/A	#N/A	#N/A	#N/A	#N/A	#N/A	#N/A		FALSE		FALSE	FALSE	FALSE	FALSE	FALSE	FALSE	FALSE	FALSE	FALSE	FALSE
GB16147	GB45701	FBgn0027930	cSP1	serine proteases	serine prot		8.09403	8.14962	8.68091	8.46272	8.23498	9.13985	8.61317	9.02607	8.25332	8.34536		OK		1	2	8	6	3	10	7	9	4	5		0	0	0	0	0	0	0	0	0	0		1	2	8	6	3	10	7	9
GB16214	GB56027	FBgn0036287	SP38	serine proteases	serine prot		5.80541	5.52181	6.79878	6.00578	6.47956	5.81383	5.71193	5.92502	5.75774	6.3258		OK		4	1	10	7	9	5	2	6	3	8		0	0	0	0	0	0	0	0	0	0		4	1	10	7	9	5	2	6
GB16220	GB44149	FBgn0038727	cSP21	serine proteases	serine prot		8.19665	8.08195	7.14624	6.90537	6.90692	6.66204	7.45674	5.58156	8.15321	8.06865		OK		10	8	5	3	4	2	6	1	9	7		0	0	0	0	0	0	0	0	0	0		10	8	5	3	4	2	6	1
GB16367	GB40831	FBgn0038211	SP46	serine proteases	serine prot		4.22632	4.11976	4.63936	3.92777	4.37415	3.30825	3.89378	4.0086	3.99458	3.95605		OK		8	7	10	3	9	1	2	6	5	4		0	0	0	0	0	0	0	0	0	0		8	7	10	3	9	1	2	6
GB17145	GB46726	FBgn0051728	cSP7	serine proteases	serine prot		3.65356	3.63301	3.40289	3.47063	3.70007	3.30825	3.50899	3.25178	3.99458	3.29479		OK		8	7	4	5	9	3	6	1	10	2		0	0	0	0	0	0	0	0	0	0		8	7	4	5	9	3	6	1
GB17345	GB41710	FBgn0036612	SPH19	serine proteases	serine prot		9.50041	9.58546	7.74825	9.71551	9.1149	11.675	9.6764	6.18812	10.1769	9.95019		OK		4	5	2	7	3	10	6	1	9	8		0	0	0	0	0	0	0	0	0	0		4	5	2	7	3	10	6	1
GB17654	GB43369	not found	SP45	serine proteases	serine prot		5.76254	5.44594	7.14624	6.27569	6.89601	5.11278	6.10831	8.2908	5.48378	6.14841		OK		4	2	9	7	8	1	5	10	3	6		0	0	0	0	0	0	0	0	0	0		4	2	9	7	8	1	5	10
GB18178	GB41178	FBgn0038447	SP15	serine proteases	serine prot		4.48382	4.44565	4.56389	4.35173	4.30093	3.78146	4.49496	4.25676	4.33027	4.26337		OK		8	7	10	6	4	1	9	2	5	3		0	0	0	0	0	0	0	0	0	0		8	7	10	6	4	1	9	2
GB18450	GB52706	FBgn0033365	cSP26	serine proteases	serine prot		5.30183	4.78817	3.63819	4.08921	3.33407	4.54594	4.84536	3.6725	7.24111	6.94678		OK		8	6	2	4	1	5	7	3	10	9		0	0	0	0	0	0	0	0	0	0		8	6	2	4	1	5	7	3
GB18530	GB50314	not found	SP43	serine proteases	serine prot		#N/A	#N/A	#N/A	#N/A	#N/A	#N/A	#N/A	#N/A	#N/A	#N/A		FALSE		FALSE	FALSE	FALSE	FALSE	FALSE	FALSE	FALSE	FALSE	FALSE	FALSE
GB18944	GB46203	FBgn0037627	SPH37	serine proteases	serine prot		5.86735	5.80953	5.8734	5.62888	5.6721	5.55937	6.12548	6.2007	5.52962	5.79192		OK		7	6	8	3	4	2	9	10	1	5		0	0	0	0	0	0	0	0	0	0		7	6	8	3	4	2	9	10
GB19292	GB45336	not found	SPH52	serine proteases	serine prot		4.78824	4.94861	4.30354	3.83535	4.7889	3.98699	3.78484	4.41143	4.27104	4.12114		OK		8	10	6	2	9	3	1	7	5	4		0	0	0	0	0	0	0	0	0	0		8	10	6	2	9	3	1	7
GB19590	GB40567	FBgn0002926	SP20	serine proteases	serine prot		7.40991	7.14493	8.21726	7.40459	7.5933	4.88182	6.6359	6.75389	7.64392	7.43083		OK		6	4	10	5	8	1	2	3	9	7		0	0	0	0	0	0	0	0	0	0		6	4	10	5	8	1	2	3
GB19719	GB50648	FBgn0085379	cSP25	serine proteases	serine prot		4.36235	4.32651	2.82187	3.28253	3.83097	3.89004	4.75491	3.42764	4.8757	4.87289		OK		7	6	1	2	4	5	8	3	10	9		0	0	0	0	0	0	0	0	0	0		7	6	1	2	4	5	8	3
GB19846	GB50761	FBgn0038485	SP36	serine proteases	serine prot		8.5057	8.3692	8.47944	8.5493	7.43687	5.74892	7.50954	8.27909	8.35937	7.77217		OK		9	7	8	10	2	1	3	5	6	4		0	0	0	0	0	0	0	0	0	0		9	7	8	10	2	1	3	5
GB19856	GB40926	FBgn0051265	SP12	serine proteases	serine prot		#N/A	#N/A	#N/A	#N/A	#N/A	#N/A	#N/A	#N/A	#N/A	#N/A		FALSE		FALSE	FALSE	FALSE	FALSE	FALSE	FALSE	FALSE	FALSE	FALSE	FALSE
GB10506	GB52097	FBgn0058006	AmSCR-B1	Scav. Receptor A	Scav. Recep		5.96486	6.20735	6.01152	6.17675	6.09487	7.51269	6.58742	6.366	5.97024	6.86345		OK		1	6	3	5	4	10	8	7	2	9		0	0	0	0	0	0	0	0	0	0		1	6	3	5	4	10	8	7
GB11743	GB45986	FBgn0035290	AmSCR-B2	Scav. Receptor A	Scav. Recep		12.055	11.9018	12.0619	11.7083	11.9786	12.0153	12.3156	12.0574	11.7233	12.4521		OK		6	3	8	1	4	5	9	7	2	10		0	0	0	0	0	0	0	0	0	0		6	3	8	1	4	5	9	7
GB12378	GB50865	not found	AmSCR-B3	Scav. Receptor A	Scav. Recep		#N/A	#N/A	#N/A	#N/A	#N/A	#N/A	#N/A	#N/A	#N/A	#N/A		FALSE		FALSE	FALSE	FALSE	FALSE	FALSE	FALSE	FALSE	FALSE	FALSE	FALSE
GB12538	GB50482	FBgn0023479	GRAAL/Tequila-like	Scav. Receptor A	Scav. Recep		9.51318	9.48432	9.88446	9.59182	9.85837	9.54121	9.47242	9.74251	9.40099	9.54343		OK		4	3	10	7	9	5	2	8	1	6		0	0	0	0	0	0	0	0	0	0		4	3	10	7	9	5	2	8
GB12830	GB50454	not found	AmSCR-B4	Scav. Receptor A	Scav. Recep		4.29641	4.11976	3.63819	4.08921	3.54253	3.65661	4.1606	4.25676	3.82045	3.63391		OK		10	7	3	6	1	4	8	9	5	2		0	0	0	0	0	0	0	0	0	0		10	7	3	6	1	4	8	9
GB13360	GB49476	FBgn0034660	lox2-like	Scav. Receptor A	Scav. Recep		6.61737	6.61131	6.98301	6.69786	6.88502	5.33953	6.40347	6.2007	6.90904	7.43083		OK		5	4	9	6	7	1	3	2	8	10		0	0	0	0	0	0	0	0	0	0		5	4	9	6	7	1	3	2
GB13813	GB49363	FBgn0027562	AmSCR-B5	Scav. Receptor A	Scav. Recep		7.91294	7.87642	7.97865	7.8537	7.39881	8.47395	8.45412	7.18353	7.51064	8.36227		OK		6	5	7	4	2	10	9	1	3	8		0	0	0	0	0	0	0	0	0	0		6	5	7	4	2	10	9	1
GB14314	GB53014	not found	AmSCR-B6	Scav. Receptor A	Scav. Recep		8.40986	8.1261	8.26713	8.04867	8.64204	7.07312	8.1058	8.07074	8.64258	8.22847		OK		8	5	7	2	9	1	4	3	10	6		0	0	0	0	0	0	0	0	0	0		8	5	7	2	9	1	4	3
GB15549	GB48343	not found	AmSCR-B7	Scav. Receptor A	Scav. Recep		6.17454	6.35058	6.63893	6.50235	6.7461	6.4085	6.19213	6.79574	5.36196	5.98143		OK		3	5	8	7	9	6	4	10	1	2		0	0	0	0	0	0	0	0	0	0		3	5	8	7	9	6	4	10
GB16388	GB40306	not found	AmSCR-B8	Scav. Receptor A	Scav. Recep		#N/A	#N/A	#N/A	#N/A	#N/A	#N/A	#N/A	#N/A	#N/A	#N/A		FALSE		FALSE	FALSE	FALSE	FALSE	FALSE	FALSE	FALSE	FALSE	FALSE	FALSE
GB19649	GB54246	FBgn0033192	Corin-like	Scav. Receptor A	Scav. Recep		6.58124	6.25186	6.49678	5.92063	6.79392	5.3979	5.98191	5.34859	6.48741	6.56799		OK		9	5	7	3	10	2	4	1	6	8		0	0	0	0	0	0	0	0	0	0		9	5	7	3	10	2	4	1
GB19683	GB50866	FBgn0010435	AmSCR-B10	Scav. Receptor A	Scav. Recep		10.4936	10.2791	11.3297	10.6632	11.0607	9.15019	10.3991	11.0078	10.9219	11.1584		OK		4	2	10	5	8	1	3	7	6	9		0	0	0	0	0	0	0	0	0	0		4	2	10	5	8	1	3	7
GB19916	GB44045	FBgn0015924	AmSCR-B9	Scav. Receptor A	Scav. Recep		9.06565	9.11592	9.46294	9.37356	9.0841	10.1323	9.4807	9.72859	9.08986	9.53153		OK		1	4	6	5	2	10	7	9	3	8		0	0	0	0	0	0	0	0	0	0		1	4	6	5	2	10	7	9
GB19925	GB54506	FBgn0014033	AmSCR-C	Scav. Receptor A	Scav. Recep		7.04583	6.90744	7.77149	7.81693	7.87399	6.08238	7.30068	7.49362	7.73277	7.62849		OK		3	2	8	9	10	1	4	5	7	6		0	0	0	0	0	0	0	0	0	0		3	2	8	9	10	1	4	5
GB18313	GB43738	FBgn0033367	PPO	PPO - melanization	PPO - melan		8.19665	8.1102	8.50276	7.89839	8.30242	8.04348	8.29797	8.70152	8.30893	8.19488		OK		5	3	9	1	7	2	6	10	8	4		0	0	0	0	0	0	0	0	0	0		5	3	9	1	7	2	6	10
GB18767	GB50013	FBgn0036891	PPOAct	PPO - melanization	PPO - melan		8.54978	8.35241	9.93673	8.90274	9.42953	6.18346	7.41583	7.8311	8.63748	8.92338		OK		5	4	10	7	9	1	2	3	6	8		0	0	0	0	0	0	0	0	0	0		5	4	10	7	9	1	2	3
GB10231	GB40163	FBgn0034539	CG11159	Lysozyme	Lysozyme		#N/A	#N/A	#N/A	#N/A	#N/A	#N/A	#N/A	#N/A	#N/A	#N/A		FALSE		FALSE	FALSE	FALSE	FALSE	FALSE	FALSE	FALSE	FALSE	FALSE	FALSE
GB19988	GB47104	FBgn0025827		Lysozyme	Lysozyme		7.92255	7.92268	8.51198	8.31568	7.86286	8.64457	7.90384	9.12256	7.61823	7.71535		OK		5	6	8	7	3	9	4	10	1	2		0	0	0	0	0	0	0	0	0	0		5	6	8	7	3	9	4	10
GB10567	GB49149	FBgn0004647	Notch	JNK cascade ; GO:0007254	JNK cascade		7.01012	6.99684	6.63893	6.74773	7.17383	7.14121	6.97392	7.05182	7.32614	7.44361		OK		5	4	1	2	8	7	3	6	9	10		0	0	0	0	0	0	0	0	0	0		5	4	1	2	8	7	3	6
GB11373	GB45558	FBgn0010333	Rac1	JNK cascade ; GO:0007254	JNK cascade		11.1935	11.2851	11.4412	11.5989	11.3287	11.8164	11.3347	11.7054	11.1517	11.2274		OK		2	4	7	8	5	10	6	9	1	3		0	0	0	0	0	0	0	0	0	0		2	4	7	8	5	10	6	9
GB11819	GB47961	FBgn0024329	Mekk1	JNK cascade ; GO:0007254	JNK cascade		7.44373	7.42138	7.20439	6.50235	6.97067	6.5282	7.43643	6.82026	7.45947	7.12423		OK		9	7	6	1	4	2	8	3	10	5		0	0	0	0	0	0	0	0	0	0		9	7	6	1	4	2	8	3
gb12004	GB53318	FBgn0001291	Jun-related antigen	JNK cascade ; GO:0007254	JNK cascade		#N/A	#N/A	#N/A	#N/A	#N/A	#N/A	#N/A	#N/A	#N/A	#N/A		FALSE		FALSE	FALSE	FALSE	FALSE	FALSE	FALSE	FALSE	FALSE	FALSE	FALSE
GB12212	GB42049	FBgn0001297	kayak	JNK cascade ; GO:0007254	JNK cascade		#N/A	#N/A	#N/A	#N/A	#N/A	#N/A	#N/A	#N/A	#N/A	#N/A		FALSE		FALSE	FALSE	FALSE	FALSE	FALSE	FALSE	FALSE	FALSE	FALSE	FALSE
GB12587	GB49368	FBgn0014011	Rac2	JNK cascade ; GO:0007254	JNK cascade		6.35713	6.22234	5.72016	6.08607	6.22336	6.79504	6.1592	6.42066	5.65868	5.83192		OK		8	6	2	4	7	10	5	9	1	3		0	0	0	0	0	0	0	0	0	0		8	6	2	4	7	10	5	9
GB12838	GB43176	FBgn0015286	Ras-related protein	JNK cascade ; GO:0007254	JNK cascade		#N/A	#N/A	#N/A	#N/A	#N/A	#N/A	#N/A	#N/A	#N/A	#N/A		FALSE		FALSE	FALSE	FALSE	FALSE	FALSE	FALSE	FALSE	FALSE	FALSE	FALSE
GB13135	GB47431	FBgn0014020	Rho1	JNK cascade ; GO:0007254	JNK cascade		9.8655	9.85463	10.0471	10.3389	10.0335	10.2967	9.88032	10.1018	9.6618	9.94795		OK		3	2	7	10	6	9	4	8	1	5		0	0	0	0	0	0	0	0	0	0		3	2	7	10	6	9	4	8
GB14469	GB44237	FBgn0004636	Roughened	JNK cascade ; GO:0007254	JNK cascade		9.71051	9.61109	10.3167	9.95204	10.2399	10.065	11.337	10.9922	10.5996	11.5097		OK		2	1	6	3	5	4	9	8	7	10		0	0	0	0	0	0	0	0	0	0		2	1	6	3	5	4	9	8
GB14925	GB50631	FBgn0010341	Cdc42	JNK cascade ; GO:0007254	JNK cascade		8.86844	8.70433	9.02153	8.91366	8.75766	9.03217	8.74546	8.898	8.61689	8.66723		OK		6	3	9	8	5	10	4	7	1	2		0	0	0	0	0	0	0	0	0	0		6	3	9	8	5	10	4	7
GB15424	GB53394	FBgn0003371	shaggy	JNK cascade ; GO:0007254	JNK cascade		10.7478	10.7861	10.4711	10.6535	10.5518	10.9147	11.3596	10.6647	11.1716	11.6026		OK		5	6	1	3	2	7	9	4	8	10		0	0	0	0	0	0	0	0	0	0		5	6	1	3	2	7	9	4
GB16401	GB56012	FBgn0000229	basket	JNK cascade ; GO:0007254	JNK cascade		7.81823	7.56254	8.58369	8.14081	8.63552	6.96451	7.31558	7.36644	8.16034	8.04789		OK		5	4	9	7	10	1	2	3	8	6		0	0	0	0	0	0	0	0	0	0		5	4	9	7	10	1	2	3
GB16764	GB44888	FBgn0033483	eiger	JNK cascade ; GO:0007254	JNK cascade		8.18071	8.46604	8.34659	8.19195	7.70351	8.6387	8.21306	8.03985	8.18503	8.43761		OK		3	9	7	5	1	10	6	2	4	8		0	0	0	0	0	0	0	0	0	0		3	9	7	5	1	10	6	2
GB17167	GB51894	FBgn0010303	hemipterous	JNK cascade ; GO:0007254	JNK cascade		8.19268	8.05729	8.13608	7.98795	8.33096	7.87408	7.92342	7.69666	8.31533	7.95727		OK		8	6	7	5	10	2	3	1	9	4		0	0	0	0	0	0	0	0	0	0		8	6	7	5	10	2	3	1
GB17935	GB45540	FBgn0000097	anterior open	JNK cascade ; GO:0007254	JNK cascade		9.00362	9.1278	7.98529	7.75022	8.23929	8.78389	8.77538	8.39211	9.42782	9.05399		OK		7	9	2	1	3	6	5	4	10	8		0	0	0	0	0	0	0	0	0	0		7	9	2	1	3	6	5	4
GB20112	GB45657	FBgn0010341	Cdc42	JNK cascade ; GO:0007254	JNK cascade		8.52476	8.37253	8.55722	8.57153	8.35101	9.30256	8.68371	8.80106	8.43776	8.72328		OK		4	2	5	6	1	10	7	9	3	8		0	0	0	0	0	0	0	0	0	0		4	2	5	6	1	10	7	9
GB19901	GB44634	FBgn0243512		JNK cascade	JNK cascade		8.03764	7.99805	8.34143	8.22389	8.30242	8.27662	8.57657	9.49813	8.59864	8.85813		OK		2	1	6	3	5	4	7	10	8	9		0	0	0	0	0	0	0	0	0	0		2	1	6	3	5	4	7	10
GB11408	GB52985	FBgn0043884	multiple ankyrin repeats single KH domain	JAK-STAT cascade ; GO:0007259 and children	JAK-STAT ca		11.0404	10.9111	11.0596	10.8679	11.1843	10.3675	10.7985	10.4466	11.2393	11.0352		OK		7	5	8	4	9	1	3	2	10	6		0	0	0	0	0	0	0	0	0	0		7	5	8	4	9	1	3	2
GB12007	GB40911	FBgn0003612	Suppressor of variegation 2-10	JAK-STAT cascade ; GO:0007259 and children	JAK-STAT ca		7.34697	7.31432	7.51111	7.52925	7.50293	7.67633	7.4089	7.49868	7.26119	7.26782		OK		4	3	8	9	7	10	5	6	1	2		0	0	0	0	0	0	0	0	0	0		4	3	8	9	7	10	5	6
GB12159	GB42244	FBgn0043903	domeless	JAK-STAT cascade ; GO:0007259 and children	JAK-STAT ca		6.41312	6.33689	6.9288	6.68767	6.79392	6.70776	6.95498	7.07914	5.81396	6.90109		OK		3	2	8	4	6	5	9	10	1	7		0	0	0	0	0	0	0	0	0	0		3	2	8	4	6	5	9	10
GB14092	GB42304	FBgn0001319	knot	JAK-STAT cascade ; GO:0007259 and children	JAK-STAT ca		5.39017	5.39293	5.35102	5.39349	5.88828	4.36766	5.28584	5.3253	5.25598	5.4483		OK		6	7	5	8	10	1	3	4	2	9		0	0	0	0	0	0	0	0	0	0		6	7	5	8	10	1	3	4
GB16422	GB44594	FBgn0004864	hopscotch	JAK-STAT cascade ; GO:0007259 and children	JAK-STAT ca		9.41449	9.58403	9.11525	9.15911	9.57293	9.24005	9.46743	9.12092	9.45706	9.2484		OK		6	10	1	3	9	4	8	2	7	5		0	0	0	0	0	0	0	0	0	0		6	10	1	3	9	4	8	2
GB18923	GB50020	FBgn0016917	Signal-transducer and activator of transcription protein at 92E	JAK-STAT cascade ; GO:0007259 and children	JAK-STAT ca		7.15611	6.99684	6.40015	7.41077	7.30314	7.69907	7.15074	6.79574	6.77563	7.07573		OK		7	4	1	9	8	10	6	3	2	5		0	0	0	0	0	0	0	0	0	0		7	4	1	9	8	10	6	3
GB14250	GB51500	FBgn0085402		JAK-STAT cascade	JAK-STAT ca		10.8745	10.8502	11.3014	11.1467	11.0722	11.5826	11.0693	10.9719	10.8724	11.0431		OK		3	1	9	8	7	10	6	4	2	5		0	0	0	0	0	0	0	0	0	0		3	1	9	8	7	10	6	4
GB18949	GB55283	FBgn0041184		JAK-STAT cascade	JAK-STAT ca		9.19617	9.21581	9.02798	9.26692	9.30974	9.51905	9.04242	9.26881	8.96515	9.14863		OK		5	6	2	7	9	10	3	8	1	4		0	0	0	0	0	0	0	0	0	0		5	6	2	7	9	10	3	8
GB10026	GB44490	FBgn0031213		immune-related	immune-rela		10.1828	10.1422	10.1802	10.4548	9.98173	10.8188	9.93555	10.2987	9.71602	10.0662		OK		7	5	6	9	3	10	2	8	1	4		0	0	0	0	0	0	0	0	0	0		7	5	6	9	3	10	2	8
GB11320	GB53101	FBgn0020305		immune-related	immune-rela		#N/A	#N/A	#N/A	#N/A	#N/A	#N/A	#N/A	#N/A	#N/A	#N/A		FALSE		FALSE	FALSE	FALSE	FALSE	FALSE	FALSE	FALSE	FALSE	FALSE	FALSE
GB11902	GB45882	FBgn0003326		immune-related	immune-rela		9.20012	9.1877	8.80236	9.72917	8.15057	9.70724	8.85649	8.8434	9.44398	9.15058		OK		7	6	2	10	1	9	4	3	8	5		0	0	0	0	0	0	0	0	0	0		7	6	2	10	1	9	4	3
GB12454	GB48687	not found		immune-related	immune-rela		3.88621	3.63301	7.02236	5.51621	7.26132	5.24699	4.07936	5.50134	4.49145	5.34006		OK		2	1	9	8	10	5	3	7	4	6		0	0	0	0	0	0	0	0	0	0		2	1	9	8	10	5	3	7
GB12883	GB50507	not found		immune-related	immune-rela		5.41839	5.63963	5.35102	4.70239	5.53568	4.23122	4.92983	4.50407	6.05009	5.36794		OK		7	9	5	3	8	1	4	2	10	6		0	0	0	0	0	0	0	0	0	0		7	9	5	3	8	1	4	2
GB13522	GB47208	FBgn0030018		immune-related	immune-rela		7.92255	8.18799	8.01803	8.11075	8.09459	8.43726	8.32029	8.07752	8.14963	8.06865		OK		1	8	2	6	5	10	9	4	7	3		0	0	0	0	0	0	0	0	0	0		1	8	2	6	5	10	9	4
GB13979	GB50509	not found		immune-related	immune-rela		6.14169	5.41969	7.19295	6.70797	7.13729	4.15604	5.73465	5.00887	6.54333	6.93776		OK		5	3	10	7	9	1	4	2	6	8		0	0	0	0	0	0	0	0	0	0		5	3	10	7	9	1	4	2
GB14645	GB50508	FBgn0243514		immune-related	immune-rela		8.11095	7.87171	10.0691	8.70826	9.31587	5.99225	6.67121	7.54346	7.67913	8.76711		OK		6	5	10	7	9	1	2	3	4	8		0	0	0	0	0	0	0	0	0	0		6	5	10	7	9	1	2	3
GB14962	GB54664	FBgn0027594		immune-related	immune-rela		9.03275	8.96286	8.64364	9.28048	9.14276	9.07621	8.8641	8.50698	9.04049	9.17758		OK		5	4	2	10	8	7	3	1	6	9		0	0	0	0	0	0	0	0	0	0		5	4	2	10	8	7	3	1
GB15645	GB45138	FBgn0030505		immune-related	immune-rela		8.80751	8.14962	8.94532	8.83083	9.0354	7.01077	8.04456	7.27495	8.99336	9.36873		OK		5	4	7	6	9	1	3	2	8	10		0	0	0	0	0	0	0	0	0	0		5	4	7	6	9	1	3	2
GB17018	GB42358	FBgn0087011		immune-related	immune-rela		8.43022	8.30083	7.9919	7.92022	7.70974	7.53182	7.97123	7.30994	8.00657	8.54519		OK		9	8	6	4	3	2	5	1	7	10		0	0	0	0	0	0	0	0	0	0		9	8	6	4	3	2	5	1
GB18324	GB46478	FBgn0052226		immune-related	immune-rela		9.14372	9.01286	8.98559	8.96914	9.2745	8.25761	8.72888	8.4533	9.00727	9.20969		OK		8	7	5	4	10	1	3	2	6	9		0	0	0	0	0	0	0	0	0	0		8	7	5	4	10	1	3	2
GB19452	GB42685	not found		immune-related	immune-rela		9.20012	9.29174	10.2807	9.16278	8.80201	9.6761	9.18701	9.47524	8.90911	9.81059		OK		5	6	10	3	1	8	4	7	2	9		0	0	0	0	0	0	0	0	0	0		5	6	10	3	1	8	4	7
GB20003	GB42082	FBgn0041780		immune-related	immune-rela		9.09569	9.11989	9.14814	9.38929	9.06239	10.707	9.74534	9.98872	9.03274	9.63113		OK		3	4	5	6	2	10	8	9	1	7		0	0	0	0	0	0	0	0	0	0		3	4	5	6	2	10	8	9
GB10009	GB50238	FBgn0003884	alpha-Tubulin at 84B	Immune system process (GO:0002376)	Immune syst		9.58301	9.60118	8.99548	10.0473	9.0841	8.32124	9.25227	9.01729	9.0482	9.41646		OK		8	9	2	10	5	1	6	3	4	7		0	0	0	0	0	0	0	0	0	0		8	9	2	10	5	1	6	3
GB10069	GB51712	FBgn0261560	Thor	Immune system process (GO:0002376)	Immune syst		9.29935	9.3351	9.38481	9.29892	8.97728	10.1197	9.4691	9.80097	8.98736	9.37874		OK		4	5	7	3	1	10	8	9	2	6		0	0	0	0	0	0	0	0	0	0		4	5	7	3	1	10	8	9
GB10124	GB46739	FBgn0013576	mustard	Immune system process (GO:0002376)	Immune syst		10.7322	10.8562	11.0907	10.8532	10.9189	11.7679	11.9108	12.1192	11.6543	11.7985		OK		1	3	5	2	4	7	9	10	6	8		0	0	0	0	0	0	0	0	0	0		1	3	5	2	4	7	9	10
GB10171	GB55582	FBgn0261617	nejire	Immune system process (GO:0002376)	Immune syst		5.82636	5.5937	5.06936	4.51477	5.10012	5.48101	6.24014	5.50134	5.71896	6.31184		OK		8	6	2	1	3	4	9	5	7	10		0	0	0	0	0	0	0	0	0	0		8	6	2	1	3	4	9	5
GB10274	GB52588	FBgn0010247		Immune system process (GO:0002376)	Immune syst		8.35057	8.4152	8.57931	8.36107	8.35101	8.59395	8.56727	8.61104	8.70486	8.52731		OK		1	4	7	3	2	8	6	9	10	5		0	0	0	0	0	0	0	0	0	0		1	4	7	3	2	8	6	9
GB10471	GB45135	FBgn0028982	Spt6	Immune system process (GO:0002376)	Immune syst		7.59581	7.55668	7.06066	7.65443	7.46661	7.95184	7.60966	7.32142	7.46525	7.77217		OK		6	5	1	8	4	10	7	2	3	9		0	0	0	0	0	0	0	0	0	0		6	5	1	8	4	10	7	2
GB10524	GB55808	FBgn0020306		Immune system process (GO:0002376)	Immune syst		11.5946	11.5409	11.1286	11.056	11.368	10.8084	11.3306	10.7171	11.6778	11.4221		OK		9	8	4	3	6	2	5	1	10	7		0	0	0	0	0	0	0	0	0	0		9	8	4	3	6	2	5	1
GB10574	GB43216	FBgn0261547	Ephexin	Immune system process (GO:0002376)	Immune syst		10.5427	10.5679	9.97556	9.55185	9.61827	9.56613	10.1079	9.27176	10.4851	10.2298		OK		9	10	5	2	4	3	6	1	8	7		0	0	0	0	0	0	0	0	0	0		9	10	5	2	4	3	6	1
GB10654	GB47452	FBgn0261797	Dynein heavy chain 64C	Immune system process (GO:0002376)	Immune syst		11.1384	11.1044	10.6777	11.0145	11.2255	10.784	10.6669	10.4479	11.2304	10.9656		OK		8	7	3	6	9	4	2	1	10	5		0	0	0	0	0	0	0	0	0	0		8	7	3	6	9	4	2	1
GB10667	GB50038	FBgn0001108	Glued	Immune system process (GO:0002376)	Immune syst		9.24868	9.31618	9.16285	9.29892	9.37382	9.59518	9.07121	9.31683	9.24879	9.26288		OK		3	7	2	6	9	10	1	8	4	5		0	0	0	0	0	0	0	0	0	0		3	7	2	6	9	10	1	8
GB10718	GB53167	FBgn0085432		Immune system process (GO:0002376)	Immune syst		#N/A	#N/A	#N/A	#N/A	#N/A	#N/A	#N/A	#N/A	#N/A	#N/A		FALSE		FALSE	FALSE	FALSE	FALSE	FALSE	FALSE	FALSE	FALSE	FALSE	FALSE
GB10863	GB41845	FBgn0036844	Mitogen-activated protein kinase phosphatase 3	Immune system process (GO:0002376)	Immune syst		6.19069	6.32307	6.35959	6.70797	6.80563	6.86726	6.47192	6.52407	6.27895	6.56799		OK		1	3	4	8	9	10	5	6	2	7		0	0	0	0	0	0	0	0	0	0		1	3	4	8	9	10	5	6
GB10917	GB52158	FBgn0031975	Transglutaminase	Immune system process (GO:0002376)	Immune syst		8.08121	8.09816	8.84676	8.4834	8.48039	8.94221	8.53266	9.03131	8.40512	8.35215		OK		1	2	8	6	5	9	7	10	4	3		0	0	0	0	0	0	0	0	0	0		1	2	8	6	5	9	7	10
GB10996	GB53462	FBgn0005630	longitudinals lacking	Immune system process (GO:0002376)	Immune syst		#N/A	#N/A	#N/A	#N/A	#N/A	#N/A	#N/A	#N/A	#N/A	#N/A		FALSE		FALSE	FALSE	FALSE	FALSE	FALSE	FALSE	FALSE	FALSE	FALSE	FALSE
GB11052	GB43375	FBgn0040324	Ephrin	Immune system process (GO:0002376)	Immune syst		7.79747	7.88579	7.68439	7.99208	7.82894	8.25761	8.77269	8.27909	8.04561	8.71803		OK		2	4	1	5	3	7	10	8	6	9		0	0	0	0	0	0	0	0	0	0		2	4	1	5	3	7	10	8
GB11073	GB53490	FBgn0005630	longitudinals lacking	Immune system process (GO:0002376)	Immune syst		#N/A	#N/A	#N/A	#N/A	#N/A	#N/A	#N/A	#N/A	#N/A	#N/A		FALSE		FALSE	FALSE	FALSE	FALSE	FALSE	FALSE	FALSE	FALSE	FALSE	FALSE
GB11075	GB47732	FBgn0260936	scrawny	Immune system process (GO:0002376)	Immune syst		6.79603	6.76193	6.84344	6.85169	6.551	7.82842	7.15903	6.99555	6.75686	6.99976		OK		4	3	5	6	1	10	9	7	2	8		0	0	0	0	0	0	0	0	0	0		4	3	5	6	1	10	9	7
GB11202	GB49929	FBgn0002526	Laminin A	Immune system process (GO:0002376)	Immune syst		10.4528	10.4032	10.4509	10.5141	10.444	9.59366	10.256	9.69154	11.0222	10.8606		OK		7	4	6	8	5	1	3	2	10	9		0	0	0	0	0	0	0	0	0	0		7	4	6	8	5	1	3	2
GB11241	GB45708	FBgn0031975	Transglutaminase	Immune system process (GO:0002376)	Immune syst		4.64544	4.26187	7.53847	4.29179	4.83822	3.30825	3.78484	4.25676	4.5878	4.50264		OK		8	4	10	5	9	1	2	3	7	6		0	0	0	0	0	0	0	0	0	0		8	4	10	5	9	1	2	3
GB11364	GB47224	FBgn0000568	Ecdysone-induced protein 75B	Immune system process (GO:0002376)	Immune syst		#N/A	#N/A	#N/A	#N/A	#N/A	#N/A	#N/A	#N/A	#N/A	#N/A		FALSE		FALSE	FALSE	FALSE	FALSE	FALSE	FALSE	FALSE	FALSE	FALSE	FALSE
GB11410	GB52999	FBgn0027932	A kinase anchor protein 200	Immune system process (GO:0002376)	Immune syst		9.53057	9.50725	10.2901	9.708	9.74634	9.71979	11.2311	10.4967	9.98952	11.491		OK		2	1	7	3	5	4	9	8	6	10		0	0	0	0	0	0	0	0	0	0		2	1	7	3	5	4	9	8
GB11411	GB45655	FBgn0004837	Suppressor of Hairless	Immune system process (GO:0002376)	Immune syst		#N/A	#N/A	#N/A	#N/A	#N/A	#N/A	#N/A	#N/A	#N/A	#N/A		FALSE		FALSE	FALSE	FALSE	FALSE	FALSE	FALSE	FALSE	FALSE	FALSE	FALSE
GB11564	GB43099	FBgn0028982	Spt6	Immune system process (GO:0002376)	Immune syst		8.97619	8.99566	8.86126	8.76965	9.12657	8.58788	8.91385	8.56357	9.23873	8.77723		OK		7	8	5	3	9	2	6	1	10	4		0	0	0	0	0	0	0	0	0	0		7	8	5	3	9	2	6	1
GB11581	GB53848	FBgn0036752	Adenosine deaminase-related growth factor A	Immune system process (GO:0002376)	Immune syst		#N/A	#N/A	#N/A	#N/A	#N/A	#N/A	#N/A	#N/A	#N/A	#N/A		FALSE		FALSE	FALSE	FALSE	FALSE	FALSE	FALSE	FALSE	FALSE	FALSE	FALSE
GB11734	GB41654	FBgn0013799	Deformed epidermal autoregulatory factor-1	Immune system process (GO:0002376)	Immune syst		7.34697	7.08099	7.62608	7.41077	7.30314	7.12449	7.26271	7.34973	7.31977	7.23141		OK		7	1	10	9	5	2	4	8	6	3		0	0	0	0	0	0	0	0	0	0		7	1	10	9	5	2	4	8
GB11906	GB45526	FBgn0021895		Immune system process (GO:0002376)	Immune syst		7.89351	7.92722	8.1301	8.16295	7.86844	7.7652	7.69189	7.76964	7.45947	7.66168		OK		7	8	9	10	6	4	3	5	1	2		0	0	0	0	0	0	0	0	0	0		7	8	9	10	6	4	3	5
GB11941	GB43092	FBgn0013762	Cyclin-dependent kinase 5	Immune system process (GO:0002376)	Immune syst		8.47989	8.30781	8.30476	8.03673	8.24787	7.29105	7.9806	7.90917	8.04176	7.99681		OK		10	9	8	5	7	1	3	2	6	4		0	0	0	0	0	0	0	0	0	0		10	9	8	5	7	1	3	2
GB12005	GB42215	FBgn0004657	myospheroid	Immune system process (GO:0002376)	Immune syst		6.73162	6.55342	7.19295	6.22	6.47956	5.27855	5.88413	6.06958	6.47596	6.38033		OK		9	8	10	4	7	1	2	3	6	5		0	0	0	0	0	0	0	0	0	0		9	8	10	4	7	1	2	3
GB12053	GB50037	FBgn0003884	alpha-Tubulin at 84B	Immune system process (GO:0002376)	Immune syst		4.15136	4.50093	4.20153	4.01182	4.37415	3.30825	4.43549	3.6725	4.07096	3.86146		OK		6	10	7	4	8	1	9	2	5	3		0	0	0	0	0	0	0	0	0	0		6	10	7	4	8	1	9	2
GB12064	GB50654	FBgn0032363	CG6509	Immune system process (GO:0002376)	Immune syst		#N/A	#N/A	#N/A	#N/A	#N/A	#N/A	#N/A	#N/A	#N/A	#N/A		FALSE		FALSE	FALSE	FALSE	FALSE	FALSE	FALSE	FALSE	FALSE	FALSE	FALSE
GB12094	XP_006567597	FBgn0005630	longitudinals lacking	Immune system process (GO:0002376)	Immune syst		#N/A	#N/A	#N/A	#N/A	#N/A	#N/A	#N/A	#N/A	#N/A	#N/A		FALSE		FALSE	FALSE	FALSE	FALSE	FALSE	FALSE	FALSE	FALSE	FALSE	FALSE
GB12173	GB54228	FBgn0029113	Smt3 activating enzyme 2	Immune system process (GO:0002376)	Immune syst		7.85887	7.89973	7.97199	7.98795	7.846	8.98212	8.1563	8.15965	7.73277	8.08912		OK		3	4	5	6	2	10	8	9	1	7		0	0	0	0	0	0	0	0	0	0		3	4	5	6	2	10	8	9
GB12207	GB54477	FBgn0003731	Epidermal growth factor receptor	Immune system process (GO:0002376)	Immune syst		9.56472	9.4421	9.48651	9.48462	9.42576	8.97516	9.83457	9.67601	10.0251	10.02		OK		6	3	5	4	2	1	8	7	10	9		0	0	0	0	0	0	0	0	0	0		6	3	5	4	2	1	8	7
GB12209	GB55970	FBgn0005655	mutagen-sensitive 209	Immune system process (GO:0002376)	Immune syst		7.96505	7.93627	7.93131	8.12961	7.80588	8.7892	8.05347	8.24338	7.65911	7.96615		OK		5	4	3	8	2	10	7	9	1	6		0	0	0	0	0	0	0	0	0	0		5	4	3	8	2	10	7	9
GB12228	GB55583	FBgn0261617	nejire	Immune system process (GO:0002376)	Immune syst		8.47989	8.3858	8.44134	8.45676	8.69945	7.9471	8.13547	7.78629	8.55602	8.43121		OK		8	4	6	7	10	2	3	1	9	5		0	0	0	0	0	0	0	0	0	0		8	4	6	7	10	2	3	1
GB12280	GB44534	FBgn0039141	spastin	Immune system process (GO:0002376)	Immune syst		5.17427	5.15735	4.7777	5.36756	5.9535	5.77089	5.28584	5.03831	5.25598	5.34006		OK		4	3	1	8	10	9	6	2	5	7		0	0	0	0	0	0	0	0	0	0		4	3	1	8	10	9	6	2
GB12288	GB42607	FBgn0264294	Cytochrome b5	Immune system process (GO:0002376)	Immune syst		4.83245	4.91033	5.78349	5.00989	5.38424	5.077	5.31674	4.94791	5.48378	5.47407		OK		1	2	10	4	7	5	6	3	9	8		0	0	0	0	0	0	0	0	0	0		1	2	10	4	7	5	6	3
GB12298	GB48789	FBgn0032363	CG6509	Immune system process (GO:0002376)	Immune syst		7.66621	7.82377	7.03524	7.59592	8.45469	7.42673	7.51601	7.0027	8.06475	7.46884		OK		7	8	2	6	10	3	5	1	9	4		0	0	0	0	0	0	0	0	0	0		7	8	2	6	10	3	5	1
GB12312	GB47313	FBgn0003261	Rm62	Immune system process (GO:0002376)	Immune syst		11.7688	11.7642	11.3113	11.8639	11.6175	11.4458	11.17	11.291	11.4762	11.4346		OK		9	8	3	10	7	5	1	2	6	4		0	0	0	0	0	0	0	0	0	0		9	8	3	10	7	5	1	2
GB12357	GB42600	FBgn0036844	Mitogen-activated protein kinase phosphatase 3	Immune system process (GO:0002376)	Immune syst		7.47676	7.46583	7.69253	7.66999	7.42177	7.65904	7.59141	7.82709	7.27441	7.51196		OK		4	3	9	8	2	7	6	10	1	5		0	0	0	0	0	0	0	0	0	0		4	3	9	8	2	7	6	10
GB12373	GB46510	FBgn0010247	Poly-(ADP-ribose) polymerase	Immune system process (GO:0002376)	Immune syst		6.9735	7.01407	6.76821	7.0152	6.69662	7.79715	6.9833	7.20848	6.9835	7.017		OK		3	6	2	7	1	10	4	9	5	8		0	0	0	0	0	0	0	0	0	0		3	6	2	7	1	10	4	9
GB12465	GB45757	FBgn0003896	tailup	Immune system process (GO:0002376)	Immune syst		5.23956	4.94861	4.90237	5.20064	5.56406	4.70109	5.18868	4.63076	5.04765	4.87289		OK		9	5	4	8	10	2	7	1	6	3		0	0	0	0	0	0	0	0	0	0		9	5	4	8	10	2	7	1
GB12478	GB49992	FBgn0021895	yantar	Immune system process (GO:0002376)	Immune syst		7.66621	7.5449	7.52941	7.67514	7.39881	7.62383	7.79646	7.64282	7.78909	7.81213		OK		6	3	2	7	1	4	9	5	8	10		0	0	0	0	0	0	0	0	0	0		6	3	2	7	1	4	9	5
GB12556	GB55472	FBgn0003205	Ras oncogene at 85D	Immune system process (GO:0002376)	Immune syst		7.10626	7.29332	7.02236	7.38586	7.20947	7.51269	7.02929	7.45767	7.39435	7.22401		OK		3	6	1	7	4	10	2	9	8	5		0	0	0	0	0	0	0	0	0	0		3	6	1	7	4	10	2	9
GB12585	GB41629	FBgn0025936	Eph receptor tyrosine kinase	Immune system process (GO:0002376)	Immune syst		10.254	10.1808	10.196	9.51074	10.1364	10.6204	11.3636	10.811	10.7406	11.4728		OK		5	3	4	1	2	6	9	8	7	10		0	0	0	0	0	0	0	0	0	0		5	3	4	1	2	6	9	8
GB12639	GB55272	FBgn0011202	diaphanous	Immune system process (GO:0002376)	Immune syst		9.98725	9.97356	9.89507	9.62807	9.91196	9.7955	10.0311	9.79173	10.1076	9.94346		OK		8	7	4	1	5	3	9	2	10	6		0	0	0	0	0	0	0	0	0	0		8	7	4	1	5	3	9	2
GB12643	GB55408	FBgn0030964	PDGF- and VEGF-related factor 1	Immune system process (GO:0002376)	Immune syst		9.47614	9.43734	9.31015	9.23768	9.29119	8.5415	9.40966	8.93016	9.37824	9.45005		OK		10	8	5	3	4	1	7	2	6	9		0	0	0	0	0	0	0	0	0	0		10	8	5	3	4	1	7	2
GB12742	GB53016	FBgn0085407	PDGF- and VEGF-related factor 3	Immune system process (GO:0002376)	Immune syst		#N/A	#N/A	#N/A	#N/A	#N/A	#N/A	#N/A	#N/A	#N/A	#N/A		FALSE		FALSE	FALSE	FALSE	FALSE	FALSE	FALSE	FALSE	FALSE	FALSE	FALSE
GB12839	GB46452	FBgn0000996	double parked	Immune system process (GO:0002376)	Immune syst		9.13548	9.20276	8.81731	8.5465	8.65177	8.8076	9.09081	8.80106	9.28349	8.87		OK		8	9	5	1	2	4	7	3	10	6		0	0	0	0	0	0	0	0	0	0		8	9	5	1	2	4	7	3
GB13057	GB40690	FBgn0264707	RhoGEF3	Immune system process (GO:0002376)	Immune syst		9.59958	9.48278	9.52572	8.74296	9.8806	8.40998	9.81113	9.15334	9.84217	9.83017		OK		6	4	5	2	10	1	7	3	9	8		0	0	0	0	0	0	0	0	0	0		6	4	5	2	10	1	7	3
GB13109	GB44213	FBgn0014141	cheerio	Immune system process (GO:0002376)	Immune syst		8.7654	8.332	9.69512	8.98372	9.60998	6.42231	7.78045	7.54346	8.8106	9.07465		OK		5	4	10	7	9	1	3	2	6	8		0	0	0	0	0	0	0	0	0	0		5	4	10	7	9	1	3	2
GB13113	GB50397	FBgn0021873	Gef26	Immune system process (GO:0002376)	Immune syst		6.86768	6.63382	7.18141	6.70797	7.11866	6.97388	6.68278	6.53401	7.31338	7.37852		OK		5	2	8	4	7	6	3	1	9	10		0	0	0	0	0	0	0	0	0	0		5	2	8	4	7	6	3	1
GB13159	GB53150	FBgn0263289	scribbled	Immune system process (GO:0002376)	Immune syst		9.39218	9.27758	8.92821	9.06627	9.46674	8.89135	9.18498	8.46884	9.27366	9.12109		OK		9	8	3	4	10	2	6	1	7	5		0	0	0	0	0	0	0	0	0	0		9	8	3	4	10	2	6	1
GB13170	GB46539	FBgn0040068	vav	Immune system process (GO:0002376)	Immune syst		10.0522	10.039	9.49351	9.58228	10.1189	9.09987	9.68359	9.29083	9.98048	9.72822		OK		9	8	3	4	10	1	5	2	7	6		0	0	0	0	0	0	0	0	0	0		9	8	3	4	10	1	5	2
GB13192	GB49985	FBgn0259984		Immune system process (GO:0002376)	Immune syst		5.84701	5.84896	5.43321	6.02221	6.20571	5.48101	5.54149	5.17643	6.05009	6.22504		OK		5	6	2	7	9	3	4	1	8	10		0	0	0	0	0	0	0	0	0	0		5	6	2	7	9	3	4	1
GB13202	GB40333	FBgn0040324	Ephrin	Immune system process (GO:0002376)	Immune syst		3.65356	3.63301	3.40289	3.28253	3.83097	3.50654	3.65958	2.82187	3.27554	2.82187		OK		8	7	5	4	10	6	9	1	3	1		0	0	0	0	0	0	0	0.5	0	0.5		8	7	5	4	10	6	9	1.5
GB13381	GB52563	FBgn0000212	brahma	Immune system process (GO:0002376)	Immune syst		10.5466	10.5802	10.3671	10.2556	10.5501	10.338	10.4285	10.2075	10.7088	10.5565		OK		6	9	4	2	7	3	5	1	10	8		0	0	0	0	0	0	0	0	0	0		6	9	4	2	7	3	5	1
GB13405	GB54530	FBgn0031216	CG11376	Immune system process (GO:0002376)	Immune syst		7.61966	7.48447	7.02236	7.40459	7.41416	7.14121	7.12557	7.06555	7.20702	7.31034		OK		10	9	1	7	8	4	3	2	5	6		0	0	0	0	0	0	0	0	0	0		10	9	1	7	8	4	3	2
GB13459	GB51481	FBgn0031464	Dual oxidase	Immune system process (GO:0002376)	Immune syst		10.5659	10.4994	10.1242	9.94567	9.84572	8.51614	10.1312	8.6157	10.8305	10.2472		OK		9	8	5	4	3	1	6	2	10	7		0	0	0	0	0	0	0	0	0	0		9	8	5	4	3	1	6	2
GB13523	GB53472	FBgn0005630	longitudinals lacking	Immune system process (GO:0002376)	Immune syst		#N/A	#N/A	#N/A	#N/A	#N/A	#N/A	#N/A	#N/A	#N/A	#N/A		FALSE		FALSE	FALSE	FALSE	FALSE	FALSE	FALSE	FALSE	FALSE	FALSE	FALSE
GB13567	GB41547	FBgn0259099	Doublecortin-domain-containing echinoderm-microtubule-associated protein ortholog	Immune system process (GO:0002376)	Immune syst		10.2174	10.1921	10.8457	10.3349	10.5492	10.6212	10.682	10.2827	10.3087	10.5579		OK		2	1	10	5	6	8	9	3	4	7		0	0	0	0	0	0	0	0	0	0		2	1	10	5	6	8	9	3
GB13582	GB54852	FBgn0032006	PDGF- and VEGF-receptor related	Immune system process (GO:0002376)	Immune syst		9.47288	9.59548	9.55277	9.54344	9.68294	9.84598	9.56562	9.40293	9.45416	9.5944		OK		3	8	5	4	9	10	6	1	2	7		0	0	0	0	0	0	0	0	0	0		3	8	5	4	9	10	6	1
GB13642	GB41009	FBgn0031975	Transglutaminase	Immune system process (GO:0002376)	Immune syst		#N/A	#N/A	#N/A	#N/A	#N/A	#N/A	#N/A	#N/A	#N/A	#N/A		FALSE		FALSE	FALSE	FALSE	FALSE	FALSE	FALSE	FALSE	FALSE	FALSE	FALSE
GB13665	GB49498	FBgn0038046	CG5641	Immune system process (GO:0002376)	Immune syst		7.79223	7.50286	7.76378	8.09163	7.88504	8.10433	7.61569	7.96507	7.55465	7.67257		OK		6	1	5	9	7	10	3	8	2	4		0	0	0	0	0	0	0	0	0	0		6	1	5	9	7	10	3	8
GB13670	GB46338	FBgn0043550	Tetraspanin 68C	Immune system process (GO:0002376)	Immune syst		5.7406	5.66204	5.21757	5.28668	5.53568	5.58453	5.82202	5.20242	5.75774	5.34006		OK		8	7	2	3	5	6	10	1	9	4		0	0	0	0	0	0	0	0	0	0		8	7	2	3	5	6	10	1
GB13747	GB47828	FBgn0011764		Immune system process (GO:0002376)	Immune syst		8.25489	8.20305	7.91053	8.28573	8.2775	8.38568	8.06673	8.07752	8.24328	8.54815		OK		6	4	1	8	7	9	2	3	5	10		0	0	0	0	0	0	0	0	0	0		6	4	1	8	7	9	2	3
GB13819	GB51694	FBgn0003447	singed	Immune system process (GO:0002376)	Immune syst		7.85385	7.93175	7.40609	7.74533	7.82894	8.20699	7.81754	7.44199	7.50505	7.77217		OK		8	9	1	4	7	10	6	2	3	5		0	0	0	0	0	0	0	0	0	0		8	9	1	4	7	10	6	2
GB13884	GB49904	FBgn0000490	decapentaplegic	Immune system process (GO:0002376)	Immune syst		#N/A	#N/A	#N/A	#N/A	#N/A	#N/A	#N/A	#N/A	#N/A	#N/A		FALSE		FALSE	FALSE	FALSE	FALSE	FALSE	FALSE	FALSE	FALSE	FALSE	FALSE
GB13967	GB40759	FBgn0043841	virus-induced RNA 1	Immune system process (GO:0002376)	Immune syst		#N/A	#N/A	#N/A	#N/A	#N/A	#N/A	#N/A	#N/A	#N/A	#N/A		FALSE		FALSE	FALSE	FALSE	FALSE	FALSE	FALSE	FALSE	FALSE	FALSE	FALSE
GB14060	GB48932	FBgn0260935	immune response deficient 1	Immune system process (GO:0002376)	Immune syst		10.8177	10.8388	10.3232	10.2094	10.4634	9.74865	10.4138	9.87864	10.7822	10.3286		OK		9	10	4	3	7	1	6	2	8	5		0	0	0	0	0	0	0	0	0	0		9	10	4	3	7	1	6	2
GB14141	GB52278	FBgn0014141	cheerio	Immune system process (GO:0002376)	Immune syst		5.55136	5.8873	6.08833	5.92063	6.01583	5.00239	4.97008	5.17643	5.46027	5.85151		OK		5	7	10	8	9	2	1	3	4	6		0	0	0	0	0	0	0	0	0	0		5	7	10	8	9	2	1	3
GB14169	GB50932	FBgn0003117	pannier	Immune system process (GO:0002376)	Immune syst		8.06394	7.82377	7.98529	7.30842	7.92839	7.44029	8.02657	7.94297	7.51622	8.05207		OK		10	4	7	1	5	2	8	6	3	9		0	0	0	0	0	0	0	0	0	0		10	4	7	1	5	2	8	6
GB14289	GB51067	FBgn0082598	akirin	Immune system process (GO:0002376)	Immune syst		9.19418	9.23242	9.10005	9.50642	9.10313	10.0996	9.45405	9.47908	9.14121	9.33487		OK		4	5	1	9	2	10	7	8	3	6		0	0	0	0	0	0	0	0	0	0		4	5	1	9	2	10	7	8
GB14441	GB56005	FBgn0026379	Pten	Immune system process (GO:0002376)	Immune syst		8.29615	8.23272	8.2941	8.22038	8.41334	8.42027	8.56104	8.15325	8.50372	8.497		OK		5	3	4	2	6	7	10	1	9	8		0	0	0	0	0	0	0	0	0	0		5	3	4	2	6	7	10	1
GB14446	GB44948	FBgn0259099	Doublecortin-domain-containing echinoderm-microtubule-associated protein ortholog	Immune system process (GO:0002376)	Immune syst		7.07204	6.83168	6.9288	6.7575	7.24424	5.53374	6.40347	6.11021	7.27441	7.12423		OK		7	5	6	4	9	1	3	2	10	8		0	0	0	0	0	0	0	0	0	0		7	5	6	4	9	1	3	2
GB14487	GB44982	FBgn0010395	beta[nu] integrin	Immune system process (GO:0002376)	Immune syst		10.3426	10.1827	9.96553	9.46398	9.82151	7.37822	9.43543	9.12583	10.6681	9.99748		OK		9	8	6	4	5	1	3	2	10	7		0	0	0	0	0	0	0	0	0	0		9	8	6	4	5	1	3	2
GB14518	GB55704	FBgn0026207	members only	Immune system process (GO:0002376)	Immune syst		7.25851	7.20614	7.30347	7.00704	7.11866	7.33529	7.33034	7.22692	7.41241	7.25337		OK		6	3	7	1	2	9	8	4	10	5		0	0	0	0	0	0	0	0	0	0		6	3	7	1	2	9	8	4
GB14545	GB42785	FBgn0039702	Vacuolar protein sorting 16B	Immune system process (GO:0002376)	Immune syst		8.43022	8.39894	8.35174	8.22389	8.11818	8.00752	8.37105	8.05366	8.33437	8.1093		OK		10	9	7	5	4	1	8	2	6	3		0	0	0	0	0	0	0	0	0	0		10	9	7	5	4	1	8	2
GB14602	GB43446	FBgn0040505		Immune system process (GO:0002376)	Immune syst		8.52791	8.24369	7.82429	7.45934	8.72731	7.72145	9.01533	8.10763	8.82188	8.45978		OK		7	5	3	1	8	2	10	4	9	6		0	0	0	0	0	0	0	0	0	0		7	5	3	1	8	2	10	4
GB14619	GB42579	FBgn0262738	no receptor potential A	Immune system process (GO:0002376)	Immune syst		8.6341	8.13791	8.92476	8.35147	8.9301	7.38525	8.51986	8.3168	9.24041	8.76456		OK		6	2	8	4	9	1	5	3	10	7		0	0	0	0	0	0	0	0	0	0		6	2	8	4	9	1	5	3
GB14763	GB53451	FBgn0005630	longitudinals lacking	Immune system process (GO:0002376)	Immune syst		#N/A	#N/A	#N/A	#N/A	#N/A	#N/A	#N/A	#N/A	#N/A	#N/A		FALSE		FALSE	FALSE	FALSE	FALSE	FALSE	FALSE	FALSE	FALSE	FALSE	FALSE
GB14801	GB49927	FBgn0050420	Activating transcription factor-2	Immune system process (GO:0002376)	Immune syst		6.77488	6.8121	5.98496	6.49066	7.03171	7.13287	6.65953	6.75389	6.34349	6.33963		OK		7	8	1	4	9	10	5	6	3	2		0	0	0	0	0	0	0	0	0	0		7	8	1	4	9	10	5	6
GB14813	GB42608	FBgn0264294	Cytochrome b5	Immune system process (GO:0002376)	Immune syst		#N/A	#N/A	#N/A	#N/A	#N/A	#N/A	#N/A	#N/A	#N/A	#N/A		FALSE		FALSE	FALSE	FALSE	FALSE	FALSE	FALSE	FALSE	FALSE	FALSE	FALSE
GB14837	GB53251	FBgn0243511		Immune system process (GO:0002376)	Immune syst		8.77073	8.67492	8.58369	8.71826	8.56862	9.08701	8.61016	8.72112	8.61948	8.66723		OK		9	6	2	7	1	10	3	8	4	5		0	0	0	0	0	0	0	0	0	0		9	6	2	7	1	10	3	8
GB14882	GB53826	FBgn0011766	E2F transcription factor	Immune system process (GO:0002376)	Immune syst		6.79603	7.08099	6.45891	6.92282	6.64537	7.60589	7.10854	7.25712	7.07713	7.14788		OK		3	6	1	4	2	10	7	9	5	8		0	0	0	0	0	0	0	0	0	0		3	6	1	4	2	10	7	9
GB14945	GB53149	FBgn0263289	scribbled	Immune system process (GO:0002376)	Immune syst		#N/A	#N/A	#N/A	#N/A	#N/A	#N/A	#N/A	#N/A	#N/A	#N/A		FALSE		FALSE	FALSE	FALSE	FALSE	FALSE	FALSE	FALSE	FALSE	FALSE	FALSE
GB15003	GB53487	FBgn0005630	longitudinals lacking	Immune system process (GO:0002376)	Immune syst		#N/A	#N/A	#N/A	#N/A	#N/A	#N/A	#N/A	#N/A	#N/A	#N/A		FALSE		FALSE	FALSE	FALSE	FALSE	FALSE	FALSE	FALSE	FALSE	FALSE	FALSE
GB15155	GB48639	FBgn0004197	Serrate	Immune system process (GO:0002376)	Immune syst		6.12497	5.57015	6.40015	5.90297	6.30849	5.83481	6.07334	6.44195	6.55426	6.84426		OK		5	1	7	3	6	2	4	8	9	10		0	0	0	0	0	0	0	0	0	0		5	1	7	3	6	2	4	8
GB15156	GB53491	FBgn0005630	longitudinals lacking	Immune system process (GO:0002376)	Immune syst		4.74243	4.94861	5.01604	4.46291	4.83822	3.98699	4.37282	4.14006	4.54059	4.32807		OK		7	9	10	5	8	1	4	2	6	3		0	0	0	0	0	0	0	0	0	0		7	9	10	5	8	1	4	2
GB15281	GB55293	FBgn0260934	par-1	Immune system process (GO:0002376)	Immune syst		10.4896	10.413	10.391	10.517	10.7099	10.5132	10.5156	9.86304	10.4212	10.5798		OK		5	3	2	8	10	6	7	1	4	9		0	0	0	0	0	0	0	0	0	0		5	3	2	8	10	6	7	1
GB15447	GB45431	FBgn0014380	rho-like	Immune system process (GO:0002376)	Immune syst		9.75152	9.81352	10.3997	10.0314	9.99707	10.1895	9.95112	10.3415	9.8543	9.74379		OK		2	3	10	7	6	8	5	9	4	1		0	0	0	0	0	0	0	0	0	0		2	3	10	7	6	8	5	9
GB15719	GB50640	FBgn0086899	Tousled-like kinase	Immune system process (GO:0002376)	Immune syst		9.82637	9.78002	9.6931	9.73534	9.86675	9.50783	9.63844	9.44936	9.85869	9.67103		OK		8	7	5	6	10	2	3	1	9	4		0	0	0	0	0	0	0	0	0	0		8	7	5	6	10	2	3	1
GB15805	GB40436	FBgn0023167	Small ribonucleoprotein particle protein SmD3	Immune system process (GO:0002376)	Immune syst		#N/A	#N/A	#N/A	#N/A	#N/A	#N/A	#N/A	#N/A	#N/A	#N/A		FALSE		FALSE	FALSE	FALSE	FALSE	FALSE	FALSE	FALSE	FALSE	FALSE	FALSE
GB16114	GB54297	FBgn0021875	Zinc finger protein RP-8	Immune system process (GO:0002376)	Immune syst		7.9697	8.06967	8.15386	8.18114	7.90688	8.94934	8.33497	8.55874	8.00261	8.29693		OK		2	4	5	6	1	10	8	9	3	7		0	0	0	0	0	0	0	0	0	0		2	4	5	6	1	10	8	9
GB16187	GB49505	FBgn0036980	RhoBTB	Immune system process (GO:0002376)	Immune syst		7.25089	7.18349	7.19295	7.19821	7.87399	5.74892	6.75035	6.61113	7.37607	6.89177		OK		8	5	6	7	10	1	3	2	9	4		0	0	0	0	0	0	0	0	0	0		8	5	6	7	10	1	3	2
GB16396	GB41740	FBgn0021760	chromosome bows	Immune system process (GO:0002376)	Immune syst		10.634	10.7084	10.7438	10.4208	10.429	10.6338	10.9658	10.3485	10.5878	10.9132		OK		6	7	8	2	3	5	10	1	4	9		0	0	0	0	0	0	0	0	0	0		6	7	8	2	3	5	10	1
GB16409	GB43185	FBgn0031537	sec5	Immune system process (GO:0002376)	Immune syst		8.12767	8.13791	7.95179	7.88513	8.12751	7.72145	7.97123	7.67893	8.07987	7.8072		OK		9	10	5	4	8	2	6	1	7	3		0	0	0	0	0	0	0	0	0	0		9	10	5	4	8	2	6	1
GB16431	GB52721	FBgn0002576	lozenge	Immune system process (GO:0002376)	Immune syst		4.54014	3.75456	5.01604	4.56446	5.28458	3.30825	4.236	3.85651	4.44018	4.44732		OK		7	2	9	8	10	1	4	3	5	6		0	0	0	0	0	0	0	0	0	0		7	2	9	8	10	1	4	3
GB16457	GB45131	FBgn0003963	u-shaped	Immune system process (GO:0002376)	Immune syst		7.27364	7.14493	8.1241	7.00704	7.39108	6.77371	6.95498	8.05022	7.51064	7.13216		OK		6	5	10	3	7	1	2	9	8	4		0	0	0	0	0	0	0	0	0	0		6	5	10	3	7	1	2	9
GB16508	GB49120	FBgn0003079	pole hole	Immune system process (GO:0002376)	Immune syst		6.98274	6.92578	6.68879	6.81476	6.93915	7.7047	6.78297	7.15172	7.09216	7.17115		OK		6	4	1	3	5	10	2	8	7	9		0	0	0	0	0	0	0	0	0	0		6	4	1	3	5	10	2	8
GB16550	GB46540	FBgn0264294	Cytochrome b5	Immune system process (GO:0002376)	Immune syst		7.65472	7.70173	7.95179	7.41694	7.128	8.12126	7.30815	7.93179	7.48812	7.338		OK		6	7	9	4	1	10	2	8	5	3		0	0	0	0	0	0	0	0	0	0		6	7	9	4	1	10	2	8
gb16573	GB49979	FBgn0043550	Tetraspanin 68C	Immune system process (GO:0002376)	Immune syst		#N/A	#N/A	#N/A	#N/A	#N/A	#N/A	#N/A	#N/A	#N/A	#N/A		FALSE		FALSE	FALSE	FALSE	FALSE	FALSE	FALSE	FALSE	FALSE	FALSE	FALSE
GB16611	GB55798	FBgn0027491	Cdk5 activator-like protein	Immune system process (GO:0002376)	Immune syst		6.53159	6.29501	4.08877	5.39349	8.06576	4.23122	4.80094	4.0086	6.61811	5.15954		OK		8	7	2	6	10	3	4	1	9	5		0	0	0	0	0	0	0	0	0	0		8	7	2	6	10	3	4	1
GB16613	GB40656	FBgn0011823	Pendulin	Immune system process (GO:0002376)	Immune syst		8.31086	8.27611	8.45096	8.64676	8.47675	8.38917	8.07551	8.34796	8.07233	8.2613		OK		5	4	8	10	9	7	2	6	1	3		0	0	0	0	0	0	0	0	0	0		5	4	8	10	9	7	2	6
GB16680	GB51745	FBgn0037116	CG7158	Immune system process (GO:0002376)	Immune syst		8.57133	8.50909	8.1656	8.47162	8.55486	8.3139	8.22888	8.15645	8.44069	8.1133		OK		10	8	3	7	9	5	4	2	6	1		0	0	0	0	0	0	0	0	0	0		10	8	3	7	9	5	4	2
GB16711	GB41850	FBgn0029167	Hemolectin	Immune system process (GO:0002376)	Immune syst		11.0125	10.9523	10.8264	10.6212	10.7662	9.87245	11.0179	10.0657	11.5901	10.8409		OK		8	7	5	3	4	1	9	2	10	6		0	0	0	0	0	0	0	0	0	0		8	7	5	3	4	1	9	2
GB16736	GB48230	FBgn0050420	Activating transcription factor-2	Immune system process (GO:0002376)	Immune syst		8.1524	8.14573	8.06266	7.89839	8.02641	8.47395	8.41664	8.27909	8.24998	8.28987		OK		5	4	3	1	2	10	9	7	6	8		0	0	0	0	0	0	0	0	0	0		5	4	3	1	2	10	9	7
GB16739	GB55914	FBgn0261524	licorne	Immune system process (GO:0002376)	Immune syst		8.51843	8.52716	8.60108	8.81461	8.55832	8.79711	8.34226	8.68165	8.33752	8.53329		OK		3	4	7	10	6	9	2	8	1	5		0	0	0	0	0	0	0	0	0	0		3	4	7	10	6	9	2	8
GB16821	GB52515	FBgn0002526	Laminin A	Immune system process (GO:0002376)	Immune syst		#N/A	#N/A	#N/A	#N/A	#N/A	#N/A	#N/A	#N/A	#N/A	#N/A		FALSE		FALSE	FALSE	FALSE	FALSE	FALSE	FALSE	FALSE	FALSE	FALSE	FALSE
GB16921	GB40741	FBgn0052133	ptip	Immune system process (GO:0002376)	Immune syst		8.18471	8.02374	7.83903	7.71567	8.15969	7.56933	7.69758	7.43672	7.94594	7.71535		OK		10	8	6	5	9	2	3	1	7	4		0	0	0	0	0	0	0	0	0	0		10	8	6	5	9	2	3	1
GB17030	GB50930	FBgn0003507		Immune system process (GO:0002376)	Immune syst		#N/A	#N/A	#N/A	#N/A	#N/A	#N/A	#N/A	#N/A	#N/A	#N/A		FALSE		FALSE	FALSE	FALSE	FALSE	FALSE	FALSE	FALSE	FALSE	FALSE	FALSE
GB17138	GB51962	FBgn0086902	kismet	Immune system process (GO:0002376)	Immune syst		12.4204	12.4441	11.9821	11.7167	12.3446	11.6711	12.213	11.5485	12.7754	12.2731		OK		8	9	4	3	7	2	5	1	10	6		0	0	0	0	0	0	0	0	0	0		8	9	4	3	7	2	5	1
GB17192	GB52973	FBgn0260866	defense repressor 1	Immune system process (GO:0002376)	Immune syst		8.92691	8.94953	8.68499	8.92017	8.86748	9.34097	9.31286	9.751	8.99137	9.14668		OK		4	5	1	3	2	9	8	10	6	7		0	0	0	0	0	0	0	0	0	0		4	5	1	3	2	9	8	10
GB17303	GB49949	FBgn0035850	Autophagy-specific gene 18	Immune system process (GO:0002376)	Immune syst		7.81307	7.89046	7.83903	8.2274	7.99617	8.31757	7.72015	7.92805	7.62856	7.90281		OK		3	5	4	9	8	10	2	7	1	6		0	0	0	0	0	0	0	0	0	0		3	5	4	9	8	10	2	7
GB17556	GB54853	FBgn0032006	PDGF- and VEGF-receptor related	Immune system process (GO:0002376)	Immune syst		#N/A	#N/A	#N/A	#N/A	#N/A	#N/A	#N/A	#N/A	#N/A	#N/A		FALSE		FALSE	FALSE	FALSE	FALSE	FALSE	FALSE	FALSE	FALSE	FALSE	FALSE
GB17628	GB46302	FBgn0262738	no receptor potential A	Immune system process (GO:0002376)	Immune syst		7.89839	7.91812	7.70062	7.79345	8.10407	6.16711	8.06233	7.49362	8.11701	8.01832		OK		5	6	3	4	9	1	8	2	10	7		0	0	0	0	0	0	0	0	0	0		5	6	3	4	9	1	8	2
GB17687	GB55584	FBgn0016794	daughter of sevenless	Immune system process (GO:0002376)	Immune syst		8.10252	7.91812	8.09983	8.08004	8.15514	8.20302	8.21703	7.8939	8.06094	8.06865		OK		7	2	6	5	8	9	10	1	3	4		0	0	0	0	0	0	0	0	0	0		7	2	6	5	8	9	10	1
GB17764	GB40429	FBgn0015790	Rab-protein 11	Immune system process (GO:0002376)	Immune syst		9.75017	9.85463	9.87378	10.347	10.0322	10.0263	9.47905	9.99678	9.64157	9.74379		OK		4	5	6	10	9	8	1	7	2	3		0	0	0	0	0	0	0	0	0	0		4	5	6	10	9	8	1	7
GB17971	GB51743	FBgn0000490	decapentaplegic	Immune system process (GO:0002376)	Immune syst		7.61373	7.36214	7.20439	7.64921	7.39108	8.19904	7.35941	7.64282	7.20011	7.583		OK		7	4	2	9	5	10	3	8	1	6		0	0	0	0	0	0	0	0	0	0		7	4	2	9	5	10	3	8
GB18039	GB45082	FBgn0015296	SHC-adaptor protein	Immune system process (GO:0002376)	Immune syst		8.36474	8.34902	8.00503	8.75272	8.19117	8.62394	8.43038	8.39211	8.22639	8.40207		OK		5	4	1	10	2	9	8	6	3	7		0	0	0	0	0	0	0	0	0	0		5	4	1	10	2	9	8	6
GB18366	GB41829	FBgn0034366	Autophagy-specific gene 7	Immune system process (GO:0002376)	Immune syst		9.26199	9.21581	8.99548	9.11249	9.20793	9.02095	9.16458	8.89032	9.17152	8.99451		OK		10	9	3	5	8	4	6	1	7	2		0	0	0	0	0	0	0	0	0	0		10	9	3	5	8	4	6	1
GB18378	GB43282	FBgn0004435	G protein alpha49B	Immune system process (GO:0002376)	Immune syst		7.79747	7.47207	7.04801	7.72562	8.21762	8.23447	7.65722	7.64282	7.35755	7.275		OK		8	4	1	7	9	10	6	5	3	2		0	0	0	0	0	0	0	0	0	0		8	4	1	7	9	10	6	5
GB18613	GB52625	FBgn0003118	pointed	Immune system process (GO:0002376)	Immune syst		7.03699	7.1053	7.44517	7.18382	7.5523	7.1495	8.96194	8.18497	7.80739	8.74665		OK		1	2	5	4	6	3	10	8	7	9		0	0	0	0	0	0	0	0	0	0		1	2	5	4	6	3	10	8
GB18619	GB50333	FBgn0261592	Ribosomal protein S6	Immune system process (GO:0002376)	Immune syst		13.0929	13.0722	13.2331	12.8704	12.6575	12.8069	12.879	12.5562	12.9752	12.798		OK		9	8	10	5	2	4	6	1	7	3		0	0	0	0	0	0	0	0	0	0		9	8	10	5	2	4	6	1
GB18627	GB48763	FBgn0000022	achaete	Immune system process (GO:0002376)	Immune syst		5.94589	6.01382	5.26354	5.28668	6.13279	5.97351	5.88413	5.20242	6.16914	6.10035		OK		5	7	2	3	9	6	4	1	10	8		0	0	0	0	0	0	0	0	0	0		5	7	2	3	9	6	4	1
GB18643	GB47453	FBgn0261797	Dynein heavy chain 64C	Immune system process (GO:0002376)	Immune syst		#N/A	#N/A	#N/A	#N/A	#N/A	#N/A	#N/A	#N/A	#N/A	#N/A		FALSE		FALSE	FALSE	FALSE	FALSE	FALSE	FALSE	FALSE	FALSE	FALSE	FALSE
GB18722	GB54764	FBgn0026404	Nedd2-like caspase	Immune system process (GO:0002376)	Immune syst		7.24322	7.25764	7.16978	7.1546	7.09979	7.82842	7.47013	7.38844	7.43613	7.41793		OK		4	5	3	2	1	10	9	6	8	7		0	0	0	0	0	0	0	0	0	0		4	5	3	2	1	10	9	6
GB18769	GB55827	FBgn0015521	Ribosomal protein S21	Immune system process (GO:0002376)	Immune syst		6.20666	6.55342	6.27481	6.7575	6.43491	6.62677	6.44493	6.54388	6.21132	6.28349		OK		1	8	3	10	5	9	6	7	2	4		0	0	0	0	0	0	0	0	0	0		1	8	3	10	5	9	6	7
GB18813	GB51292	FBgn0260642	Antennapedia	Immune system process (GO:0002376)	Immune syst		4.36235	4.69965	5.35102	4.93963	4.93151	4.23122	4.70712	4.7816	4.5878	4.74659		OK		2	4	10	9	8	1	5	7	3	6		0	0	0	0	0	0	0	0	0	0		2	4	10	9	8	1	5	7
GB18882	GB42706	FBgn0011766		Immune system process (GO:0002376)	Immune syst		5.78414	5.72717	5.8141	5.79202	6.03601	5.14762	5.46147	5.52184	5.57399	5.59613		OK		7	6	9	8	10	1	2	3	4	5		0	0	0	0	0	0	0	0	0	0		7	6	9	8	10	1	2	3
GB18918	GB49657	FBgn0004606	Zn finger homeodomain 1	Immune system process (GO:0002376)	Immune syst		#N/A	#N/A	#N/A	#N/A	#N/A	#N/A	#N/A	#N/A	#N/A	#N/A		FALSE		FALSE	FALSE	FALSE	FALSE	FALSE	FALSE	FALSE	FALSE	FALSE	FALSE
GB18989	GB42321	FBgn0000543	ecdysoneless	Immune system process (GO:0002376)	Immune syst		8.13596	8.26897	8.07516	8.51242	8.10407	8.85388	8.42353	8.47141	8.19548	8.17204		OK		3	6	1	9	2	10	7	8	5	4		0	0	0	0	0	0	0	0	0	0		3	6	1	9	2	10	7	8
GB19031	GB46056	FBgn0032209	Hand	Immune system process (GO:0002376)	Immune syst		6.29884	6.30911	5.8734	6.47888	5.59187	6.09974	6.41742	5.84675	6.45277	6.56799		OK		5	6	3	9	1	4	7	2	8	10		0	0	0	0	0	0	0	0	0	0		5	6	3	9	1	4	7	2
GB19155	GB49172	FBgn0000541	Enhancer of bithorax	Immune system process (GO:0002376)	Immune syst		9.75825	9.76234	9.30486	9.80266	9.77925	10.2427	9.5811	9.51819	9.64792	9.61853		OK		6	7	1	9	8	10	3	2	5	4		0	0	0	0	0	0	0	0	0	0		6	7	1	9	8	10	3	2
GB19160	GB45689	FBgn0038760	Mediator complex subunit 25	Immune system process (GO:0002376)	Immune syst		9.38872	9.27045	9.00857	9.34158	9.34213	8.47724	9.45573	8.83943	9.28022	9.28077		OK		9	4	3	7	8	1	10	2	5	6		0	0	0	0	0	0	0	0	0	0		9	4	3	7	8	1	10	2
GB19168	GB47837	FBgn0011764	Dorsal switch protein 1	Immune system process (GO:0002376)	Immune syst		10.8832	10.8604	10.8411	10.9682	10.7957	11.2574	10.9961	11.1483	10.7937	10.9455		OK		5	4	3	7	2	10	8	9	1	6		0	0	0	0	0	0	0	0	0	0		5	4	3	7	2	10	8	9
GB19246	GB44931	FBgn0028436	ECSIT	Immune system process (GO:0002376)	Immune syst		8.25869	8.38909	8.27798	8.81228	8.17327	8.6764	8.28668	8.92454	8.35316	8.39551		OK		2	6	3	9	1	8	4	10	5	7		0	0	0	0	0	0	0	0	0	0		2	6	3	9	1	8	4	10
GB19301	GB47805	FBgn0043575	PGRP-SC2	Immune system process (GO:0002376)	Immune syst		5.71831	5.68409	6.6047	6.52544	6.89601	6.98319	6.51147	6.58269	5.55199	6.28349		OK		3	2	8	6	9	10	5	7	1	4		0	0	0	0	0	0	0	0	0	0		3	2	8	6	9	10	5	7
GB19311	GB49159	FBgn0031145	Nuclear transport factor-2	Immune system process (GO:0002376)	Immune syst		9.38699	9.32825	9.44139	9.61609	9.44639	9.31364	9.29044	9.36883	9.30937	9.40018		OK		6	4	8	10	9	3	1	5	2	7		0	0	0	0	0	0	0	0	0	0		6	4	8	10	9	3	1	5
GB19423	GB45127	FBgn0028541	TM9SF4	Immune system process (GO:0002376)	Immune syst		8.76807	8.74349	8.69717	8.78162	8.69632	8.7892	8.46417	8.60636	8.47827	8.74149		OK		8	7	5	9	4	10	1	3	2	6		0	0	0	0	0	0	0	0	0	0		8	7	5	9	4	10	1	3
GB19455	GB43567	FBgn0020377	Scavenger receptor class C, type II	Immune system process (GO:0002376)	Immune syst		5.44603	5.4717	5.12062	4.51477	4.83822	3.89004	4.43549	4.45867	4.63324	4.50264		OK		9	10	8	5	7	1	2	3	6	4		0	0	0	0	0	0	0	0	0	0		9	10	8	5	7	1	2	3
GB19525	GB47743	FBgn0261854	atypical protein kinase C	Immune system process (GO:0002376)	Immune syst		7.76576	7.53897	7.40609	7.93746	8.26488	7.90862	7.84347	7.89005	7.77986	7.66168		OK		4	2	1	9	10	8	6	7	5	3		0	0	0	0	0	0	0	0	0	0		4	2	1	9	10	8	6	7
GB19541	GB47201	FBgn0004657	myospheroid	Immune system process (GO:0002376)	Immune syst		11.197	11.1119	11.0117	11.0397	10.9755	11.3219	10.9396	11.0428	10.949	10.8994		OK		9	8	5	6	4	10	2	7	3	1		0	0	0	0	0	0	0	0	0	0		9	8	5	6	4	10	2	7
GB19783	GB45615	FBgn0029167	Hemolectin	Immune system process (GO:0002376)	Immune syst		#N/A	#N/A	#N/A	#N/A	#N/A	#N/A	#N/A	#N/A	#N/A	#N/A		FALSE		FALSE	FALSE	FALSE	FALSE	FALSE	FALSE	FALSE	FALSE	FALSE	FALSE
GB19857	GB46039	FBgn0003884	alpha-Tubulin at 84B	Immune system process (GO:0002376)	Immune syst		12.4965	12.365	12.7614	12.4732	12.196	11.8652	11.9751	11.5651	12.1519	12.3316		OK		9	7	10	8	5	2	3	1	4	6		0	0	0	0	0	0	0	0	0	0		9	7	10	8	5	2	3	1
GB19881	GB42786	FBgn0027066	Eb1	Immune system process (GO:0002376)	Immune syst		10.8652	10.858	10.7613	10.9481	10.923	11.0345	10.9927	10.8181	10.9308	10.8766		OK		4	3	1	8	6	10	9	2	7	5		0	0	0	0	0	0	0	0	0	0		4	3	1	8	6	10	9	2
GB19884	GB46165	FBgn0010389	heartless	Immune system process (GO:0002376)	Immune syst		7.38924	7.03953	6.63893	7.36689	7.50293	6.96451	7.30068	7.25712	7.77986	7.63407		OK		7	3	1	6	8	2	5	4	10	9		0	0	0	0	0	0	0	0	0	0		7	3	1	6	8	2	5	4
GB19895	GB50933	FBgn0003117	pannier	Immune system process (GO:0002376)	Immune syst		5.44603	5.66204	5.54792	5.20064	5.56406	4.07505	5.11974	5.06711	5.52962	5.57257		OK		5	10	7	4	8	1	3	2	6	9		0	0	0	0	0	0	0	0	0	0		5	10	7	4	8	1	3	2
GB19906	GB45031	FBgn0014179	glial cells missing	Immune system process (GO:0002376)	Immune syst		3.88621	3.95483	4.56389	4.01182	4.30093	3.50654	4.1606	3.42764	4.14197	4.26337		OK		3	4	10	5	9	2	7	1	6	8		0	0	0	0	0	0	0	0	0	0		3	4	10	5	9	2	7	1
GB19961	GB42981	FBgn0040323	Gram-negative bacteria binding protein 1	Immune system process (GO:0002376)	Immune syst		7.65472	7.74357	8.29944	7.83083	7.67196	8.99823	8.00836	8.24338	7.91675	8.54519		OK		1	3	8	4	2	10	6	7	5	9		0	0	0	0	0	0	0	0	0	0		1	3	8	4	2	10	6	7
GB19984	GB45510	FBgn0004009	wingless	Immune system process (GO:0002376)	Immune syst		3.77799	3.95483	3.63819	4.29179	3.94466	3.65661	3.65958	3.56114	4.20844	3.86146		OK		5	8	2	10	7	3	4	1	9	6		0	0	0	0	0	0	0	0	0	0		5	8	2	10	7	3	4	1
GB11057	GB47454	FBgn0015247	Iap2	Imd-Pathway_peptidoglycan recognition protein signaling pathway ; GO:0061057	Imd-Pathway		8.61644	8.61706	8.62677	8.60426	8.53398	8.81542	8.6664	8.93203	8.60649	8.52731		OK		5	6	7	3	2	9	8	10	4	1		0	0	0	0	0	0	0	0	0	0		5	6	7	3	2	9	8	10
GB15371	GB47804	FBgn0037906	PGRP-LB	Imd-Pathway_peptidoglycan recognition protein signaling pathway ; GO:0061057	Imd-Pathway		3.88621	3.95483	3.63819	2.82187	4.13804	2.82187	3.89378	4.41143	4.07096	3.75558		OK		5	7	3	1	9	1	6	10	8	4		0	0	0	0.5	0	0.5	0	0	0	0		5	7	3	1.5	9	1.5	6	10
GB15528	GB44455	FBgn0034647	pirk	Imd-Pathway_peptidoglycan recognition protein signaling pathway ; GO:0061057	Imd-Pathway		#N/A	#N/A	#N/A	#N/A	#N/A	#N/A	#N/A	#N/A	#N/A	#N/A		FALSE		FALSE	FALSE	FALSE	FALSE	FALSE	FALSE	FALSE	FALSE	FALSE	FALSE
GB16425	GB45352	FBgn0020381	Dredd	Imd-Pathway_peptidoglycan recognition protein signaling pathway ; GO:0061057	Imd-Pathway		8.25869	8.43766	8.50276	8.26882	8.04622	9.11684	9.01761	8.97982	8.77621	8.72328		OK		2	4	5	3	1	10	9	8	7	6		0	0	0	0	0	0	0	0	0	0		2	4	5	3	1	10	9	8
GB17188	GB42500	FBgn0035976	PGRP-LC	Imd-Pathway_peptidoglycan recognition protein signaling pathway ; GO:0061057	Imd-Pathway		7.72786	7.78423	8.27798	8.11454	8.15969	8.12546	7.93311	8.0259	7.81193	8.1682		OK		1	2	10	6	8	7	4	5	3	9		0	0	0	0	0	0	0	0	0	0		1	2	10	6	8	7	4	5
GB17514	GB48951	FBgn0034068	casp	Imd-Pathway_peptidoglycan recognition protein signaling pathway ; GO:0061057	Imd-Pathway		8.67448	8.69903	8.67682	8.96704	8.71499	9.12525	8.61618	8.94506	8.63748	8.62021		OK		4	6	5	9	7	10	1	8	3	2		0	0	0	0	0	0	0	0	0	0		4	6	5	9	7	10	1	8
GB18606	GB45648	FBgn0013983	imd	Imd-Pathway_peptidoglycan recognition protein signaling pathway ; GO:0061057	Imd-Pathway		#N/A	#N/A	#N/A	#N/A	#N/A	#N/A	#N/A	#N/A	#N/A	#N/A		FALSE		FALSE	FALSE	FALSE	FALSE	FALSE	FALSE	FALSE	FALSE	FALSE	FALSE
GB14664	GB48187	FBgn0026323	Tak1	Imd-Pathway	Imd-Pathway		9.51	9.6026	9.32592	9.95732	9.56951	10.526	9.69359	9.83334	9.76477	9.62694		OK		2	4	1	9	3	10	6	8	7	5		0	0	0	0	0	0	0	0	0	0		2	4	1	9	3	10	6	8
GB17106	GB49918	not found	IKKgamma-kenny	Imd-Pathway	Imd-Pathway		9.48428	9.61673	9.48885	9.74515	9.47224	10.1155	9.67496	10.0554	9.61587	9.60012		OK		2	6	3	8	1	10	7	9	5	4		0	0	0	0	0	0	0	0	0	0		2	6	3	8	1	10	7	9
GB18650	GB41606	FBgn0086358	Tab	Imd-Pathway	Imd-Pathway		8.39613	8.00236	8.87918	8.3288	8.63552	6.5906	7.89395	7.54346	8.53697	8.38893		OK		7	4	10	5	9	1	3	2	8	6		0	0	0	0	0	0	0	0	0	0		7	4	10	5	9	1	3	2
GB19498	GB45752	FBgn0000173	dUbc13	Imd-Pathway	Imd-Pathway		8.21241	8.28675	8.08755	8.56877	8.46208	9.40453	8.40972	8.69272	8.19548	8.18731		OK		4	5	1	8	7	10	6	9	3	2		0	0	0	0	0	0	0	0	0	0		4	5	1	8	7	10	6	9
GB30399	GB55968	not found		Imd-Pathway	Imd-Pathway		6.68701	6.8795	6.94255	6.58159	6.65836	7.27599	7.12557	6.99555	6.83049	6.78508		OK		3	6	7	1	2	10	9	8	5	4		0	0	0	0	0	0	0	0	0	0		3	6	7	1	2	10	9	8
GB10469	GB52343	FBgn0037107		IG Superfamily Genes	IG Superfam		10.5009	10.4763	10.731	10.5752	10.4989	10.8156	10.5748	10.7344	10.2852	10.2938		OK		5	3	8	7	4	10	6	9	1	2		0	0	0	0	0	0	0	0	0	0		5	3	8	7	4	10	6	9
GB10912	GB53701	not found		IG Superfamily Genes	IG Superfam		6.41312	6.06474	4.63936	4.97523	6.81724	4.59987	4.92983	4.58999	5.48378	4.87289		OK		9	8	3	6	10	2	5	1	7	4		0	0	0	0	0	0	0	0	0	0		9	8	3	6	10	2	5	1
GB11115	GB47239	FBgn0029082		IG Superfamily Genes	IG Superfam		9.02161	9.06531	8.57492	8.60156	8.69945	8.6387	9.00159	8.52692	8.99735	8.91653		OK		9	10	2	3	5	4	8	1	7	6		0	0	0	0	0	0	0	0	0	0		9	10	2	3	5	4	8	1
GB11358	GB55483	FBgn0005666		IG Superfamily Genes	IG Superfam		13.2047	12.9219	13.6817	13.2101	13.663	11.1466	12.5165	12.3842	13.8921	13.5444		OK		5	4	9	6	8	1	3	2	10	7		0	0	0	0	0	0	0	0	0	0		5	4	9	6	8	1	3	2
GB11807	GB53012	FBgn0010473		IG Superfamily Genes	IG Superfam		10.286	10.1471	10.5693	9.16644	10.6244	9.70163	11.4672	10.4348	11.0698	11.4354		OK		4	3	6	1	7	2	10	5	8	9		0	0	0	0	0	0	0	0	0	0		4	3	6	1	7	2	10	5
GB11846	GB44650	FBgn0002968	Neuroglian	IG Superfamily Genes	IG Superfam		10.8009	10.84	10.5199	10.7376	10.6919	11.7076	10.8626	10.8987	10.5725	10.7313		OK		6	7	1	5	3	10	8	9	2	4		0	0	0	0	0	0	0	0	0	0		6	7	1	5	3	10	8	9
GB11918	GB49767	not found		IG Superfamily Genes	IG Superfam		7.55927	7.53301	7.53847	5.95531	7.72826	6.26251	7.90876	6.77078	8.33752	7.78729		OK		6	4	5	1	7	2	9	3	10	8		0	0	0	0	0	0	0	0	0	0		6	4	5	1	7	2	9	3
GB12490	GB53013	FBgn0028482		IG Superfamily Genes	IG Superfam		9.34294	8.80648	10.0753	9.54905	10.1166	6.08238	8.27149	8.14682	9.76009	9.70985		OK		5	4	9	6	10	1	3	2	8	7		0	0	0	0	0	0	0	0	0	0		5	4	9	6	10	1	3	2
GB12933	GB40916	not found		IG Superfamily Genes	IG Superfam		6.60543	6.54155	5.98496	5.62888	6.99131	5.89594	5.86373	5.48054	6.74738	5.59613		OK		8	7	6	3	10	5	4	1	9	2		0	0	0	0	0	0	0	0	0	0		8	7	6	3	10	5	4	1
GB13261	GB44117	FBgn0000547		IG Superfamily Genes	IG Superfam		8.98997	8.67762	9.01507	8.79349	9.04281	7.29105	8.51019	7.66999	9.24712	9.51196		OK		6	4	7	5	8	1	3	2	9	10		0	0	0	0	0	0	0	0	0	0		6	4	7	5	8	1	3	2
GB14317	GB49171	FBgn0021764		IG Superfamily Genes	IG Superfam		7.97894	7.89973	7.61756	7.62281	7.81746	7.40614	7.88898	7.39931	7.70863	7.63964		OK		10	9	3	4	7	2	8	1	6	5		0	0	0	0	0	0	0	0	0	0		10	9	3	4	7	2	8	1
GB14520	GB46360	FBgn0000635		IG Superfamily Genes	IG Superfam		8.77869	8.66408	8.5257	7.70564	8.64853	8.39266	9.33859	8.9432	8.58545	9.27899		OK		7	6	3	1	5	2	10	8	4	9		0	0	0	0	0	0	0	0	0	0		7	6	3	1	5	2	10	8
GB14642	GB47977	FBgn0086906		IG Superfamily Genes	IG Superfam		14.836	14.7575	14.5898	14.396	14.5426	14.2258	14.8643	14.0644	15.3607	15.4459		OK		7	6	5	3	4	2	8	1	9	10		0	0	0	0	0	0	0	0	0	0		7	6	5	3	4	2	8	1
GB15344	GB41645	FBgn0000464		IG Superfamily Genes	IG Superfam		9.37828	9.26328	9.81355	8.86723	10.0059	8.47395	10.2453	9.15013	10.1232	10.3517		OK		5	4	6	2	7	1	9	3	8	10		0	0	0	0	0	0	0	0	0	0		5	4	6	2	7	1	9	3
GB15987	GB45774	FBgn0259141		IG Superfamily Genes	IG Superfam		9.22363	9.0979	8.10594	7.28839	9.30563	7.96596	8.62816	7.74856	8.93429	8.12524		OK		9	8	4	1	10	3	6	2	7	5		0	0	0	0	0	0	0	0	0	0		9	8	4	1	10	3	6	2
GB16060	GB46759	FBgn0037736		IG Superfamily Genes	IG Superfam		5.94589	5.99643	4.96044	4.70239	6.46483	4.70109	6.17576	5.03831	6.14031	5.85151		OK		6	7	3	2	10	1	9	4	8	5		0	0	0	0	0	0	0	0	0	0		6	7	3	2	10	1	9	4
GB30209	GB44159	not found		IG superfamily genes	IG superfam		10.6579	10.3585	10.4569	9.47728	10.7758	8.42027	10.1757	9.69265	11.1386	10.5125		OK		8	5	6	2	9	1	4	3	10	7		0	0	0	0	0	0	0	0	0	0		8	5	6	2	9	1	4	3
GB11717	GB49260	FBgn0061354	CTL1	C-lectin domain	C-lectin do		7.97433	7.56254	7.95855	8.2517	7.70351	6.47624	7.04728	6.77915	8.48396	8.33169		OK		7	4	6	8	5	1	3	2	10	9		0	0	0	0	0	0	0	0	0	0		7	4	6	8	5	1	3	2
GB11792	GB55225	FBgn0001083	CTL6	C-lectin domain	C-lectin do		9.3483	9.26866	8.96895	8.38951	8.59911	7.97064	9.00159	8.43758	10.1672	9.8253		OK		8	7	5	2	4	1	6	3	10	9		0	0	0	0	0	0	0	0	0	0		8	7	5	2	4	1	6	3
GB11810	GB44210	FBgn0037240	CTL10	C-lectin domain	C-lectin do		8.61348	8.683	8.57492	8.46866	8.39801	9.03217	8.71211	8.4217	8.62207	8.93698		OK		5	7	4	3	1	10	8	2	6	9		0	0	0	0	0	0	0	0	0	0		5	7	4	3	1	10	8	2
GB13808	GB43983	FBgn0030617	CTL12	C-lectin domain	C-lectin do		8.42008	8.29381	8.84311	8.45676	9.03292	8.32489	8.57966	9.22373	8.4981	8.3248		OK		4	1	8	5	9	3	7	10	6	2		0	0	0	0	0	0	0	0	0	0		4	1	8	5	9	3	7	10
GB14265	GB45248	FBgn0032180	CTL2	C-lectin domain	C-lectin do		9.13342	9.00643	8.59241	8.01661	8.83369	7.03782	8.18901	7.66999	8.73143	8.10126		OK		10	9	6	3	8	1	5	2	7	4		0	0	0	0	0	0	0	0	0	0		10	9	6	3	8	1	5	2
GB14382	GB51399	FBgn0013997	CTL8	C-lectin domain	C-lectin do		9.6683	9.67324	9.16577	9.47434	9.57633	9.47696	9.39046	9.22373	9.5318	9.50132		OK		9	10	1	4	8	5	3	2	7	6		0	0	0	0	0	0	0	0	0	0		9	10	1	4	8	5	3	2
GB14975	GB52656	FBgn0031629	CTL7	C-lectin domain	C-lectin do		13.2421	13.2263	13.7386	13.3252	13.0468	14.1155	13.6338	13.7927	13.062	13.2238		OK		5	4	8	6	1	10	7	9	2	3		0	0	0	0	0	0	0	0	0	0		5	4	8	6	1	10	7	9
GB15050	GB47095	not found	CTL9	C-lectin domain	C-lectin do		5.78414	5.96099	5.47252	5.69232	5.99536	6.029	6.03748	6.53401	6.23876	6.56799		OK		3	4	1	2	5	6	7	9	8	10		0	0	0	0	0	0	0	0	0	0		3	4	1	2	5	6	7	9
GB17330	GB40445	FBgn0031918	CTL5	C-lectin domain	C-lectin do		11.3816	11.2952	8.86845	9.79205	9.20353	10.4477	10.951	6.96656	11.6978	11.5017		OK		8	7	2	4	3	5	6	1	10	9		0	0	0	0	0	0	0	0	0	0		8	7	2	4	3	5	6	1
GB18049	GB46626	FBgn0035199	CTL3	C-lectin domain	C-lectin do		#N/A	#N/A	#N/A	#N/A	#N/A	#N/A	#N/A	#N/A	#N/A	#N/A		FALSE		FALSE	FALSE	FALSE	FALSE	FALSE	FALSE	FALSE	FALSE	FALSE	FALSE
GB19013	GB43691	FBgn0038017	CTL11	C-lectin domain	C-lectin do		10.6369	10.6851	9.13627	9.58364	9.17908	9.87369	10.2865	9.28792	11.2009	10.9314		OK		7	8	1	4	2	5	6	3	10	9		0	0	0	0	0	0	0	0	0	0		7	8	1	4	2	5	6	3
GB20122	GB47938	FBgn0031879	CTL4	C-lectin domain	C-lectin do		10.6296	10.3678	10.7574	10.5326	10.7238	8.38568	9.76445	9.26733	10.7239	10.7378		OK		6	4	10	5	7	1	3	2	8	9		0	0	0	0	0	0	0	0	0	0		6	4	10	5	7	1	3	2
GB10036	GB47618	FBgn0010385	Defensin-2	Antimicrobial peptide - AMP	Antimicrobi		#N/A	#N/A	#N/A	#N/A	#N/A	#N/A	#N/A	#N/A	#N/A	#N/A		FALSE		FALSE	FALSE	FALSE	FALSE	FALSE	FALSE	FALSE	FALSE	FALSE	FALSE
GB17538	GB51223	not found	Hymenoptaecin	Antimicrobial peptide - AMP	Antimicrobi		5.96486	6.43007	5.51074	5.44391	5.9535	5.81383	5.71193	5.86275	6.40524	5.72967		OK		8	10	2	1	7	5	3	6	9	4		0	0	0	0	0	0	0	0	0	0		8	10	2	1	7	5	3	6
GB17782	GB47546	not found	Apidaecin	Antimicrobial peptide - AMP	Antimicrobi		3.65356	3.48702	4.63936	3.47063	3.94466	2.82187	2.82187	3.42764	3.46087	2.82187		OK		8	7	10	6	9	1	1	4	5	1		0	0	0	0	0	1	1	0	0	1		8	7	10	6	9	2	2	4
GB18323	GB47318	not found	abaecin	Antimicrobial peptide - AMP	Antimicrobi		#N/A	#N/A	#N/A	#N/A	#N/A	#N/A	#N/A	#N/A	#N/A	#N/A		FALSE		FALSE	FALSE	FALSE	FALSE	FALSE	FALSE	FALSE	FALSE	FALSE	FALSE
GB19392	GB41428	FBgn0010385	Defensin-1	Antimicrobial peptide - AMP	Antimicrobi		3.50401	3.29426	3.63819	3.73194	3.33407	2.82187	3.31001	3.7696	2.82187	3.63391		OK		6	3	8	9	5	1	4	10	1	7		0	0	0	0	0	0.5	0	0	0.5	0		6	3	8	9	5	1.5	4	10
GB19468	GB53576	not found	apisimin	Antimicrobial peptide - AMP	Antimicrobi		4.78824	4.94861	5.35102	4.22842	4.50792	4.15604	4.84536	4.5478	5.04765	4.87289		OK		5	8	10	2	3	1	6	4	9	7		0	0	0	0	0	0	0	0	0	0		5	8	10	2	3	1	6	4
GB10896	GB53625	FBgn0051997	Vago	Vago orthologue	Vago orthol		12.9162	12.9415	12.8176	12.431	12.3122	13.1497	12.8319	12.6392	12.8609	12.9404		OK		7	9	4	2	1	10	5	3	6	8		0	0	0	0	0	0	0	0	0	0		7	9	4	2	1	10	5	3
GB12654	GB48208	FBgn0262739	AGO1 argonaute 1	RNAi	RNAi		#N/A	#N/A	#N/A	#N/A	#N/A	#N/A	#N/A	#N/A	#N/A	#N/A		FALSE		FALSE	FALSE	FALSE	FALSE	FALSE	FALSE	FALSE	FALSE	FALSE	FALSE
GB19288	GB48923	FBgn0034246	Dicer-2	RNAi	RNAi		10.8782	10.9316	10.6171	10.4169	10.5826	10.466	10.9504	10.5561	11.0363	10.7103		OK		7	8	5	1	4	2	9	3	10	6		0	0	0	0	0	0	0	0	0	0		7	8	5	1	4	2	9	3
GB19389	GB49909	FBgn0250816	argonaute 3	RNAi	RNAi		#N/A	#N/A	#N/A	#N/A	#N/A	#N/A	#N/A	#N/A	#N/A	#N/A		FALSE		FALSE	FALSE	FALSE	FALSE	FALSE	FALSE	FALSE	FALSE	FALSE	FALSE
[truncated: 15 more columns]

## Sheet: diff expr Varroa+DWV
Apis mellifera putative immune related genes extended list
adapted from: Ryabov EV, Wood GR, Fannon JM, Moore JD, Bull JC, Chandler D, Mead A, Burroughs N, Evans DJ. (2014) A virulent strain of deformed wing virus (DWV) of honeybees (Apis mellifera) prevails after Varroa destructor-mediated, or in vitro, transmission. PLoS Pathog. 2014 Jun 26;10(6):e1004230. doi: 10.1371/journal.ppat.1004230.
note that double entries were excluded from the original list for the sake of the statistical analysis of enriched terms
The details of the statistical analysis are reported in columns S to BM; if you are interested, use the command "format > unhide"
If you want to change the parameters used for filtering data or the significance level go to the spreadsheet "reference parameters"
To see only the significantly differentially expressed genes, use the "filter" in column BN							sample code													statistical analysis (MW U test)
							2	3	4	5	6	12	13	14	15	16				ranks											correction for ties											corrected ranks
							no mite					mite+high virus						filtering		group1					group2						group1					group2						group1					group2
Apis mellifera OGS1 (2008 version)	Apis mellifera OGS3.1 BEEBASE	FBgn ortholog	Gene Product	GO term / Pathway			l26	l28	l30	l34	l35	lv_6 (HI)	lv_9 (HI)	lv_11 (HI)	lv_24 (HI)	lv_31 (HI)				1	2	3	4	5	1	2	3	4	5		1	2	3	4	5	1	2	3	4	5		1	2	3	4	5	1	2	3
GB10023	GB52350	FBgn0036448	myopic	Toll_pathway_Toll signaling pathway ; GO:0008063 and children	Toll_pathwa		5.92666	6.30911	5.65381	6.26197	6.35723	6.66389	6.61964	6.57785	6.47486	2.82187		OK		3	5	2	4	6	10	9	8	7	1		0	0	0	0	0	0	0	0	0	0		3	5	2	4	6	10	9	8
GB10539	GB54845	FBgn0026318	TNF-receptor-associated factor 6	Toll_pathway_Toll signaling pathway ; GO:0008063 and children	Toll_pathwa		6.55663	6.851	6.9288	7.28839	7.39108	7.50979	7.37335	7.50829	7.34297	5.09416		OK		2	3	4	5	8	10	7	9	6	1		0	0	0	0	0	0	0	0	0	0		2	3	4	5	8	10	7	9
GB10655	GB44055	FBgn0000250	cactus	Toll_pathway_Toll signaling pathway ; GO:0008063 and children	Toll_pathwa		6.56899	6.57686	6.53367	6.7672	6.38881	6.84666	6.82464	6.72222	6.17374	2.82187		OK		5	6	4	8	3	10	9	7	2	1		0	0	0	0	0	0	0	0	0	0		5	6	4	8	3	10	9	7
GB11090	GB47167	FBgn0026318	TNF-receptor-associated factor 6	Toll_pathway_Toll signaling pathway ; GO:0008063 and children	Toll_pathwa		#N/A	#N/A	#N/A	#N/A	#N/A	#N/A	#N/A	#N/A	#N/A	#N/A		FALSE		FALSE	FALSE	FALSE	FALSE	FALSE	FALSE	FALSE	FALSE	FALSE	FALSE
GB11883	GB53302	FBgn0000250	cactus	Toll_pathway_Toll signaling pathway ; GO:0008063 and children	Toll_pathwa		7.68329	7.77921	7.26027	7.37956	7.51009	7.66133	7.4645	7.64093	8.33634	5.81283		OK		8	9	2	3	5	7	4	6	10	1		0	0	0	0	0	0	0	0	0	0		8	9	2	3	5	7	4	6
GB12279	GB55279	FBgn0028990	Serpin 27A	Toll_pathway_Toll signaling pathway ; GO:0008063 and children	Toll_pathwa		8.27003	8.11817	7.51111	7.55182	7.77652	8.03223	7.79129	8.14059	8.53485	6.92042		OK		9	7	2	3	4	6	5	8	10	1		0	0	0	0	0	0	0	0	0	0		9	7	2	3	4	6	5	8
GB12344	GB51498	FBgn0033402	Myd88	Toll_pathway_Toll signaling pathway ; GO:0008063 and children	Toll_pathwa		7.87876	7.94526	7.72463	8.05658	8.02641	8.39968	7.78586	8.38965	8.99285	5.09416		OK		4	5	2	7	6	9	3	8	10	1		0	0	0	0	0	0	0	0	0	0		4	5	2	7	6	9	3	8
GB13429	GB47680	FBgn0022787	Helicase 89B	Toll_pathway_Toll signaling pathway ; GO:0008063 and children	Toll_pathwa		9.2021	9.17248	9.05345	8.81228	9.03787	8.6417	8.54205	8.88563	8.45505	9.69755		OK		9	8	7	4	6	3	2	5	1	10		0	0	0	0	0	0	0	0	0	0		9	8	7	4	6	3	2	5
GB13503	GB52103	FBgn0003495	spatzle	Toll_pathway_Toll signaling pathway ; GO:0008063 and children	Toll_pathwa		2.82187	3.29426	3.40289	3.47063	3.54253	3.40863	3.31389	3.4242	3.38939	2.82187		OK		1	3	6	9	10	7	4	8	5	1		0.5	0	0	0	0	0	0	0	0	0.5		1.5	3	6	9	10	7	4	8
GB13520	GB44185	FBgn0000250	cactus	Toll_pathway_Toll signaling pathway ; GO:0008063 and children	Toll_pathwa		9.42467	9.19148	8.4022	9.60401	9.13353	9.5675	9.49834	9.06648	8.96752	9.04869		OK		7	6	1	10	5	9	8	4	2	3		0	0	0	0	0	0	0	0	0	0		7	6	1	10	5	9	8	4
GB13742	GB40654	FBgn0260632	dorsal	Toll_pathway_Toll signaling pathway ; GO:0008063 and children	Toll_pathwa		10.8299	10.8827	11.1751	10.4675	10.7832	10.2365	9.74726	10.4701	11.2871	11.0493		OK		6	7	9	3	5	2	1	4	10	8		0	0	0	0	0	0	0	0	0	0		6	7	9	3	5	2	1	4
GB13922	GB41067	FBgn0010269	Downstream of raf1	Toll_pathway_Toll signaling pathway ; GO:0008063 and children	Toll_pathwa		6.54416	6.40407	5.72016	6.62497	6.78211	7.13614	7.04999	6.90713	7.11919	5.09416		OK		4	3	2	5	6	10	8	7	9	1		0	0	0	0	0	0	0	0	0	0		4	3	2	5	6	10	8	7
GB13935	GB49466	FBgn0261988	G protein-coupled receptor kinase 2	Toll_pathway_Toll signaling pathway ; GO:0008063 and children	Toll_pathwa		5.17427	5.4717	5.35102	5.17069	5.35183	6.04776	6.05607	5.97133	5.69964	5.81283		OK		2	5	3	1	4	9	10	8	6	7		0	0	0	0	0	0	0	0	0	0		2	5	3	1	4	9	10	8
GB14810	GB53713	FBgn0022787	Helicase 89B	Toll_pathway_Toll signaling pathway ; GO:0008063 and children	Toll_pathwa		9.49075	9.50725	9.22302	9.07018	9.1969	9.07827	8.52263	9.23765	9.86386	7.53695		OK		8	9	6	3	5	4	2	7	10	1		0	0	0	0	0	0	0	0	0	0		8	9	6	3	5	4	2	7
GB15273	GB48707	FBgn0024222	immune response deficient 5	Toll_pathway_Toll signaling pathway ; GO:0008063 and children	Toll_pathwa		#N/A	#N/A	#N/A	#N/A	#N/A	#N/A	#N/A	#N/A	#N/A	#N/A		FALSE		FALSE	FALSE	FALSE	FALSE	FALSE	FALSE	FALSE	FALSE	FALSE	FALSE
GB15684	GB51427	FBgn0003882	tube	Toll_pathway_Toll signaling pathway ; GO:0008063 and children	Toll_pathwa		9.81867	9.85582	9.85035	9.62807	9.61164	9.57985	9.02862	9.67073	10.4007	7.35931		OK		7	9	8	5	4	3	2	6	10	1		0	0	0	0	0	0	0	0	0	0		7	9	8	5	4	3	2	6
GB15688	GB52631	FBgn0003495	spatzle	Toll_pathway_Toll signaling pathway ; GO:0008063 and children	Toll_pathwa		7.94632	8.13005	9.11525	8.56601	8.57545	8.64598	8.34235	9.15934	8.91878	7.53695		OK		2	3	9	5	6	7	4	10	8	1		0	0	0	0	0	0	0	0	0	0		2	3	9	5	6	7	4	10
GB15714	GB43157	FBgn0036448	myopic	Toll_pathway_Toll signaling pathway ; GO:0008063 and children	Toll_pathwa		9.90724	10.0061	9.53253	9.36085	9.59662	9.4635	8.9677	9.65067	9.80787	9.53995		OK		9	10	4	2	6	3	1	7	8	5		0	0	0	0	0	0	0	0	0	0		9	10	4	2	6	3	1	7
GB16281	GB45171	FBgn0010602	lesswright	Toll_pathway_Toll signaling pathway ; GO:0008063 and children	Toll_pathwa		9.74341	9.74058	9.7929	9.84205	9.71576	9.45986	9.60681	9.54474	10.0106	9.31513		OK		7	6	8	9	5	2	4	3	10	1		0	0	0	0	0	0	0	0	0	0		7	6	8	9	5	2	4	3
GB16397	GB49344	FBgn0010441	pelle	Toll_pathway_Toll signaling pathway ; GO:0008063 and children	Toll_pathwa		8.37878	8.52417	8.23407	8.29912	8.23066	8.55108	8.33494	8.52319	8.80181	7.69504		OK		6	8	3	4	2	9	5	7	10	1		0	0	0	0	0	0	0	0	0	0		6	8	3	4	2	9	5	7
GB16970	GB44935	FBgn0025574	Pellino	Toll_pathway_Toll signaling pathway ; GO:0008063 and children	Toll_pathwa		9.23332	9.23609	9.55945	9.55464	9.34413	9.24828	9.41479	9.12097	8.17964	10.794		OK		3	4	9	8	6	5	7	2	1	10		0	0	0	0	0	0	0	0	0	0		3	4	9	8	6	5	7	2
GB17879	GB51741	FBgn0030310	Peptidoglycan recognition protein SA	Toll_pathway_Toll signaling pathway ; GO:0008063 and children	Toll_pathwa		7.08925	6.93485	7.31407	7.21246	6.7582	7.6571	7.06801	7.59495	7.78179	6.28431		OK		5	3	7	6	2	9	4	8	10	1		0	0	0	0	0	0	0	0	0	0		5	3	7	6	2	9	4	8
GB18520	GB50418	FBgn0262473	Toll	Toll_pathway_Toll signaling pathway ; GO:0008063 and children	Toll_pathwa		7.64893	7.74357	7.06066	7.44132	7.37548	7.45713	7.71343	8.0951	7.60395	6.92042		OK		7	9	2	4	3	5	8	10	6	1		0	0	0	0	0	0	0	0	0	0		7	9	2	4	3	5	8	10
GB19537	GB44031	FBgn0260632	dorsal	Toll_pathway_Toll signaling pathway ; GO:0008063 and children	Toll_pathwa		10.2971	10.2458	9.74288	9.75611	9.65258	9.99386	9.90429	9.98657	9.80966	10.3943		OK		9	8	2	3	1	7	5	6	4	10		0	0	0	0	0	0	0	0	0	0		9	8	2	3	1	7	5	6
GB10640	GB48399	FBgn0029114	Toll / Tollo	Toll_pathway_Toll signaling pathway ;	Toll_pathwa		3.98284	3.48702	3.96189	4.29179	3.94466	4.15906	3.902	4.06966	2.82187	6.28431		OK		6	2	5	9	4	8	3	7	1	10		0	0	0	0	0	0	0	0	0	0		6	2	5	9	4	8	3	7
GB13677	GB46708	FBgn0031114	cactin	Toll_pathway_Toll signaling pathway ;	Toll_pathwa		7.82337	7.81398	7.60898	7.81226	7.55921	8.0773	7.66697	8.00309	8.05282	7.83748		OK		6	5	2	4	1	10	3	8	9	7		0	0	0	0	0	0	0	0	0	0		6	5	2	4	1	10	3	8
GB14044	GB55007	FBgn0030051	persephone-PSH Serine Protease Immune Response Integrator	Toll_pathway_Toll signaling pathway ;	Toll_pathwa		4.42467	4.98578	5.06936	4.70239	4.83822	4.61804	4.98468	4.49533	3.61945	5.09416		OK		2	8	9	5	6	4	7	3	1	10		0	0	0	0	0	0	0	0	0	0		2	8	9	5	6	4	7	3
GB14609	GB48662	FBgn0004364	Toll	Toll_pathway_Toll signaling pathway ;	Toll_pathwa		#N/A	#N/A	#N/A	#N/A	#N/A	#N/A	#N/A	#N/A	#N/A	#N/A		FALSE		FALSE	FALSE	FALSE	FALSE	FALSE	FALSE	FALSE	FALSE	FALSE	FALSE
GB14720	GB42451	FBgn0086657	Mik2	Toll_pathway_Toll signaling pathway ;	Toll_pathwa		6.94541	6.88888	6.84344	6.90537	6.7461	7.14828	6.79245	6.90713	6.96086	5.81283		OK		8	5	4	6	2	10	3	7	9	1		0	0	0	0	0	0	0	0	0	0		8	5	4	6	2	10	3	7
GB15177	GB43456	FBgn0034476	Toll	Toll_pathway_Toll signaling pathway ;	Toll_pathwa		5.64921	4.87089	5.21757	4.93963	6.41971	5.43372	5.90228	5.40423	3.38939	7.15657		OK		7	2	4	3	9	6	8	5	1	10		0	0	0	0	0	0	0	0	0	0		7	2	4	3	9	6	8	5
GB15606	GB43914	FBgn0024846	0	Toll_pathway_Toll signaling pathway ;	Toll_pathwa		9.13755	9.25608	9.29421	9.2771	9.17459	9.11268	9.04912	9.20744	9.01157	8.29787		OK		5	8	10	9	6	4	3	7	2	1		0	0	0	0	0	0	0	0	0	0		5	8	10	9	6	4	3	7
GB16299	GB48426	FBgn0029114	Toll	Toll_pathway_Toll signaling pathway ;	Toll_pathwa		7.70575	7.5449	7.83168	7.37956	7.92839	7.50035	7.72481	7.46804	7.2086	8.48256		OK		6	5	8	2	9	4	7	3	1	10		0	0	0	0	0	0	0	0	0	0		6	5	8	2	9	4	7	3
GB16472	GB48820	FBgn0028985	NEC LIKE	Toll_pathway_Toll signaling pathway ;	Toll_pathwa		8.81527	8.94505	9.33633	9.31547	8.88408	9.36315	9.6507	9.46656	9.6215	8.64625		OK		2	4	6	5	3	7	10	8	9	1		0	0	0	0	0	0	0	0	0	0		2	4	6	5	3	7	10	8
GB17012	GB46970	not found	NEC LIKE	Toll_pathway_Toll signaling pathway ;	Toll_pathwa		7.25089	7.50286	7.39615	7.07103	7.03171	7.29743	7.26826	7.25974	8.04678	2.82187		OK		4	9	8	3	2	7	6	5	10	1		0	0	0	0	0	0	0	0	0	0		4	9	8	3	2	7	6	5
GB17781	GB48396	FBgn0036494	Toll	Toll_pathway_Toll signaling pathway ;	Toll_pathwa		#N/A	#N/A	#N/A	#N/A	#N/A	#N/A	#N/A	#N/A	#N/A	#N/A		FALSE		FALSE	FALSE	FALSE	FALSE	FALSE	FALSE	FALSE	FALSE	FALSE	FALSE
GB17927	GB49441	FBgn0003450	Toll-Pathway_persephone-Serine protease--Extracellular-cSP10	Toll_pathway_Toll signaling pathway ;	Toll_pathwa		6.89732	7.22844	8.08136	7.72562	7.92304	7.89151	7.61896	7.88584	7.47488	8.98894		OK		1	2	9	5	8	7	4	6	3	10		0	0	0	0	0	0	0	0	0	0		1	2	9	5	8	7	4	6
GB17936	GB55933	FBgn0039532		Toll_pathway_Toll signaling pathway ;	Toll_pathwa		5.96486	5.74822	5.21757	5.92063	5.9535	6.51197	6.09204	6.24812	5.56822	5.09416		OK		7	4	2	5	6	10	8	9	3	1		0	0	0	0	0	0	0	0	0	0		7	4	2	5	6	10	8	9
GB17961	GB41158	not found	Tollip	Toll_pathway_Toll signaling pathway ;	Toll_pathwa		8.46353	8.55384	8.417	8.59343	8.49488	8.63526	8.71742	8.81327	8.50434	8.19582		OK		3	6	2	7	4	8	9	10	5	1		0	0	0	0	0	0	0	0	0	0		3	6	2	7	4	8	9	10
GB17975	GB40699	FBgn0029114	Tollo	Toll_pathway_Toll signaling pathway ;	Toll_pathwa		#N/A	#N/A	#N/A	#N/A	#N/A	#N/A	#N/A	#N/A	#N/A	#N/A		FALSE		FALSE	FALSE	FALSE	FALSE	FALSE	FALSE	FALSE	FALSE	FALSE	FALSE
GB18032	GB42472	not found	dorsal	Toll_pathway_Toll signaling pathway ;	Toll_pathwa		4.64544	4.74469	5.51074	5.07657	5.31862	4.36521	4.85934	5.31364	4.5271	5.81283		OK		3	4	9	6	8	1	5	7	2	10		0	0	0	0	0	0	0	0	0	0		3	4	9	6	8	1	5	7
GB19066	GB44032	not found	dorsal	Toll_pathway_Toll signaling pathway ;	Toll_pathwa		#N/A	#N/A	#N/A	#N/A	#N/A	#N/A	#N/A	#N/A	#N/A	#N/A		FALSE		FALSE	FALSE	FALSE	FALSE	FALSE	FALSE	FALSE	FALSE	FALSE	FALSE
GB19582	GB54611	FBgn0028984	NEC-like	Toll_pathway_Toll signaling pathway ;	Toll_pathwa		10.7839	10.6905	11.1866	10.9481	10.9652	11.7726	12.0977	11.7956	10.7132	12.9897		OK		3	1	6	4	5	7	9	8	2	10		0	0	0	0	0	0	0	0	0	0		3	1	6	4	5	7	9	8
GB11563	GB45417	FBgn0041182	TEPB	TEP - Thioester-containing protein	TEP - Thioe		10.2654	10.3089	10.2794	9.8523	10.0906	9.84276	9.6492	10.1918	10.3403	10.5051		OK		6	8	7	3	4	2	1	5	9	10		0	0	0	0	0	0	0	0	0	0		6	8	7	3	4	2	1	5
GB12605	GB42455	FBgn0041182	TEP7	TEP - Thioester-containing protein	TEP - Thioe		11.2862	11.2176	10.6383	10.1046	11.1719	9.85851	10.0806	10.387	10.5532	12.0878		OK		9	8	6	3	7	1	2	4	5	10		0	0	0	0	0	0	0	0	0	0		9	8	6	3	7	1	2	4
GB18789	GB48204	FBgn0020240	TEPA	TEP - Thioester-containing protein	TEP - Thioe		7.02809	7.18349	6.75267	7.34119	7.26978	7.64431	7.41614	7.64995	6.85395	7.15657		OK		3	5	1	7	6	9	8	10	2	4		0	0	0	0	0	0	0	0	0	0		3	5	1	7	6	9	8	10
GB10222	GB41097	not found	SP18	serine proteases	serine prot		#N/A	#N/A	#N/A	#N/A	#N/A	#N/A	#N/A	#N/A	#N/A	#N/A		FALSE		FALSE	FALSE	FALSE	FALSE	FALSE	FALSE	FALSE	FALSE	FALSE	FALSE
GB10646	GB41409	FBgn0036436	SP4	serine proteases	serine prot		#N/A	#N/A	#N/A	#N/A	#N/A	#N/A	#N/A	#N/A	#N/A	#N/A		FALSE		FALSE	FALSE	FALSE	FALSE	FALSE	FALSE	FALSE	FALSE	FALSE	FALSE
GB10758	GB44146	FBgn0034709	0	serine proteases	serine prot		10.5097	10.2558	12.8106	12.3189	12.287	11.6721	12.5883	12.2683	10.1731	13.7142		OK		3	2	9	7	6	4	8	5	1	10		0	0	0	0	0	0	0	0	0	0		3	2	9	7	6	4	8	5
GB10943	GB49946	FBgn0011653	cSPH41	serine proteases	serine prot		5.41839	5.25058	4.90237	6.00578	5.64587	6.49299	6.58242	6.61533	5.69964	5.81283		OK		3	2	1	7	4	8	9	10	5	6		0	0	0	0	0	0	0	0	0	0		3	2	1	7	4	8	9	10
GB11297	GB47402	not found	SP31	serine proteases	serine prot		#N/A	#N/A	#N/A	#N/A	#N/A	#N/A	#N/A	#N/A	#N/A	#N/A		FALSE		FALSE	FALSE	FALSE	FALSE	FALSE	FALSE	FALSE	FALSE	FALSE	FALSE
GB11298	GB52598	FBgn0032213	cSPH42	serine proteases	serine prot		#N/A	#N/A	#N/A	#N/A	#N/A	#N/A	#N/A	#N/A	#N/A	#N/A		FALSE		FALSE	FALSE	FALSE	FALSE	FALSE	FALSE	FALSE	FALSE	FALSE	FALSE
GB11511	GB40138	not found	SP32	serine proteases	serine prot		#N/A	#N/A	#N/A	#N/A	#N/A	#N/A	#N/A	#N/A	#N/A	#N/A		FALSE		FALSE	FALSE	FALSE	FALSE	FALSE	FALSE	FALSE	FALSE	FALSE	FALSE
GB11552	GB48510	not found	SP34	serine proteases	serine prot		2.82187	2.82187	4.71045	3.73194	3.94466	3.64614	3.31389	3.85079	3.61945	2.82187		OK		1	1	10	7	9	6	4	8	5	1		1	1	0	0	0	0	0	0	0	1		2	2	10	7	9	6	4	8
GB11588	GB50026	not found	SP27	serine proteases	serine prot		8.90284	8.4535	9.21175	8.5324	8.49488	7.44734	6.6678	6.51971	5.84818	11.3034		OK		8	5	9	7	6	4	3	2	1	10		0	0	0	0	0	0	0	0	0	0		8	5	9	7	6	4	3	2
GB11698	GB49552	not found	cSP3	serine proteases	serine prot		7.10626	6.95284	8.48414	7.97131	7.67196	7.30287	7.45085	7.54262	6.62904	8.08599		OK		3	2	10	8	7	4	5	6	1	9		0	0	0	0	0	0	0	0	0	0		3	2	10	8	7	4	5	6
GB12253	GB50586	FBgn0003319	SP16	serine proteases	serine prot		8.78924	8.52716	8.61398	8.2517	8.97469	8.37153	8.87631	7.96023	7.02384	10.7587		OK		7	5	6	3	9	4	8	2	1	10		0	0	0	0	0	0	0	0	0	0		7	5	6	3	9	4	8	2
GB12300	GB41399	FBgn0042098	SP5	serine proteases	serine prot		4.22632	4.32651	4.08877	4.16112	4.04604	4.41132	4.31746	4.45012	4.17125	5.09416		OK		5	7	2	3	1	8	6	9	4	10		0	0	0	0	0	0	0	0	0	0		5	7	2	3	1	8	6	9
GB12379	GB54517	not found	SP48	serine proteases	serine prot		3.65356	3.95483	2.82187	3.28253	3.33407	3.74043	3.5144	3.4242	3.79276	2.82187		OK		7	10	1	3	4	8	6	5	9	1		0	0	0.5	0	0	0	0	0	0	0.5		7	10	1.5	3	4	8	6	5
GB13019	GB54775	FBgn0030027	SPH56	serine proteases	serine prot		9.87172	9.78253	9.98387	10.0283	10.4579	9.613	9.86885	9.55437	9.00536	11.6408		OK		6	4	7	8	9	3	5	2	1	10		0	0	0	0	0	0	0	0	0	0		6	4	7	8	9	3	5	2
GB13263	GB52185	not found	SP40	serine proteases	serine prot		5.78414	5.7058	6.76821	5.90297	5.99536	5.11418	5.4219	5.08436	4.73746	8.86146		OK		6	5	9	7	8	3	4	2	1	10		0	0	0	0	0	0	0	0	0	0		6	5	9	7	8	3	4	2
GB13397	GB41410	not found	SPH51	serine proteases	serine prot		5.69565	5.4717	5.26354	5.31418	5.59187	5.16474	5.09902	5.26596	4.91746	6.63751		OK		9	7	4	6	8	3	2	5	1	10		0	0	0	0	0	0	0	0	0	0		9	7	4	6	8	3	2	5
GB13489	GB44120	FBgn0050375	SP28	serine proteases	serine prot		4.15136	3.75456	6.45891	5.36756	5.93209	5.34986	5.30186	5.16523	3.93632	2.82187		OK		4	2	10	8	9	7	6	5	3	1		0	0	0	0	0	0	0	0	0	0		4	2	10	8	9	7	6	5
GB13791	GB48079	FBgn0015316	SP22	serine proteases	serine prot		2.82187	3.29426	4.56389	3.47063	3.54253	2.82187	2.82187	2.82187	3.38939	2.82187		OK		1	6	10	8	9	1	1	1	7	1		2	0	0	0	0	2	2	2	0	2		3	6	10	8	9	3	3	3
GB14001	GB53354	FBgn0032402	cSPH50	serine proteases	serine prot		4.36235	4.50093	4.71045	4.16112	3.83097	4.57945	4.24651	4.19261	3.79276	5.09416		OK		6	7	9	3	2	8	5	4	1	10		0	0	0	0	0	0	0	0	0	0		6	7	9	3	2	8	5	4
GB14077	GB54762	FBgn0033362	cSP6	serine proteases	serine prot		8.01983	8.00666	6.43959	6.61425	6.30849	7.00872	7.32925	7.06414	6.62904	8.86146		OK		9	8	2	3	1	5	7	6	4	10		0	0	0	0	0	0	0	0	0	0		9	8	2	3	1	5	7	6
GB14233	GB51631	not found	SP24	serine proteases	serine prot		5.06992	5.41969	9.56167	6.91412	8.04622	4.79471	5.17011	6.10991	4.44797	7.35931		OK		3	5	10	7	9	2	4	6	1	8		0	0	0	0	0	0	0	0	0	0		3	5	10	7	9	2	4	6
GB14247	GB45700	FBgn0000533	cSP2	serine proteases	serine prot		8.91251	8.88795	10.1362	9.17008	9.21232	10.575	10.4332	10.3494	8.1961	10.8285		OK		3	2	6	4	5	9	8	7	1	10		0	0	0	0	0	0	0	0	0	0		3	2	6	4	5	9	8	7
GB14309	GB50650	not found	cSP33	serine proteases	serine prot		5.36136	4.94861	5.75218	4.93963	5.4159	5.03451	5.86105	5.31364	4.73746	7.83748		OK		6	3	8	2	7	4	9	5	1	10		0	0	0	0	0	0	0	0	0	0		6	3	8	2	7	4	9	5
GB14366	GB52597	not found	cSPH39	serine proteases	serine prot		10.5435	10.5606	11.3922	10.8459	10.6809	10.8475	11.1939	11.0743	9.94721	12.0445		OK		2	3	9	5	4	6	8	7	1	10		0	0	0	0	0	0	0	0	0	0		2	3	9	5	4	6	8	7
GB14603	GB40137	FBgn0026250	SP17	serine proteases	serine prot		6.80649	6.93485	6.40015	7.26124	6.37311	4.69174	4.98468	4.19261	5.02485	9.10606		OK		7	8	6	9	5	2	3	1	4	10		0	0	0	0	0	0	0	0	0	0		7	8	6	9	5	2	3	1
GB14644	GB41407	not found	SP29	serine proteases	serine prot		#N/A	#N/A	#N/A	#N/A	#N/A	#N/A	#N/A	#N/A	#N/A	#N/A		FALSE		FALSE	FALSE	FALSE	FALSE	FALSE	FALSE	FALSE	FALSE	FALSE	FALSE
GB14654	GB41408	FBgn0039272	SP11	serine proteases	serine prot		4.83245	4.38763	4.84156	4.65811	4.7889	4.15906	4.44723	4.2491	4.67126	6.28431		OK		8	3	9	5	7	1	4	2	6	10		0	0	0	0	0	0	0	0	0	0		8	3	9	5	7	1	4	2
GB14774	GB48081	not found	SP47	serine proteases	serine prot		3.65356	3.86033	3.63819	2.82187	3.83097	3.74043	3.79229	3.92953	3.61945	5.81283		OK		4	8	3	1	7	5	6	9	2	10		0	0	0	0	0	0	0	0	0	0		4	8	3	1	7	5	6	9
GB15254	GB50290	not found	cSPH55	serine proteases	serine prot		5.33192	5.4717	6.55176	6.26197	5.81987	6.6121	6.71439	6.48973	5.30287	8.92661		OK		2	3	7	5	4	8	9	6	1	10		0	0	0	0	0	0	0	0	0	0		2	3	7	5	4	8	9	6
GB15317	GB52191	FBgn0051217	SP49	serine proteases	serine prot		7.48977	7.50286	8.03092	7.70564	7.42934	7.81373	7.75843	8.24245	7.86652	7.83748		OK		2	3	9	4	1	6	5	10	8	7		0	0	0	0	0	0	0	0	0	0		2	3	9	4	1	6	5	10
GB15453	GB47933	not found	SP44	serine proteases	serine prot		6.41312	6.28077	7.3454	6.40604	6.25803	5.16474	4.8147	4.99821	5.42295	7.15657		OK		8	6	10	7	5	3	1	2	4	9		0	0	0	0	0	0	0	0	0	0		8	6	10	7	5	3	1	2
GB15640	GB50164	not found	SP13	serine proteases	serine prot		8.91733	8.98699	8.72914	8.99404	8.87303	8.63095	8.78689	8.81927	8.86834	7.96709		OK		8	9	3	10	7	2	4	5	6	1		0	0	0	0	0	0	0	0	0	0		8	9	3	10	7	2	4	5
GB15702	GB48471	not found	SPH53	serine proteases	serine prot		#N/A	#N/A	#N/A	#N/A	#N/A	#N/A	#N/A	#N/A	#N/A	#N/A		FALSE		FALSE	FALSE	FALSE	FALSE	FALSE	FALSE	FALSE	FALSE	FALSE	FALSE
GB15980	GB42804	not found	SPH54	serine proteases	serine prot		10.4791	10.3219	9.6768	9.68142	10.1107	10.2251	9.95345	10.1166	9.58657	13.0748		OK		9	8	2	3	5	7	4	6	1	10		0	0	0	0	0	0	0	0	0	0		9	8	2	3	5	7	4	6
GB16021	GB45565	FBgn0038481	SP35	serine proteases	serine prot		8.09403	8.05314	9.35182	8.37062	7.94959	6.1487	6.19473	6.32954	7.66044	8.98894		OK		7	6	10	8	5	1	2	3	4	9		0	0	0	0	0	0	0	0	0	0		7	6	10	8	5	1	2	3
GB16038	GB48080	not found	SPH57	serine proteases	serine prot		#N/A	#N/A	#N/A	#N/A	#N/A	#N/A	#N/A	#N/A	#N/A	#N/A		FALSE		FALSE	FALSE	FALSE	FALSE	FALSE	FALSE	FALSE	FALSE	FALSE	FALSE
GB16147	GB45701	FBgn0027930	cSP1	serine proteases	serine prot		8.09403	8.14962	8.68091	8.46272	8.23498	8.82077	8.51282	8.69197	8.67841	7.96709		OK		2	3	8	5	4	10	6	9	7	1		0	0	0	0	0	0	0	0	0	0		2	3	8	5	4	10	6	9
GB16214	GB56027	FBgn0036287	SP38	serine proteases	serine prot		5.80541	5.52181	6.79878	6.00578	6.47956	6.53071	6.32101	6.47959	5.21647	7.53695		OK		3	2	9	4	6	8	5	7	1	10		0	0	0	0	0	0	0	0	0	0		3	2	9	4	6	8	5	7
GB16220	GB44149	FBgn0038727	cSP21	serine proteases	serine prot		8.19665	8.08195	7.14624	6.90537	6.90692	7.45713	7.33669	6.92958	6.21778	9.80539		OK		9	8	5	2	3	7	6	4	1	10		0	0	0	0	0	0	0	0	0	0		9	8	5	2	3	7	6	4
GB16367	GB40831	FBgn0038211	SP46	serine proteases	serine prot		4.22632	4.11976	4.63936	3.92777	4.37415	3.97273	3.31389	4.00212	3.61945	5.81283		OK		7	6	9	3	8	4	1	5	2	10		0	0	0	0	0	0	0	0	0	0		7	6	9	3	8	4	1	5
GB17145	GB46726	FBgn0051728	cSP7	serine proteases	serine prot		3.65356	3.63301	3.40289	3.47063	3.70007	3.23819	3.31389	3.76433	2.82187	2.82187		OK		8	7	5	6	9	3	4	10	1	1		0	0	0	0	0	0	0	0	0.5	0.5		8	7	5	6	9	3	4	10
GB17345	GB41710	FBgn0036612	SPH19	serine proteases	serine prot		9.50041	9.58546	7.74825	9.71551	9.1149	10.1992	9.88794	9.85053	8.71693	13.8959		OK		4	5	1	6	3	9	8	7	2	10		0	0	0	0	0	0	0	0	0	0		4	5	1	6	3	9	8	7
GB17654	GB43369	not found	SP45	serine proteases	serine prot		5.76254	5.44594	7.14624	6.27569	6.89601	6.03462	6.72581	6.32954	4.91746	7.69504		OK		3	2	9	5	8	4	7	6	1	10		0	0	0	0	0	0	0	0	0	0		3	2	9	5	8	4	7	6
GB18178	GB41178	FBgn0038447	SP15	serine proteases	serine prot		4.48382	4.44565	4.56389	4.35173	4.30093	4.45565	4.56399	4.35407	4.44797	2.82187		OK		8	5	9	3	2	7	10	4	6	1		0	0	0	0	0	0	0	0	0	0		8	5	9	3	2	7	10	4
GB18450	GB52706	FBgn0033365	cSP26	serine proteases	serine prot		5.30183	4.78817	3.63819	4.08921	3.33407	3.74043	4.50704	3.76433	3.38939	8.19582		OK		9	8	3	6	1	4	7	5	2	10		0	0	0	0	0	0	0	0	0	0		9	8	3	6	1	4	7	5
GB18530	GB50314	not found	SP43	serine proteases	serine prot		#N/A	#N/A	#N/A	#N/A	#N/A	#N/A	#N/A	#N/A	#N/A	#N/A		FALSE		FALSE	FALSE	FALSE	FALSE	FALSE	FALSE	FALSE	FALSE	FALSE	FALSE
GB18944	GB46203	FBgn0037627	SPH37	serine proteases	serine prot		5.86735	5.80953	5.8734	5.62888	5.6721	5.98079	5.60956	5.80123	5.4975	6.92042		OK		7	6	8	3	4	9	2	5	1	10		0	0	0	0	0	0	0	0	0	0		7	6	8	3	4	9	2	5
GB19292	GB45336	not found	SPH52	serine proteases	serine prot		4.78824	4.94861	4.30354	3.83535	4.7889	4.15906	4.31746	4.2491	5.02485	2.82187		OK		7	9	5	2	8	3	6	4	10	1		0	0	0	0	0	0	0	0	0	0		7	9	5	2	8	3	6	4
GB19590	GB40567	FBgn0002926	SP20	serine proteases	serine prot		7.40991	7.14493	8.21726	7.40459	7.5933	7.02199	6.89705	6.94435	5.42295	10.3236		OK		7	5	9	6	8	4	2	3	1	10		0	0	0	0	0	0	0	0	0	0		7	5	9	6	8	4	2	3
GB19719	GB50648	FBgn0085379	cSP25	serine proteases	serine prot		4.36235	4.32651	2.82187	3.28253	3.83097	3.53808	3.31389	3.55697	3.93632	5.09416		OK		9	8	1	2	6	4	3	5	7	10		0	0	0	0	0	0	0	0	0	0		9	8	1	2	6	4	3	5
GB19846	GB50761	FBgn0038485	SP36	serine proteases	serine prot		8.5057	8.3692	8.47944	8.5493	7.43687	6.4834	7.2526	6.13606	6.82593	9.10606		OK		8	6	7	9	5	2	4	1	3	10		0	0	0	0	0	0	0	0	0	0		8	6	7	9	5	2	4	1
GB19856	GB40926	FBgn0051265	SP12	serine proteases	serine prot		#N/A	#N/A	#N/A	#N/A	#N/A	#N/A	#N/A	#N/A	#N/A	#N/A		FALSE		FALSE	FALSE	FALSE	FALSE	FALSE	FALSE	FALSE	FALSE	FALSE	FALSE
GB10506	GB52097	FBgn0058006	AmSCR-B1	Scav. Receptor A	Scav. Recep		5.96486	6.20735	6.01152	6.17675	6.09487	7.30287	6.99453	6.90713	6.28137	2.82187		OK		2	6	3	5	4	10	9	8	7	1		0	0	0	0	0	0	0	0	0	0		2	6	3	5	4	10	9	8
GB11743	GB45986	FBgn0035290	AmSCR-B2	Scav. Receptor A	Scav. Recep		12.055	11.9018	12.0619	11.7083	11.9786	12.3783	12.1934	12.8197	10.6697	12.6995		OK		5	3	6	2	4	8	7	10	1	9		0	0	0	0	0	0	0	0	0	0		5	3	6	2	4	8	7	10
GB12378	GB50865	not found	AmSCR-B3	Scav. Receptor A	Scav. Recep		#N/A	#N/A	#N/A	#N/A	#N/A	#N/A	#N/A	#N/A	#N/A	#N/A		FALSE		FALSE	FALSE	FALSE	FALSE	FALSE	FALSE	FALSE	FALSE	FALSE	FALSE
GB12538	GB50482	FBgn0023479	GRAAL/Tequila-like	Scav. Receptor A	Scav. Recep		9.51318	9.48432	9.88446	9.59182	9.85837	9.87227	9.95707	10.3342	8.6862	10.8622		OK		3	2	7	4	5	6	8	9	1	10		0	0	0	0	0	0	0	0	0	0		3	2	7	4	5	6	8	9
GB12830	GB50454	not found	AmSCR-B4	Scav. Receptor A	Scav. Recep		4.29641	4.11976	3.63819	4.08921	3.54253	4.03877	4.08885	3.55697	3.93632	2.82187		OK		10	9	4	8	2	6	7	3	5	1		0	0	0	0	0	0	0	0	0	0		10	9	4	8	2	6	7	3
GB13360	GB49476	FBgn0034660	lox2-like	Scav. Receptor A	Scav. Recep		6.61737	6.61131	6.98301	6.69786	6.88502	6.29876	6.60734	5.8655	5.60227	9.10606		OK		6	5	9	7	8	3	4	2	1	10		0	0	0	0	0	0	0	0	0	0		6	5	9	7	8	3	4	2
GB13813	GB49363	FBgn0027562	AmSCR-B5	Scav. Receptor A	Scav. Recep		7.91294	7.87642	7.97865	7.8537	7.39881	7.9446	8.2897	7.77066	8.14614	8.19582		OK		5	4	7	3	1	6	10	2	8	9		0	0	0	0	0	0	0	0	0	0		5	4	7	3	1	6	10	2
GB14314	GB53014	not found	AmSCR-B6	Scav. Receptor A	Scav. Recep		8.40986	8.1261	8.26713	8.04867	8.64204	7.91653	7.8754	7.97107	7.50163	10.0876		OK		8	6	7	5	9	3	2	4	1	10		0	0	0	0	0	0	0	0	0	0		8	6	7	5	9	3	2	4
GB15549	GB48343	not found	AmSCR-B7	Scav. Receptor A	Scav. Recep		6.17454	6.35058	6.63893	6.50235	6.7461	6.23147	6.38017	6.32954	5.84818	6.63751		OK		2	5	9	7	10	3	6	4	1	8		0	0	0	0	0	0	0	0	0	0		2	5	9	7	10	3	6	4
GB16388	GB40306	not found	AmSCR-B8	Scav. Receptor A	Scav. Recep		#N/A	#N/A	#N/A	#N/A	#N/A	#N/A	#N/A	#N/A	#N/A	#N/A		FALSE		FALSE	FALSE	FALSE	FALSE	FALSE	FALSE	FALSE	FALSE	FALSE	FALSE
GB19649	GB54246	FBgn0033192	Corin-like	Scav. Receptor A	Scav. Recep		6.58124	6.25186	6.49678	5.92063	6.79392	6.42448	6.51814	6.44874	5.4975	7.83748		OK		8	3	6	2	9	4	7	5	1	10		0	0	0	0	0	0	0	0	0	0		8	3	6	2	9	4	7	5
GB19683	GB50866	FBgn0010435	AmSCR-B10	Scav. Receptor A	Scav. Recep		10.4936	10.2791	11.3297	10.6632	11.0607	10.3608	10.6955	10.3897	9.7863	12.0591		OK		5	2	9	6	8	3	7	4	1	10		0	0	0	0	0	0	0	0	0	0		5	2	9	6	8	3	7	4
GB19916	GB44045	FBgn0015924	AmSCR-B9	Scav. Receptor A	Scav. Recep		9.06565	9.11592	9.46294	9.37356	9.0841	9.84741	9.41304	9.53869	9.47189	7.15657		OK		2	4	7	5	3	10	6	9	8	1		0	0	0	0	0	0	0	0	0	0		2	4	7	5	3	10	6	9
GB19925	GB54506	FBgn0014033	AmSCR-C	Scav. Receptor A	Scav. Recep		7.04583	6.90744	7.77149	7.81693	7.87399	7.38207	7.42315	7.5714	6.1512	9.45418		OK		3	2	7	8	9	4	5	6	1	10		0	0	0	0	0	0	0	0	0	0		3	2	7	8	9	4	5	6
GB18313	GB43738	FBgn0033367	PPO	PPO - melanization	PPO - melan		8.19665	8.1102	8.50276	7.89839	8.30242	8.26428	8.89153	8.54992	7.66044	8.79323		OK		4	3	7	2	6	5	10	8	1	9		0	0	0	0	0	0	0	0	0	0		4	3	7	2	6	5	10	8
GB18767	GB50013	FBgn0036891	PPOAct	PPO - melanization	PPO - melan		8.54978	8.35241	9.93673	8.90274	9.42953	8.5782	8.54526	9.14666	6.00783	10.5677		OK		4	2	9	6	8	5	3	7	1	10		0	0	0	0	0	0	0	0	0	0		4	2	9	6	8	5	3	7
GB10231	GB40163	FBgn0034539	CG11159	Lysozyme	Lysozyme		#N/A	#N/A	#N/A	#N/A	#N/A	#N/A	#N/A	#N/A	#N/A	#N/A		FALSE		FALSE	FALSE	FALSE	FALSE	FALSE	FALSE	FALSE	FALSE	FALSE	FALSE
GB19988	GB47104	FBgn0025827		Lysozyme	Lysozyme		7.92255	7.92268	8.51198	8.31568	7.86286	8.12407	7.96451	8.14697	7.85274	9.31513		OK		3	4	9	8	2	6	5	7	1	10		0	0	0	0	0	0	0	0	0	0		3	4	9	8	2	6	5	7
GB10567	GB49149	FBgn0004647	Notch	JNK cascade ; GO:0007254	JNK cascade		7.01012	6.99684	6.63893	6.74773	7.17383	7.20168	7.58187	7.20564	7.2513	8.64625		OK		4	3	1	2	5	6	9	7	8	10		0	0	0	0	0	0	0	0	0	0		4	3	1	2	5	6	9	7
GB11373	GB45558	FBgn0010333	Rac1	JNK cascade ; GO:0007254	JNK cascade		11.1935	11.2851	11.4412	11.5989	11.3287	11.3038	11.491	11.3865	11.44	10.3475		OK		2	3	8	10	5	4	9	6	7	1		0	0	0	0	0	0	0	0	0	0		2	3	8	10	5	4	9	6
GB11819	GB47961	FBgn0024329	Mekk1	JNK cascade ; GO:0007254	JNK cascade		7.44373	7.42138	7.20439	6.50235	6.97067	6.70565	6.32101	7.04371	7.5622	6.28431		OK		9	8	7	3	5	4	2	6	10	1		0	0	0	0	0	0	0	0	0	0		9	8	7	3	5	4	2	6
gb12004	GB53318	FBgn0001291	Jun-related antigen	JNK cascade ; GO:0007254	JNK cascade		#N/A	#N/A	#N/A	#N/A	#N/A	#N/A	#N/A	#N/A	#N/A	#N/A		FALSE		FALSE	FALSE	FALSE	FALSE	FALSE	FALSE	FALSE	FALSE	FALSE	FALSE
GB12212	GB42049	FBgn0001297	kayak	JNK cascade ; GO:0007254	JNK cascade		#N/A	#N/A	#N/A	#N/A	#N/A	#N/A	#N/A	#N/A	#N/A	#N/A		FALSE		FALSE	FALSE	FALSE	FALSE	FALSE	FALSE	FALSE	FALSE	FALSE	FALSE
GB12587	GB49368	FBgn0014011	Rac2	JNK cascade ; GO:0007254	JNK cascade		6.35713	6.22234	5.72016	6.08607	6.22336	6.88348	6.72581	6.7645	6.28137	6.63751		OK		6	3	1	2	4	10	8	9	5	7		0	0	0	0	0	0	0	0	0	0		6	3	1	2	4	10	8	9
GB12838	GB43176	FBgn0015286	Ras-related protein	JNK cascade ; GO:0007254	JNK cascade		#N/A	#N/A	#N/A	#N/A	#N/A	#N/A	#N/A	#N/A	#N/A	#N/A		FALSE		FALSE	FALSE	FALSE	FALSE	FALSE	FALSE	FALSE	FALSE	FALSE	FALSE
GB13135	GB47431	FBgn0014020	Rho1	JNK cascade ; GO:0007254	JNK cascade		9.8655	9.85463	10.0471	10.3389	10.0335	10.2887	10.5938	10.3159	9.4354	9.93768		OK		3	2	6	9	5	7	10	8	1	4		0	0	0	0	0	0	0	0	0	0		3	2	6	9	5	7	10	8
GB14469	GB44237	FBgn0004636	Roughened	JNK cascade ; GO:0007254	JNK cascade		9.71051	9.61109	10.3167	9.95204	10.2399	11.0684	11.2322	10.5028	11.3716	11.6601		OK		2	1	5	3	4	7	8	6	9	10		0	0	0	0	0	0	0	0	0	0		2	1	5	3	4	7	8	6
GB14925	GB50631	FBgn0010341	Cdc42	JNK cascade ; GO:0007254	JNK cascade		8.86844	8.70433	9.02153	8.91366	8.75766	8.67558	8.91157	8.73919	8.58153	7.69504		OK		7	4	10	9	6	3	8	5	2	1		0	0	0	0	0	0	0	0	0	0		7	4	10	9	6	3	8	5
GB15424	GB53394	FBgn0003371	shaggy	JNK cascade ; GO:0007254	JNK cascade		10.7478	10.7861	10.4711	10.6535	10.5518	11.1065	11.287	10.6897	11.0686	10.794		OK		5	6	1	3	2	9	10	4	8	7		0	0	0	0	0	0	0	0	0	0		5	6	1	3	2	9	10	4
GB16401	GB56012	FBgn0000229	basket	JNK cascade ; GO:0007254	JNK cascade		7.81823	7.56254	8.58369	8.14081	8.63552	8.32692	8.7344	8.22747	6.86776	10.6471		OK		3	2	7	4	8	6	9	5	1	10		0	0	0	0	0	0	0	0	0	0		3	2	7	4	8	6	9	5
GB16764	GB44888	FBgn0033483	eiger	JNK cascade ; GO:0007254	JNK cascade		8.18071	8.46604	8.34659	8.19195	7.70351	8.36376	8.81377	8.67882	8.01001	7.35931		OK		4	8	6	5	2	7	10	9	3	1		0	0	0	0	0	0	0	0	0	0		4	8	6	5	2	7	10	9
GB17167	GB51894	FBgn0010303	hemipterous	JNK cascade ; GO:0007254	JNK cascade		8.19268	8.05729	8.13608	7.98795	8.33096	7.84013	8.13199	7.94199	7.6365	9.4093		OK		8	5	7	4	9	2	6	3	1	10		0	0	0	0	0	0	0	0	0	0		8	5	7	4	9	2	6	3
GB17935	GB45540	FBgn0000097	anterior open	JNK cascade ; GO:0007254	JNK cascade		9.00362	9.1278	7.98529	7.75022	8.23929	8.23333	8.34604	8.10169	8.594	7.53695		OK		9	10	3	2	6	5	7	4	8	1		0	0	0	0	0	0	0	0	0	0		9	10	3	2	6	5	7	4
GB20112	GB45657	FBgn0010341	Cdc42	JNK cascade ; GO:0007254	JNK cascade		8.52476	8.37253	8.55722	8.57153	8.35101	8.74702	8.88394	8.79307	8.66665	6.92042		OK		4	3	5	6	2	8	10	9	7	1		0	0	0	0	0	0	0	0	0	0		4	3	5	6	2	8	10	9
GB19901	GB44634	FBgn0243512		JNK cascade	JNK cascade		8.03764	7.99805	8.34143	8.22389	8.30242	8.7863	9.56471	8.80724	8.26533	9.6209		OK		2	1	6	3	5	7	9	8	4	10		0	0	0	0	0	0	0	0	0	0		2	1	6	3	5	7	9	8
GB11408	GB52985	FBgn0043884	multiple ankyrin repeats single KH domain	JAK-STAT cascade ; GO:0007259 and children	JAK-STAT ca		11.0404	10.9111	11.0596	10.8679	11.1843	10.7965	11.0028	10.8212	10.6188	12.718		OK		7	5	8	4	9	2	6	3	1	10		0	0	0	0	0	0	0	0	0	0		7	5	8	4	9	2	6	3
GB12007	GB40911	FBgn0003612	Suppressor of variegation 2-10	JAK-STAT cascade ; GO:0007259 and children	JAK-STAT ca		7.34697	7.31432	7.51111	7.52925	7.50293	7.77125	7.61896	7.72444	7.39148	7.96709		OK		2	1	5	6	4	9	7	8	3	10		0	0	0	0	0	0	0	0	0	0		2	1	5	6	4	9	7	8
GB12159	GB42244	FBgn0043903	domeless	JAK-STAT cascade ; GO:0007259 and children	JAK-STAT ca		6.41312	6.33689	6.9288	6.68767	6.79392	7.38207	7.86515	6.98778	7.10761	6.92042		OK		2	1	6	3	4	9	10	7	8	5		0	0	0	0	0	0	0	0	0	0		2	1	6	3	4	9	10	7
GB14092	GB42304	FBgn0001319	knot	JAK-STAT cascade ; GO:0007259 and children	JAK-STAT ca		5.39017	5.39293	5.35102	5.39349	5.88828	5.18933	5.23759	5.16523	5.34409	6.63751		OK		6	7	5	8	9	2	3	1	4	10		0	0	0	0	0	0	0	0	0	0		6	7	5	8	9	2	3	1
GB16422	GB44594	FBgn0004864	hopscotch	JAK-STAT cascade ; GO:0007259 and children	JAK-STAT ca		9.41449	9.58403	9.11525	9.15911	9.57293	9.17321	8.78418	9.35939	9.48311	8.79323		OK		7	10	3	4	9	5	1	6	8	2		0	0	0	0	0	0	0	0	0	0		7	10	3	4	9	5	1	6
GB18923	GB50020	FBgn0016917	Signal-transducer and activator of transcription protein at 92E	JAK-STAT cascade ; GO:0007259 and children	JAK-STAT ca		7.15611	6.99684	6.40015	7.41077	7.30314	7.71937	7.86	7.70725	7.03611	5.09416		OK		5	3	2	7	6	9	10	8	4	1		0	0	0	0	0	0	0	0	0	0		5	3	2	7	6	9	10	8
GB14250	GB51500	FBgn0085402		JAK-STAT cascade	JAK-STAT ca		10.8745	10.8502	11.3014	11.1467	11.0722	11.2191	11.2015	11.4514	10.8206	11.9998		OK		3	2	8	5	4	7	6	9	1	10		0	0	0	0	0	0	0	0	0	0		3	2	8	5	4	7	6	9
GB18949	GB55283	FBgn0041184		JAK-STAT cascade	JAK-STAT ca		9.19617	9.21581	9.02798	9.26692	9.30974	9.35664	9.43224	9.32323	9.12476	8.29787		OK		4	5	2	6	7	9	10	8	3	1		0	0	0	0	0	0	0	0	0	0		4	5	2	6	7	9	10	8
GB10026	GB44490	FBgn0031213		immune-related	immune-rela		10.1828	10.1422	10.1802	10.4548	9.98173	10.5529	10.47	10.6357	10.1869	9.83962		OK		5	3	4	7	2	9	8	10	6	1		0	0	0	0	0	0	0	0	0	0		5	3	4	7	2	9	8	10
GB11320	GB53101	FBgn0020305		immune-related	immune-rela		#N/A	#N/A	#N/A	#N/A	#N/A	#N/A	#N/A	#N/A	#N/A	#N/A		FALSE		FALSE	FALSE	FALSE	FALSE	FALSE	FALSE	FALSE	FALSE	FALSE	FALSE
GB11902	GB45882	FBgn0003326		immune-related	immune-rela		9.20012	9.1877	8.80236	9.72917	8.15057	9.50294	10.2436	9.97586	8.94173	8.39317		OK		6	5	3	8	1	7	10	9	4	2		0	0	0	0	0	0	0	0	0	0		6	5	3	8	1	7	10	9
GB12454	GB48687	not found		immune-related	immune-rela		3.88621	3.63301	7.02236	5.51621	7.26132	6.47375	6.89705	6.75614	2.82187	10.8622		OK		3	2	8	4	9	5	7	6	1	10		0	0	0	0	0	0	0	0	0	0		3	2	8	4	9	5	7	6
GB12883	GB50507	not found		immune-related	immune-rela		5.41839	5.63963	5.35102	4.70239	5.53568	4.53959	5.09902	4.84064	3.61945	8.29787		OK		7	9	6	3	8	2	5	4	1	10		0	0	0	0	0	0	0	0	0	0		7	9	6	3	8	2	5	4
GB13522	GB47208	FBgn0030018		immune-related	immune-rela		7.92255	8.18799	8.01803	8.11075	8.09459	8.24748	8.43876	8.47074	8.28084	7.35931		OK		2	6	3	5	4	7	9	10	8	1		0	0	0	0	0	0	0	0	0	0		2	6	3	5	4	7	9	10
GB13979	GB50509	not found		immune-related	immune-rela		6.14169	5.41969	7.19295	6.70797	7.13729	6.28777	7.2447	6.3408	4.27134	9.93768		OK		3	2	8	6	7	4	9	5	1	10		0	0	0	0	0	0	0	0	0	0		3	2	8	6	7	4	9	5
GB14645	GB50508	FBgn0243514		immune-related	immune-rela		8.11095	7.87171	10.0691	8.70826	9.31587	8.71683	9.35017	8.57617	5.12411	12.3055		OK		3	2	9	5	7	6	8	4	1	10		0	0	0	0	0	0	0	0	0	0		3	2	9	5	7	6	8	4
GB14962	GB54664	FBgn0027594		immune-related	immune-rela		9.03275	8.96286	8.64364	9.28048	9.14276	9.51468	9.56154	9.56394	8.91216	10.3711		OK		4	3	1	6	5	7	8	9	2	10		0	0	0	0	0	0	0	0	0	0		4	3	1	6	5	7	8	9
GB15645	GB45138	FBgn0030505		immune-related	immune-rela		8.80751	8.14962	8.94532	8.83083	9.0354	9.38379	9.32049	9.25842	6.34223	11.0346		OK		3	2	5	4	6	9	8	7	1	10		0	0	0	0	0	0	0	0	0	0		3	2	5	4	6	9	8	7
GB17018	GB42358	FBgn0087011		immune-related	immune-rela		8.43022	8.30083	7.9919	7.92022	7.70974	8.47135	8.36797	8.46564	7.59569	7.83748		OK		8	6	5	4	2	10	7	9	1	3		0	0	0	0	0	0	0	0	0	0		8	6	5	4	2	10	7	9
GB18324	GB46478	FBgn0052226		immune-related	immune-rela		9.14372	9.01286	8.98559	8.96914	9.2745	9.36315	9.01015	9.53261	8.594	9.04869		OK		7	5	3	2	8	9	4	10	1	6		0	0	0	0	0	0	0	0	0	0		7	5	3	2	8	9	4	10
GB19452	GB42685	not found		immune-related	immune-rela		9.20012	9.29174	10.2807	9.16278	8.80201	9.1806	9.60527	9.45889	8.46414	9.10606		OK		6	7	10	4	2	5	9	8	1	3		0	0	0	0	0	0	0	0	0	0		6	7	10	4	2	5	9	8
GB20003	GB42082	FBgn0041780		immune-related	immune-rela		9.09569	9.11989	9.14814	9.38929	9.06239	9.97953	9.83251	9.91923	9.98873	6.63751		OK		3	4	5	6	2	9	7	8	10	1		0	0	0	0	0	0	0	0	0	0		3	4	5	6	2	9	7	8
GB10009	GB50238	FBgn0003884	alpha-Tubulin at 84B	Immune system process (GO:0002376)	Immune syst		9.58301	9.60118	8.99548	10.0473	9.0841	8.9544	9.71626	8.34871	9.12476	8.86146		OK		7	8	4	10	5	3	9	1	6	2		0	0	0	0	0	0	0	0	0	0		7	8	4	10	5	3	9	1
GB10069	GB51712	FBgn0261560	Thor	Immune system process (GO:0002376)	Immune syst		9.29935	9.3351	9.38481	9.29892	8.97728	9.40413	9.16428	9.43172	9.2897	9.31513		OK		5	7	8	4	1	9	2	10	3	6		0	0	0	0	0	0	0	0	0	0		5	7	8	4	1	9	2	10
GB10124	GB46739	FBgn0013576	mustard	Immune system process (GO:0002376)	Immune syst		10.7322	10.8562	11.0907	10.8532	10.9189	11.3786	11.5608	11.4112	12.0059	10.5263		OK		2	4	6	3	5	7	9	8	10	1		0	0	0	0	0	0	0	0	0	0		2	4	6	3	5	7	9	8
GB10171	GB55582	FBgn0261617	nejire	Immune system process (GO:0002376)	Immune syst		5.82636	5.5937	5.06936	4.51477	5.10012	5.34986	4.8147	4.93747	5.66794	5.81283		OK		10	7	4	1	5	6	2	3	8	9		0	0	0	0	0	0	0	0	0	0		10	7	4	1	5	6	2	3
GB10274	GB52588	FBgn0010247		Immune system process (GO:0002376)	Immune syst		8.35057	8.4152	8.57931	8.36107	8.35101	8.50471	8.11046	8.50592	8.60226	7.96709		OK		3	6	9	5	4	7	2	8	10	1		0	0	0	0	0	0	0	0	0	0		3	6	9	5	4	7	2	8
GB10471	GB45135	FBgn0028982	Spt6	Immune system process (GO:0002376)	Immune syst		7.59581	7.55668	7.06066	7.65443	7.46661	8.07094	7.85483	8.05153	7.57904	6.92042		OK		6	4	2	7	3	10	8	9	5	1		0	0	0	0	0	0	0	0	0	0		6	4	2	7	3	10	8	9
GB10524	GB55808	FBgn0020306		Immune system process (GO:0002376)	Immune syst		11.5946	11.5409	11.1286	11.056	11.368	11.0057	10.934	11.1345	11.0415	12.2365		OK		9	8	5	4	7	2	1	6	3	10		0	0	0	0	0	0	0	0	0	0		9	8	5	4	7	2	1	6
GB10574	GB43216	FBgn0261547	Ephexin	Immune system process (GO:0002376)	Immune syst		10.5427	10.5679	9.97556	9.55185	9.61827	9.70709	9.5726	9.71327	9.71198	11.0493		OK		8	9	7	1	3	4	2	6	5	10		0	0	0	0	0	0	0	0	0	0		8	9	7	1	3	4	2	6
GB10654	GB47452	FBgn0261797	Dynein heavy chain 64C	Immune system process (GO:0002376)	Immune syst		11.1384	11.1044	10.6777	11.0145	11.2255	11.1576	11.1697	11.1954	10.6299	11.5403		OK		5	4	2	3	9	6	7	8	1	10		0	0	0	0	0	0	0	0	0	0		5	4	2	3	9	6	7	8
GB10667	GB50038	FBgn0001108	Glued	Immune system process (GO:0002376)	Immune syst		9.24868	9.31618	9.16285	9.29892	9.37382	9.45986	9.38464	9.33864	9.33498	9.16124		OK		3	5	2	4	8	10	9	7	6	1		0	0	0	0	0	0	0	0	0	0		3	5	2	4	8	10	9	7
GB10718	GB53167	FBgn0085432		Immune system process (GO:0002376)	Immune syst		#N/A	#N/A	#N/A	#N/A	#N/A	#N/A	#N/A	#N/A	#N/A	#N/A		FALSE		FALSE	FALSE	FALSE	FALSE	FALSE	FALSE	FALSE	FALSE	FALSE	FALSE
GB10863	GB41845	FBgn0036844	Mitogen-activated protein kinase phosphatase 3	Immune system process (GO:0002376)	Immune syst		6.19069	6.32307	6.35959	6.70797	6.80563	6.98182	7.17993	7.01602	6.47486	6.28431		OK		1	3	4	6	7	8	10	9	5	2		0	0	0	0	0	0	0	0	0	0		1	3	4	6	7	8	10	9
GB10917	GB52158	FBgn0031975	Transglutaminase	Immune system process (GO:0002376)	Immune syst		8.08121	8.09816	8.84676	8.4834	8.48039	8.90707	8.95809	9.02724	7.92037	10.588		OK		2	3	6	5	4	7	8	9	1	10		0	0	0	0	0	0	0	0	0	0		2	3	6	5	4	7	8	9
GB10996	GB53462	FBgn0005630	longitudinals lacking	Immune system process (GO:0002376)	Immune syst		#N/A	#N/A	#N/A	#N/A	#N/A	#N/A	#N/A	#N/A	#N/A	#N/A		FALSE		FALSE	FALSE	FALSE	FALSE	FALSE	FALSE	FALSE	FALSE	FALSE	FALSE
GB11052	GB43375	FBgn0040324	Ephrin	Immune system process (GO:0002376)	Immune syst		7.79747	7.88579	7.68439	7.99208	7.82894	8.79404	8.99379	8.37884	8.70931	7.69504		OK		3	5	1	6	4	9	10	7	8	2		0	0	0	0	0	0	0	0	0	0		3	5	1	6	4	9	10	7
GB11073	GB53490	FBgn0005630	longitudinals lacking	Immune system process (GO:0002376)	Immune syst		#N/A	#N/A	#N/A	#N/A	#N/A	#N/A	#N/A	#N/A	#N/A	#N/A		FALSE		FALSE	FALSE	FALSE	FALSE	FALSE	FALSE	FALSE	FALSE	FALSE	FALSE
GB11075	GB47732	FBgn0260936	scrawny	Immune system process (GO:0002376)	Immune syst		6.79603	6.76193	6.84344	6.85169	6.551	7.25317	7.26045	7.11722	7.02384	5.09416		OK		4	3	5	6	2	9	10	8	7	1		0	0	0	0	0	0	0	0	0	0		4	3	5	6	2	9	10	8
GB11202	GB49929	FBgn0002526	Laminin A	Immune system process (GO:0002376)	Immune syst		10.4528	10.4032	10.4509	10.5141	10.444	10.142	10.2025	10.4249	9.869	11.0638		OK		8	4	7	9	6	2	3	5	1	10		0	0	0	0	0	0	0	0	0	0		8	4	7	9	6	2	3	5
GB11241	GB45708	FBgn0031975	Transglutaminase	Immune system process (GO:0002376)	Immune syst		4.64544	4.26187	7.53847	4.29179	4.83822	4.21436	4.17062	4.2491	3.61945	5.09416		OK		7	5	10	6	8	3	2	4	1	9		0	0	0	0	0	0	0	0	0	0		7	5	10	6	8	3	2	4
GB11364	GB47224	FBgn0000568	Ecdysone-induced protein 75B	Immune system process (GO:0002376)	Immune syst		#N/A	#N/A	#N/A	#N/A	#N/A	#N/A	#N/A	#N/A	#N/A	#N/A		FALSE		FALSE	FALSE	FALSE	FALSE	FALSE	FALSE	FALSE	FALSE	FALSE	FALSE
GB11410	GB52999	FBgn0027932	A kinase anchor protein 200	Immune system process (GO:0002376)	Immune syst		9.53057	9.50725	10.2901	9.708	9.74634	10.7747	11.3374	9.81191	10.6717	10.8285		OK		2	1	6	3	4	8	10	5	7	9		0	0	0	0	0	0	0	0	0	0		2	1	6	3	4	8	10	5
GB11411	GB45655	FBgn0004837	Suppressor of Hairless	Immune system process (GO:0002376)	Immune syst		#N/A	#N/A	#N/A	#N/A	#N/A	#N/A	#N/A	#N/A	#N/A	#N/A		FALSE		FALSE	FALSE	FALSE	FALSE	FALSE	FALSE	FALSE	FALSE	FALSE	FALSE
GB11564	GB43099	FBgn0028982	Spt6	Immune system process (GO:0002376)	Immune syst		8.97619	8.99566	8.86126	8.76965	9.12657	8.8433	8.94113	8.94908	8.594	9.99953		OK		7	8	4	2	9	3	5	6	1	10		0	0	0	0	0	0	0	0	0	0		7	8	4	2	9	3	5	6
GB11581	GB53848	FBgn0036752	Adenosine deaminase-related growth factor A	Immune system process (GO:0002376)	Immune syst		#N/A	#N/A	#N/A	#N/A	#N/A	#N/A	#N/A	#N/A	#N/A	#N/A		FALSE		FALSE	FALSE	FALSE	FALSE	FALSE	FALSE	FALSE	FALSE	FALSE	FALSE
GB11734	GB41654	FBgn0013799	Deformed epidermal autoregulatory factor-1	Immune system process (GO:0002376)	Immune syst		7.34697	7.08099	7.62608	7.41077	7.30314	7.15432	7.53736	7.41608	6.78284	8.19582		OK		5	2	9	6	4	3	8	7	1	10		0	0	0	0	0	0	0	0	0	0		5	2	9	6	4	3	8	7
GB11906	GB45526	FBgn0021895		Immune system process (GO:0002376)	Immune syst		7.89351	7.92722	8.1301	8.16295	7.86844	7.91653	7.9403	7.85498	7.41982	9.04869		OK		4	6	8	9	3	5	7	2	1	10		0	0	0	0	0	0	0	0	0	0		4	6	8	9	3	5	7	2
GB11941	GB43092	FBgn0013762	Cyclin-dependent kinase 5	Immune system process (GO:0002376)	Immune syst		8.47989	8.30781	8.30476	8.03673	8.24787	7.73554	8.05294	7.57614	7.62843	7.83748		OK		10	9	8	5	7	3	6	1	2	4		0	0	0	0	0	0	0	0	0	0		10	9	8	5	7	3	6	1
GB12005	GB42215	FBgn0004657	myospheroid	Immune system process (GO:0002376)	Immune syst		6.73162	6.55342	7.19295	6.22	6.47956	5.83646	6.17812	6.21174	5.4975	8.79323		OK		8	7	9	5	6	2	3	4	1	10		0	0	0	0	0	0	0	0	0	0		8	7	9	5	6	2	3	4
GB12053	GB50037	FBgn0003884	alpha-Tubulin at 84B	Immune system process (GO:0002376)	Immune syst		4.15136	4.50093	4.20153	4.01182	4.37415	4.10068	3.902	3.85079	3.93632	5.09416		OK		6	9	7	4	8	5	2	1	3	10		0	0	0	0	0	0	0	0	0	0		6	9	7	4	8	5	2	1
GB12064	GB50654	FBgn0032363	CG6509	Immune system process (GO:0002376)	Immune syst		#N/A	#N/A	#N/A	#N/A	#N/A	#N/A	#N/A	#N/A	#N/A	#N/A		FALSE		FALSE	FALSE	FALSE	FALSE	FALSE	FALSE	FALSE	FALSE	FALSE	FALSE
GB12094	XP_006567597	FBgn0005630	longitudinals lacking	Immune system process (GO:0002376)	Immune syst		#N/A	#N/A	#N/A	#N/A	#N/A	#N/A	#N/A	#N/A	#N/A	#N/A		FALSE		FALSE	FALSE	FALSE	FALSE	FALSE	FALSE	FALSE	FALSE	FALSE	FALSE
GB12173	GB54228	FBgn0029113	Smt3 activating enzyme 2	Immune system process (GO:0002376)	Immune syst		7.85887	7.89973	7.97199	7.98795	7.846	8.32425	8.37881	8.24245	8.37058	6.28431		OK		3	4	5	6	2	8	10	7	9	1		0	0	0	0	0	0	0	0	0	0		3	4	5	6	2	8	10	7
GB12207	GB54477	FBgn0003731	Epidermal growth factor receptor	Immune system process (GO:0002376)	Immune syst		9.56472	9.4421	9.48651	9.48462	9.42576	9.22702	10.0806	9.27599	9.68892	10.7407		OK		7	4	6	5	3	1	9	2	8	10		0	0	0	0	0	0	0	0	0	0		7	4	6	5	3	1	9	2
GB12209	GB55970	FBgn0005655	mutagen-sensitive 209	Immune system process (GO:0002376)	Immune syst		7.96505	7.93627	7.93131	8.12961	7.80588	8.2973	8.32002	8.2661	8.1961	6.92042		OK		5	4	3	6	2	9	10	8	7	1		0	0	0	0	0	0	0	0	0	0		5	4	3	6	2	9	10	8
GB12228	GB55583	FBgn0261617	nejire	Immune system process (GO:0002376)	Immune syst		8.47989	8.3858	8.44134	8.45676	8.69945	8.35071	8.75674	8.37613	7.39148	10.3236		OK		7	4	5	6	8	2	9	3	1	10		0	0	0	0	0	0	0	0	0	0		7	4	5	6	8	2	9	3
GB12280	GB44534	FBgn0039141	spastin	Immune system process (GO:0002376)	Immune syst		5.17427	5.15735	4.7777	5.36756	5.9535	6.20831	5.86105	5.92695	5.56822	5.09416		OK		4	3	1	5	9	10	7	8	6	2		0	0	0	0	0	0	0	0	0	0		4	3	1	5	9	10	7	8
GB12288	GB42607	FBgn0264294	Cytochrome b5	Immune system process (GO:0002376)	Immune syst		4.83245	4.91033	5.78349	5.00989	5.38424	5.21347	5.4219	5.73387	4.80033	5.09416		OK		2	3	10	4	7	6	8	9	1	5		0	0	0	0	0	0	0	0	0	0		2	3	10	4	7	6	8	9
GB12298	GB48789	FBgn0032363	CG6509	Immune system process (GO:0002376)	Immune syst		7.66621	7.82377	7.03524	7.59592	8.45469	7.84758	8.34972	7.84716	7.88695	8.39317		OK		3	4	1	2	10	6	8	5	7	9		0	0	0	0	0	0	0	0	0	0		3	4	1	2	10	6	8	5
GB12312	GB47313	FBgn0003261	Rm62	Immune system process (GO:0002376)	Immune syst		11.7688	11.7642	11.3113	11.8639	11.6175	11.6179	11.3812	11.6006	11.2923	11.2149		OK		9	8	3	10	6	7	4	5	2	1		0	0	0	0	0	0	0	0	0	0		9	8	3	10	6	7	4	5
GB12357	GB42600	FBgn0036844	Mitogen-activated protein kinase phosphatase 3	Immune system process (GO:0002376)	Immune syst		7.47676	7.46583	7.69253	7.66999	7.42177	7.50508	7.48474	7.68109	7.66044	7.83748		OK		3	2	9	7	1	5	4	8	6	10		0	0	0	0	0	0	0	0	0	0		3	2	9	7	1	5	4	8
GB12373	GB46510	FBgn0010247	Poly-(ADP-ribose) polymerase	Immune system process (GO:0002376)	Immune syst		6.9735	7.01407	6.76821	7.0152	6.69662	7.13003	7.26826	7.41078	7.37227	5.09416		OK		4	5	3	6	2	7	8	10	9	1		0	0	0	0	0	0	0	0	0	0		4	5	3	6	2	7	8	10
GB12465	GB45757	FBgn0003896	tailup	Immune system process (GO:0002376)	Immune syst		5.23956	4.94861	4.90237	5.20064	5.56406	5.45391	5.6344	5.40423	4.86023	6.63751		OK		5	3	2	4	8	7	9	6	1	10		0	0	0	0	0	0	0	0	0	0		5	3	2	4	8	7	9	6
GB12478	GB49992	FBgn0021895	yantar	Immune system process (GO:0002376)	Immune syst		7.66621	7.5449	7.52941	7.67514	7.39881	7.55148	7.3588	7.55227	7.64452	8.48256		OK		8	4	3	9	2	5	1	6	7	10		0	0	0	0	0	0	0	0	0	0		8	4	3	9	2	5	1	6
GB12556	GB55472	FBgn0003205	Ras oncogene at 85D	Immune system process (GO:0002376)	Immune syst		7.10626	7.29332	7.02236	7.38586	7.20947	7.60965	7.5047	7.68109	7.10761	6.63751		OK		3	6	2	7	5	9	8	10	4	1		0	0	0	0	0	0	0	0	0	0		3	6	2	7	5	9	8	10
GB12585	GB41629	FBgn0025936	Eph receptor tyrosine kinase	Immune system process (GO:0002376)	Immune syst		10.254	10.1808	10.196	9.51074	10.1364	11.0115	11.3286	10.6973	11.3306	11.3983		OK		5	3	4	1	2	7	8	6	9	10		0	0	0	0	0	0	0	0	0	0		5	3	4	1	2	7	8	6
GB12639	GB55272	FBgn0011202	diaphanous	Immune system process (GO:0002376)	Immune syst		9.98725	9.97356	9.89507	9.62807	9.91196	9.56298	9.73887	9.89574	9.7459	10.2744		OK		9	8	5	2	7	1	3	6	4	10		0	0	0	0	0	0	0	0	0	0		9	8	5	2	7	1	3	6
GB12643	GB55408	FBgn0030964	PDGF- and VEGF-related factor 1	Immune system process (GO:0002376)	Immune syst		9.47614	9.43734	9.31015	9.23768	9.29119	9.26784	9.11327	9.1546	8.78014	11.2407		OK		9	8	7	4	6	5	2	3	1	10		0	0	0	0	0	0	0	0	0	0		9	8	7	4	6	5	2	3
GB12742	GB53016	FBgn0085407	PDGF- and VEGF-related factor 3	Immune system process (GO:0002376)	Immune syst		#N/A	#N/A	#N/A	#N/A	#N/A	#N/A	#N/A	#N/A	#N/A	#N/A		FALSE		FALSE	FALSE	FALSE	FALSE	FALSE	FALSE	FALSE	FALSE	FALSE	FALSE
GB12839	GB46452	FBgn0000996	double parked	Immune system process (GO:0002376)	Immune syst		9.13548	9.20276	8.81731	8.5465	8.65177	8.32692	8.13199	8.50094	9.0633	8.64625		OK		9	10	7	4	6	2	1	3	8	5		0	0	0	0	0	0	0	0	0	0		9	10	7	4	6	2	1	3
GB13057	GB40690	FBgn0264707	RhoGEF3	Immune system process (GO:0002376)	Immune syst		9.59958	9.48278	9.52572	8.74296	9.8806	9.55959	9.83907	9.39198	9.91611	10.4172		OK		6	3	4	1	8	5	7	2	9	10		0	0	0	0	0	0	0	0	0	0		6	3	4	1	8	5	7	2
GB13109	GB44213	FBgn0014141	cheerio	Immune system process (GO:0002376)	Immune syst		8.7654	8.332	9.69512	8.98372	9.60998	9.15231	9.48837	9.14825	6.28137	12.2932		OK		3	2	9	4	8	6	7	5	1	10		0	0	0	0	0	0	0	0	0	0		3	2	9	4	8	6	7	5
GB13113	GB50397	FBgn0021873	Gef26	Immune system process (GO:0002376)	Immune syst		6.86768	6.63382	7.18141	6.70797	7.11866	7.03513	7.79669	7.42136	6.2393	7.83748		OK		4	2	7	3	6	5	9	8	1	10		0	0	0	0	0	0	0	0	0	0		4	2	7	3	6	5	9	8
GB13159	GB53150	FBgn0263289	scribbled	Immune system process (GO:0002376)	Immune syst		9.39218	9.27758	8.92821	9.06627	9.46674	9.47075	9.34649	9.59343	8.88873	10.2744		OK		6	4	2	3	7	8	5	9	1	10		0	0	0	0	0	0	0	0	0	0		6	4	2	3	7	8	5	9
GB13170	GB46539	FBgn0040068	vav	Immune system process (GO:0002376)	Immune syst		10.0522	10.039	9.49351	9.58228	10.1189	9.45377	9.23161	9.47166	9.48087	10.5471		OK		8	7	5	6	9	2	1	3	4	10		0	0	0	0	0	0	0	0	0	0		8	7	5	6	9	2	1	3
GB13192	GB49985	FBgn0259984		Immune system process (GO:0002376)	Immune syst		5.84701	5.84896	5.43321	6.02221	6.20571	6.60328	7.12936	6.72222	5.53332	7.15657		OK		3	4	1	5	6	7	9	8	2	10		0	0	0	0	0	0	0	0	0	0		3	4	1	5	6	7	9	8
GB13202	GB40333	FBgn0040324	Ephrin	Immune system process (GO:0002376)	Immune syst		3.65356	3.63301	3.40289	3.28253	3.83097	4.15906	3.99992	3.92953	2.82187	2.82187		OK		6	5	4	3	7	10	9	8	1	1		0	0	0	0	0	0	0	0	0.5	0.5		6	5	4	3	7	10	9	8
GB13381	GB52563	FBgn0000212	brahma	Immune system process (GO:0002376)	Immune syst		10.5466	10.5802	10.3671	10.2556	10.5501	10.4685	10.3838	10.5937	10.5133	11.1482		OK		6	8	2	1	7	4	3	9	5	10		0	0	0	0	0	0	0	0	0	0		6	8	2	1	7	4	3	9
GB13405	GB54530	FBgn0031216	CG11376	Immune system process (GO:0002376)	Immune syst		7.61966	7.48447	7.02236	7.40459	7.41416	7.57862	7.70195	7.74563	6.97368	8.56672		OK		7	5	2	3	4	6	8	9	1	10		0	0	0	0	0	0	0	0	0	0		7	5	2	3	4	6	8	9
GB13459	GB51481	FBgn0031464	Dual oxidase	Immune system process (GO:0002376)	Immune syst		10.5659	10.4994	10.1242	9.94567	9.84572	9.65817	9.54078	9.99544	9.49645	11.8733		OK		9	8	7	5	4	3	2	6	1	10		0	0	0	0	0	0	0	0	0	0		9	8	7	5	4	3	2	6
GB13523	GB53472	FBgn0005630	longitudinals lacking	Immune system process (GO:0002376)	Immune syst		#N/A	#N/A	#N/A	#N/A	#N/A	#N/A	#N/A	#N/A	#N/A	#N/A		FALSE		FALSE	FALSE	FALSE	FALSE	FALSE	FALSE	FALSE	FALSE	FALSE	FALSE
GB13567	GB41547	FBgn0259099	Doublecortin-domain-containing echinoderm-microtubule-associated protein ortholog	Immune system process (GO:0002376)	Immune syst		10.2174	10.1921	10.8457	10.3349	10.5492	10.4576	10.7184	10.5879	10.25	11.0493		OK		2	1	9	4	6	5	8	7	3	10		0	0	0	0	0	0	0	0	0	0		2	1	9	4	6	5	8	7
GB13582	GB54852	FBgn0032006	PDGF- and VEGF-receptor related	Immune system process (GO:0002376)	Immune syst		9.47288	9.59548	9.55277	9.54344	9.68294	9.77993	9.69184	10.1158	9.45148	9.83962		OK		2	5	4	3	6	8	7	10	1	9		0	0	0	0	0	0	0	0	0	0		2	5	4	3	6	8	7	10
GB13642	GB41009	FBgn0031975	Transglutaminase	Immune system process (GO:0002376)	Immune syst		#N/A	#N/A	#N/A	#N/A	#N/A	#N/A	#N/A	#N/A	#N/A	#N/A		FALSE		FALSE	FALSE	FALSE	FALSE	FALSE	FALSE	FALSE	FALSE	FALSE	FALSE
GB13665	GB49498	FBgn0038046	CG5641	Immune system process (GO:0002376)	Immune syst		7.79223	7.50286	7.76378	8.09163	7.88504	8.04849	8.07088	8.13418	7.43841	7.83748		OK		4	2	3	9	6	7	8	10	1	5		0	0	0	0	0	0	0	0	0	0		4	2	3	9	6	7	8	10
GB13670	GB46338	FBgn0043550	Tetraspanin 68C	Immune system process (GO:0002376)	Immune syst		5.7406	5.66204	5.21757	5.28668	5.53568	5.30591	5.3632	5.16523	5.87608	5.09416		OK		9	8	3	4	7	5	6	2	10	1		0	0	0	0	0	0	0	0	0	0		9	8	3	4	7	5	6	2
GB13747	GB47828	FBgn0011764		Immune system process (GO:0002376)	Immune syst		8.25489	8.20305	7.91053	8.28573	8.2775	8.7148	8.65338	8.47835	7.86652	9.6209		OK		4	3	2	6	5	9	8	7	1	10		0	0	0	0	0	0	0	0	0	0		4	3	2	6	5	9	8	7
GB13819	GB51694	FBgn0003447	singed	Immune system process (GO:0002376)	Immune syst		7.85385	7.93175	7.40609	7.74533	7.82894	8.08677	8.06642	8.14059	8.08263	6.92042		OK		5	6	2	3	4	9	7	10	8	1		0	0	0	0	0	0	0	0	0	0		5	6	2	3	4	9	7	10
GB13884	GB49904	FBgn0000490	decapentaplegic	Immune system process (GO:0002376)	Immune syst		#N/A	#N/A	#N/A	#N/A	#N/A	#N/A	#N/A	#N/A	#N/A	#N/A		FALSE		FALSE	FALSE	FALSE	FALSE	FALSE	FALSE	FALSE	FALSE	FALSE	FALSE
GB13967	GB40759	FBgn0043841	virus-induced RNA 1	Immune system process (GO:0002376)	Immune syst		#N/A	#N/A	#N/A	#N/A	#N/A	#N/A	#N/A	#N/A	#N/A	#N/A		FALSE		FALSE	FALSE	FALSE	FALSE	FALSE	FALSE	FALSE	FALSE	FALSE	FALSE
GB14060	GB48932	FBgn0260935	immune response deficient 1	Immune system process (GO:0002376)	Immune syst		10.8177	10.8388	10.3232	10.2094	10.4634	10.1779	9.82988	10.1622	9.99814	11.1345		OK		8	9	6	5	7	4	1	3	2	10		0	0	0	0	0	0	0	0	0	0		8	9	6	5	7	4	1	3
GB14141	GB52278	FBgn0014141	cheerio	Immune system process (GO:0002376)	Immune syst		5.55136	5.8873	6.08833	5.92063	6.01583	5.88134	6.14432	5.83374	4.67126	7.15657		OK		2	5	8	6	7	4	9	3	1	10		0	0	0	0	0	0	0	0	0	0		2	5	8	6	7	4	9	3
GB14169	GB50932	FBgn0003117	pannier	Immune system process (GO:0002376)	Immune syst		8.06394	7.82377	7.98529	7.30842	7.92839	7.1239	7.12936	7.10413	6.45666	9.58099		OK		9	6	8	5	7	3	4	2	1	10		0	0	0	0	0	0	0	0	0	0		9	6	8	5	7	3	4	2
GB14289	GB51067	FBgn0082598	akirin	Immune system process (GO:0002376)	Immune syst		9.19418	9.23242	9.10005	9.50642	9.10313	9.47075	9.70194	9.50059	9.63564	7.53695		OK		4	5	2	8	3	6	10	7	9	1		0	0	0	0	0	0	0	0	0	0		4	5	2	8	3	6	10	7
GB14441	GB56005	FBgn0026379	Pten	Immune system process (GO:0002376)	Immune syst		8.29615	8.23272	8.2941	8.22038	8.41334	8.40473	8.43184	8.47582	8.36574	8.19582		OK		5	3	4	2	8	7	9	10	6	1		0	0	0	0	0	0	0	0	0	0		5	3	4	2	8	7	9	10
GB14446	GB44948	FBgn0259099	Doublecortin-domain-containing echinoderm-microtubule-associated protein ortholog	Immune system process (GO:0002376)	Immune syst		7.07204	6.83168	6.9288	6.7575	7.24424	6.77005	7.08581	6.92214	6.1512	8.48256		OK		7	4	6	2	9	3	8	5	1	10		0	0	0	0	0	0	0	0	0	0		7	4	6	2	9	3	8	5
GB14487	GB44982	FBgn0010395	beta[nu] integrin	Immune system process (GO:0002376)	Immune syst		10.3426	10.1827	9.96553	9.46398	9.82151	7.60085	7.5047	8.0785	9.1671	10.9588		OK		9	8	7	5	6	2	1	3	4	10		0	0	0	0	0	0	0	0	0	0		9	8	7	5	6	2	1	3
GB14518	GB55704	FBgn0026207	members only	Immune system process (GO:0002376)	Immune syst		7.25851	7.20614	7.30347	7.00704	7.11866	7.06747	6.927	7.10413	7.53655	8.29787		OK		7	6	8	2	5	3	1	4	9	10		0	0	0	0	0	0	0	0	0	0		7	6	8	2	5	3	1	4
GB14545	GB42785	FBgn0039702	Vacuolar protein sorting 16B	Immune system process (GO:0002376)	Immune syst		8.43022	8.39894	8.35174	8.22389	8.11818	7.79072	7.40201	7.81944	8.48215	7.69504		OK		9	8	7	6	5	3	1	4	10	2		0	0	0	0	0	0	0	0	0	0		9	8	7	6	5	3	1	4
GB14602	GB43446	FBgn0040505		Immune system process (GO:0002376)	Immune syst		8.52791	8.24369	7.82429	7.45934	8.72731	8.20461	8.95326	8.02058	9.12189	8.72161		OK		6	5	2	1	8	4	9	3	10	7		0	0	0	0	0	0	0	0	0	0		6	5	2	1	8	4	9	3
GB14619	GB42579	FBgn0262738	no receptor potential A	Immune system process (GO:0002376)	Immune syst		8.6341	8.13791	8.92476	8.35147	8.9301	8.17826	8.77873	8.42945	7.78904	11.3868		OK		6	2	8	4	9	3	7	5	1	10		0	0	0	0	0	0	0	0	0	0		6	2	8	4	9	3	7	5
GB14763	GB53451	FBgn0005630	longitudinals lacking	Immune system process (GO:0002376)	Immune syst		#N/A	#N/A	#N/A	#N/A	#N/A	#N/A	#N/A	#N/A	#N/A	#N/A		FALSE		FALSE	FALSE	FALSE	FALSE	FALSE	FALSE	FALSE	FALSE	FALSE	FALSE
GB14801	GB49927	FBgn0050420	Activating transcription factor-2	Immune system process (GO:0002376)	Immune syst		6.77488	6.8121	5.98496	6.49066	7.03171	6.73014	6.87673	6.90713	7.24074	2.82187		OK		5	6	2	3	9	4	7	8	10	1		0	0	0	0	0	0	0	0	0	0		5	6	2	3	9	4	7	8
GB14813	GB42608	FBgn0264294	Cytochrome b5	Immune system process (GO:0002376)	Immune syst		#N/A	#N/A	#N/A	#N/A	#N/A	#N/A	#N/A	#N/A	#N/A	#N/A		FALSE		FALSE	FALSE	FALSE	FALSE	FALSE	FALSE	FALSE	FALSE	FALSE	FALSE
GB14837	GB53251	FBgn0243511		Immune system process (GO:0002376)	Immune syst		8.77073	8.67492	8.58369	8.71826	8.56862	8.61358	8.5707	8.43989	8.65876	7.69504		OK		10	8	5	9	3	6	4	2	7	1		0	0	0	0	0	0	0	0	0	0		10	8	5	9	3	6	4	2
GB14882	GB53826	FBgn0011766	E2F transcription factor	Immune system process (GO:0002376)	Immune syst		6.79603	7.08099	6.45891	6.92282	6.64537	7.1239	7.13791	6.86891	7.31306	5.09416		OK		4	7	2	6	3	8	9	5	10	1		0	0	0	0	0	0	0	0	0	0		4	7	2	6	3	8	9	5
GB14945	GB53149	FBgn0263289	scribbled	Immune system process (GO:0002376)	Immune syst		#N/A	#N/A	#N/A	#N/A	#N/A	#N/A	#N/A	#N/A	#N/A	#N/A		FALSE		FALSE	FALSE	FALSE	FALSE	FALSE	FALSE	FALSE	FALSE	FALSE	FALSE
GB15003	GB53487	FBgn0005630	longitudinals lacking	Immune system process (GO:0002376)	Immune syst		#N/A	#N/A	#N/A	#N/A	#N/A	#N/A	#N/A	#N/A	#N/A	#N/A		FALSE		FALSE	FALSE	FALSE	FALSE	FALSE	FALSE	FALSE	FALSE	FALSE	FALSE
GB15155	GB48639	FBgn0004197	Serrate	Immune system process (GO:0002376)	Immune syst		6.12497	5.57015	6.40015	5.90297	6.30849	6.09913	6.81399	6.48973	6.00783	7.69504		OK		5	1	7	2	6	4	9	8	3	10		0	0	0	0	0	0	0	0	0	0		5	1	7	2	6	4	9	8
GB15156	GB53491	FBgn0005630	longitudinals lacking	Immune system process (GO:0002376)	Immune syst		4.74243	4.94861	5.01604	4.46291	4.83822	4.72702	4.67043	5.02756	4.67126	6.28431		OK		5	7	8	1	6	4	2	9	3	10		0	0	0	0	0	0	0	0	0	0		5	7	8	1	6	4	2	9
GB15281	GB55293	FBgn0260934	par-1	Immune system process (GO:0002376)	Immune syst		10.4896	10.413	10.391	10.517	10.7099	10.6557	10.8987	10.8252	10.4935	11.5088		OK		3	2	1	5	7	6	9	8	4	10		0	0	0	0	0	0	0	0	0	0		3	2	1	5	7	6	9	8
GB15447	GB45431	FBgn0014380	rho-like	Immune system process (GO:0002376)	Immune syst		9.75152	9.81352	10.3997	10.0314	9.99707	9.49703	9.62057	9.73354	10.285	10.0295		OK		4	5	10	8	6	1	2	3	9	7		0	0	0	0	0	0	0	0	0	0		4	5	10	8	6	1	2	3
GB15719	GB50640	FBgn0086899	Tousled-like kinase	Immune system process (GO:0002376)	Immune syst		9.82637	9.78002	9.6931	9.73534	9.86675	9.4994	9.75004	9.53017	9.42613	10.5471		OK		8	7	4	5	9	2	6	3	1	10		0	0	0	0	0	0	0	0	0	0		8	7	4	5	9	2	6	3
GB15805	GB40436	FBgn0023167	Small ribonucleoprotein particle protein SmD3	Immune system process (GO:0002376)	Immune syst		#N/A	#N/A	#N/A	#N/A	#N/A	#N/A	#N/A	#N/A	#N/A	#N/A		FALSE		FALSE	FALSE	FALSE	FALSE	FALSE	FALSE	FALSE	FALSE	FALSE	FALSE
GB16114	GB54297	FBgn0021875	Zinc finger protein RP-8	Immune system process (GO:0002376)	Immune syst		7.9697	8.06967	8.15386	8.18114	7.90688	8.30814	8.03933	8.39502	8.7765	6.28431		OK		3	5	6	7	2	8	4	9	10	1		0	0	0	0	0	0	0	0	0	0		3	5	6	7	2	8	4	9
GB16187	GB49505	FBgn0036980	RhoBTB	Immune system process (GO:0002376)	Immune syst		7.25089	7.18349	7.19295	7.19821	7.87399	7.06747	7.36609	7.13663	6.34223	8.98894		OK		7	4	5	6	9	2	8	3	1	10		0	0	0	0	0	0	0	0	0	0		7	4	5	6	9	2	8	3
GB16396	GB41740	FBgn0021760	chromosome bows	Immune system process (GO:0002376)	Immune syst		10.634	10.7084	10.7438	10.4208	10.429	10.6959	10.8502	10.6815	10.966	11.2149		OK		3	6	7	1	2	5	8	4	9	10		0	0	0	0	0	0	0	0	0	0		3	6	7	1	2	5	8	4
GB16409	GB43185	FBgn0031537	sec5	Immune system process (GO:0002376)	Immune syst		8.12767	8.13791	7.95179	7.88513	8.12751	7.95154	7.71343	7.98895	7.66044	8.29787		OK		8	9	5	3	7	4	2	6	1	10		0	0	0	0	0	0	0	0	0	0		8	9	5	3	7	4	2	6
GB16431	GB52721	FBgn0002576	lozenge	Immune system process (GO:0002376)	Immune syst		4.54014	3.75456	5.01604	4.56446	5.28458	4.10068	4.67043	4.13295	3.79276	7.69504		OK		5	1	8	6	9	3	7	4	2	10		0	0	0	0	0	0	0	0	0	0		5	1	8	6	9	3	7	4
GB16457	GB45131	FBgn0003963	u-shaped	Immune system process (GO:0002376)	Immune syst		7.27364	7.14493	8.1241	7.00704	7.39108	6.9405	7.06801	7.23594	6.49284	8.86146		OK		7	5	9	3	8	2	4	6	1	10		0	0	0	0	0	0	0	0	0	0		7	5	9	3	8	2	4	6
GB16508	GB49120	FBgn0003079	pole hole	Immune system process (GO:0002376)	Immune syst		6.98274	6.92578	6.68879	6.81476	6.93915	7.02857	7.47802	7.07088	7.10761	6.28431		OK		6	4	2	3	5	7	10	8	9	1		0	0	0	0	0	0	0	0	0	0		6	4	2	3	5	7	10	8
GB16550	GB46540	FBgn0264294	Cytochrome b5	Immune system process (GO:0002376)	Immune syst		7.65472	7.70173	7.95179	7.41694	7.128	7.49562	7.3588	7.6364	7.90041	6.63751		OK		7	8	10	4	2	5	3	6	9	1		0	0	0	0	0	0	0	0	0	0		7	8	10	4	2	5	3	6
gb16573	GB49979	FBgn0043550	Tetraspanin 68C	Immune system process (GO:0002376)	Immune syst		#N/A	#N/A	#N/A	#N/A	#N/A	#N/A	#N/A	#N/A	#N/A	#N/A		FALSE		FALSE	FALSE	FALSE	FALSE	FALSE	FALSE	FALSE	FALSE	FALSE	FALSE
GB16611	GB55798	FBgn0027491	Cdk5 activator-like protein	Immune system process (GO:0002376)	Immune syst		6.53159	6.29501	4.08877	5.39349	8.06576	6.47375	7.18819	5.69893	4.36308	5.81283		OK		8	6	1	3	10	7	9	4	2	5		0	0	0	0	0	0	0	0	0	0		8	6	1	3	10	7	9	4
GB16613	GB40656	FBgn0011823	Pendulin	Immune system process (GO:0002376)	Immune syst		8.31086	8.27611	8.45096	8.64676	8.47675	8.56017	8.68866	8.58559	7.76716	8.56672		OK		3	2	4	9	5	6	10	8	1	7		0	0	0	0	0	0	0	0	0	0		3	2	4	9	5	6	10	8
GB16680	GB51745	FBgn0037116	CG7158	Immune system process (GO:0002376)	Immune syst		8.57133	8.50909	8.1656	8.47162	8.55486	8.46167	8.32376	8.48844	8.58153	7.83748		OK		9	7	2	5	8	4	3	6	10	1		0	0	0	0	0	0	0	0	0	0		9	7	2	5	8	4	3	6
GB16711	GB41850	FBgn0029167	Hemolectin	Immune system process (GO:0002376)	Immune syst		11.0125	10.9523	10.8264	10.6212	10.7662	10.3312	9.92539	10.4676	10.641	11.8057		OK		9	8	7	4	6	2	1	3	5	10		0	0	0	0	0	0	0	0	0	0		9	8	7	4	6	2	1	3
GB16736	GB48230	FBgn0050420	Activating transcription factor-2	Immune system process (GO:0002376)	Immune syst		8.1524	8.14573	8.06266	7.89839	8.02641	8.10865	7.98831	8.21841	8.22846	8.19582		OK		7	6	4	1	3	5	2	9	10	8		0	0	0	0	0	0	0	0	0	0		7	6	4	1	3	5	2	9
GB16739	GB55914	FBgn0261524	licorne	Immune system process (GO:0002376)	Immune syst		8.51843	8.52716	8.60108	8.81461	8.55832	8.4641	8.51282	8.4834	8.17964	7.69504		OK		6	7	9	10	8	3	5	4	2	1		0	0	0	0	0	0	0	0	0	0		6	7	9	10	8	3	5	4
GB16821	GB52515	FBgn0002526	Laminin A	Immune system process (GO:0002376)	Immune syst		#N/A	#N/A	#N/A	#N/A	#N/A	#N/A	#N/A	#N/A	#N/A	#N/A		FALSE		FALSE	FALSE	FALSE	FALSE	FALSE	FALSE	FALSE	FALSE	FALSE	FALSE
GB16921	GB40741	FBgn0052133	ptip	Immune system process (GO:0002376)	Immune syst		8.18471	8.02374	7.83903	7.71567	8.15969	8.07094	8.21098	8.04129	7.41044	9.10606		OK		8	4	3	2	7	6	9	5	1	10		0	0	0	0	0	0	0	0	0	0		8	4	3	2	7	6	9	5
GB17030	GB50930	FBgn0003507		Immune system process (GO:0002376)	Immune syst		#N/A	#N/A	#N/A	#N/A	#N/A	#N/A	#N/A	#N/A	#N/A	#N/A		FALSE		FALSE	FALSE	FALSE	FALSE	FALSE	FALSE	FALSE	FALSE	FALSE	FALSE
GB17138	GB51962	FBgn0086902	kismet	Immune system process (GO:0002376)	Immune syst		12.4204	12.4441	11.9821	11.7167	12.3446	12.0241	11.806	12.1106	12.3229	13.1346		OK		8	9	3	1	7	4	2	5	6	10		0	0	0	0	0	0	0	0	0	0		8	9	3	1	7	4	2	5
GB17192	GB52973	FBgn0260866	defense repressor 1	Immune system process (GO:0002376)	Immune syst		8.92691	8.94953	8.68499	8.92017	8.86748	9.26367	9.21557	9.56632	9.42846	7.83748		OK		5	6	2	4	3	8	7	10	9	1		0	0	0	0	0	0	0	0	0	0		5	6	2	4	3	8	7	10
GB17303	GB49949	FBgn0035850	Autophagy-specific gene 18	Immune system process (GO:0002376)	Immune syst		7.81307	7.89046	7.83903	8.2274	7.99617	8.19296	8.31626	8.08516	7.39148	8.39317		OK		2	4	3	8	5	7	9	6	1	10		0	0	0	0	0	0	0	0	0	0		2	4	3	8	5	7	9	6
GB17556	GB54853	FBgn0032006	PDGF- and VEGF-receptor related	Immune system process (GO:0002376)	Immune syst		#N/A	#N/A	#N/A	#N/A	#N/A	#N/A	#N/A	#N/A	#N/A	#N/A		FALSE		FALSE	FALSE	FALSE	FALSE	FALSE	FALSE	FALSE	FALSE	FALSE	FALSE
GB17628	GB46302	FBgn0262738	no receptor potential A	Immune system process (GO:0002376)	Immune syst		7.89839	7.91812	7.70062	7.79345	8.10407	6.74624	6.71439	6.40654	7.78179	8.79323		OK		7	8	4	6	9	3	2	1	5	10		0	0	0	0	0	0	0	0	0	0		7	8	4	6	9	3	2	1
GB17687	GB55584	FBgn0016794	daughter of sevenless	Immune system process (GO:0002376)	Immune syst		8.10252	7.91812	8.09983	8.08004	8.15514	8.07094	8.37521	8.11802	8.12337	7.15657		OK		6	2	5	4	9	3	10	7	8	1		0	0	0	0	0	0	0	0	0	0		6	2	5	4	9	3	10	7
GB17764	GB40429	FBgn0015790	Rab-protein 11	Immune system process (GO:0002376)	Immune syst		9.75017	9.85463	9.87378	10.347	10.0322	9.99722	10.0493	9.96146	9.35465	10.6663		OK		2	3	4	9	7	6	8	5	1	10		0	0	0	0	0	0	0	0	0	0		2	3	4	9	7	6	8	5
GB17971	GB51743	FBgn0000490	decapentaplegic	Immune system process (GO:0002376)	Immune syst		7.61373	7.36214	7.20439	7.64921	7.39108	7.97554	8.1865	7.94199	7.17572	5.09416		OK		6	4	3	7	5	9	10	8	2	1		0	0	0	0	0	0	0	0	0	0		6	4	3	7	5	9	10	8
GB18039	GB45082	FBgn0015296	SHC-adaptor protein	Immune system process (GO:0002376)	Immune syst		8.36474	8.34902	8.00503	8.75272	8.19117	8.52111	8.26263	8.23348	8.37058	8.72161		OK		6	5	1	10	2	8	4	3	7	9		0	0	0	0	0	0	0	0	0	0		6	5	1	10	2	8	4	3
GB18366	GB41829	FBgn0034366	Autophagy-specific gene 7	Immune system process (GO:0002376)	Immune syst		9.26199	9.21581	8.99548	9.11249	9.20793	8.89454	8.90908	8.97441	9.11901	8.72161		OK		10	9	5	6	8	2	3	4	7	1		0	0	0	0	0	0	0	0	0	0		10	9	5	6	8	2	3	4
GB18378	GB43282	FBgn0004435	G protein alpha49B	Immune system process (GO:0002376)	Immune syst		7.79747	7.47207	7.04801	7.72562	8.21762	8.10243	8.46952	8.14697	7.96588	7.69504		OK		5	2	1	4	9	7	10	8	6	3		0	0	0	0	0	0	0	0	0	0		5	2	1	4	9	7	10	8
GB18613	GB52625	FBgn0003118	pointed	Immune system process (GO:0002376)	Immune syst		7.03699	7.1053	7.44517	7.18382	7.5523	8.50942	9.05814	7.98182	9.11036	9.90573		OK		1	2	4	3	5	7	8	6	9	10		0	0	0	0	0	0	0	0	0	0		1	2	4	3	5	7	8	6
GB18619	GB50333	FBgn0261592	Ribosomal protein S6	Immune system process (GO:0002376)	Immune syst		13.0929	13.0722	13.2331	12.8704	12.6575	12.3609	12.7478	12.2666	12.2318	14.5013		OK		8	7	9	6	4	3	5	2	1	10		0	0	0	0	0	0	0	0	0	0		8	7	9	6	4	3	5	2
GB18627	GB48763	FBgn0000022	achaete	Immune system process (GO:0002376)	Immune syst		5.94589	6.01382	5.26354	5.28668	6.13279	5.72578	6.01917	5.68112	6.28137	5.09416		OK		6	7	2	3	9	5	8	4	10	1		0	0	0	0	0	0	0	0	0	0		6	7	2	3	9	5	8	4
GB18643	GB47453	FBgn0261797	Dynein heavy chain 64C	Immune system process (GO:0002376)	Immune syst		#N/A	#N/A	#N/A	#N/A	#N/A	#N/A	#N/A	#N/A	#N/A	#N/A		FALSE		FALSE	FALSE	FALSE	FALSE	FALSE	FALSE	FALSE	FALSE	FALSE	FALSE
GB18722	GB54764	FBgn0026404	Nedd2-like caspase	Immune system process (GO:0002376)	Immune syst		7.24322	7.25764	7.16978	7.1546	7.09979	7.36657	7.42315	7.46804	7.5622	2.82187		OK		5	6	4	3	2	7	8	9	10	1		0	0	0	0	0	0	0	0	0	0		5	6	4	3	2	7	8	9
GB18769	GB55827	FBgn0015521	Ribosomal protein S21	Immune system process (GO:0002376)	Immune syst		6.20666	6.55342	6.27481	6.7575	6.43491	6.16082	6.05607	6.08326	6.30195	5.09416		OK		5	9	6	10	8	4	2	3	7	1		0	0	0	0	0	0	0	0	0	0		5	9	6	10	8	4	2	3
GB18813	GB51292	FBgn0260642	Antennapedia	Immune system process (GO:0002376)	Immune syst		4.36235	4.69965	5.35102	4.93963	4.93151	5.37132	5.50548	4.87373	4.44797	6.63751		OK		1	3	7	6	5	8	9	4	2	10		0	0	0	0	0	0	0	0	0	0		1	3	7	6	5	8	9	4
GB18882	GB42706	FBgn0011766		Immune system process (GO:0002376)	Immune syst		5.78414	5.72717	5.8141	5.79202	6.03601	6.00796	6.27496	6.14896	5.26036	7.53695		OK		3	2	5	4	7	6	9	8	1	10		0	0	0	0	0	0	0	0	0	0		3	2	5	4	7	6	9	8
GB18918	GB49657	FBgn0004606	Zn finger homeodomain 1	Immune system process (GO:0002376)	Immune syst		#N/A	#N/A	#N/A	#N/A	#N/A	#N/A	#N/A	#N/A	#N/A	#N/A		FALSE		FALSE	FALSE	FALSE	FALSE	FALSE	FALSE	FALSE	FALSE	FALSE	FALSE
GB18989	GB42321	FBgn0000543	ecdysoneless	Immune system process (GO:0002376)	Immune syst		8.13596	8.26897	8.07516	8.51242	8.10407	8.44458	8.5707	8.47835	8.6978	7.15657		OK		4	5	2	8	3	6	9	7	10	1		0	0	0	0	0	0	0	0	0	0		4	5	2	8	3	6	9	7
GB19031	GB46056	FBgn0032209	Hand	Immune system process (GO:0002376)	Immune syst		6.29884	6.30911	5.8734	6.47888	5.59187	6.21994	6.07417	6.3408	5.81971	5.09416		OK		7	8	4	10	2	6	5	9	3	1		0	0	0	0	0	0	0	0	0	0		7	8	4	10	2	6	5	9
GB19155	GB49172	FBgn0000541	Enhancer of bithorax	Immune system process (GO:0002376)	Immune syst		9.75825	9.76234	9.30486	9.80266	9.77925	10.5472	10.2893	10.6135	9.90781	9.4977		OK		3	4	1	6	5	9	8	10	7	2		0	0	0	0	0	0	0	0	0	0		3	4	1	6	5	9	8	10
GB19160	GB45689	FBgn0038760	Mediator complex subunit 25	Immune system process (GO:0002376)	Immune syst		9.38872	9.27045	9.00857	9.34158	9.34213	9.04627	8.92396	9.13226	8.93194	10.1706		OK		9	6	3	7	8	4	1	5	2	10		0	0	0	0	0	0	0	0	0	0		9	6	3	7	8	4	1	5
GB19168	GB47837	FBgn0011764	Dorsal switch protein 1	Immune system process (GO:0002376)	Immune syst		10.8832	10.8604	10.8411	10.9682	10.7957	11.0584	10.8567	11.0245	11.0476	9.83962		OK		6	5	3	7	2	10	4	8	9	1		0	0	0	0	0	0	0	0	0	0		6	5	3	7	2	10	4	8
GB19246	GB44931	FBgn0028436	ECSIT	Immune system process (GO:0002376)	Immune syst		8.25869	8.38909	8.27798	8.81228	8.17327	8.37411	8.02099	8.0984	8.54345	5.81283		OK		5	8	6	10	4	7	2	3	9	1		0	0	0	0	0	0	0	0	0	0		5	8	6	10	4	7	2	3
GB19301	GB47805	FBgn0043575	PGRP-SC2	Immune system process (GO:0002376)	Immune syst		5.71831	5.68409	6.6047	6.52544	6.89601	6.41442	7.03174	6.19941	5.79065	6.92042		OK		2	1	7	6	8	5	10	4	3	9		0	0	0	0	0	0	0	0	0	0		2	1	7	6	8	5	10	4
GB19311	GB49159	FBgn0031145	Nuclear transport factor-2	Immune system process (GO:0002376)	Immune syst		9.38699	9.32825	9.44139	9.61609	9.44639	9.24687	9.31109	9.36351	8.9579	10.3475		OK		6	4	7	9	8	2	3	5	1	10		0	0	0	0	0	0	0	0	0	0		6	4	7	9	8	2	3	5
GB19423	GB45127	FBgn0028541	TM9SF4	Immune system process (GO:0002376)	Immune syst		8.76807	8.74349	8.69717	8.78162	8.69632	8.67558	8.68284	8.72006	8.62269	7.69504		OK		9	8	6	10	5	3	4	7	2	1		0	0	0	0	0	0	0	0	0	0		9	8	6	10	5	3	4	7
GB19455	GB43567	FBgn0020377	Scavenger receptor class C, type II	Immune system process (GO:0002376)	Immune syst		5.44603	5.4717	5.12062	4.51477	4.83822	4.45565	4.56399	4.49533	4.73746	5.09416		OK		9	10	8	3	6	1	4	2	5	7		0	0	0	0	0	0	0	0	0	0		9	10	8	3	6	1	4	2
GB19525	GB47743	FBgn0261854	atypical protein kinase C	Immune system process (GO:0002376)	Immune syst		7.76576	7.53897	7.40609	7.93746	8.26488	8.21329	8.47626	8.28068	7.85274	8.48256		OK		3	2	1	5	7	6	9	8	4	10		0	0	0	0	0	0	0	0	0	0		3	2	1	5	7	6	9	8
GB19541	GB47201	FBgn0004657	myospheroid	Immune system process (GO:0002376)	Immune syst		11.197	11.1119	11.0117	11.0397	10.9755	11.1219	11.0185	11.266	11.0626	10.7587		OK		9	7	3	5	2	8	4	10	6	1		0	0	0	0	0	0	0	0	0	0		9	7	3	5	2	8	4	10
GB19783	GB45615	FBgn0029167	Hemolectin	Immune system process (GO:0002376)	Immune syst		#N/A	#N/A	#N/A	#N/A	#N/A	#N/A	#N/A	#N/A	#N/A	#N/A		FALSE		FALSE	FALSE	FALSE	FALSE	FALSE	FALSE	FALSE	FALSE	FALSE	FALSE
GB19857	GB46039	FBgn0003884	alpha-Tubulin at 84B	Immune system process (GO:0002376)	Immune syst		12.4965	12.365	12.7614	12.4732	12.196	12.393	12.6812	12.402	11.4724	13.3576		OK		7	3	9	6	2	4	8	5	1	10		0	0	0	0	0	0	0	0	0	0		7	3	9	6	2	4	8	5
GB19881	GB42786	FBgn0027066	Eb1	Immune system process (GO:0002376)	Immune syst		10.8652	10.858	10.7613	10.9481	10.923	10.7451	10.8586	10.6979	10.9147	10.588		OK		7	5	4	10	9	3	6	2	8	1		0	0	0	0	0	0	0	0	0	0		7	5	4	10	9	3	6	2
GB19884	GB46165	FBgn0010389	heartless	Immune system process (GO:0002376)	Immune syst		7.38924	7.03953	6.63893	7.36689	7.50293	7.77907	7.88558	7.75402	6.64519	7.15657		OK		6	3	1	5	7	9	10	8	2	4		0	0	0	0	0	0	0	0	0	0		6	3	1	5	7	9	10	8
GB19895	GB50933	FBgn0003117	pannier	Immune system process (GO:0002376)	Immune syst		5.44603	5.66204	5.54792	5.20064	5.56406	5.06161	5.5585	5.08436	4.60131	6.63751		OK		5	9	6	4	8	2	7	3	1	10		0	0	0	0	0	0	0	0	0	0		5	9	6	4	8	2	7	3
GB19906	GB45031	FBgn0014179	glial cells missing	Immune system process (GO:0002376)	Immune syst		3.88621	3.95483	4.56389	4.01182	4.30093	4.03877	3.99992	3.66773	3.38939	6.28431		OK		3	4	9	6	8	7	5	2	1	10		0	0	0	0	0	0	0	0	0	0		3	4	9	6	8	7	5	2
GB19961	GB42981	FBgn0040323	Gram-negative bacteria binding protein 1	Immune system process (GO:0002376)	Immune syst		7.65472	7.74357	8.29944	7.83083	7.67196	8.6545	8.22306	8.54268	7.5279	8.39317		OK		2	4	7	5	3	10	6	9	1	8		0	0	0	0	0	0	0	0	0	0		2	4	7	5	3	10	6	9
GB19984	GB45510	FBgn0004009	wingless	Immune system process (GO:0002376)	Immune syst		3.77799	3.95483	3.63819	4.29179	3.94466	3.64614	4.17062	3.55697	3.79276	5.81283		OK		4	7	2	9	6	3	8	1	5	10		0	0	0	0	0	0	0	0	0	0		4	7	2	9	6	3	8	1
GB11057	GB47454	FBgn0015247	Iap2	Imd-Pathway_peptidoglycan recognition protein signaling pathway ; GO:0061057	Imd-Pathway		8.61644	8.61706	8.62677	8.60426	8.53398	8.48813	8.34235	8.60194	9.00536	7.53695		OK		7	8	9	6	4	3	2	5	10	1		0	0	0	0	0	0	0	0	0	0		7	8	9	6	4	3	2	5
GB15371	GB47804	FBgn0037906	PGRP-LB	Imd-Pathway_peptidoglycan recognition protein signaling pathway ; GO:0061057	Imd-Pathway		3.88621	3.95483	3.63819	2.82187	4.13804	3.64614	3.902	3.92953	3.61945	6.63751		OK		5	8	3	1	9	4	6	7	2	10		0	0	0	0	0	0	0	0	0	0		5	8	3	1	9	4	6	7
GB15528	GB44455	FBgn0034647	pirk	Imd-Pathway_peptidoglycan recognition protein signaling pathway ; GO:0061057	Imd-Pathway		#N/A	#N/A	#N/A	#N/A	#N/A	#N/A	#N/A	#N/A	#N/A	#N/A		FALSE		FALSE	FALSE	FALSE	FALSE	FALSE	FALSE	FALSE	FALSE	FALSE	FALSE
GB16425	GB45352	FBgn0020381	Dredd	Imd-Pathway_peptidoglycan recognition protein signaling pathway ; GO:0061057	Imd-Pathway		8.25869	8.43766	8.50276	8.26882	8.04622	8.5647	8.40026	8.42158	9.44461	5.81283		OK		3	7	8	4	2	9	5	6	10	1		0	0	0	0	0	0	0	0	0	0		3	7	8	4	2	9	5	6
GB17188	GB42500	FBgn0035976	PGRP-LC	Imd-Pathway_peptidoglycan recognition protein signaling pathway ; GO:0061057	Imd-Pathway		7.72786	7.78423	8.27798	8.11454	8.15969	8.17234	8.32002	8.47328	7.62843	7.35931		OK		3	4	8	5	6	7	9	10	2	1		0	0	0	0	0	0	0	0	0	0		3	4	8	5	6	7	9	10
GB17514	GB48951	FBgn0034068	casp	Imd-Pathway_peptidoglycan recognition protein signaling pathway ; GO:0061057	Imd-Pathway		8.67448	8.69903	8.67682	8.96704	8.71499	8.88371	8.68576	8.77258	8.80181	8.92661		OK		1	4	2	10	5	8	3	6	7	9		0	0	0	0	0	0	0	0	0	0		1	4	2	10	5	8	3	6
GB18606	GB45648	FBgn0013983	imd	Imd-Pathway_peptidoglycan recognition protein signaling pathway ; GO:0061057	Imd-Pathway		#N/A	#N/A	#N/A	#N/A	#N/A	#N/A	#N/A	#N/A	#N/A	#N/A		FALSE		FALSE	FALSE	FALSE	FALSE	FALSE	FALSE	FALSE	FALSE	FALSE	FALSE
GB14664	GB48187	FBgn0026323	Tak1	Imd-Pathway	Imd-Pathway		9.51	9.6026	9.32592	9.95732	9.56951	9.90208	9.81666	9.66852	9.80787	9.16124		OK		3	5	2	10	4	9	8	6	7	1		0	0	0	0	0	0	0	0	0	0		3	5	2	10	4	9	8	6
GB17106	GB49918	not found	IKKgamma-kenny	Imd-Pathway	Imd-Pathway		9.48428	9.61673	9.48885	9.74515	9.47224	9.64327	9.32237	9.69379	10.1167	7.53695		OK		4	6	5	9	3	7	2	8	10	1		0	0	0	0	0	0	0	0	0	0		4	6	5	9	3	7	2	8
GB18650	GB41606	FBgn0086358	Tab	Imd-Pathway	Imd-Pathway		8.39613	8.00236	8.87918	8.3288	8.63552	7.86971	8.43876	8.02752	6.52813	10.3943		OK		6	3	9	5	8	2	7	4	1	10		0	0	0	0	0	0	0	0	0	0		6	3	9	5	8	2	7	4
GB19498	GB45752	FBgn0000173	dUbc13	Imd-Pathway	Imd-Pathway		8.21241	8.28675	8.08755	8.56877	8.46208	8.65662	8.98908	8.73919	8.73581	7.15657		OK		3	4	2	6	5	7	10	9	8	1		0	0	0	0	0	0	0	0	0	0		3	4	2	6	5	7	10	9
GB30399	GB55968	not found		Imd-Pathway	Imd-Pathway		6.68701	6.8795	6.94255	6.58159	6.65836	6.53998	6.89705	6.69624	7.37227	2.82187		OK		5	7	9	3	4	2	8	6	10	1		0	0	0	0	0	0	0	0	0	0		5	7	9	3	4	2	8	6
GB10469	GB52343	FBgn0037107		IG Superfamily Genes	IG Superfam		10.5009	10.4763	10.731	10.5752	10.4989	10.2344	10.9757	10.6007	10.7665	10.3236		OK		5	3	8	6	4	1	10	7	9	2		0	0	0	0	0	0	0	0	0	0		5	3	8	6	4	1	10	7
GB10912	GB53701	not found		IG Superfamily Genes	IG Superfam		6.41312	6.06474	4.63936	4.97523	6.81724	5.83646	5.6588	5.66308	5.66794	5.81283		OK		9	8	1	2	10	7	3	4	5	6		0	0	0	0	0	0	0	0	0	0		9	8	1	2	10	7	3	4
GB11115	GB47239	FBgn0029082		IG Superfamily Genes	IG Superfam		9.02161	9.06531	8.57492	8.60156	8.69945	8.84702	8.66524	8.87606	8.8302	8.79323		OK		9	10	1	2	4	7	3	8	6	5		0	0	0	0	0	0	0	0	0	0		9	10	1	2	4	7	3	8
GB11358	GB55483	FBgn0005666		IG Superfamily Genes	IG Superfam		13.2047	12.9219	13.6817	13.2101	13.663	13.0593	13.7349	13.0046	11.4086	16.2628		OK		5	2	8	6	7	4	9	3	1	10		0	0	0	0	0	0	0	0	0	0		5	2	8	6	7	4	9	3
GB11807	GB53012	FBgn0010473		IG Superfamily Genes	IG Superfam		10.286	10.1471	10.5693	9.16644	10.6244	10.8265	11.6092	10.772	11.368	12.123		OK		3	2	4	1	5	7	9	6	8	10		0	0	0	0	0	0	0	0	0	0		3	2	4	1	5	7	9	6
GB11846	GB44650	FBgn0002968	Neuroglian	IG Superfamily Genes	IG Superfam		10.8009	10.84	10.5199	10.7376	10.6919	11.0053	11.2461	11.107	11.1517	9.4977		OK		5	6	2	4	3	7	10	8	9	1		0	0	0	0	0	0	0	0	0	0		5	6	2	4	3	7	10	8
GB11918	GB49767	not found		IG Superfamily Genes	IG Superfam		7.55927	7.53301	7.53847	5.95531	7.72826	7.06106	7.61896	7.13019	7.72239	8.19582		OK		6	4	5	1	9	2	7	3	8	10		0	0	0	0	0	0	0	0	0	0		6	4	5	1	9	2	7	3
GB12490	GB53013	FBgn0028482		IG Superfamily Genes	IG Superfam		9.34294	8.80648	10.0753	9.54905	10.1166	9.05594	9.62361	8.68102	6.59619	12.1975		OK		5	3	8	6	9	4	7	2	1	10		0	0	0	0	0	0	0	0	0	0		5	3	8	6	9	4	7	2
GB12933	GB40916	not found		IG Superfamily Genes	IG Superfam		6.60543	6.54155	5.98496	5.62888	6.99131	6.19659	6.50493	6.0561	6.61271	7.15657		OK		7	6	2	1	9	4	5	3	8	10		0	0	0	0	0	0	0	0	0	0		7	6	2	1	9	4	5	3
GB13261	GB44117	FBgn0000547		IG Superfamily Genes	IG Superfam		8.98997	8.67762	9.01507	8.79349	9.04281	8.97835	9.44433	8.68541	7.44761	11.2787		OK		6	2	7	4	8	5	9	3	1	10		0	0	0	0	0	0	0	0	0	0		6	2	7	4	8	5	9	3
GB14317	GB49171	FBgn0021764		IG Superfamily Genes	IG Superfam		7.97894	7.89973	7.61756	7.62281	7.81746	7.9236	7.9693	7.97107	7.8458	8.39317		OK		9	5	1	2	3	6	7	8	4	10		0	0	0	0	0	0	0	0	0	0		9	5	1	2	3	6	7	8
GB14520	GB46360	FBgn0000635		IG Superfamily Genes	IG Superfam		8.77869	8.66408	8.5257	7.70564	8.64853	8.77268	9.02402	8.25137	9.61539	8.92661		OK		7	5	3	1	4	6	9	2	10	8		0	0	0	0	0	0	0	0	0	0		7	5	3	1	4	6	9	2
GB14642	GB47977	FBgn0086906		IG Superfamily Genes	IG Superfam		14.836	14.7575	14.5898	14.396	14.5426	14.9406	15.0516	14.7622	15.1999	16.304		OK		6	4	3	1	2	7	8	5	9	10		0	0	0	0	0	0	0	0	0	0		6	4	3	1	2	7	8	5
GB15344	GB41645	FBgn0000464		IG Superfamily Genes	IG Superfam		9.37828	9.26328	9.81355	8.86723	10.0059	10.0303	10.3206	9.66074	10.3514	11.7795		OK		3	2	5	1	6	7	8	4	9	10		0	0	0	0	0	0	0	0	0	0		3	2	5	1	6	7	8	4
GB15987	GB45774	FBgn0259141		IG Superfamily Genes	IG Superfam		9.22363	9.0979	8.10594	7.28839	9.30563	8.58267	8.83754	8.53053	9.26132	7.96709		OK		8	7	3	1	10	5	6	4	9	2		0	0	0	0	0	0	0	0	0	0		8	7	3	1	10	5	6	4
GB16060	GB46759	FBgn0037736		IG Superfamily Genes	IG Superfam		5.94589	5.99643	4.96044	4.70239	6.46483	6.13647	6.39459	5.80123	6.40059	5.81283		OK		5	6	2	1	10	7	8	3	9	4		0	0	0	0	0	0	0	0	0	0		5	6	2	1	10	7	8	3
GB30209	GB44159	not found		IG superfamily genes	IG superfam		10.6579	10.3585	10.4569	9.47728	10.7758	10.1675	10.6759	10.077	9.63765	12.8952		OK		7	5	6	1	9	4	8	3	2	10		0	0	0	0	0	0	0	0	0	0		7	5	6	1	9	4	8	3
GB11717	GB49260	FBgn0061354	CTL1	C-lectin domain	C-lectin do		7.97433	7.56254	7.95855	8.2517	7.70351	8.05494	9.21153	8.37884	6.00783	9.87305		OK		5	2	4	7	3	6	9	8	1	10		0	0	0	0	0	0	0	0	0	0		5	2	4	7	3	6	9	8
GB11792	GB55225	FBgn0001083	CTL6	C-lectin domain	C-lectin do		9.3483	9.26866	8.96895	8.38951	8.59911	8.74502	8.55166	8.76638	8.16856	10.608		OK		9	8	7	2	4	5	3	6	1	10		0	0	0	0	0	0	0	0	0	0		9	8	7	2	4	5	3	6
GB11810	GB44210	FBgn0037240	CTL10	C-lectin domain	C-lectin do		8.61348	8.683	8.57492	8.46866	8.39801	8.5304	8.88647	8.69415	8.62269	8.08599		OK		6	8	5	3	2	4	10	9	7	1		0	0	0	0	0	0	0	0	0	0		6	8	5	3	2	4	10	9
GB13808	GB43983	FBgn0030617	CTL12	C-lectin domain	C-lectin do		8.42008	8.29381	8.84311	8.45676	9.03292	8.02568	8.41438	8.38155	8.54773	9.65973		OK		5	2	8	6	9	1	4	3	7	10		0	0	0	0	0	0	0	0	0	0		5	2	8	6	9	1	4	3
GB14265	GB45248	FBgn0032180	CTL2	C-lectin domain	C-lectin do		9.13342	9.00643	8.59241	8.01661	8.83369	7.8879	7.95487	8.16595	7.95947	9.36299		OK		9	8	6	4	7	1	2	5	3	10		0	0	0	0	0	0	0	0	0	0		9	8	6	4	7	1	2	5
GB14382	GB51399	FBgn0013997	CTL8	C-lectin domain	C-lectin do		9.6683	9.67324	9.16577	9.47434	9.57633	9.77017	9.81931	9.83777	9.24823	9.26564		OK		6	7	1	4	5	8	9	10	2	3		0	0	0	0	0	0	0	0	0	0		6	7	1	4	5	8	9	10
GB14975	GB52656	FBgn0031629	CTL7	C-lectin domain	C-lectin do		13.2421	13.2263	13.7386	13.3252	13.0468	13.0603	13.8576	13.4845	13.5636	13.0997		OK		5	4	9	6	1	2	10	7	8	3		0	0	0	0	0	0	0	0	0	0		5	4	9	6	1	2	10	7
GB15050	GB47095	not found	CTL9	C-lectin domain	C-lectin do		5.78414	5.96099	5.47252	5.69232	5.99536	6.56745	6.53123	6.52957	6.45666	6.28431		OK		3	4	1	2	5	10	9	8	7	6		0	0	0	0	0	0	0	0	0	0		3	4	1	2	5	10	9	8
GB17330	GB40445	FBgn0031918	CTL5	C-lectin domain	C-lectin do		11.3816	11.2952	8.86845	9.79205	9.20353	10.1919	10.4418	9.69814	9.69665	12.9074		OK		9	8	1	5	2	6	7	4	3	10		0	0	0	0	0	0	0	0	0	0		9	8	1	5	2	6	7	4
GB18049	GB46626	FBgn0035199	CTL3	C-lectin domain	C-lectin do		#N/A	#N/A	#N/A	#N/A	#N/A	#N/A	#N/A	#N/A	#N/A	#N/A		FALSE		FALSE	FALSE	FALSE	FALSE	FALSE	FALSE	FALSE	FALSE	FALSE	FALSE
GB19013	GB43691	FBgn0038017	CTL11	C-lectin domain	C-lectin do		10.6369	10.6851	9.13627	9.58364	9.17908	9.19088	9.43397	9.0948	9.13617	8.64625		OK		9	10	4	8	5	6	7	2	3	1		0	0	0	0	0	0	0	0	0	0		9	10	4	8	5	6	7	2
GB20122	GB47938	FBgn0031879	CTL4	C-lectin domain	C-lectin do		10.6296	10.3678	10.7574	10.5326	10.7238	10.3172	10.7291	10.3796	8.48661	13.2819		OK		6	3	9	5	7	2	8	4	1	10		0	0	0	0	0	0	0	0	0	0		6	3	9	5	7	2	8	4
GB10036	GB47618	FBgn0010385	Defensin-2	Antimicrobial peptide - AMP	Antimicrobi		#N/A	#N/A	#N/A	#N/A	#N/A	#N/A	#N/A	#N/A	#N/A	#N/A		FALSE		FALSE	FALSE	FALSE	FALSE	FALSE	FALSE	FALSE	FALSE	FALSE	FALSE
GB17538	GB51223	not found	Hymenoptaecin	Antimicrobial peptide - AMP	Antimicrobi		5.96486	6.43007	5.51074	5.44391	5.9535	6.41442	5.60956	5.54962	5.38409	9.99953		OK		7	9	3	2	6	8	5	4	1	10		0	0	0	0	0	0	0	0	0	0		7	9	3	2	6	8	5	4
GB17782	GB47546	not found	Apidaecin	Antimicrobial peptide - AMP	Antimicrobi		3.65356	3.48702	4.63936	3.47063	3.94466	3.40863	3.5144	3.4242	2.82187	5.81283		OK		7	5	9	4	8	2	6	3	1	10		0	0	0	0	0	0	0	0	0	0		7	5	9	4	8	2	6	3
GB18323	GB47318	not found	abaecin	Antimicrobial peptide - AMP	Antimicrobi		#N/A	#N/A	#N/A	#N/A	#N/A	#N/A	#N/A	#N/A	#N/A	#N/A		FALSE		FALSE	FALSE	FALSE	FALSE	FALSE	FALSE	FALSE	FALSE	FALSE	FALSE
GB19392	GB41428	FBgn0010385	Defensin-1	Antimicrobial peptide - AMP	Antimicrobi		3.50401	3.29426	3.63819	3.73194	3.33407	3.23819	3.31389	3.4242	3.38939	6.28431		OK		7	2	8	9	4	1	3	6	5	10		0	0	0	0	0	0	0	0	0	0		7	2	8	9	4	1	3	6
GB19468	GB53576	not found	apisimin	Antimicrobial peptide - AMP	Antimicrobi		4.78824	4.94861	5.35102	4.22842	4.50792	4.57945	4.17062	4.69891	5.07541	2.82187		OK		7	8	10	3	4	5	2	6	9	1		0	0	0	0	0	0	0	0	0	0		7	8	10	3	4	5	2	6
GB10896	GB53625	FBgn0051997	Vago	Vago orthologue	Vago orthol		12.9162	12.9415	12.8176	12.431	12.3122	12.1729	12.8686	12.0717	13.0554	13.5738		OK		7	8	5	4	3	2	6	1	9	10		0	0	0	0	0	0	0	0	0	0		7	8	5	4	3	2	6	1
GB12654	GB48208	FBgn0262739	AGO1 argonaute 1	RNAi	RNAi		#N/A	#N/A	#N/A	#N/A	#N/A	#N/A	#N/A	#N/A	#N/A	#N/A		FALSE		FALSE	FALSE	FALSE	FALSE	FALSE	FALSE	FALSE	FALSE	FALSE	FALSE
GB19288	GB48923	FBgn0034246	Dicer-2	RNAi	RNAi		10.8782	10.9316	10.6171	10.4169	10.5826	10.474	10.0288	10.6493	11.1524	8.79323		OK		8	9	6	3	5	4	2	7	10	1		0	0	0	0	0	0	0	0	0	0		8	9	6	3	5	4	2	7
GB19389	GB49909	FBgn0250816	argonaute 3	RNAi	RNAi		#N/A	#N/A	#N/A	#N/A	#N/A	#N/A	#N/A	#N/A	#N/A	#N/A		FALSE		FALSE	FALSE	FALSE	FALSE	FALSE	FALSE	FALSE	FALSE	FALSE	FALSE
[truncated: 15 more columns]

## Sheet: samples' ids and DWV infection
sample	sample name in the article	sample code	DWV infection	mite	virus
L26	NP26	2	2010.37	no	yes
L28	NP28	3	1734.11	no	yes
L30	NP30	4	2603.11	no	yes
L34	NP34	5	1644.58	no	yes
L35	NP35	6	2195.4	no	yes
median			2010.37	no	yes
st. dev.			384.712	no	yes
LV13	P13	7	2124.37	yes	low
LV26	P26	8	3742.94	yes	low
LV27	P27	9	466.945	yes	low
LV34	P34	10	2486.99	yes	low
LV35	P35	11	948.092	yes	low
median			2124.37	yes	low
st. dev.			1297.75	yes	low
LV6	P6	12	2.96285e+06	yes	high
LV9	P9	13	1.3802e+06	yes	high
LV11	P11	14	5.68629e+07	yes	high
LV24	P24	15	1.52024e+06	yes	high
LV31	P31	16	7.00586e+09	yes	high
median			2.96285e+06	yes	high
st. dev.			3.12619e+09	yes	high

## Sheet: reference parameters
Pparameters to be used for filtering data
miminum expression value	0
number of samples with expr. val. above miminum group 1	5
number of samples with expr. val. above miminum group 2	5
Parameter to be used for assessing differential expression	0.01

## Sheet: data
	1	2	3	4	5	6	7	8	9	10	11	12	13	14	15	16
gene name		l26	l28	l30	l34	l35	lv_13 (LI)	lv_26 (LI)	lv_27 (LI)	lv_34 (LI)	lv_35 (LI)	lv_6 (HI)	lv_9 (HI)	lv_11 (HI)	lv_24 (HI)	lv_31 (HI)
14-3-3epsilon	#N/A	8.80231	8.80648	8.86845	9.0002	9.2974	8.33581	9.74397	9.46623	8.99735	10.0136	9.87592	10.1717	9.29191	9.53576	10.2234
18-w	GB43456	5.64921	4.87089	5.21757	4.93963	6.41971	3.78146	4.75491	4.0086	5.67906	5.5242	5.43372	5.90228	5.40423	3.38939	7.15657
2-Sep	GB41469	8.8101	8.7791	9.16285	8.84687	8.83084	9.19482	9.13552	9.0844	8.73621	8.97265	8.89992	8.83492	8.93071	9.10456	9.21438
4EHP	GB53152	6.82718	7.27916	7.12231	7.19103	7.04164	7.06438	7.12557	7.23301	6.90052	7.13216	7.11155	6.71439	7.10413	7.01146	5.81283
5-HT1	GB48005	6.92637	6.96175	6.62192	5.93808	7.20064	5.91574	6.64777	5.6388	7.21391	6.47099	6.52137	7.1964	6.21174	6.9084	6.92042
5-HT2alpha	GB42606	5.82636	5.66204	5.58412	5.10869	6.13279	5.04022	5.75701	5.03831	6.26568	5.68657	5.4738	5.96194	5.54962	5.56822	6.63751
5-HT2beta	GB51376	5.10562	4.11976	5.26354	5.28668	5.05995	3.30825	4.49496	4.36219	4.63324	4.95065	4.97859	4.90249	5.35969	3.61945	2.82187
5-ht7	GB14021	4.07062	4.32651	3.63819	3.92777	3.83097	4.15604	4.07936	4.25676	3.71846	3.75558	4.03877	4.17062	3.92953	4.36308	2.82187
A4	GB55452	8.58046	8.5509	10.0753	9.29725	8.93807	11.025	8.99004	10.7472	8.10966	8.99451	10.3411	9.77487	10.0937	8.85459	9.26564
ABC10	GB45254	10.4184	10.441	10.4981	10.6292	10.468	10.1825	10.3753	10.3203	10.4535	10.2885	10.3477	10.065	10.3508	10.5286	9.99953
ABCB7	GB48370	9.70217	9.80244	9.38732	9.80618	9.64286	9.73498	9.60855	9.84032	9.84438	9.6143	9.50058	9.36841	9.47546	9.94397	8.19582
ABCC5	GB48854	11.3998	11.4551	11.2229	10.2547	11.3695	10.5252	11.3042	10.6997	11.6653	10.9393	10.8494	10.1253	10.8217	11.5534	10.6853
ABCG4	GB53043	8.1646	8.27966	8.50276	8.82853	8.88957	8.90362	8.83857	8.69493	8.57215	8.99884	8.88371	9.19118	8.76845	8.72451	8.48256
ACSF2	GB44116	6.60543	6.46821	7.74825	7.13228	7.01165	5.36903	5.56717	6.82835	5.85023	5.83192	6.20831	6.60734	6.57785	4.91746	7.69504
AChE-1	GB43191	8.99908	8.92703	8.58369	8.16295	9.16783	8.7892	8.9643	8.52692	9.31577	8.77723	8.83583	9.40775	8.65439	9.21363	9.7344
AChE-2	GB41856	8.61348	8.74606	8.13608	7.04737	9.05995	8.33581	10.0722	8.9432	8.67031	9.61006	9.18501	9.50989	8.22144	10.3841	7.35931
AGLU-like2	GB48669	9.14987	9.13371	8.9555	9.02055	8.9032	9.32098	9.01988	8.87874	8.91545	9.06022	9.0019	9.18502	9.13066	9.10456	9.04869
AGLU2	GB43248	4.74243	5.09137	6.55176	5.28668	5.86584	5.45386	5.71193	6.78746	5.11058	5.81206	5.37132	5.60956	5.19113	5.34409	5.09416
AGLU3	GB48667	7.36826	7.17586	7.16978	6.54817	5.99536	5.68084	6.64777	5.86275	6.4292	6.35333	6.06078	6.25928	6.4591	6.76818	5.09416
2001-08-01	#N/A	5.57648	5.30933	4.96044	5.51621	5.84305	5.63352	5.28584	4.88395	5.63799	5.36794	6.09913	6.09204	5.95669	5.63549	5.81283
2002-08-01	#N/A	9.45809	9.53131	9.31279	9.18638	9.28287	9.8242	9.4286	9.301	9.34734	9.27185	9.50765	9.51972	9.64505	9.60105	9.96894
AIF	GB40775	8.93405	8.80401	8.96895	9.3039	8.83938	9.56768	8.80469	9.33248	8.69752	8.86526	9.04303	9.03549	9.16092	8.82668	8.19582
ALDH1L2	GB43892	9.28079	9.23609	9.61612	9.14991	9.31178	9.53491	9.28855	9.38393	9.34265	9.1051	9.06396	9.34465	9.42254	8.75445	10.3711
ALiX	GB53174	10.3381	10.3777	10.1817	10.1852	9.99962	10.3115	10.1068	10.2183	9.9114	9.95799	10.1904	9.99161	10.2757	10.2248	10.4397
ANAPC1	GB49491	9.55239	9.56958	9.28617	9.18097	9.67024	9.18681	9.55155	9.04347	9.69286	9.42774	9.33296	9.0171	9.50308	9.90781	9.10606
ANKRD50	GB53611	9.78483	9.76234	9.67885	9.55325	9.6542	8.81021	9.36922	9.44805	9.6618	9.12505	9.37092	9.26704	9.20439	9.33498	10.6471
AP-1sigma	GB50414	6.28389	6.37758	6.08833	6.58159	6.70915	7.02886	6.52441	6.4733	6.25228	6.43284	6.71386	7.12936	6.55873	6.61271	2.82187
AP-2	GB50795	7.90326	7.99372	7.88945	7.42307	7.62	7.20621	7.85371	7.26903	8.25997	7.87006	7.52382	7.76396	7.59027	8.02237	8.72161
AP-50	GB47998	10.7137	10.7634	10.7919	11.1564	10.9169	11.6757	10.8084	11.2004	10.7293	10.9297	11.0822	11.5178	11.0456	10.9031	9.90573
APC7	GB54957	8.26248	8.39238	8.11202	8.62832	8.57204	8.56642	8.11434	8.32537	8.03401	8.09723	8.31622	8.55803	8.30657	8.36574	6.28431
APP-BP1	GB50643	10.5992	10.6539	10.5693	10.4215	10.4393	10.0497	10.3868	10.3394	10.7167	10.2796	10.1713	9.87651	10.2216	10.695	10.2234
AQR	GB42016	10.4252	10.4283	10.2995	10.0071	10.3386	9.59063	10.1899	9.75945	10.5871	10.1158	9.78188	9.544	9.92109	10.1634	10.6471
AST	GB47928	5.14039	4.60434	5.12062	5.14005	5.35183	3.78146	4.65744	3.7696	4.7603	4.7901	4.82725	5.58426	5.05627	4.27134	6.28431
ATF-3-like	GB53401	9.51159	9.47969	10.2299	10.0631	9.98815	10.6047	9.78998	10.1873	9.32531	9.86023	10.4841	10.6168	10.5323	9.32753	9.93768
ATM	GB50923	10.2368	10.3245	10.1613	9.67502	10.0989	9.49329	10.3529	9.8931	10.5367	10.1148	9.64541	9.18708	9.77223	10.636	9.45418
ATP11B	GB42853	5.7406	5.57015	5.43321	5.69232	6.47956	5.33953	5.98191	5.84675	5.61698	5.64209	5.37132	4.94423	5.80123	5.69964	5.09416
ATP5G2	GB40457	15.3031	15.1484	15.417	15.6557	15.3518	13.3735	14.4655	14.8553	14.9834	14.6968	14.6123	14.3525	14.3155	13.855	16.262
ATP7	GB54389	8.5025	8.46291	8.50276	8.52102	8.32692	8.17493	8.36748	8.10099	8.48396	8.5716	8.47135	8.25088	8.44507	7.96588	8.29787
ATPCL	GB54216	10.2502	10.2702	10.2411	10.157	10.2139	10.3956	10.203	10.1379	10.0965	10.2805	10.3827	10.2893	10.4554	10.0964	9.83962
ATPsyn-Cf6	GB52644	8.76807	9.10593	8.66859	9.20605	8.43604	8.93266	8.64593	9.22982	8.68522	7.73107	7.96187	7.56296	8.03786	9.06927	8.48256
ATPsyn-d	#N/A	11.7821	11.9544	11.9181	12.3705	11.8577	12.427	11.8063	12.5451	11.9694	11.88	11.9336	11.467	11.7604	12.1522	10.9113
Aats-arg	GB54842	8.21632	8.26538	8.42679	8.51242	8.32692	9.02769	8.46417	8.69933	8.192	8.30044	8.61139	8.30872	8.53053	8.61863	6.63751
Aats-asp	GB52729	9.24102	9.1571	9.10005	9.58638	9.12424	9.92878	9.11653	9.46752	9.22689	9.23194	9.35664	9.47159	9.31192	9.21632	8.08599
Aats-gln	GB41304	8.23573	8.23272	8.24517	8.21332	8.08505	8.88393	8.28668	8.38667	8.1745	8.31788	8.48813	8.12342	8.31793	8.46414	6.92042
Aats-glupro	GB47572	9.97576	10.0996	9.75846	9.76939	10.036	10.1039	10.1521	9.75206	10.1259	10.0104	9.94784	9.40952	9.89385	10.0564	9.45418
Aats-gly	GB51999	8.86596	9.00429	8.71723	9.03462	8.66143	9.48024	8.7941	8.90753	8.79236	8.78978	9.02999	9.1538	9.0081	8.92866	7.69504
Aats-ile	GB53173	8.35413	8.55971	8.38725	8.81228	8.51988	9.49167	8.62218	8.898	8.19548	8.4086	8.9544	8.80576	9.05804	8.65082	7.15657
Aats-lys	GB49155	9.05258	9.06942	9.15992	9.20605	8.89504	10.0037	9.1991	9.34517	8.98536	9.13689	8.97154	9.17261	9.13708	9.15031	9.26564
Aats-met	GB50039	9.46468	9.50573	9.37474	8.99404	9.28495	9.01643	9.39222	9.17719	9.44981	8.86763	8.63741	8.28202	8.77052	9.39559	7.53695
Aats-phe	GB44144	9.51477	9.58546	9.59241	10.145	9.56437	9.79155	9.60401	10.1216	9.75657	9.80936	9.88227	9.26315	9.62234	9.66745	8.72161
Aats-ser	GB40207	7.28861	7.24311	7.23818	7.74533	7.32766	8.13799	7.4296	7.86284	7.14355	7.29631	7.77125	7.33669	7.73295	7.54515	5.09416
Aats-trp	GB46801	7.76576	7.60289	7.91053	8.37694	7.67196	8.53204	7.52885	8.33671	7.59208	7.60592	8.07094	8.16578	8.22446	8.28084	6.63751
Aats-tyr	GB52739	10.2252	10.3037	10.3479	10.5206	10.184	10.5291	10.1406	10.2516	10.0891	10.1415	10.1191	10.1015	10.2764	10.2302	9.58099
Aats-val	GB45284	10.6977	10.7358	10.5945	10.3678	10.4989	10.2427	10.6625	10.2812	10.7753	10.4466	10.2429	9.88414	10.4353	10.7284	10.7224
Abd-A	GB51287	5.7406	5.8873	6.49678	5.07657	5.31862	6.56597	7.81754	7.59163	5.75774	7.70478	6.42448	6.85612	6.24812	8.48661	5.09416
Abd-B	GB51284	3.30644	3.48702	3.8153	3.61319	3.94466	2.82187	2.82187	3.25178	3.82045	4.04203	3.90178	4.17062	3.66773	2.82187	6.63751
Abi	GB47882	9.05695	9.09184	9.00531	9.06039	9.24267	8.58178	8.96902	8.9339	9.15198	9.04564	8.8728	8.91902	8.99401	9.0633	10.0588
Abscam	GB45774	9.22363	9.0979	8.10594	7.28839	9.30563	7.96596	8.62816	7.74856	8.93429	8.12524	8.58267	8.83754	8.53053	9.26132	7.96709
Ac3	GB45150	8.93643	9.03196	8.85402	7.79345	8.91402	8.33581	9.50362	8.44284	9.57778	9.36706	8.67976	9.11543	8.63863	9.48757	10.3475
Acf1	GB44433	7.76041	7.8951	7.71667	7.97549	7.90145	8.64457	8.38523	8.16602	8.09856	8.30044	8.3946	8.00707	8.48592	8.60226	7.53695
Ack	GB48061	7.44373	7.37552	7.14624	7.36051	7.60002	7.73801	7.63364	7.02396	7.98262	7.79229	7.56058	7.6067	7.42136	7.08417	8.19582
Acph-1	GB41338	4.36235	4.19318	5.30798	4.61218	5.13911	5.30939	5.08389	5.48054	4.7603	4.87289	5.08815	5.09902	4.80667	5.07541	5.09416
Actn	GB43198	12.5926	12.5548	13.0487	12.6552	12.3988	11.8849	13.1521	12.8012	11.7604	13.1098	13.1329	13.9325	12.285	13.0566	13.7393
Ada	GB55421	6.03827	6.23717	5.90213	6.31606	5.59187	6.43599	6.00068	6.28575	5.86802	5.99904	5.64095	6.14432	5.71651	6.61271	5.09416
Adam	GB47542	10.1525	10.2238	10.3645	10.3045	10.2291	10.6866	10.309	10.4538	10.2447	10.3278	10.1823	10.3243	10.072	10.0564	11.6408
Adar	GB50090	8.65443	8.58292	8.70523	8.51242	9.1149	7.62976	9.0312	8.38939	8.62979	8.80222	8.35855	8.68576	8.61811	8.76919	9.77033
Adk1	GB42431	7.99726	8.05729	8.05637	8.52672	8.20004	8.56333	7.94752	8.81329	8.14244	7.98812	8.3895	8.23106	8.4554	9.00846	7.15657
Adk2	GB42845	10.3683	10.4008	10.1715	11.0466	10.5784	11.1279	10.2209	10.879	10.3206	10.6897	10.6877	10.4289	10.2351	10.3205	8.72161
Adk3	GB44967	8.23959	8.17658	8.9385	8.83083	8.655	8.33581	8.29797	9.06238	8.40211	8.36227	8.40978	8.06642	8.36796	8.60637	7.15657
AdoR	GB51506	5.80541	5.96099	5.21757	5.28668	5.9535	5.58453	6.0192	5.78082	5.88558	5.42203	5.37132	5.30186	5.40423	5.81971	5.81283
2003-08-01	#N/A	5.23956	4.91033	4.20153	4.35173	4.83822	4.43016	5.15466	4.74556	3.82045	5.09351	4.61804	4.24651	5.05627	4.67126	2.82187
Ak6	GB51623	7.71131	7.68572	7.91053	7.86725	7.31136	8.11282	7.78581	8.06734	7.86092	7.84621	7.51916	7.1964	7.59495	7.87337	6.63751
Akhr	GB53230	7.36826	7.45327	7.8094	7.39213	7.30314	7.53814	7.93311	7.42613	7.56006	7.68339	7.68649	7.38775	7.78301	7.37227	6.63751
Akt1	GB43135	8.02876	7.96307	8.07516	8.32553	8.19561	8.61799	8.27531	8.28788	8.09111	8.21736	8.41981	8.45934	8.37884	8.17411	6.92042
Aldh	GB49240	8.71375	8.74606	9.04395	8.89615	8.89776	8.5257	8.35313	9.35774	8.13883	8.44398	9.18501	8.81909	9.23914	8.41343	9.26564
Aldh-III	GB53314	9.55085	9.50421	9.88801	9.43547	9.44826	9.8047	9.49057	9.47524	9.68175	9.67645	9.35533	9.24549	9.82191	9.50087	8.56672
AlkB	GB53359	9.29565	9.33852	9.25082	9.5891	9.39327	10.0552	9.57338	9.69044	9.53591	9.64087	9.43164	9.4917	9.46017	9.56562	7.96709
Alr	GB42690	7.89351	7.7123	7.81686	7.98795	7.75861	8.15863	7.86893	8.06734	7.84772	7.85101	7.88428	7.74172	7.93094	7.8937	7.53695
AmCG12344	GB46030	4.78824	4.87089	5.47252	4.70239	5.4159	4.92327	5.08389	4.94791	4.20844	5.02403	5.00685	4.61837	4.93747	4.06067	5.81283
Amci	GB50121	7.3612	7.515	8.30476	7.17657	7.39108	8.09151	7.47013	8.4217	6.45277	6.60274	7.24188	6.47813	8.05493	6.67694	8.56672
Amel_6927	GB50282	8.29244	8.31476	8.24517	8.50088	7.75861	8.6764	8.49719	8.09766	8.25332	7.95727	7.91653	8.31626	8.49595	8.49993	6.63751
Amel_8916	GB45548	5.55136	5.30933	5.39273	4.90302	5.81987	4.54594	5.22185	4.74556	5.31001	4.95065	4.97859	4.8147	5.05627	5.30287	5.09416
Amih	GB47876	6.37133	5.92463	6.99625	5.98916	7.09026	4.65152	5.71193	7.60577	6.29209	6.53239	6.07368	6.82464	6.58731	5.56822	7.35931
Amph	GB43280	9.50201	9.32825	9.16285	10.0423	9.61496	10.2967	9.34766	10.154	9.16089	9.41159	10.3673	10.5336	10.4334	9.43078	9.77033
Ancr-1	#N/A	16.6401	16.6462	16.9836	16.4012	16.3859	15.8206	17.1024	16.616	17.2632	16.9028	16.4989	16.1967	16.5346	16.838	16.6594
Ank	GB46564	11.8998	11.5771	12.7578	12.2252	12.8474	10.064	11.4825	11.1539	12.8744	13.0101	12.6867	13.2419	12.4575	10.43	16.0812
Ank-1	GB44218	7.10626	6.84137	6.01152	6.17675	7.39881	5.60924	6.47192	5.6388	7.10703	6.31184	6.45424	6.82464	6.75614	6.52813	7.83748
Ant	GB42422	13.1006	13.0698	13.6171	13.7193	13.5416	12.9671	13.0127	13.6931	12.924	12.9738	13.0939	13.5553	13.1017	12.6527	13.2694
Antp	GB51292	4.36235	4.69965	5.35102	4.93963	4.93151	4.23122	4.70712	4.7816	4.5878	4.74659	5.37132	5.50548	4.87373	4.44797	6.63751
Aos1	GB49813	6.67564	6.76193	6.53367	6.94007	6.69662	7.09045	6.57504	6.76236	6.31802	6.87296	6.81651	6.97556	6.80556	6.75337	5.09416
Apamin	GB40697	2.82187	2.82187	5.30798	4.29179	4.04604	2.82187	2.82187	5.74665	3.27554	2.82187	2.82187	3.31389	2.82187	3.79276	2.82187
Apd-1	GB53115	7.55927	7.79421	10.693	9.22019	9.97012	8.26524	7.28561	9.52192	7.86529	7.00841	8.54651	9.74307	8.04471	7.80344	10.8622
Apd-2	GB53119	13.7878	13.7177	13.5735	13.6767	13.2415	12.9329	13.1126	13.1836	13.3169	13.3417	13.1492	13.7971	13.3368	11.8548	16.02
Apd-3	GB53114	4.54014	4.50093	8.9656	7.67514	8.41334	3.98699	3.50899	4.70846	5.79547	5.79192	7.6571	7.78586	6.63371	3.93632	8.48256
Apf	GB55295	5.49971	5.94292	5.93029	5.98916	5.69784	6.47624	5.73465	6.17543	5.79547	5.75073	5.69247	5.90228	5.8655	6.38141	2.82187
Apid1	GB47546	3.65356	3.48702	4.63936	3.47063	3.94466	2.82187	2.82187	3.42764	3.46087	2.82187	3.40863	3.5144	3.4242	2.82187	5.81283
Aplip1	GB44296	8.01983	7.94973	6.91493	7.02331	8.46208	7.18218	7.82797	7.11918	8.04176	7.10825	7.64431	7.97407	7.48831	8.1961	7.53695
Appl	GB48454	11.8629	11.9489	12.0802	11.5775	12.1105	12.0265	12.6242	12.4052	11.8383	12.3778	12.169	12.5772	12.0408	12.8522	12.5159
Aprt	GB54112	8.44697	8.61706	8.65201	8.57153	8.29416	8.98905	8.68657	8.44546	8.27648	8.5213	8.54422	8.33865	8.78695	8.68231	6.92042
Aps	GB55891	7.45703	7.36214	7.51111	7.68538	7.51721	7.6119	7.09994	7.51875	7.17211	7.338	7.61839	7.61896	7.77066	6.81171	7.83748
Arc-p34	GB52662	7.91294	8.25819	8.19452	8.45078	8.15969	9.29885	8.46417	8.69493	8.03012	8.35215	8.70867	8.62937	8.68979	8.4596	6.28431
Arc42	GB55568	8.75737	8.70433	8.70523	9.12945	8.61246	8.98905	8.43379	8.88261	8.42005	8.5511	8.75892	8.55166	8.8645	8.59813	8.19582
Ard1	#N/A	5.80541	5.8873	5.78349	6.26197	6.09487	5.7039	5.56717	6.26197	5.67906	5.59613	5.92483	5.72953	5.68112	5.90343	6.28431
Argk	GB54446	11.9863	11.9842	12.2947	11.9863	12.3012	12.6701	13.3399	13.0307	12.2287	12.9856	12.4212	13.0144	12.125	13.3665	11.7438
Arp1	GB44311	13.6721	13.5671	14.4964	14.126	14.0978	13.7658	13.3199	14.425	13.2765	13.6138	13.8667	14.5333	14.1195	13.1228	14.5628
Arp11	GB44879	7.23552	7.38216	7.41596	7.39213	7.23563	8.15041	7.34495	7.55808	7.30696	7.43723	7.54691	7.56929	7.54262	7.19772	7.15657
Arp5	GB47007	8.30352	8.31822	8.21726	8.4834	8.35498	8.25378	8.20509	8.4559	8.55331	8.34196	8.26428	8.07088	8.14697	8.08263	8.98894
Arp8	GB41769	7.82337	7.88579	7.85361	7.946	7.85726	7.5507	7.70326	7.43672	7.88265	7.62288	7.592	7.36609	7.78301	7.28251	7.83748
Arpc3A	GB44063	7.86387	7.96307	7.99848	8.10694	7.77652	8.71591	8.13547	8.50698	8.09484	8.20991	8.05494	7.90572	8.21234	8.49993	6.28431
Arpc4	GB44960	8.58954	8.59725	8.91784	8.77923	8.45839	9.17673	8.60108	8.6772	8.35627	8.77218	8.60701	8.87375	8.71362	8.4596	8.86146
Arr1	#N/A	8.36121	8.53015	8.66033	8.87396	8.87026	7.7103	8.6664	8.30531	8.48112	8.7389	7.64431	8.13626	7.11069	9.10165	8.39317
Arr2	GB51068	9.40424	9.43893	9.20324	8.98372	9.02546	7.80241	9.37988	9.25244	9.21667	9.34511	7.85869	7.6067	7.27732	9.13047	8.79323
Arr3	GB42604	8.97619	9.06737	9.1803	8.65459	9.16103	9.07838	9.39572	9.14531	9.18556	9.21156	9.09714	9.3261	9.14984	9.58864	8.92661
ArrL1	GB44203	6.68701	6.46821	7.15806	6.00578	6.27505	6.55349	7.60966	6.61113	6.40524	6.40683	5.60552	6.01917	4.9682	7.13068	6.28431
ArrL2	GB50763	9.37654	9.27224	9.34925	9.31053	9.34613	8.71313	9.21307	8.59696	9.21667	9.47203	9.28577	9.36296	9.45376	8.14614	10.4397
ArrL3	GB40785	8.5057	8.5509	8.50276	8.35788	8.3188	8.42368	8.67219	8.23734	8.49246	8.51828	8.55108	8.53883	8.71792	8.78014	8.64625
ArrL4	GB47767	7.12307	6.83168	6.98301	6.13213	7.57295	5.45386	6.52441	6.3771	6.85716	6.52032	6.72203	6.98508	6.85334	6.43821	8.56672
Art1	GB42079	7.96039	8.0448	8.11807	8.26541	8.2775	8.73252	8.08857	8.31107	7.90406	8.17204	8.36635	8.62331	8.43729	8.32641	8.29787
Art3	GB45666	6.5061	6.41713	6.45891	6.8877	6.63226	7.6119	6.70566	6.80396	6.33082	6.63665	6.89074	7.07694	7.11069	6.82593	5.09416
Art8	GB46727	6.03827	6.4807	5.8734	6.13213	6.15137	6.57834	6.00068	6.01352	6.22511	6.17956	6.3838	6.25928	6.32954	6.43821	5.09416
As	GB51221	8.90284	8.7791	8.54379	9.22546	8.91671	9.1848	8.72052	8.88647	8.66781	8.84134	8.97154	9.04686	8.9344	8.4596	7.35931
Ate1	GB45183	8.48963	8.49692	8.38725	8.29912	8.37861	8.61799	8.48736	8.38393	8.36556	8.33512	8.58043	8.20693	8.59729	8.62269	7.69504
Atf6	GB42112	8.03764	8.19177	8.38223	8.56877	8.3188	9.24198	8.70365	8.92642	8.2666	8.6342	8.85073	8.66524	8.96902	8.88197	5.09416
Atg1	GB53708	9.22751	9.16673	9.37474	9.59318	9.45753	9.40971	8.91629	9.2374	8.99934	8.99884	9.25949	9.64472	9.36214	8.55626	9.83962
Atg13	GB51866	8.09828	8.31822	7.77149	8.36107	8.15514	8.24994	8.04902	8.25837	7.90406	7.97057	7.96872	8.27816	7.84716	8.15178	7.83748
Atg2	GB44673	10.0111	10.0083	9.70721	9.60939	9.89841	8.95878	9.81376	9.44936	10.0816	9.85665	9.61736	9.25533	9.65403	9.34239	10.5471
Atg4	GB53958	8.23959	8.29028	8.21726	8.31897	8.19561	8.19105	8.24841	8.39754	8.46393	8.1911	8.15442	7.94518	8.25432	8.46414	8.08599
Atg5	GB49139	8.02876	7.88579	8.01803	8.19195	7.99107	8.70754	8.14384	8.38939	7.85653	8.08097	7.73955	8.24693	7.85107	8.1961	6.92042
Atg6	GB48638	7.65472	7.64766	7.21574	7.45934	7.03171	7.01984	7.5542	7.20848	7.47673	7.41143	7.36137	6.87673	7.00197	7.2513	8.08599
Atg8a	GB52790	11.8629	11.9249	12.0286	12.0291	11.8426	12.3325	12.0362	12.0885	11.746	11.7954	11.7223	11.9115	11.6418	12.0136	11.6213
Atg9	GB40500	10.0878	10.0619	9.66858	10.1579	9.75989	9.82806	9.80719	9.83933	9.87286	9.86853	9.96762	9.96548	9.8786	9.63965	9.96894
Atp5a1	GB41028	13.9686	13.9053	13.9677	14.5958	14.1606	13.1457	13.257	14.0569	13.6778	13.8253	13.8575	13.5322	13.6344	12.8664	14.1893
Atp5b	GB52736	13.8912	13.8097	13.8588	14.5801	14.1776	13.2425	13.3292	14.0674	13.708	13.737	13.7788	13.632	13.5915	12.9753	14.9667
Atp5c1	GB49306	11.8156	11.8653	11.8507	12.3632	11.8183	11.7277	11.4517	12.2626	11.5868	11.5804	11.6438	11.085	11.5593	11.6265	10.4172
Atp5d	GB51086	11.3075	11.347	11.3682	11.9145	11.4773	11.0018	10.8064	11.5548	11.2104	10.8104	10.9557	10.364	10.7807	10.996	10.9431
Atp5i	GB50601	8.10674	8.31476	8.03733	8.1666	7.58655	8.17493	7.74787	8.44546	7.70863	6.81497	6.81651	6.32101	7.03684	8.38978	7.15657
Atu	GB55009	7.49623	7.7123	7.69253	7.55182	7.45923	7.93279	7.82277	7.78629	7.75179	7.74146	7.61403	7.43706	7.87819	8.0162	7.96709
Aut1	GB54956	8.69425	8.83092	8.62677	8.88065	8.72424	8.58788	8.73443	8.79491	8.64512	8.70218	8.66085	8.53237	8.66555	8.45505	9.04869
Awh	GB53183	4.15136	3.63301	3.8153	3.47063	4.22255	4.07505	3.65958	3.42764	3.99458	4.19463	3.40863	3.79229	3.76433	3.93632	5.09416
Axin	GB47277	6.84757	6.70994	6.29648	6.7672	7.01165	6.80558	6.72818	6.45248	6.62848	6.71279	7.02199	7.23676	7.30617	6.08133	7.35931
B-gluc1	GB42685	9.20012	9.29174	10.2807	9.16278	8.80201	9.6761	9.18701	9.47524	8.90911	9.81059	9.1806	9.60527	9.45889	8.46414	9.10606
B-gluc2	GB42981	7.65472	7.74357	8.29944	7.83083	7.67196	8.99823	8.00836	8.24338	7.91675	8.54519	8.6545	8.22306	8.54268	7.5279	8.39317
B52	GB45167	12.7494	12.6393	13.1735	12.4516	12.8859	11.5199	12.5921	12.294	13.1103	12.666	12.2686	12.1605	12.4524	12.1703	14.689
BHD	GB44303	9.58755	9.60118	9.56167	9.32368	9.36399	8.92305	9.47076	9.2374	9.54819	9.3704	9.12805	8.7231	9.2451	9.40742	9.21438
BM-40-SPARC	GB43302	12.9461	12.7949	13.4842	13.2429	13.139	11.7149	12.4176	12.4687	12.6078	13.0258	12.8219	13.3873	12.9487	11.2762	14.9013
BMS1	GB50947	8.1646	8.22167	7.83168	8.02872	7.93903	8.82578	8.27149	8.25239	8.24663	8.48779	8.39205	7.94518	8.2661	8.24438	7.83748
BRWD3	GB51542	9.59207	9.68669	9.25906	9.05843	9.51016	9.46707	9.54051	9.02782	9.61717	9.61571	9.41795	9.37203	9.64166	9.58657	8.56672
BTBD9	GB54971	9.22945	9.0979	9.29421	9.26862	9.19025	8.50006	8.9114	8.82943	9.27201	8.85813	8.88371	8.62937	8.9027	8.83721	8.98894
Baiap3	GB54533	11.0486	11.0643	10.7956	10.6977	10.9156	10.5896	11.0088	10.7274	11.5506	11.0283	10.783	10.9655	10.973	10.3636	11.9614
Bap55	GB41598	7.3541	7.24311	7.23818	7.25437	7.16478	7.30595	7.04728	7.07914	7.29403	7.25337	7.25877	7.58187	7.33444	6.70801	6.28431
BaxI1	GB45181	12.1183	12.0538	12.3471	12.2129	11.9933	12.4804	11.9955	12.3094	11.8455	12.1233	12.0449	12.2228	12.1625	11.8745	12.7317
Bcas2	GB50083	7.39616	7.515	7.4738	7.39837	7.4065	7.58773	7.48338	7.51875	7.39435	7.34483	6.96818	7.12936	7.27149	7.69947	8.39317
Best2	GB48136	7.86387	7.84314	8.4022	7.92455	8.09934	7.86406	8.40624	9.98602	8.23317	8.60039	8.00583	8.4729	7.9925	8.64284	10.0295
Bet3	GB48414	8.44697	8.59153	8.57492	8.72819	8.49488	9.23617	8.4406	8.93763	8.31533	8.65356	8.56017	8.21098	8.56906	8.81607	7.83748
Bgb	GB45157	6.20666	6.49308	5.90213	6.02221	6.57861	5.24699	5.86373	5.74665	6.12566	5.39525	5.69247	6.60734	5.75102	6.05725	7.15657
BicC	GB56009	7.79223	7.82377	8.20593	7.21246	7.39108	8.82061	8.68371	8.70808	7.98262	8.62021	8.2973	8.54526	7.97107	8.92538	7.83748
BicD	GB42781	6.19069	6.17688	6.03759	6.90537	6.47956	7.56933	6.53724	6.34353	6.22511	6.41989	7.38207	7.53088	7.33444	6.59619	7.15657
Bili	GB44440	7.32536	7.16048	6.29648	6.68767	6.93915	6.57834	7.17548	6.33216	6.60766	6.43284	6.49299	6.78156	6.66084	7.29276	6.28431
Bka	GB47469	6.44031	6.33689	6.56963	6.71802	5.97459	6.88725	6.33155	6.63901	6.44103	6.39364	6.16082	6.29048	5.83374	6.72329	5.81283
Blimp-1	GB51060	4.48382	4.65292	3.63819	2.82187	5.28458	4.43016	4.75491	3.93565	4.44018	4.19463	4.76132	4.50704	4.06966	4.67126	2.82187
Blop	GB41643	5.33192	5.30933	5.6194	5.31418	5.28458	3.50654	4.84536	4.7816	5.11058	5.12694	4.15906	4.8147	4.13295	4.60131	6.28431
Br-c	GB48271	6.49318	6.57686	6.35959	5.14005	7.03171	6.56597	7.65722	6.72819	7.41241	7.56557	7.23051	7.78586	6.84549	8.10023	6.63751
Brd7	GB44636	8.65443	8.85018	8.59241	8.80995	8.78148	8.8076	8.67796	8.65925	8.68274	8.77723	8.73502	8.79231	8.70284	8.356	8.86146
Brd8	#N/A	7.27364	7.35541	7.28203	7.47714	7.41416	8.29538	7.58527	7.69225	7.19316	7.6116	7.91298	7.63715	7.92723	7.78179	6.63751
Bre1	GB46879	8.35057	8.58292	8.58369	8.75515	8.73038	9.21663	8.78343	8.89608	8.63492	8.64529	8.94228	8.86864	8.81727	8.64683	8.64625
Bsg	GB44726	11.9672	12.0135	12.4147	12.0157	11.9646	12.4344	13.3608	13.2265	11.9446	13.1931	12.5854	13.3985	12.3241	13.2776	12.4174
Bub3	GB53939	6.56899	6.63382	6.49678	7.09431	6.7582	6.78441	6.68278	6.4836	6.76627	6.61413	6.8241	6.85612	6.86891	6.41953	5.81283
Burs	GB45446	3.30644	3.29426	2.82187	3.83535	2.82187	3.50654	2.82187	3.25178	3.46087	2.82187	3.40863	3.31389	3.55697	3.38939	2.82187
Bx42	GB46255	8.99453	8.96286	8.9074	8.78162	8.52695	8.43049	8.80469	8.65473	8.79006	8.62862	8.75298	8.677	8.49095	8.57315	9.7344
Bzd	GB46532	8.71652	8.63661	8.31533	8.20267	8.34702	7.95656	8.50695	8.3619	8.79006	8.50311	7.99916	7.61896	8.14059	8.8921	6.92042
C1q-VP	GB43580	9.853	9.79003	10.6256	10.5404	10.3664	10.393	9.71339	10.2144	9.79256	10.292	10.8719	11.3794	11.3722	8.5857	10.8622
CAH1	GB46697	9.03053	9.06737	9.0183	9.21137	9.01293	9.43021	9.11014	9.64329	9.05204	8.66178	9.02508	9.27866	8.98335	8.99912	8.98894
CAP-D2	GB54609	8.10252	8.1842	7.89651	7.73551	7.69726	7.86406	8.20908	7.93179	8.41409	8.0395	7.58309	7.3588	7.86663	8.50874	7.69504
CAPN7	GB44742	7.40305	7.40843	7.40609	7.48889	7.67196	7.74895	7.39493	7.59636	7.35132	7.33113	7.51916	7.5438	7.58086	7.66044	5.81283
CBP	GB46142	5.62539	5.5937	4.30354	4.08921	4.30093	4.23122	4.30651	4.0086	4.07096	4.60614	3.97273	4.44723	4.45012	4.5271	2.82187
CCAPR	GB54316	5.47313	5.63963	6.1373	5.60707	6.40434	4.92327	5.92407	6.38812	5.46027	5.59613	6.03462	4.94423	5.66308	6.17374	2.82187
CCE-I1	GB44271	4.22632	3.95483	3.96189	4.08921	3.83097	4.30153	4.07936	4.25676	3.71846	4.5555	4.03877	4.50704	4.2491	4.17125	5.09416
CCS	GB46896	8.53733	8.55678	8.85039	8.44175	8.48403	8.57872	8.89168	8.69933	8.46681	8.42156	8.39714	7.97883	8.42683	9.18094	6.63751
CDC45L	GB41208	8.8383	8.7175	8.83211	8.49508	8.50206	7.7652	8.70081	8.3619	8.89849	8.55992	8.28363	7.93051	8.50343	8.93848	7.53695
CDase	GB40336	8.93643	8.73315	10.9011	9.83862	9.92137	7.21414	8.77269	10.1085	8.98536	9.75791	9.05755	10.1748	9.43563	7.03611	11.4435
CHORD	GB53068	6.17454	6.26639	5.93029	6.28927	5.81987	6.47624	6.12548	6.30915	5.88558	5.79192	5.69247	5.83997	5.75102	6.52813	2.82187
CLCN7	GB51847	9.44814	9.32653	9.12128	8.78638	8.88132	8.61799	9.00848	8.93016	9.01712	8.91424	8.61139	8.38958	8.81927	8.99599	7.35931
CNOT1	GB42495	9.37128	9.35883	9.46768	9.33996	9.59157	9.20477	9.20909	9.18034	9.37212	9.23928	9.39017	9.40245	9.38391	9.0633	10.0295
COX1	#N/A	8.36474	8.67492	9.20324	8.64676	8.43604	9.11684	8.70647	8.4533	8.85082	7.85101	7.69478	8.889	7.50829	9.06031	2.82187
COX2	#N/A	12.4955	12.8573	13.5859	12.5018	12.7291	13.5231	12.8941	12.4488	12.9372	11.9179	11.492	12.5141	11.832	13.5081	9.21438
CPF1	GB13601	5.17427	4.69965	4.7777	5.04365	4.04604	4.15604	4.84536	4.41143	4.63324	4.44732	4.49836	4.76843	4.62151	4.73746	5.81283
CPF2	GB10628	9.79924	9.71717	9.35182	9.76939	9.3894	7.36405	8.26	8.39754	8.31533	8.2613	7.44243	7.26826	6.96623	8.24964	10.4397
CPR1	GB18626	13.1362	12.8048	13.0668	14.0338	13.6222	12.3777	12.4767	10.642	12.5457	12.6297	13.2752	14.1369	13.4984	11.3163	16.7152
CPR11	GB42581	8.53419	8.29732	8.69312	7.81226	8.15514	5.50763	7.73685	5.84675	8.99735	8.14883	7.85869	7.97883	7.92352	6.49284	11.5194
CPR12	#N/A	3.65356	3.63301	2.82187	3.28253	3.83097	3.30825	3.89378	3.7696	3.82045	3.48776	3.40863	3.66611	4.00212	2.82187	5.09416
CPR14	GB46297	12.5	12.2446	12.9468	12.1648	12.2872	10.3755	11.9311	11.4843	12.6552	12.8028	12.1882	12.4453	12.1148	10.1828	15.1076
CPR15	GB45957	7.87876	7.76404	7.87522	7.32162	7.17383	7.62976	7.61569	6.26197	7.38219	8.53628	7.27547	7.79129	7.83534	6.84001	9.26564
CPR16	GB52920	7.96039	7.80413	7.84634	8.71577	8.25214	7.31334	7.86893	8.15645	8.04946	8.96824	8.34546	8.99848	8.76223	6.9217	9.16124
CPR17	GB46310	8.24726	8.0448	8.06892	7.80289	7.96007	7.36405	8.18901	6.72819	8.65019	8.5303	7.62274	8.12342	7.70725	7.07231	9.77033
CPR19	GB50453	7.60181	7.47828	8.9385	8.69566	8.57545	9.68466	8.13127	9.67712	8.07233	8.78226	9.69269	9.79254	9.92666	7.92037	9.36299
CPR2	GB48823	11.4241	10.8176	9.8576	10.9946	10.9436	9.4454	9.51817	3.7696	11.819	12.0149	11.5641	12.3836	11.1148	7.53655	15.7829
CPR20	GB45553	3.88621	4.11976	3.8153	3.61319	3.54253	3.30825	3.99103	4.07647	4.14197	2.82187	3.23819	3.79229	3.55697	3.93632	2.82187
CPR21	GB46311	2.82187	2.82187	4.84156	4.29179	4.44295	3.30825	2.82187	6.66635	3.27554	2.82187	3.40863	3.902	4.06966	2.82187	2.82187
CPR22	GB43670	9.21779	8.56555	10.0691	9.45054	8.88408	5.89594	8.31659	7.64738	8.78315	9.94571	9.71525	10.1423	9.58524	5.02485	11.7617
CPR23	GB52824	10.2027	10.1959	9.80607	10.0845	9.85276	10.5355	10.2751	9.87183	10.3006	10.5935	9.82495	10.2884	9.77943	10.3624	9.36299
CPR24	GB47903	8.41668	8.50302	7.86806	7.87174	7.61337	8.19904	7.96652	7.42613	8.09856	8.24681	7.60526	7.67286	7.50332	7.41982	9.58099
CPR25	GB42612	4.59393	4.26187	4.30354	4.65811	4.04604	3.50654	3.89378	3.56114	4.79994	5.22244	4.45565	5.062	4.4031	2.82187	5.09416
CPR26	GB48981	8.57133	8.53015	7.86085	7.88513	7.74048	8.44063	8.37105	7.79042	8.45236	8.38562	7.99245	7.71913	7.87819	8.08263	9.6209
CPR27	GB50438	9.27142	9.30226	9.00857	9.41103	9.17008	9.2669	9.1144	8.93203	9.47861	9.58579	9.21267	10.2187	9.27016	8.62269	9.83962
CPR28	GB52161	10.3264	10.3585	10.5934	10.0314	9.6542	11.3242	10.9288	10.5181	10.2597	11.0727	10.5834	10.7013	10.6169	10.6619	9.90573
CPR3	GB48832	15.7623	15.6223	14.7489	15.6291	15.2895	15.1695	15.1054	12.0933	15.2805	15.7379	15.7721	16.1205	15.4042	14.2698	18.0689
CPR4	GB48831	11.4563	11.5542	8.41209	8.87619	8.52695	9.69882	10.9492	7.57734	12.6312	12.0274	8.95267	8.69735	8.3292	9.30748	10.2491
CPR5	GB40299	13.5286	13.4293	13.1383	13.3391	13.367	12.9957	13.2944	13.0891	12.967	13.2994	12.2791	13.1298	11.9511	13.7112	13.4629
CPR6	GB40566	8.78397	8.83576	9.07849	8.70323	8.58902	8.92063	8.75369	9.42035	10.3591	9.40997	8.66297	9.00316	8.79713	8.73581	9.80539
CPR8	#N/A	6.64097	6.75168	7.02236	7.0553	7.08066	6.3079	6.65953	7.29255	6.72824	6.66978	7.1239	6.27496	7.28314	6.54545	8.08599
CPR9	GB42585	4.74243	4.74469	5.06936	3.28253	5.01852	4.07505	3.99103	4.31072	5.33623	4.70152	4.36521	4.76843	4.5809	4.17125	5.09416
CPTI	GB54622	8.72203	8.72535	8.07516	8.86048	8.56862	8.91094	8.55791	8.3619	8.57482	9.10309	9.39527	9.33911	9.26869	8.27052	9.04869
CREG	GB52115	9.45809	9.50421	10.1	10.0473	9.62816	9.85612	9.31286	10.0818	9.48714	9.6143	9.56185	9.65813	9.70896	9.49202	9.93768
CSN3	GB53338	7.80789	7.86225	7.65969	8.22389	7.96528	8.52252	7.66306	8.14036	7.77986	7.91203	8.17826	8.20286	8.12127	7.79626	6.63751
CSN4	GB49399	8.58954	8.82363	8.71324	8.96914	8.58564	9.3731	8.64593	8.93203	8.45236	8.59182	8.80172	8.78146	8.77052	8.65479	7.15657
CSN5	GB49413	8.46353	8.4908	8.48881	8.62567	8.35895	8.61202	8.54218	8.59696	8.20586	8.28278	8.48096	8.24298	8.54026	8.59813	7.83748
CSP1	GB43823	5.06992	5.12477	5.54792	5.17069	4.97574	4.88182	5.43373	6.01352	5.71896	5.3116	4.72702	4.67043	4.90599	6.2393	2.82187
CSP2	GB55547	10.8433	10.6478	11.1627	10.8333	10.9691	9.18077	10.488	9.87669	11.4052	11.2457	10.5346	10.6912	10.582	8.76552	13.0748
CSP3	GB52324	13.4548	13.5395	14.1834	13.1299	13.1133	13.3256	13.1981	13.477	13.159	13.2895	12.5692	12.6446	12.8801	13.1704	15.1879
CSP4	GB52326	4.36235	4.60434	5.30798	4.61218	4.73758	5.21468	4.80094	5.52184	4.49145	4.5555	4.69174	5.062	4.45012	4.17125	6.92042
CSP6	GB13325	11.9332	12.0834	9.94186	11.1999	10.41	12.5433	12.0345	8.84935	12.2915	12.1727	11.7464	11.4449	11.227	12.2536	12.287
CT-SOD	GB40203	10.466	10.5303	10.2466	9.89699	9.92806	9.54592	10.4017	9.55626	10.6669	10.3183	9.8976	9.32424	9.8358	10.1814	10.3236
CTL1	GB49260	7.97433	7.56254	7.95855	8.2517	7.70351	6.47624	7.04728	6.77915	8.48396	8.33169	8.05494	9.21153	8.37884	6.00783	9.87305
CTL11	GB43691	10.6369	10.6851	9.13627	9.58364	9.17908	9.87369	10.2865	9.28792	11.2009	10.9314	9.19088	9.43397	9.0948	9.13617	8.64625
CTL12	GB43983	8.42008	8.29381	8.84311	8.45676	9.03292	8.32489	8.57966	9.22373	8.4981	8.3248	8.02568	8.41438	8.38155	8.54773	9.65973
CTL2	GB45248	9.13342	9.00643	8.59241	8.01661	8.83369	7.03782	8.18901	7.66999	8.73143	8.10126	7.8879	7.95487	8.16595	7.95947	9.36299
CTL3	#N/A	9.89142	9.8318	9.22863	9.50209	9.39906	10.7348	9.81899	8.58274	9.77758	10.2796	9.90208	10.1675	9.92016	9.78086	10.3711
CTL4	GB47938	10.6296	10.3678	10.7574	10.5326	10.7238	8.38568	9.76445	9.26733	10.7239	10.7378	10.3172	10.7291	10.3796	8.48661	13.2819
CTL5	GB40445	11.3816	11.2952	8.86845	9.79205	9.20353	10.4477	10.951	6.96656	11.6978	11.5017	10.1919	10.4418	9.69814	9.69665	12.9074
CTL6	GB55225	9.3483	9.26866	8.96895	8.38951	8.59911	7.97064	9.00159	8.43758	10.1672	9.8253	8.74502	8.55166	8.76638	8.16856	10.608
CTL7	GB52656	13.2421	13.2263	13.7386	13.3252	13.0468	14.1155	13.6338	13.7927	13.062	13.2238	13.0603	13.8576	13.4845	13.5636	13.0997
CTL8	GB51399	9.6683	9.67324	9.16577	9.47434	9.57633	9.47696	9.39046	9.22373	9.5318	9.50132	9.77017	9.81931	9.83777	9.24823	9.26564
CTR9	GB55652	8.71375	8.75119	8.77964	8.47162	8.44726	8.57566	8.59804	8.48931	8.69015	8.61458	8.56244	8.677	8.59496	8.47317	9.77033
CUBN	GB53104	7.60181	7.36885	7.9919	7.26124	7.51721	5.74892	6.97392	6.70201	7.77522	7.82683	5.74214	5.88182	6.60605	5.93027	10.5677
CUTA	GB43633	7.3326	7.21361	6.94255	7.44132	7.33574	8.42368	7.38083	7.65193	6.97542	7.18645	7.26436	7.26045	7.30617	7.8458	6.92042
CYLD	GB45155	9.08717	9.01499	8.57931	9.38773	8.83938	9.49329	9.03345	9.13884	9.02495	8.90503	9.48634	9.4183	9.38795	9.31754	7.69504
CYP15A1	GB48175	4.15136	4.50093	4.7777	4.78649	4.30093	3.65661	4.55158	4.25676	4.71937	4.32807	3.97273	4.17062	4.5809	4.17125	2.82187
CYP18A1	GB54765	6.14169	5.94292	8.33625	8.25514	8.45098	7.41303	7.26271	5.3016	5.63799	6.50814	7.79843	8.70885	8.52074	6.57948	9.93768
CYP301A1	GB46015	7.64893	7.68034	6.70503	6.46699	6.34117	6.21561	6.94541	6.17543	8.00261	7.61725	6.80119	6.39459	6.41721	6.40059	8.08599
CYP302A1	GB47901	10.1647	10.1855	10.3219	9.51934	9.91466	9.10838	10.1238	9.83033	10.2497	10.215	9.3825	8.65636	9.50183	10.267	8.92661
CYP303A1	GB47752	4.36235	4.19318	3.96189	3.28253	3.33407	3.89004	4.07936	2.82187	5.93698	4.95065	3.23819	3.79229	3.66773	3.61945	2.82187
CYP305D1	#N/A	5.14039	5.52181	5.84407	5.92063	5.6721	6.15057	5.46147	6.23778	5.33623	5.59613	5.74214	6.01917	5.50963	6.10501	5.09416
CYP306A1	GB54743	6.20666	5.63963	6.23044	5.60707	5.38424	3.65661	5.22185	4.14006	6.61811	6.29774	5.43372	5.83997	5.11187	3.38939	8.86146
CYP315A1	GB53709	4.91653	5.05711	5.21757	4.56446	5.13911	5.3979	5.43373	4.88395	5.412	5.12694	5.21347	4.72039	5.08436	5.12411	5.09416
CYP334A1	GB42898	4.69488	4.8302	4.84156	4.46291	4.04604	3.50654	4.07936	3.6725	3.91163	4.44732	3.40863	3.66611	3.55697	3.79276	5.09416
CYP336A1	#N/A	8.69705	8.57426	8.52114	7.65964	8.04129	7.46704	8.84371	8.26432	7.34507	9.43255	7.61403	7.79669	7.4578	7.13068	7.53695
CYP342A1	GB47885	3.88621	4.19318	4.08877	3.83535	3.54253	3.65661	4.07936	3.85651	3.82045	4.26337	4.03877	3.79229	4.2491	3.79276	2.82187
CYP343A1	GB43693	7.42353	7.5449	7.13432	6.85169	6.61904	7.17408	7.33034	6.60171	7.32614	7.18645	7.04815	7.02253	6.95898	7.28251	5.09416
CYP49A1	GB46062	6.75341	6.64495	5.98496	5.39349	5.4771	5.11278	6.03748	5.41615	6.85716	6.56799	5.75831	5.39287	5.19113	5.84818	5.81283
CYP4AV1	GB44513	8.73845	8.88095	9.15109	8.45676	8.7991	9.93596	9.28855	9.26733	8.96107	9.2301	9.37994	9.29783	9.37578	8.97071	9.7344
CYP4AZ1	GB47270	6.29884	6.28077	6.29648	5.77265	7.16478	7.42673	7.03832	6.4733	6.53232	6.84426	6.25426	6.64392	6.60605	7.75239	5.81283
CYP6AQ1	GB52023	7.04583	7.515	5.8141	6.83334	6.87394	6.44953	6.65953	7.42081	6.11087	7.46258	6.99534	6.32101	5.92695	6.76818	6.92042
CYP6AR1	GB51383	6.09093	6.08132	5.47252	4.29179	4.44295	5.83481	6.28658	4.67022	5.28327	4.87289	5.08815	5.4219	5.16523	5.34409	5.09416
CYP6AS11	GB49876	4.54014	4.91033	7.53847	6.69786	6.40434	4.83899	3.99103	7.37748	4.38654	3.75558	4.82725	5.4219	4.87373	5.56822	2.82187
CYP6AS13	GB40287	5.03322	5.18915	5.21757	5.28668	6.01583	5.65738	5.51534	6.2975	5.90292	5.72967	5.4934	4.76843	6.0284	6.08133	5.81283
CYP6AS15	GB45746	7.54064	7.43422	8.31005	7.22656	7.28656	8.82836	8.39578	8.75109	8.01446	8.39879	7.49562	7.22878	7.97825	8.49107	7.35931
CYP6AS17	GB49892	4.48382	3.86033	5.6194	4.46291	5.28458	5.48101	4.84536	5.0953	5.43634	5.94552	4.85898	3.902	4.19261	5.17109	2.82187
CYP6AS3	GB49887	6.31364	6.01382	6.96965	6.39353	6.25803	6.65038	6.65953	7.19606	5.93698	6.59125	6.53998	6.07417	5.9419	6.00783	6.63751
CYP6AS4	GB49885	6.7206	7.05626	6.70503	6.5594	7.13729	8.13382	7.45	7.03795	7.36375	7.46884	7.49086	7.53736	7.26562	6.69256	8.48256
CYP6AS7	GB49894	9.35186	9.42775	9.35694	9.51505	9.35211	10.2085	9.76173	9.79481	9.52629	9.46422	9.73547	9.44605	9.72184	9.82737	8.08599
CYP6AS8	GB49878	6.91675	6.91664	7.27119	6.5594	7.75259	4.79468	5.04704	7.8939	5.17065	6.01644	6.80119	5.39287	6.51971	5.73064	5.09416
CYP6BC1	GB48993	5.82636	6.11389	5.78349	6.20573	6.07552	5.83481	6.38937	6.28575	5.81396	6.19488	6.02135	6.1271	5.71651	5.34409	5.09416
CYP6BD1	GB47279	5.10562	5.25058	5.68738	5.51621	5.13911	6.36626	6.37513	6.21317	5.52962	5.39525	6.04776	5.70635	6.30675	5.81971	2.82187
CYP6BE1	GB46814	3.65356	3.29426	3.40289	3.28253	3.83097	3.78146	2.82187	3.56114	3.46087	3.63391	3.64614	2.82187	3.24932	3.61945	2.82187
CYP9Q1	GB43713	7.32536	6.67781	8.68906	7.97131	8.26488	5.53374	6.83574	7.2208	7.77522	8.85813	7.55604	8.13199	7.50332	4.80033	11.1482
CYP9Q2	#N/A	9.3067	9.06942	9.78531	9.64912	9.4333	9.6177	9.12077	10.2724	8.64258	9.19467	9.18648	10.0762	9.80184	8.94173	9.45418
CYP9Q3	#N/A	5.7406	5.5937	6.1373	5.82999	5.61914	4.15604	4.43549	5.00887	5.412	5.19136	5.28338	5.75233	5.42597	3.38939	6.63751
CYP9S1	#N/A	9.42804	9.14155	10.1212	9.89148	9.73571	9.44876	9.70776	9.83634	9.57244	9.62414	9.54706	10.122	9.89574	9.21632	10.6853
Ca-beta	GB40089	7.37528	7.14493	6.82871	6.79592	8.35498	6.3079	6.72818	6.50398	7.20011	6.95575	7.3974	8.44221	7.3456	7.41044	9.26564
Ca3	GB50250	4.22632	4.44565	3.96189	3.92777	4.04604	3.50654	3.78484	3.56114	3.99458	4.12114	3.74043	3.99992	4.06966	2.82187	5.09416
CaMKI	GB46266	8.9808	9.03617	9.59241	9.49919	9.51372	9.9968	9.28478	10.0425	9.01516	9.26647	9.8967	9.92292	9.95511	9.02698	8.56672
Cac	GB51897	7.95571	7.70702	6.72109	5.22993	9.0354	6.35189	6.91632	6.4836	8.03012	7.26061	8.03223	8.94356	7.55227	7.78904	7.35931
Cad	GB48966	7.77109	7.57418	8.53477	7.90716	8.16423	6.96451	7.69189	7.46286	8.29279	8.19488	7.79458	8.18238	8.16909	6.9217	10.1158
Cad99C-like	GB49977	8.57438	8.4535	8.53024	8.05658	8.62239	7.39921	8.03109	7.93179	9.14121	8.98362	8.5647	8.62937	8.49345	7.70715	10.5263
CadN	GB45972	8.79448	8.44402	8.28875	8.01661	9.24482	7.32801	8.56104	7.27495	9.44398	8.9211	8.68392	9.4183	8.43989	8.594	10.9743
Caf1	GB42106	8.35057	8.34224	8.48414	8.78162	8.39028	9.07187	8.31289	8.57798	8.07611	8.48779	8.72292	8.89908	8.86062	8.11762	7.96709
Caf1-105	GB53136	7.30342	7.23579	7.4355	7.28165	7.04164	7.58773	7.60966	7.31569	7.42432	7.4813	7.37692	7.14641	7.44748	7.58739	5.81283
CalpC	GB42487	10.4386	10.4307	9.51888	9.5093	9.56093	9.28578	10.3006	8.72112	11.1214	10.7319	9.72135	9.44089	9.48557	9.54436	11.4765
Calpb	GB43448	9.80964	9.69337	9.93673	9.80735	9.75689	9.68324	9.55782	9.83634	9.77642	9.70057	9.85667	10.0751	9.99721	9.4469	10.588
Calx	GB48665	5.69565	5.05711	6.23044	5.31418	6.13279	3.30825	5.18868	4.7816	5.07949	6.33963	5.83646	6.84571	5.13881	3.61945	7.15657
Camkii	GB49535	8.75199	8.55384	9.12128	8.92017	9.69553	8.1668	8.6664	8.83343	9.33322	9.19655	9.34879	9.90928	9.10467	8.49993	10.8951
Camta	GB48002	7.98813	7.68572	7.78677	7.65964	9.10785	6.60276	7.88898	7.57734	8.06475	8.43441	8.53962	9.26704	8.0785	7.76716	9.53995
Cap	GB50997	9.24485	9.35378	9.18894	9.05053	9.17459	8.93266	9.45573	9.05381	9.54683	9.25566	9.11731	8.67113	9.27308	9.59279	9.26564
Caps	GB55495	9.84164	9.71586	9.00857	8.74785	10.1807	9.17268	9.60552	8.71679	9.8499	9.29669	9.61409	9.92415	9.83481	9.79173	10.6853
Cas	GB45360	7.34697	7.24311	7.27119	7.21953	6.94973	7.38525	7.29316	6.97386	7.23436	7.40491	7.11774	7.30668	7.13019	7.29276	5.81283
Cat	GB44682	12.5852	12.5937	12.7012	12.2502	12.457	11.381	12.3077	12.1235	12.6363	12.0884	11.8023	11.3703	12.0194	12.1934	13.8713
Catsup	GB48408	9.5739	9.58977	9.75458	9.72793	9.48861	10.4334	10.006	10.0977	9.59234	9.86498	9.91808	9.82593	9.91362	10.1924	7.15657
Cbp80	GB44934	8.72203	8.95843	8.65617	9.31876	8.83654	8.9798	8.76186	8.94875	8.78776	8.70484	8.76286	8.91902	8.78695	8.73206	8.86146
Cbs	GB55902	8.34343	8.28675	7.90354	8.35788	8.08983	8.61202	8.24063	8.24338	8.05712	8.23584	8.3895	8.47963	8.6112	8.32641	5.81283
Ccap	GB50604	4.07062	4.38763	4.39697	4.08921	4.30093	4.15604	4.07936	4.36219	3.60138	4.12114	3.90178	4.17062	3.92953	4.17125	5.09416
Ccar1	GB47589	9.44147	9.48586	9.02476	9.22721	9.25123	9.57076	9.75083	9.47524	9.55362	9.60154	9.55505	9.1601	9.5946	9.91941	8.86146
Cct5	GB50652	9.65683	9.59263	9.92471	10.2348	9.86953	10.0082	9.32394	9.7876	9.38434	9.64915	10.0825	10.4453	10.1724	8.84766	10.0295
Cctgamma	GB45761	10.2406	10.2791	10.2383	10.5984	10.1456	10.9399	10.1206	10.5125	10.1314	10.2635	10.5277	10.6904	10.566	9.93746	10.4618
Cda4	GB45318	10.1006	10.1817	10.3297	10.0091	9.63798	10.3542	9.98176	10.0012	9.80057	10.2509	10.0571	10.0728	10.2117	9.81677	10.1973
Cda5	GB51063	11.4938	11.2842	10.7231	10.74	10.6553	10.2902	11.0394	9.67712	11.8745	11.9789	11.0787	11.4223	10.5433	9.97131	14.1959
Cdc27	GB48434	7.1884	7.08099	6.63893	7.42307	7.16478	7.51269	7.1998	7.05182	6.81244	7.14788	7.45224	7.49807	7.48327	7.30295	6.92042
Cdc37	GB52345	8.68298	8.66408	8.61826	8.98372	8.76066	9.42851	9.48399	9.42301	8.53423	9.50589	9.39017	9.18708	8.83319	9.94883	7.69504
Cdc42	GB45657	8.52476	8.37253	8.55722	8.57153	8.35101	9.30256	8.68371	8.80106	8.43776	8.72328	8.74702	8.88394	8.79307	8.66665	6.92042
Cdc6	GB45046	5.67262	5.61686	5.47252	5.67149	5.69784	6.35189	6.19213	6.08326	5.77673	5.98143	6.39408	5.83997	6.10991	6.17374	2.82187
Cdk4	GB48243	6.02027	6.23717	4.48338	4.65811	4.68406	4.59987	5.15466	4.45867	6.09592	5.12694	4.69174	5.3632	4.66082	4.80033	2.82187
Cdk5	GB43092	8.47989	8.30781	8.30476	8.03673	8.24787	7.29105	7.9806	7.90917	8.04176	7.99681	7.73554	8.05294	7.57614	7.62843	7.83748
Cdk5alpha	GB55798	6.53159	6.29501	4.08877	5.39349	8.06576	4.23122	4.80094	4.0086	6.61811	5.15954	6.47375	7.18819	5.69893	4.36308	5.81283
Cdk7	GB52164	7.74964	7.84794	7.945	7.95871	7.70974	8.03904	7.78045	7.98323	7.79827	7.89818	7.74355	7.65511	7.76652	8.27052	5.81283
Cdk9	GB53271	7.43703	7.53897	7.4355	7.82157	7.68466	7.9892	7.44323	7.67893	7.48244	7.6116	7.8251	7.91071	7.68986	7.51044	6.28431
CdsA	#N/A	8.72478	8.73315	8.25619	8.77445	9.01795	8.46071	8.71211	8.53186	8.61948	8.59182	8.8433	8.7896	8.87414	8.69007	6.92042
Ced-12	GB44082	8.59256	8.63661	8.35686	8.2309	8.51278	8.53204	8.36391	8.36744	8.30893	8.23584	8.19003	8.03477	8.34871	8.39454	8.08599
Cep97	GB55381	8.12351	8.21053	7.8094	8.08778	7.94432	8.43388	8.35673	8.12409	8.17802	8.0395	8.19588	7.86	8.43989	8.75074	6.92042
Cetn2	GB51635	5.96486	6.25186	6.38001	6.41844	5.84305	6.44953	6.33155	6.38812	6.41727	6.06739	5.85158	6.07417	5.80123	7.07231	5.09416
Chaf1a	GB43403	6.41312	6.45561	6.63893	6.47888	6.49414	6.5282	8.15216	7.16453	6.92592	7.93483	7.37176	7.09462	6.35197	8.70548	7.83748
Chd1	GB52346	10.9697	10.9957	10.3594	10.433	10.444	10.6521	10.9599	10.4713	10.7828	11.0048	10.9605	10.7494	10.9324	11.215	10.2234
Chd64	GB51551	11.25	11.3504	11.8687	11.4366	11.239	11.92	11.3182	11.5353	11.0546	11.2647	11.2789	11.6286	11.4218	11.7314	10.8285
Chmp1	GB53881	8.12351	8.16509	8.01803	8.40198	8.12285	8.60902	8.17683	8.41636	7.69886	8.08505	8.23901	8.23902	8.25728	8.21237	6.92042
Chro	GB46479	9.39218	9.37554	9.77578	9.38302	9.6298	9.4454	10.1899	9.8931	9.68051	10.0846	9.82966	10.3299	9.64617	10.4779	10.6663
Cht11	GB47539	8.35767	8.31129	7.80189	8.43267	8.88682	8.32124	7.83315	7.95406	8.16743	7.55971	8.43225	8.52263	8.35423	8.43208	7.69504
Cht3	GB43173	6.73162	6.62261	9.77387	7.56297	8.87026	5.74892	6.1592	11.8294	6.52122	6.76479	6.25426	6.83521	7.26562	5.98244	7.83748
Cht5	GB53565	5.84701	5.5937	6.01152	5.49253	5.81987	5.33953	5.75701	8.10763	7.18618	6.49587	5.60552	5.3632	5.40423	5.12411	7.35931
Ci	GB54885	7.38924	7.26485	7.21574	6.8877	7.39108	6.80558	7.08261	7.34411	7.71349	7.06749	6.8615	7.00393	7.16841	7.2086	7.69504
Ciao1	GB44782	7.08067	7.20614	7.54748	7.62281	7.2528	6.63862	6.76131	7.18981	7.1579	7.17115	7.1841	7.40909	7.24193	6.51059	7.69504
CkIIalpha	GB43105	9.62629	9.59976	9.86121	9.94992	9.89841	10.1092	9.8589	9.79276	9.65425	9.74765	9.95991	10.108	10.0501	9.79713	8.92661
CkIIbeta	GB49083	9.3483	9.36554	9.53705	9.67502	9.37186	10.1683	9.47408	9.85024	9.38434	9.61147	9.65711	9.80867	9.66408	9.56562	8.19582
Cka	GB48367	9.85174	9.81475	9.80232	10.1376	10.0738	9.74046	9.60097	9.79994	9.56575	9.6899	9.90743	9.99161	10.0586	9.55715	10.4397
Clc	GB41446	8.58652	8.56263	8.82473	8.81228	8.58564	9.13153	8.46083	9.04865	8.2666	8.19865	8.62663	8.76778	8.73707	8.87517	8.48256
Clic	GB41604	9.01489	8.95398	9.57493	9.34642	9.49222	10.1785	9.85763	10.5832	9.46572	9.82286	9.96077	10.3392	10.0243	9.71579	10.4618
Clk	GB48028	7.84881	7.93175	8.14203	8.2517	8.14139	8.04348	7.58527	7.88619	7.84772	7.8558	8.43472	8.44565	8.30372	7.31306	9.53995
Clp	GB54279	6.83741	6.79224	7.06066	7.3347	7.10925	6.32272	6.61187	6.76236	6.69904	6.66978	6.80887	6.59493	6.75614	6.19593	7.69504
CoRest	GB52614	7.1884	7.03953	7.20439	7.30842	7.37548	7.82325	7.16728	7.44723	7.28752	7.41143	7.72343	7.92064	7.55708	7.5192	6.63751
Cog3	GB51968	7.14792	7.50894	7.04801	7.21246	6.98103	7.91348	7.24724	7.29255	7.30051	7.07573	7.34037	7.36609	7.32883	7.83182	5.09416
Cog7	GB52588	8.35057	8.4152	8.57931	8.36107	8.35101	8.59395	8.56727	8.61104	8.70486	8.52731	8.50471	8.11046	8.50592	8.60226	7.96709
Con	GB53374	6.77488	6.55342	5.6194	6.17675	7.17383	7.12449	5.94362	6.22553	6.40524	6.01644	7.14223	7.51785	7.36766	6.75337	5.81283
Coq2	GB46022	7.22777	7.24311	7.27119	7.72065	7.41416	7.6119	7.09994	7.64738	6.96729	6.86345	6.99534	7.09462	7.05736	7.18676	7.15657
Coq7	GB44464	8.57743	8.45034	8.53024	8.54369	8.20886	7.66483	8.15216	8.3168	8.07611	7.97498	8.0025	7.58812	8.02752	8.11185	8.48256
Cox10	GB45820	10.8552	10.8394	10.909	11.4692	10.9593	10.9262	10.5624	11.2571	10.7817	11.0546	10.8118	10.6671	10.5785	10.3192	9.90573
Cox4I1	GB42929	12.2448	12.2927	12.1757	12.6829	12.2893	12.5686	12.0637	12.7911	12.2725	12.2385	12.0876	11.7259	12.0024	12.2971	11.9379
Cox5a	GB44462	12.7904	12.798	12.5654	13.1506	12.7606	12.5635	12.4385	12.9195	12.6894	12.5211	12.401	11.9109	12.1892	12.6208	11.0493
Cox5b	GB47610	9.89874	9.85582	9.81355	10.2235	9.58651	8.8232	9.0357	9.71996	9.38434	8.74922	8.78824	8.00707	8.87222	9.23767	11.2149
Cox6a1	GB53749	9.73253	9.95366	9.32853	10.0253	9.15648	9.44204	8.7941	9.67601	9.14301	8.4754	8.39714	7.62505	8.50343	9.15031	9.80539
Cox6b1	GB18028	8.30352	8.50302	8.26167	8.55768	8.20446	8.69063	8.41318	8.52939	8.33437	7.86532	7.84013	7.84964	7.89725	8.67058	8.56672
Cox6c	GB51206	7.09778	7.26485	6.85803	7.23357	6.68398	6.98319	6.41742	7.10596	6.53232	5.22244	5.43372	5.27011	5.76796	7.01146	6.63751
Cp190	GB49841	8.72203	8.72535	8.7012	9.05251	8.8591	8.80499	8.93087	8.83543	8.78546	8.73631	9.05111	8.77873	9.05125	8.594	9.90573
Cpap3-a	GB50636	8.70821	8.53908	8.14796	7.72065	7.47395	7.09903	7.9806	7.16453	8.98134	9.0203	7.81373	8.12342	7.68986	6.70801	10.6277
Cpap3-b	GB41227	8.8383	8.32513	8.93165	8.5493	8.49847	6.2778	8.18901	7.85102	9.57378	9.5655	8.46893	8.89656	8.41895	5.56822	11.1886
Cpap3-c	GB41203	11.2713	10.837	10.8566	11.3056	10.8239	9.91672	10.4522	10.4603	11.14	11.7029	11.4674	11.9056	11.4658	8.85804	13.3576
Cpap3-d	GB41946	7.3326	6.9706	7.56532	7.80758	7.128	5.24699	6.34623	6.01352	7.35755	7.93483	7.18999	7.52438	7.28893	4.91746	9.65973
Cpap3-e	GB52854	6.00204	5.92463	6.85803	7.07103	6.27505	7.48678	6.77218	6.61113	5.88558	6.75454	6.8541	7.49142	7.08427	6.32223	7.15657
Cpsf100	GB40901	8.58046	8.49386	8.61826	8.13708	8.34302	8.46403	8.47416	8.23432	8.15321	8.27566	8.30002	8.08861	8.40037	8.33634	8.19582
Cpsf160	GB43480	9.11048	9.12385	8.87204	8.57979	9.01293	8.33581	8.98307	8.4217	9.15555	8.88177	8.69015	8.35705	8.74551	8.9579	8.86146
Cralbp	GB45850	7.00105	7.15272	10.2847	7.92455	9.02795	5.55937	7.02929	11.6195	8.6143	7.73107	6.76215	7.02253	7.57614	5.34409	9.45418
Crc	GB40461	12.0621	12.1153	12.341	12.0811	11.9304	12.9402	12.1519	12.1054	11.8139	12.0687	12.137	12.2048	12.3403	12.3511	11.0346
Creb	GB46492	8.90284	8.74349	8.53477	8.83543	8.3864	9.61621	8.77807	8.9432	8.63748	8.55699	8.77463	8.90908	8.7413	8.93194	7.53695
Cript	GB41583	5.71831	6.0977	6.27481	6.10159	6.18783	6.33738	6.0192	6.35481	5.79547	5.90866	5.7901	5.6344	5.7847	6.28137	5.09416
Cry2	GB51095	9.44147	9.47969	9.66031	9.62807	9.52611	9.25545	9.33859	8.81936	9.37058	9.16991	9.51468	9.44948	9.56513	9.18094	10.3943
Cryl1	GB40673	8.75737	8.85734	9.59024	9.1536	9.12889	10.2388	9.21506	9.95877	8.6628	9.66423	9.50412	9.4357	9.73566	8.89546	9.53995
Crzr	GB44824	4.54014	4.65292	4.20153	4.16112	4.22255	3.98699	3.65958	4.50407	3.91163	3.86146	4.15906	3.66611	3.66773	3.79276	2.82187
Csat	GB40778	7.32536	7.31432	7.11019	7.55741	7.24424	7.84889	7.26271	7.51376	7.0154	7.29631	7.47168	7.6067	7.53776	7.60395	2.82187
Csd	GB47022	6.62922	6.73096	6.47797	6.61425	6.7582	7.2684	6.68278	7.33281	6.49877	6.31184	6.94747	6.38017	6.87664	6.88143	5.09416
Csk	GB51226	10.2435	10.28	11.1121	10.5628	10.7542	10.7133	10.5794	11.5202	10.0503	10.3851	10.5552	10.9649	10.7344	10.7784	10.9113
Csnk1a1	GB50193	8.52476	8.44402	8.17724	9.10299	8.82798	8.92546	8.18901	8.44284	8.40211	8.45663	8.96642	9.04912	8.8645	8.17411	8.29787
Csp	GB49934	7.19636	7.40843	7.12231	7.55182	7.53135	7.23765	7.1998	7.12575	7.12905	7.18645	7.63141	7.93541	7.58558	7.19772	7.35931
CstF-64	GB44830	8.25489	8.18799	8.29944	8.33531	8.23066	7.39225	7.91366	7.87845	7.99065	7.89353	7.66133	7.84964	8.12127	7.31306	8.79323
CtBP	GB43266	6.3854	6.14574	6.45891	6.44292	6.65836	6.24705	6.40347	6.1497	6.40524	6.89177	7.10533	7.69038	6.98778	6.12829	7.83748
Cwc25	GB53190	7.80789	7.78423	7.77915	7.73551	7.61337	8.28039	9.39046	8.95244	8.16389	9.25746	8.86548	8.45593	8.11802	9.78086	6.92042
Cyc	GB43953	7.67762	7.58573	8.23407	8.04072	7.80005	7.5507	7.74237	8.26135	7.9083	8.1133	8.15142	8.40734	8.42683	7.10761	9.69755
Cyc1	GB46369	11.8962	11.867	11.8597	12.5227	12.0091	11.1153	11.3028	11.9191	11.6926	11.5713	11.7188	11.2187	11.4459	10.9628	12.2493
CycB3	GB45077	6.22244	6.23717	5.65381	6.61425	6.38881	6.77371	6.48523	6.50398	6.48741	6.63665	6.89074	6.74837	7.05736	6.61271	2.82187
CycC	GB43479	8.58954	8.71225	8.65201	8.52387	8.59239	8.49357	8.54218	8.55874	8.63492	8.32825	8.23049	7.85483	8.0785	8.63883	7.15657
CycD	GB40554	4.48382	4.8302	4.90237	4.93963	5.5067	4.70109	4.49496	4.45867	4.91196	4.87289	5.60552	5.39287	5.50963	3.93632	5.81283
CycE	GB42872	5.27105	5.39293	5.35102	5.17069	4.93151	5.48101	5.48867	5.06711	5.01503	4.91236	5.06161	5.4219	5.19113	5.17109	2.82187
CycG	GB54386	9.69658	9.76488	9.56389	9.85343	9.80997	9.71423	9.7766	9.751	9.66681	9.61289	9.59209	9.61294	9.56513	9.82208	9.58099
CycH	GB40098	7.51543	7.60856	8.1301	7.75994	7.96528	7.39225	7.97592	7.73147	8.2699	7.96615	7.52847	7.37335	8.14697	8.57735	7.15657
CycK	GB46681	7.24322	7.25039	7.39615	7.56297	7.57295	7.50626	7.02929	7.28671	7.09961	7.16343	6.8541	7.22878	7.14304	7.09594	7.53695
CycT	GB49026	5.90717	6.06474	5.65381	6.23413	6.43491	6.32272	6.30173	5.87858	5.73848	6.31184	7.05462	7.3588	7.00901	6.41953	2.82187
Cyp314a1	GB45651	6.07359	5.74822	6.18463	5.22993	5.99536	5.21468	5.71193	5.58156	6.12566	5.83192	5.51274	5.90228	5.8655	4.73746	6.92042
Cyp4g11	GB51356	9.7298	9.65966	11.9671	11.6491	11.1792	10.6866	10.4353	11.0562	9.54138	9.82773	11.1865	12.1555	11.7505	9.26652	11.0493
Cyp6as5	GB49890	3.77799	3.95483	5.06936	4.40866	4.68406	4.43016	5.11974	5.03831	4.44018	4.91236	4.53959	4.72039	4.93747	4.67126	2.82187
CytC	GB48784	11.2992	11.3427	12.0136	12.2649	11.7528	11.527	10.9617	12.5903	11.1663	11.068	11.4381	11.3879	11.2911	11.2344	11.6311
D-PIAS	GB40911	7.34697	7.31432	7.51111	7.52925	7.50293	7.67633	7.4089	7.49868	7.26119	7.26782	7.77125	7.61896	7.72444	7.39148	7.96709
DAAM	GB42894	9.40766	9.37388	9.12429	8.53805	9.07449	8.0166	9.32578	8.4559	10.4294	9.99531	8.82832	8.97486	8.56906	8.87517	11.2279
DDX17	GB43623	7.76576	8.1261	8.21726	7.80758	8.04129	7.67633	8.22099	7.97599	8.06854	8.17587	8.20461	7.95487	8.15015	7.76716	9.04869
DEG4	GB46186	5.69565	5.97882	4.96044	5.79202	4.7889	5.42616	5.75701	4.91632	6.00273	6.01644	4.65544	5.17011	5.13881	5.69964	6.92042
DEG5	GB48330	4.99547	5.18915	4.30354	4.82653	4.37415	4.43016	5.51534	5.1229	5.17065	4.65475	4.53959	4.85934	5.62628	5.30287	5.09416
DEG6	GB48363	4.29641	3.95483	4.63936	3.92777	4.30093	3.89004	4.236	4.2	4.27104	4.12114	4.03877	4.17062	4.06966	4.06067	2.82187
DEPDC5	GB47808	10.3082	10.2367	10.1227	9.73779	10.4708	9.30811	10.1737	9.69815	10.5937	10.0029	10.0442	9.61447	9.98924	10.1051	10.7765
DHRS4	GB48350	7.08925	7.47207	7.52029	7.3541	7.128	8.17493	7.66887	7.81091	6.92592	7.47508	7.51448	7.2447	7.58086	7.66044	2.82187
DHX35	GB43437	8.71928	8.71488	8.58369	8.16295	8.39028	8.09151	8.54218	8.16284	8.69507	8.46292	8.06136	7.93541	8.14059	8.31641	7.83748
DIP2	GB55237	8.65154	8.70697	8.53477	8.60426	8.79032	9.24391	8.81258	8.51449	8.69015	8.97485	9.20545	9.48335	9.17503	8.63078	8.92661
DLC-A	GB40873	5.03322	5.18915	5.06936	4.61218	4.44295	5.68084	5.15466	4.7816	4.63324	4.50264	4.26697	4.44723	4.13295	5.81971	2.82187
DLC-D	#N/A	11.6302	11.6205	11.3542	11.6922	11.5597	11.7749	11.3703	11.6002	11.277	11.283	11.2352	11.4905	11.1749	11.5255	10.4618
DMAP1	GB45528	7.4303	7.18349	7.36592	6.99884	6.96024	7.04673	7.33034	7.18353	7.11441	7.06749	6.95441	6.87673	7.15578	7.2086	7.69504
DNAH1	GB42359	5.06992	5.25058	5.68738	4.82653	5.56406	4.36766	5.08389	5.14993	5.01503	5.05923	4.69174	4.17062	4.73587	5.02485	6.28431
DNAH2	GB50548	3.65356	3.75456	3.8153	3.47063	4.30093	2.82187	3.50899	3.25178	3.71846	3.48776	3.53808	3.31389	3.55697	3.38939	2.82187
DNAH3	GB49952	8.09828	8.11817	7.60898	7.10962	8.03139	6.13383	7.45	6.70201	8.37171	8.10529	6.77005	7.1121	7.31187	7.26178	9.21438
DNAH5	GB54468	7.80269	7.64766	7.3454	7.17657	7.93903	6.46295	7.4089	7.25712	7.9083	7.80224	7.58755	7.10339	7.48327	6.00783	9.65973
DNAH7	GB45049	4.29641	4.50093	4.20153	4.29179	4.97574	2.82187	4.236	3.6725	4.5878	3.95605	4.41132	4.56399	4.4031	3.38939	5.81283
DNApol-alpha50	#N/A	6.35713	6.62261	6.45891	6.0545	6.40434	6.11689	6.48523	6.63901	6.66922	6.48348	6.1487	5.86105	6.63371	6.72329	6.28431
DNApol-alpha60	#N/A	6.37133	6.52959	6.27481	5.81114	5.97459	6.24705	6.12548	6.30915	6.12566	5.79192	6.11169	5.60956	5.9419	6.45666	2.82187
DNApol-alpha73	#N/A	8.26248	8.41196	8.15386	7.87622	8.16876	8.07423	8.27149	7.68339	8.21616	8.13709	8.00916	7.73047	7.74983	8.04678	7.53695
DNApol-delta	GB42977	8.91973	8.93832	8.59241	8.24826	8.53748	7.88898	8.63707	8.21601	8.85741	8.36563	8.15442	7.95487	8.35147	8.76184	8.56672
DNApol-epsilon	#N/A	8.1442	8.31129	7.9919	7.80758	7.69097	7.30595	7.83832	7.10596	8.12796	7.97498	7.4765	7.1964	7.78301	8.06482	7.35931
DNApol-eta	GB52473	7.45039	7.17586	6.67236	7.34766	7.09979	7.95184	7.88898	7.63824	7.67415	7.63407	7.5331	7.29907	7.4578	8.14614	2.82187
DNApol-iota	#N/A	6.15821	6.36414	5.75218	6.58159	6.13279	6.96451	5.92407	6.11021	5.81396	6.05061	6.53071	6.47813	6.44874	6.12829	5.81283
DNaseII	GB46537	7.20428	7.32815	7.87522	7.45336	7.67833	6.82644	7.47677	7.53363	7.67913	7.48748	7.06747	7.38775	7.07088	7.66044	6.92042
Dab	GB42757	6.15821	6.031	5.06936	5.31418	6.88502	4.59987	5.34694	4.50407	5.97024	5.12694	5.89599	6.47813	5.80123	6.10501	6.92042
Dad	GB50411	7.40305	7.50894	8.06892	7.81226	7.81746	8.22667	8.15216	8.25837	7.86529	8.05623	7.90943	8.13626	8.12451	7.57904	8.19582
Dap160	GB54700	8.70264	8.77154	8.50737	8.79585	9.06724	8.88888	8.7261	8.59224	8.57215	8.69419	9.2213	9.1219	9.17034	8.97071	8.29787
Dat	GB40867	9.35718	9.39534	10.1932	9.57542	9.68767	10.8534	9.97943	10.6265	9.41148	9.54787	10.2667	10.3383	10.4044	9.38606	9.36299
Dbp80	GB54342	8.27754	8.21053	8.17143	8.2448	8.05603	8.50973	7.96652	8.10099	7.96644	8.12524	8.11483	7.79129	8.20624	8.17411	6.63751
Dcp1	GB48009	7.39616	7.30036	7.4738	7.58502	7.33574	7.22985	7.18363	7.53363	7.20702	7.275	7.30829	7.28375	7.20564	6.96086	8.08599
Dcp2	GB49222	7.56542	7.58573	7.55643	7.80758	7.74655	8.23447	7.72574	7.94668	7.36375	7.72585	7.9236	7.62505	8.0617	7.95947	6.63751
Dcr-1	GB44595	9.50041	9.49047	9.15109	9.07408	9.43892	8.84373	9.40619	8.83943	9.82545	9.45951	8.89094	8.62027	9.03586	9.6792	8.72161
Dctn1	GB50038	9.24868	9.31618	9.16285	9.29892	9.37382	9.59518	9.07121	9.31683	9.24879	9.26288	9.45986	9.38464	9.33864	9.33498	9.16124
Dctn2	GB49158	8.49286	8.545	8.36197	8.40508	8.11349	9.01417	8.61016	8.83543	8.24663	8.28987	8.26984	8.32002	8.41631	8.99912	6.63751
Dctn3	GB42698	7.70017	7.77921	7.70062	8.12585	7.96528	8.42709	7.79114	8.24338	7.75179	7.72061	7.74355	7.82869	7.89725	8.23379	5.81283
Dctn4	GB49540	8.13596	8.13791	8.15386	8.24826	8.14599	8.31021	8.12706	8.35076	8.192	8.08505	8.24184	8.01173	8.21841	8.10023	8.08599
Dctn5	GB43223	7.81823	7.59148	8.08755	8.11075	8.14599	6.13383	7.16728	7.03795	7.54922	7.49364	7.38207	7.8181	7.47821	5.60227	10.0876
Dctn6	GB47514	7.04583	7.05626	6.49678	6.67741	6.551	6.87729	6.9833	6.64818	6.68917	6.59125	6.71386	6.24341	6.48973	7.41044	6.63751
Ddc	GB45973	10.6708	10.6087	11.7622	11.1546	10.7451	11.479	10.7111	11.0074	10.7706	10.9788	11.1602	11.447	11.1017	10.9984	10.704
Ddx1	GB44037	8.10674	8.07378	7.77149	8.39887	8.07544	8.16272	7.80704	8.12409	8.0533	8.14883	8.35594	8.21098	8.3292	7.95947	8.08599
Deaf1	GB41654	7.34697	7.08099	7.62608	7.41077	7.30314	7.12449	7.26271	7.34973	7.31977	7.23141	7.15432	7.53736	7.41608	6.78284	8.19582
DebB	GB48423	6.2535	6.50535	6.31783	6.26197	5.93209	6.55349	6.17576	6.60171	5.93698	5.79192	5.75831	5.53225	5.89656	6.9217	5.81283
Def1	GB41428	3.50401	3.29426	3.63819	3.73194	3.33407	2.82187	3.31001	3.7696	2.82187	3.63391	3.23819	3.31389	3.4242	3.38939	6.28431
Det	GB41669	7.40991	7.53897	7.68439	7.42307	7.60002	7.89392	7.91366	7.93925	7.90406	7.78227	7.82132	7.7361	7.86276	8.0162	6.63751
Dfd	GB51299	6.74256	6.9794	7.35569	5.46843	7.19176	5.68084	6.67121	6.69318	7.20011	6.79511	6.6974	6.24341	6.44874	7.14207	8.08599
Dg	GB46696	7.46364	7.02261	7.56532	7.58502	7.85164	6.5906	6.83574	7.18981	7.39435	7.71535	8.11792	8.39315	8.02405	6.05725	9.77033
Dgk	GB40016	5.90717	5.68409	4.63936	5.44391	6.537	5.58453	5.04704	4.88395	5.55199	5.3116	5.99444	6.32101	5.88112	5.21647	6.28431
Dgk-epsilon	GB55916	8.51526	8.53015	7.95179	8.262	8.54446	7.98458	8.35673	8.12736	8.42005	8.19488	8.42479	8.12771	8.5643	8.40402	7.53695
Dh31-R1	GB47217	6.69829	6.56518	7.13432	6.64618	6.78211	6.26251	6.67121	6.64818	6.01869	6.57967	6.39408	6.33603	6.66084	6.45666	7.35931
Dhap-at	GB47571	7.21998	7.0311	6.35959	7.07103	7.26978	7.15774	7.12557	7.03097	6.94261	7.07573	7.42259	6.86647	7.50829	7.69947	5.09416
Dhc64C-like	GB47452	11.1384	11.1044	10.6777	11.0145	11.2255	10.784	10.6669	10.4479	11.2304	10.9656	11.1576	11.1697	11.1954	10.6299	11.5403
Dhfr	GB48252	6.83741	7.09724	6.56963	6.28927	6.537	6.89714	6.65953	6.76236	6.29209	6.23988	6.40428	5.79684	6.31819	6.89498	6.28431
Dhpr	GB50513	8.95528	8.96728	9.25082	9.27032	8.93276	9.44876	8.99236	9.45067	8.42893	9.00961	9.35533	9.31486	9.47799	9.01157	8.48256
Dic	GB45923	10.447	10.3669	10.3885	10.1217	10.3375	9.9155	10.2218	9.865	10.516	10.2029	9.86587	10.0425	10.1043	10.1787	11.3516
Dip-C	GB45391	7.07204	7.08914	7.41596	7.48889	7.06128	8.41342	7.47677	7.58688	6.90052	7.46884	7.9446	8.11046	7.94199	7.23011	5.09416
Dl	GB44031	10.2971	10.2458	9.74288	9.75611	9.65258	10.0996	9.97709	9.65692	9.95201	9.95242	9.99386	9.90429	9.98657	9.80966	10.3943
Dl-2	GB42472	4.64544	4.74469	5.51074	5.07657	5.31862	4.54594	5.15466	5.79759	4.33027	5.09351	4.36521	4.85934	5.31364	4.5271	5.81283
Dlic	GB47599	8.1524	8.19177	7.88235	8.6855	8.29416	8.73252	7.91855	8.40563	7.77522	7.89818	8.64384	8.75396	8.76015	7.97227	7.69504
Dll	GB40095	7.50906	7.30036	7.65136	7.07103	7.70974	6.23142	7.27802	6.93698	7.72316	8.02258	7.41256	7.90572	7.37312	6.94792	9.36299
Dnmt1,1	#N/A	8.72478	8.87391	8.43165	8.36107	8.39028	8.29165	8.36748	7.92053	8.56411	8.39222	8.31084	8.18238	8.45024	8.49551	8.56672
Dnmt1a	GB47348	8.19268	8.10219	7.93131	7.16928	7.7646	6.80558	8.07113	7.30417	8.21958	7.69412	7.1239	6.78156	7.3232	8.24964	6.63751
Dnmt2	GB54141	6.49318	6.36414	6.01152	6.67741	6.35723	6.9264	6.9065	6.81214	6.46441	6.64778	6.92646	6.40886	6.82965	7.33307	5.09416
Dnmt3	GB55485	8.12351	7.90435	8.67682	7.80758	8.19117	6.39456	7.48997	7.19606	8.15321	7.67257	7.68649	7.98358	7.92723	6.81171	10.5051
Dnt	GB50877	6.17454	5.84896	6.88676	6.59256	6.7582	6.48941	6.17576	6.71952	6.649	6.78508	7.03513	6.94662	6.29522	5.34409	8.48256
Dop1	GB50192	7.54688	7.27202	6.70503	6.17675	7.60671	6.63862	7.16728	6.50398	7.51622	6.54436	6.77005	7.35147	6.88432	7.78904	5.81283
Dop3	GB42577	4.15136	3.86033	2.82187	3.83535	4.7889	2.82187	2.82187	2.82187	3.82045	2.82187	3.90178	3.79229	3.92953	2.82187	2.82187
DopEcR	GB54467	5.71831	5.4717	4.30354	5.17069	6.37311	5.00239	5.04704	4.63076	5.77673	4.26337	5.77429	6.05607	5.33686	5.76097	5.09416
DopR2	GB17921	5.49971	5.5937	5.01604	4.56446	6.13279	5.00239	5.48867	4.85074	5.90292	4.91236	5.03451	5.50548	5.40423	5.9566	2.82187
Dp	GB55012	9.14372	9.18959	9.26997	9.2771	9.1969	9.03663	9.11014	8.96528	9.23873	9.12307	9.05111	9.36296	9.17971	8.8302	10.2234
Dpck	GB45443	7.64313	7.70173	7.77149	8.09163	7.6527	8.38217	7.8123	8.18183	7.48812	7.67799	7.92007	7.90071	7.90103	8.22312	5.09416
Dph5	GB45624	8.31452	8.29028	8.18302	8.18835	8.14139	8.13382	8.23672	8.49438	8.37171	8.2685	8.11483	7.90572	8.03442	8.03462	7.83748
Dpit47	GB46495	7.57765	7.75384	7.57416	7.32817	7.50293	7.39921	7.70326	7.39931	7.54377	7.37852	7.17226	6.75952	7.30617	8.23909	6.63751
Drep-1	GB55465	9.90845	9.96364	9.55053	9.95204	9.9843	9.92034	9.87028	9.73181	9.91245	9.69124	10.2057	9.89676	10.2808	10.0549	8.86146
Drep-2	GB41898	9.21974	9.22322	8.98228	7.82157	9.725	9.00963	10.4267	9.44675	9.91456	9.94683	9.613	10.4052	9.35802	10.635	9.96894
Drl2	GB48816	6.29884	5.97882	6.49678	5.84859	6.84019	5.55937	6.30173	6.2007	6.52122	6.06739	6.43447	6.82464	6.36305	5.84818	7.69504
Droj2	GB46569	11.8895	11.9121	11.8993	12.2135	12.0998	12.4959	11.8318	12.2257	11.8023	11.7917	12.0253	12.3526	12.0142	11.9561	11.6696
Drp1	GB47440	8.65154	8.72274	8.39225	8.98786	8.68688	9.03886	8.67796	8.97982	8.77388	8.59754	8.79404	8.7344	8.66998	8.594	9.04869
Dscam	GB44159	10.6579	10.3585	10.4569	9.47728	10.7758	8.42027	10.1757	9.69265	11.1386	10.5125	10.1675	10.6759	10.077	9.63765	12.8952
Dsor1	GB41067	6.54416	6.40407	5.72016	6.62497	6.78211	7.19825	6.27127	6.26197	6.1974	6.06739	7.13614	7.04999	6.90713	7.11919	5.09416
Dsp1	GB47828	8.25489	8.20305	7.91053	8.28573	8.2775	8.38568	8.06673	8.07752	8.24328	8.54815	8.7148	8.65338	8.47835	7.86652	9.6209
Dspp	GB47551	9.1272	9.11193	9.66858	9.57129	9.42008	8.79184	9.12289	9.3812	9.46284	9.70323	9.42917	10.0572	9.58053	8.59813	11.797
Dsx	GB55036	7.13968	7.27202	7.04801	7.0553	7.27819	7.13287	7.52885	7.13879	7.69395	7.76201	7.47168	7.66105	7.48327	7.24074	7.53695
Duox	GB51481	10.5659	10.4994	10.1242	9.94567	9.84572	8.51614	10.1312	8.6157	10.8305	10.2472	9.65817	9.54078	9.99544	9.49645	11.8733
Dyb	GB52195	8.23959	8.24369	7.76378	7.94173	8.39801	7.33529	7.86893	7.78629	7.79369	7.8558	8.38439	8.12771	8.42158	7.97227	8.79323
E(Pc)	GB52797	5.67262	5.4717	5.26354	5.90297	6.20571	5.60924	5.51534	5.14993	5.61698	5.77147	6.5492	6.88693	6.58731	4.73746	6.28431
E(z)	GB42674	8.38226	8.31129	8.35686	8.2517	8.26488	8.60602	8.36032	8.25538	8.36864	8.48161	8.41229	8.08861	8.3977	8.45505	7.96709
E2f2	GB53826	6.79603	7.08099	6.45891	6.92282	6.64537	7.60589	7.10854	7.25712	7.07713	7.14788	7.1239	7.13791	6.86891	7.31306	5.09416
E74	GB49105	10.6201	10.6353	10.2928	10.234	10.2226	10.7368	10.6024	10.775	10.19	10.5095	10.5564	10.8107	10.4515	10.7151	10.4836
E75	GB11364	10.1688	10.0432	9.26179	8.92449	9.16103	9.35176	11.3546	10.1306	10.8734	11.7002	10.3686	10.5829	9.45633	10.7583	11.8483
EDTP	GB46257	8.03321	7.92722	8.09983	7.84002	8.18672	7.65904	7.74787	7.75703	8.07233	7.89353	7.72748	7.9693	7.61352	7.2086	8.98894
EF1a-F2	GB41358	12.8274	12.7042	13.3254	12.9796	12.8159	13.0648	12.8048	12.9425	12.4893	12.9882	12.9891	13.5221	13.1716	12.1564	12.9935
EIF2AK4	GB49932	9.82381	9.81107	9.61612	9.23245	9.66544	9.03886	9.86523	9.19598	10.0834	9.59726	9.26784	8.91406	9.32323	9.76808	9.87305
ERp60	GB47462	11.1203	11.1929	11.4376	11.1314	11.0473	11.879	11.1643	11.4064	10.8885	11.2251	11.1989	11.2913	11.2838	11.3043	10.3236
Eaat-2	GB49785	10.1515	9.96916	9.25357	9.38773	10.3214	9.27448	9.91127	9.30677	10.0483	9.39032	9.26506	9.39	9.41991	10.0028	9.7344
Eaat-3	GB46763	10.2454	10.1798	9.93502	10.0777	9.97529	9.90578	10.2159	9.84331	10.0163	10.2716	10.2583	9.98453	10.2261	9.62757	9.80539
Eaat-4	GB53002	8.93405	8.77659	7.90354	6.80537	9.31994	7.15774	8.4406	7.43144	9.23873	8.31093	8.49999	8.9629	8.61811	8.79102	8.56672
Eaat-5	GB53613	4.78824	4.98578	5.51074	5.10869	4.88571	5.3979	5.61712	5.3016	4.7603	4.70152	4.88993	4.98468	4.4031	4.91746	2.82187
Echs1	GB40460	9.86176	9.97575	10.3311	10.3226	9.95449	10.9025	10.1343	10.7834	9.98952	10.2903	10.4847	10.2187	10.4444	10.3539	10.0588
Ecr	GB48059	10.7451	10.8084	11.1383	10.6952	11.1021	11.2607	12.2038	11.8552	11.1703	12.2838	11.8223	12.2372	11.3534	12.1903	11.6696
Ect4	GB51500	10.8745	10.8502	11.3014	11.1467	11.0722	11.5826	11.0693	10.9719	10.8724	11.0431	11.2191	11.2015	11.4514	10.8206	11.9998
Edem1	#N/A	6.54416	6.49308	6.31783	6.71802	6.37311	7.48678	6.84607	6.77078	6.36851	6.70216	7.1239	7.20456	6.98778	6.98638	6.28431
Edem2	GB53949	8.64865	8.80648	8.67682	8.83083	8.7456	9.64281	8.90404	9.1094	8.79922	9.09503	9.25389	8.9653	9.27453	9.09582	8.29787
Ef-1a-f1	GB52028	12.0039	11.6558	12.4276	12.5214	12.6128	10.461	11.4755	11.1079	12.4838	12.6558	12.0469	12.8437	11.6156	9.95851	14.7111
Ef1beta	GB47103	10.1226	10.1539	10.5279	10.6411	10.1581	10.9983	10.1489	10.6958	9.8976	10.2689	10.3556	10.3337	10.3964	10.1606	10.6853
Eg	GB51231	6.84757	6.56518	7.945	7.92022	8.02141	6.39456	7.48997	7.20848	7.77522	8.2395	7.7153	8.26263	7.50332	6.81171	9.65973
Eh	GB49646	7.03699	6.84137	6.38001	6.51394	6.52285	6.15057	6.12548	6.02775	6.63878	6.98232	6.68909	6.69129	6.96623	5.34409	6.28431
Eif3h	GB46247	9.0893	9.20837	9.2453	9.28553	9.10785	9.74046	8.9784	9.57672	8.98937	9.05191	9.24828	9.31486	9.18901	8.83371	9.04869
Eif4g	GB13213	11.87	11.8881	12.1342	12.1741	12.2128	12.2623	12.1814	12.074	12.1193	12.2145	12.4498	12.3514	12.4944	12.1434	12.618
Elf	GB44941	9.71051	9.72892	10.0003	10.066	9.84995	9.83192	9.87782	9.88347	9.8074	10.0527	10.0089	10.1381	9.95238	9.5465	10.9113
EloA	GB45924	6.65262	6.51752	6.75267	6.82408	6.72157	7.14121	6.95498	7.06555	6.1548	6.73382	7.09282	7.30668	6.86115	7.02384	5.09416
Elongin-B	GB53171	8.53106	8.46604	8.36706	8.97332	8.51278	9.35891	8.48736	8.93949	8.2666	8.59754	8.83583	8.83754	8.81327	8.53053	7.15657
Elongin-C	GB52994	8.86596	8.85972	8.57492	9.04061	8.70879	9.15225	8.95958	9.44675	9.00727	8.59468	8.66297	8.60496	8.51087	9.40742	7.96709
Emc	#N/A	9.60854	9.3504	10.1197	9.74515	9.85977	9.25928	10.3833	9.95785	9.88367	10.803	10.2833	10.7529	9.86994	9.37888	11.9692
En	GB55322	5.44603	5.33777	5.47252	4.86535	4.7889	3.50654	4.84536	4.45867	4.54059	5.12694	4.45565	4.90249	4.66082	3.93632	6.63751
Ent1	GB44124	8.82298	8.7791	8.56166	8.48632	8.57886	8.70754	8.84114	8.49691	8.60126	8.52431	8.51176	8.32002	8.51335	8.87517	6.63751
Ent2	GB43265	10.5644	10.6165	10.4425	10.3095	10.5212	10.1653	10.5624	10.1873	10.5291	10.4032	10.3037	9.96308	10.391	10.7094	9.26564
Ent3	GB53336	6.14169	5.92463	4.84156	5.44391	6.57861	4.70109	5.61712	5.14993	5.75774	4.60614	5.93903	6.56979	5.02756	5.53332	2.82187
EphR	GB41629	10.254	10.1808	10.196	9.51074	10.1364	10.6204	11.3636	10.811	10.7406	11.4728	11.0115	11.3286	10.6973	11.3306	11.3983
Eps-15	GB44307	8.94588	9.09387	9.16869	9.30058	9.22323	9.66172	9.25421	9.17561	8.95903	9.05191	9.52401	9.56945	9.73248	9.34731	8.56672
Ercc1	GB41199	7.52178	7.65316	7.50188	7.47123	7.46661	7.85396	7.59141	7.76125	7.38219	7.55383	7.38207	7.28375	7.77066	7.83182	5.09416
Ero1L	GB55544	7.51543	7.70702	7.41596	7.32817	7.53836	8.56023	7.66887	7.68782	7.58148	7.85101	8.07412	7.86	8.07515	8.07078	6.63751
Err	GB44544	7.92255	8.06143	8.59241	7.94173	8.21324	7.7652	8.30917	8.17236	7.83886	8.22847	7.7153	8.66819	7.84323	7.97227	8.64625
Est-6	GB53756	4.29641	4.32651	4.56389	4.01182	3.70007	3.98699	2.82187	4.36219	3.71846	4.19463	3.64614	4.17062	2.82187	3.61945	2.82187
Esyt2	GB44615	9.73116	9.7106	9.59675	9.71176	9.67183	9.84852	9.76173	9.67824	9.5644	9.60438	9.80118	9.64472	9.94416	9.81144	9.58099
Etfdh	GB46322	8.72753	8.79906	8.78345	9.04459	8.59239	9.25928	8.77269	8.98703	8.57748	8.8268	8.91949	8.92149	8.91397	8.65082	8.29787
Eth	GB40094	6.77488	6.58843	7.06066	6.87878	6.7461	5.53374	6.91632	6.35481	6.85716	7.05085	5.67551	5.6344	5.83374	5.42295	9.10606
Ethr	GB46500	6.10805	5.96099	4.63936	4.97523	5.10012	5.33953	5.88413	4.70846	6.30512	6.62544	5.69247	5.23759	5.60751	5.93027	5.09416
Ets97D-like	GB41865	5.86735	5.90609	5.26354	5.79202	5.35183	5.58453	5.31674	5.65736	5.90292	5.75073	5.65834	5.4219	5.83374	5.69964	5.09416
Exn	GB43216	10.5427	10.5679	9.97556	9.55185	9.61827	9.56613	10.1079	9.27176	10.4851	10.2298	9.70709	9.5726	9.71327	9.71198	11.0493
Exp6	GB55700	8.68015	8.69637	8.37719	8.20623	8.41334	8.40653	8.35673	7.98683	8.63748	8.24681	8.1484	8.40734	8.17847	8.45505	8.56672
Ext2	GB44516	9.37304	9.41972	9.29688	9.00837	9.15192	8.62986	9.28855	8.9506	9.42634	8.88879	8.66297	8.29352	8.84108	9.36924	8.64625
Eyg	GB55405	5.14039	4.94861	5.12062	5.39349	4.83822	3.65661	4.236	3.85651	5.50689	5.25282	5.06161	5.5585	5.26596	3.79276	7.69504
FAR1	GB49380	12.1807	12.2341	9.60324	11.2394	10.5716	12.0669	12.4567	9.38802	12.6315	12.3946	11.67	11.9993	10.9471	12.1384	10.5051
FATP	GB47608	9.01937	9.13371	8.71324	9.17008	8.91671	9.35713	8.85903	8.83343	8.99934	8.97705	9.24828	9.52948	9.34836	8.89546	7.96709
FBN2	GB52213	6.62922	6.32307	6.16116	6.03844	5.86584	6.83675	6.47192	6.0968	6.27895	6.38033	6.27668	5.94234	6.41721	6.41953	6.28431
FIG4	GB53011	10.0167	10.0189	9.78911	9.49047	9.50122	9.06314	9.76986	9.34657	9.94067	9.55377	9.204	8.71457	9.28614	9.62757	9.58099
FK506-bp1	GB48924	8.12767	8.24733	8.46527	8.02469	8.17327	8.86146	8.98307	8.94506	8.78546	8.95716	8.64384	7.83396	8.62955	9.50087	7.83748
FK506-bp2	GB45562	11.1821	11.1527	11.069	11.0944	11.0405	11.3077	11.0036	11.1334	10.9546	10.9744	10.7291	10.8013	10.8127	10.7965	9.80539
FKBP59	GB40746	9.89387	9.98558	10.1377	10.3389	10.0235	10.9595	10.0545	10.5891	9.82881	10.0338	10.2632	10.4078	10.2945	10.3612	9.21438
FR	GB51916	6.80649	6.67781	6.65575	6.57054	6.81724	6.78441	6.5997	6.71952	6.59714	6.11655	6.73821	7.09462	6.7645	6.61271	6.63751
Faa	GB40119	6.62922	6.4429	7.52941	6.98229	7.05149	7.17408	6.48523	7.31569	6.30512	6.91035	7.35091	7.56929	7.38938	6.10501	7.96709
Fabp	GB49757	10.7472	10.7754	10.5142	10.5909	10.4863	11.5611	10.8499	10.7745	10.6435	10.711	10.5856	10.3883	10.3768	10.7331	9.7344
Faf	GB46736	7.15611	7.25039	7.26027	7.63871	7.31953	8.26143	7.33034	7.45246	7.30051	7.16343	7.89511	8.07534	7.81544	7.27218	6.63751
Fas1	#N/A	4.9566	4.91033	4.30354	4.65811	5.74794	3.89004	4.236	4.07647	4.49145	4.60614	4.88993	5.45033	4.5809	4.17125	5.81283
Fas3	#N/A	10.0334	10.0783	10.3632	10.2684	10.2259	10.4527	11.0025	10.7978	10.0956	10.9246	10.7956	11.2137	10.5232	11.0995	11.1206
Fbxl4	GB51964	8.82042	8.88095	9.10919	8.94167	8.87303	9.13569	8.91629	9.26436	8.77621	8.95938	9.30888	8.77052	9.23016	9.0513	8.19582
Fdh	GB53086	8.51526	8.61987	8.70924	8.69313	8.54097	8.62986	8.28668	8.49184	8.3991	8.55992	8.67348	8.74561	8.81327	8.14614	8.86146
Fdxh	GB43478	7.31077	7.30036	7.30347	7.36689	6.99131	7.72145	7.20782	7.44723	7.12175	7.10019	6.86887	7.04999	6.78107	7.67618	5.09416
Fem	GB47020	10.531	10.6312	9.92125	10.1027	10.3102	9.96084	10.0026	10.4156	10.7625	10.3295	10.3091	9.70769	10.3009	10.5786	9.45418
Fem-1	GB52576	7.40305	7.59148	7.40609	7.74043	7.37548	7.80241	7.46345	7.79454	7.26782	7.40491	7.88065	7.74172	8.0171	8.02237	5.81283
Fer1HCH	GB43731	13.5753	13.6069	14.0442	13.7145	13.5259	14.8016	13.7345	14.3065	13.4539	13.7818	13.9282	13.8042	13.8742	13.6758	11.9614
Fer2LCH	GB43708	12.8926	12.9734	13.3466	13.0886	12.871	14.1441	13.1336	13.5709	12.9456	13.1929	13.2173	13.1921	13.2544	13.1968	12.2236
Fer3HCH	#N/A	6.87763	6.9706	6.56963	6.63562	6.90692	6.69647	7.00187	6.83639	6.62848	5.87082	6.29876	6.17812	6.32954	7.61216	6.28431
Fib	GB52500	7.95102	8.03641	8.57931	8.23787	7.95484	8.24222	8.12283	8.43495	7.98664	8.00545	8.01579	7.87029	8.28068	7.78179	7.53695
Fibp	GB55512	9.89387	9.77247	10.0182	9.95204	9.8301	8.81282	9.78598	9.68712	10.057	9.88266	9.52865	9.13048	9.57226	9.61131	9.87305
Fibroin1	GB53621	4.22632	4.04072	4.63936	4.35173	4.22255	3.78146	3.31001	3.6725	4.33027	5.90866	3.82486	4.38418	3.85079	3.38939	7.15657
Fibroin2	GB53622	3.88621	3.48702	2.82187	3.61319	3.54253	3.65661	2.82187	3.42764	3.27554	3.75558	3.90178	4.38418	3.55697	3.79276	2.82187
Fibroin3	GB53623	3.65356	3.29426	3.96189	3.28253	3.33407	3.30825	2.82187	3.25178	3.46087	3.48776	3.40863	3.79229	3.4242	2.82187	2.82187
Fibroin4	GB53624	2.82187	2.82187	4.20153	3.61319	3.54253	3.30825	3.31001	2.82187	3.27554	3.29479	3.40863	3.5144	3.55697	2.82187	5.81283
Fim	GB52427	8.90526	8.86209	9.3022	9.10299	9.22323	9.1105	9.81245	9.52192	9.41745	10.062	9.55163	10.0345	9.35527	9.45148	11.3752
Flo1	GB48177	8.88574	8.94729	8.43651	8.83773	8.87303	8.77857	8.73996	8.80106	8.65777	8.45978	8.67558	8.64443	8.88944	9.18918	8.19582
Flo2	GB51863	6.5061	6.50535	6.58727	6.97395	7.31136	7.2454	6.9065	6.65729	7.02326	7.11626	7.14223	7.16327	7.20564	6.54545	7.15657
Fmr1	GB50259	8.36474	8.37918	8.49812	8.45377	8.49488	8.43388	8.40972	8.22214	8.33121	8.35891	8.4148	8.83492	8.19704	8.23379	9.65973
For	GB49908	10.991	10.8657	10.9341	10.7983	10.8802	10.4384	10.8895	10.4196	11.286	11.1226	10.9169	10.9291	10.8774	9.93583	12.9234
Foxp	GB40150	9.31767	9.13371	9.57052	8.64414	9.07449	8.81282	9.65316	9.17719	9.39345	9.5944	8.76483	9.6327	8.89325	9.50968	10.0876
Fru	#N/A	8.51208	8.60009	8.85402	7.81226	8.80492	7.9892	8.8867	8.85133	8.39306	9.15641	8.963	9.37022	8.51828	9.11325	8.29787
Fsn	GB42568	5.17427	5.15735	4.84156	5.49253	5.64587	5.33953	5.25423	5.03831	4.5878	4.74659	5.56915	5.39287	5.58848	4.80033	5.81283
Fstl5	GB40671	8.47989	8.57426	7.71667	7.95448	8.77853	8.18703	8.37461	8.05366	8.4981	7.75177	8.10554	8.62331	8.03442	8.67058	8.79323
FucT6	GB51000	8.37178	8.51816	8.27798	8.55489	8.36685	9.35891	8.71492	8.6615	8.36247	8.60039	8.45193	8.85835	8.58794	8.78378	6.92042
Fuca	GB49621	9.73798	9.91189	9.75458	9.72049	9.66704	10.4602	9.86143	10.0066	9.87286	9.97568	9.79734	9.91177	9.91456	10.2592	7.69504
Fucta	GB42984	11.0442	10.9848	9.22021	8.32226	11.4801	10.4849	10.6272	10.0295	11.3123	9.34341	10.4625	11.0092	10.4483	11.737	8.48256
Fur1	GB48481	7.53438	7.67495	7.48322	7.08659	7.33574	7.07312	6.93578	7.07236	7.29403	7.21658	7.29197	7.3588	7.19334	7.29276	8.92661
GABA-B-R1	GB49131	7.97894	7.89973	6.78357	7.03137	8.29416	6.91671	7.38083	6.99555	7.92096	7.10019	7.54691	7.63715	7.52801	7.5192	7.69504
GABA-B-R2	GB49239	7.31808	7.25039	6.84344	6.07037	7.58655	6.85717	7.27038	6.71079	7.26119	6.77497	6.80887	7.1121	6.96623	7.5622	7.69504
GABA-B-R3	GB53009	7.22777	6.95284	5.8734	5.41893	7.88504	5.79253	6.79368	5.87858	7.24784	6.53239	7.09909	7.03174	6.54908	7.2513	7.83748
GABP-2	GB47627	7.66621	7.66953	7.60898	7.78396	7.67833	8.19105	7.74787	7.84309	7.27441	7.52405	8.02239	7.69618	8.22446	7.90709	7.69504
GABPI	GB53020	6.23805	6.031	5.8141	6.07037	6.30849	6.01074	6.03748	6.33216	6.25228	6.22504	6.30967	6.00035	6.14896	5.84818	2.82187
GARNL3	GB45413	9.67968	9.6125	9.54605	9.20428	9.77184	8.81542	9.68359	9.5132	10.1539	9.71644	9.58765	9.61752	9.68943	9.40742	11.2535
GC	GB40614	7.42353	7.60289	6.88676	6.24812	8.06576	5.93526	7.15903	6.50398	7.72797	6.91035	6.94747	7.05903	7.05736	7.5192	7.15657
GMCOX1	GB51812	8.88328	8.63105	8.14203	8.0447	8.28586	8.18301	8.87168	6.54388	9.9975	9.96686	8.3189	8.23902	7.81544	7.3528	11.1618
GMCOX10	GB51821	4.59393	4.91033	4.90237	4.86535	5.17698	4.30153	4.65744	4.50407	5.61698	5.87082	4.94971	5.09902	4.80667	4.44797	2.82187
GMCOX12	GB43007	5.92666	5.84896	8.57051	7.89398	7.74048	4.36766	4.65744	7.95037	4.38654	4.19463	5.4934	6.89705	7.02299	4.44797	8.39317
GMCOX13	GB43006	5.03322	4.91033	4.7777	4.56446	4.97574	5.21468	4.92983	4.31072	4.71937	4.91236	4.65544	4.76843	4.73587	4.60131	2.82187
GMCOX14	GB43005	8.35413	8.1535	10.1242	9.26692	8.7726	6.77371	7.58527	9.1677	7.55465	8.11729	7.73151	8.47963	8.63182	7.24074	9.45418
GMCOX15	GB50023	7.12307	7.25039	7.65969	7.04737	7.00152	7.27599	7.31558	6.86024	7.10703	7.68339	6.6121	6.96598	6.82965	7.14207	6.28431
GMCOX18	GB53768	7.54688	7.36885	8.39723	8.26541	8.3629	7.4604	7.96652	8.18497	7.30696	7.98812	7.91653	8.44909	8.24245	7.2513	7.35931
GMCOX2	GB51813	4.9566	4.8302	3.40289	3.61319	3.54253	3.50654	3.89378	3.25178	5.412	4.95065	3.53808	3.79229	2.82187	5.26036	5.09416
GMCOX3	GB51814	4.74243	4.98578	5.06936	4.74514	5.01852	4.07505	5.28584	4.94791	5.46027	4.7901	4.76132	4.94423	4.2491	4.5271	5.09416
GMCOX4	GB51815	3.77799	3.75456	4.08877	3.61319	4.22255	3.98699	3.89378	3.6725	4.94723	4.60614	4.31717	3.79229	4.19261	4.44797	5.09416
GMCOX5	GB51816	4.48382	4.26187	4.20153	3.73194	3.70007	3.78146	3.89378	2.82187	4.63324	4.12114	3.82486	3.79229	3.92953	3.93632	5.81283
GMCOX6	GB51817	8.05085	7.80413	8.74487	5.98916	7.6266	7.14121	7.6036	6.56342	8.91966	8.63141	7.58309	8.41086	7.13663	7.71479	8.56672
GMCOX7	GB51818	5.36136	5.15735	3.96189	5.10869	5.01852	4.88182	5.54149	3.85651	6.83944	6.38033	5.37132	5.27011	4.69891	4.73746	6.92042
GMCOX9	GB51820	4.69488	4.11976	4.48338	4.46291	4.88571	3.78146	4.75491	3.93565	4.07096	4.26337	4.36521	4.44723	4.45012	3.93632	5.09416
GPS1	GB53426	9.11677	9.23609	9.18319	9.23071	9.11958	8.96348	8.86157	9.10278	8.96718	9.03935	9.01353	8.85835	9.04101	8.75074	9.4977
GRIK2	GB49273	8.03764	7.92722	7.49258	7.0152	8.23066	7.30595	7.98526	7.0449	7.91253	8.07277	7.855	7.88558	7.87819	8.23909	8.92661
GST-mic1	GB55590	8.86097	8.98699	9.28079	9.28048	8.73038	9.57537	8.97137	9.32396	8.55872	8.89345	8.87645	8.49299	8.68979	9.07225	7.35931
Gad1	GB50011	10.2027	10.0732	10.4806	9.80735	9.9958	9.33917	10.2704	9.65125	10.135	10.005	9.97529	10.1893	10.0007	8.95468	12.2808
GalNAc-T2	GB53199	8.00633	7.86699	7.65969	7.93746	7.99107	7.94235	7.98991	7.43672	7.78448	8.20241	8.01909	8.0024	8.23048	7.85965	6.92042
Gapdh	GB50902	12.6568	12.6046	12.9254	13.2283	12.9127	12.7895	12.4548	13.2161	12.2052	12.3256	12.7091	12.8064	12.6712	12.7557	12.6081
Gas41	GB43154	6.93592	7.27202	6.9288	7.28839	6.85153	7.68775	7.26271	7.50875	7.36375	7.20159	7.26993	6.9071	7.25974	7.50163	7.15657
Gat-1B	GB51198	8.90768	8.80154	8.72122	8.13335	9.27029	7.07312	8.66058	8.13387	8.89208	8.16048	7.87337	7.67872	8.19088	8.61046	8.39317
Gat-a	GB54918	9.42804	9.38712	8.32583	8.5465	9.51727	9.03663	9.35128	8.95612	9.35202	8.77218	8.66508	8.86864	8.89514	9.79173	7.35931
Gb15078	GB41756	5.78414	5.57015	5.39273	5.31418	5.69784	4.92327	5.00912	5.50134	5.412	4.83217	4.72702	4.67043	5.11187	5.73064	5.81283
Gbeta5	GB41079	7.70017	7.81398	7.75604	7.4653	7.74655	7.20621	7.4089	7.55322	7.54922	7.46258	7.41758	7.29907	7.45265	7.41044	6.63751
GckIII	GB50672	8.86097	8.45978	9.55723	8.82159	9.30769	5.7039	8.07113	7.70544	8.69015	9.34	8.64811	9.46312	8.25728	6.70801	11.0047
Gclm	GB40955	8.46023	8.49692	8.417	8.44477	8.38251	9.27259	8.77269	8.78459	8.40811	8.59182	8.72292	8.33865	8.90459	8.63078	7.96709
Gdch	GB45193	6.03827	5.7058	6.95616	6.02221	6.49414	5.11278	5.48867	5.6388	5.65868	6.31184	6.3205	6.70289	6.89197	4.06067	8.39317
Gdh	GB41651	10.6822	10.7182	11.0791	11.0624	10.8218	11.2825	11.0128	11.3037	10.6892	10.3925	10.6705	11.3018	10.774	11.0155	9.96894
Gdi	GB55434	10.2252	10.3219	10.2229	10.4185	10.3869	10.8356	10.2483	10.5087	10.0674	10.1802	10.3239	10.6237	10.1956	10.3155	9.21438
Ge-1	GB40017	8.21241	7.95419	7.76378	7.90278	7.68466	7.83869	8.00377	7.6655	7.91675	7.90281	7.89511	7.90572	8.12451	7.69947	8.29787
Gem3	GB42458	6.55663	6.74136	6.16116	6.60345	6.65836	7.20621	6.8766	6.92196	7.00749	6.80508	6.81651	6.53123	6.86115	7.48385	5.09416
Gfat2	GB49534	10.3246	10.295	10.4617	10.2633	10.3898	10.5851	10.5027	10.6015	10.5665	10.6063	10.5834	10.4598	10.357	10.5111	10.7765
Gfr	GB54655	8.71928	8.66408	9.08468	8.76242	8.81072	8.36452	8.80995	8.88647	8.82861	8.57741	8.55336	7.93541	8.71577	8.81607	6.92042
Gga	GB45638	9.04819	9.13371	8.97229	8.90274	8.95388	9.1848	9.28099	9.11105	9.23028	9.01603	8.98849	8.7344	9.0948	9.53145	8.72161
Ggamma1	#N/A	7.87382	7.97629	8.29944	8.19911	8.21762	9.82032	8.34226	8.84737	7.71833	8.22108	8.29185	8.54205	8.24245	8.61455	2.82187
Gint3	GB53245	9.07645	8.98916	9.05345	9.16644	9.0769	10.2232	9.22297	9.57433	8.75752	9.04564	9.35403	9.37925	9.34559	9.64566	7.15657
GlcAT-I	GB46378	10.3797	10.4371	10.5571	10.5773	10.3275	10.6382	10.4395	10.5501	10.5229	10.4819	10.4094	10.272	10.2283	9.90614	10.7224
GlcAT-P	GB45220	8.08977	8.07378	7.86085	8.00848	8.13215	8.04792	8.16043	7.97599	8.13883	7.98375	8.32158	8.2897	8.3292	8.07672	8.39317
GlcT-1	#N/A	3.77799	2.82187	3.40289	3.73194	3.94466	3.30825	3.50899	3.25178	3.27554	3.29479	3.40863	4.24651	3.66773	2.82187	5.09416
Gld	GB40839	4.42467	4.55375	4.63936	4.35173	4.83822	4.92327	4.75491	4.67022	4.98157	4.5555	4.65544	4.08885	5.05627	4.73746	5.81283
Gld2	GB44548	10.2785	10.263	10.2888	10.1653	10.1456	10.2723	10.1552	10.162	10.1404	10.0866	10.0579	9.7556	10.1669	10.2526	9.80539
Gli	GB45272	8.49286	8.29732	8.21161	7.95448	8.19117	7.58162	8.45075	7.8939	8.57748	8.35891	7.84758	7.69038	7.93832	8.05282	8.08599
GlnS	GB45377	10.9516	10.9473	10.9994	10.9508	10.9528	12.0416	11.3306	11.539	10.7094	10.7391	10.8114	11.1764	11.1066	11.3583	8.56672
Glob1	GB47694	8.68863	8.37586	8.77198	8.76	8.53046	7.29105	8.62816	8.28788	9.30133	9.28964	8.48335	8.81377	8.56668	7.07231	10.4397
GluCl	GB43543	10.1205	10.0285	9.96386	8.56046	10.3762	10.5116	11.5962	11.0237	10.5692	11.0696	10.683	11.4615	10.2056	12.1069	9.69755
Glurb	GB53857	6.69829	6.8022	5.90213	5.60707	6.86278	5.7039	6.5997	5.78082	6.60766	6.54436	6.33125	6.45083	6.32954	7.11919	7.35931
Glut1	GB40980	8.76807	8.44084	8.73309	8.80291	9.11958	7.55694	8.47416	7.74856	8.91545	8.84134	8.84888	9.49003	8.42158	8.15178	9.45418
GlyP	GB42835	9.11048	9.18391	10.0691	10.1413	9.72347	10.1187	9.16663	10.7117	8.79236	9.13885	10.073	9.86114	10.1279	9.88092	8.39317
Gmap	GB45905	11.419	11.4353	11.6031	10.9444	11.1736	10.0563	11.4726	10.788	11.8508	11.621	10.9523	10.5376	10.9549	11.2769	12.8498
Gmer	GB52080	7.84881	7.98067	7.91749	7.83543	7.69726	7.78126	7.8123	7.93179	7.70376	7.97057	7.54691	7.84443	7.69859	7.93352	6.28431
Gnf1	GB41305	8.54978	8.5858	8.45096	8.53805	8.57545	8.85388	8.89663	8.73404	8.49529	8.62862	8.50707	8.36797	8.53297	8.80896	7.53695
Golgin84	GB43483	8.6253	8.65041	8.57931	8.17752	8.35498	8.64457	8.82042	8.5946	8.89636	8.50006	8.38695	7.8805	8.35423	9.08408	8.08599
Gos28	GB41134	7.16425	7.28626	7.18141	7.26124	7.19176	7.51269	7.43643	7.20228	7.0154	7.20159	7.09909	6.87673	7.03684	7.08417	8.08599
Got2	GB46120	9.29565	9.24521	9.5143	9.58228	9.39521	10.1187	9.32578	9.85419	8.91966	9.26288	9.84556	9.67141	9.94691	9.37165	9.16124
Gp150	GB50897	11.7128	11.689	12.1135	11.9909	11.8009	11.9258	12.0659	11.8772	11.5758	11.669	11.5327	11.53	11.8203	11.8881	12.3477
Gpdh	GB41388	8.59857	8.68032	8.62677	8.73066	8.58564	9.74046	8.9236	9.33813	8.51489	8.37566	8.79404	9.08045	8.86643	9.34485	6.63751
Gprk1	GB51749	8.82042	8.74091	8.74877	8.45377	9.05018	7.82842	8.9405	8.47141	9.03662	8.95493	8.77463	9.13261	8.68102	8.5175	10.0295
Gprk2	GB49466	5.17427	5.4717	5.35102	5.17069	5.35183	5.97351	5.80068	5.45941	5.79547	5.90866	6.04776	6.05607	5.97133	5.69964	5.81283
Gr1	GB44499	3.30644	4.04072	4.20153	4.35173	3.70007	3.89004	3.99103	3.7696	3.46087	3.86146	4.26697	4.56399	4.30282	3.61945	2.82187
Gr10	GB44014	5.36136	5.22022	5.35102	5.2586	6.07552	4.15604	5.18868	4.70846	5.73848	5.5486	5.06161	5.4219	5.35969	4.44797	7.35931
Gr2	GB41360	4.69488	4.94861	5.30798	4.70239	5.28458	4.36766	4.55158	4.7816	5.57399	5.3116	4.31717	4.56399	4.73587	5.30287	6.28431
Gr3	GB40382	4.15136	4.38763	3.8153	4.08921	3.94466	3.89004	4.07936	3.93565	3.60138	3.95605	3.64614	3.79229	3.66773	3.79276	2.82187
Gr7	GB53324	3.50401	4.11976	4.30354	3.47063	3.70007	3.50654	3.31001	3.56114	3.91163	3.75558	3.64614	3.79229	4.00212	2.82187	2.82187
Grd	GB40809	7.68894	7.80907	7.46432	7.50054	7.6266	7.03782	7.48997	7.24512	7.68903	7.73628	7.592	7.31424	7.47313	7.16459	8.29787
Grip	GB41863	9.28452	9.04037	9.46294	9.4064	9.4408	7.36405	8.61618	8.37296	9.43077	9.08894	8.99521	9.42529	8.79916	7.30295	10.7587
Grip75	GB52314	9.86051	9.87593	10.0877	9.59996	9.90385	9.24584	9.90759	9.73717	10.1131	9.67103	9.47557	8.75396	9.53383	10.3205	7.53695
Grip84	GB46012	6.46699	6.67781	6.38001	6.63562	6.84019	6.93602	6.71697	6.45248	6.68917	6.41989	6.63822	6.74837	6.48973	7.17572	2.82187
Grp	GB50198	8.99908	8.69637	7.88235	6.73789	7.00152	4.92327	8.04456	5.83055	11.1844	11.2799	7.14828	7.43706	6.32954	5.12411	9.21438
Grx-like1	GB52955	8.38921	8.00666	9.29421	8.67013	8.83654	6.60276	8.5037	7.40471	8.62722	9.47047	8.98173	9.45119	8.76431	6.85395	11.5914
Grx1	GB41663	7.3326	7.515	7.15806	7.13228	6.68398	7.30595	7.0562	7.20848	6.9835	6.64778	6.62957	5.90228	6.90713	7.69947	7.15657
Grx2	GB45288	8.11515	8.1993	7.97199	8.40508	8.08025	7.85396	7.52885	7.86284	7.96644	7.64518	7.592	7.03174	7.51325	7.81059	7.83748
GstD1	GB50265	8.40986	8.28675	9.40968	8.44477	8.78148	9.18278	8.43379	9.27176	8.07611	8.3248	8.7148	9.31486	8.99046	7.97863	11.2149
GstO1	GB44803	7.50906	7.35541	7.83903	7.92022	7.67196	8.07423	7.50305	8.03637	7.29403	7.67257	7.84386	7.62505	7.74142	7.5622	6.63751
GstO2	GB51243	9.04819	9.05704	8.96895	9.15911	9.06482	9.68324	9.4183	9.28645	9.12491	9.02456	9.18501	9.05814	9.19518	9.75888	7.35931
GstS1	GB48905	7.58978	7.86699	9.49351	8.35147	8.0164	8.46735	8.40276	9.98692	7.81193	8.39222	7.79843	7.53736	7.86663	8.02851	8.39317
GstS4	GB49545	8.36826	8.34224	7.46432	7.75022	7.36762	7.65323	8.29797	7.42081	8.53148	8.68616	8.09619	8.01636	7.62729	7.40099	9.77033
GstT1	GB42961	8.60753	8.65315	8.68499	8.57979	8.44726	9.46872	8.75914	9.18191	8.48396	8.497	8.65874	8.37159	8.61351	8.93521	7.15657
GstU1	GB49614	7.85887	7.68572	8.72914	8.74296	8.2564	9.99565	8.35673	9.213	8.83085	8.73371	9.49348	9.72761	9.18901	8.83721	7.35931
GstZ1	GB48672	6.37133	6.49308	7.45478	6.99884	6.7582	8.17087	7.27802	7.66999	6.58654	7.50588	7.62708	7.67286	7.88966	7.19772	6.28431
Gtp-bp	GB53389	9.05695	8.94729	8.94192	9.18458	8.99267	9.59366	9.05578	9.15174	8.79465	9.12307	9.21699	9.31298	9.05634	8.9055	8.48256
Gtpx1	GB47478	9.9861	10.1655	10.4794	10.56	10.275	10.9583	10.3868	10.8654	10.3668	10.3113	10.3484	10.2672	10.3166	10.7702	9.65973
Gtpx2	GB48634	10.3858	10.445	10.7171	10.6901	10.4653	11.2132	10.3842	10.5784	10.1368	10.453	10.4528	10.447	10.5009	10.3697	8.29787
Gycbeta1	GB52953	7.72786	7.71756	7.51111	7.59048	8.18672	7.10757	7.8588	7.28671	7.74706	7.21658	7.43749	8.08861	7.14304	7.82478	7.96709
H	GB47799	8.57438	8.34902	8.55722	8.70575	8.53748	8.52887	8.49065	8.51199	8.59338	8.35891	8.45924	8.55166	8.55713	8.32641	8.92661
HDAC1	GB53438	6.03827	6.20735	6.03759	6.69786	6.70915	7.22202	6.40347	6.54388	6.09592	6.50814	6.97502	6.79245	7.05055	6.40059	5.09416
HDAC4	GB43234	10.8789	10.6179	11.1354	10.6593	11.2482	8.56023	10.4017	9.49181	11.5861	11.1251	10.5682	10.7674	10.4347	9.04526	13.5611
HDAC6	GB42847	11.1916	11.2218	11.0565	10.685	11.003	10.7821	10.5794	10.8693	11.1892	10.3777	10.682	10.1779	10.7965	10.898	10.704
HEATR1	GB45114	10.0739	10.0629	9.90034	9.5222	9.92672	8.81802	9.7007	9.2599	10.1892	9.67103	9.35533	9.10023	9.45118	9.35465	10.6663
HERC2	GB52252	10.4344	10.4339	9.98221	10.1236	10.4598	9.36425	10.0711	9.46365	10.8571	10.3843	10.2108	10.2207	10.325	9.72527	11.5194
HEX70b	GB51697	6.20666	5.76896	7.86806	6.53685	6.57861	6.13383	6.07334	6.53401	6.49877	7.15568	7.41758	8.0024	7.90857	4.86023	9.77033
Haspin	GB45351	7.91294	7.94526	7.72463	7.8537	8.13215	8.53204	8.37105	8.11424	8.3438	8.08097	8.28089	7.91071	8.29512	8.44591	5.81283
Hbg2	GB54549	7.68894	7.04792	9.52799	7.88513	8.65177	4.07505	6.6359	8.23432	7.85653	7.72585	6.56745	6.81399	6.83759	4.91746	11.2018
Hbg3	GB43247	7.23552	7.07279	5.58412	5.92063	6.56487	5.68084	6.45849	5.90971	6.79415	6.21004	5.93903	6.25928	6.0284	5.81971	7.35931
Hcf	GB52436	7.43703	7.25039	6.98301	7.51783	7.5523	8.05674	7.45	7.15172	7.23436	7.46884	7.79458	7.97883	7.91232	7.34297	6.63751
Hcs	GB44009	9.06781	8.98045	8.87561	8.75029	8.95911	8.61202	8.83341	8.76164	8.93012	8.72066	8.60701	8.43876	8.73919	9.12189	8.29787
Hdac3	GB43894	8.1646	8.11817	8.39723	8.41433	8.07061	7.79188	7.86893	8.07752	7.99863	7.86532	7.88065	7.84443	7.9198	7.43841	8.64625
Hdc	GB47379	6.19069	6.33689	7.45478	6.82408	6.89601	6.029	6.62393	6.92196	6.73784	7.08393	6.89074	6.25928	6.73928	6.1512	9.16124
Hem-2	GB50246	7.79223	7.83832	7.70062	7.8537	7.82894	7.8438	7.54158	7.41546	7.59735	7.71535	7.98908	8.22306	8.05153	7.64452	7.53695
Hex110	GB44996	8.17268	7.90435	11.2186	6.61425	7.82321	7.69907	7.67466	8.43495	9.8944	8.08097	8.24466	9.04686	8.51335	8.40402	13.0049
Hex70a	GB51698	7.37528	7.43422	8.1241	6.97395	7.54535	8.84373	7.57293	8.84935	8.50652	8.72589	8.57595	8.9653	8.42158	8.45049	8.92661
Hex70c	GB51696	5.06992	4.60434	7.3454	4.16112	4.93151	5.42616	4.49496	5.72924	5.92006	5.59613	5.88134	5.70635	6.30675	5.34409	7.69504
Hil	GB48425	9.41959	9.23792	8.5257	8.48925	8.70879	7.72699	8.51342	7.49868	9.24712	9.03303	8.63526	8.98435	8.75598	7.90041	10.9896
Hip1	GB55015	11.0226	11.1238	11.1052	10.5474	10.8719	9.71283	10.8562	10.2083	11.0603	10.7371	10.2223	9.8482	10.4878	10.8538	11.5194
Hip14	GB43411	6.09093	6.29501	6.11302	5.82999	6.22336	6.15057	5.75701	5.69377	5.75774	5.77147	6.21994	6.39459	6.78928	5.76097	5.09416
His2Av	GB43303	8.72478	8.52417	8.83578	8.52956	8.45839	9.20676	8.76457	9.01023	8.48964	8.54519	8.82832	8.68576	8.77876	8.96752	7.35931
Hiscl1	GB50822	7.25089	7.22104	6.53367	7.02331	7.80005	7.5191	7.36658	7.12575	7.34507	6.93776	7.1663	7.45085	7.1995	8.20154	6.28431
Hiscl2	#N/A	6.7206	6.46821	6.96965	6.24812	6.67122	4.43016	5.92407	5.25292	6.54333	6.87296	5.70922	6.00035	5.50963	4.73746	8.86146
Hk	GB50622	8.86346	8.89724	7.82429	8.97749	9.04034	8.66201	8.42353	8.36468	8.76923	8.20616	8.92125	8.95326	8.64766	9.24296	8.08599
Hlc	GB55090	7.62556	7.7384	7.86806	7.87622	7.45181	8.51933	7.73685	7.81902	7.7565	7.91203	7.87702	7.87029	7.85107	7.90041	7.35931
Hmgcr	GB51591	7.55927	7.66409	7.33503	7.60134	7.93903	7.2684	7.4089	7.40471	7.63882	7.66714	7.50979	7.61284	7.44748	7.36257	6.92042
Hmgs	GB44420	7.25851	7.38877	7.75604	8.02872	7.63971	8.05674	7.65136	7.99402	7.32614	7.53005	8.03876	7.80207	8.25728	7.90041	6.28431
Hml	GB41850	11.0125	10.9523	10.8264	10.6212	10.7662	9.87245	11.0179	10.0657	11.5901	10.8409	10.3312	9.92539	10.4676	10.641	11.8057
Hmt-1	GB54214	7.9416	8.09008	8.08755	8.01661	8.11818	8.28039	8.02204	7.87845	7.83886	7.78729	7.93063	8.04388	8.19088	8.18514	6.28431
Hmu	GB42082	9.09569	9.11989	9.14814	9.38929	9.06239	10.707	9.74534	9.98872	9.03274	9.63113	9.97953	9.83251	9.91923	9.98873	6.63751
Ho	GB49250	7.74964	7.91812	7.60898	7.8446	7.75861	8.62986	7.91855	8.21601	7.77986	7.94385	8.22191	8.12771	7.93832	8.4596	5.09416
Hr38	GB40074	5.71831	5.49698	5.6194	6.13213	5.93209	6.13383	6.8966	6.39905	6.78492	7.28214	7.02199	7.22075	6.30675	6.79735	7.83748
Hr39	GB45414	8.33985	8.27966	8.57492	8.35788	8.32287	8.25378	8.41318	8.44284	8.4981	8.5716	8.42728	8.37159	8.34871	7.97227	9.31513
Hr4	GB47037	8.36826	7.92268	8.99876	8.15192	9.00789	5.77089	8.1058	6.70201	8.54789	9.0288	8.71886	9.17883	8.0951	6.54545	10.6277
Hr46	GB47513	8.94588	8.85257	8.23963	8.58252	8.92208	8.77055	9.86143	8.28788	9.11393	10.1445	9.40917	9.69039	8.67661	9.54436	9.31513
Hr51	GB49738	5.33192	5.44594	4.90237	4.16112	5.21382	4.79468	5.51534	4.25676	5.67906	4.5555	4.92017	5.27011	4.9682	5.17109	6.28431
Hr78	GB52340	8.33626	8.37253	8.11202	8.92881	8.71499	8.6878	8.37816	8.4585	8.30893	8.4408	9.20979	9.34281	9.0116	8.04678	8.29787
Hr96	GB52904	7.48977	7.27202	7.0732	7.45336	7.24424	8.50329	7.65136	7.65193	7.35132	7.52405	7.63572	7.80744	7.81944	7.60395	6.92042
Hrs	GB54140	8.48639	8.29732	8.34143	8.43873	8.45469	8.38568	8.02204	8.00116	8.15321	8.18731	8.48574	8.58637	8.37341	7.90709	9.4977
Hs2st	GB47193	8.08121	8.01095	8.1656	8.06052	7.65915	7.58773	7.73685	7.64738	7.79827	7.78227	7.3974	6.93684	7.38938	7.90041	7.15657
Hs3st-A	GB41214	4.15136	3.95483	5.21757	4.78649	5.21382	4.15604	4.49496	4.41143	5.14095	5.15954	5.11418	5.79684	4.84064	3.93632	5.09416
Hs3st-B	GB47229	5.78414	5.80953	5.16998	5.77265	6.35723	5.33953	5.75701	5.78082	5.93698	5.72967	5.98079	6.09204	5.69893	6.38141	5.09416
Hs6st	GB42805	6.14169	6.16139	6.25279	6.24812	6.46483	6.13383	5.92407	6.46293	6.22511	6.11655	6.80119	6.55705	6.46938	5.4975	5.81283
Hsc70-3	GB49117	11.8259	11.8762	12.1124	11.8545	11.7618	12.6464	11.9393	11.9542	11.8091	12.0082	12.0929	12.1592	12.1732	11.9227	12.102
Hsc70-4	GB40866	13.8426	13.7718	14.2471	14.3936	14.1713	14.255	13.7575	14.3462	13.7932	13.8795	14.1604	14.8904	14.254	13.0663	15.0245
Hsc70-5	GB42297	12.0352	12.1205	11.9916	12.4375	12.1049	12.3179	12.0763	12.1462	12.1136	12.1925	12.0045	11.9688	11.8268	11.8677	11.6213
Hsc70cb	GB50730	10.2888	10.244	10.1257	10.4961	10.411	11.3771	10.4739	10.7625	10.203	10.2029	10.8114	10.9383	10.7792	10.9047	9.77033
Hsf	GB52628	9.85551	9.8724	9.76039	10.1301	10.1398	10.0705	9.84358	9.97609	9.54002	9.7019	10.4841	10.1727	10.5937	10.0352	10.2491
Hsp90	GB40976	12.1162	12.1351	12.3188	12.6672	12.4883	13.5913	12.0198	12.8583	11.8912	11.8741	12.9056	13.2255	12.9648	12.7538	11.9379
HtrA2	GB52918	8.72203	8.71488	8.69312	9.03462	8.66784	8.67925	8.62517	8.83143	8.66531	8.83166	8.71072	8.49963	8.39502	8.69007	7.69504
Hydr1	GB53831	8.13596	8.00236	7.45478	7.59592	8.31472	7.75438	7.884	7.59636	7.89553	7.46884	7.65285	7.84964	7.68986	8.17411	7.53695
Hydr2	GB53847	6.9642	6.72049	7.24927	7.79345	7.17383	8.70473	7.45	7.89773	6.84832	7.583	8.09931	8.30114	8.12451	7.11919	5.81283
IF-2mt	GB42024	10.3191	10.3926	10.2383	9.96993	10.1547	9.76085	10.3565	10.0295	10.5831	10.184	9.74147	9.19118	9.69923	10.6854	8.92661
IFT122	GB51120	8.0243	8.23272	8.20024	7.91588	8.10879	7.91833	8.22494	7.59163	7.98262	7.95281	7.82888	7.90572	8.06844	8.27569	7.35931
IFT80	GB49188	8.95995	9.01925	8.95887	8.43873	8.54794	8.84882	8.91629	9.02081	8.80606	8.57741	8.42728	8.35705	8.56906	9.05731	5.81283
IGFn3-10	GB53012	10.286	10.1471	10.5693	9.16644	10.6244	9.70163	11.4672	10.4348	11.0698	11.4354	10.8265	11.6092	10.772	11.368	12.123
IGFn3-11	GB53013	9.34294	8.80648	10.0753	9.54905	10.1166	6.08238	8.27149	8.14682	9.76009	9.70985	9.05594	9.62361	8.68102	6.59619	12.1975
IGFn3-12	GB46360	8.77869	8.66408	8.5257	7.70564	8.64853	8.39266	9.33859	8.9432	8.58545	9.27899	8.77268	9.02402	8.25137	9.61539	8.92661
IGFn3-13	GB52343	10.5009	10.4763	10.731	10.5752	10.4989	10.8156	10.5748	10.7344	10.2852	10.2938	10.2344	10.9757	10.6007	10.7665	10.3236
IGFn3-14	GB40916	6.60543	6.54155	5.98496	5.62888	6.99131	5.89594	5.86373	5.48054	6.74738	5.59613	6.19659	6.50493	6.0561	6.61271	7.15657
IGFn3-15	GB41645	9.37828	9.26328	9.81355	8.86723	10.0059	8.47395	10.2453	9.15013	10.1232	10.3517	10.0303	10.3206	9.66074	10.3514	11.7795
IGFn3-2	GB55483	13.2047	12.9219	13.6817	13.2101	13.663	11.1466	12.5165	12.3842	13.8921	13.5444	13.0593	13.7349	13.0046	11.4086	16.2628
IGFn3-4	GB47243	4.78824	4.98578	3.63819	4.35173	5.84305	4.70109	4.70712	4.07647	4.91196	4.04203	5.08815	5.47818	5.19113	5.07541	5.81283
IGFn3-5	GB44117	8.98997	8.67762	9.01507	8.79349	9.04281	7.29105	8.51019	7.66999	9.24712	9.51196	8.97835	9.44433	8.68541	7.44761	11.2787
IGFn3-6	GB53701	6.41312	6.06474	4.63936	4.97523	6.81724	4.59987	4.92983	4.58999	5.48378	4.87289	5.83646	5.6588	5.66308	5.66794	5.81283
IGFn3-7	GB44650	10.8009	10.84	10.5199	10.7376	10.6919	11.7076	10.8626	10.8987	10.5725	10.7313	11.0053	11.2461	11.107	11.1517	9.4977
IGFn3-8	GB49171	7.97894	7.89973	7.61756	7.62281	7.81746	7.40614	7.88898	7.39931	7.70863	7.63964	7.9236	7.9693	7.97107	7.8458	8.39317
IGFn3-9	GB46759	5.94589	5.99643	4.96044	4.70239	6.46483	4.70109	6.17576	5.03831	6.14031	5.85151	6.13647	6.39459	5.80123	6.40059	5.81283
IKKgamma	GB49918	9.48428	9.61673	9.48885	9.74515	9.47224	10.1155	9.67496	10.0554	9.61587	9.60012	9.64327	9.32237	9.69379	10.1167	7.53695
ILP-2	GB43560	7.05462	6.90744	7.41596	6.99059	6.92849	7.93279	7.62768	7.18353	7.03108	7.56557	7.86605	7.20456	7.6364	7.36257	6.92042
INTS2	GB55913	6.17454	6.1299	6.11302	6.17675	6.32492	6.24705	6.30173	5.87858	5.93698	6.03363	6.3838	6.22737	6.60605	6.52813	5.81283
INTS8	GB44176	8.42008	8.40872	8.06892	7.92887	8.2775	7.99839	8.19305	7.76125	8.19895	7.95727	7.8061	7.74172	8.10497	8.17411	7.69504
IPO7	GB48949	9.7716	9.84985	9.93159	9.83518	9.73419	9.83321	9.64435	9.66818	9.74001	9.79573	9.6771	9.78306	9.84858	9.33745	10.4836
IR-B	GB53353	7.40305	7.28626	6.1373	6.67741	6.73389	8.21883	8.47416	7.05182	7.95417	8.41185	8.11483	8.1574	7.96747	8.56895	7.15657
IRP30	GB50423	3.30644	2.82187	3.63819	2.82187	2.82187	2.82187	3.31001	3.25178	2.82187	2.82187	3.40863	3.31389	2.82187	2.82187	8.39317
IRS	GB49911	7.05462	7.22104	7.23818	7.42307	7.26132	7.56933	7.39493	7.68782	7.30696	7.28214	7.37176	8.03933	7.6089	7.45676	7.53695
Ial	GB45255	5.14039	5.12477	4.39697	4.74514	4.44295	5.11278	4.55158	5.00887	5.28327	5.05923	4.92017	4.85934	4.9682	4.97226	5.09416
Iap2	GB47454	8.61644	8.61706	8.62677	8.60426	8.53398	8.81542	8.6664	8.93203	8.60649	8.52731	8.48813	8.34235	8.60194	9.00536	7.53695
Iav	GB40818	5.7406	5.49698	5.39273	5.20064	5.72312	3.89004	5.04704	4.45867	5.61698	5.6193	5.18933	4.67043	5.40423	4.27134	6.28431
Idh	GB45258	10.1059	10.1086	10.3885	10.363	10.031	11.1232	10.2541	10.6602	9.89012	10.338	10.6647	10.5222	10.7381	10.2074	9.58099
Imd	#N/A	7.19636	7.19863	7.41596	7.21953	7.10925	7.92317	7.85371	7.7443	7.57616	7.583	7.69891	7.12936	7.50332	7.72995	5.09416
Imp	GB52056	10.8658	10.994	10.9738	10.1816	10.4551	10.8654	13.0364	12.0742	10.9699	12.8548	11.9321	12.3411	10.9608	13.1529	11.3983
ImpL2	GB43504	6.37133	6.39088	6.23044	5.84859	6.09487	6.13383	6.12548	6.16263	6.12566	6.33963	6.42448	6.1271	6.36305	5.87608	6.28431
InR-2	GB55425	4.07062	3.75456	4.56389	4.35173	5.05995	3.78146	3.31001	3.56114	4.83838	5.02403	5.43372	5.75233	5.21654	2.82187	7.69504
Incenp	GB45315	7.46364	7.79918	7.33503	6.73789	7.34378	7.55694	7.83832	7.44199	7.63882	7.74662	7.77907	6.79245	7.66783	7.7598	8.08599
Ing3	GB46202	6.9642	7.09724	7.03524	7.27488	6.97067	6.65038	6.84607	7.03097	6.649	6.91035	6.83166	6.67959	6.78107	6.51059	6.63751
Inos	GB51125	9.17622	9.23974	9.22583	8.95229	9.54884	9.53017	9.54998	9.17876	9.44835	9.11711	9.57649	9.36841	9.52528	9.85353	8.29787
Ints12	GB46245	8.39268	8.33883	8.66033	8.18475	8.20446	8.444	8.57348	8.40832	8.39306	8.36227	8.08992	7.81278	8.25728	8.84766	8.19582
Invadolysin	GB42313	7.09778	6.9794	6.62192	7.75994	7.63971	7.05558	6.97392	5.74665	7.60783	7.74146	8.35594	8.29352	8.0951	6.75337	8.19582
Ip3k	GB43168	9.85551	9.85463	10.0166	9.59725	10.0285	9.17875	10.0534	9.23134	10.057	9.78449	9.64327	9.75282	9.81292	9.63363	11.4546
Ipk2	GB48772	7.92255	7.76404	7.87522	7.89398	8.05603	7.62976	7.49652	7.71417	8.07611	7.97937	7.95499	8.30872	8.14059	7.34297	9.7344
Ipo9	GB55492	8.91251	8.98045	9.25082	8.69313	8.98755	8.03458	8.81258	8.25837	9.10102	8.81947	8.56017	8.62027	8.73072	8.45505	9.96894
Iscu	GB46920	10.6171	10.6242	10.5504	10.9864	10.5587	10.4701	10.1879	10.7488	10.0464	10.1811	10.3405	9.78306	10.1567	10.2019	11.2018
Iswi	GB49325	8.19665	8.04061	7.93817	8.41433	8.34302	8.2879	8.07551	8.12736	8.28954	8.10529	8.28363	8.53883	8.36796	8.01001	8.72161
Itpr1	GB46583	10.5887	10.5981	9.82283	9.18638	10.3879	9.29512	10.0907	9.27176	10.7424	10.0222	9.78576	9.69039	9.96236	10.3342	10.608
JHBP-1	GB48492	4.22632	4.26187	4.20153	4.35173	4.44295	3.89004	3.99103	3.85651	4.07096	3.95605	4.03877	4.38418	3.92953	3.79276	2.82187
JIL-1	GB40565	8.0726	7.92722	7.53847	8.22389	8.00632	8.52887	7.65722	7.77382	7.67415	7.68877	8.09306	8.52913	8.2661	7.82478	7.35931
Jarid2	GB42496	8.87093	8.74091	8.0937	8.34503	8.76664	8.76787	8.75095	8.37846	8.94671	8.65631	8.68392	8.25088	8.94908	9.38606	7.69504
JhI-1	GB51719	8.77339	8.86446	8.62677	8.79821	8.6058	9.32281	8.76999	8.90182	8.74809	8.72589	8.71276	8.67113	8.73707	9.00846	5.81283
Jhe	GB53755	5.71831	5.84896	6.99625	5.73306	6.32492	7.42673	6.12548	7.4101	6.71857	5.70828	6.96131	6.80326	6.36305	7.21939	7.53695
Jra	#N/A	7.29603	7.65316	7.62608	8.2309	7.65915	9.89966	9.13971	9.37021	8.55602	9.33659	9.36963	9.78033	9.62119	9.07225	8.64625
KAT2A	GB54338	7.82337	7.87642	7.63456	7.89839	7.6527	7.85902	7.84347	7.92805	7.75179	7.338	7.55604	7.3441	7.7287	7.78179	6.28431
KLHL10	GB48030	3.98284	3.86033	3.96189	4.29179	4.88571	3.89004	4.60566	4.14006	4.27104	4.38924	4.26697	3.5144	4.2491	3.61945	2.82187
KLHL5	GB49285	7.03699	6.88888	6.68879	6.90537	6.78211	5.93526	6.62393	6.2975	7.02326	7.14788	6.91228	6.71439	6.85334	5.66794	8.56672
KPNB1	GB40075	8.29615	7.95419	8.33625	8.54087	8.4057	7.07312	7.82277	7.6655	8.18152	8.44715	8.52808	8.56121	8.47074	7.09594	10.3236
Kap-alpha1	GB49637	8.5057	8.53015	8.41209	9.21667	8.87026	9.01417	8.44399	8.69493	8.19895	8.51828	9.28165	9.3575	9.14984	8.28084	8.64625
Kap-alpha3	GB53180	9.1272	9.3351	9.28079	9.6452	9.324	9.8047	9.01761	9.31968	8.95083	9.23194	9.31023	9.75698	9.42386	9.01157	9.7344
Kap3	GB55967	8.9101	9.02562	8.85402	9.36245	9.10313	9.88488	9.24062	9.48418	9.01908	9.03091	9.42792	9.26899	9.49934	9.65758	7.83748
Kay	#N/A	7.32536	7.24311	7.19295	7.93317	7.69097	7.3207	7.0562	7.30417	7.68903	8.13315	8.13019	8.59259	7.94566	6.03276	8.48256
Khc	GB47281	10.1698	10.2081	9.98055	10.3202	10.2335	10.8896	10.2483	10.394	10.1259	10.1128	10.4219	10.5616	10.4941	10.7218	9.16124
Knr	GB52331	5.47313	4.94861	6.25279	5.65035	5.56406	4.43016	5.11974	4.91632	5.95371	6.14841	5.60552	6.3509	5.56919	4.91746	7.69504
Knrl	GB48727	6.89732	6.8795	5.98496	6.10159	6.13279	6.56597	6.96448	5.90971	7.30051	7.18645	6.70565	6.75952	6.19941	6.49284	6.92042
Kr	GB41483	4.48382	4.38763	3.63819	3.83535	5.28458	4.79468	3.99103	3.6725	4.71937	3.86146	4.49836	4.90249	4.49533	4.73746	5.09416
Kr-h2	GB55373	8.8383	8.95176	9.22021	9.32205	9.09365	10.4069	9.26191	9.55019	8.94671	9.25385	9.52517	9.72478	9.57699	9.56139	6.28431
Ks-1	#N/A	3.77799	3.48702	2.82187	3.47063	4.50792	3.50654	3.65958	3.25178	4.07096	3.86146	4.15906	4.17062	3.66773	4.27134	2.82187
LCCH3	GB45542	7.04583	6.76193	6.25279	6.61425	7.17383	5.95451	6.37513	5.96997	6.76627	5.90866	6.28777	6.97556	6.4278	6.67694	6.28431
LIMK1	GB49680	7.20428	7.04792	6.31783	6.91412	6.91774	7.37822	6.81487	7.16453	6.95911	7.03403	7.38207	7.59434	7.48831	6.98638	6.28431
LKR	GB47970	5.47313	5.30933	5.78349	5.65035	5.84305	5.50763	5.15466	6.06958	5.33623	5.85151	6.17284	6.21115	6.22397	5.21647	2.82187
LOC100187599	#N/A	5.49971	4.98578	4.71045	4.61218	4.97574	4.59987	4.97008	5.14993	5.33623	4.98786	4.92017	4.72039	5.08436	5.81971	2.82187
LOC100188904	GB43306	4.59393	4.55375	4.08877	4.16112	4.56952	5.00239	5.04704	4.36219	4.44018	5.19136	4.76132	4.50704	3.92953	5.46073	2.82187
LOC100188940	#N/A	3.30644	3.63301	3.63819	3.28253	3.70007	3.50654	3.65958	3.93565	3.46087	2.82187	3.23819	2.82187	3.66773	2.82187	2.82187
LOC100217360	GB48697	3.30644	3.63301	2.82187	3.47063	3.70007	2.82187	3.50899	3.25178	3.46087	3.29479	3.23819	3.5144	3.24932	2.82187	2.82187
LOC100302106	#N/A	11.7514	11.8948	11.5301	11.9239	11.4982	11.6942	11.3232	12.0996	11.6201	11.5244	11.4	10.7163	11.2755	11.9132	9.31513
LOC100379261	GB49960	9.08289	9.10593	8.76814	8.81694	9.25973	8.20302	8.84114	8.30819	9.01516	8.5213	8.81698	9.01479	8.78081	8.86492	9.6209
LOC100576080	#N/A	5.82636	5.78939	5.39273	5.73306	6.22336	4.07505	6.68278	5.0953	6.36851	6.11655	5.56915	5.6588	5.83374	5.21647	7.15657
LOC100576082	GB54110	5.30183	5.25058	5.16998	5.10869	5.5067	5.99225	5.61712	5.69377	5.1997	4.98786	5.5318	5.50548	5.8655	6.1512	2.82187
LOC100576084	#N/A	4.15136	4.32651	3.96189	4.22842	4.37415	3.50654	3.99103	4.31072	4.67706	3.86146	3.90178	3.902	4.13295	3.61945	2.82187
LOC100576085	GB55960	8.7654	8.73055	8.60108	8.85822	8.65177	9.55217	8.77269	9.1291	8.48964	8.73371	8.67767	8.83754	8.67882	8.91216	7.15657
LOC100576086	GB53880	4.87518	4.91033	5.16998	4.40866	4.97574	4.96343	4.65744	5.17643	4.49145	4.95065	4.88993	4.17062	5.05627	5.46073	5.09416
LOC100576087	#N/A	4.83245	5.25058	4.39697	4.93963	4.73758	3.50654	5.43373	4.07647	4.33027	5.66451	3.74043	4.31746	4.13295	4.73746	2.82187
LOC100576088	GB47724	8.38574	8.47847	8.32059	8.42353	8.25214	8.99365	8.39927	8.95796	8.27648	8.27566	8.10865	7.91569	8.02752	9.05731	5.81283
LOC100576089	GB49450	4.15136	3.63301	3.40289	3.92777	3.94466	3.30825	3.78484	3.56114	3.91163	2.82187	3.64614	3.99992	3.24932	3.93632	5.09416
LOC100576096	GB40548	5.82636	5.86826	4.90237	5.44391	4.88571	3.98699	6.07334	4.67022	6.01869	6.31184	4.97859	5.09902	5.24148	5.56822	6.28431
LOC100576097	GB50006	6.86768	6.50535	7.4355	6.08607	6.93915	4.48946	6.05552	5.58156	7.20702	6.78508	6.64683	5.6588	6.26004	5.34409	9.4977
LOC100576098	GB53742	6.93592	7.01407	6.91493	7.23357	7.09979	7.37822	7.2316	7.32713	7.03108	7.05085	6.72203	6.98508	6.96623	6.9084	5.09416
LOC100576099	GB54292	6.10805	6.30911	6.43959	6.27569	6.15137	6.23142	6.38937	6.21317	6.1974	6.74422	5.83646	6.01917	6.50979	6.61271	2.82187
LOC100576100	GB44040	3.30644	3.29426	2.82187	3.47063	2.82187	3.50654	3.89378	3.42764	3.46087	3.63391	3.53808	3.31389	3.76433	3.79276	2.82187
LOC100576101	GB44435	9.16816	9.3075	9.23977	8.90493	9.09365	8.60302	9.44223	9.41768	9.41893	9.14277	9.11422	8.21502	9.09315	9.75148	8.72161
LOC100576102	#N/A	3.77799	3.29426	2.82187	3.73194	3.83097	3.50654	3.99103	4.0086	3.46087	3.86146	3.23819	3.5144	3.4242	3.38939	2.82187
LOC100576104	GB41259	7.30342	7.1053	7.12231	7.48889	7.11866	7.73251	7.72015	7.82306	7.39435	7.6507	7.62274	7.17162	7.59495	7.48385	7.15657
LOC100576105	#N/A	4.29641	4.11976	3.96189	3.73194	2.82187	4.48946	4.37282	4.45867	4.38654	3.86146	4.41132	3.99992	4.13295	3.93632	2.82187
LOC100576106	GB46438	4.59393	4.65292	4.7777	4.51477	3.83097	6.06481	5.51534	4.91632	4.71937	5.05923	5.18933	4.90249	5.26596	5.4975	2.82187
LOC100576108	#N/A	3.30644	3.48702	2.82187	3.28253	3.33407	3.50654	3.31001	3.42764	2.82187	3.75558	3.23819	2.82187	3.4242	3.79276	2.82187
LOC100576110	GB40273	7.64893	7.59148	8.13608	7.28165	7.93903	6.13383	7.59141	7.36644	8.16743	7.50588	7.43254	7.2526	7.45265	6.79735	9.80539
LOC100576111	GB40202	2.82187	3.29426	2.82187	3.47063	2.82187	3.30825	2.82187	3.56114	3.91163	3.63391	3.53808	3.79229	3.55697	3.93632	2.82187
LOC100576116	GB48598	8.31452	8.19177	8.62252	8.43873	8.90049	7.4604	8.07113	6.87592	8.27975	8.08505	7.6571	7.61896	8.20011	7.7598	8.08599
LOC100576118	GB55613	9.99638	9.90384	10.6869	9.27879	9.19912	9.41829	9.8229	9.43756	10.2811	10.6056	9.84463	9.74167	9.54956	8.51313	11.0198
LOC100576120	GB52257	6.3854	5.94292	5.84407	6.57054	6.01583	5.95451	6.22432	6.3771	6.27895	5.87082	5.85158	5.90228	5.69893	6.17374	5.09416
LOC100576121	GB48691	4.9566	4.74469	4.71045	5.36756	4.83822	5.33953	5.31674	5.06711	5.1997	5.09351	5.03451	5.4219	4.62151	4.67126	2.82187
LOC100576123	GB49445	5.92666	6.29501	5.93029	5.04365	5.88828	5.45386	6.1592	5.65736	6.18334	6.03363	5.67551	5.23759	6.0284	6.62904	6.28431
LOC100576125	GB50427	7.14792	6.74136	6.91493	6.97395	7.04164	7.22202	7.44323	6.99555	7.54922	7.60592	7.31906	6.63183	7.38938	7.99126	2.82187
LOC100576126	GB40836	3.30644	3.48702	3.40289	3.61319	2.82187	3.65661	4.37282	2.82187	3.91163	3.86146	3.53808	3.902	3.24932	4.5271	2.82187
LOC100576127	GB43513	4.78824	4.38763	5.39273	5.20064	4.93151	4.96343	4.07936	6.01352	4.20844	4.32807	4.49836	4.56399	5.02756	4.36308	5.81283
LOC100576129	GB50301	8.01534	8.01095	8.25069	8.2309	8.41334	7.42673	8.78611	8.31394	8.5881	8.94823	8.42728	9.26704	7.78301	8.75074	9.4977
LOC100576130	GB48796	5.57648	5.54619	5.01604	5.17069	6.2408	5.58453	5.56717	5.06711	5.22814	4.5555	5.16474	5.86105	5.38214	5.87608	6.28431
LOC100576131	GB44745	5.30183	5.4717	4.7777	5.34113	5.10012	6.16711	5.31674	5.45941	4.79994	5.22244	5.83646	5.81857	5.95669	5.46073	5.09416
LOC100576132	GB54923	8.31452	8.21425	8.34143	8.03673	8.43604	6.35189	8.32397	8.32252	8.80606	8.51828	7.51448	7.28375	7.80336	7.82478	10.2744
LOC100576134	GB56028	9.85551	9.72762	12.0525	11.1337	11.4254	10.1208	9.50362	12.6927	9.61327	9.50741	10.3358	11.5553	10.6301	9.93746	10.1435
LOC100576135	GB54881	4.64544	5.05711	5.51074	5.41893	5.31862	4.83899	5.61712	5.48054	4.91196	5.09351	5.75831	5.33288	5.13881	4.44797	6.28431
LOC100576136	GB48468	3.77799	3.63301	4.20153	4.01182	4.22255	2.82187	3.78484	4.25676	3.91163	4.12114	3.90178	3.902	3.76433	3.38939	6.28431
LOC100576139	#N/A	5.20731	5.28027	4.90237	5.82999	5.69784	6.09974	5.73465	5.95514	5.93698	6.03363	6.09913	6.03774	5.92695	6.30195	2.82187
LOC100576140	GB54223	7.89839	8.03641	7.80189	7.88956	7.6266	8.13799	8.02204	8.06052	7.77986	7.87479	7.80227	7.47128	7.7789	8.24438	6.28431
LOC100576143	GB45416	6.35713	6.37758	6.40015	6.47888	6.15137	7.46704	6.64777	6.71079	6.34349	6.41989	6.94747	6.59493	6.91465	7.33307	5.09416
LOC100576145	#N/A	2.82187	3.29426	2.82187	3.47063	2.82187	3.50654	3.50899	3.25178	2.82187	3.29479	3.53808	3.31389	3.4242	3.38939	2.82187
LOC100576146	GB40271	4.83245	4.50093	4.39697	4.46291	4.50792	4.74875	4.37282	4.67022	4.8757	4.95065	4.85898	4.85934	4.77177	4.17125	5.09416
LOC100576147	GB50374	4.29641	4.11976	3.8153	4.08921	3.33407	4.54594	4.07936	4.2	4.20844	4.65475	4.10068	4.08885	4.06966	4.27134	2.82187
LOC100576148	#N/A	6.19069	6.45561	5.78349	6.51394	6.2408	7.19825	6.31672	6.59223	6.11087	5.99904	6.45424	6.53123	6.56832	6.57948	2.82187
LOC100576149	GB42589	3.50401	3.29426	3.40289	2.82187	3.54253	3.50654	2.82187	3.25178	3.60138	3.29479	3.23819	3.31389	3.24932	3.38939	2.82187
LOC100576151	GB48599	6.75341	7.06455	6.68879	6.70797	6.73389	7.14121	6.9833	7.18981	7.14355	6.66978	6.8762	6.47813	6.97345	7.5279	5.09416
LOC100576152	GB41622	3.77799	3.95483	3.63819	3.47063	3.94466	3.50654	3.89378	2.82187	4.49145	4.32807	3.23819	3.5144	3.24932	3.93632	5.09416
LOC100576153	GB45224	6.05604	5.96099	5.68738	6.35532	5.86584	5.7039	5.88413	5.95514	5.83221	5.87082	5.82118	5.88182	5.54962	5.87608	2.82187
LOC100576155	#N/A	8.74659	8.88795	8.9004	8.41433	8.86748	9.54905	9.1584	9.55019	8.88565	8.96824	9.30753	8.3125	9.43563	9.71389	7.53695
LOC100576157	GB43941	8.82298	8.8786	8.14203	8.06444	8.11349	8.58788	10.4267	8.50698	9.13399	10.9069	9.54133	9.69329	8.49345	9.72716	9.04869
LOC100576158	GB41408	4.83245	4.38763	4.84156	4.65811	4.7889	4.74875	4.80094	4.67022	5.07949	4.95065	4.15906	4.44723	4.2491	4.67126	6.28431
LOC100576159	GB49444	5.64921	5.90609	5.78349	5.44391	5.64587	5.50763	6.30173	5.83055	6.03448	5.83192	5.93903	4.94423	5.46844	6.59619	2.82187
LOC100576161	#N/A	15.3775	15.2139	16.3847	16.3885	16.1973	14.3592	14.7434	15.2495	14.5871	14.8933	15.5404	16.0969	15.8614	13.6513	17.2805
LOC100576162	GB46023	6.98274	7.0311	6.84344	7.36051	7.128	8.19904	7.27802	7.37748	6.95088	7.14788	7.62708	7.69618	7.74563	7.51044	5.81283
LOC100576163	GB50444	3.88621	3.95483	3.63819	3.28253	3.70007	3.30825	3.50899	3.85651	3.82045	3.29479	3.23819	3.31389	3.55697	3.38939	2.82187
LOC100576164	GB40761	3.65356	3.29426	3.8153	3.92777	3.70007	3.50654	3.50899	3.42764	3.46087	3.75558	3.97273	4.08885	4.06966	3.79276	2.82187
LOC100576165	#N/A	6.26877	6.1299	6.08833	6.49066	6.65836	6.85717	6.76131	6.4733	6.4292	6.52032	6.40428	6.1271	6.63371	7.28251	6.28431
LOC100576167	GB53327	3.65356	4.04072	4.39697	3.73194	4.04604	3.50654	4.37282	4.63076	4.27104	3.95605	3.74043	3.31389	4.06966	3.61945	2.82187
LOC100576168	#N/A	2.82187	2.82187	2.82187	2.82187	3.33407	3.50654	2.82187	2.82187	3.46087	3.29479	2.82187	3.79229	3.4242	2.82187	2.82187
LOC100576169	GB42244	6.41312	6.33689	6.9288	6.68767	6.79392	6.70776	6.95498	7.07914	5.81396	6.90109	7.38207	7.86515	6.98778	7.10761	6.92042
LOC100576172	#N/A	3.30644	3.29426	3.8153	3.61319	2.82187	3.65661	3.50899	3.25178	2.82187	4.04203	3.82486	3.66611	3.66773	2.82187	2.82187
LOC100576173	#N/A	5.44603	5.74822	5.98496	5.92063	5.21382	5.14762	6.14244	5.6009	5.43634	5.87082	5.89599	5.53225	5.73387	5.21647	6.63751
LOC100576174	GB45908	6.5061	6.63382	6.49678	6.36817	6.07552	7.29105	6.57504	6.86024	6.21132	6.48348	6.23147	6.63183	6.4278	6.86776	2.82187
LOC100576176	GB44992	7.34697	7.49062	7.11019	7.34119	7.09026	7.62383	7.51601	7.38844	7.32614	7.09208	7.36657	7.22878	7.53776	7.66044	7.35931
LOC100576179	GB43404	3.77799	3.63301	3.40289	3.47063	3.33407	2.82187	2.82187	2.82187	3.46087	2.82187	3.23819	2.82187	2.82187	3.38939	2.82187
LOC100576182	GB54554	4.22632	3.75456	3.8153	2.82187	3.54253	3.50654	3.78484	3.85651	4.07096	4.04203	3.40863	3.902	4.00212	3.61945	2.82187
LOC100576183	#N/A	5.27105	4.91033	5.01604	4.65811	4.88571	4.36766	4.37282	4.2	4.7603	4.95065	4.61804	3.902	4.4031	4.27134	2.82187
LOC100576184	GB41618	4.54014	4.55375	4.56389	4.56446	4.37415	4.74875	4.84536	4.70846	4.98157	5.05923	5.03451	4.90249	4.53888	4.36308	6.28431
LOC100576185	GB45229	8.25869	8.34224	7.96529	7.45336	7.90145	7.84889	8.10151	7.72716	8.46105	7.99247	7.66556	7.22878	7.8074	8.53916	7.69504
LOC100576186	GB44932	4.42467	4.26187	4.08877	3.83535	4.73758	4.30153	4.65744	4.45867	4.49145	4.5555	4.21436	4.08885	4.35407	4.60131	2.82187
LOC100576187	GB55958	7.38228	7.29332	7.37607	7.36051	7.4065	7.63566	7.20782	7.30994	7.22758	6.98232	7.51916	7.48474	7.3232	6.94792	7.53695
LOC100576189	#N/A	6.5189	6.58843	6.25279	6.38091	5.99536	5.33953	6.45849	6.2007	6.40524	6.55622	6.02135	5.4219	5.7847	5.73064	6.92042
LOC100576192	GB42903	4.42467	3.86033	3.8153	4.01182	3.33407	3.50654	3.65958	3.42764	3.46087	3.63391	3.82486	3.66611	3.85079	3.61945	2.82187
LOC100576193	GB48342	12.9829	12.7687	5.21757	6.71802	6.22336	10.0975	12.9103	3.93565	14.5647	13.9658	8.16341	8.66524	6.55873	9.38128	11.2018
LOC100576194	GB50277	4.15136	4.32651	3.63819	4.16112	4.44295	5.14762	4.1606	4.41143	4.20844	4.74659	5.03451	5.5585	4.4031	5.34409	2.82187
LOC100576195	GB52685	9.16209	9.29525	9.26725	9.57542	8.98242	9.61323	9.48728	9.59808	9.4055	9.27899	9.0751	8.76502	9.0116	10.0075	6.63751
LOC100576196	GB50295	9.98725	9.8946	10.5279	9.24634	10.1907	9.03663	9.59183	9.7091	10.0731	9.73343	9.17024	9.60219	9.24807	9.70242	11.2787
LOC100576198	GB54794	6.35713	6.4429	5.68738	6.74773	6.41971	6.75207	7.44323	5.94016	6.30512	6.88239	6.8615	5.79684	5.42597	6.17374	5.81283
LOC100576199	#N/A	4.07062	3.63301	2.82187	4.08921	4.13804	3.98699	4.37282	4.14006	4.33027	4.7901	5.08815	5.39287	4.80667	3.61945	5.81283
LOC100576207	#N/A	3.30644	2.82187	3.8153	3.28253	2.82187	2.82187	3.78484	3.42764	3.60138	3.48776	3.23819	2.82187	3.24932	3.61945	2.82187
LOC100576211	#N/A	3.65356	2.82187	2.82187	3.28253	2.82187	2.82187	3.31001	3.25178	3.46087	3.63391	2.82187	2.82187	2.82187	3.79276	2.82187
LOC100576213	GB52902	3.77799	3.29426	2.82187	2.82187	3.33407	2.82187	3.50899	2.82187	3.60138	3.75558	2.82187	3.5144	2.82187	2.82187	2.82187
LOC100576215	#N/A	4.15136	4.26187	4.08877	2.82187	3.54253	4.43016	4.236	3.93565	3.99458	4.04203	4.26697	4.61837	3.24932	4.67126	2.82187
LOC100576216	GB48619	7.22777	7.47828	7.15806	7.2951	7.44436	7.7103	7.41583	7.31569	7.29403	7.48748	7.26436	7.27602	7.32883	7.54515	7.35931
LOC100576221	GB49500	7.87382	8.02797	7.83903	7.76959	7.68466	7.59986	8.04008	7.90156	7.874	7.87006	7.70303	7.16327	7.56664	8.08853	7.96709
LOC100576222	GB46056	6.29884	6.30911	5.8734	6.47888	5.59187	6.09974	6.41742	5.84675	6.45277	6.56799	6.21994	6.07417	6.3408	5.81971	5.09416
LOC100576223	#N/A	5.62539	5.57015	5.26354	4.97523	5.24966	5.53374	5.43373	5.52184	5.28327	5.22244	5.39244	5.13504	5.68112	6.10501	5.81283
LOC100576224	GB49982	3.88621	3.75456	3.63819	3.28253	2.82187	3.30825	3.65958	3.25178	3.71846	3.29479	2.82187	2.82187	2.82187	2.82187	2.82187
LOC100576225	GB43501	6.88751	7.08099	5.30798	5.67149	5.31862	6.36626	7.0913	5.20242	7.29403	7.55383	6.40428	6.42299	5.73387	6.64519	7.69504
LOC100576226	GB52806	7.23552	7.72802	7.3454	7.69554	7.35177	8.04348	8.00836	7.87067	7.70863	7.62849	7.67816	7.51129	7.67226	8.40402	6.28431
LOC100576227	GB49354	8.35413	8.47227	8.23407	8.41125	8.21762	8.8076	8.67508	8.60167	8.68027	8.43761	8.42479	8.07534	8.52074	8.88197	6.28431
LOC100576230	#N/A	5.64921	5.97882	5.78349	5.60707	5.59187	4.59987	5.04704	5.17643	5.55199	5.49936	5.1397	5.17011	5.44737	5.9566	5.81283
LOC100576233	GB51185	4.07062	3.86033	3.96189	3.47063	3.70007	3.89004	3.65958	3.6725	3.82045	3.75558	2.82187	3.31389	3.55697	3.79276	2.82187
LOC100576234	GB55851	7.23552	6.9794	7.26027	6.54817	7.19176	5.68084	6.51147	6.22553	7.0154	6.91954	6.79346	6.86647	6.82167	6.52813	8.29787
LOC100576236	GB54153	6.37133	6.08132	7.18141	7.19821	6.85153	5.77089	6.30173	6.64818	6.26568	6.25457	6.12413	7.32925	6.21174	5.30287	8.86146
LOC100576240	#N/A	2.82187	2.82187	2.82187	3.28253	3.54253	3.50654	3.31001	2.82187	3.27554	3.29479	3.64614	3.5144	2.82187	2.82187	2.82187
LOC100576242	GB48948	10.3191	10.3703	10.3594	9.37356	9.73724	9.27069	10.5002	9.71236	10.8805	10.183	9.12958	8.70599	9.44343	10.9039	9.80539
LOC100576243	#N/A	3.88621	3.29426	2.82187	3.61319	3.83097	4.07505	4.49496	4.07647	4.67706	4.44732	4.03877	3.5144	4.45012	3.79276	5.09416
LOC100576246	GB40187	3.50401	3.75456	3.63819	2.82187	2.82187	3.30825	2.82187	2.82187	3.46087	2.82187	3.40863	3.5144	2.82187	3.61945	2.82187
LOC100576247	#N/A	9.51636	9.54023	10.1197	9.5986	9.91196	9.2008	9.74259	9.79173	9.88367	10.0359	9.73044	10.2466	9.70573	8.79822	10.2491
LOC100576248	GB50647	3.77799	2.82187	3.63819	3.28253	3.54253	2.82187	3.50899	3.42764	3.27554	3.48776	2.82187	2.82187	2.82187	2.82187	2.82187
LOC100576249	GB50777	7.50906	7.4406	7.27119	6.7672	7.20064	6.47624	7.6036	6.74538	7.73277	7.09208	7.08652	7.15487	7.12372	6.36195	7.69504
LOC100576251	GB41731	5.96486	5.61686	6.25279	5.65035	6.13279	4.30153	5.46147	5.17643	6.46441	6.48348	6.34192	6.97556	6.21174	4.06067	9.31513
LOC100576253	GB52938	2.82187	3.29426	2.82187	2.82187	2.82187	2.82187	2.82187	3.56114	3.46087	3.48776	2.82187	3.66611	2.82187	3.38939	2.82187
LOC100576254	GB55617	6.73162	6.54155	6.56963	5.60707	5.7963	5.58453	6.25579	5.06711	7.40641	7.49364	5.5506	5.92245	5.24148	4.27134	8.19582
LOC100576257	#N/A	3.65356	3.75456	4.48338	4.08921	4.22255	3.78146	4.1606	4.45867	3.71846	4.12114	4.15906	4.8147	3.76433	4.06067	2.82187
LOC100576258	GB51566	7.05462	7.18349	7.27119	7.11721	6.97067	7.29852	7.08261	7.20228	6.92592	7.25337	7.32442	7.12075	7.1995	7.40099	5.09416
LOC100576260	#N/A	5.14039	5.22022	5.12062	5.14005	4.50792	5.74892	5.56717	5.1229	5.31001	5.02403	5.39244	5.27011	5.58848	5.4975	5.09416
LOC100576261	GB41391	7.73879	7.91354	7.87522	7.76477	7.5661	8.44063	8.25614	8.12081	7.9335	8.07277	8.04525	7.59434	8.15015	8.1961	7.15657
LOC100576263	GB43299	3.30644	2.82187	3.63819	2.82187	3.33407	2.82187	3.31001	2.82187	2.82187	3.75558	3.53808	3.31389	3.4242	3.61945	2.82187
LOC100576265	#N/A	5.62539	5.61686	4.90237	4.51477	4.88571	4.74875	5.18868	4.91632	5.55199	4.7901	4.61804	4.56399	4.62151	6.1512	5.09416
LOC100576266	GB49355	7.03699	7.03953	7.03524	7.28165	7.09979	7.2454	7.18363	6.85233	7.33878	7.2091	7.10533	7.35147	7.2947	7.01146	8.08599
LOC100576267	GB54813	5.60115	5.54619	5.58412	5.60707	5.77233	6.35189	6.0192	5.92502	5.52962	5.83192	5.32806	5.47818	5.60751	6.1512	2.82187
LOC100576270	GB46984	5.23956	5.39293	5.75218	5.67149	5.56406	6.85717	5.37649	6.1235	5.14095	5.05923	5.64095	5.3632	5.68112	5.79065	5.81283
LOC100576271	GB42787	8.02876	7.86699	8.5661	8.14081	8.22198	7.68775	8.1809	8.6157	8.48396	8.39222	8.29185	8.09739	8.26022	7.5537	9.80539
LOC100576272	GB55918	7.44373	7.64214	7.227	7.44132	7.22696	7.78658	7.78045	7.56292	7.71349	7.40491	7.15432	7.00393	7.38398	8.17411	5.09416
LOC100576273	GB50166	2.82187	3.75456	3.8153	2.82187	3.33407	3.89004	3.50899	3.6725	3.27554	3.29479	3.53808	3.5144	3.55697	3.79276	2.82187
LOC100576274	#N/A	5.7406	5.41969	5.16998	5.56239	5.4159	6.44953	5.82202	5.90971	5.71896	5.79192	5.92483	6.03774	6.01435	5.56822	2.82187
LOC100576277	#N/A	7.76576	7.71756	7.83903	6.47888	6.96024	5.36903	6.97392	6.82835	6.94261	6.94678	6.58548	6.14432	6.92214	6.2393	8.39317
LOC100576279	GB43230	5.39017	4.98578	7.41596	6.62497	7.08066	2.82187	4.84536	4.85074	6.51004	6.88239	6.29876	6.91709	6.0561	2.82187	10.1435
LOC100576282	GB40184	3.50401	3.48702	2.82187	3.28253	3.33407	3.30825	3.31001	2.82187	2.82187	2.82187	3.53808	2.82187	2.82187	2.82187	5.09416
LOC100576283	#N/A	4.48382	4.38763	4.48338	4.78649	4.44295	3.30825	4.1606	4.45867	4.38654	4.04203	4.41132	4.67043	4.49533	3.61945	5.09416
LOC100576284	GB52448	7.28861	7.25039	4.08877	5.20064	5.69784	3.89004	5.64144	3.85651	8.1745	6.17956	6.33125	5.3632	4.90599	5.12411	8.64625
LOC100576286	GB44925	8.51208	8.4535	8.29944	8.68805	8.56176	8.75979	8.55478	8.58987	8.47827	8.53925	8.40473	8.0842	8.44248	8.69007	8.39317
LOC100576287	GB44563	4.22632	4.26187	3.8153	4.35173	4.30093	3.65661	3.31001	3.25178	3.82045	3.29479	3.74043	3.5144	3.92953	4.36308	5.09416
LOC100576288	#N/A	7.76041	7.95419	8.88629	7.74533	8.04129	7.44703	8.02657	8.55631	8.35627	8.36563	8.20751	7.22075	7.55227	8.29619	8.86146
LOC100576289	GB55191	7.40991	7.49062	7.27119	7.59048	7.28656	8.06113	7.8486	7.83511	7.54922	7.33113	7.57413	7.53736	7.60426	8.35111	2.82187
LOC100576290	GB55743	4.91653	4.78817	4.71045	4.51477	4.68406	4.54594	4.97008	4.94791	4.79994	4.32807	4.53959	4.8147	3.92953	3.61945	2.82187
LOC100576291	GB40740	6.45372	6.32307	5.26354	4.74514	6.80563	5.87586	5.80068	4.91632	6.71857	5.96359	6.12413	6.80326	6.10991	6.45666	6.92042
LOC100576293	GB42492	7.91775	7.69107	7.8094	8.09548	7.5523	8.21489	7.40193	7.62441	7.79369	7.55971	7.462	8.10176	7.82344	7.31306	7.53695
LOC100576295	#N/A	5.10562	4.19318	4.30354	4.16112	4.30093	4.59987	4.84536	4.74556	4.27104	4.44732	4.36521	3.902	4.4031	5.12411	2.82187
LOC100576296	GB52259	9.37654	9.33852	9.09699	9.44152	9.13584	9.51265	9.28667	9.40158	9.01122	9.16221	9.20545	8.86864	9.18901	9.41446	7.15657
LOC100576298	GB40270	8.22412	8.1535	7.96529	8.31568	8.14139	8.66201	8.12706	8.21908	8.33437	8.34196	8.08677	7.87029	7.68109	8.12337	5.09416
LOC100576299	#N/A	2.82187	2.82187	4.30354	2.82187	3.33407	3.30825	3.31001	5.6388	2.82187	3.48776	3.23819	2.82187	2.82187	2.82187	2.82187
LOC100576300	GB41160	6.00204	6.11389	5.75218	5.58491	5.56406	5.68084	5.86373	5.41615	6.4292	5.59613	5.45391	6.19473	5.80123	6.19593	6.28431
LOC100576307	GB43409	6.26877	6.01382	6.73697	6.07037	6.32492	5.21468	5.73465	6.04183	6.14031	6.55622	5.77429	5.86105	5.81758	4.91746	8.29787
LOC100576318	#N/A	6.84757	7.05626	6.82871	6.73789	6.87394	6.68509	7.12557	7.35532	6.82149	6.91035	7.1841	6.25928	7.14304	6.84001	5.09416
LOC100576319	#N/A	4.64544	4.69965	4.39697	4.35173	4.56952	4.59987	4.30651	4.7816	4.44018	4.83217	4.92017	4.90249	5.16523	4.5271	5.81283
LOC100576320	GB50737	8.33626	8.21796	8.67682	9.40485	8.64853	6.36626	6.44493	6.77078	8.18852	7.28214	7.38207	8.46952	8.02752	6.52813	8.98894
LOC100576321	GB40859	6.10805	6.16139	5.75218	6.31606	6.67122	6.77371	6.10831	5.76384	6.21132	6.06739	6.68074	7.18819	6.96623	6.40059	6.28431
LOC100576326	GB52597	10.5435	10.5606	11.3922	10.8459	10.6809	11.0384	10.352	10.9591	10.5851	10.8024	10.8475	11.1939	11.0743	9.94721	12.0445
LOC100576330	#N/A	4.22632	4.55375	5.01604	5.41893	4.73758	4.15604	3.78484	5.78082	3.82045	4.26337	4.36521	4.38418	3.85079	4.91746	2.82187
LOC100576331	GB41458	3.65356	3.63301	3.40289	3.28253	3.33407	3.30825	3.50899	3.25178	3.71846	3.29479	3.23819	3.5144	2.82187	3.38939	2.82187
LOC100576333	GB41265	6.90707	7.05626	6.87247	6.70797	7.05149	5.77089	6.76131	6.18812	7.09216	6.79511	6.8541	7.00393	6.58731	6.51059	7.35931
LOC100576336	#N/A	6.29884	5.99643	6.38001	5.79202	6.01583	6.19963	6.57504	6.21317	6.40524	6.17956	6.12413	5.79684	6.17441	6.88143	5.81283
LOC100576337	GB45426	7.05462	7.02261	6.81382	7.26124	6.85153	7.64154	7.08261	7.31569	6.90904	6.99107	7.36657	7.23676	7.09092	7.33307	2.82187
LOC100576338	#N/A	4.07062	3.63301	2.82187	3.61319	3.83097	4.30153	3.50899	3.6725	3.91163	4.19463	4.10068	3.79229	4.00212	4.27134	2.82187
LOC100576346	#N/A	9.72156	9.76107	9.53931	9.71051	9.7925	10.2986	10.1089	9.86402	9.68175	9.87326	10.5184	9.82857	10.6527	10.7256	7.15657
LOC100576348	GB47191	7.59581	7.65316	7.60036	8.03673	7.42177	8.42709	7.58527	8.20985	7.59735	7.8072	7.87702	7.79129	7.84716	8.31641	5.09416
LOC100576349	GB54569	6.28389	5.78939	5.54792	5.2586	5.17698	5.30939	6.28658	5.27748	5.67906	6.28349	5.56915	5.72953	5.60751	6.28137	6.63751
LOC100576355	GB53420	7.72786	7.83832	9.06289	8.3801	8.80782	7.79715	8.13547	8.79491	8.15678	8.89577	8.04201	8.93869	8.42945	8.07672	9.36299
LOC100576358	#N/A	7.14792	7.09724	6.65575	7.55182	7.19176	7.71589	6.92609	7.72284	7.17916	7.19404	7.70303	7.42315	7.3232	7.81059	6.28431
LOC100576359	GB52282	7.17234	7.1053	7.12231	7.51783	7.23563	7.61787	6.97392	7.38297	6.81244	7.09208	7.30287	7.04999	7.22993	6.98638	6.92042
LOC100576361	GB50466	3.30644	3.29426	3.63819	3.28253	3.83097	3.30825	3.31001	3.25178	3.46087	3.29479	3.53808	3.5144	3.55697	3.79276	5.09416
LOC100576366	GB41206	8.20849	8.37586	8.17143	8.15928	8.01137	8.64457	8.53266	8.50698	8.48396	8.18731	8.09306	7.68456	8.10169	8.6745	6.28431
LOC100576369	GB45540	9.00362	9.1278	7.98529	7.75022	8.23929	8.78389	8.77538	8.39211	9.42782	9.05399	8.23333	8.34604	8.10169	8.594	7.53695
LOC100576370	GB46637	4.9566	4.26187	3.8153	4.01182	3.83097	3.65661	4.43549	2.82187	4.91196	4.91236	4.45565	4.67043	4.35407	3.93632	7.15657
LOC100576373	GB40691	8.36121	8.29381	8.26167	8.19195	8.14139	8.6	8.4372	8.3619	8.34066	8.07277	7.95154	7.98358	8.08516	8.54773	5.81283
LOC100576374	GB41744	7.96505	7.7123	7.82429	7.23357	7.81168	7.08181	7.98991	7.50372	8.18852	7.51802	7.24188	6.88693	7.59495	8.38021	2.82187
LOC100576377	GB47179	6.84757	6.83168	6.79878	6.59256	7.07101	6.24705	7.2316	6.65729	7.13632	6.99976	6.8615	6.22737	7.08427	7.47488	5.09416
LOC100576378	GB54572	7.47676	7.7228	7.28203	7.43526	7.19176	8.48052	7.88898	7.94668	7.74231	7.60023	7.66556	7.6067	7.81544	8.61863	2.82187
LOC100576380	#N/A	4.99547	4.26187	4.71045	4.46291	5.21382	4.30153	4.37282	3.56114	4.83838	5.22244	4.85898	5.45033	5.11187	3.38939	7.53695
LOC100576381	GB52591	8.22412	8.23272	7.69253	8.39264	7.87952	9.36247	8.36391	8.80922	8.08738	8.16434	8.63956	8.74561	8.72859	8.61046	2.82187
LOC100576382	#N/A	5.41839	5.25058	5.47252	5.34113	5.4771	4.96343	5.18868	5.14993	5.55199	5.25282	5.1397	4.90249	5.08436	5.76097	7.15657
LOC100576383	GB55923	6.2535	6.08132	6.58727	6.07037	6.07552	5.85549	6.09093	6.0968	6.3931	5.98143	5.93903	5.5585	6.09665	6.03276	6.92042
LOC100576384	GB45612	8.86844	8.94057	8.91437	8.66755	8.96952	9.42681	9.95231	9.52316	9.61067	10.0179	9.89131	10.0493	9.43433	10.0743	10.0876
LOC100576387	GB51126	3.65356	3.86033	2.82187	3.28253	2.82187	3.78146	2.82187	2.82187	3.27554	3.29479	3.53808	2.82187	2.82187	2.82187	2.82187
LOC100576390	#N/A	3.98284	4.19318	3.40289	4.08921	4.13804	4.36766	4.49496	4.5478	4.33027	4.19463	4.57945	4.31746	4.06966	5.17109	2.82187
LOC100576392	GB53500	3.50401	3.86033	3.8153	3.92777	4.30093	3.78146	4.43549	4.2	4.20844	4.50264	4.49836	4.72039	4.49533	4.44797	5.81283
LOC100576397	#N/A	4.29641	4.78817	4.20153	4.70239	3.83097	3.98699	4.49496	4.45867	4.20844	4.44732	4.26697	4.50704	4.35407	3.61945	2.82187
LOC100576400	GB46060	7.23552	7.30036	7.11019	7.09431	7.03171	7.4604	7.59141	7.52373	7.41837	7.45628	7.17819	6.84571	7.07759	7.49277	6.28431
LOC100576401	#N/A	6.5061	6.55342	7.02236	6.74773	6.78211	7.31334	6.81487	7.14527	6.58654	6.43284	6.64683	6.24341	6.95168	7.03611	2.82187
LOC100576402	GB41745	9.24102	9.41002	9.01182	8.74296	8.9194	8.77323	9.18498	8.57798	9.57111	8.99884	8.81698	8.62937	9.02031	9.47863	8.56672
LOC100576403	GB52460	3.50401	2.82187	2.82187	3.47063	3.83097	2.82187	3.31001	3.25178	2.82187	3.29479	3.23819	2.82187	3.4242	3.38939	2.82187
LOC100576404	GB41378	7.79223	7.67495	8.60969	7.7006	8.40186	6.55349	7.3879	7.0993	7.95417	7.93935	7.64002	8.19879	7.59495	6.19593	9.99953
LOC100576405	GB52601	6.89732	6.63382	6.81382	6.65667	7.20064	6.029	6.51147	6.28575	7.06194	6.84426	6.96131	7.42315	7.03684	6.57948	8.86146
LOC100576411	GB50168	5.71831	6.14574	5.84407	6.32927	6.32492	7.03782	6.28658	6.2007	6.22511	6.29774	6.23147	6.56979	6.30675	6.78284	5.09416
LOC100576412	GB44181	6.67564	6.91664	6.38001	6.61425	6.40434	7.48678	7.00187	7.25712	6.92592	6.98232	6.94747	6.59493	7.03684	7.51044	6.28431
LOC100576413	GB44685	9.68251	9.74058	9.99706	8.97957	9.60332	8.89381	9.89402	9.38939	10.0348	9.45163	9.12346	8.67113	9.15143	9.83088	9.21438
LOC100576414	GB55263	6.85766	6.99684	8.82102	8.4834	8.50206	8.35739	7.8123	8.41101	7.16502	6.92868	8.11792	8.62027	8.54268	7.5279	6.92042
LOC100576417	#N/A	5.06992	4.91033	5.65381	4.46291	4.73758	4.70109	5.37649	4.97874	5.38721	5.19136	4.31717	5.02391	4.4031	4.97226	5.09416
LOC100576418	GB50610	10.5774	10.0232	11.6705	10.878	11.2374	6.35189	8.99004	7.95774	12.0266	11.8072	10.7164	11.8971	10.4644	6.67694	13.7551
LOC100576419	#N/A	4.9566	4.91033	4.71045	4.78649	5.35183	5.00239	5.37649	4.63076	4.7603	4.91236	4.36521	4.38418	4.73587	4.5271	5.81283
LOC100576420	#N/A	5.84701	5.74822	5.8734	5.22993	5.28458	5.53374	6.1592	5.98464	6.1974	5.88987	5.08815	5.39287	5.52977	6.49284	2.82187
LOC100576421	GB44876	8.95762	8.95621	9.12128	9.07797	8.82798	9.47037	9.1144	8.89225	9.1768	9.001	8.90528	9.49336	9.27308	8.97389	9.96894
LOC100576422	GB52009	8.95059	8.86683	9.23142	8.90712	8.8591	8.69629	8.84884	8.99957	8.75517	8.75691	8.6092	8.33494	8.57143	8.81962	7.53695
LOC100576423	GB48802	4.83245	5.18915	5.8734	4.22842	5.99536	4.23122	4.37282	4.41143	4.67706	4.5555	4.61804	4.72039	5.50963	4.5271	2.82187
LOC100576425	GB53908	8.21632	8.07378	8.26713	7.95025	8.23066	7.7047	8.79144	7.81902	8.44362	8.44715	7.73151	7.26045	7.90857	8.55626	8.08599
LOC100576427	GB47978	4.36235	4.19318	4.56389	4.01182	4.22255	5.11278	4.37282	4.63076	4.20844	3.63391	4.21436	3.99992	4.35407	4.44797	2.82187
LOC100576428	GB40219	3.65356	3.63301	3.40289	3.47063	4.37415	3.65661	4.1606	3.25178	3.91163	3.95605	3.97273	4.44723	3.24932	3.93632	2.82187
LOC100576430	#N/A	5.64921	5.63963	6.49678	5.56239	5.84305	4.70109	6.14244	5.92502	6.18334	5.70828	5.7901	5.30186	6.17441	6.00783	5.09416
LOC100576432	GB50229	8.05085	7.94973	7.76378	7.19103	7.50293	7.34254	7.8588	7.17722	7.78448	7.72585	7.17819	7.18819	7.37856	7.44761	6.92042
LOC100576433	GB52456	7.95571	7.99805	7.91053	8.10694	7.97048	8.10433	8.19305	7.92429	8.2093	8.01832	7.90586	7.85483	8.0171	8.32641	6.92042
LOC100576434	GB41317	4.48382	4.26187	4.84156	3.73194	3.94466	3.30825	3.78484	3.85651	4.07096	4.12114	3.64614	3.31389	3.76433	3.61945	5.81283
LOC100576435	GB47498	7.60181	7.38877	7.92442	7.50633	7.20064	6.11689	7.19174	6.95185	7.72797	7.54199	7.36657	7.64915	7.27732	5.73064	9.58099
LOC100576436	GB47177	9.8779	9.92102	9.9021	9.55325	9.54537	9.49004	10.2969	9.74037	10.2779	9.89549	9.43906	8.95809	9.71004	10.647	7.96709
LOC100576438	GB46987	5.76254	5.99643	5.06936	6.60345	6.37311	6.51539	5.64144	6.43135	6.12566	5.85151	6.59441	6.6678	6.62455	5.84818	5.09416
LOC100576439	GB45581	6.2535	6.19219	5.90213	6.27569	6.01583	7.01077	6.51147	6.58269	6.35606	6.22504	6.8762	6.53123	6.56832	6.97368	2.82187
LOC100576445	#N/A	3.30644	3.29426	2.82187	3.28253	3.33407	3.30825	3.78484	3.25178	3.71846	3.48776	3.40863	2.82187	3.66773	3.93632	2.82187
LOC100576446	GB46516	7.96505	7.76404	8.05005	7.47123	8.20004	6.73009	7.56671	6.62977	7.94594	7.2091	7.62708	7.31424	7.49834	7.2086	9.31513
LOC100576447	GB49281	4.29641	4.44565	4.48338	4.01182	4.97574	3.89004	4.236	4.2	4.38654	4.44732	4.41132	3.902	4.5809	3.61945	2.82187
LOC100576449	GB52328	7.08067	6.67781	6.85803	6.80537	6.77021	6.5282	6.81487	6.62048	7.07713	6.98232	6.96818	7.12075	6.80556	6.93487	5.81283
LOC100576451	#N/A	5.94589	5.78939	5.84407	5.93808	6.29187	4.15604	5.40541	4.94791	6.11087	5.92721	5.98079	6.10968	6.28359	4.80033	7.69504
LOC100576452	#N/A	4.15136	4.38763	5.58412	4.29179	4.88571	3.89004	4.55158	4.85074	4.20844	4.19463	4.36521	4.38418	4.69891	3.61945	5.09416
LOC100576453	#N/A	3.88621	4.04072	3.63819	3.83535	3.54253	4.07505	3.78484	3.85651	3.91163	3.63391	3.90178	3.79229	3.66773	4.73746	2.82187
LOC100576454	GB51558	5.67262	5.44594	5.78349	4.90302	5.77233	5.30939	5.88413	4.85074	5.95371	5.87082	5.26048	5.6588	5.42597	5.42295	5.81283
LOC100576457	GB54387	8.10674	8.25458	8.0437	8.57429	7.82894	9.27637	8.52627	8.55389	8.44654	8.52431	8.14236	8.14051	8.23048	8.82315	7.15657
LOC100576458	GB40218	6.46699	6.17688	5.98496	6.14716	6.7461	4.23122	6.68278	5.92502	6.05009	6.31184	5.21347	5.062	5.16523	5.38409	6.92042
LOC100576460	GB47781	3.30644	3.48702	3.40289	3.61319	3.33407	2.82187	3.50899	3.25178	3.27554	2.82187	2.82187	2.82187	3.24932	2.82187	2.82187
LOC100576461	GB41658	7.31808	7.26485	5.84407	6.69786	7.83465	6.71897	6.53724	6.1235	6.91751	5.98143	7.31368	7.20456	7.36217	7.44761	6.63751
LOC100576462	GB51075	5.03322	5.28027	5.30798	5.07657	4.7889	4.65152	5.66533	5.25292	5.25598	5.09351	4.57945	4.72039	5.66308	5.12411	2.82187
LOC100576464	#N/A	8.72203	8.8114	8.41209	8.57153	8.73343	9.65448	9.1144	9.07258	8.89636	8.84134	9.34353	9.00549	9.48557	9.72716	5.09416
LOC100576467	GB49097	8.53733	8.47537	8.38223	8.64676	8.21324	8.56951	8.20509	8.44808	8.64766	8.17587	8.08362	8.12771	8.22446	8.15739	8.56672
LOC100576471	GB54528	7.32536	7.37552	6.82871	7.0553	7.43687	7.36405	7.37372	7.34411	7.31338	7.23141	7.32976	7.43012	6.74774	7.66044	6.28431
LOC100576472	GB51130	9.17622	9.11193	8.66859	9.2096	9.02795	9.21663	8.75641	8.88067	9.24041	8.7154	9.22416	9.32049	9.33585	9.02083	9.6209
LOC100576476	GB53105	3.98284	4.11976	4.30354	3.47063	3.70007	3.30825	3.50899	3.7696	3.71846	3.86146	3.64614	3.5144	3.92953	4.06067	2.82187
LOC100576478	GB40549	5.69565	5.66204	5.58412	5.2586	5.35183	4.96343	4.65744	5.06711	5.14095	5.79192	5.86654	5.96194	5.40423	5.63549	6.28431
LOC100576482	GB41451	9.13135	9.31098	9.07227	8.60426	8.94336	8.97283	9.45573	9.01553	9.53591	9.09503	8.78242	8.22306	8.9027	9.69858	8.08599
LOC100576483	#N/A	3.88621	4.32651	4.20153	4.16112	4.04604	4.07505	3.65958	4.0086	4.07096	3.86146	2.82187	3.66611	3.92953	4.06067	2.82187
LOC100576484	GB52004	5.20731	5.41969	6.40015	5.84859	6.07552	5.85549	5.73465	6.69318	5.43634	5.88987	5.5318	6.03774	5.40423	5.76097	5.81283
LOC100576487	GB54326	6.00204	5.86826	5.98496	5.67149	5.31862	6.23142	6.19213	5.86275	6.09592	5.90866	5.4738	5.27011	5.81758	6.45666	5.09416
LOC100576488	GB40228	7.34697	7.25039	8.11202	6.94007	8.9032	6.73009	7.17548	6.21317	7.43024	7.338	8.3946	8.47963	8.39233	5.87608	9.10606
LOC100576492	GB43287	5.23956	5.30933	5.43321	5.49253	5.72312	5.74892	5.43373	5.71162	5.69915	5.47407	5.30591	5.02391	5.50963	5.90343	2.82187
LOC100576493	#N/A	3.30644	3.48702	2.82187	2.82187	3.33407	3.65661	3.50899	2.82187	3.27554	3.48776	2.82187	3.31389	3.24932	3.93632	2.82187
LOC100576497	GB44344	6.68701	6.7721	6.84344	6.72799	6.59221	6.39456	6.70566	6.42066	6.89195	6.8248	6.77005	6.67959	6.88432	5.63549	7.69504
LOC100576498	GB43677	5.39017	5.25058	5.16998	4.70239	5.05995	5.65738	5.48867	4.67022	5.33623	5.3116	4.94971	4.72039	4.62151	5.38409	5.09416
LOC100576502	GB53698	8.36474	8.50302	8.1241	8.85142	8.42851	8.52887	8.0356	8.68609	8.07611	8.07688	8.37926	8.07534	8.18469	8.08853	7.35931
LOC100576503	#N/A	4.74243	4.65292	5.06936	4.46291	4.97574	5.14762	5.51534	4.74556	4.7603	5.3116	4.61804	5.09902	5.21654	5.63549	2.82187
LOC100576504	#N/A	6.49318	6.52959	6.16116	6.27569	6.0559	6.9264	6.34623	6.16263	5.93698	7.28924	6.99534	7.29907	7.21175	5.9566	6.92042
LOC100576506	GB52250	7.61966	7.82863	7.73255	8.01661	7.77652	8.98212	8.04008	8.4585	7.75179	8.14493	8.2017	8.22306	8.08848	8.15739	2.82187
LOC100576508	GB54791	6.53159	6.69931	6.23044	6.08607	6.46483	5.60924	6.62393	5.69377	6.83944	6.69145	6.42448	6.56979	6.18696	5.98244	5.09416
LOC100576512	GB50733	6.3854	6.11389	5.78349	6.16203	6.32492	6.23142	6.12548	5.87858	6.1974	5.96359	6.19659	6.94662	6.13606	6.69256	2.82187
LOC100576513	#N/A	3.50401	3.29426	3.63819	3.92777	3.70007	3.50654	3.65958	3.25178	3.91163	4.12114	3.23819	4.08885	3.4242	3.61945	2.82187
LOC100576514	GB50413	9.01489	9.23426	8.61398	9.46249	9.13815	9.5769	9.19508	9.63298	9.18731	9.1051	9.17024	8.76778	8.88373	9.38606	7.35931
LOC100576515	GB43822	6.45372	6.56518	6.25279	6.51394	6.0559	7.15774	6.56255	6.8681	5.92006	6.22504	5.93903	6.10968	6.37405	6.79735	5.09416
LOC100576517	GB41460	4.59393	4.74469	5.58412	5.39349	4.62813	4.23122	5.08389	4.63076	4.44018	5.39525	4.85898	5.3632	4.73587	3.79276	5.09416
LOC100576518	GB50988	3.77799	4.11976	4.30354	4.22842	3.94466	4.36766	4.37282	4.0086	4.27104	5.92721	4.41132	3.99992	4.30282	3.79276	2.82187
LOC100576519	#N/A	9.43645	9.47194	9.44621	9.71925	9.49042	9.39761	9.75765	9.45067	9.74713	9.68722	9.47797	9.72336	9.29047	9.74217	9.26564
LOC100576520	#N/A	2.82187	3.48702	2.82187	3.61319	3.33407	3.50654	2.82187	3.25178	2.82187	3.29479	3.53808	3.31389	3.4242	2.82187	2.82187
LOC100576522	GB41316	5.8874	5.61686	7.27119	4.93963	5.4159	3.50654	5.28584	4.7816	5.65868	5.12694	4.82725	5.062	4.80667	4.86023	6.63751
LOC100576526	GB40230	4.99547	5.09137	5.12062	4.61218	6.25803	3.50654	5.08389	4.14006	6.14031	5.49936	5.72578	5.47818	5.21654	4.27134	6.63751
LOC100576527	GB48230	8.1524	8.14573	8.06266	7.89839	8.02641	8.47395	8.41664	8.27909	8.24998	8.28987	8.10865	7.98831	8.21841	8.22846	8.19582
LOC100576528	GB43309	4.87518	4.78817	5.16998	5.39349	6.03601	4.43016	4.60566	4.41143	5.04765	6.08397	6.1487	6.43697	5.50963	3.61945	5.81283
LOC100576530	GB41657	5.57648	5.74822	5.58412	5.46843	5.31862	5.53374	5.46147	5.6388	5.55199	4.83217	4.85898	4.85934	5.13881	5.84818	2.82187
LOC100576531	GB51076	7.38924	7.27202	6.85803	7.04737	6.61904	6.99244	6.9833	6.98836	7.06194	6.87296	6.60328	6.16132	6.73928	7.29276	5.81283
LOC100576532	GB45186	6.67564	7.04792	6.58727	6.28927	6.47956	6.09974	6.81487	6.4733	6.63878	6.40683	6.1487	5.68278	6.36305	7.31306	5.09416
LOC100576534	#N/A	6.22244	6.23717	6.35959	6.10159	6.52285	6.16711	6.31672	5.98464	6.49877	6.17956	6.43447	6.43697	6.51971	6.30195	6.92042
LOC100576536	#N/A	4.15136	4.26187	5.54792	4.65811	3.83097	3.78146	4.37282	4.0086	4.33027	3.63391	3.82486	3.99992	3.85079	4.06067	2.82187
LOC100576537	GB47705	3.30644	2.82187	3.63819	3.28253	3.33407	2.82187	3.50899	3.42764	3.82045	3.48776	2.82187	3.31389	2.82187	2.82187	2.82187
LOC100576540	GB50363	12.3529	12.6798	15.6625	14.2405	15.2641	14.2599	14.4083	14.7436	13.5082	13.0374	13.472	14.935	13.9227	14.7763	16.266
LOC100576541	#N/A	3.65356	3.29426	4.08877	3.47063	3.33407	3.30825	3.31001	2.82187	3.46087	3.29479	3.74043	3.902	3.4242	3.61945	2.82187
LOC100576542	GB43538	6.17454	6.46821	5.98496	6.39353	6.13279	6.86726	6.67121	6.92196	6.14031	6.11655	6.18477	5.81857	5.92695	7.01146	2.82187
LOC100576543	GB52539	7.20428	7.22104	6.79878	7.28165	6.69662	8.36096	7.21579	7.42613	6.95088	7.28924	7.20168	7.33669	7.13019	7.68398	5.09416
LOC100576544	GB47576	8.4503	8.6086	8.59675	8.88288	8.65177	8.3716	8.33497	8.80922	8.62722	8.52431	8.32158	8.13199	8.33759	8.54345	6.63751
LOC100576546	#N/A	4.87518	5.02193	5.51074	3.61319	5.21382	3.65661	5.11974	4.88395	6.05009	5.3116	4.53959	4.08885	4.84064	5.38409	6.92042
LOC100576547	GB40842	9.88406	9.75342	9.14221	9.51218	9.02546	9.76892	9.59945	7.74004	9.79142	10.3312	9.93653	10.1026	9.77943	9.00224	11.2535
LOC100576549	#N/A	7.21998	7.38877	6.01152	6.71802	7.5523	7.1495	6.83574	6.85233	6.92592	6.29774	7.22479	7.45769	7.18093	7.85965	5.09416
LOC100576552	GB46640	6.54416	6.40407	8.32059	7.92455	7.86844	5.55937	7.1424	8.10431	6.49877	7.57721	6.36301	5.70635	5.95669	6.00783	10.0588
LOC100576554	GB51339	9.19617	9.22507	9.512	8.86048	9.35608	8.60302	9.7766	9.18505	9.46428	9.29493	8.81128	8.08861	9.13708	9.89778	7.15657
LOC100576557	GB45239	4.15136	3.48702	3.40289	3.61319	3.54253	2.82187	3.65958	3.25178	3.71846	3.75558	3.23819	3.5144	3.4242	2.82187	5.09416
LOC100576559	GB47843	7.3326	7.74871	7.86085	7.60134	7.35177	8.54464	7.87397	8.31394	7.77522	7.63407	7.42757	7.76396	7.59495	8.37058	7.35931
LOC100576562	GB41113	3.88621	3.75456	4.20153	3.61319	3.70007	3.65661	3.78484	3.93565	3.60138	3.48776	3.40863	2.82187	3.92953	3.38939	2.82187
LOC100576563	GB54356	8.95059	8.65315	9.88446	8.94167	9.3699	7.19024	8.38876	8.16602	9.15198	9.12703	8.90171	9.02632	8.64766	7.38191	11.6408
LOC100576564	#N/A	3.30644	3.29426	3.96189	2.82187	3.70007	3.30825	3.99103	2.82187	3.60138	3.29479	3.23819	3.66611	3.24932	3.93632	5.09416
LOC100576565	GB46387	6.26877	6.26639	6.43959	6.40604	6.03601	6.97388	6.0192	6.49383	6.08081	5.81206	6.37344	6.36561	6.21174	6.52813	5.09416
LOC100576568	GB46064	3.50401	3.29426	3.40289	3.28253	2.82187	2.82187	2.82187	3.25178	3.46087	3.63391	2.82187	2.82187	3.24932	2.82187	2.82187
LOC100576569	GB50065	7.27364	7.12128	7.33503	6.02221	7.34378	7.62976	8.58581	7.83511	8.14963	8.10529	7.40247	7.8392	7.35667	8.97071	8.48256
LOC100576571	GB52419	8.38921	8.35578	8.42679	8.20267	8.30653	8.62986	8.75914	8.46884	8.41111	8.4408	8.35594	8.1574	8.44248	8.73206	6.28431
LOC100576572	GB50967	8.59256	8.72795	8.59675	8.51529	8.58902	8.91822	8.89911	8.79696	8.79465	8.63141	8.53962	8.09301	8.51581	9.18094	7.69504
LOC100576584	GB48640	3.50401	3.75456	3.8153	3.73194	3.94466	3.50654	3.78484	3.93565	3.46087	3.75558	3.97273	3.79229	3.4242	3.61945	2.82187
LOC100576585	#N/A	5.47313	4.98578	5.21757	5.88508	5.72312	4.79468	5.25423	5.394	5.38721	5.22244	5.06161	4.56399	5.02756	4.5271	6.28431
LOC100576586	GB46523	9.2563	9.24884	9.23142	9.26009	9.24053	9.31548	9.26766	9.15814	9.34422	9.35359	9.28851	9.41128	9.3048	9.28202	9.45418
LOC100576590	#N/A	6.5061	6.46821	6.29648	6.63562	6.78211	7.06438	6.82534	6.77915	6.1974	6.59125	6.9886	6.59493	7.36766	7.11919	2.82187
LOC100576591	GB42275	5.69565	5.66204	5.78349	4.82653	5.28458	4.48946	5.94362	4.91632	6.00273	5.47407	5.21347	5.17011	5.40423	6.17374	2.82187
LOC100576592	GB50550	6.99193	7.38877	7.35569	7.37324	6.98103	8.50006	7.84347	8.0809	7.36375	7.47508	7.8061	7.41614	7.92723	8.22312	6.63751
LOC100576597	#N/A	7.93686	7.81888	8.26167	7.82157	8.17776	6.19963	8.05347	6.97386	8.32488	7.66714	7.60085	7.40909	7.3456	7.43841	9.26564
LOC100576599	#N/A	4.54014	4.38763	4.71045	4.40866	4.56952	4.65152	4.92983	4.81664	4.63324	4.83217	4.49836	4.38418	4.30282	5.17109	2.82187
LOC100576600	GB47820	7.78698	7.65316	7.36592	7.3541	7.53836	7.90373	7.8486	7.43144	7.74706	7.53603	7.70713	7.35147	7.83139	7.8177	7.53695
LOC100576602	#N/A	5.98357	6.23717	5.98496	5.5395	6.537	5.30939	6.19213	5.99915	6.46441	6.13257	6.47375	5.70635	6.16174	5.56822	7.15657
LOC100576603	#N/A	4.07062	3.86033	3.63819	3.47063	4.88571	3.89004	3.65958	3.56114	4.38654	2.82187	4.65544	4.44723	4.35407	3.79276	2.82187
LOC100576606	GB43277	7.40305	7.50286	7.24927	7.42918	7.26978	8.20302	7.52244	7.62904	7.49379	7.60592	7.75549	7.61896	8.00661	7.95303	6.28431
LOC100576608	GB41656	6.89732	7.19863	6.79878	7.28165	6.82876	7.50626	7.59752	7.50372	7.38828	7.52405	7.1841	7.22075	6.93699	7.76716	5.09416
LOC100576609	#N/A	6.28389	5.94292	6.27481	6.79592	6.537	5.74892	6.27127	6.01352	6.38086	6.36689	6.28777	6.51814	6.18696	6.36195	5.09416
LOC100576610	#N/A	9.10627	9.10794	9.3823	9.13879	9.0354	9.25928	9.25034	9.14208	9.37058	9.093	8.70458	8.48966	8.71147	9.56562	6.92042
LOC100576612	GB43320	7.04583	7.24311	7.74042	7.16196	7.37548	7.14121	7.1998	7.34411	7.12905	6.47099	6.60328	6.22737	6.84549	7.13068	6.28431
LOC100576614	GB41191	6.15821	6.46821	6.85803	6.40604	6.16972	6.21561	6.68278	6.75389	6.59714	6.39364	6.07368	5.92245	6.2361	6.69256	5.81283
LOC100576615	GB43640	8.20455	8.22905	8.01803	8.2309	8.05113	8.34304	8.13547	8.51698	7.9335	8.36898	8.46167	8.12342	8.43989	8.24438	7.53695
LOC100576617	#N/A	3.30644	2.82187	3.63819	3.61319	3.33407	2.82187	3.31001	3.25178	3.46087	3.29479	2.82187	2.82187	3.24932	3.38939	2.82187
LOC100576618	GB51853	2.82187	2.82187	3.40289	3.61319	2.82187	3.50654	2.82187	3.25178	2.82187	3.29479	3.64614	3.66611	3.4242	2.82187	2.82187
LOC100576619	GB49383	6.9642	6.99684	6.11302	6.90537	7.66557	7.08181	6.76131	6.44195	6.41727	5.99904	6.89074	7.29143	6.83759	6.9217	5.09416
LOC100576620	GB46131	9.56625	9.67053	10.0391	9.24115	9.55057	8.32124	9.67207	9.13073	9.93341	9.63809	9.1372	9.04459	9.26136	9.15593	11.6696
LOC100576621	GB53539	6.5061	6.87006	6.73697	6.78641	6.43491	7.38525	6.75035	7.28084	6.76627	7.11626	6.8762	6.36561	6.89957	7.2086	6.28431
LOC100576623	#N/A	6.95483	6.95284	6.31783	7.27488	7.06128	6.67361	7.50954	6.50398	6.75686	7.28924	6.57649	7.53088	7.41608	7.03611	5.81283
LOC100576625	GB50551	7.55927	7.67495	7.62608	7.52356	7.54535	7.29105	7.71454	7.05182	7.69395	7.68339	7.35615	7.12936	7.5714	7.86652	5.81283
LOC100576626	#N/A	6.59339	5.96099	6.23044	6.00578	6.91774	5.36903	5.43373	5.50134	6.34349	6.76479	6.04776	6.47813	6.61533	4.86023	8.72161
LOC100576628	#N/A	5.20731	5.36563	4.7777	4.61218	5.13911	4.30153	5.34694	4.88395	5.52962	4.5555	4.41132	4.31746	4.53888	4.44797	2.82187
LOC100576631	#N/A	2.82187	3.29426	2.82187	3.28253	2.82187	3.50654	2.82187	2.82187	3.82045	2.82187	3.23819	2.82187	3.4242	3.61945	2.82187
LOC100576637	#N/A	2.82187	3.29426	3.40289	3.73194	2.82187	3.30825	2.82187	2.82187	3.27554	3.75558	3.23819	3.5144	3.66773	2.82187	5.09416
LOC100576638	GB55803	6.48015	6.39088	6.42001	6.00578	6.32492	5.077	6.58742	6.1235	6.67923	5.79192	5.37132	5.09902	5.7847	6.2393	7.35931
LOC100576640	GB42764	6.91675	7.04792	7.70867	7.44132	7.39108	7.15774	7.26271	7.4101	7.34507	7.11626	7.69065	7.70195	7.66783	6.85395	7.69504
LOC100576641	GB46781	3.98284	4.11976	4.48338	4.22842	4.30093	4.48946	4.1606	4.85074	4.07096	4.38924	4.21436	4.50704	5.05627	4.17125	2.82187
LOC100576645	GB41837	6.73162	6.96175	6.58727	6.50235	6.27505	6.77371	6.82534	6.4836	6.5651	6.45839	6.29876	6.21115	6.26004	7.09594	2.82187
LOC100576646	GB44983	10.2329	10.263	10.3414	10.7413	10.4309	10.3755	10.1479	10.7599	10.1734	10.1677	10.2323	9.96907	9.99985	10.1224	9.87305
LOC100576647	GB44898	7.40991	7.22844	7.27119	6.78641	6.60569	6.89714	7.02021	7.0027	7.05429	6.76479	6.34192	6.3509	6.82167	7.06034	6.28431
LOC100576649	GB55893	8.65154	8.51816	8.64364	8.82159	8.43979	9.15019	8.84884	9.09779	8.78315	8.64253	8.5782	8.59259	8.71792	9.2456	5.81283
LOC100576650	#N/A	7.9416	7.88112	8.06892	7.75508	7.67833	6.09974	7.33766	6.4733	7.49379	7.15568	6.5492	7.49807	6.71361	6.76818	8.08599
LOC100576657	#N/A	6.58124	6.64495	6.27481	7.22656	7.35972	6.39456	7.68042	7.35532	7.23436	7.41143	7.24754	6.69129	7.20564	7.18676	6.28431
LOC100576660	GB43081	8.96461	9.02774	9.15109	8.76483	8.84786	8.14214	9.08213	8.85725	9.10472	8.75435	8.43225	7.81278	8.57143	9.04828	8.19582
LOC100576661	GB53554	7.49623	7.50286	7.11019	6.68767	6.18783	6.21561	6.80431	6.30915	6.81244	7.08393	7.02857	6.74837	7.30617	7.28251	7.35931
LOC100576662	GB49261	4.36235	4.94861	3.96189	3.73194	3.54253	4.23122	4.60566	4.0086	3.99458	4.5555	4.03877	3.99992	4.19261	4.27134	5.81283
LOC100576663	GB41130	8.91492	8.82607	8.64364	9.28889	8.70879	9.29326	8.69513	9.03828	8.81963	8.67537	8.56696	8.78146	8.61351	8.7874	7.15657
LOC100576666	GB41494	9.34115	9.21396	9.22302	8.92233	8.73343	8.74349	8.76999	7.76545	8.59074	9.21156	9.05273	9.05589	8.99401	8.95468	9.7344
LOC100576667	GB44689	9.33935	9.25789	9.35438	9.14065	9.18579	9.65011	9.35848	9.37709	9.20981	9.33487	9.28987	9.25533	9.27016	9.40977	8.86146
LOC100576669	GB45451	8.31452	8.38249	8.39723	7.97549	8.23929	7.87408	8.67508	8.3168	8.47827	8.20991	7.57413	7.29143	8.03097	8.7765	6.92042
LOC100576671	GB48262	7.58978	7.61421	7.65136	7.16928	7.71594	7.53814	7.27802	7.25113	7.51064	7.51802	7.44734	8.02559	7.35667	7.92037	8.39317
LOC100576677	GB55788	5.10562	5.33777	5.21757	5.31418	5.21382	5.97351	5.68882	5.69377	5.412	5.34006	5.74214	5.13504	5.48919	5.73064	2.82187
LOC100576679	#N/A	4.42467	4.94861	3.63819	4.29179	5.53568	4.48946	4.07936	3.93565	4.27104	3.86146	4.61804	4.50704	4.5809	5.21647	2.82187
LOC100576683	GB44536	8.09403	8.1993	7.88945	7.42918	8.73953	7.27599	8.11434	7.46803	8.6143	7.90743	7.75152	8.1532	7.8074	8.05883	9.93768
LOC100576686	GB53507	5.27105	5.82938	5.78349	5.41893	5.4159	3.89004	4.43549	4.74556	4.83838	4.91236	4.36521	4.56399	4.49533	4.67126	6.28431
LOC100576687	GB44265	5.14039	5.36563	4.56389	4.97523	5.21382	5.00239	5.22185	4.50407	5.22814	4.60614	4.88993	4.94423	4.69891	5.60227	5.09416
LOC100576688	GB43534	3.88621	4.74469	4.48338	4.35173	4.37415	4.23122	4.55158	4.67022	4.44018	4.38924	4.26697	3.66611	4.06966	4.27134	2.82187
LOC100576690	#N/A	3.88621	3.63301	4.08877	3.73194	3.94466	3.89004	4.236	3.25178	3.99458	3.86146	3.90178	3.79229	3.76433	4.17125	2.82187
LOC100576696	GB42361	3.50401	3.63301	4.39697	3.83535	3.83097	3.78146	4.1606	4.2	3.60138	4.12114	4.49836	4.38418	4.13295	3.79276	5.09416
LOC100576697	#N/A	2.82187	2.82187	2.82187	3.28253	4.13804	3.78146	3.50899	3.25178	2.82187	3.95605	3.64614	3.5144	3.4242	2.82187	5.09416
LOC100576699	#N/A	3.65356	4.11976	4.08877	4.16112	4.44295	4.36766	4.55158	4.70846	4.5878	4.44732	4.41132	4.08885	4.49533	4.80033	2.82187
LOC100576700	GB47718	8.19665	8.1993	8.59675	7.30177	7.79421	7.00164	8.95483	8.13062	8.41409	9.5464	8.42977	8.89405	7.89346	8.02851	11.0493
LOC100576702	#N/A	4.48382	4.44565	4.63936	3.47063	3.70007	2.82187	2.82187	3.25178	4.20844	4.32807	3.90178	4.44723	3.55697	4.17125	2.82187
LOC100576703	GB41495	10.5713	10.51	11.3316	10.86	10.9541	10.3604	10.5116	10.9655	10.8658	10.9567	10.6343	10.9074	10.7306	10.4835	12.4174
LOC100576705	GB52096	3.50401	3.48702	2.82187	3.47063	3.54253	3.50654	3.31001	2.82187	3.46087	3.29479	2.82187	3.31389	3.55697	4.17125	2.82187
LOC100576706	GB55626	7.48328	7.31432	7.28203	7.24053	7.16478	7.36405	7.57911	7.35532	7.65911	7.46258	7.10533	6.9071	7.32883	7.68398	5.09416
LOC100576708	GB53972	8.33626	8.61143	8.29944	8.55768	8.28586	9.19282	8.8641	8.88647	8.74097	8.59182	8.6092	8.42836	8.79916	9.17818	6.92042
LOC100576709	GB54320	10.0717	9.99642	9.31015	10.1423	10.0135	8.92063	9.06462	8.85331	10.277	9.723	10.2057	10.4547	10.0611	8.47767	11.3752
LOC100576717	GB45266	7.32536	7.48447	7.60898	7.93317	7.5933	9.27069	8.21703	7.96141	7.35755	7.81213	8.34018	8.53883	8.5084	8.12337	5.09416
LOC100576718	#N/A	5.67262	5.90609	7.00936	6.28927	6.18783	5.91574	7.58527	7.55808	6.3931	7.583	6.97502	7.62505	6.00015	7.45676	8.19582
LOC100576719	GB42364	9.68109	9.82695	9.77195	9.71426	9.64611	9.9737	10.1583	9.87767	10.0251	9.88734	9.59983	9.32237	9.82987	10.4113	8.79323
LOC100576722	GB54750	10.1361	10.2413	10.7506	10.1924	10.713	9.84979	10.1004	9.85123	10.2004	9.80194	9.98545	9.86756	10.3102	10.5264	10.3475
LOC100576723	GB43533	3.50401	3.48702	3.63819	2.82187	3.54253	2.82187	3.65958	2.82187	3.46087	3.75558	3.23819	3.31389	3.24932	3.79276	2.82187
LOC100576726	#N/A	5.84701	5.63963	6.23044	6.96555	6.43491	5.72659	6.12548	6.59223	5.92006	6.31184	6.67234	6.69129	5.83374	5.66794	7.15657
LOC100576729	#N/A	3.77799	3.75456	3.40289	3.47063	3.33407	2.82187	3.50899	3.25178	3.91163	3.48776	3.53808	3.66611	3.55697	2.82187	2.82187
LOC100576730	GB46409	6.19069	6.39088	6.1373	6.51394	6.20571	6.80558	6.6359	6.17543	6.23876	6.28349	6.41442	6.40886	6.26004	6.21778	2.82187
LOC100576732	#N/A	5.7406	5.57015	5.39273	5.31418	5.24966	4.92327	5.54149	5.17643	5.46027	4.74659	5.11418	5.27011	4.87373	5.73064	5.09416
LOC100576733	GB46320	6.54416	6.08132	6.11302	6.44292	6.37311	7.39921	6.82534	6.70201	6.03448	6.25457	6.77789	7.00393	6.72222	6.81171	6.28431
LOC100576734	GB49018	3.50401	3.48702	3.63819	3.61319	3.83097	3.50654	3.31001	3.6725	3.71846	3.63391	3.40863	3.31389	3.85079	3.61945	2.82187
LOC100576735	GB53082	7.36826	7.41492	7.44517	7.42307	7.22696	7.61787	7.46345	7.96872	8.12067	7.36514	7.41758	6.77058	6.99489	8.20696	5.81283
LOC100576736	GB51346	6.76419	6.69931	6.56963	6.47888	5.74794	6.57834	6.14244	6.38812	6.60766	6.99976	7.00205	6.63183	5.89656	6.21778	5.09416
LOC100576737	GB46946	4.64544	4.55375	4.39697	4.29179	3.70007	4.92327	4.55158	4.25676	4.7603	4.38924	4.36521	4.50704	4.19261	4.60131	2.82187
LOC100576738	GB42262	3.77799	3.48702	3.8153	3.61319	3.33407	3.98699	3.65958	3.93565	3.46087	4.26337	3.82486	4.17062	3.55697	3.79276	2.82187
LOC100576741	GB42456	3.88621	3.86033	2.82187	3.28253	2.82187	3.30825	3.50899	3.25178	3.27554	3.48776	3.53808	2.82187	3.4242	4.06067	2.82187
LOC100576742	GB44982	10.3426	10.1827	9.96553	9.46398	9.82151	7.37822	9.43543	9.12583	10.6681	9.99748	7.60085	7.5047	8.0785	9.1671	10.9588
LOC100576744	GB45295	7.79747	7.83349	7.69253	7.52925	7.58655	7.4199	7.76425	7.54346	7.54377	7.38516	7.21905	7.15487	7.36217	8.04678	5.09416
LOC100576745	GB44192	5.8874	5.96099	7.33503	6.43073	6.96024	4.23122	5.28584	5.45941	6.11087	6.47099	5.77429	6.24341	7.02299	4.06067	8.39317
LOC100576746	GB41967	4.83245	4.44565	5.12062	4.93963	5.4159	5.33953	5.82202	5.41615	5.07949	5.15954	5.56915	6.07417	5.24148	6.10501	5.81283
LOC100576747	GB53973	7.60778	7.64214	7.03524	7.75508	7.75861	8.08721	7.33766	7.24512	7.53281	7.39177	8.42479	7.94518	8.54751	7.57904	5.09416
LOC100576748	GB47116	13.5073	13.612	10.696	12.1937	11.424	13.6353	13.6205	8.54902	13.6521	13.9061	12.5069	12.784	11.5748	12.8647	12.6995
LOC100576750	GB51136	3.88621	3.95483	2.82187	3.47063	4.04604	3.89004	3.31001	4.0086	3.71846	3.86146	3.74043	3.31389	3.85079	2.82187	2.82187
LOC100576752	#N/A	3.77799	3.29426	2.82187	3.47063	2.82187	3.30825	3.50899	3.25178	2.82187	3.48776	2.82187	2.82187	3.24932	2.82187	2.82187
LOC100576754	GB52592	9.00814	9.1179	9.07849	9.12006	8.9565	9.57996	9.19709	9.19443	9.088	9.0726	9.18207	8.91654	9.18592	9.26912	5.81283
LOC100576755	#N/A	2.82187	3.63301	3.40289	3.28253	4.04604	3.30825	2.82187	3.25178	3.27554	3.29479	3.40863	2.82187	3.24932	2.82187	2.82187
LOC100576759	GB48681	8.33266	8.52716	8.47001	8.76965	8.2983	9.87494	9.01077	9.16452	8.30249	8.90272	9.08459	9.16219	9.16249	9.37406	7.15657
LOC100576760	GB51753	6.78549	6.84137	7.00936	6.7575	6.94973	7.84889	7.20782	7.0027	7.0154	7.24608	7.80992	7.68456	7.48327	6.79735	6.63751
LOC100576761	GB43237	7.09778	7.07279	7.15806	6.70797	6.84019	7.43353	7.52244	7.25113	7.14355	7.11626	7.03513	6.59493	7.11069	7.26178	6.63751
LOC100576762	GB42197	3.65356	3.95483	3.8153	4.01182	3.94466	4.07505	3.65958	3.93565	4.14197	4.44732	3.97273	4.17062	3.85079	4.17125	2.82187
LOC100576765	GB53151	6.95483	7.15272	6.65575	6.69786	6.52285	7.87906	7.08261	7.20228	6.84832	7.23141	7.02199	7.23676	7.01602	7.58739	5.09416
LOC100576767	#N/A	4.29641	4.65292	3.8153	3.61319	4.56952	4.07505	4.30651	4.0086	3.99458	4.50264	4.53959	4.31746	4.49533	4.86023	2.82187
LOC100576768	GB51496	7.04583	7.18349	6.99625	7.11721	6.81724	7.51269	7.27038	7.28671	7.27441	7.15568	7.47168	6.95633	7.06414	7.49277	7.15657
LOC100576770	GB48965	7.3398	7.28626	7.53847	7.89839	7.53836	7.94235	7.53523	8.10431	7.40039	7.18645	7.69891	7.8181	7.38938	8.19063	2.82187
LOC100576772	#N/A	3.30644	2.82187	3.40289	3.83535	3.33407	3.50654	3.50899	3.42764	3.46087	3.48776	3.74043	3.31389	3.92953	3.38939	2.82187
LOC100576773	GB44981	5.33192	5.28027	6.33886	6.00578	6.11396	5.077	5.75701	6.46293	5.69915	5.92721	5.62335	5.27011	5.73387	5.69964	7.35931
LOC100576774	GB51983	8.62235	8.69903	8.49348	8.66497	8.61246	8.74076	9.00619	8.75532	8.93429	8.76456	8.59378	8.3125	8.73919	9.32005	7.15657
LOC100576775	GB47105	8.1483	8.24733	8.25619	8.25857	8.20004	8.88641	8.76728	8.59696	8.57482	8.51223	8.44703	7.97407	8.52809	8.94498	6.92042
LOC100576778	#N/A	4.07062	3.95483	3.63819	3.61319	3.33407	3.78146	3.65958	4.0086	3.82045	3.29479	3.90178	3.99992	3.76433	3.61945	2.82187
LOC100576781	GB46364	6.31364	6.4429	5.65381	5.79202	5.97459	6.04702	6.54995	5.86275	6.16914	5.70828	5.75831	5.92245	5.68112	6.66115	2.82187
LOC100576783	GB52408	2.82187	3.48702	3.40289	2.82187	2.82187	3.50654	3.50899	3.25178	2.82187	2.82187	3.40863	2.82187	3.4242	3.38939	5.09416
LOC100576784	GB44345	6.62922	6.851	6.72109	6.80537	6.25803	6.93602	6.70566	6.91439	6.72824	6.28349	6.4834	6.30583	6.70495	6.86776	7.15657
LOC100576789	GB47720	6.42678	6.40407	6.67236	6.45501	6.61904	6.90696	6.79368	6.92949	6.79415	6.90109	6.95441	6.5442	6.95898	7.18676	5.09416
LOC100576791	#N/A	4.91653	4.60434	5.21757	5.10869	5.10012	4.15604	4.75491	4.14006	5.14095	5.77147	5.4934	5.17011	5.21654	3.38939	7.15657
LOC100576792	GB48618	6.74256	6.70994	6.72109	7.19821	6.29187	7.38525	7.31558	6.81214	6.95088	7.26061	7.06106	7.17162	7.21175	7.50163	5.81283
LOC100576794	GB44692	7.9416	7.95864	8.05005	7.60134	7.74655	8.0166	8.18496	8.03289	8.18503	7.94385	7.71937	7.48474	7.67668	8.66665	8.48256
LOC100576795	GB48855	7.96039	7.92722	7.87522	8.09163	7.94959	8.80237	8.42353	8.47655	7.98262	8.36227	8.30002	8.38241	8.48088	8.53053	7.35931
LOC100576796	GB55435	4.48382	4.74469	4.84156	4.51477	4.7889	4.88182	4.80094	4.50407	4.49145	4.87289	4.61804	5.062	4.77177	4.44797	5.81283
LOC100576797	GB42218	3.65356	3.63301	4.48338	4.01182	3.70007	3.78146	3.50899	4.25676	3.46087	3.86146	3.97273	3.902	3.85079	3.38939	2.82187
LOC100576799	GB53262	8.42685	8.41843	8.54379	8.95018	8.55832	9.08917	8.20908	8.85528	8.27319	8.39879	8.7148	8.68576	8.68979	8.46866	8.08599
LOC100576801	GB41123	5.98357	5.7058	6.06319	5.75299	5.7963	5.87586	6.28658	5.6388	5.97024	5.64209	5.69247	5.6588	5.76796	6.2393	2.82187
LOC100576803	GB42282	5.10562	5.36563	5.26354	5.49253	5.21382	5.65738	5.25423	4.85074	5.412	5.57257	4.82725	5.4219	5.46844	4.97226	5.81283
LOC100576805	GB52767	7.6373	7.61421	7.54748	7.42918	8.10407	7.30595	8.79675	7.66999	8.18852	9.16028	8.98511	8.87631	8.05153	8.33138	9.6209
LOC100576809	GB46524	5.39017	5.15735	5.21757	5.28668	5.86584	3.65661	4.65744	4.31072	5.59566	5.6193	5.21347	5.6588	5.69893	3.61945	7.83748
LOC100576811	GB53844	3.77799	3.29426	2.82187	2.82187	3.70007	3.30825	2.82187	2.82187	3.60138	3.63391	3.23819	2.82187	2.82187	2.82187	2.82187
LOC100576812	GB49690	7.78698	7.98067	7.83903	7.90716	7.87952	8.90118	8.1563	8.32537	8.10966	8.14493	8.30273	8.22707	8.24245	8.40873	6.92042
LOC100576814	#N/A	7.1314	6.70994	7.95855	7.21953	7.75259	5.77089	6.86649	7.28671	7.51622	7.68877	7.03513	7.70195	7.05055	5.17109	9.4093
LOC100576816	GB52407	3.30644	2.82187	3.63819	3.28253	2.82187	3.65661	3.89378	3.56114	2.82187	2.82187	2.82187	3.99992	3.4242	2.82187	2.82187
LOC100576817	GB44535	6.02027	5.80953	5.75218	6.61425	6.37311	6.85717	6.20832	6.28575	5.59566	6.05061	6.67234	6.77058	6.58731	6.21778	6.28431
LOC100576818	GB55419	7.71131	7.65316	7.70867	7.62281	7.65915	8.12546	7.82797	7.7528	7.649	7.72061	7.66556	7.49807	7.66338	7.90041	5.81283
LOC100576819	GB54764	7.24322	7.25764	7.16978	7.1546	7.09979	7.82842	7.47013	7.38844	7.43613	7.41793	7.36657	7.42315	7.46804	7.5622	2.82187
LOC100576820	GB47721	3.77799	3.63301	3.96189	4.01182	3.54253	3.98699	3.78484	4.14006	4.14197	3.86146	3.90178	3.66611	3.4242	3.93632	2.82187
LOC100576825	#N/A	4.07062	3.95483	4.56389	4.01182	4.04604	3.98699	3.99103	4.63076	3.71846	4.60614	4.41132	4.17062	3.92953	3.93632	2.82187
LOC100576826	GB44424	9.18023	9.13174	8.59241	8.79585	8.40186	9.34638	8.68084	8.2908	8.81512	9.2484	9.02508	9.1538	8.9027	8.28598	8.92661
LOC100576828	GB40047	5.06992	4.55375	5.30798	4.51477	5.5067	4.23122	5.40541	4.67022	5.412	4.70152	4.49836	4.67043	4.5809	5.46073	5.09416
LOC100576829	GB52247	8.90768	9.06325	8.98228	8.92017	9.03787	8.94697	9.05799	8.89225	9.16798	8.96603	8.8819	8.6324	8.99224	9.21632	9.58099
LOC100576830	#N/A	4.15136	4.32651	3.96189	3.61319	4.22255	3.78146	3.78484	3.56114	4.14197	3.48776	3.97273	4.08885	4.06966	3.61945	5.09416
LOC100576831	GB41120	3.77799	3.63301	3.40289	3.47063	3.33407	3.65661	3.31001	3.6725	3.27554	3.29479	3.40863	3.79229	3.4242	3.79276	2.82187
LOC100576833	GB42258	2.82187	2.82187	2.82187	2.82187	2.82187	3.50654	3.50899	3.25178	2.82187	2.82187	3.23819	3.31389	3.55697	3.61945	2.82187
LOC100576835	#N/A	5.33192	5.54619	5.54792	4.82653	5.31862	4.23122	5.46147	4.94791	5.28327	5.12694	4.94971	4.38418	5.11187	5.26036	5.09416
LOC100576836	GB41518	4.69488	4.69965	4.71045	4.29179	4.83822	5.27855	4.80094	5.27748	4.8757	5.22244	4.65544	4.90249	4.87373	5.42295	2.82187
LOC100576837	GB48779	3.65356	3.86033	3.96189	4.22842	4.04604	3.78146	3.65958	3.93565	3.82045	3.63391	3.53808	3.5144	3.76433	3.38939	2.82187
LOC100576838	GB45336	4.78824	4.94861	4.30354	3.83535	4.7889	3.98699	3.78484	4.41143	4.27104	4.12114	4.15906	4.31746	4.2491	5.02485	2.82187
LOC100576839	GB40201	3.30644	3.29426	3.63819	2.82187	3.54253	2.82187	3.50899	2.82187	3.27554	3.29479	3.40863	3.5144	3.55697	3.38939	2.82187
LOC100576840	#N/A	3.98284	4.65292	4.30354	4.78649	4.83822	4.48946	4.37282	4.97874	4.54059	4.32807	4.36521	4.08885	4.4031	4.36308	5.09416
LOC100576841	#N/A	7.91775	8.02797	8.72914	8.39576	7.66557	9.503	8.00836	8.64564	7.36375	8.14493	8.91063	9.35017	9.07487	7.27218	7.69504
LOC100576843	GB47770	5.71831	5.54619	5.58412	5.69232	5.74794	5.21468	6.25579	5.61998	5.75774	5.70828	5.77429	6.05607	5.7847	5.84818	7.83748
LOC100576847	GB55597	3.65356	3.29426	3.63819	3.47063	3.33407	4.07505	3.65958	4.0086	3.82045	4.12114	3.74043	3.66611	3.24932	3.93632	2.82187
LOC100576848	GB47847	7.55927	7.40843	7.4355	7.60134	7.74048	8.31757	7.91366	8.07074	7.39435	7.41793	7.68233	7.63715	7.76652	8.07078	7.35931
LOC100576850	GB49633	7.64313	7.38216	7.49258	7.70564	7.51721	8.02111	7.69189	8.00472	7.58148	7.73107	7.77125	7.6067	7.62729	7.6525	6.92042
LOC100576851	#N/A	11.5355	11.4621	11.3928	11.9696	11.5262	12.4479	11.6639	12.0218	11.5194	11.6659	11.7424	12.0499	11.6767	11.6865	9.77033
LOC100576852	#N/A	6.58124	6.86056	7.0732	6.61425	6.60569	6.24705	7.47013	6.94443	7.39435	7.43723	6.64683	6.47813	6.7645	7.45676	6.63751
LOC100576853	#N/A	7.24322	7.15272	7.68439	7.0553	8.03139	7.01984	7.57911	7.48344	7.71349	7.53005	7.51916	6.86647	7.62729	7.36257	7.15657
LOC100576855	GB50138	7.73879	7.80907	7.39615	7.10198	7.26132	7.53814	8.00377	7.81091	7.70376	7.95281	7.28099	6.70289	7.34003	8.17964	5.09416
LOC100576859	GB44425	6.55663	6.67781	6.01152	5.98916	5.86584	6.56597	6.36075	5.74665	6.01869	6.14841	6.02135	6.22737	6.30675	7.04828	5.09416
LOC100576860	GB41060	3.65356	3.75456	4.08877	3.47063	3.54253	3.50654	3.78484	4.2	3.91163	4.19463	3.64614	3.902	4.06966	3.93632	5.81283
LOC100576862	GB52245	8.25489	8.29381	8.39225	8.56601	8.70879	9.24198	8.89416	9.02432	8.82637	8.65356	8.75694	8.67992	8.81527	9.31252	6.63751
LOC100576863	GB40340	4.91653	5.25058	4.7777	4.90302	5.10012	6.24705	5.61712	5.27748	5.38721	5.25282	5.23718	5.23759	5.68112	6.05725	2.82187
LOC100576864	GB54019	7.85887	7.80907	8.03733	7.88068	7.77652	7.77057	8.2829	7.92805	8.27319	8.09318	7.81753	7.29907	7.86663	8.17411	7.96709
LOC100576866	GB51508	8.47989	8.30432	8.417	8.42658	8.32692	7.7652	8.16043	8.15325	8.39003	8.41833	8.08046	8.21502	8.19704	7.78179	8.39317
LOC100576868	#N/A	4.48382	4.32651	3.96189	3.61319	4.04604	2.82187	3.99103	4.07647	4.27104	4.44732	4.45565	4.08885	4.13295	3.61945	5.81283
LOC100576871	GB45872	7.66621	7.46583	7.3454	7.16928	7.23563	7.5507	7.56671	7.32713	7.51064	7.28924	7.30829	6.87673	7.59961	7.72995	6.63751
LOC100576872	GB46122	6.64097	6.72049	6.27481	6.28927	6.50857	6.98319	6.5997	6.4733	6.70884	6.41989	6.47375	6.64392	6.64281	7.40099	2.82187
LOC100576876	#N/A	9.0613	9.10192	9.29154	9.23941	9.36004	9.40453	9.19709	9.97246	9.01122	9.01175	9.02836	9.1538	9.51915	9.30495	10.2744
LOC100576878	GB47940	10.8055	10.8261	11.0027	10.6225	10.6464	10.1302	10.9215	10.3818	10.9199	10.7083	10.4037	10.6897	10.7055	10.2952	12.1299
LOC100576880	GB41833	4.42467	4.11976	4.30354	4.22842	4.44295	4.23122	4.30651	3.93565	4.67706	4.26337	4.69174	3.31389	4.49533	3.61945	2.82187
LOC100576881	GB52405	4.29641	4.19318	4.39697	3.73194	4.44295	4.30153	4.92983	4.07647	3.91163	4.19463	3.53808	4.85934	3.85079	4.36308	2.82187
LOC100576882	GB50954	7.79747	7.75384	7.41596	6.70797	8.30653	8.21883	9.24257	7.85497	8.78776	9.64225	8.92302	9.10459	8.2661	9.30242	9.6209
LOC100576884	#N/A	3.50401	2.82187	3.40289	2.82187	2.82187	3.50654	2.82187	3.25178	3.27554	2.82187	3.40863	2.82187	2.82187	3.79276	2.82187
LOC100576885	#N/A	7.20428	7.1053	6.76821	6.79592	6.81724	7.62383	7.50305	7.30417	7.39435	7.28924	7.36657	6.97556	7.43709	8.05282	6.28431
LOC100576886	GB52528	3.50401	3.86033	4.63936	3.92777	3.54253	5.79253	4.37282	3.7696	3.60138	4.19463	4.10068	3.31389	5.19113	3.79276	2.82187
LOC100576888	#N/A	4.22632	4.78817	5.6194	5.07657	5.77233	5.42616	3.99103	4.74556	3.99458	6.03363	4.69174	5.53225	6.47959	5.17109	2.82187
LOC100576894	GB44191	7.28114	7.32815	6.90091	7.30842	7.21824	6.69647	7.23944	6.83639	7.53281	7.46884	7.21328	7.07694	6.91465	6.49284	8.56672
LOC100576895	GB53524	6.02027	5.74822	6.33886	5.31418	5.21382	4.79468	5.66533	5.03831	6.23876	6.33963	5.45391	5.68278	5.83374	4.80033	7.53695
LOC100576896	GB52248	5.60115	5.66204	5.93029	5.95531	6.46483	5.72659	5.71193	5.6009	5.65868	6.35333	6.42448	6.84571	6.14896	5.21647	7.15657
LOC100576898	GB53069	8.14009	8.27966	8.45096	8.5324	8.04129	8.56333	8.22099	8.57319	8.17802	8.09723	8.0025	7.70195	8.13418	8.85459	5.81283
LOC100576901	GB55767	8.35057	8.43448	8.83578	8.54087	8.61577	8.58483	8.64593	8.72328	8.72423	8.76456	8.67558	8.56121	8.41895	7.6525	9.26564
LOC100576902	GB42701	14.5224	14.282	14.9544	13.7824	14.2058	12.5033	13.7512	13.2587	14.2947	14.6196	13.7233	13.7174	13.5242	13.9988	15.4005
LOC100576903	#N/A	4.9566	5.33777	5.6194	4.74514	5.13911	4.92327	5.22185	4.94791	4.91196	5.77147	5.41324	5.39287	5.46844	4.27134	5.81283
LOC100576908	GB45679	6.54416	6.08132	6.08833	6.53685	6.67122	6.85717	6.0192	6.2975	5.95371	6.22504	7.13003	7.06801	6.95168	6.2393	5.81283
LOC100576912	GB47941	4.59393	4.38763	4.71045	4.61218	4.62813	4.65152	4.1606	4.14006	4.7603	4.32807	5.06161	5.70635	5.02756	4.27134	6.28431
LOC100576913	#N/A	4.42467	4.50093	4.30354	3.73194	4.37415	4.43016	4.1606	4.07647	4.33027	4.26337	4.26697	4.31746	4.53888	4.80033	2.82187
LOC100576914	GB52404	3.50401	3.29426	3.40289	3.28253	3.54253	2.82187	4.07936	2.82187	2.82187	4.04203	2.82187	2.82187	3.66773	2.82187	2.82187
LOC100576915	GB50951	7.55927	7.65864	7.46432	7.66999	7.5243	8.56642	7.90384	8.02239	7.79369	7.8072	8.06136	7.67872	8.02405	8.0162	6.28431
LOC100576916	GB48844	7.08925	6.75168	7.97865	7.89398	7.60671	6.23142	6.79368	6.79574	7.20702	7.16343	7.1239	7.8805	7.63185	5.79065	9.93768
LOC100576917	#N/A	7.79223	7.66953	7.35569	7.3541	7.89053	6.48941	7.27038	6.77078	7.649	7.38516	7.49086	7.48474	7.54262	7.02384	8.92661
LOC100576918	#N/A	7.08067	7.25039	6.81382	7.08659	6.537	8.34664	7.48338	7.61512	7.13632	7.29631	7.54232	7.22075	7.54745	7.87337	2.82187
LOC100576919	GB54699	9.36248	9.22137	9.2453	9.55604	9.30769	9.86619	9.54051	9.26881	9.36442	9.65603	9.78673	9.83383	9.95056	9.78449	9.04869
LOC100576923	GB40485	3.88621	4.04072	3.63819	3.73194	4.30093	3.65661	3.78484	3.25178	7.97859	3.86146	4.31717	3.99992	4.2491	7.8177	2.82187
LOC100576924	GB40159	5.78414	5.78939	5.54792	4.97523	6.03601	5.30939	5.46147	5.0953	5.93698	5.39525	5.72578	5.81857	5.80123	6.21778	6.28431
LOC100576925	#N/A	6.54416	6.61131	6.43959	6.40604	6.7461	5.55937	7.01107	6.70201	6.52122	6.89177	6.63822	5.79684	6.37405	6.12829	7.15657
LOC100576927	#N/A	4.15136	4.50093	4.39697	4.08921	4.7889	3.89004	4.30651	4.36219	4.63324	4.65475	4.10068	4.72039	4.30282	4.17125	5.09416
LOC100576929	#N/A	8.01983	8.22905	7.14624	7.76959	7.60671	7.80241	8.65766	7.86284	8.84197	7.96172	7.58309	6.94662	7.54262	9.10746	6.92042
LOC100576930	GB42111	7.21215	7.30735	7.45478	7.2951	7.07101	8.22276	7.33766	7.6655	7.09216	6.95575	7.30829	7.29143	7.38398	7.90709	2.82187
LOC100576932	GB49703	6.14169	6.39088	5.72016	5.62888	5.5067	5.68084	5.90424	5.56194	6.05009	5.42203	5.08815	4.94423	5.26596	6.30195	5.81283
LOC100576933	GB53109	3.65356	4.11976	3.63819	3.92777	3.94466	3.50654	3.31001	3.56114	4.14197	3.63391	4.10068	3.31389	3.55697	3.79276	2.82187
LOC100576934	GB43586	8.85093	8.76902	9.47948	8.99198	9.00789	8.67925	8.9065	8.83743	8.66781	9.13885	8.89094	9.1809	8.72006	8.80539	9.4977
LOC100576935	GB42637	3.50401	3.75456	3.96189	2.82187	4.30093	3.30825	3.78484	3.42764	4.07096	3.75558	3.74043	4.08885	3.85079	3.61945	5.09416
LOC100576936	GB41965	9.0283	8.61987	8.48414	8.11832	9.23191	5.3979	6.38937	6.2007	7.7612	8.19488	7.8061	9.01247	7.1995	5.26036	9.16124
LOC100576938	GB51540	7.8837	7.93175	8.1241	7.73551	7.57976	7.34974	7.98991	7.80683	7.90406	7.60023	7.5331	7.04999	7.6364	8.28598	5.81283
LOC100576944	GB52403	3.88621	3.95483	3.63819	3.28253	3.83097	2.82187	4.07936	3.42764	3.46087	3.75558	3.23819	3.5144	3.66773	3.61945	2.82187
LOC100576945	GB51003	8.24726	8.40547	8.35174	8.73559	8.21762	9.02095	8.26767	8.8434	8.41707	8.19488	8.19879	8.14898	8.10169	9.01466	6.28431
LOC100576947	GB45294	5.10562	5.52181	5.58412	5.41893	5.35183	5.60924	5.64144	5.20242	5.28327	6.31184	5.51274	5.6344	5.52977	5.63549	5.09416
LOC100576948	#N/A	5.30183	5.05711	4.30354	4.61218	5.01852	4.07505	4.49496	4.63076	5.93698	5.68657	5.56915	5.75233	5.66308	3.61945	6.63751
LOC100576949	GB55406	5.8874	5.63963	6.78357	6.16203	6.20571	6.50246	6.30173	6.71079	5.90292	6.73382	6.89074	6.82464	7.25974	5.07541	7.15657
LOC100576951	GB54697	6.7206	6.93485	6.63893	7.0553	6.65836	7.39225	7.31558	7.45767	6.84832	7.08393	7.31368	6.74837	6.89957	7.90041	2.82187
LOC100576954	GB47691	5.06992	4.69965	5.06936	4.08921	4.22255	4.36766	4.80094	4.67022	4.7603	4.70152	4.85898	3.902	4.73587	5.07541	2.82187
LOC100576956	GB40700	9.29195	9.3772	9.61612	9.48462	9.66384	9.7432	9.78196	10.2175	9.53591	9.73991	9.43164	9.96188	9.71863	9.61539	9.21438
LOC100576957	GB48401	2.82187	3.29426	3.40289	2.82187	3.54253	3.30825	3.50899	3.25178	3.46087	3.48776	3.40863	2.82187	3.4242	3.38939	2.82187
LOC100576958	GB49933	9.69377	9.79749	9.18607	9.41871	9.60499	9.1105	9.56718	9.1291	9.76126	9.55965	9.52865	9.17469	9.57344	9.5635	9.36299
LOC100576960	GB47968	10.2213	10.3211	10.0455	10.3086	9.70179	10.7354	10.2099	10.5062	10.3859	10.1366	10.0196	9.99865	9.99367	10.6648	8.48256
LOC100576961	GB48975	5.8874	5.72717	6.51534	6.60345	6.32492	5.91574	5.64144	6.06958	5.71896	5.77147	5.58745	5.81857	6.22397	5.63549	6.28431
LOC100576963	GB51144	6.44031	6.50535	6.1373	6.95711	7.14651	7.15774	6.31672	6.11021	6.54333	6.40683	7.51448	7.8805	7.36766	6.10501	6.28431
LOC100576965	GB44638	5.80541	5.86826	5.84407	6.02221	6.50857	5.91574	6.24014	5.96997	6.14031	5.98143	6.46403	6.73713	6.22397	5.93027	7.69504
LOC100576966	#N/A	6.07359	6.0977	6.16116	6.17675	6.09487	7.08181	6.51147	6.73681	6.5651	6.57967	6.65538	6.09204	6.54908	6.56257	6.28431
LOC100576967	GB52889	6.7206	6.76193	6.45891	6.49066	6.41971	7.19825	6.53724	6.95922	6.94261	6.63665	6.62957	6.32101	6.57785	7.23011	6.63751
LOC100576969	#N/A	4.69488	4.19318	4.48338	4.29179	4.73758	3.98699	3.78484	3.93565	4.63324	4.44732	4.03877	4.17062	4.19261	3.93632	2.82187
LOC100576972	GB41875	6.77488	6.79224	6.51534	6.51394	6.98103	5.99225	6.72818	6.05578	6.49877	6.33963	6.47375	6.29048	6.88432	5.84818	7.35931
LOC100576974	#N/A	7.62556	7.67495	7.66797	7.68026	7.49574	7.99839	7.74787	7.87845	7.59208	7.39836	7.30829	7.3588	7.36217	7.85965	2.82187
LOC100576975	GB41976	7.76576	7.86225	7.74825	7.80758	7.45181	8.31021	8.04008	7.8391	7.94181	7.91203	7.97554	7.71343	8.0617	8.49993	6.28431
LOC100576976	GB45464	6.07359	5.72717	6.88676	6.02221	5.81987	5.27855	6.1592	5.65736	6.40524	5.99904	5.83646	5.83997	6.27186	5.9566	2.82187
LOC100576978	GB46966	6.05604	5.97882	6.35959	5.41893	5.38424	6.29293	6.64777	6.53401	5.14095	5.88987	5.99444	7.05903	5.42597	6.28137	2.82187
LOC100576982	GB47943	7.55309	7.30036	7.51111	7.16196	7.28656	7.44703	7.27802	7.31569	7.31338	7.25337	7.32976	7.26045	7.08427	7.3231	9.4093
LOC100576983	GB54104	7.61966	7.83832	7.56532	7.45336	7.77057	7.86406	8.04902	7.63364	7.58148	7.38516	7.38207	7.58187	7.35667	8.59813	6.92042
LOC100576984	GB52402	3.77799	3.86033	3.8153	3.61319	4.04604	3.50654	3.89378	3.6725	3.99458	3.29479	3.74043	3.31389	2.82187	3.93632	2.82187
LOC100576985	GB44867	6.85766	6.51752	6.38001	6.24812	6.57861	6.21561	6.71697	5.79759	6.84832	6.36689	6.17284	5.92245	6.24812	6.73841	7.15657
LOC100576986	GB55611	5.03322	4.78817	4.84156	4.08921	4.44295	7.96596	4.49496	3.42764	4.94723	5.25282	4.76132	4.94423	4.49533	3.61945	6.92042
LOC100576987	#N/A	3.77799	4.04072	3.96189	3.47063	2.82187	3.30825	3.31001	3.56114	3.46087	3.86146	2.82187	3.902	3.66773	2.82187	2.82187
LOC100576989	GB43162	8.44697	8.72535	8.4219	8.25514	7.86286	8.5257	8.23672	8.1881	8.25332	7.86057	7.5331	7.95003	7.75402	8.594	8.19582
LOC100576990	GB54980	6.42678	6.23717	5.68738	6.10159	6.0559	6.98319	6.70566	6.4836	6.36851	6.33963	6.5492	6.25928	6.67865	6.56257	2.82187
LOC100576993	#N/A	7.93211	7.71756	8.30476	8.29912	8.63878	6.15057	8.60108	8.23128	7.29403	9.27899	8.93355	9.65516	7.88966	7.41044	9.6209
LOC100576994	GB54782	3.77799	3.48702	3.8153	3.73194	3.54253	3.50654	4.1606	3.25178	3.46087	3.63391	3.23819	2.82187	3.24932	3.61945	2.82187
LOC100576996	GB55685	6.9735	6.86056	6.47797	6.45501	6.40434	6.46295	6.62393	6.67535	7.08466	6.76479	6.3838	6.10968	6.44874	7.21939	5.09416
LOC100576999	#N/A	5.20731	5.05711	5.39273	5.49253	4.88571	5.33953	4.75491	5.2279	5.07949	5.28253	5.26048	4.94423	5.44737	5.17109	5.09416
LOC100577000	GB46793	8.45693	8.70168	8.38725	8.84002	8.36685	8.93027	8.52307	9.00846	8.69752	8.41185	8.38439	7.94518	8.46053	8.72073	8.29787
LOC100577001	GB50288	5.64921	5.96099	5.16998	5.20064	5.38424	5.97351	5.77902	5.58156	5.67906	5.39525	5.03451	5.47818	5.52977	6.17374	5.09416
LOC100577002	GB51841	10.0974	10.1116	10.5062	10.0922	10.1248	9.85864	10.0534	10.3196	9.70388	9.93671	9.89311	10.4461	10.039	9.88262	10.0295
LOC100577003	GB49001	7.76041	7.70702	7.88235	7.82621	7.57976	7.40614	7.93311	7.58212	7.95827	7.73628	7.80227	6.97556	7.63185	8.05883	6.92042
LOC100577004	GB50911	6.32828	6.26639	4.90237	5.73306	7.2528	5.077	5.22185	4.45867	5.88558	4.91236	6.19659	6.33603	5.80123	5.63549	5.81283
LOC100577012	#N/A	3.77799	3.48702	3.40289	3.28253	3.33407	2.82187	3.50899	3.25178	3.46087	3.48776	3.53808	3.902	3.85079	3.79276	2.82187
LOC100577013	GB53869	3.50401	3.63301	4.08877	3.28253	3.70007	2.82187	3.50899	3.25178	4.44018	3.63391	3.40863	3.5144	3.55697	2.82187	5.81283
LOC100577014	#N/A	10.363	10.1026	10.8338	10.003	10.6481	8.59698	9.9002	9.66368	10.366	10.2057	9.83529	10.179	10.0139	8.24964	12.7722
LOC100577015	GB48650	5.90717	5.52181	6.1373	5.07657	5.84305	3.78146	5.46147	4.85074	6.11087	5.83192	5.18933	4.76843	5.46844	4.44797	7.69504
LOC100577017	#N/A	4.48382	4.32651	4.56389	4.35173	4.50792	3.50654	4.1606	4.0086	4.79994	4.26337	4.31717	4.67043	4.49533	4.5271	6.28431
LOC100577019	GB47508	9.70912	9.77121	8.82473	8.86273	9.93072	9.34817	9.69359	9.02957	9.62234	9.46891	9.73947	9.93888	9.64166	10.1195	9.04869
LOC100577020	#N/A	7.30342	7.28626	6.40015	6.34236	6.72157	6.08238	7.16728	6.67535	7.58679	7.31034	6.83166	6.78156	6.89957	7.8458	6.63751
LOC100577021	GB43745	5.03322	5.12477	4.30354	5.00989	5.21382	5.077	5.00912	4.88395	4.54059	4.44732	5.00685	4.98468	5.13881	4.36308	5.81283
LOC100577023	GB42394	3.65356	3.75456	3.8153	3.92777	3.83097	4.23122	2.82187	3.7696	3.71846	4.04203	4.03877	4.24651	4.00212	4.17125	2.82187
LOC100577024	GB40192	3.65356	3.75456	3.8153	3.73194	3.94466	2.82187	3.50899	3.42764	3.91163	3.48776	3.64614	3.79229	3.4242	2.82187	2.82187
LOC100577026	GB42550	6.62922	6.90744	7.41596	7.0553	6.93915	6.2778	6.81487	6.2975	7.16502	6.92868	6.53998	6.89705	6.80556	6.78284	7.53695
LOC100577027	GB55872	6.73162	6.92578	6.65575	7.24747	6.61904	7.80765	7.06505	7.56774	6.90052	7.08393	7.06747	6.86647	7.12372	7.58739	5.09416
LOC100577028	#N/A	5.30183	5.36563	6.62192	5.5395	5.91036	5.30939	7.93311	7.43672	5.65868	7.9212	7.32442	7.03174	5.89656	8.45049	7.53695
LOC100577030	GB54178	5.94589	5.5937	5.6194	6.08607	6.49414	4.43016	5.22185	5.14993	6.36851	6.06739	6.64683	6.72581	6.06974	4.44797	8.08599
LOC100577032	#N/A	5.92666	5.63963	5.54792	6.07037	5.9535	4.30153	5.04704	4.85074	5.83221	5.83192	5.98079	6.10968	5.8655	4.17125	7.15657
LOC100577033	GB51756	7.40305	7.66409	7.04801	7.10962	7.07101	7.7598	7.36658	7.21465	7.29403	7.14004	7.08652	7.13791	7.14943	7.49277	7.96709
LOC100577039	#N/A	3.50401	3.48702	3.40289	3.61319	3.33407	3.78146	3.31001	3.85651	3.46087	3.63391	3.53808	3.31389	2.82187	3.38939	5.09416
LOC100577042	#N/A	5.57648	5.15735	5.84407	5.51621	5.7963	4.65152	5.82202	5.45941	5.95371	5.02403	5.5506	5.45033	5.97133	4.80033	7.35931
LOC100577043	GB49262	6.22244	6.41713	5.93029	5.65035	5.38424	7.28354	6.33155	6.16263	6.62848	7.56557	7.67397	7.85483	6.73928	5.26036	5.09416
LOC100577044	#N/A	6.3854	6.0977	6.1373	6.13213	5.91036	5.68084	5.94362	6.22553	6.26568	6.03363	5.75831	5.83997	6.0284	5.90343	7.15657
LOC100577045	GB48270	8.62235	8.49998	7.9919	6.7575	9.21232	7.1495	8.31659	7.25712	9.06918	8.00114	8.05494	8.77052	8.07515	8.34128	8.79323
LOC100577046	#N/A	7.32536	7.47207	7.56532	7.76959	7.5933	7.66483	7.63957	7.59636	7.44785	7.44996	7.40753	7.23676	7.35667	7.62032	5.81283
LOC100577047	GB55757	5.86735	5.28027	6.11302	5.92063	5.9535	4.36766	5.18868	5.52184	5.412	5.39525	5.11418	5.6588	5.71651	5.26036	7.15657
LOC100577050	GB54201	5.96486	5.82938	5.51074	6.52544	6.38881	7.15774	5.86373	6.1235	5.46027	5.85151	7.1239	6.93684	7.31755	6.56257	5.09416
LOC100577053	GB41782	8.69425	8.74091	9.26997	8.12585	8.92476	8.5415	8.83599	9.14046	9.17504	8.73631	8.89274	8.05294	8.91022	7.95303	9.77033
LOC100577054	GB44024	7.40991	7.38877	8.47473	8.11832	8.07544	5.50763	7.15074	7.55322	7.33248	7.17115	7.00205	7.12936	6.73928	5.73064	10.0876
LOC100577057	GB53514	3.98284	4.44565	4.56389	4.29179	4.44295	5.21468	4.37282	4.7816	4.33027	3.86146	4.65544	4.17062	4.49533	4.17125	5.09416
LOC100577060	GB46602	7.75503	7.80413	7.71667	7.82621	7.55921	8.48379	7.90876	8.11094	7.70863	7.73628	7.83639	7.66105	8.03442	8.36574	7.15657
LOC100577061	GB54310	4.83245	4.50093	4.96044	4.29179	4.37415	4.23122	6.34623	4.88395	5.22814	6.43284	5.37132	6.01917	4.2491	5.07541	6.28431
LOC100577062	GB40191	2.82187	2.82187	3.63819	3.28253	2.82187	2.82187	2.82187	2.82187	3.60138	3.29479	3.53808	3.31389	3.4242	2.82187	2.82187
LOC100577063	GB43254	3.98284	3.75456	3.40289	3.28253	3.70007	2.82187	3.65958	4.0086	3.71846	2.82187	3.64614	3.79229	3.92953	3.93632	2.82187
LOC100577064	#N/A	4.64544	4.55375	5.06936	5.17069	4.68406	4.65152	5.18868	4.25676	4.7603	5.15954	5.5318	5.23759	5.35969	4.67126	5.81283
LOC100577065	GB54179	4.59393	3.95483	3.96189	3.61319	4.13804	3.50654	4.43549	3.56114	4.14197	3.95605	3.90178	3.31389	3.76433	2.82187	2.82187
LOC100577068	GB52399	3.30644	3.63301	2.82187	2.82187	3.33407	2.82187	3.31001	3.25178	2.82187	2.82187	3.40863	3.31389	2.82187	3.61945	2.82187
LOC100577071	#N/A	5.17427	4.87089	4.96044	6.02221	5.38424	5.36903	4.60566	5.2279	4.94723	5.25282	5.7901	6.3509	5.66308	4.36308	6.28431
LOC100577073	#N/A	4.07062	4.04072	4.30354	3.73194	4.22255	3.78146	4.37282	5.14993	3.27554	3.48776	3.97273	3.66611	3.92953	4.36308	2.82187
LOC100577074	GB45521	5.06992	5.18915	5.54792	5.00989	5.97459	4.88182	4.75491	5.20242	5.04765	5.59613	4.94971	5.27011	5.56919	4.91746	7.15657
LOC100577077	GB47688	7.81307	7.69641	6.98301	7.81693	7.78244	8.11282	7.56047	7.42081	7.53281	7.79728	7.92007	8.1616	8.20624	7.73747	6.63751
LOC100577080	GB54519	3.98284	3.86033	2.82187	3.61319	3.83097	3.50654	3.65958	3.25178	3.99458	3.63391	3.40863	3.79229	3.4242	3.38939	5.09416
LOC100577081	GB50057	6.69829	6.69931	6.6047	7.07883	6.63226	7.65904	6.9065	6.70201	6.81244	6.84426	7.18999	7.20456	7.10413	6.21778	7.15657
LOC100577082	GB49004	8.36826	8.32513	8.20024	7.84916	8.04622	7.01984	8.00836	7.69666	8.14244	7.76201	7.54232	7.26045	7.72444	7.99754	7.53695
LOC100577083	#N/A	3.98284	3.29426	3.63819	3.28253	3.33407	2.82187	3.65958	2.82187	3.60138	3.48776	3.64614	2.82187	3.4242	2.82187	2.82187
LOC100577086	GB47895	4.42467	4.38763	4.20153	4.16112	4.62813	5.077	5.00912	4.5478	4.38654	4.60614	4.79471	4.61837	4.69891	4.06067	5.09416
LOC100577091	GB53864	2.82187	3.75456	3.63819	2.82187	3.54253	3.65661	2.82187	3.42764	3.27554	3.29479	3.23819	3.66611	3.55697	3.38939	2.82187
LOC100577092	GB49857	8.347	8.19554	7.945	7.27488	8.50922	7.29105	8.57966	8.17868	8.48964	7.97937	8.20751	8.50953	8.02058	9.07225	8.79323
LOC100577094	GB40884	9.68956	9.76868	9.45101	9.64651	9.57463	10.0748	9.36207	9.88057	9.96632	9.31937	9.54363	9.29211	9.37578	10.1036	7.35931
LOC100577095	GB43001	3.65356	3.63301	3.96189	3.73194	4.04604	3.65661	3.31001	3.25178	3.60138	3.29479	3.40863	3.31389	3.4242	3.38939	2.82187
LOC100577098	GB42552	6.00204	6.16139	6.16116	6.03844	6.25803	4.92327	6.25579	4.85074	6.4292	6.14841	6.11169	6.65591	5.7847	5.34409	8.08599
LOC100577099	GB41552	4.48382	4.50093	5.51074	4.86535	4.68406	3.89004	3.78484	4.07647	4.63324	4.98786	3.90178	3.902	4.66082	4.17125	5.81283
LOC100577101	GB52398	2.82187	3.75456	2.82187	3.28253	3.54253	3.30825	3.65958	3.56114	3.46087	3.63391	3.53808	3.66611	3.4242	3.61945	2.82187
LOC100577102	GB50945	8.20455	8.2068	7.77915	7.85823	8.12285	8.56023	8.33132	8.12409	8.38395	8.19488	8.28912	8.17825	8.38155	8.55626	7.35931
LOC100577103	GB45301	4.07062	4.26187	3.63819	4.16112	4.68406	3.89004	3.89378	3.93565	4.38654	3.63391	3.97273	4.08885	3.85079	4.60131	2.82187
LOC100577104	#N/A	10.134	10.0505	10.2658	9.50209	9.97658	9.29699	10.1249	9.78347	10.125	10.1542	10.1451	9.1538	9.79068	9.25086	11.4981
LOC100577106	GB55622	5.90717	6.01382	6.67236	5.44391	6.03601	2.82187	5.37649	4.88395	6.21132	5.66451	4.92017	5.33288	5.19113	5.02485	7.83748
LOC100577107	#N/A	4.07062	3.95483	5.30798	4.29179	4.62813	3.50654	4.1606	4.36219	4.71937	4.5555	4.21436	3.99992	4.90599	4.44797	6.28431
LOC100577108	GB54942	6.42678	6.45561	6.72109	6.51394	6.65836	6.11689	6.71697	6.01352	6.99154	6.38033	5.5506	6.29048	5.75102	6.64519	6.92042
LOC100577109	#N/A	4.91653	4.8302	4.30354	3.83535	4.04604	4.07505	5.00912	4.25676	4.63324	5.3116	4.15906	3.902	4.19261	4.60131	2.82187
LOC100577112	GB50124	5.86735	5.84896	6.56963	6.07037	6.15137	6.51539	6.10831	7.13229	5.52962	5.90866	5.72578	5.58426	6.14896	6.76818	6.28431
LOC100577113	GB48962	7.48328	7.45956	6.98301	6.45501	7.31953	6.06481	7.3522	7.33847	7.14355	6.93776	6.9335	6.40886	7.23594	7.42914	7.69504
LOC100577118	GB42323	6.26877	6.11389	5.47252	6.17675	6.68398	6.06481	5.98191	6.34353	6.03448	5.4483	6.40428	6.53123	6.63371	6.45666	6.28431
LOC100577120	GB49084	6.10805	6.26639	5.8734	6.07037	6.41971	6.67361	6.53724	6.39905	6.21132	6.08397	6.65538	6.25928	6.49979	6.62904	2.82187
LOC100577121	GB43624	4.69488	5.15735	3.63819	4.40866	5.01852	4.23122	4.60566	4.14006	4.33027	3.75558	4.65544	4.50704	4.13295	5.07541	2.82187
LOC100577122	GB50534	7.75503	7.61421	7.54748	7.55182	7.48125	8.23447	7.69758	7.83511	7.51622	7.43723	7.71122	7.78586	7.74563	7.54515	6.63751
LOC100577127	GB48809	7.66048	7.81888	7.37607	7.58502	7.26132	8.05234	7.89891	7.57734	7.76589	7.38516	7.68233	7.56296	7.64545	8.23909	6.28431
LOC100577128	GB47840	4.36235	3.95483	4.90237	4.35173	4.37415	4.07505	5.18868	5.54203	4.07096	4.50264	3.74043	3.5144	3.76433	4.44797	2.82187
LOC100577132	GB42554	10.4209	10.5047	13.471	12.7646	12.7682	11.4204	10.8657	12.5518	9.63006	10.1405	12.1069	12.2599	12.5793	10.6609	14.1056
LOC100577133	GB54001	3.30644	2.82187	4.20153	4.08921	4.04604	3.50654	2.82187	4.7816	3.27554	2.82187	3.82486	3.31389	3.4242	3.61945	2.82187
LOC100577135	GB47929	4.99547	5.33777	6.08833	5.00989	5.13911	5.077	5.66533	5.79759	5.46027	5.72967	4.10068	3.902	5.05627	4.17125	5.81283
LOC100577136	GB51851	6.68701	6.57686	6.45891	6.11694	6.30849	6.26251	6.68278	6.62977	6.55426	6.17956	5.83646	6.16132	6.38496	6.56257	5.81283
LOC100577138	GB50909	9.1922	9.18201	9.22863	9.18818	9.26819	9.02769	9.19307	9.06238	9.41298	9.49673	9.11885	9.13688	9.21354	8.7765	9.90573
LOC100577139	#N/A	9.21974	9.22875	10.151	8.81927	9.45197	8.85135	10.9921	10.7756	9.19253	10.8576	10.2201	10.7722	9.35802	11.0178	10.1973
LOC100577140	GB44735	7.8285	7.82863	8.1301	8.08392	8.00125	8.35739	7.83315	8.00827	7.85213	8.14493	8.40473	8.30114	8.45282	7.67618	7.53695
LOC100577141	#N/A	4.07062	3.63301	3.8153	4.22842	3.83097	2.82187	5.56717	3.42764	3.91163	3.48776	3.53808	2.82187	3.4242	4.06067	2.82187
LOC100577142	GB54941	5.76254	5.39293	5.6194	5.92063	6.03601	4.65152	5.37649	4.91632	6.33082	5.5242	5.16474	5.98128	5.21654	4.80033	6.63751
LOC100577143	GB49848	4.48382	4.60434	6.25279	5.17069	4.73758	4.36766	4.55158	7.07914	4.33027	5.09351	3.64614	2.82187	3.85079	5.46073	5.09416
LOC100577145	GB49027	8.76273	8.87155	8.80611	9.05646	8.7991	8.94459	8.72888	8.85133	8.82188	8.73371	8.75694	8.63843	8.66332	8.8921	7.15657
LOC100577146	GB54787	6.83741	6.30911	8.78345	7.47123	6.85153	6.75207	6.77218	7.03097	6.70884	6.91035	6.9886	7.12075	6.44874	5.07541	9.10606
LOC100577147	GB51887	3.30644	3.95483	3.63819	3.61319	3.33407	2.82187	3.31001	2.82187	3.99458	3.63391	3.74043	3.5144	3.66773	4.06067	2.82187
LOC100577149	GB46368	9.14578	9.0817	9.36714	9.01852	8.73038	7.40614	9.50687	8.46109	9.48146	9.2484	8.16042	7.79669	8.20929	8.79822	9.45418
LOC100577150	GB54516	6.77488	6.50535	6.88676	6.0545	6.80563	4.74875	5.98191	6.54388	6.53232	6.50814	6.27668	5.47818	5.60751	5.02485	7.83748
LOC100577155	GB52705	3.98284	3.48702	3.63819	5.46843	4.22255	3.30825	3.31001	2.82187	3.71846	4.12114	3.53808	5.88182	3.4242	2.82187	2.82187
LOC100577156	GB42434	9.00814	8.70433	11.3978	10.7122	9.75389	5.50763	9.34947	9.58507	9.26542	10.3508	6.88348	8.78689	7.15578	6.96086	11.5403
LOC100577158	#N/A	8.82811	8.62826	8.63101	9.29391	8.73343	9.91672	9.05134	9.03131	8.22639	8.48161	8.94228	9.46143	9.02897	9.51187	5.09416
LOC100577159	GB48183	3.50401	3.86033	4.20153	4.46291	4.56952	3.50654	4.80094	4.74556	4.38654	4.26337	4.31717	4.17062	4.2491	4.17125	5.09416
LOC100577161	GB46103	4.22632	4.55375	5.75218	5.14005	4.44295	4.07505	5.11974	5.00887	4.7603	5.49936	4.65544	4.56399	4.30282	4.5271	5.09416
LOC100577163	#N/A	10.8451	10.6023	11.67	10.8963	10.9488	10.2359	10.5435	10.6709	10.7245	11.066	11.4073	11.8381	11.5948	8.66665	12.4675
LOC100577164	#N/A	3.50401	3.86033	3.40289	4.16112	2.82187	3.65661	3.50899	3.6725	3.27554	3.29479	4.15906	4.38418	3.24932	2.82187	2.82187
LOC100577165	GB48743	4.07062	3.63301	3.96189	3.61319	3.83097	2.82187	3.65958	3.42764	4.5878	4.12114	3.64614	3.902	3.66773	2.82187	5.09416
LOC100577168	GB42378	7.31077	7.44695	7.65969	7.36689	7.63971	6.39456	7.19174	7.36089	7.43024	7.42439	7.02857	7.06801	7.13663	6.86776	8.48256
LOC100577174	GB51515	7.01012	6.98815	6.84344	6.66707	7.08066	6.74112	7.04728	6.80396	7.03886	7.18645	6.73014	6.9071	7.04371	6.72329	7.69504
LOC100577178	GB53641	11.1881	11.2465	11.9637	10.5841	11.8366	10.9086	12.7313	10.316	11.3564	11.0639	10.6208	11.6984	11.2896	11.2878	11.6885
LOC100577180	#N/A	5.98357	6.031	6.08833	6.10159	5.9535	6.23142	6.17576	6.24993	6.18334	6.05061	5.95309	5.90228	6.0284	5.98244	5.81283
LOC100577185	GB42108	4.15136	3.86033	4.96044	3.73194	4.22255	5.00239	3.89378	4.94791	4.27104	3.95605	5.06161	3.99992	4.00212	2.82187	5.81283
LOC100577186	#N/A	3.50401	3.75456	3.8153	3.28253	3.83097	3.50654	4.37282	4.2	3.99458	3.95605	4.21436	3.31389	4.45012	3.38939	2.82187
LOC100577192	GB54258	7.32536	7.40191	8.01803	7.68538	7.24424	8.09151	7.26271	7.52869	6.93429	7.3584	7.32442	7.29143	7.71587	7.42914	5.81283
LOC100577194	GB48976	6.54416	6.49308	6.68879	6.65667	6.72157	7.15774	6.8966	6.61113	6.81244	6.80508	6.64683	6.24341	6.86115	7.2513	2.82187
LOC100577196	GB53403	8.09403	8.06143	7.98529	8.30577	8.08025	8.40653	8.17275	8.26135	8.22639	8.16048	8.1753	8.65932	8.30086	8.27569	7.69504
LOC100577197	GB46458	4.87518	5.39293	4.30354	4.40866	4.44295	4.59987	4.92983	4.50407	4.71937	4.38924	4.03877	3.79229	4.80667	5.21647	2.82187
LOC100577198	GB55973	9.208	9.05289	12.129	10.4436	11.4423	8.71033	9.35669	12.0347	9.3489	9.40508	9.47196	10.137	10.7114	8.65082	12.109
LOC100577201	#N/A	5.55136	5.33777	5.8141	5.41893	5.6721	5.21468	5.43373	4.85074	5.81396	5.6193	5.77429	5.33288	5.95669	5.21647	8.08599
LOC100577202	GB55095	3.50401	3.63301	3.40289	2.82187	2.82187	2.82187	3.31001	2.82187	3.46087	2.82187	3.23819	2.82187	3.4242	3.61945	2.82187
LOC100577206	#N/A	4.42467	4.38763	4.7777	4.70239	5.01852	3.98699	4.236	4.0086	4.5878	4.98786	4.69174	5.02391	3.92953	4.36308	6.28431
LOC100577209	GB49988	7.3326	7.23579	7.13432	7.62813	7.11866	7.82325	7.72015	7.94297	7.28098	7.49364	7.79458	7.51785	7.88202	7.95303	5.81283
LOC100577210	GB41776	6.66417	6.61131	6.78357	6.83334	6.81724	6.86726	6.61187	6.43135	6.31802	6.79511	6.98182	6.83521	7.01602	6.59619	5.81283
LOC100577211	#N/A	3.77799	3.95483	4.08877	4.08921	4.62813	4.30153	4.30651	4.2	3.60138	4.60614	4.26697	4.24651	3.92953	3.61945	2.82187
LOC100577213	#N/A	6.70949	6.70994	6.43959	6.84255	6.2408	6.56597	6.05552	6.0968	5.11058	7.12423	6.68074	7.22878	7.53776	6.00783	6.92042
LOC100577214	GB42377	7.75503	7.515	7.51111	7.43526	7.82894	6.77371	7.71454	7.33847	7.78448	7.77217	7.52847	7.47802	7.24789	6.93487	8.72161
LOC100577215	#N/A	3.98284	4.38763	3.96189	4.74514	5.05995	4.83899	4.80094	5.00887	4.33027	4.26337	4.53959	4.17062	4.19261	4.60131	2.82187
LOC100577216	#N/A	8.90526	8.97388	8.94192	8.41741	9.21013	10.4955	10.8945	10.5658	9.93757	10.6722	10.549	9.67435	10.7782	9.85353	9.16124
LOC100577220	GB46246	4.83245	4.44565	4.30354	4.65811	4.56952	5.50763	5.04704	4.81664	4.83838	4.50264	5.11418	4.98468	5.33686	4.73746	2.82187
LOC100577221	GB42555	6.88751	6.58843	6.27481	6.66707	6.68398	7.68775	7.29316	7.10596	7.06956	6.86345	6.94747	6.84571	7.00901	6.99898	5.09416
LOC100577222	GB40110	7.4303	7.23579	7.03524	6.5594	6.98103	5.65738	6.44493	6.35481	7.18618	6.65882	6.62957	6.83521	6.85334	6.28137	8.56672
LOC100577224	GB53636	9.34294	9.36721	9.58588	8.63625	8.78443	9.06095	9.78998	9.44675	9.96632	9.3804	8.90885	8.23902	8.82724	9.35953	7.35931
LOC100577226	GB52395	4.64544	4.38763	4.56389	3.28253	4.37415	3.65661	4.1606	3.7696	4.54059	4.12114	4.26697	3.5144	3.55697	4.17125	2.82187
LOC100577228	GB51885	6.94541	7.09724	6.20772	6.90537	6.7582	7.11605	6.8966	6.46293	7.08466	7.09208	7.10533	6.87673	7.25974	7.5622	6.63751
LOC100577230	GB55035	4.22632	4.19318	3.63819	3.47063	3.83097	3.65661	3.65958	3.56114	3.71846	3.75558	3.74043	3.79229	3.66773	3.79276	2.82187
LOC100577231	GB46800	6.29884	6.17688	5.84407	6.22	6.35723	6.01074	6.22432	5.92502	6.94261	6.55622	5.7901	5.13504	5.98581	6.17374	5.81283
LOC100577237	GB44697	8.51843	8.56555	8.22288	8.17025	8.42095	8.74349	8.65474	8.42436	8.56679	8.74407	8.38439	8.42488	8.46564	8.92538	8.64625
LOC100577239	GB47518	5.84701	5.63963	4.30354	4.65811	5.99536	5.18157	5.40541	4.50407	6.48741	4.95065	5.45391	5.77476	5.46844	5.81971	5.09416
LOC100577242	GB55860	6.76419	6.26639	7.04801	7.07103	7.22696	4.88182	5.94362	5.6009	6.75686	6.76479	7.00872	7.12936	7.17468	4.60131	9.4093
LOC100577249	GB47126	3.30644	2.82187	3.63819	3.61319	3.33407	2.82187	2.82187	2.82187	2.82187	2.82187	3.40863	3.66611	2.82187	3.38939	2.82187
LOC100577250	GB46651	5.69565	5.82938	5.65381	5.86695	5.53568	6.33738	6.27127	6.08326	5.90292	5.98143	5.96701	5.92245	6.04232	6.57948	5.09416
LOC100577252	#N/A	5.49971	5.63963	4.63936	5.41893	5.56406	5.24699	5.48867	5.37148	6.31802	5.05923	5.5506	5.17011	5.38214	7.01146	5.09416
LOC100577253	GB53634	7.8285	7.95864	7.4738	7.72562	7.64622	8.29165	8.16043	8.13387	7.91253	8.02683	8.09619	7.48474	8.23648	8.27569	6.92042
LOC100577254	GB51854	7.54064	7.49676	7.87522	8.17752	8.15969	8.69911	8.48736	8.71027	8.66781	8.80717	8.54192	8.30494	8.10824	8.43208	8.48256
LOC100577255	GB52445	4.07062	3.75456	4.08877	3.61319	3.70007	3.50654	3.65958	3.25178	3.91163	4.12114	4.03877	3.5144	3.66773	3.61945	2.82187
LOC100577257	#N/A	3.50401	3.29426	3.40289	4.01182	3.83097	3.50654	4.236	3.7696	3.60138	3.75558	3.74043	3.5144	3.66773	3.93632	2.82187
LOC100577259	GB45438	5.06992	4.94861	5.43321	4.65811	5.31862	4.48946	4.97008	5.37148	5.71896	5.12694	5.45391	5.02391	5.05627	5.30287	5.09416
LOC100577260	#N/A	4.29641	4.55375	4.48338	3.92777	4.44295	3.65661	4.65744	3.85651	4.5878	4.38924	4.21436	4.17062	3.92953	4.44797	2.82187
LOC100577262	#N/A	4.54014	4.19318	4.39697	3.73194	4.30093	4.83899	4.07936	4.25676	4.14197	4.5555	4.49836	3.5144	4.80667	3.61945	2.82187
LOC100577263	GB52142	3.77799	3.75456	3.63819	3.83535	3.54253	3.30825	3.31001	3.25178	3.60138	2.82187	3.40863	3.79229	3.4242	2.82187	5.09416
LOC100577264	#N/A	3.30644	3.75456	4.20153	3.92777	4.62813	4.30153	3.78484	3.56114	3.82045	4.26337	4.21436	3.902	3.85079	3.38939	2.82187
LOC100577265	#N/A	3.30644	3.75456	3.96189	3.73194	3.33407	3.30825	4.236	3.6725	4.14197	2.82187	3.64614	3.66611	3.76433	2.82187	2.82187
LOC100577266	#N/A	4.22632	3.95483	4.48338	3.92777	4.13804	3.65661	3.78484	4.25676	3.99458	4.19463	3.82486	3.5144	4.06966	3.93632	5.09416
LOC100577268	GB48917	8.95762	8.76648	9.652	9.03861	8.91132	8.07857	8.8767	9.36052	8.88565	8.86763	8.40978	9.16637	8.60889	8.58986	10.1158
LOC100577269	#N/A	4.36235	4.32651	3.8153	4.22842	4.13804	4.23122	4.07936	4.36219	3.60138	4.12114	4.10068	3.79229	4.13295	4.44797	5.09416
LOC100577272	GB53001	8.08121	8.02797	7.86806	7.91153	8.16423	7.59986	7.65136	7.70981	8.11701	7.97057	8.13019	8.13626	8.23048	7.3528	9.6209
LOC100577273	#N/A	6.37133	5.97882	6.01152	5.67149	6.79392	4.48946	7.11708	6.24993	6.1548	7.06749	7.02857	7.61284	6.00015	7.13068	6.63751
LOC100577275	#N/A	3.88621	3.86033	3.8153	3.47063	4.37415	3.50654	3.50899	4.2	4.33027	4.04203	4.10068	3.99992	4.4031	3.93632	2.82187
LOC100577278	#N/A	2.82187	3.48702	4.39697	3.73194	3.33407	2.82187	3.31001	3.7696	3.71846	3.48776	3.64614	3.5144	2.82187	2.82187	2.82187
LOC100577279	GB54098	7.67193	7.60289	7.65136	7.96292	7.51721	8.53204	7.70891	8.01535	7.66915	7.66168	7.8879	7.61896	7.92352	8.1348	6.28431
LOC100577280	GB41888	7.40305	7.38877	6.68879	7.73057	7.73438	7.56315	6.78297	6.68429	7.33248	7.33113	7.99245	8.45251	8.21841	7.01146	8.19582
LOC100577283	GB41962	5.90717	5.5937	5.06936	5.90297	5.81987	4.23122	5.22185	5.06711	5.38721	5.81206	5.75831	6.3509	5.31364	5.02485	7.53695
LOC100577285	GB48780	7.26609	7.38216	7.04801	7.58502	7.01165	8.18703	7.31558	7.86284	7.11441	7.40491	7.44734	7.26045	7.55227	7.80344	5.09416
LOC100577286	#N/A	2.82187	3.29426	3.96189	3.28253	2.82187	3.30825	2.82187	2.82187	3.27554	3.48776	3.40863	3.31389	3.55697	2.82187	2.82187
LOC100577288	GB54540	7.79747	7.86699	7.71667	7.73551	7.86286	8.38217	8.0356	7.93925	7.62341	7.63407	7.73554	7.60053	7.98539	8.22846	6.28431
LOC100577291	GB51830	5.17427	5.12477	5.06936	5.5395	5.01852	4.54594	4.65744	4.36219	5.31001	5.19136	4.65544	4.8147	4.5809	4.27134	5.81283
LOC100577293	GB53819	6.88751	7.15272	7.04801	6.90537	6.96024	7.83356	7.60966	7.43144	7.1579	7.19404	7.37692	7.1121	7.28314	7.82478	6.28431
LOC100577295	GB44646	7.47676	7.47828	7.39615	7.43526	7.39108	8.02562	7.6036	7.46803	7.5273	7.77723	7.76339	7.75288	7.76652	7.38191	7.69504
LOC100577296	GB44734	5.03322	4.8302	4.63936	5.28668	5.31862	5.077	4.65744	5.2279	5.07949	4.7901	5.11418	5.09902	4.9682	5.30287	5.09416
LOC100577298	GB49819	5.10562	5.15735	4.56389	2.82187	3.83097	4.79468	4.88829	4.25676	4.07096	4.50264	4.94971	4.56399	2.82187	3.61945	2.82187
LOC100577300	GB51900	7.54688	7.95864	7.65969	7.65443	7.57295	8.41342	8.33862	8.37846	8.10597	8.43121	8.1871	7.63111	8.09179	9.11325	6.92042
LOC100577301	GB51232	4.48382	4.26187	4.56389	4.61218	4.50792	3.98699	3.99103	4.31072	4.20844	4.04203	4.49836	4.38418	4.80667	4.06067	5.09416
LOC100577302	GB40446	7.40305	7.67495	7.87522	7.56297	7.35972	8.03458	8.04008	7.85891	7.95827	7.79728	7.66133	7.23676	7.74563	8.41343	6.28431
LOC100577303	#N/A	7.15611	6.93485	7.28203	6.86078	7.07101	6.09974	7.04728	6.23778	7.31338	6.75454	7.05462	6.64392	7.3232	6.73841	8.19582
LOC100577306	#N/A	3.88621	4.32651	4.08877	3.83535	3.83097	3.65661	4.236	3.7696	4.07096	4.19463	3.97273	3.99992	4.13295	4.06067	2.82187
LOC100577307	GB42470	8.57133	8.67762	8.31005	7.78871	8.19561	7.89883	8.69513	8.17868	8.46681	8.56577	7.9236	7.26045	7.99604	8.61455	7.15657
LOC100577308	GB51077	8.10252	8.17276	7.68439	7.30842	7.80005	7.34974	8.22099	7.44723	8.18152	7.63407	7.40247	6.72581	7.47821	8.4596	5.09416
LOC100577313	#N/A	4.54014	5.15735	3.96189	4.74514	4.97574	3.78146	4.49496	3.7696	4.67706	4.60614	4.49836	4.67043	4.13295	4.86023	2.82187
LOC100577317	#N/A	6.55663	6.67781	7.18141	6.52544	6.25803	5.55937	6.77218	6.46293	7.14355	6.97352	6.11169	6.01917	6.3408	6.2393	7.96709
LOC100577320	GB50241	7.1884	7.34184	7.46432	7.36051	7.27819	7.44703	7.90876	7.53363	7.40039	7.7671	7.44243	7.00393	8.02058	7.68398	6.63751
LOC100577322	GB40279	5.27105	5.52181	4.7777	5.17069	5.72312	5.74892	5.56717	4.81664	5.55199	5.39525	5.83646	5.68278	5.40423	6.08133	2.82187
LOC100577324	GB46149	6.10805	6.30911	6.08833	6.61425	6.15137	7.04673	6.22432	6.65729	6.06553	6.3258	6.80119	7.01326	6.95898	6.76818	2.82187
LOC100577325	GB47734	8.5025	8.34224	7.8094	8.4357	8.53046	8.62691	8.40276	8.26135	8.00261	8.1835	8.74702	8.60496	8.74971	8.57735	7.15657
LOC100577327	GB46958	4.64544	5.39293	5.30798	4.35173	4.83822	4.07505	5.04704	4.45867	5.61698	4.65475	4.49836	4.44723	4.4031	3.79276	2.82187
LOC100577328	GB55870	6.59339	6.72049	6.38001	5.97234	6.29187	6.89714	6.77218	6.90677	6.34349	6.57967	6.59441	6.27496	6.82965	7.21939	5.09416
LOC100577330	GB42683	7.23552	7.1053	7.02236	7.16196	7.22696	7.5191	7.1998	7.18353	6.88333	6.90109	7.22479	6.96598	7.21175	7.31306	6.63751
LOC100577332	GB41785	7.26609	7.40191	7.73255	6.94861	7.09026	7.09903	7.92342	7.86284	7.99065	8.27923	7.72748	7.91071	7.61812	7.74495	8.79323
LOC100577335	GB44469	6.35713	6.50535	6.01152	6.40604	6.37311	6.46295	6.38937	6.61113	6.3931	6.01644	6.43447	6.17812	5.89656	6.75337	6.28431
LOC100577336	GB44733	7.48328	7.52103	7.88235	8.05263	7.81168	7.48023	7.8123	7.76545	7.65911	7.54792	7.50035	7.2447	7.6089	7.88018	8.64625
LOC100577340	#N/A	3.77799	3.86033	3.40289	2.82187	4.04604	2.82187	3.50899	3.25178	3.82045	3.63391	3.23819	3.79229	4.00212	3.79276	2.82187
LOC100577341	GB49234	7.66048	7.55668	7.65969	7.77919	7.14651	8.444	7.42273	8.27025	7.30696	6.99107	7.00872	6.98508	7.30045	8.30127	2.82187
LOC100577342	GB53235	4.29641	4.19318	2.82187	4.40866	3.33407	5.3979	4.37282	4.50407	4.27104	4.19463	4.57945	4.98468	5.05627	4.44797	2.82187
LOC100577343	GB54256	7.67193	7.75384	7.72463	7.19103	7.92304	7.46704	9.4641	8.25239	7.80284	9.22456	8.00583	8.79501	7.59961	9.44919	9.16124
LOC100577344	GB45252	6.91675	6.86056	6.75267	7.1472	6.90692	7.77593	7.2316	7.32713	6.94261	7.18645	7.22479	7.23676	7.1995	7.44761	5.09416
LOC100577346	GB45440	9.05476	9.13174	9.55945	8.99404	8.96172	7.88403	9.41658	8.95979	9.8976	9.20782	7.98571	7.66105	8.47328	9.00846	9.04869
LOC100577347	GB54362	8.57743	8.48156	9.1273	8.64676	8.78738	7.37115	8.64887	7.96872	8.93636	8.9527	8.48096	8.74282	8.13096	7.49277	10.4172
LOC100577348	GB48233	3.98284	3.75456	3.8153	4.01182	4.04604	3.78146	3.65958	3.93565	4.07096	3.75558	3.64614	3.902	4.06966	2.82187	2.82187
LOC100577351	GB41903	6.3854	6.4807	6.90091	7.42307	7.27819	7.20621	6.8766	7.03795	6.58654	7.00841	6.97502	6.81399	7.13019	7.09594	6.28431
LOC100577358	GB42682	7.8336	7.64214	7.51111	6.94007	6.80563	6.39456	7.52244	7.13879	7.64392	7.275	6.60328	5.81857	6.78928	7.8937	5.81283
LOC100577359	#N/A	6.55663	6.40407	7.08564	6.46699	6.13279	5.48101	5.92407	5.43795	6.08081	6.16407	6.25426	6.63183	6.21174	5.02485	8.72161
LOC100577360	#N/A	5.76254	5.82938	6.33886	6.58159	6.41971	6.29293	6.19213	6.06958	6.46441	6.21004	6.68074	6.24341	6.60605	5.46073	7.83748
LOC100577362	GB41623	2.82187	3.29426	3.40289	3.83535	3.94466	3.50654	3.31001	4.63076	3.27554	2.82187	2.82187	3.31389	2.82187	2.82187	5.09416
LOC100577363	GB51764	6.48015	6.19219	5.98496	5.81114	5.77233	5.33953	6.22432	4.7816	6.46441	7.23876	6.3205	7.15487	6.14896	4.73746	7.96709
LOC100577364	GB43110	7.85887	7.42782	6.96965	7.28165	8.48039	5.87586	7.00187	6.55368	8.04176	7.47508	7.72343	7.92558	7.71157	6.67694	9.21438
LOC100577365	GB55332	5.84701	5.96099	5.98496	5.60707	5.59187	4.79468	5.54149	5.6388	5.67906	5.85151	5.32806	5.90228	5.21654	5.12411	5.09416
LOC100577367	GB54751	8.11095	8.0448	7.49258	8.08392	7.94959	7.99839	8.0929	7.67447	8.2024	8.01404	8.28363	8.02099	8.2661	8.23909	8.48256
LOC100577369	GB53239	8.52791	8.60009	8.26713	8.45975	8.2775	8.78124	8.49065	8.54414	8.37784	8.29693	8.36116	8.29352	8.2661	8.58153	6.63751
LOC100577373	GB45439	4.99547	5.22022	6.16116	5.41893	5.17698	4.65152	5.68882	5.6009	5.412	5.34006	4.41132	4.44723	4.53888	5.21647	5.09416
LOC100577376	GB44647	8.54357	8.27254	8.53929	8.53523	8.50565	6.82644	7.81754	7.61045	8.47255	8.41509	8.13019	8.62635	8.22747	6.28137	10.2491
LOC100577377	#N/A	7.72237	7.89046	6.99625	7.92887	7.77057	5.87586	7.0562	6.17543	8.09111	7.40491	7.21905	7.04999	6.62455	6.36195	7.53695
LOC100577378	GB46657	8.43694	8.44402	8.87918	8.98786	8.29416	8.62691	8.26	8.88454	8.57748	8.63141	8.1871	8.16995	8.30942	8.6745	7.35931
LOC100577380	#N/A	9.22558	9.31964	9.41706	9.02256	9.18356	9.46044	9.12711	9.14853	9.08238	9.38206	9.10804	9.67874	9.30052	8.76919	10.4397
LOC100577381	GB40606	6.65262	6.51752	7.18141	7.13976	6.91774	6.847	6.19213	6.76236	6.12566	6.43284	6.66389	7.02253	6.98778	6.36195	6.92042
LOC100577382	GB43867	3.65356	3.48702	3.8153	3.61319	3.83097	3.98699	3.78484	4.14006	4.07096	3.75558	3.97273	3.902	4.45012	3.61945	2.82187
LOC100577383	#N/A	3.50401	3.63301	3.63819	3.73194	3.70007	2.82187	3.65958	2.82187	3.60138	3.63391	3.40863	3.31389	3.66773	2.82187	2.82187
LOC100577384	#N/A	4.22632	4.60434	3.63819	3.83535	4.62813	4.07505	3.99103	4.31072	4.49145	4.26337	4.15906	4.24651	4.06966	3.61945	2.82187
LOC100577385	#N/A	7.13968	6.87006	8.46052	7.49472	8.03635	5.74892	6.72818	7.25712	7.67415	7.93483	7.46685	7.49142	7.70293	5.46073	10.3236
LOC100577386	GB41488	6.83741	6.89819	6.84344	6.83334	6.73389	7.2684	6.94541	7.02396	7.13632	6.94678	7.1841	6.88693	7.21784	7.38191	5.81283
LOC100577387	GB41619	4.22632	3.63301	4.20153	4.08921	4.04604	3.30825	4.236	4.25676	3.82045	3.48776	3.90178	4.44723	4.13295	3.61945	2.82187
LOC100577390	GB42334	6.05604	6.16139	5.8141	5.75299	6.22336	6.11689	7.15903	6.2975	6.44103	6.76479	6.50251	6.927	6.14896	7.03611	6.92042
LOC100577393	GB54477	9.56472	9.4421	9.48651	9.48462	9.42576	8.97516	9.83457	9.67601	10.0251	10.02	9.22702	10.0806	9.27599	9.68892	10.7407
LOC100577394	GB50186	6.94541	7.00548	6.40015	6.99884	6.59221	7.68205	7.30815	7.0449	7.09961	7.275	7.43254	7.22878	7.67226	7.29276	5.09416
LOC100577396	GB42028	4.59393	4.04072	4.20153	3.83535	4.44295	3.89004	4.55158	4.50407	4.49145	4.65475	4.26697	3.99992	4.45012	4.80033	6.63751
LOC100577397	#N/A	9.77955	9.67729	9.7929	9.81552	9.65742	9.07621	9.46743	9.18974	9.8108	10.0856	9.83154	10.3309	9.65515	8.80181	12.0663
LOC100577398	#N/A	4.07062	3.95483	4.20153	4.08921	4.44295	4.07505	4.65744	4.07647	3.99458	4.91236	3.74043	3.5144	4.5809	3.38939	2.82187
LOC100577399	GB40710	4.83245	4.87089	3.63819	4.35173	4.22255	3.98699	3.99103	3.25178	3.91163	3.86146	3.82486	3.66611	3.66773	3.79276	2.82187
LOC100577401	GB48416	9.98839	10.0557	9.56389	9.54765	9.68294	9.82678	10.0003	9.63183	10.0844	9.78825	9.78769	9.62209	9.78762	10.0214	9.4093
LOC100577404	#N/A	3.65356	3.29426	3.8153	2.82187	3.70007	2.82187	2.82187	3.42764	3.27554	3.29479	2.82187	3.31389	3.4242	3.61945	2.82187
LOC100577405	GB45756	4.07062	4.04072	2.82187	4.01182	4.04604	4.48946	3.89378	4.14006	3.99458	3.63391	4.65544	4.50704	4.35407	4.06067	2.82187
LOC100577406	#N/A	3.77799	4.11976	4.20153	3.92777	3.33407	4.74875	3.89378	4.45867	4.38654	4.26337	4.26697	3.99992	4.13295	4.17125	2.82187
LOC100577407	#N/A	6.28389	6.26639	5.72016	5.95531	5.7963	5.91574	6.20832	5.71162	5.95371	5.79192	5.85158	5.6588	6.0284	5.87608	5.09416
LOC100577408	GB54541	7.3398	7.27916	7.79435	7.7744	8.16876	8.45071	7.72574	8.50195	7.66414	8.09723	7.92712	8.04842	8.38695	7.85965	6.92042
LOC100577409	GB42865	10.4904	10.4794	10.588	10.4675	10.617	10.6637	10.5553	10.1841	10.5584	10.6537	10.7446	11.1258	10.9626	10.2328	10.2744
LOC100577410	GB46747	4.91653	4.74469	4.56389	4.78649	4.30093	5.27855	4.84536	4.41143	4.67706	4.87289	4.76132	4.17062	4.69891	4.67126	2.82187
LOC100577411	#N/A	3.65356	3.63301	3.40289	2.82187	2.82187	3.30825	3.50899	3.6725	4.07096	3.63391	3.74043	3.5144	3.4242	3.38939	2.82187
LOC100577414	#N/A	4.91653	4.55375	4.20153	4.51477	4.30093	5.36903	5.31674	4.81664	5.04765	4.95065	5.4934	5.02391	5.31364	5.53332	2.82187
LOC100577415	GB55334	7.50906	7.50286	7.49258	6.99059	7.19176	6.47624	7.22372	6.53401	7.61823	7.08393	6.9335	6.29048	6.68747	6.17374	8.29787
LOC100577418	GB46170	5.36136	5.39293	4.84156	5.2586	4.7889	5.77089	5.25423	5.37148	4.7603	4.7901	5.70922	5.39287	5.13881	5.46073	5.09416
LOC100577422	#N/A	3.50401	3.48702	4.08877	4.29179	3.83097	3.50654	3.99103	4.36219	3.99458	3.86146	3.74043	4.44723	3.4242	3.93632	5.09416
LOC100577423	GB50965	7.04583	6.73096	6.85803	6.60345	6.56487	6.69647	6.77218	6.35481	6.65915	6.76479	6.21994	5.86105	6.19941	6.99898	5.81283
LOC100577424	GB48062	10.3309	10.2015	9.21175	9.83288	9.85837	8.89627	9.90636	7.13229	10.9151	10.5049	9.65605	10.065	9.47038	9.29735	11.7164
LOC100577425	GB46480	5.57648	5.61686	5.75218	4.90302	5.44684	5.24699	5.82202	5.86275	5.48378	5.47407	5.45391	5.20427	5.76796	5.84818	2.82187
LOC100577428	#N/A	4.99547	4.91033	4.90237	4.65811	5.21382	4.59987	4.80094	5.25292	5.31001	5.19136	5.11418	5.02391	4.90599	4.80033	5.81283
LOC100577430	GB43784	6.78549	6.90744	6.72109	6.91412	6.37311	7.9471	7.11708	7.30994	6.51004	6.94678	7.33507	7.51129	7.41078	7.38191	5.09416
LOC100577431	GB43547	3.50401	3.63301	3.63819	3.28253	3.94466	3.30825	3.50899	3.25178	3.71846	3.29479	3.40863	3.5144	3.24932	2.82187	2.82187
LOC100577432	#N/A	4.83245	3.95483	4.48338	4.74514	4.93151	3.98699	4.07936	3.93565	4.91196	5.77147	4.79471	5.13504	4.13295	3.79276	6.92042
LOC100577436	GB56013	4.42467	4.50093	3.8153	3.73194	4.04604	4.43016	3.78484	3.56114	3.82045	3.29479	3.97273	3.902	3.92953	2.82187	2.82187
LOC100577437	#N/A	3.77799	3.29426	3.63819	3.28253	3.70007	3.65661	4.30651	3.56114	3.82045	3.86146	4.15906	3.79229	4.13295	3.79276	5.09416
LOC100577440	GB42823	3.88621	3.95483	4.08877	4.22842	4.04604	4.30153	3.99103	3.7696	4.14197	4.74659	4.10068	3.902	4.2491	4.60131	2.82187
LOC100577441	GB43368	3.65356	3.29426	3.96189	3.28253	3.70007	3.30825	3.99103	4.07647	3.27554	3.48776	3.82486	3.79229	3.76433	2.82187	2.82187
LOC100577444	GB43862	3.30644	3.48702	3.96189	4.56446	3.33407	3.65661	4.07936	3.42764	3.46087	3.63391	3.82486	3.99992	3.76433	2.82187	5.81283
LOC100577449	GB43104	7.28861	7.5449	7.35569	7.08659	7.15567	7.85902	7.73685	7.79042	7.58679	7.36514	7.37176	7.22878	7.43187	7.95947	2.82187
LOC100577450	GB54919	6.5061	6.64495	6.31783	6.60345	6.38881	7.69907	6.68278	6.89912	6.21132	6.50814	6.83166	6.47813	6.89197	7.36257	2.82187
LOC100577451	GB54746	6.46699	6.67781	7.48322	7.03939	6.65836	7.7047	6.81487	7.41546	6.35606	7.15568	7.08652	6.78156	7.64995	7.37227	6.63751
LOC100577452	GB40415	7.09778	6.93485	7.15806	7.03939	7.01165	7.50626	7.1424	6.98836	6.33082	7.05085	7.01537	7.15487	7.02993	7.01146	6.28431
LOC100577453	#N/A	3.30644	2.82187	3.96189	2.82187	3.33407	2.82187	3.78484	2.82187	3.27554	3.29479	2.82187	3.31389	3.4242	3.38939	2.82187
LOC100577454	GB53192	8.39958	8.37586	7.81686	8.01661	7.98081	8.61501	8.57966	8.35076	8.38395	8.2685	8.07412	8.03019	8.18469	9.05431	6.63751
LOC100577455	#N/A	7.21215	7.40191	6.62192	6.94861	6.96024	7.41303	8.20908	6.70201	7.16502	8.11729	7.63572	7.74731	6.83759	7.97227	6.92042
LOC100577456	GB45073	12.6672	12.2117	13.1394	12.4645	13.0718	10.6107	11.9984	11.6308	13.1263	12.7113	12.4136	13.0225	12.7129	10.499	15.9851
LOC100577464	GB50530	3.98284	3.95483	3.8153	3.73194	4.04604	3.50654	3.50899	3.6725	4.20844	3.86146	3.74043	3.902	3.85079	4.06067	2.82187
LOC100577466	GB48424	7.54064	7.71756	7.46432	7.68538	7.39108	8.70192	8.11859	8.27025	7.81193	8.13709	8.08362	7.73047	8.05493	8.42279	2.82187
LOC100577468	#N/A	3.65356	3.95483	3.8153	3.73194	3.94466	2.82187	3.50899	3.6725	3.71846	4.12114	3.64614	2.82187	3.24932	3.79276	2.82187
LOC100577472	GB45757	5.23956	4.94861	4.90237	5.20064	5.56406	4.70109	5.18868	4.63076	5.04765	4.87289	5.45391	5.6344	5.40423	4.86023	6.63751
LOC100577473	#N/A	6.5061	6.50535	5.75218	6.13213	6.03601	7.69342	6.79368	7.03795	6.14031	6.69145	7.55604	6.63183	7.55227	6.26049	2.82187
LOC100577474	#N/A	4.64544	4.32651	4.08877	3.83535	3.83097	3.50654	3.78484	3.93565	3.91163	3.95605	3.90178	3.66611	4.00212	3.61945	2.82187
LOC100577476	#N/A	4.07062	3.95483	4.20153	4.61218	8.57545	3.30825	4.37282	8.50949	4.33027	4.12114	8.76483	3.5144	8.6985	3.93632	2.82187
LOC100577480	GB48663	6.78549	6.83168	7.63456	6.22	6.22336	8.23835	5.90424	7.36089	5.59566	6.49587	7.35615	7.0409	7.65892	6.88143	5.81283
LOC100577481	GB48996	9.87172	9.96143	9.63733	9.33347	9.48317	8.98443	9.86017	9.37983	10.0222	9.55818	8.98173	8.41438	9.32464	10.169	8.08599
LOC100577484	#N/A	3.50401	3.29426	3.40289	3.47063	3.33407	3.30825	2.82187	3.25178	3.46087	3.63391	3.40863	3.902	3.55697	2.82187	2.82187
LOC100577487	#N/A	3.98284	3.63301	4.08877	3.92777	4.30093	4.23122	3.78484	3.93565	4.49145	4.65475	4.26697	3.66611	4.2491	3.79276	2.82187
LOC100577488	GB40409	3.98284	4.19318	4.48338	4.51477	3.83097	4.43016	4.49496	5.00887	3.91163	4.19463	3.82486	4.38418	4.06966	3.93632	2.82187
LOC100577491	GB46074	7.91294	8.00666	8.03092	7.96713	7.82894	8.33581	8.22494	8.1692	8.12067	8.17204	7.69065	7.55022	7.78301	8.33634	7.35931
LOC100577492	GB50405	4.42467	4.50093	4.56389	4.16112	5.05995	3.50654	3.78484	3.7696	4.7603	4.04203	4.65544	5.062	4.19261	2.82187	2.82187
LOC100577493	GB52619	8.16865	8.14573	8.14203	7.85823	8.11818	7.4604	8.0356	7.64282	8.10597	7.8558	7.41256	7.38057	7.69859	8.20696	8.08599
LOC100577494	#N/A	7.44373	7.30036	7.18141	6.58159	7.34378	6.56597	6.58742	6.3771	7.43024	7.26061	7.16032	6.84571	6.94435	5.69964	8.86146
LOC100577496	GB49792	6.65262	6.39088	6.25279	5.84859	6.18783	5.42616	6.10831	5.92502	5.95371	5.85151	5.80572	5.53225	5.68112	5.9566	6.28431
LOC100577497	GB52996	3.65356	3.75456	4.96044	4.22842	4.73758	4.23122	4.55158	5.6388	4.38654	4.5555	4.15906	4.38418	4.19261	4.60131	5.09416
LOC100577498	GB48167	11.5783	11.4197	11.6669	11.7415	11.5739	10.598	11.0577	10.7541	11.7248	11.7295	11.2137	11.6857	11.1737	10.6579	13.5142
LOC100577499	GB46441	5.47313	5.41969	5.75218	5.49253	5.53568	5.95451	6.14244	5.94016	5.59566	5.83192	5.77429	5.33288	5.97133	6.26049	2.82187
LOC100577501	GB51589	7.72237	7.68034	7.77149	7.44132	7.78833	8.0301	7.60966	7.37197	7.6337	7.46258	7.58755	7.17162	7.77479	7.8937	7.35931
LOC100577504	GB46630	9.71605	9.2065	11.0052	9.76457	10.5265	6.66204	8.82042	8.58987	10.161	10.216	9.63576	10.6229	9.71112	6.54545	13.604
LOC100577506	GB43639	9.02385	9.13763	9.28079	8.88065	8.62239	8.97516	9.34766	9.23286	9.32531	8.89112	8.48335	8.29734	8.58324	9.79893	6.92042
LOC100577507	GB49237	3.50401	3.95483	4.48338	3.92777	6.01583	4.07505	4.84536	5.94016	3.82045	4.5555	7.21905	3.5144	7.02299	3.38939	2.82187
LOC100577513	GB41202	5.36136	5.05711	5.54792	5.04365	4.73758	4.59987	4.236	4.45867	5.14095	4.83217	4.97859	5.02391	4.87373	4.17125	5.81283
LOC100577515	GB54745	5.36136	5.66204	6.08833	6.17675	5.77233	5.3979	5.77902	5.48054	5.77673	6.06739	5.82118	6.24341	6.04232	5.17109	7.35931
LOC100577516	GB45983	3.65356	4.04072	4.39697	3.73194	4.04604	3.98699	3.99103	4.31072	3.71846	4.12114	3.82486	4.08885	4.13295	3.61945	5.09416
LOC100577517	#N/A	9.89142	9.83664	9.65408	9.07603	10.1433	9.69317	10.0378	9.70473	10.0693	9.60864	9.95475	9.90429	9.92666	10.1094	10.8787
LOC100577519	GB51720	8.05959	8.08195	8.08136	7.92455	7.82894	8.25761	8.27531	8.36468	8.40811	8.1292	7.90229	7.56929	8.01011	8.70931	5.09416
LOC100577520	GB43124	7.66048	7.81398	7.38614	7.71066	7.5523	8.54777	7.73685	7.84706	7.72797	7.73107	7.54691	7.56296	7.51325	7.83182	6.28431
LOC100577521	GB47429	4.07062	4.38763	4.90237	4.40866	4.68406	4.43016	4.65744	4.5478	5.04765	4.12114	4.03877	4.44723	4.4031	5.26036	2.82187
LOC100577522	GB55312	7.31077	7.13709	6.95616	6.22	6.85153	5.99225	6.49841	5.90971	7.03108	7.017	7.13003	7.22075	6.92214	6.70801	9.16124
LOC100577523	GB40249	2.82187	3.29426	2.82187	2.82187	2.82187	3.30825	2.82187	2.82187	3.60138	2.82187	3.23819	2.82187	3.66773	2.82187	5.09416
LOC100577524	GB43759	3.77799	3.48702	3.40289	3.73194	3.70007	2.82187	3.31001	3.42764	2.82187	3.29479	3.64614	4.08885	4.00212	2.82187	2.82187
LOC100577525	GB51525	7.57765	7.85273	7.52029	7.95871	7.80005	8.48706	7.86387	8.09098	7.54922	7.83655	8.27537	7.93051	8.18158	8.16856	5.09416
LOC100577527	GB50477	6.09093	6.19219	8.79482	7.91153	7.78833	6.50246	6.27127	10.0759	5.67906	5.64209	5.56915	6.46455	6.81364	5.76097	8.39317
LOC100577530	GB49794	8.92929	8.81875	8.14203	8.04867	8.37861	8.48706	8.80205	8.65925	9.22349	9.41807	8.85997	9.139	8.82127	8.81607	10.6853
LOC100577533	GB51602	7.68894	7.68034	7.8094	8.02065	7.79421	8.25378	7.62768	8.13712	7.66915	7.68877	7.83639	7.3588	7.61352	7.90041	6.92042
LOC100577537	GB46629	3.98284	4.44565	4.39697	4.35173	3.94466	3.89004	4.65744	3.42764	4.27104	4.65475	4.26697	4.50704	4.00212	3.93632	5.09416
LOC100577538	#N/A	3.98284	4.69965	4.56389	4.16112	3.70007	3.98699	4.1606	4.25676	4.20844	4.26337	4.31717	4.17062	4.53888	4.73746	2.82187
LOC100577539	#N/A	5.98357	5.97882	5.84407	6.11694	5.74794	6.48941	6.17576	6.1497	5.86802	5.96359	5.70922	5.77476	5.84971	6.19593	5.81283
LOC100577541	GB53776	4.29641	4.32651	4.08877	3.47063	4.50792	4.07505	5.00912	4.25676	4.27104	3.95605	4.21436	3.79229	4.2491	5.4975	2.82187
LOC100577542	#N/A	6.41312	6.031	6.43959	4.56446	4.97574	4.07505	5.56717	4.07647	6.3931	5.66451	5.64095	4.17062	5.05627	5.30287	5.81283
LOC100577543	GB40142	4.36235	4.55375	4.20153	4.65811	4.7889	4.54594	4.55158	4.0086	4.49145	4.98786	4.69174	4.85934	4.5809	3.93632	6.28431
LOC100577544	#N/A	4.29641	3.75456	4.48338	4.08921	4.44295	3.30825	3.99103	3.93565	4.14197	4.19463	3.53808	3.79229	4.13295	3.38939	5.09416
LOC100577546	GB41849	8.29984	8.53015	7.96529	8.14822	8.02641	8.62394	8.64887	8.19123	8.2699	8.48161	8.39714	8.30114	8.22446	8.72451	6.28431
LOC100577547	GB40979	4.69488	4.19318	5.06936	4.86535	5.05995	3.65661	3.99103	4.14006	4.63324	3.95605	4.45565	4.17062	4.2491	3.61945	5.09416
LOC100577548	GB44075	4.64544	4.32651	6.43959	6.08607	6.34117	4.59987	4.65744	5.20242	4.79994	5.09351	5.74214	6.60734	6.47959	4.5271	8.64625
LOC100577551	GB50247	8.347	8.49386	9.10615	8.54087	9.09602	7.83356	8.74271	8.20057	9.12491	8.87942	8.49999	8.25088	8.66555	7.97227	10.4618
LOC100577552	GB48567	7.27364	7.11332	6.79878	6.69786	7.13729	6.04702	6.44493	5.95514	6.82149	6.78508	6.68909	6.9071	6.89957	6.03276	8.64625
LOC100577553	GB44012	7.28861	7.19863	7.03524	7.41694	6.90692	7.48678	7.56671	7.46286	7.20011	7.16343	7.11774	6.91709	7.32883	7.88695	5.81283
LOC100577556	#N/A	3.50401	3.48702	3.63819	3.47063	3.33407	3.65661	4.1606	3.7696	3.46087	3.75558	3.90178	3.79229	3.85079	3.79276	2.82187
LOC100577558	GB46199	5.33192	4.78817	5.93029	5.39349	5.77233	3.89004	4.65744	4.45867	4.98157	5.64209	5.58745	5.30186	5.11187	4.17125	6.92042
LOC100577561	GB42689	5.44603	5.68409	5.06936	5.90297	5.4771	6.23142	5.90424	5.43795	5.79547	5.66451	5.30591	5.92245	5.92695	5.81971	2.82187
LOC100577562	GB50442	8.11515	7.77921	8.51198	7.90716	8.36685	7.83869	8.15216	7.69225	8.65777	8.62302	8.51176	8.74002	8.38965	7.94655	10.9588
LOC100577565	#N/A	3.65356	3.48702	3.40289	4.16112	3.70007	2.82187	3.89378	3.42764	3.91163	3.75558	4.15906	3.66611	3.92953	3.93632	2.82187
LOC100577566	#N/A	6.10805	6.41713	6.31783	6.14716	6.15137	6.79504	6.68278	6.49383	6.3931	6.38033	6.4834	6.09204	6.53935	6.61271	5.09416
LOC100577569	GB48269	4.29641	3.86033	3.8153	4.16112	4.73758	3.30825	4.236	3.25178	4.54059	4.32807	4.45565	4.44723	4.13295	3.61945	5.09416
LOC100577571	#N/A	4.15136	4.19318	4.56389	4.16112	4.04604	3.78146	5.84303	4.63076	3.99458	5.90866	4.57945	3.5144	4.93747	4.60131	2.82187
LOC100577573	GB50907	4.29641	3.63301	3.63819	3.47063	4.13804	3.78146	3.78484	3.25178	3.27554	4.60614	3.40863	3.31389	3.92953	2.82187	2.82187
LOC100577574	GB53811	7.49623	7.7123	7.11019	7.66482	7.68466	8.00296	7.48338	7.71851	7.22076	7.3584	7.56058	7.67286	7.49333	7.93352	6.63751
LOC100577575	GB48064	8.82555	8.86683	8.83945	9.14621	8.82798	9.34458	8.93569	9.21761	8.8596	8.93246	8.85997	8.71742	8.76845	9.12476	8.29787
LOC100577576	GB41270	9.91086	9.77499	8.60108	8.32553	8.08505	9.0119	9.90267	7.67893	11.0816	11.1933	9.10804	9.616	8.76015	8.85459	11.8567
LOC100577578	GB48836	9.06998	9.12187	9.43171	9.01852	9.18802	9.03663	10.0567	9.87669	8.93429	9.99206	9.63898	10.3309	9.20439	9.91611	10.0295
LOC100577579	GB40876	6.35713	6.17688	6.47797	6.61425	6.32492	6.96451	6.34623	6.91439	6.05009	6.05061	6.13647	5.83997	5.97133	6.72329	5.09416
LOC100577580	GB47162	7.14792	7.26485	7.28203	7.13976	7.24424	7.57549	7.15074	7.44723	7.15074	7.20159	7.20749	7.00393	7.50829	7.59569	5.81283
LOC100577582	GB40391	7.9416	8.1062	8.23407	8.39576	8.04622	8.61202	8.1563	8.43758	7.71833	8.01832	8.17826	8.20286	8.08848	7.99754	6.92042
LOC100577584	GB46765	4.83245	4.60434	5.35102	4.56446	4.73758	3.30825	4.37282	4.36219	4.5878	4.98786	4.61804	4.90249	4.4031	3.93632	7.35931
LOC100577585	GB40821	3.50401	2.82187	3.40289	3.47063	3.54253	2.82187	3.89378	3.25178	2.82187	2.82187	2.82187	3.31389	3.24932	3.38939	2.82187
LOC100577587	GB43839	10.9703	10.9512	11.5792	11.5236	11.4728	11.6559	11.2247	11.3905	10.8114	10.9902	11.4035	11.6365	11.9913	11.3565	11.9379
LOC100577593	GB47467	7.74964	7.82377	7.86806	7.85823	7.97048	7.62383	7.95229	8.0259	7.98262	7.63964	7.86237	6.99453	7.56187	8.10023	7.53695
LOC100577594	GB52674	8.12351	7.94077	8.19452	8.37062	7.98595	7.85396	8.0175	7.98683	8.01052	8.17587	8.37411	8.00707	8.15015	7.66044	8.64625
LOC100577596	GB51781	2.82187	3.29426	2.82187	2.82187	3.33407	2.82187	3.31001	3.25178	3.27554	2.82187	3.53808	3.5144	2.82187	2.82187	2.82187
LOC100577598	GB50766	8.68581	8.53908	8.48881	7.68026	7.57295	8.38568	8.89416	7.52869	8.59864	9.01817	7.97214	7.62505	8.40304	6.93487	8.79323
LOC100577600	GB54546	6.20666	5.97882	4.96044	5.17069	6.47956	5.24699	5.68882	5.48054	6.27895	5.85151	5.86654	6.56979	5.8655	6.38141	5.81283
LOC100577602	GB52650	8.18071	8.06556	7.4738	8.17025	7.89053	8.40308	8.02204	8.23734	8.10966	8.09318	8.29458	8.19879	8.22747	8.594	6.28431
LOC100577603	#N/A	5.39017	5.05711	6.01152	5.34113	6.07552	5.14762	6.07334	6.50398	5.83221	6.35333	6.3205	6.98508	6.67865	5.69964	8.19582
LOC100577605	GB49763	3.30644	3.29426	2.82187	3.47063	3.70007	3.30825	3.31001	3.25178	3.27554	3.29479	3.23819	3.5144	3.55697	3.61945	2.82187
LOC100577606	GB55365	7.43703	7.59148	7.29279	7.39837	7.24424	7.98458	7.71454	7.43672	7.38219	7.47508	7.0802	7.20456	7.02993	7.93352	5.09416
LOC100577607	GB55965	7.40991	7.27202	7.76378	7.55182	7.34378	8.0166	7.94273	8.11094	7.6026	7.38516	7.49562	7.22878	7.27149	7.79626	5.09416
LOC100577610	GB54329	8.733	8.69903	8.27256	8.61767	8.83369	8.33581	8.78075	8.44546	8.97326	8.70749	8.44458	8.06194	8.59962	8.87176	5.09416
LOC100577614	GB49581	4.42467	4.19318	5.39273	4.16112	4.22255	3.78146	3.78484	4.36219	4.33027	4.12114	4.15906	4.38418	4.2491	3.61945	6.92042
LOC100577620	#N/A	6.49318	6.33689	6.31783	5.82999	5.84305	5.65738	5.77902	5.48054	6.45277	6.36689	5.67551	5.86105	6.00015	5.66794	7.83748
LOC100577622	GB46335	2.82187	2.82187	2.82187	3.92777	3.54253	2.82187	3.50899	3.56114	3.71846	3.29479	3.23819	3.5144	3.4242	2.82187	2.82187
LOC100577623	#N/A	11.4906	11.529	11.4151	11.2455	11.3876	10.9659	11.683	11.3474	11.4172	11.3713	11.3876	10.7417	11.4306	11.904	9.4977
LOC100577629	GB54483	6.42678	6.52959	6.72109	6.31606	5.97459	6.26251	6.47192	6.53401	6.46441	6.87296	6.06078	6.24341	5.88112	6.21778	6.92042
LOC100577632	GB41728	5.76254	5.30933	5.8734	5.20064	5.13911	4.92327	6.52441	5.3253	6.36851	6.2691	5.67551	6.19473	5.91183	5.81971	8.29787
LOC100577635	GB55654	5.49971	5.76896	5.16998	5.22993	6.11396	4.96343	5.48867	4.91632	5.50689	5.47407	5.77429	6.36561	5.44737	6.10501	2.82187
LOC100577636	GB53527	8.15648	7.85273	7.74825	7.21246	8.03635	6.94558	7.38083	6.94443	8.52597	7.79229	7.37176	7.60053	7.47821	8.07672	8.92661
LOC100577638	GB49123	8.83576	8.70433	9.20324	8.84459	9.01041	9.11473	9.00389	8.95612	8.60388	8.70218	9.20254	9.82857	9.31476	8.356	9.93768
LOC100577640	GB54665	6.82718	6.6886	6.33886	6.38091	6.37311	6.76293	6.82534	6.78746	6.90904	6.84426	6.64683	6.22737	6.73077	7.21939	2.82187
LOC100577641	GB43581	7.15611	6.9706	7.88235	7.42918	7.01165	6.95508	7.57293	7.46286	6.81244	7.8317	6.62086	6.94662	6.72222	6.38141	6.92042
LOC100577643	#N/A	8.94588	9.02774	9.02153	9.34481	8.8758	10.2291	9.5101	9.51819	9.0269	9.60012	9.51935	9.71198	9.4931	9.31252	6.63751
LOC100577644	GB45122	7.95102	8.1261	8.1656	8.64676	7.846	8.85641	8.37105	8.6087	8.19548	8.22847	8.2587	8.25872	8.08848	8.60226	2.82187
LOC100577646	#N/A	3.65356	3.63301	2.82187	4.74514	4.22255	3.30825	4.55158	3.7696	4.33027	3.95605	3.82486	4.50704	4.80667	3.79276	5.09416
LOC100577647	GB42363	3.98284	4.26187	4.20153	4.40866	4.30093	3.89004	4.30651	3.42764	4.07096	4.19463	3.90178	3.79229	3.85079	4.17125	2.82187
LOC100577648	GB51581	7.89839	7.93175	7.945	7.97131	7.78244	8.8076	8.17275	8.3702	7.86529	7.94385	8.01909	7.83396	8.00309	8.73581	6.63751
LOC100577649	GB46971	6.58124	6.58843	6.65575	6.71802	6.82876	7.20621	7.1998	6.77078	6.99954	7.03403	7.34565	6.80326	7.32883	7.62843	5.09416
LOC100577651	GB46639	7.89351	7.83832	7.74042	7.73551	7.53836	8.88641	7.88898	8.31394	7.53281	7.68339	7.64002	7.9403	7.5714	8.40873	5.09416
LOC100577655	#N/A	2.82187	3.29426	3.40289	3.47063	2.82187	2.82187	2.82187	3.6725	2.82187	3.29479	3.23819	2.82187	3.4242	3.61945	5.09416
LOC100577656	GB50040	5.67262	5.63963	5.65381	5.71284	5.7963	5.14762	6.37513	5.65736	6.25228	6.16407	5.86654	6.39459	5.97133	5.76097	7.15657
LOC100577658	#N/A	3.77799	3.86033	3.96189	3.83535	3.54253	4.92327	4.60566	4.0086	3.91163	3.86146	4.21436	3.99992	4.35407	4.5271	2.82187
LOC100577661	GB55427	8.21241	8.31476	8.27798	8.59343	8.23929	8.64749	8.29422	8.68165	8.12432	8.21364	8.34808	8.1532	8.20624	8.53485	7.15657
LOC100577663	#N/A	3.50401	3.29426	2.82187	3.83535	3.54253	3.30825	2.82187	2.82187	3.60138	3.29479	2.82187	2.82187	2.82187	2.82187	2.82187
LOC100577667	#N/A	6.02027	5.82938	5.78349	4.70239	5.56406	4.70109	5.28584	4.91632	6.03448	5.42203	4.88993	4.85934	4.99821	4.67126	5.09416
LOC100577669	GB41471	8.8882	8.61706	9.64364	9.13879	9.63635	7.52547	8.27531	9.03306	9.00727	8.86526	8.8433	9.39	9.07988	7.66833	11.0198
LOC100577670	#N/A	5.06992	5.25058	5.39273	5.31418	4.7889	3.89004	5.25423	4.70846	5.36196	5.59613	5.11418	5.13504	5.05627	3.61945	7.15657
LOC100577672	GB50960	8.23959	8.33883	8.06892	7.94173	8.03139	8.06551	8.2328	7.96872	8.30893	8.16048	8.08992	7.64915	8.13418	8.33138	7.69504
LOC100577673	GB51963	8.86097	9.06737	8.99219	9.39709	8.98242	10.2533	10.3183	10.5162	9.27201	10.3423	10.2562	9.85856	9.69597	10.7992	7.35931
LOC100577675	GB41233	8.1887	8.24369	8.61826	7.78871	8.12751	9.01417	8.33132	9.00313	8.21616	8.35215	8.87462	8.68576	9.33026	8.16856	7.83748
LOC100577676	GB51685	5.69565	6.04797	5.98496	6.03844	5.7963	6.63862	6.95498	6.4836	6.40524	6.25457	5.85158	6.00035	6.22397	7.2086	5.81283
LOC100577678	GB51888	3.65356	3.95483	6.38001	3.73194	4.22255	4.07505	4.1606	3.85651	3.82045	5.34006	4.41132	4.08885	6.51971	4.36308	2.82187
LOC100577679	GB46206	6.76419	6.61131	6.53367	6.22	6.47956	6.46295	6.61187	6.85233	6.38086	6.52032	6.16082	5.79684	6.68747	6.67694	2.82187
LOC100577680	GB51419	5.84701	5.90609	4.30354	4.74514	4.22255	5.42616	6.03748	4.14006	7.00749	6.45839	4.65544	4.76843	4.06966	4.17125	5.81283
LOC100577681	GB46897	6.20666	6.11389	5.65381	6.32927	6.09487	6.83675	6.43124	6.4099	6.18334	5.94552	6.23147	6.36561	6.51971	6.47486	2.82187
LOC100577682	GB43584	10.896	10.8442	10.3683	10.3111	10.2655	10.613	11.0916	10.2136	10.7448	11.0043	10.6219	10.3055	10.4676	11.144	10.0295
LOC100577687	GB45202	9.38003	9.33852	9.27539	8.85822	9.01041	7.84889	8.85139	8.41101	9.14481	8.72589	8.37926	8.30872	8.7434	8.17964	10.1158
LOC100577689	GB51608	7.34697	7.36885	7.27119	6.89656	7.15567	7.65904	7.27802	7.18353	7.13632	7.13216	7.04165	6.81399	7.05736	7.77449	2.82187
LOC100577690	GB55968	6.68701	6.8795	6.94255	6.58159	6.65836	7.27599	7.12557	6.99555	6.83049	6.78508	6.53998	6.89705	6.69624	7.37227	2.82187
LOC100577692	GB42180	5.03322	4.94861	5.12062	4.86535	5.28458	5.14762	5.71193	5.3253	5.61698	5.79192	5.18933	5.45033	5.02756	5.21647	6.63751
LOC100577693	#N/A	7.02809	7.38216	8.14203	7.34119	7.06128	6.81605	7.58527	8.58274	7.1579	7.43723	6.62957	5.98128	6.31819	8.02237	2.82187
LOC100577694	GB43772	5.71831	5.66204	5.51074	5.73306	5.7963	6.06481	6.10831	5.86275	5.73848	5.25282	5.64095	6.10968	5.71651	6.64519	5.09416
LOC100577695	#N/A	3.77799	4.26187	4.84156	4.56446	3.94466	2.82187	4.1606	4.31072	4.79994	4.32807	4.49836	4.24651	4.19261	4.60131	5.09416
LOC100577696	GB40147	4.64544	4.26187	3.96189	4.08921	5.17698	4.07505	4.55158	4.0086	4.94723	4.65475	4.57945	4.44723	4.19261	3.93632	2.82187
LOC100577697	GB47654	4.48382	4.11976	4.63936	4.93963	5.5067	3.65661	4.07936	4.0086	4.27104	4.74659	4.94971	5.27011	5.11187	3.61945	5.09416
LOC100577699	GB47304	8.56213	8.78912	8.92821	9.30556	8.77853	9.55528	8.61618	9.24795	8.37171	8.82436	8.69635	8.64742	8.63409	8.92538	7.96709
LOC100577702	GB44586	8.1442	8.29732	8.23407	8.48925	8.10879	8.55401	8.13966	8.61337	8.23655	8.20616	8.03876	7.49807	7.88584	8.33634	8.08599
LOC100577704	GB45494	4.78824	4.55375	5.21757	4.46291	4.62813	4.36766	5.28584	4.94791	5.36196	5.75073	4.97859	5.062	4.87373	4.44797	6.63751
LOC100577707	GB46274	11.8858	11.848	11.9981	11.2985	11.7204	10.636	11.9693	11.3407	12.2972	11.7614	11.4242	10.918	11.4241	11.6391	13.6553
LOC100577709	GB46701	9.57998	9.44527	9.3233	8.2517	9.24267	7.81287	9.44899	8.56839	10.419	9.89433	8.70663	8.76502	8.58794	8.53053	11.5712
LOC100577711	GB43837	6.45372	6.51752	6.25279	5.56239	5.91036	6.26251	6.49841	6.83639	5.93698	6.03363	6.36301	5.23759	5.92695	6.41953	2.82187
LOC100577712	GB48555	6.66417	6.73096	6.65575	6.99059	6.32492	7.17408	7.16728	6.58269	7.35755	7.26061	7.33507	7.05903	7.11069	7.11919	6.92042
LOC100577717	GB44460	5.23956	4.78817	4.84156	4.82653	5.77233	4.59987	5.75701	4.97874	5.33623	5.59613	5.08815	4.38418	5.50963	5.56822	6.63751
LOC100577718	#N/A	4.87518	4.44565	3.8153	4.86535	4.93151	5.33953	5.40541	5.50134	4.8757	5.42203	6.02135	5.70635	4.62151	4.91746	5.09416
LOC100577719	GB55357	9.18023	8.84299	7.99848	7.81226	8.07061	7.22202	9.05356	6.91439	10.0387	9.34681	8.50471	8.3607	7.64545	8.42279	11.5403
LOC100577721	#N/A	3.88621	3.86033	4.08877	3.28253	4.30093	3.30825	3.89378	3.25178	3.71846	4.44732	3.74043	3.79229	4.80667	3.93632	2.82187
LOC100577722	GB40494	5.14039	5.15735	5.26354	5.28668	5.35183	6.24705	5.75701	5.99915	5.73848	5.72967	5.58745	5.50548	5.62628	6.03276	2.82187
LOC100577723	#N/A	4.22632	3.48702	4.08877	4.16112	4.04604	3.89004	3.89378	3.6725	4.44018	4.83217	3.74043	4.76843	4.69891	3.93632	5.09416
LOC100577724	#N/A	6.65262	6.6886	6.79878	6.97395	6.79392	6.85717	6.57504	6.76236	6.54333	6.80508	6.98182	6.96598	6.87664	6.81171	6.28431
LOC100577725	GB50481	3.77799	4.11976	4.7777	4.01182	3.83097	4.30153	4.1606	4.85074	3.91163	3.86146	3.97273	3.66611	4.19261	3.79276	2.82187
LOC100577727	GB41774	5.64921	5.78939	5.30798	5.22993	5.05995	6.01074	5.73465	5.50134	5.83221	5.47407	5.03451	5.6588	5.42597	6.70801	2.82187
LOC100577730	#N/A	3.65356	3.63301	3.96189	3.92777	3.83097	3.50654	3.78484	3.42764	3.99458	3.48776	3.40863	2.82187	3.55697	3.93632	2.82187
LOC100577731	#N/A	4.59393	4.50093	4.20153	4.40866	4.62813	4.07505	4.43549	4.31072	4.14197	4.19463	4.10068	3.99992	4.2491	4.44797	5.81283
LOC100577737	#N/A	4.36235	4.26187	4.08877	4.16112	4.37415	4.07505	3.78484	3.7696	4.7603	4.26337	4.53959	3.79229	4.06966	4.36308	2.82187
LOC100577739	GB43771	8.02876	7.91354	7.61756	7.76477	7.73438	8.73252	8.16865	7.61977	8.17097	7.85101	8.47856	8.19471	8.6112	8.08263	5.81283
LOC100577740	#N/A	3.77799	4.11976	2.82187	2.82187	3.94466	4.07505	3.99103	3.85651	4.49145	3.48776	4.15906	3.66611	3.55697	4.5271	2.82187
LOC100577742	GB55539	6.85766	6.79224	6.47797	6.84255	6.78211	7.58162	6.81487	6.81214	6.63878	7.03403	7.0802	6.9071	7.18093	6.76818	6.28431
LOC100577743	#N/A	4.36235	4.44565	7.45478	4.82653	5.21382	4.36766	4.92983	4.45867	5.04765	5.70828	4.65544	4.61837	6.61533	4.67126	2.82187
LOC100577746	GB43834	7.80269	7.8951	7.92442	7.73551	7.93903	8.21883	8.16455	7.86284	7.83886	7.81705	7.72748	7.66697	7.82742	8.06482	6.28431
LOC100577748	GB50905	5.8874	5.68409	6.63893	5.65035	5.53568	6.029	5.46147	5.1229	5.33623	5.22244	5.5506	5.45033	5.81758	5.69964	5.81283
LOC100577749	GB49752	2.82187	2.82187	3.40289	2.82187	3.54253	3.30825	2.82187	3.25178	3.82045	2.82187	3.23819	3.31389	3.66773	3.61945	2.82187
LOC100577751	GB55663	3.98284	3.75456	3.96189	3.73194	4.50792	4.23122	4.43549	3.7696	3.82045	4.12114	4.10068	4.72039	3.92953	4.06067	2.82187
LOC100577752	GB44233	3.50401	3.86033	2.82187	3.73194	3.70007	3.50654	3.31001	3.7696	3.71846	3.29479	3.74043	3.79229	4.35407	3.61945	2.82187
LOC100577753	#N/A	8.05959	8.31822	8.45096	8.51816	8.57204	8.84373	8.51986	8.53678	7.89125	8.21364	8.76483	8.80844	8.79916	8.93848	6.28431
LOC100577754	GB47090	5.33192	5.30933	4.90237	3.92777	5.24966	4.74875	5.68882	5.41615	5.1997	4.7901	4.65544	4.38418	4.84064	5.81971	2.82187
LOC100577756	GB40495	5.7406	5.66204	5.58412	5.44391	5.5067	5.30939	5.92407	5.43795	5.50689	5.99904	5.37132	5.27011	5.40423	5.87608	5.09416
LOC100577758	GB48438	4.69488	4.44565	4.56389	4.78649	4.73758	5.27855	4.43549	4.81664	4.91196	4.83217	4.76132	5.45033	5.05627	4.80033	2.82187
LOC100577759	#N/A	5.69565	5.66204	6.27481	5.60707	6.07552	5.60924	6.5997	6.04183	5.97024	5.87082	6.03462	5.53225	6.10991	5.66794	6.28431
LOC100577763	GB48105	10.0663	10.0557	9.62888	9.50064	9.71112	9.39934	9.86017	9.41368	10.0464	9.72692	9.53096	8.99614	9.60042	10.0458	8.19582
LOC100577764	GB42970	8.83066	8.73315	8.94872	9.0426	8.9565	9.04331	8.87921	9.07258	8.717	9.0203	9.16429	9.42529	9.08985	8.58153	9.80539
LOC100577765	GB46508	5.10562	4.91033	4.90237	5.07657	4.30093	5.63352	5.31674	5.52184	4.8757	4.83217	4.72702	4.72039	4.87373	5.66794	2.82187
LOC100577766	GB48834	6.5189	6.52959	6.01152	6.65667	6.537	7.67059	7.01107	6.71079	6.66922	7.08393	7.21328	6.94662	6.98778	6.72329	6.28431
LOC100577767	#N/A	4.69488	4.26187	2.82187	3.47063	3.33407	2.82187	3.50899	4.67022	2.82187	3.63391	3.23819	2.82187	4.62151	3.61945	2.82187
LOC100577769	GB54303	7.3326	7.18349	7.60036	7.98381	8.72424	7.67059	7.28561	8.32821	7.6026	7.05085	7.51448	8.16995	7.71587	7.74495	8.48256
LOC100577770	#N/A	3.88621	2.82187	4.39697	3.92777	4.04604	3.50654	4.07936	3.42764	3.91163	4.12114	4.15906	3.902	3.85079	3.38939	2.82187
LOC100577771	GB55231	7.57765	7.5449	7.51111	7.32817	7.11866	6.70776	7.54791	7.17089	7.471	7.52405	7.04165	7.56296	7.31755	6.99898	7.83748
LOC100577772	GB48723	6.23805	6.26639	5.47252	4.65811	6.01583	4.96343	5.18868	4.5478	6.40524	5.05923	5.83646	6.01917	5.50963	5.42295	7.83748
LOC100577777	#N/A	5.62539	5.54619	6.18463	5.92063	5.4159	5.14762	5.28584	6.16263	5.85023	5.68657	5.34986	4.90249	5.58848	5.21647	5.09416
LOC100577778	GB42505	5.55136	5.52181	5.30798	5.31418	5.91036	4.43016	4.88829	4.67022	5.88558	5.70828	5.56915	5.83997	5.40423	4.73746	6.63751
LOC100577781	GB42523	8.9808	9.09387	8.68091	8.9093	8.71499	8.35023	8.46751	8.58274	9.196	9.67103	8.71683	8.46274	8.4057	9.21094	8.72161
LOC100577783	GB50170	10.1525	9.92443	10.4759	9.62807	9.93072	8.63576	9.58417	9.42301	10.3365	10.1258	9.48515	10.0368	9.53139	8.82668	11.5403
LOC100577784	GB52798	8.69985	8.62826	8.59675	8.35468	8.47309	8.74349	8.86663	8.43495	8.68027	8.56577	8.34018	8.09301	8.41366	9.13332	2.82187
LOC100577788	GB50903	4.83245	4.69965	5.39273	4.86535	5.13911	5.42616	5.31674	5.06711	4.98157	5.28253	4.69174	4.44723	4.90599	4.86023	2.82187
LOC100577789	GB45019	5.86735	5.76896	6.40015	6.13213	5.74794	4.15604	5.88413	5.67569	5.93698	5.83192	5.34986	5.77476	5.56919	5.53332	7.35931
LOC100577794	#N/A	7.40991	7.59719	4.96044	5.84859	4.83822	4.59987	4.92983	5.86275	5.88558	7.19404	5.58745	5.70635	6.26004	6.61271	5.09416
LOC100577795	GB46156	6.66417	6.45561	6.98301	6.90537	6.78211	6.18346	6.68278	6.2007	6.71857	6.8248	6.5492	7.10339	6.90713	5.60227	8.29787
LOC100577797	GB54662	4.99547	4.8302	4.71045	4.56446	4.37415	5.60924	5.15466	5.1229	4.14197	4.50264	4.76132	4.72039	4.9682	5.38409	2.82187
LOC100577798	GB50486	5.44603	5.15735	4.39697	4.82653	5.10012	4.88182	5.18868	4.81664	5.36196	5.3116	5.30591	5.45033	5.50963	4.86023	2.82187
LOC100577801	GB45131	7.27364	7.14493	8.1241	7.00704	7.39108	6.77371	6.95498	8.05022	7.51064	7.13216	6.9405	7.06801	7.23594	6.49284	8.86146
LOC100577803	GB44701	6.69829	6.79224	6.42001	6.72799	6.64537	7.3207	7.16728	7.0449	6.94261	6.57967	6.80119	6.49159	6.92958	7.50163	2.82187
LOC100577805	GB42370	5.10562	5.09137	5.16998	4.22842	4.44295	5.33953	5.40541	4.45867	4.7603	4.91236	4.76132	4.56399	5.05627	4.86023	2.82187
LOC100577806	#N/A	6.09093	5.96099	5.43321	5.75299	5.6721	6.029	6.30173	5.76384	5.97024	5.79192	5.98079	6.36561	6.29522	6.21778	5.09416
LOC100577807	#N/A	3.50401	4.04072	4.20153	3.47063	3.33407	3.65661	4.49496	3.25178	3.82045	4.12114	3.53808	3.79229	3.4242	3.79276	5.09416
LOC100577808	#N/A	2.82187	2.82187	2.82187	3.47063	3.33407	2.82187	3.50899	3.42764	3.27554	3.48776	3.40863	2.82187	3.4242	3.38939	2.82187
LOC100577809	GB52235	6.14169	5.92463	5.90213	6.46699	6.37311	7.7103	6.64777	6.70201	6.38086	6.28349	7.03513	6.93684	7.00197	7.18676	2.82187
LOC100577810	GB55814	5.06992	5.28027	5.30798	4.93963	4.97574	5.91574	5.56717	5.17643	5.43634	5.59613	5.16474	5.47818	5.11187	4.73746	5.09416
LOC100577815	GB53522	3.88621	3.75456	4.08877	4.08921	4.22255	3.78146	3.65958	3.56114	4.98157	4.50264	4.26697	4.17062	3.66773	4.36308	2.82187
LOC100577816	GB52673	9.62922	9.6651	8.96224	9.30058	9.40865	9.3678	9.73015	9.11928	9.8576	9.41807	9.37221	8.97009	9.36351	9.68892	8.19582
[truncated: 9,870 more rows]
