# Supplementary material for: Haemolymph removal by Varroa mite destabilizes the dynamical interaction between immune effectors and virus in bees, as predicted by Volterra's model
Source: Proc Biol Sci. 2019 Apr 17;286(1901):20190331. doi: 10.1098/rspb.2019.0331 (PMC6501932; doi:10.1098/rspb.2019.0331)
Supplement: Supplementary Data 3 [file rspb20190331supp4.xlsx]

## Sheet: diff expr 0 vs 1 mite
Apis mellifera putative immune related genes extended list
The gene list has been adapted from: Ryabov EV, Wood GR, Fannon JM, Moore JD, Bull JC, Chandler D, Mead A, Burroughs N, Evans DJ. (2014) A virulent strain of deformed wing virus (DWV) of honeybees (Apis mellifera) prevails after Varroa destructor-mediated, or in vitro, transmission. PLoS Pathog. 2014 Jun 26;10(6):e1004230. doi: 10.1371/journal.ppat.1004230.
Note that double entries were excluded from the original list for the sake of the statistical analysis
The details of the statistical analysis are reported in columns Q to BH; if you are interested, use the command "format > unhide"
If you want to change the significance level go to the spreadsheet "reference parameters"
To see only the significantly differentially expressed genes, use the "filter" in column BK
Correction for multiple comparisons according to McDonald, J.H. 2014. Handbook of Biological Statistics (3rd ed.). Sparky House Publishing, Baltimore, Maryland
							3	4	5	6	7	8	9	10	11
							no mite				one mite						filtering						group2										group2										group2
Apis mellifera OGS1 (2008 version)	Apis mellifera OGS3.1 BEEBASE	FBgn ortholog	Gene Product	GO term / Pathway			G2	G3	G4	G5	H1	H2	H3	H4	H5				2	3	4	5	1	2	3	4	5		2	3	4	5	1	2	3	4	5		2	3	4	5	1	2	3	4	5		n1
GB10023	GB52350	FBgn0036448	myopic	Toll_pathway_Toll signaling pathway ; GO:0008063 and children	Toll_pathwa		1.73873	0.687643	1.09977	0.478343	0.797901	12.4557	1.81435	4.29356	2.4796		OK		5	2	4	1	3	9	6	8	7		0	0	0	0	0	0	0	0	0		5	2	4	1	3	9	6	8	7		4
GB10539	GB54845	FBgn0026318	TNF-receptor-associated factor 6	Toll_pathway_Toll signaling pathway ; GO:0008063 and children	Toll_pathwa		0.47189	0.453235	0.326193	0.0919574	0	0.388297	0.607577	1.2079	0.336481		OK		7	6	3	2	1	5	8	9	4		0	0	0	0	0	0	0	0	0		7	6	3	2	1	5	8	9	4		4
GB10655	GB44055	FBgn0000250	cactus	Toll_pathway_Toll signaling pathway ; GO:0008063 and children	Toll_pathwa		1.02481	0.917186	0.94453	0.798821	0.969073	2.75979	2.39906	4.38793	6.37738		OK		5	2	3	1	4	7	6	8	9		0	0	0	0	0	0	0	0	0		5	2	3	1	4	7	6	8	9		4
GB11090	GB47167	FBgn0026318	TNF-receptor-associated factor 6	Toll_pathway_Toll signaling pathway ; GO:0008063 and children	Toll_pathwa		0.497892	0.298881	0.0764814	0	0.215789	0	0.569828	0.254892	1.42009		OK		7	6	3	1	4	1	8	5	9		0	0	0	0.5	0	0.5	0	0	0		7	6	3	1.5	4	1.5	8	5	9		4
GB11883	GB53302	FBgn0000250	cactus	Toll_pathway_Toll signaling pathway ; GO:0008063 and children	Toll_pathwa		2.94603	3.5241	2.04055	2.42163	1.57862	5.28907	9.28743	4.49717	3.51384		OK		4	6	2	3	1	8	9	7	5		0	0	0	0	0	0	0	0	0		4	6	2	3	1	8	9	7	5		4
GB12279	GB55279	FBgn0028990	Serpin 27A	Toll_pathway_Toll signaling pathway ; GO:0008063 and children	Toll_pathwa		0.587017	0.375874	0.520993	0.372834	0.113074	2.00368	1.39342	2.27059	6.13906		OK		5	3	4	2	1	7	6	8	9		0	0	0	0	0	0	0	0	0		5	3	4	2	1	7	6	8	9		4
GB12344	GB51498	FBgn0033402	Myd88	Toll_pathway_Toll signaling pathway ; GO:0008063 and children	Toll_pathwa		0.526066	1.26317	0.7934	0.782839	0.497454	1.25928	2.57249	1.07726	0.954829		OK		2	8	4	3	1	7	9	6	5		0	0	0	0	0	0	0	0	0		2	8	4	3	1	7	9	6	5		4
GB13429	GB47680	FBgn0022787	Helicase 89B	Toll_pathway_Toll signaling pathway ; GO:0008063 and children	Toll_pathwa		1.18815	0.772825	0.693086	0.867525	1.61656	1.58408	1.58358	2.74104	3.30305		OK		4	2	1	3	7	6	5	8	9		0	0	0	0	0	0	0	0	0		4	2	1	3	7	6	5	8	9		4
GB13503	GB52103	FBgn0003495	spatzle	Toll_pathway_Toll signaling pathway ; GO:0008063 and children	Toll_pathwa		0.389309	0.623198	0.39868	0.303459	0.224972	2.56276	1.26241	1.06295	1.11039		OK		3	5	4	2	1	9	8	6	7		0	0	0	0	0	0	0	0	0		3	5	4	2	1	9	8	6	7		4
GB13520	GB44185	FBgn0000250	cactus	Toll_pathway_Toll signaling pathway ; GO:0008063 and children	Toll_pathwa		3.9498	5.30495	5.93906	5.15636	10.8557	18.1795	16.7404	14.9272	52.0233		OK		1	3	4	2	5	8	7	6	9		0	0	0	0	0	0	0	0	0		1	3	4	2	5	8	7	6	9		4
GB13742	GB40654	FBgn0260632	dorsal	Toll_pathway_Toll signaling pathway ; GO:0008063 and children	Toll_pathwa		10.4043	11.636	11.9406	11.2715	4.03544	17.8771	20.5254	7.72783	7.74574		OK		4	6	7	5	1	8	9	2	3		0	0	0	0	0	0	0	0	0		4	6	7	5	1	8	9	2	3		4
GB13922	GB41067	FBgn0010269	Downstream of raf1	Toll_pathway_Toll signaling pathway ; GO:0008063 and children	Toll_pathwa		0.876878	0.421107	0.448992	0.341755	0	0	0.418154	0.598549	0.416839		OK		9	6	7	3	1	1	5	8	4		0	0	0	0	0.5	0.5	0	0	0		9	6	7	3	1.5	1.5	5	8	4		4
GB13935	GB49466	FBgn0261988	G protein-coupled receptor kinase 2	Toll_pathway_Toll signaling pathway ; GO:0008063 and children	Toll_pathwa		1.98957	1.45668	1.04211	1.49999	1.01779	6.01175	3.11691	7.54726	10.6051		OK		5	3	2	4	1	7	6	8	9		0	0	0	0	0	0	0	0	0		5	3	2	4	1	7	6	8	9		4
GB14810	GB53713	FBgn0022787	Helicase 89B	Toll_pathway_Toll signaling pathway ; GO:0008063 and children	Toll_pathwa		1.16576	1.13134	1.13413	1.13586	2.56833	5.59562	2.4877	2.93427	4.36403		OK		4	1	2	3	6	9	5	7	8		0	0	0	0	0	0	0	0	0		4	1	2	3	6	9	5	7	8		4
GB15273	GB48707	FBgn0024222	immune response deficient 5	Toll_pathway_Toll signaling pathway ; GO:0008063 and children	Toll_pathwa		1.22029	1.30227	1.18718	0.819082	0.235057	1.33883	3.4333	2.63769	1.83693		OK		4	5	3	2	1	6	9	8	7		0	0	0	0	0	0	0	0	0		4	5	3	2	1	6	9	8	7		4
GB15684	GB51427	FBgn0003882	tube	Toll_pathway_Toll signaling pathway ; GO:0008063 and children	Toll_pathwa		5.35351	5.92233	4.64043	4.62006	3.97755	10.6983	11.7069	10.9628	11.452		OK		4	5	3	2	1	6	9	7	8		0	0	0	0	0	0	0	0	0		4	5	3	2	1	6	9	7	8		4
GB15688	GB52631	FBgn0003495	spatzle	Toll_pathway_Toll signaling pathway ; GO:0008063 and children	Toll_pathwa		5.46509	4.99668	5.52129	5.20204	6.46809	5.53474	3.75882	6.99453	5.54556		OK		4	2	5	3	8	6	1	9	7		0	0	0	0	0	0	0	0	0		4	2	5	3	8	6	1	9	7		4
GB15714	GB43157	FBgn0036448	myopic	Toll_pathway_Toll signaling pathway ; GO:0008063 and children	Toll_pathwa		1.74721	1.41051	1.27717	1.33844	1.27949	2.97456	1.78417	2.2516	2.19098		OK		5	4	1	3	2	9	6	8	7		0	0	0	0	0	0	0	0	0		5	4	1	3	2	9	6	8	7		4
GB16281	GB45171	FBgn0010602	lesswright	Toll_pathway_Toll signaling pathway ; GO:0008063 and children	Toll_pathwa		10.1653	14.1331	11.7931	11.0266	4.55974	21.9935	65.3293	6.69612	5.67704		OK		4	7	6	5	1	8	9	3	2		0	0	0	0	0	0	0	0	0		4	7	6	5	1	8	9	3	2		4
GB16397	GB49344	FBgn0010441	pelle	Toll_pathway_Toll signaling pathway ; GO:0008063 and children	Toll_pathwa		1.51613	0.7489	0.638794	1.11426	0.976261	0.285156	2.3301	1.77411	2.96524		OK		6	3	2	5	4	1	8	7	9		0	0	0	0	0	0	0	0	0		6	3	2	5	4	1	8	7	9		4
GB16970	GB44935	FBgn0025574	Pellino	Toll_pathway_Toll signaling pathway ; GO:0008063 and children	Toll_pathwa		13.391	12.4158	13.4062	11.0922	16.56	8.46251	17.0321	11.6268	6.92583		OK		6	5	7	3	8	2	9	4	1		0	0	0	0	0	0	0	0	0		6	5	7	3	8	2	9	4	1		4
GB17879	GB51741	FBgn0030310	Peptidoglycan recognition protein SA	Toll_pathway_Toll signaling pathway ; GO:0008063 and children	Toll_pathwa		7.87129	10.6585	8.40433	12.3716	2.68443	3.39774	9.08238	4.75631	11.0412		OK		4	7	5	9	1	2	6	3	8		0	0	0	0	0	0	0	0	0		4	7	5	9	1	2	6	3	8		4
GB18520	GB50418	FBgn0262473	Toll	Toll_pathway_Toll signaling pathway ; GO:0008063 and children	Toll_pathwa		0.582618	0.631532	0.43981	0.45414	0.98118	46.4617	1.83845	58.5285	6.17219		OK		3	4	1	2	5	8	6	9	7		0	0	0	0	0	0	0	0	0		3	4	1	2	5	8	6	9	7		4
GB19537	GB44031	FBgn0260632	dorsal	Toll_pathway_Toll signaling pathway ; GO:0008063 and children	Toll_pathwa		1.25238	0.817332	0.513008	0.650803	1.44743	5.70752	1.56195	2.3673	5.03747		OK		4	3	1	2	5	9	6	7	8		0	0	0	0	0	0	0	0	0		4	3	1	2	5	9	6	7	8		4
GB10640	GB48399	FBgn0029114	Toll / Tollo	Toll_pathway_Toll signaling pathway ;	Toll_pathwa		0.415187	0.152472	0.225096	0.13326	0.973816	0.643084	0.0698784	0.600146	0.835903		OK		5	3	4	2	9	7	1	6	8		0	0	0	0	0	0	0	0	0		5	3	4	2	9	7	1	6	8		4
GB13677	GB46708	FBgn0031114	cactin	Toll_pathway_Toll signaling pathway ;	Toll_pathwa		4.04627	2.14504	2.38933	1.59748	3.4618	0.345921	5.98405	6.13366	5.84532		OK		6	3	4	2	5	1	8	9	7		0	0	0	0	0	0	0	0	0		6	3	4	2	5	1	8	9	7		4
GB14044	GB55007	FBgn0030051	persephone-PSH Serine Protease Immune Response Integrator	Toll_pathway_Toll signaling pathway ;	Toll_pathwa		1.76133	0.912787	0.513866	0.958082	1.49379	1.41804	1.77652	2.0499	2.89131		OK		6	2	1	3	5	4	7	8	9		0	0	0	0	0	0	0	0	0		6	2	1	3	5	4	7	8	9		4
GB14609	GB48662	FBgn0004364	Toll	Toll_pathway_Toll signaling pathway ;	Toll_pathwa		4.95181	0.92801	0.519468	0.658997	0.418759	1.19257	1.3477	1.73125	1.89462		OK		9	4	2	3	1	5	6	7	8		0	0	0	0	0	0	0	0	0		9	4	2	3	1	5	6	7	8		4
GB14720	GB42451	FBgn0086657	Mik2	Toll_pathway_Toll signaling pathway ;	Toll_pathwa		1.25465	1.49817	1.62516	1.18943	1.76358	3.34831	3.22112	3.61081	5.8997		OK		2	3	4	1	5	7	6	8	9		0	0	0	0	0	0	0	0	0		2	3	4	1	5	7	6	8	9		4
GB15177	GB43456	FBgn0034476	Toll	Toll_pathway_Toll signaling pathway ;	Toll_pathwa		2.93773	2.50284	1.67667	2.88394	3.2177	6.63501	3.65057	6.64507	6.24043		OK		4	2	1	3	5	8	6	9	7		0	0	0	0	0	0	0	0	0		4	2	1	3	5	8	6	9	7		4
GB15606	GB43914	FBgn0024846	0	Toll_pathway_Toll signaling pathway ;	Toll_pathwa		3.79442	3.26198	3.25252	2.88465	2.67996	101.762	5.0396	54.7744	12.4258		OK		5	4	3	2	1	9	6	8	7		0	0	0	0	0	0	0	0	0		5	4	3	2	1	9	6	8	7		4
GB16299	GB48426	FBgn0029114	Toll	Toll_pathway_Toll signaling pathway ;	Toll_pathwa		0.62631	0.245076	0.441843	0.433953	3.6595	1.0689	0.398222	0.807525	1.52171		OK		5	1	4	3	9	7	2	6	8		0	0	0	0	0	0	0	0	0		5	1	4	3	9	7	2	6	8		4
GB16472	GB48820	FBgn0028985	NEC LIKE	Toll_pathway_Toll signaling pathway ;	Toll_pathwa		5.78151	9.27526	11.2818	7.18082	7.37954	30.5307	10.7978	20.6861	16.1276		OK		1	4	6	2	3	9	5	8	7		0	0	0	0	0	0	0	0	0		1	4	6	2	3	9	5	8	7		4
GB17012	GB46970	not found	NEC LIKE	Toll_pathway_Toll signaling pathway ;	Toll_pathwa		1.00963	0.67134	0.572637	0.484298	0.134639	2.55623	2.35544	1.11326	1.55058		OK		5	4	3	2	1	9	8	6	7		0	0	0	0	0	0	0	0	0		5	4	3	2	1	9	8	6	7		4
GB17781	GB48396	FBgn0036494	Toll	Toll_pathway_Toll signaling pathway ;	Toll_pathwa		0.800767	0.204295	0.338267	0.292586	1.04117	0.823644	0.186156	2.30595	3.56867		OK		5	2	4	3	7	6	1	8	9		0	0	0	0	0	0	0	0	0		5	2	4	3	7	6	1	8	9		4
GB17927	GB49441	FBgn0003450	Toll-Pathway_persephone-Serine protease--Extracellular-cSP10	Toll_pathway_Toll signaling pathway ;	Toll_pathwa		3.73419	5.56665	4.15868	4.72994	16.7236	11.2666	5.65376	12.1074	12.4258		OK		1	4	2	3	9	6	5	7	8		0	0	0	0	0	0	0	0	0		1	4	2	3	9	6	5	7	8		4
GB17936	GB55933	FBgn0039532		Toll_pathway_Toll signaling pathway ;	Toll_pathwa		1.19147	0.776534	0.52292	0.464363	1.62293	0	0.584405	2.0913	2.18462		OK		6	5	3	2	7	1	4	8	9		0	0	0	0	0	0	0	0	0		6	5	3	2	7	1	4	8	9		4
GB17961	GB41158	not found	Tollip	Toll_pathway_Toll signaling pathway ;	Toll_pathwa		2.82096	2.81569	3.09278	2.06954	4.31513	7.64644	8.45117	4.75727	2.36645		OK		4	3	5	1	6	8	9	7	2		0	0	0	0	0	0	0	0	0		4	3	5	1	6	8	9	7	2		4
GB17975	GB40699	FBgn0029114	Tollo	Toll_pathway_Toll signaling pathway ;	Toll_pathwa		1.25326	0.773814	0.330023	0.837334	4.03496	0	0.25613	0.183313	1.0213		OK		8	5	4	6	9	1	3	2	7		0	0	0	0	0	0	0	0	0		8	5	4	6	9	1	3	2	7		4
GB18032	GB42472	not found	dorsal	Toll_pathway_Toll signaling pathway ;	Toll_pathwa		1.19454	1.92344	1.64065	1.20498	0.121816	0.462556	0.924821	1.29502	3.20665		OK		4	8	7	5	1	2	3	6	9		0	0	0	0	0	0	0	0	0		4	8	7	5	1	2	3	6	9		4
GB19066	GB44032	not found	dorsal	Toll_pathway_Toll signaling pathway ;	Toll_pathwa		37.8674	35.2481	31.5505	29.4495	92.8822	44.2997	44.4529	53.8375	34.6234		OK		5	4	2	1	9	6	7	8	3		0	0	0	0	0	0	0	0	0		5	4	2	1	9	6	7	8	3		4
GB19582	GB54611	FBgn0028984	NEC-like	Toll_pathway_Toll signaling pathway ;	Toll_pathwa		12.1638	15.2836	8.18458	17.5951	17.6996	20.215	39.0935	11.9235	10.4649		OK		4	5	1	6	7	8	9	3	2		0	0	0	0	0	0	0	0	0		4	5	1	6	7	8	9	3	2		4
GB11563	GB45417	FBgn0041182	TEPB	TEP - Thioester-containing protein	TEP - Thioe		1.34361	1.74999	1.41348	1.87248	1.34112	3.75233	2.80753	2.20946	2.26451		OK		2	4	3	5	1	9	8	6	7		0	0	0	0	0	0	0	0	0		2	4	3	5	1	9	8	6	7		4
GB12605	GB42455	FBgn0041182	TEP7	TEP - Thioester-containing protein	TEP - Thioe		4.00779	5.99972	5.33372	4.29205	7.30155	4.6695	8.89969	7.78943	15.2498		OK		1	5	4	2	6	3	8	7	9		0	0	0	0	0	0	0	0	0		1	5	4	2	6	3	8	7	9		4
GB18789	GB48204	FBgn0020240	TEPA	TEP - Thioester-containing protein	TEP - Thioe		0.76574	0.525334	0.425693	0.312651	0.347679	0.360053	0.845075	1.12004	2.44405		OK		6	5	4	1	2	3	7	8	9		0	0	0	0	0	0	0	0	0		6	5	4	1	2	3	7	8	9		4
GB10222	GB41097	not found	SP18	serine proteases	serine prot		1.96106	0.573249	0.314337	1.26276	0.443443	1.12255	0.780659	1.5714	4.1342		OK		8	3	1	6	2	5	4	7	9		0	0	0	0	0	0	0	0	0		8	3	1	6	2	5	4	7	9		4
GB10646	GB41409	FBgn0036436	SP4	serine proteases	serine prot		0.555481	0.640225	0.443704	0.432987	0.577796	0.365664	3.81442	2.27499	3.01025		OK		4	6	3	2	5	1	9	7	8		0	0	0	0	0	0	0	0	0		4	6	3	2	5	1	9	7	8		4
GB10758	GB44146	FBgn0034709	0	serine proteases	serine prot		25.1539	66.9238	33.3516	98.3608	247.511	48.6202	32.7355	18.4064	40.9397		OK		2	7	4	8	9	6	3	1	5		0	0	0	0	0	0	0	0	0		2	7	4	8	9	6	3	1	5		4
GB10943	GB49946	FBgn0011653	cSPH41	serine proteases	serine prot		0.828081	1.10465	0.546497	0.525942	0.850714	8.68142	2.10605	5.02436	4.54875		OK		3	5	2	1	4	9	6	8	7		0	0	0	0	0	0	0	0	0		3	5	2	1	4	9	6	8	7		4
GB11297	GB47402	not found	SP31	serine proteases	serine prot		0.993449	0.130115	0.166477	0.140796	0.15657	1.18904	0.155043	1.10965	3.09111		OK		6	1	5	2	4	8	3	7	9		0	0	0	0	0	0	0	0	0		6	1	5	2	4	8	3	7	9		4
GB11298	GB52598	FBgn0032213	cSPH42	serine proteases	serine prot		149.716	141.12	80.3488	158.973	731.687	287.481	96.9969	300.824	396.056		OK		4	3	1	5	9	6	2	7	8		0	0	0	0	0	0	0	0	0		4	3	1	5	9	6	2	7	8		4
GB11511	GB40138	not found	SP32	serine proteases	serine prot		0.117292	0.0563275	0.576552	0.365707	0.20334	0.772114	0.939668	0.960747	1.00362		OK		2	1	5	4	3	6	7	8	9		0	0	0	0	0	0	0	0	0		2	1	5	4	3	6	7	8	9		4
GB11552	GB48510	not found	SP34	serine proteases	serine prot		1.22419	1.45014	1.00292	2.481	0.141485	10.7448	1.77468	11.1973	22.812		OK		3	4	2	6	1	7	5	8	9		0	0	0	0	0	0	0	0	0		3	4	2	6	1	7	5	8	9		4
GB11588	GB50026	not found	SP27	serine proteases	serine prot		14.9368	4.17133	14.6146	4.93559	47.1452	2.67191	8.68677	6.81559	20.3752		OK		7	2	6	3	9	1	5	4	8		0	0	0	0	0	0	0	0	0		7	2	6	3	9	1	5	4	8		4
GB11698	GB49552	not found	cSP3	serine proteases	serine prot		8.54966	8.06183	8.35922	7.73449	11.0353	6.57297	5.321	6.77307	5.51785		OK		8	6	7	5	9	3	1	4	2		0	0	0	0	0	0	0	0	0		8	6	7	5	9	3	1	4	2		4
GB12253	GB50586	FBgn0003319	SP16	serine proteases	serine prot		3.31662	3.1855	0.752444	6.84095	3.75946	4.87039	2.87605	4.44071	6.84006		OK		4	3	1	9	5	7	2	6	8		0	0	0	0	0	0	0	0	0		4	3	1	9	5	7	2	6	8		4
GB12300	GB41399	FBgn0042098	SP5	serine proteases	serine prot		1.48912	1.56433	2.63056	1.16074	1.45213	5.51397	3.72808	6.86108	5.30907		OK		3	4	5	1	2	8	6	9	7		0	0	0	0	0	0	0	0	0		3	4	5	1	2	8	6	9	7		4
GB12379	GB54517	not found	SP48	serine proteases	serine prot		0.237939	0.399933	0.4386	0.278204	0.824993	0	0.476554	0.730867	1.01798		OK		2	4	5	3	8	1	6	7	9		0	0	0	0	0	0	0	0	0		2	4	5	3	8	1	6	7	9		4
GB13019	GB54775	FBgn0030027	SPH56	serine proteases	serine prot		4.84624	3.2734	3.6556	2.76407	3.55188	5.18733	3.26924	6.77736	9.77686		OK		6	3	5	1	4	7	2	8	9		0	0	0	0	0	0	0	0	0		6	3	5	1	4	7	2	8	9		4
GB13263	GB52185	not found	SP40	serine proteases	serine prot		6.205	2.32151	1.86197	1.85594	5.00331	10.9241	8.58786	12.4109	15.0226		OK		5	3	2	1	4	7	6	8	9		0	0	0	0	0	0	0	0	0		5	3	2	1	4	7	6	8	9		4
GB13397	GB41410	not found	SPH51	serine proteases	serine prot		0.779724	1.41459	0.958191	1.28309	1.65213	5.1328	3.32163	5.32232	13.0965		OK		1	4	2	3	5	7	6	8	9		0	0	0	0	0	0	0	0	0		1	4	2	3	5	7	6	8	9		4
GB13489	GB44120	FBgn0050375	SP28	serine proteases	serine prot		0.910891	2.0505	0.909496	0.976282	2.96089	0.749531	2.47593	1.98188	6.00798		OK		3	6	2	4	8	1	7	5	9		0	0	0	0	0	0	0	0	0		3	6	2	4	8	1	7	5	9		4
GB13791	GB48079	FBgn0015316	SP22	serine proteases	serine prot		15.3574	0.946545	1.5643	0.384091	0.569497	0	1.50385	4.03617	6.55866		OK		9	4	6	2	3	1	5	7	8		0	0	0	0	0	0	0	0	0		9	4	6	2	3	1	5	7	8		4
GB14001	GB53354	FBgn0032402	cSPH50	serine proteases	serine prot		0.954101	0.738197	0.130275	0.991605	1.65405	0.697855	1.00095	1.19398	1.81419		OK		4	3	1	5	8	2	6	7	9		0	0	0	0	0	0	0	0	0		4	3	1	5	8	2	6	7	9		4
GB14077	GB54762	FBgn0033362	cSP6	serine proteases	serine prot		0.663207	0.70404	0.364607	0.843457	1.81539	4.36579	2.17721	4.64612	3.18585		OK		2	3	1	4	5	8	6	9	7		0	0	0	0	0	0	0	0	0		2	3	1	4	5	8	6	9	7		4
GB14233	GB51631	not found	SP24	serine proteases	serine prot		14.1223	80.8783	76.8023	101.329	202.096	484.455	12.1973	506.175	1280.19		OK		2	4	3	5	6	7	1	8	9		0	0	0	0	0	0	0	0	0		2	4	3	5	6	7	1	8	9		4
GB14247	GB45700	FBgn0000533	cSP2	serine proteases	serine prot		6.16157	7.0042	3.97762	8.99771	13.9269	1.54028	3.79369	9.10376	22.6905		OK		4	5	3	6	8	1	2	7	9		0	0	0	0	0	0	0	0	0		4	5	3	6	8	1	2	7	9		4
GB14309	GB50650	not found	cSP33	serine proteases	serine prot		0.333978	0.224542	0.20521	0.468593	0.926386	0.293136	0.802685	0.91188	4.19131		OK		4	2	1	5	8	3	6	7	9		0	0	0	0	0	0	0	0	0		4	2	1	5	8	3	6	7	9		4
GB14366	GB52597	not found	cSPH39	serine proteases	serine prot		1.33842	1.67946	1.53865	1.48078	3.59275	1.98949	1.48239	3.35967	2.58601		OK		1	5	4	2	9	6	3	8	7		0	0	0	0	0	0	0	0	0		1	5	4	2	9	6	3	8	7		4
GB14603	GB40137	FBgn0026250	SP17	serine proteases	serine prot		49.9272	42.8436	16.8753	57.9152	64.7978	46.0966	61.9284	16.2019	33.4606		OK		6	4	2	7	9	5	8	1	3		0	0	0	0	0	0	0	0	0		6	4	2	7	9	5	8	1	3		4
GB14644	GB41407	not found	SP29	serine proteases	serine prot		2.79005	27.8881	15.2694	20.5847	29.0213	21.3563	34.6792	7.17494	19.8019		OK		1	7	3	5	8	6	9	2	4		0	0	0	0	0	0	0	0	0		1	7	3	5	8	6	9	2	4		4
GB14654	GB41408	FBgn0039272	SP11	serine proteases	serine prot		1.47799	1.13565	0.317849	0.576033	0.768683	4.37822	1.48009	4.69121	7.37717		OK		5	4	1	2	3	7	6	8	9		0	0	0	0	0	0	0	0	0		5	4	1	2	3	7	6	8	9		4
GB14774	GB48081	not found	SP47	serine proteases	serine prot		0.41842	0.502349	0.24424	0.554457	0.253884	5.09563	0.718311	1.84218	1.96914		OK		3	4	1	5	2	9	6	7	8		0	0	0	0	0	0	0	0	0		3	4	1	5	2	9	6	7	8		4
GB15254	GB50290	not found	cSPH55	serine proteases	serine prot		1.57807	1.45739	0.546973	1.3247	5.33126	16.2482	3.12589	7.37451	7.73244		OK		4	3	1	2	6	9	5	7	8		0	0	0	0	0	0	0	0	0		4	3	1	2	6	9	5	7	8		4
GB15317	GB52191	FBgn0051217	SP49	serine proteases	serine prot		1.83451	2.23511	1.46118	1.72126	0.883429	8.27449	4.0436	3.89579	6.49203		OK		4	5	2	3	1	9	7	6	8		0	0	0	0	0	0	0	0	0		4	5	2	3	1	9	7	6	8		4
GB15453	GB47933	not found	SP44	serine proteases	serine prot		1.04312	0.972415	0.904851	0.669605	3.61675	5.65492	0.948041	5.52865	12.9508		OK		5	4	2	1	6	8	3	7	9		0	0	0	0	0	0	0	0	0		5	4	2	1	6	8	3	7	9		4
GB15640	GB50164	not found	SP13	serine proteases	serine prot		1.36345	1.80063	1.46608	2.28499	2.24552	1.34631	0.936267	2.51283	3.6944		OK		3	5	4	7	6	2	1	8	9		0	0	0	0	0	0	0	0	0		3	5	4	7	6	2	1	8	9		4
GB15702	GB48471	not found	SPH53	serine proteases	serine prot		1.07464	1.10097	1.05649	0.837662	0.869408	1.88645	10.4952	3.8144	1.83905		OK		4	5	3	1	2	7	9	8	6		0	0	0	0	0	0	0	0	0		4	5	3	1	2	7	9	8	6		4
GB15980	GB42804	not found	SPH54	serine proteases	serine prot		3.36155	1.15309	1.06362	1.27096	3.34945	2.79363	1.8661	3.86492	5.47874		OK		7	2	1	3	6	5	4	8	9		0	0	0	0	0	0	0	0	0		7	2	1	3	6	5	4	8	9		4
GB16021	GB45565	FBgn0038481	SP35	serine proteases	serine prot		50.7533	98.9689	49.9229	96.8511	23.7083	233.486	105.919	124.598	166.034		OK		3	5	2	4	1	9	6	7	8		0	0	0	0	0	0	0	0	0		3	5	2	4	1	9	6	7	8		4
GB16038	GB48080	not found	SPH57	serine proteases	serine prot		1.23632	1.42493	1.11415	2.12011	1.00021	4.34053	3.3487	5.23218	4.46656		OK		3	4	2	5	1	7	6	9	8		0	0	0	0	0	0	0	0	0		3	4	2	5	1	7	6	9	8		4
GB16147	GB45701	FBgn0027930	cSP1	serine proteases	serine prot		1.17466	0.737682	0.416399	0.950839	1.40982	1.48703	0.775599	2.77549	3.22149		OK		5	2	1	4	6	7	3	8	9		0	0	0	0	0	0	0	0	0		5	2	1	4	6	7	3	8	9		4
GB16214	GB56027	FBgn0036287	SP38	serine proteases	serine prot		14.1469	13.0909	10.312	14.2782	24.641	15.5943	11.4367	7.65234	5.99536		OK		6	5	3	7	9	8	4	2	1		0	0	0	0	0	0	0	0	0		6	5	3	7	9	8	4	2	1		4
GB16220	GB44149	FBgn0038727	cSP21	serine proteases	serine prot		1.58833	2.33916	1.5615	1.44442	1.19321	8.01604	2.75701	6.07139	16.3088		OK		4	5	3	2	1	8	6	7	9		0	0	0	0	0	0	0	0	0		4	5	3	2	1	8	6	7	9		4
GB16367	GB40831	FBgn0038211	SP46	serine proteases	serine prot		6.37933	5.05732	4.38636	4.89364	6.23185	7.66559	2.86826	3.93975	4.04336		OK		8	6	4	5	7	9	1	2	3		0	0	0	0	0	0	0	0	0		8	6	4	5	7	9	1	2	3		4
GB17145	GB46726	FBgn0051728	cSP7	serine proteases	serine prot		0.932546	0.518552	0.392049	0.879934	0.765796	0.323095	1.4324	2.01015	1.53989		OK		6	3	2	5	4	1	7	9	8		0	0	0	0	0	0	0	0	0		6	3	2	5	4	1	7	9	8		4
GB17345	GB41710	FBgn0036612	SPH19	serine proteases	serine prot		0.921017	0.823176	0.330115	1.17658	2.97162	9.43119	1.87393	2.72427	2.69989		OK		3	2	1	4	8	9	5	7	6		0	0	0	0	0	0	0	0	0		3	2	1	4	8	9	5	7	6		4
GB17654	GB43369	not found	SP45	serine proteases	serine prot		11.7968	6.93929	12.1388	6.34702	12.2938	18.3432	15.2867	22.0387	32.5046		OK		3	2	4	1	5	7	6	8	9		0	0	0	0	0	0	0	0	0		3	2	4	1	5	7	6	8	9		4
GB18178	GB41178	FBgn0038447	SP15	serine proteases	serine prot		0.528991	0.869082	0.273713	1.1068	1.44801	0.366554	0.477963	0.51312	1.03233		OK		5	6	1	8	9	2	3	4	7		0	0	0	0	0	0	0	0	0		5	6	1	8	9	2	3	4	7		4
GB18450	GB52706	FBgn0033365	cSP26	serine proteases	serine prot		4.41184	1.52399	1.28407	2.2323	3.75714	3.0571	2.12601	4.27947	7.94744		OK		8	2	1	4	6	5	3	7	9		0	0	0	0	0	0	0	0	0		8	2	1	4	6	5	3	7	9		4
GB18530	GB50314	not found	SP43	serine proteases	serine prot		0.124135	0.178842	0.0762739	0.193522	3.01285	0.817162	0	5.08401	4.60276		OK		3	4	2	5	7	6	1	9	8		0	0	0	0	0	0	0	0	0		3	4	2	5	7	6	1	9	8		4
GB18944	GB46203	FBgn0037627	SPH37	serine proteases	serine prot		2.12031	4.22384	3.3294	3.06064	8.8492	2.58476	1.79752	3.05542	6.04756		OK		2	7	6	5	9	3	1	4	8		0	0	0	0	0	0	0	0	0		2	7	6	5	9	3	1	4	8		4
GB19292	GB45336	not found	SPH52	serine proteases	serine prot		22.6711	33.7767	24.405	24.5595	27.5431	14.689	31.4117	44.7802	25.2031		OK		2	8	3	4	6	1	7	9	5		0	0	0	0	0	0	0	0	0		2	8	3	4	6	1	7	9	5		4
GB19590	GB40567	FBgn0002926	SP20	serine proteases	serine prot		1.59653	1.71382	3.45266	3.03797	3.09341	0.927329	1.05691	2.7565	4.06255		OK		3	4	8	6	7	1	2	5	9		0	0	0	0	0	0	0	0	0		3	4	8	6	7	1	2	5	9		4
GB19719	GB50648	FBgn0085379	cSP25	serine proteases	serine prot		0.914419	0.724573	0.941112	0.890966	2.0212	4.81558	1.43899	3.97911	4.10777		OK		3	1	4	2	6	9	5	7	8		0	0	0	0	0	0	0	0	0		3	1	4	2	6	9	5	7	8		4
GB19846	GB50761	FBgn0038485	SP36	serine proteases	serine prot		46.4628	4.35902	4.03105	2.52187	1.71381	0	1.59424	7.36132	3.33225		OK		9	7	6	4	3	1	2	8	5		0	0	0	0	0	0	0	0	0		9	7	6	4	3	1	2	8	5		4
GB19856	GB40926	FBgn0051265	SP12	serine proteases	serine prot		4.80626	7.57229	7.14978	9.2674	24.8505	9.43615	7.33423	8.2881	7.21496		OK		1	5	2	7	9	8	4	6	3		0	0	0	0	0	0	0	0	0		1	5	2	7	9	8	4	6	3		4
GB10506	GB52097	FBgn0058006	AmSCR-B1	Scav. Receptor A	Scav. Recep		9.72428	7.33846	6.4018	7.30919	5.93478	9.79797	7.80751	25.0946	11.7452		OK		6	4	2	3	1	7	5	9	8		0	0	0	0	0	0	0	0	0		6	4	2	3	1	7	5	9	8		4
GB11743	GB45986	FBgn0035290	AmSCR-B2	Scav. Receptor A	Scav. Recep		8.82424	12.5205	9.6117	7.9584	24.1479	12.7219	17.1728	16.1286	23.5044		OK		2	4	3	1	9	5	7	6	8		0	0	0	0	0	0	0	0	0		2	4	3	1	9	5	7	6	8		4
GB12378	GB50865	not found	AmSCR-B3	Scav. Receptor A	Scav. Recep		3.85211	12.9494	8.87587	17.2652	26.0446	3.80368	11.0217	4.33853	9.33894		OK		2	7	4	8	9	1	6	3	5		0	0	0	0	0	0	0	0	0		2	7	4	8	9	1	6	3	5		4
GB12538	GB50482	FBgn0023479	GRAAL/Tequila-like	Scav. Receptor A	Scav. Recep		5.42101	3.84439	4.39549	3.32369	3.19715	31.5487	5.01784	18.9667	16.0984		OK		6	3	4	2	1	9	5	8	7		0	0	0	0	0	0	0	0	0		6	3	4	2	1	9	5	8	7		4
GB12830	GB50454	not found	AmSCR-B4	Scav. Receptor A	Scav. Recep		7.53311	11.2814	46.8956	8.11252	32.563	16.3123	13.8681	28.0105	36.4695		OK		1	3	9	2	7	5	4	6	8		0	0	0	0	0	0	0	0	0		1	3	9	2	7	5	4	6	8		4
GB13360	GB49476	FBgn0034660	lox2-like	Scav. Receptor A	Scav. Recep		3.82234	2.98475	3.03601	3.65769	2.58595	13.7061	5.92171	18.7728	54.6877		OK		5	2	3	4	1	7	6	8	9		0	0	0	0	0	0	0	0	0		5	2	3	4	1	7	6	8	9		4
GB13813	GB49363	FBgn0027562	AmSCR-B5	Scav. Receptor A	Scav. Recep		1.54876	3.21414	1.22352	2.32823	2.10962	7.64644	6.42542	6.56956	10.5702		OK		2	5	1	4	3	8	6	7	9		0	0	0	0	0	0	0	0	0		2	5	1	4	3	8	6	7	9		4
GB14314	GB53014	not found	AmSCR-B6	Scav. Receptor A	Scav. Recep		3.90561	0.976344	2.10391	2.29369	7.42011	3.87411	1.04094	5.14927	8.08764		OK		6	1	3	4	8	5	2	7	9		0	0	0	0	0	0	0	0	0		6	1	3	4	8	5	2	7	9		4
GB15549	GB48343	not found	AmSCR-B7	Scav. Receptor A	Scav. Recep		1.49255	0.796413	0.271729	1.12032	0.670837	2.18338	3.32148	5.99959	17.1858		OK		5	3	1	4	2	6	7	8	9		0	0	0	0	0	0	0	0	0		5	3	1	4	2	6	7	8	9		4
GB16388	GB40306	not found	AmSCR-B8	Scav. Receptor A	Scav. Recep		59.2095	76.2689	121.675	84.742	122.902	95.1605	87.3682	165.854	189.21		OK		1	2	6	3	7	5	4	8	9		0	0	0	0	0	0	0	0	0		1	2	6	3	7	5	4	8	9		4
GB19649	GB54246	FBgn0033192	Corin-like	Scav. Receptor A	Scav. Recep		62.8462	12.5019	4.69403	20.5619	45.408	58.8756	43.1984	126.133	383.098		OK		7	2	1	3	5	6	4	8	9		0	0	0	0	0	0	0	0	0		7	2	1	3	5	6	4	8	9		4
GB19683	GB50866	FBgn0010435	AmSCR-B10	Scav. Receptor A	Scav. Recep		9.85858	7.61295	7.94748	11.0658	14.6299	18.6905	7.31136	15.5045	16.4213		OK		4	2	3	5	6	9	1	7	8		0	0	0	0	0	0	0	0	0		4	2	3	5	6	9	1	7	8		4
GB19916	GB44045	FBgn0015924	AmSCR-B9	Scav. Receptor A	Scav. Recep		0.996672	1.4029	1.22479	1.60735	1.2512	5.65598	8.16171	5.13758	5.39134		OK		1	4	2	5	3	8	9	6	7		0	0	0	0	0	0	0	0	0		1	4	2	5	3	8	9	6	7		4
GB19925	GB54506	FBgn0014033	AmSCR-C	Scav. Receptor A	Scav. Recep		6.57734	5.56526	4.59949	5.8105	2.9321	10.1028	5.21558	10.5186	13.4892		OK		6	4	2	5	1	7	3	8	9		0	0	0	0	0	0	0	0	0		6	4	2	5	1	7	3	8	9		4
GB18313	GB43738	FBgn0033367	PPO	PPO - melanization	PPO - melan		3.1739	2.36253	1.75516	1.08237	1.51314	0.783498	2.11137	4.22462	3.73419		OK		7	6	4	2	3	1	5	9	8		0	0	0	0	0	0	0	0	0		7	6	4	2	3	1	5	9	8		4
GB18767	GB50013	FBgn0036891	PPOAct	PPO - melanization	PPO - melan		11.7536	11.228	12.2187	9.82204	30.95	9.89807	10.3373	7.41577	9.36247		OK		7	6	8	3	9	4	5	1	2		0	0	0	0	0	0	0	0	0		7	6	8	3	9	4	5	1	2		4
GB10231	GB40163	FBgn0034539	CG11159	Lysozyme	Lysozyme		277.364	13.0042	19.0153	23.6705	17.1012	0	1.88161	24.1609	12.6885		OK		9	4	6	7	5	1	2	8	3		0	0	0	0	0	0	0	0	0		9	4	6	7	5	1	2	8	3		4
GB19988	GB47104	FBgn0025827		Lysozyme	Lysozyme		147.818	66.4788	116.478	64.1505	42.5948	161.739	100.019	395.962	133.889		OK		7	3	5	2	1	8	4	9	6		0	0	0	0	0	0	0	0	0		7	3	5	2	1	8	4	9	6		4
GB10567	GB49149	FBgn0004647	Notch	JNK cascade ; GO:0007254	JNK cascade		275.257	294.118	282.109	141.317	33.1423	73.1608	166.271	68.4625	129.32		OK		7	9	8	5	1	3	6	2	4		0	0	0	0	0	0	0	0	0		7	9	8	5	1	3	6	2	4		4
GB11373	GB45558	FBgn0010333	Rac1	JNK cascade ; GO:0007254	JNK cascade		3.64035	5.24465	4.65015	4.85376	3.8198	2.52251	12.4441	7.25842	4.37179		OK		2	7	5	6	3	1	9	8	4		0	0	0	0	0	0	0	0	0		2	7	5	6	3	1	9	8	4		4
GB11819	GB47961	FBgn0024329	Mekk1	JNK cascade ; GO:0007254	JNK cascade		0.352593	0.288852	0.293112	0.355675	0.53935	1.2288	1.99394	1.2317	2.1888		OK		3	1	2	4	5	6	8	7	9		0	0	0	0	0	0	0	0	0		3	1	2	4	5	6	8	7	9		4
gb12004	GB53318	FBgn0001291	Jun-related antigen	JNK cascade ; GO:0007254	JNK cascade		8.67555	3.84165	4.22296	4.21554	8.39903	3.70843	1.54738	2.76866	14.7824		OK		8	4	6	5	7	3	1	2	9		0	0	0	0	0	0	0	0	0		8	4	6	5	7	3	1	2	9		4
GB12212	GB42049	FBgn0001297	kayak	JNK cascade ; GO:0007254	JNK cascade		21.8366	21.6965	17.0415	16.9234	17.4052	7.43517	13.7166	34.4367	30.0673		OK		7	6	4	3	5	1	2	9	8		0	0	0	0	0	0	0	0	0		7	6	4	3	5	1	2	9	8		4
GB12587	GB49368	FBgn0014011	Rac2	JNK cascade ; GO:0007254	JNK cascade		1.17745	1.1309	0.651126	0.642459	0.40825	2.32528	0.875917	2.65226	4.36581		OK		6	5	3	2	1	7	4	8	9		0	0	0	0	0	0	0	0	0		6	5	3	2	1	7	4	8	9		4
GB12838	GB43176	FBgn0015286	Ras-related protein	JNK cascade ; GO:0007254	JNK cascade		2.27959	2.18947	1.12054	2.13228	1.05385	102.042	2.69591	38.2783	148.676		OK		5	4	2	3	1	8	6	7	9		0	0	0	0	0	0	0	0	0		5	4	2	3	1	8	6	7	9		4
GB13135	GB47431	FBgn0014020	Rho1	JNK cascade ; GO:0007254	JNK cascade		16.9209	10.3297	12.4234	13.3013	12.4299	2.83189	10.5855	14.9759	13.0879		OK		9	2	4	7	5	1	3	8	6		0	0	0	0	0	0	0	0	0		9	2	4	7	5	1	3	8	6		4
GB14469	GB44237	FBgn0004636	Roughened	JNK cascade ; GO:0007254	JNK cascade		69.706	66.117	67.2827	73.6266	47.8546	61.7729	96.54	179.351	131.545		OK		5	3	4	6	1	2	7	9	8		0	0	0	0	0	0	0	0	0		5	3	4	6	1	2	7	9	8		4
GB14925	GB50631	FBgn0010341	Cdc42	JNK cascade ; GO:0007254	JNK cascade		9.46203	11.667	10.3314	8.87051	15.5169	22.3055	39.2921	11.39	5.10576		OK		3	6	4	2	7	8	9	5	1		0	0	0	0	0	0	0	0	0		3	6	4	2	7	8	9	5	1		4
GB15424	GB53394	FBgn0003371	shaggy	JNK cascade ; GO:0007254	JNK cascade		44.6739	35.1274	37.1795	32.4144	23.0548	49.1245	60.0876	120.404	98.5215		OK		5	3	4	2	1	6	7	9	8		0	0	0	0	0	0	0	0	0		5	3	4	2	1	6	7	9	8		4
GB16401	GB56012	FBgn0000229	basket	JNK cascade ; GO:0007254	JNK cascade		313.2	286.753	188.234	47.992	52.0039	661.851	1519.27	207.66	180.323		OK		7	6	4	1	2	8	9	5	3		0	0	0	0	0	0	0	0	0		7	6	4	1	2	8	9	5	3		4
GB16764	GB44888	FBgn0033483	eiger	JNK cascade ; GO:0007254	JNK cascade		45.9587	6.56581	2.95428	10.2175	21.4205	21.9257	27.6674	72.6611	189.462		OK		7	2	1	3	4	5	6	8	9		0	0	0	0	0	0	0	0	0		7	2	1	3	4	5	6	8	9		4
GB17167	GB51894	FBgn0010303	hemipterous	JNK cascade ; GO:0007254	JNK cascade		1.48677	1.47724	1.41755	1.17889	2.17754	1.68744	3.56452	2.04721	2.85141		OK		4	3	2	1	7	5	9	6	8		0	0	0	0	0	0	0	0	0		4	3	2	1	7	5	9	6	8		4
GB17935	GB45540	FBgn0000097	anterior open	JNK cascade ; GO:0007254	JNK cascade		3.7372	3.06993	4.35087	2.35729	3.92143	6.15035	5.99364	7.55223	8.55544		OK		3	2	5	1	4	7	6	8	9		0	0	0	0	0	0	0	0	0		3	2	5	1	4	7	6	8	9		4
GB20112	GB45657	FBgn0010341	Cdc42	JNK cascade ; GO:0007254	JNK cascade		8.7603	9.44194	6.43001	8.80597	7.62788	6.00161	9.82184	18.6696	9.83616		OK		4	6	2	5	3	1	7	9	8		0	0	0	0	0	0	0	0	0		4	6	2	5	3	1	7	9	8		4
GB19901	GB44634	FBgn0243512		JNK cascade	JNK cascade		53.1117	51.3321	149.782	60.072	78.6285	117.964	77.3535	149.361	138.707		OK		2	1	9	3	5	6	4	8	7		0	0	0	0	0	0	0	0	0		2	1	9	3	5	6	4	8	7		4
GB11408	GB52985	FBgn0043884	multiple ankyrin repeats single KH domain	JAK-STAT cascade ; GO:0007259 and children	JAK-STAT ca		10.8066	7.50257	10.8649	7.29108	10.0055	4.25779	3.84931	9.27151	7.97525		OK		8	4	9	3	7	2	1	6	5		0	0	0	0	0	0	0	0	0		8	4	9	3	7	2	1	6	5		4
GB12007	GB40911	FBgn0003612	Suppressor of variegation 2-10	JAK-STAT cascade ; GO:0007259 and children	JAK-STAT ca		1.23686	1.20712	0.661916	0.777507	0.622523	2.62647	2.55714	2.69621	4.55196		OK		5	4	2	3	1	7	6	8	9		0	0	0	0	0	0	0	0	0		5	4	2	3	1	7	6	8	9		4
GB12159	GB42244	FBgn0043903	domeless	JAK-STAT cascade ; GO:0007259 and children	JAK-STAT ca		1.18217	1.05845	1.13265	1.07766	1.70207	2.11038	1.57082	2.09256	2.57169		OK		4	1	3	2	6	8	5	7	9		0	0	0	0	0	0	0	0	0		4	1	3	2	6	8	5	7	9		4
GB14092	GB42304	FBgn0001319	knot	JAK-STAT cascade ; GO:0007259 and children	JAK-STAT ca		14.4306	6.87591	4.84901	9.79839	21.9877	27.2737	11.1448	46.8076	147.995		OK		5	2	1	3	6	7	4	8	9		0	0	0	0	0	0	0	0	0		5	2	1	3	6	7	4	8	9		4
GB16422	GB44594	FBgn0004864	hopscotch	JAK-STAT cascade ; GO:0007259 and children	JAK-STAT ca		1.23532	1.09156	0.819754	0.866617	1.32778	1.62638	2.05001	2.27668	2.88917		OK		4	3	1	2	5	6	7	8	9		0	0	0	0	0	0	0	0	0		4	3	1	2	5	6	7	8	9		4
GB18923	GB50020	FBgn0016917	Signal-transducer and activator of transcription protein at 92E	JAK-STAT cascade ; GO:0007259 and children	JAK-STAT ca		2.18888	1.53222	1.39053	1.38809	2.44403	5.12864	3.20571	8.88866	9.10013		OK		4	3	2	1	5	7	6	8	9		0	0	0	0	0	0	0	0	0		4	3	2	1	5	7	6	8	9		4
GB14250	GB51500	FBgn0085402		JAK-STAT cascade	JAK-STAT ca		4.43564	5.35941	3.34769	5.69935	7.19814	20.666	11.1266	25.632	13.8645		OK		2	3	1	4	5	8	6	9	7		0	0	0	0	0	0	0	0	0		2	3	1	4	5	8	6	9	7		4
GB18949	GB55283	FBgn0041184		JAK-STAT cascade	JAK-STAT ca		1.96279	1.83283	2.34504	1.50871	1.03972	8.2549	4.63314	6.64307	1.78833		OK		5	4	6	2	1	9	7	8	3		0	0	0	0	0	0	0	0	0		5	4	6	2	1	9	7	8	3		4
GB10026	GB44490	FBgn0031213		immune-related	immune-rela		8.66621	6.10083	7.35197	5.29666	10.8411	5.83449	7.77686	9.4782	16.4317		OK		6	3	4	1	8	2	5	7	9		0	0	0	0	0	0	0	0	0		6	3	4	1	8	2	5	7	9		4
GB11320	GB53101	FBgn0020305		immune-related	immune-rela		4.9235	2.53639	3.52024	2.58178	2.63824	11.7857	1.74168	5.6827	5.3618		OK		6	2	5	3	4	9	1	8	7		0	0	0	0	0	0	0	0	0		6	2	5	3	4	9	1	8	7		4
GB11902	GB45882	FBgn0003326		immune-related	immune-rela		1.28454	1.05555	1.89426	1.40178	2.42485	0.939545	1.79682	1.87053	0.895585		OK		4	3	8	5	9	2	6	7	1		0	0	0	0	0	0	0	0	0		4	3	8	5	9	2	6	7	1		4
GB12454	GB48687	not found		immune-related	immune-rela		327.399	297.03	336.376	447.251	350.473	159.986	108.163	213.781	563.08		OK		5	4	6	8	7	2	1	3	9		0	0	0	0	0	0	0	0	0		5	4	6	8	7	2	1	3	9		4
GB12883	GB50507	not found		immune-related	immune-rela		10.1037	6.44978	12.7191	13.8784	28.7305	9.32776	4.12477	17.6622	49.201		OK		4	2	5	6	8	3	1	7	9		0	0	0	0	0	0	0	0	0		4	2	5	6	8	3	1	7	9		4
GB13522	GB47208	FBgn0030018		immune-related	immune-rela		1.05372	0.625098	0.609364	0.402625	0.501461	0.544037	0.744859	2.62318	3.65365		OK		7	5	4	1	2	3	6	8	9		0	0	0	0	0	0	0	0	0		7	5	4	1	2	3	6	8	9		4
GB13979	GB50509	not found		immune-related	immune-rela		5.33415	4.3986	3.60096	3.77491	10.4033	2.07911	3.01225	7.83302	6.00555		OK		6	5	3	4	9	1	2	8	7		0	0	0	0	0	0	0	0	0		6	5	3	4	9	1	2	8	7		4
GB14645	GB50508	FBgn0243514		immune-related	immune-rela		229.946	212.635	224.973	287.833	248.275	134.016	94.0171	161.732	359.881		OK		6	4	5	8	7	2	1	3	9		0	0	0	0	0	0	0	0	0		6	4	5	8	7	2	1	3	9		4
GB14962	GB54664	FBgn0027594		immune-related	immune-rela		2.7117	1.0387	1.07112	1.40915	4.19738	1.06254	2.08747	4.36303	5.06413		OK		6	1	3	4	7	2	5	8	9		0	0	0	0	0	0	0	0	0		6	1	3	4	7	2	5	8	9		4
GB15645	GB45138	FBgn0030505		immune-related	immune-rela		11.6725	9.39367	8.62157	8.73454	16.1033	23.7794	11.0246	26.1167	34.1333		OK		5	3	1	2	6	7	4	8	9		0	0	0	0	0	0	0	0	0		5	3	1	2	6	7	4	8	9		4
GB17018	GB42358	FBgn0087011		immune-related	immune-rela		1.01293	1.8874	1.26967	1.16855	1.12386	4.5342	2.13307	5.06115	10.054		OK		1	5	4	3	2	7	6	8	9		0	0	0	0	0	0	0	0	0		1	5	4	3	2	7	6	8	9		4
GB18324	GB46478	FBgn0052226		immune-related	immune-rela		1.06591	0.676079	0.71673	0.470299	0.906513	1.45631	1.24294	2.47104	4.87579		OK		5	2	3	1	4	7	6	8	9		0	0	0	0	0	0	0	0	0		5	2	3	1	4	7	6	8	9		4
GB19452	GB42685	not found		immune-related	immune-rela		21.3834	11.5911	7.39553	10.8791	4.21763	12.222	11.7602	20.8453	15.3387		OK		9	4	2	3	1	6	5	8	7		0	0	0	0	0	0	0	0	0		9	4	2	3	1	6	5	8	7		4
GB20003	GB42082	FBgn0041780		immune-related	immune-rela		1.80599	1.55201	0.992868	1.03728	0.247177	1.87714	3.07318	3.50361	3.93106		OK		5	4	2	3	1	6	7	8	9		0	0	0	0	0	0	0	0	0		5	4	2	3	1	6	7	8	9		4
GB10009	GB50238	FBgn0003884	alpha-Tubulin at 84B	Immune system process (GO:0002376)	Immune syst		12.685	8.50364	17.1791	12.5514	57.087	14.9966	11.9994	7.42173	3.83954		OK		6	3	8	5	9	7	4	2	1		0	0	0	0	0	0	0	0	0		6	3	8	5	9	7	4	2	1		4
GB10069	GB51712	FBgn0261560	Thor	Immune system process (GO:0002376)	Immune syst		23.432	21.8781	24.3211	14.9175	20.8776	29.4979	54.8637	22.1756	15.7097		OK		6	4	7	1	3	8	9	5	2		0	0	0	0	0	0	0	0	0		6	4	7	1	3	8	9	5	2		4
GB10124	GB46739	FBgn0013576	mustard	Immune system process (GO:0002376)	Immune syst		100.703	126.368	92.4845	113.532	32.0482	89.5333	144.076	114.931	132.793		OK		4	7	3	5	1	2	9	6	8		0	0	0	0	0	0	0	0	0		4	7	3	5	1	2	9	6	8		4
GB10171	GB55582	FBgn0261617	nejire	Immune system process (GO:0002376)	Immune syst		0.680487	0.326793	0.278746	0.235745	0.262157	2.48863	0.951871	0.928987	0.646961		OK		6	4	3	1	2	9	8	7	5		0	0	0	0	0	0	0	0	0		6	4	3	1	2	9	8	7	5		4
GB10274	GB52588	FBgn0010247		Immune system process (GO:0002376)	Immune syst		1.59603	2.01133	1.7573	1.46951	2.46979	3.31409	2.59895	2.74186	2.62744		OK		2	4	3	1	5	9	6	8	7		0	0	0	0	0	0	0	0	0		2	4	3	1	5	9	6	8	7		4
GB10471	GB45135	FBgn0028982	Spt6	Immune system process (GO:0002376)	Immune syst		1.95988	1.24979	1.76686	1.22716	3.64833	5.49902	2.89573	4.27655	3.25317		OK		4	2	3	1	7	9	5	8	6		0	0	0	0	0	0	0	0	0		4	2	3	1	7	9	5	8	6		4
GB10524	GB55808	FBgn0020306		Immune system process (GO:0002376)	Immune syst		3.28272	0.832678	0.879838	0.926339	1.40164	16.2874	0.880724	7.50021	14.8085		OK		6	1	2	4	5	9	3	7	8		0	0	0	0	0	0	0	0	0		6	1	2	4	5	9	3	7	8		4
GB10574	GB43216	FBgn0261547	Ephexin	Immune system process (GO:0002376)	Immune syst		4.09893	3.71818	3.2648	3.37792	3.23	6.63209	4.2094	7.99801	12.6357		OK		5	4	2	3	1	7	6	8	9		0	0	0	0	0	0	0	0	0		5	4	2	3	1	7	6	8	9		4
GB10654	GB47452	FBgn0261797	Dynein heavy chain 64C	Immune system process (GO:0002376)	Immune syst		1.96777	0.744669	0.83577	0.501855	1.65066	5.73058	1.31803	4.19666	5.14692		OK		6	2	3	1	5	9	4	7	8		0	0	0	0	0	0	0	0	0		6	2	3	1	5	9	4	7	8		4
GB10667	GB50038	FBgn0001108	Glued	Immune system process (GO:0002376)	Immune syst		3.22978	1.92506	2.09711	2.26759	2.30323	1.05552	3.13279	2.7675	4.57333		OK		8	2	3	4	5	1	7	6	9		0	0	0	0	0	0	0	0	0		8	2	3	4	5	1	7	6	9		4
GB10718	GB53167	FBgn0085432		Immune system process (GO:0002376)	Immune syst		16.9957	15.3687	22.2189	18.0396	20.2174	21.4239	29.6425	64.7935	103.654		OK		2	1	6	3	4	5	7	8	9		0	0	0	0	0	0	0	0	0		2	1	6	3	4	5	7	8	9		4
GB10863	GB41845	FBgn0036844	Mitogen-activated protein kinase phosphatase 3	Immune system process (GO:0002376)	Immune syst		1.42996	0.987153	1.1532	1.32362	3.61522	0.980541	1.55132	1.83014	5.2681		OK		5	2	3	4	8	1	6	7	9		0	0	0	0	0	0	0	0	0		5	2	3	4	8	1	6	7	9		4
GB10917	GB52158	FBgn0031975	Transglutaminase	Immune system process (GO:0002376)	Immune syst		9.21304	7.12022	7.87257	10.3212	27.5609	12.9758	2.74638	11.0565	11.4887		OK		4	2	3	5	9	8	1	6	7		0	0	0	0	0	0	0	0	0		4	2	3	5	9	8	1	6	7		4
GB10996	GB53462	FBgn0005630	longitudinals lacking	Immune system process (GO:0002376)	Immune syst		3.40169	2.57938	3.96027	3.48889	8.69068	120.214	2.45885	34.0962	9.19166		OK		3	2	5	4	6	9	1	8	7		0	0	0	0	0	0	0	0	0		3	2	5	4	6	9	1	8	7		4
GB11052	GB43375	FBgn0040324	Ephrin	Immune system process (GO:0002376)	Immune syst		4.83919	3.9268	5.95182	2.96422	8.89863	7.14468	3.55837	8.67295	8.09985		OK		4	3	5	1	9	6	2	8	7		0	0	0	0	0	0	0	0	0		4	3	5	1	9	6	2	8	7		4
GB11073	GB53490	FBgn0005630	longitudinals lacking	Immune system process (GO:0002376)	Immune syst		24.6991	19.6681	27.0229	22.8869	15.2925	5.8068	28.7004	46.9655	65.415		OK		5	3	6	4	2	1	7	8	9		0	0	0	0	0	0	0	0	0		5	3	6	4	2	1	7	8	9		4
GB11075	GB47732	FBgn0260936	scrawny	Immune system process (GO:0002376)	Immune syst		0.725544	0.647086	0.318432	0.350101	0.658857	1.59205	1.66074	2.05175	1.67523		OK		5	3	1	2	4	6	7	9	8		0	0	0	0	0	0	0	0	0		5	3	1	2	4	6	7	9	8		4
GB11202	GB49929	FBgn0002526	Laminin A	Immune system process (GO:0002376)	Immune syst		1.82504	1.17838	0.987244	1.10948	2.63408	89.271	2.34856	33.2062	52.2031		OK		4	3	1	2	6	9	5	7	8		0	0	0	0	0	0	0	0	0		4	3	1	2	6	9	5	7	8		4
GB11241	GB45708	FBgn0031975	Transglutaminase	Immune system process (GO:0002376)	Immune syst		96.321	119.786	136.769	162.405	257.509	21.0219	29.8807	86.073	123.085		OK		4	5	7	8	9	1	2	3	6		0	0	0	0	0	0	0	0	0		4	5	7	8	9	1	2	3	6		4
GB11364	GB47224	FBgn0000568	Ecdysone-induced protein 75B	Immune system process (GO:0002376)	Immune syst		64.1353	34.4933	197.607	45.5799	57.9963	18.479	32.4127	97.2715	125.359		OK		6	3	9	4	5	1	2	7	8		0	0	0	0	0	0	0	0	0		6	3	9	4	5	1	2	7	8		4
GB11410	GB52999	FBgn0027932	A kinase anchor protein 200	Immune system process (GO:0002376)	Immune syst		314.646	209.173	221.995	308.624	324.801	481.847	331.287	870.257	839.153		OK		4	1	2	3	5	7	6	9	8		0	0	0	0	0	0	0	0	0		4	1	2	3	5	7	6	9	8		4
GB11411	GB45655	FBgn0004837	Suppressor of Hairless	Immune system process (GO:0002376)	Immune syst		0.902839	0.751528	0.332845	0.750663	2.19125	0	0.137771	1.47904	1.37337		OK		6	5	3	4	9	1	2	8	7		0	0	0	0	0	0	0	0	0		6	5	3	4	9	1	2	8	7		4
GB11564	GB43099	FBgn0028982	Spt6	Immune system process (GO:0002376)	Immune syst		3.69354	2.07809	3.55995	2.8226	3.2016	3.09884	2.9839	3.59638	4.64767		OK		8	1	6	2	5	4	3	7	9		0	0	0	0	0	0	0	0	0		8	1	6	2	5	4	3	7	9		4
GB11581	GB53848	FBgn0036752	Adenosine deaminase-related growth factor A	Immune system process (GO:0002376)	Immune syst		1.97588	2.09637	1.89168	1.71925	4.38135	6.35219	3.78645	4.04614	3.66969		OK		3	4	2	1	8	9	6	7	5		0	0	0	0	0	0	0	0	0		3	4	2	1	8	9	6	7	5		4
GB11734	GB41654	FBgn0013799	Deformed epidermal autoregulatory factor-1	Immune system process (GO:0002376)	Immune syst		1.09682	1.30133	1.82358	1.25728	0.447405	0	0.775325	3.03875	3.49639		OK		4	6	7	5	2	1	3	8	9		0	0	0	0	0	0	0	0	0		4	6	7	5	2	1	3	8	9		4
GB11906	GB45526	FBgn0021895		Immune system process (GO:0002376)	Immune syst		5.84751	4.79878	4.77545	3.4041	6.54438	14.1304	7.58185	10.1555	43.279		OK		4	3	2	1	5	8	6	7	9		0	0	0	0	0	0	0	0	0		4	3	2	1	5	8	6	7	9		4
GB11941	GB43092	FBgn0013762	Cyclin-dependent kinase 5	Immune system process (GO:0002376)	Immune syst		15.9947	14.0613	16.8706	13.625	21.903	10.4605	18.0522	11.2023	5.86969		OK		6	5	7	4	9	2	8	3	1		0	0	0	0	0	0	0	0	0		6	5	7	4	9	2	8	3	1		4
GB12005	GB42215	FBgn0004657	myospheroid	Immune system process (GO:0002376)	Immune syst		1.94827	1.39044	1.1306	1.70847	3.56521	1.9594	1.08391	2.9368	4.63072		OK		5	3	2	4	8	6	1	7	9		0	0	0	0	0	0	0	0	0		5	3	2	4	8	6	1	7	9		4
GB12053	GB50037	FBgn0003884	alpha-Tubulin at 84B	Immune system process (GO:0002376)	Immune syst		1.86709	2.20085	0.556229	2.2933	0.49043	3.35203	1.03605	1.1586	2.58198		OK		5	6	2	7	1	9	3	4	8		0	0	0	0	0	0	0	0	0		5	6	2	7	1	9	3	4	8		4
GB12064	GB50654	FBgn0032363	CG6509	Immune system process (GO:0002376)	Immune syst		0.781179	0.719548	0.41704	0.668808	0.466224	3.20345	1.45832	4.14342	6.83034		OK		5	4	1	3	2	7	6	8	9		0	0	0	0	0	0	0	0	0		5	4	1	3	2	7	6	8	9		4
GB12173	GB54228	FBgn0029113	Smt3 activating enzyme 2	Immune system process (GO:0002376)	Immune syst		0.620355	0.978866	1.03461	0.552635	0.512124	2.528	3.51611	1.93576	2.19066		OK		3	4	5	2	1	8	9	6	7		0	0	0	0	0	0	0	0	0		3	4	5	2	1	8	9	6	7		4
GB12207	GB54477	FBgn0003731	Epidermal growth factor receptor	Immune system process (GO:0002376)	Immune syst		15.0639	12.2097	11.9615	11.4764	8.83896	29.7041	11.3505	31.4057	32.0004		OK		6	5	4	3	1	7	2	8	9		0	0	0	0	0	0	0	0	0		6	5	4	3	1	7	2	8	9		4
GB12209	GB55970	FBgn0005655	mutagen-sensitive 209	Immune system process (GO:0002376)	Immune syst		2.20211	2.4462	1.66742	1.54312	2.50652	3.80707	5.58787	2.86963	1.52263		OK		4	5	3	2	6	8	9	7	1		0	0	0	0	0	0	0	0	0		4	5	3	2	6	8	9	7	1		4
GB12228	GB55583	FBgn0261617	nejire	Immune system process (GO:0002376)	Immune syst		3.2844	2.16768	2.25517	2.09147	3.28255	5.78915	3.23515	5.67826	7.39695		OK		6	2	3	1	5	8	4	7	9		0	0	0	0	0	0	0	0	0		6	2	3	1	5	8	4	7	9		4
GB12280	GB44534	FBgn0039141	spastin	Immune system process (GO:0002376)	Immune syst		6.90114	0.684116	0.427926	1.38184	1.26225	2.08391	1.05068	1.42616	5.95921		OK		9	2	1	5	4	7	3	6	8		0	0	0	0	0	0	0	0	0		9	2	1	5	4	7	3	6	8		4
GB12288	GB42607	FBgn0264294	Cytochrome b5	Immune system process (GO:0002376)	Immune syst		12.5796	8.74786	10.7911	8.53208	33.8452	12.3676	5.32878	27.6	28.4239		OK		6	3	4	2	9	5	1	7	8		0	0	0	0	0	0	0	0	0		6	3	4	2	9	5	1	7	8		4
GB12298	GB48789	FBgn0032363	CG6509	Immune system process (GO:0002376)	Immune syst		1.31237	0.432625	0.293848	0.424791	1.02189	1.09819	0.521874	1.41204	6.7884		OK		7	3	1	2	5	6	4	8	9		0	0	0	0	0	0	0	0	0		7	3	1	2	5	6	4	8	9		4
GB12312	GB47313	FBgn0003261	Rm62	Immune system process (GO:0002376)	Immune syst		12.7955	7.23723	8.38622	5.31938	9.61242	4.21153	5.0441	11.3543	8.31281		OK		9	4	6	3	7	1	2	8	5		0	0	0	0	0	0	0	0	0		9	4	6	3	7	1	2	8	5		4
GB12357	GB42600	FBgn0036844	Mitogen-activated protein kinase phosphatase 3	Immune system process (GO:0002376)	Immune syst		1.57881	1.83563	0.970085	1.10111	1.87272	9.29902	3.89913	12.0813	12.3242		OK		3	4	1	2	5	7	6	8	9		0	0	0	0	0	0	0	0	0		3	4	1	2	5	7	6	8	9		4
GB12373	GB46510	FBgn0010247	Poly-(ADP-ribose) polymerase	Immune system process (GO:0002376)	Immune syst		0.69016	0.464014	0.390138	0.49493	0.717886	0.363457	1.32699	0.791442	1.25982		OK		5	3	2	4	6	1	9	7	8		0	0	0	0	0	0	0	0	0		5	3	2	4	6	1	9	7	8		4
GB12465	GB45757	FBgn0003896	tailup	Immune system process (GO:0002376)	Immune syst		6.14306	7.6211	3.50494	8.83574	10.5229	20.7008	19.9201	40.2846	57.5697		OK		2	3	1	4	5	7	6	8	9		0	0	0	0	0	0	0	0	0		2	3	1	4	5	7	6	8	9		4
GB12478	GB49992	FBgn0021895	yantar	Immune system process (GO:0002376)	Immune syst		4.91115	5.28978	6.81119	5.08597	4.25703	8.77509	11.0407	7.47084	7.404		OK		2	4	5	3	1	8	9	7	6		0	0	0	0	0	0	0	0	0		2	4	5	3	1	8	9	7	6		4
GB12556	GB55472	FBgn0003205	Ras oncogene at 85D	Immune system process (GO:0002376)	Immune syst		12.1878	6.84116	13.7617	7.71117	25.5195	12.5034	3.57775	7.77906	4.51455		OK		6	3	8	4	9	7	1	5	2		0	0	0	0	0	0	0	0	0		6	3	8	4	9	7	1	5	2		4
GB12585	GB41629	FBgn0025936	Eph receptor tyrosine kinase	Immune system process (GO:0002376)	Immune syst		7.32207	5.85643	4.82818	8.17335	14.8609	18.138	7.15363	21.3154	42.7868		OK		4	2	1	5	6	7	3	8	9		0	0	0	0	0	0	0	0	0		4	2	1	5	6	7	3	8	9		4
GB12639	GB55272	FBgn0011202	diaphanous	Immune system process (GO:0002376)	Immune syst		3.00194	4.07318	2.4008	3.23137	6.98027	27.9167	3.6538	15.3682	23.9875		OK		2	5	1	3	6	9	4	7	8		0	0	0	0	0	0	0	0	0		2	5	1	3	6	9	4	7	8		4
GB12643	GB55408	FBgn0030964	PDGF- and VEGF-related factor 1	Immune system process (GO:0002376)	Immune syst		13.7137	12.7385	10.1465	10.8375	18.4271	51.541	16.8355	27.5966	82.4238		OK		4	3	1	2	6	8	5	7	9		0	0	0	0	0	0	0	0	0		4	3	1	2	6	8	5	7	9		4
GB12742	GB53016	FBgn0085407	PDGF- and VEGF-related factor 3	Immune system process (GO:0002376)	Immune syst		11.4036	10.206	7.59073	12.9966	28.1565	26.7287	15.2758	27.2439	38.1925		OK		3	2	1	4	8	6	5	7	9		0	0	0	0	0	0	0	0	0		3	2	1	4	8	6	5	7	9		4
GB12839	GB46452	FBgn0000996	double parked	Immune system process (GO:0002376)	Immune syst		1.00467	0.889565	0.713766	0.464978	0.489857	1.86007	1.6888	3.086	2.05959		OK		5	4	3	1	2	7	6	9	8		0	0	0	0	0	0	0	0	0		5	4	3	1	2	7	6	9	8		4
GB13057	GB40690	FBgn0264707	RhoGEF3	Immune system process (GO:0002376)	Immune syst		8.57084	8.72006	8.53891	6.50902	6.7925	32.7239	16.7947	37.434	46.1326		OK		4	5	3	1	2	7	6	8	9		0	0	0	0	0	0	0	0	0		4	5	3	1	2	7	6	8	9		4
GB13109	GB44213	FBgn0014141	cheerio	Immune system process (GO:0002376)	Immune syst		4.86152	4.87388	2.88785	6.46842	18.3329	9.18504	6.10182	9.32367	13.5728		OK		2	3	1	5	9	6	4	7	8		0	0	0	0	0	0	0	0	0		2	3	1	5	9	6	4	7	8		4
GB13113	GB50397	FBgn0021873	Gef26	Immune system process (GO:0002376)	Immune syst		11.2307	15.9593	12.631	10.0267	11.9063	10.1909	10.5876	13.7181	14.4239		OK		4	9	6	1	5	2	3	7	8		0	0	0	0	0	0	0	0	0		4	9	6	1	5	2	3	7	8		4
GB13159	GB53150	FBgn0263289	scribbled	Immune system process (GO:0002376)	Immune syst		3.85751	2.85907	1.52077	3.16328	3.71096	6.89878	3.50891	6.16419	6.55055		OK		6	2	1	3	5	9	4	7	8		0	0	0	0	0	0	0	0	0		6	2	1	3	5	9	4	7	8		4
GB13170	GB46539	FBgn0040068	vav	Immune system process (GO:0002376)	Immune syst		3.96116	2.62479	2.08286	2.15245	7.16429	4.13701	5.60146	4.40676	4.88857		OK		4	3	1	2	9	5	8	6	7		0	0	0	0	0	0	0	0	0		4	3	1	2	9	5	8	6	7		4
GB13192	GB49985	FBgn0259984		Immune system process (GO:0002376)	Immune syst		23.2881	23.0289	12.92	26.4359	21.9146	55.6109	61.5861	54.9284	99.2526		OK		4	3	1	5	2	7	8	6	9		0	0	0	0	0	0	0	0	0		4	3	1	5	2	7	8	6	9		4
GB13202	GB40333	FBgn0040324	Ephrin	Immune system process (GO:0002376)	Immune syst		36.1299	32.9888	26.4872	37.2278	56.4526	101.055	50.667	102.246	144.181		OK		3	2	1	4	6	7	5	8	9		0	0	0	0	0	0	0	0	0		3	2	1	4	6	7	5	8	9		4
GB13381	GB52563	FBgn0000212	brahma	Immune system process (GO:0002376)	Immune syst		8.44893	6.51394	8.78781	5.01869	5.60301	15.3284	9.40751	31.0071	56.8336		OK		4	3	5	1	2	7	6	8	9		0	0	0	0	0	0	0	0	0		4	3	5	1	2	7	6	8	9		4
GB13405	GB54530	FBgn0031216	CG11376	Immune system process (GO:0002376)	Immune syst		0.380459	0.316696	0.264939	0.296561	0.505671	3.5063	0.47897	2.18146	5.85978		OK		4	3	1	2	6	8	5	7	9		0	0	0	0	0	0	0	0	0		4	3	1	2	6	8	5	7	9		4
GB13459	GB51481	FBgn0031464	Dual oxidase	Immune system process (GO:0002376)	Immune syst		4.48239	5.51	4.70675	5.51469	8.43767	7.04642	6.50822	6.74719	6.77397		OK		1	3	2	4	9	8	5	6	7		0	0	0	0	0	0	0	0	0		1	3	2	4	9	8	5	6	7		4
GB13523	GB53472	FBgn0005630	longitudinals lacking	Immune system process (GO:0002376)	Immune syst		3.65951	3.28051	3.44778	2.56727	5.70978	9.63598	2.16392	10.4914	14.9606		OK		5	3	4	2	6	7	1	8	9		0	0	0	0	0	0	0	0	0		5	3	4	2	6	7	1	8	9		4
GB13567	GB41547	FBgn0259099	Doublecortin-domain-containing echinoderm-microtubule-associated protein ortholog	Immune system process (GO:0002376)	Immune syst		5.28683	6.9183	5.30137	7.20023	5.96259	17.9834	22.7069	13.8044	14.014		OK		1	4	2	5	3	8	9	6	7		0	0	0	0	0	0	0	0	0		1	4	2	5	3	8	9	6	7		4
GB13582	GB54852	FBgn0032006	PDGF- and VEGF-receptor related	Immune system process (GO:0002376)	Immune syst		1.71923	1.23845	1.0375	1.38797	1.3838	2.42516	1.96763	2.95478	4.29064		OK		5	2	1	4	3	7	6	8	9		0	0	0	0	0	0	0	0	0		5	2	1	4	3	7	6	8	9		4
GB13642	GB41009	FBgn0031975	Transglutaminase	Immune system process (GO:0002376)	Immune syst		2.95121	2.48023	1.81335	4.31328	6.39536	0	0	0.755426	1.05218		OK		7	6	5	8	9	1	1	3	4		0	0	0	0	0	0.5	0.5	0	0		7	6	5	8	9	1.5	1.5	3	4		4
GB13665	GB49498	FBgn0038046	CG5641	Immune system process (GO:0002376)	Immune syst		1.74651	1.90946	1.68961	1.76689	2.70569	2.93541	3.01954	2.20675	2.75567		OK		2	4	1	3	6	8	9	5	7		0	0	0	0	0	0	0	0	0		2	4	1	3	6	8	9	5	7		4
GB13670	GB46338	FBgn0043550	Tetraspanin 68C	Immune system process (GO:0002376)	Immune syst		0.607891	0.766316	0.490237	0.503455	1.84424	1.75072	1.02184	2.87865	14.6292		OK		3	4	1	2	7	6	5	8	9		0	0	0	0	0	0	0	0	0		3	4	1	2	7	6	5	8	9		4
GB13747	GB47828	FBgn0011764		Immune system process (GO:0002376)	Immune syst		2.48072	1.92334	2.13029	2.09675	4.30062	5.31222	4.01925	5.75318	6.30828		OK		4	1	3	2	6	7	5	8	9		0	0	0	0	0	0	0	0	0		4	1	3	2	6	7	5	8	9		4
GB13819	GB51694	FBgn0003447	singed	Immune system process (GO:0002376)	Immune syst		1.5109	1.71388	1.07242	1.25894	0.858056	7.54526	8.2435	1.9204	1.7832		OK		4	5	2	3	1	8	9	7	6		0	0	0	0	0	0	0	0	0		4	5	2	3	1	8	9	7	6		4
GB13884	GB49904	FBgn0000490	decapentaplegic	Immune system process (GO:0002376)	Immune syst		0.897818	0.258698	0.330994	0.279933	1.55648	117.613	0.462391	172.454	234.821		OK		5	1	3	2	6	7	4	8	9		0	0	0	0	0	0	0	0	0		5	1	3	2	6	7	4	8	9		4
GB13967	GB40759	FBgn0043841	virus-induced RNA 1	Immune system process (GO:0002376)	Immune syst		195.242	67.0895	66.3679	67.0634	62.615	25.7946	22.3255	61.0531	80.1774		OK		9	7	5	6	4	2	1	3	8		0	0	0	0	0	0	0	0	0		9	7	5	6	4	2	1	3	8		4
GB14060	GB48932	FBgn0260935	immune response deficient 1	Immune system process (GO:0002376)	Immune syst		4.40343	3.98056	3.86218	3.54007	3.89178	17.9606	17.1644	3.14718	4.77752		OK		6	5	3	2	4	9	8	1	7		0	0	0	0	0	0	0	0	0		6	5	3	2	4	9	8	1	7		4
GB14141	GB52278	FBgn0014141	cheerio	Immune system process (GO:0002376)	Immune syst		22.1315	37.3291	24.4383	46.0444	65.6391	32.4917	55.7969	42.8424	53.9502		OK		1	4	2	6	9	3	8	5	7		0	0	0	0	0	0	0	0	0		1	4	2	6	9	3	8	5	7		4
GB14169	GB50932	FBgn0003117	pannier	Immune system process (GO:0002376)	Immune syst		3.27224	2.18184	1.97737	2.63497	3.2818	4.27253	2.92483	7.64224	10.4901		OK		5	2	1	3	6	7	4	8	9		0	0	0	0	0	0	0	0	0		5	2	1	3	6	7	4	8	9		4
GB14289	GB51067	FBgn0082598	akirin	Immune system process (GO:0002376)	Immune syst		2.16012	1.95269	2.10802	1.11426	1.37678	2.09114	7.87111	3.90304	4.25841		OK		6	3	5	1	2	4	9	7	8		0	0	0	0	0	0	0	0	0		6	3	5	1	2	4	9	7	8		4
GB14441	GB56005	FBgn0026379	Pten	Immune system process (GO:0002376)	Immune syst		1.74458	0.394261	0.788192	0.319968	1.06745	2.36441	0.411072	1.05073	2.19524		OK		7	2	4	1	6	9	3	5	8		0	0	0	0	0	0	0	0	0		7	2	4	1	6	9	3	5	8		4
GB14446	GB44948	FBgn0259099	Doublecortin-domain-containing echinoderm-microtubule-associated protein ortholog	Immune system process (GO:0002376)	Immune syst		4.10851	3.69946	3.33587	7.72033	11.765	6.51993	6.61234	8.4884	9.41648		OK		3	2	1	6	9	4	5	7	8		0	0	0	0	0	0	0	0	0		3	2	1	6	9	4	5	7	8		4
GB14487	GB44982	FBgn0010395	beta[nu] integrin	Immune system process (GO:0002376)	Immune syst		2.0454	2.0768	0.682251	0.979386	0.658532	2.88525	2.50812	1.6754	3.58367		OK		5	6	2	3	1	8	7	4	9		0	0	0	0	0	0	0	0	0		5	6	2	3	1	8	7	4	9		4
GB14518	GB55704	FBgn0026207	members only	Immune system process (GO:0002376)	Immune syst		10.0512	7.61303	5.09035	8.35582	13.7413	164.864	11.3395	102.669	32.0048		OK		4	2	1	3	6	9	5	8	7		0	0	0	0	0	0	0	0	0		4	2	1	3	6	9	5	8	7		4
GB14545	GB42785	FBgn0039702	Vacuolar protein sorting 16B	Immune system process (GO:0002376)	Immune syst		5.93821	6.73761	7.37757	5.59517	12.3309	10.3095	9.26071	7.61677	5.3975		OK		3	4	5	2	9	8	7	6	1		0	0	0	0	0	0	0	0	0		3	4	5	2	9	8	7	6	1		4
GB14602	GB43446	FBgn0040505		Immune system process (GO:0002376)	Immune syst		4.1135	3.23724	3.01713	3.47499	4.77906	4.25317	3.58632	5.64507	7.67835		OK		5	2	1	3	7	6	4	8	9		0	0	0	0	0	0	0	0	0		5	2	1	3	7	6	4	8	9		4
GB14619	GB42579	FBgn0262738	no receptor potential A	Immune system process (GO:0002376)	Immune syst		2.55289	1.59911	1.85845	1.83852	4.28142	4.74931	1.71493	3.57985	17.8868		OK		5	1	4	3	7	8	2	6	9		0	0	0	0	0	0	0	0	0		5	1	4	3	7	8	2	6	9		4
GB14763	GB53451	FBgn0005630	longitudinals lacking	Immune system process (GO:0002376)	Immune syst		0.786427	2.3919	1.77178	1.22601	4.54455	0	1.8001	2.68404	0.747682		OK		3	7	5	4	9	1	6	8	2		0	0	0	0	0	0	0	0	0		3	7	5	4	9	1	6	8	2		4
GB14801	GB49927	FBgn0050420	Activating transcription factor-2	Immune system process (GO:0002376)	Immune syst		1.51532	1.27349	0.581924	0.959698	0.820937	0.623446	1.95104	2.32728	2.161		OK		6	5	1	4	3	2	7	9	8		0	0	0	0	0	0	0	0	0		6	5	1	4	3	2	7	9	8		4
GB14813	GB42608	FBgn0264294	Cytochrome b5	Immune system process (GO:0002376)	Immune syst		140.804	111.458	96.8437	112.971	137.841	54.3283	42.6195	108.821	136.642		OK		9	5	3	6	8	2	1	4	7		0	0	0	0	0	0	0	0	0		9	5	3	6	8	2	1	4	7		4
GB14837	GB53251	FBgn0243511		Immune system process (GO:0002376)	Immune syst		2.18643	1.1765	1.53767	0.677606	0.639352	4.33522	2.92441	3.50633	4.65832		OK		5	3	4	2	1	8	6	7	9		0	0	0	0	0	0	0	0	0		5	3	4	2	1	8	6	7	9		4
GB14882	GB53826	FBgn0011766	E2F transcription factor	Immune system process (GO:0002376)	Immune syst		2.20777	1.55158	1.35654	1.13328	0.746815	0.708945	4.93023	3.30805	2.76453		OK		6	5	4	3	2	1	9	8	7		0	0	0	0	0	0	0	0	0		6	5	4	3	2	1	9	8	7		4
GB14945	GB53149	FBgn0263289	scribbled	Immune system process (GO:0002376)	Immune syst		12.0773	6.49765	4.51943	8.10455	5.03758	21.2207	15.4331	17.5724	29.7848		OK		5	3	1	4	2	8	6	7	9		0	0	0	0	0	0	0	0	0		5	3	1	4	2	8	6	7	9		4
GB15003	GB53487	FBgn0005630	longitudinals lacking	Immune system process (GO:0002376)	Immune syst		5.00774	4.16231	5.56221	3.75331	8.01372	7.60735	3.41672	13.41	6.59219		OK		4	3	5	2	8	7	1	9	6		0	0	0	0	0	0	0	0	0		4	3	5	2	8	7	1	9	6		4
GB15155	GB48639	FBgn0004197	Serrate	Immune system process (GO:0002376)	Immune syst		7.32163	6.73394	5.62339	7.98735	13.7979	13.1251	7.50036	18.3731	39.4348		OK		3	2	1	5	7	6	4	8	9		0	0	0	0	0	0	0	0	0		3	2	1	5	7	6	4	8	9		4
GB15156	GB53491	FBgn0005630	longitudinals lacking	Immune system process (GO:0002376)	Immune syst		5.56416	4.5734	4.99679	5.75508	11.1302	10.5658	3.42896	14.6809	25.9415		OK		4	2	3	5	7	6	1	8	9		0	0	0	0	0	0	0	0	0		4	2	3	5	7	6	1	8	9		4
GB15281	GB55293	FBgn0260934	par-1	Immune system process (GO:0002376)	Immune syst		10.6675	13.3934	7.38779	12.1204	29.3858	19.341	27.3146	26.4728	44.8653		OK		2	4	1	3	8	5	7	6	9		0	0	0	0	0	0	0	0	0		2	4	1	3	8	5	7	6	9		4
GB15447	GB45431	FBgn0014380	rho-like	Immune system process (GO:0002376)	Immune syst		10.7384	11.575	12.5624	10.0518	4.2273	13.5822	25.7069	22.3739	10.8335		OK		3	5	6	2	1	7	9	8	4		0	0	0	0	0	0	0	0	0		3	5	6	2	1	7	9	8	4		4
GB15719	GB50640	FBgn0086899	Tousled-like kinase	Immune system process (GO:0002376)	Immune syst		4.84999	5.01064	6.47691	5.67769	31.0881	10.3673	9.25803	10.9578	9.08597		OK		1	2	4	3	9	7	6	8	5		0	0	0	0	0	0	0	0	0		1	2	4	3	9	7	6	8	5		4
GB15805	GB40436	FBgn0023167	Small ribonucleoprotein particle protein SmD3	Immune system process (GO:0002376)	Immune syst		84.8457	55.0479	83.4651	53.944	85.0598	21.1563	44.5061	71.516	56.8326		OK		8	4	7	3	9	1	2	6	5		0	0	0	0	0	0	0	0	0		8	4	7	3	9	1	2	6	5		4
GB16114	GB54297	FBgn0021875	Zinc finger protein RP-8	Immune system process (GO:0002376)	Immune syst		4.10825	2.73174	3.39807	2.95598	2.3284	11.9618	12.9752	5.17708	5.4081		OK		5	2	4	3	1	8	9	6	7		0	0	0	0	0	0	0	0	0		5	2	4	3	1	8	9	6	7		4
GB16187	GB49505	FBgn0036980	RhoBTB	Immune system process (GO:0002376)	Immune syst		2.24561	1.23818	1.58421	0.875204	3.67675	3.28499	3.45053	3.40629	4.86299		OK		4	2	3	1	8	5	7	6	9		0	0	0	0	0	0	0	0	0		4	2	3	1	8	5	7	6	9		4
GB16396	GB41740	FBgn0021760	chromosome bows	Immune system process (GO:0002376)	Immune syst		7.40566	10.0726	6.0465	10.1969	5.29848	13.0443	9.77293	8.59699	10.7289		OK		3	6	2	7	1	9	5	4	8		0	0	0	0	0	0	0	0	0		3	6	2	7	1	9	5	4	8		4
GB16409	GB43185	FBgn0031537	sec5	Immune system process (GO:0002376)	Immune syst		2.47811	2.01583	2.28398	1.99077	1.622	1.66459	2.04029	2.69264	1.80307		OK		8	5	7	4	1	2	6	9	3		0	0	0	0	0	0	0	0	0		8	5	7	4	1	2	6	9	3		4
GB16431	GB52721	FBgn0002576	lozenge	Immune system process (GO:0002376)	Immune syst		14.9636	6.4862	7.05403	7.95136	19.7178	9.35895	9.39668	26.4205	25.3439		OK		6	1	2	3	7	4	5	9	8		0	0	0	0	0	0	0	0	0		6	1	2	3	7	4	5	9	8		4
GB16457	GB45131	FBgn0003963	u-shaped	Immune system process (GO:0002376)	Immune syst		0.593861	0.712981	0.587884	0.720073	1.60149	1.3031	1.00061	1.21609	1.78791		OK		2	3	1	4	8	7	5	6	9		0	0	0	0	0	0	0	0	0		2	3	1	4	8	7	5	6	9		4
GB16508	GB49120	FBgn0003079	pole hole	Immune system process (GO:0002376)	Immune syst		0.511342	0.368346	0.261825	0.332152	0.295491	0.561014	0.121921	0.261778	0.9723		OK		7	6	3	5	4	8	1	2	9		0	0	0	0	0	0	0	0	0		7	6	3	5	4	8	1	2	9		4
GB16550	GB46540	FBgn0264294	Cytochrome b5	Immune system process (GO:0002376)	Immune syst		5.59885	5.43472	6.25818	6.26774	3.61404	10.1943	7.19171	6.09849	8.32429		OK		3	2	5	6	1	9	7	4	8		0	0	0	0	0	0	0	0	0		3	2	5	6	1	9	7	4	8		4
gb16573	GB49979	FBgn0043550	Tetraspanin 68C	Immune system process (GO:0002376)	Immune syst		3.52698	2.66898	1.97011	3.41569	4.0763	6.33205	4.587	8.09789	9.7548		OK		4	2	1	3	5	7	6	8	9		0	0	0	0	0	0	0	0	0		4	2	1	3	5	7	6	8	9		4
GB16611	GB55798	FBgn0027491	Cdk5 activator-like protein	Immune system process (GO:0002376)	Immune syst		10.7682	7.04433	7.91891	10.3764	6.02669	15.6283	11.6933	20.4882	46.9162		OK		5	2	3	4	1	7	6	8	9		0	0	0	0	0	0	0	0	0		5	2	3	4	1	7	6	8	9		4
GB16613	GB40656	FBgn0011823	Pendulin	Immune system process (GO:0002376)	Immune syst		5.7359	5.57801	5.90334	3.46505	3.85325	3.77585	5.57993	5.28562	4.08998		OK		8	6	9	1	3	2	7	5	4		0	0	0	0	0	0	0	0	0		8	6	9	1	3	2	7	5	4		4
GB16680	GB51745	FBgn0037116	CG7158	Immune system process (GO:0002376)	Immune syst		0.54783	0.676508	0.471254	0.463626	0.922595	2.88502	1.26292	1.92314	1.16073		OK		3	4	2	1	5	9	7	8	6		0	0	0	0	0	0	0	0	0		3	4	2	1	5	9	7	8	6		4
GB16711	GB41850	FBgn0029167	Hemolectin	Immune system process (GO:0002376)	Immune syst		2.06376	1.841	1.45954	1.71866	1.06008	4.79941	3.57319	4.18999	5.31609		OK		5	4	2	3	1	8	6	7	9		0	0	0	0	0	0	0	0	0		5	4	2	3	1	8	6	7	9		4
GB16736	GB48230	FBgn0050420	Activating transcription factor-2	Immune system process (GO:0002376)	Immune syst		1.52371	1.26627	1.14207	1.08663	0.880514	1.63616	1.63255	2.43421	4.13018		OK		5	4	3	2	1	7	6	8	9		0	0	0	0	0	0	0	0	0		5	4	3	2	1	7	6	8	9		4
GB16739	GB55914	FBgn0261524	licorne	Immune system process (GO:0002376)	Immune syst		2.01769	1.93792	1.91276	1.43794	1.09934	4.17438	7.09255	2.1249	2.95963		OK		5	4	3	2	1	8	9	6	7		0	0	0	0	0	0	0	0	0		5	4	3	2	1	8	9	6	7		4
GB16821	GB52515	FBgn0002526	Laminin A	Immune system process (GO:0002376)	Immune syst		5.45807	5.74157	3.35367	4.05187	3.60466	20.5312	22.6069	12.2413	17.7914		OK		4	5	1	3	2	8	9	6	7		0	0	0	0	0	0	0	0	0		4	5	1	3	2	8	9	6	7		4
GB16921	GB40741	FBgn0052133	ptip	Immune system process (GO:0002376)	Immune syst		1.28559	0.903036	0.990345	0.673046	1.39711	3.78932	0.801544	2.63258	3.66675		OK		5	3	4	1	6	9	2	7	8		0	0	0	0	0	0	0	0	0		5	3	4	1	6	9	2	7	8		4
GB17030	GB50930	FBgn0003507		Immune system process (GO:0002376)	Immune syst		5.48702	3.13697	5.57322	4.30613	11.1949	0.737146	2.66998	3.82182	5.96193		OK		6	3	7	5	9	1	2	4	8		0	0	0	0	0	0	0	0	0		6	3	7	5	9	1	2	4	8		4
GB17138	GB51962	FBgn0086902	kismet	Immune system process (GO:0002376)	Immune syst		4.27825	2.70664	3.12346	2.21789	3.61971	2.47044	4.78314	4.41537	6.59748		OK		6	3	4	1	5	2	8	7	9		0	0	0	0	0	0	0	0	0		6	3	4	1	5	2	8	7	9		4
GB17192	GB52973	FBgn0260866	defense repressor 1	Immune system process (GO:0002376)	Immune syst		3.31299	1.99171	1.88485	2.35287	1.95704	3.23095	2.62607	4.7741	4.96964		OK		7	3	1	4	2	6	5	8	9		0	0	0	0	0	0	0	0	0		7	3	1	4	2	6	5	8	9		4
GB17303	GB49949	FBgn0035850	Autophagy-specific gene 18	Immune system process (GO:0002376)	Immune syst		5.46603	4.69214	4.03027	6.33774	2.72436	8.09595	8.32798	6.29616	8.18486		OK		4	3	2	6	1	7	9	5	8		0	0	0	0	0	0	0	0	0		4	3	2	6	1	7	9	5	8		4
GB17556	GB54853	FBgn0032006	PDGF- and VEGF-receptor related	Immune system process (GO:0002376)	Immune syst		1.11707	0.643743	0.823646	1.3061	2.90485	3.30906	2.14142	3.20249	7.16871		OK		3	1	2	4	6	8	5	7	9		0	0	0	0	0	0	0	0	0		3	1	2	4	6	8	5	7	9		4
GB17628	GB46302	FBgn0262738	no receptor potential A	Immune system process (GO:0002376)	Immune syst		1.32009	1.15765	0.899281	0.514491	0.995012	6.04515	1.80641	2.99706	5.23846		OK		5	4	2	1	3	9	6	7	8		0	0	0	0	0	0	0	0	0		5	4	2	1	3	9	6	7	8		4
GB17687	GB55584	FBgn0016794	daughter of sevenless	Immune system process (GO:0002376)	Immune syst		2.35579	1.39241	1.19299	1.33182	1.43615	2.89706	3.6887	8.85306	44.9669		OK		5	3	1	2	4	6	7	8	9		0	0	0	0	0	0	0	0	0		5	3	1	2	4	6	7	8	9		4
GB17764	GB40429	FBgn0015790	Rab-protein 11	Immune system process (GO:0002376)	Immune syst		43.2051	33.2509	57.632	32.5981	60.6572	26.7396	53.7793	24.5761	17.6418		OK		6	5	8	4	9	3	7	2	1		0	0	0	0	0	0	0	0	0		6	5	8	4	9	3	7	2	1		4
GB17971	GB51743	FBgn0000490	decapentaplegic	Immune system process (GO:0002376)	Immune syst		1.70515	0.503919	0.48356	0.613445	0.568476	0.863439	1.27598	1.20868	3.55404		OK		8	2	1	4	3	5	7	6	9		0	0	0	0	0	0	0	0	0		8	2	1	4	3	5	7	6	9		4
GB18039	GB45082	FBgn0015296	SHC-adaptor protein	Immune system process (GO:0002376)	Immune syst		0.706079	0.565138	0.537141	0.445542	1.80697	1.77067	1.50075	1.65244	4.98674		OK		4	3	2	1	8	7	5	6	9		0	0	0	0	0	0	0	0	0		4	3	2	1	8	7	5	6	9		4
GB18366	GB41829	FBgn0034366	Autophagy-specific gene 7	Immune system process (GO:0002376)	Immune syst		1.97455	1.20111	1.23347	1.30826	0.741678	0.866545	3.25793	2.29128	5.35023		OK		6	3	4	5	1	2	8	7	9		0	0	0	0	0	0	0	0	0		6	3	4	5	1	2	8	7	9		4
GB18378	GB43282	FBgn0004435	G protein alpha49B	Immune system process (GO:0002376)	Immune syst		10.6596	10.1966	8.23594	7.11553	9.26489	56.4786	101.565	27.6257	35.7589		OK		5	4	2	1	3	8	9	6	7		0	0	0	0	0	0	0	0	0		5	4	2	1	3	8	9	6	7		4
GB18613	GB52625	FBgn0003118	pointed	Immune system process (GO:0002376)	Immune syst		34.3172	29.9641	36.2385	32.25	61.0811	19.3958	28.7764	63.8851	98.0206		OK		5	3	6	4	7	1	2	8	9		0	0	0	0	0	0	0	0	0		5	3	6	4	7	1	2	8	9		4
GB18619	GB50333	FBgn0261592	Ribosomal protein S6	Immune system process (GO:0002376)	Immune syst		707.684	721.679	742.221	741.487	2065.78	585.952	595.099	678.191	398.472		OK		5	6	8	7	9	2	3	4	1		0	0	0	0	0	0	0	0	0		5	6	8	7	9	2	3	4	1		4
GB18627	GB48763	FBgn0000022	achaete	Immune system process (GO:0002376)	Immune syst		0.785676	0.335385	0.0536392	0.476327	1.36207	2.87332	0.19982	0.536295	3.98383		OK		6	3	1	4	7	8	2	5	9		0	0	0	0	0	0	0	0	0		6	3	1	4	7	8	2	5	9		4
GB18643	GB47453	FBgn0261797	Dynein heavy chain 64C	Immune system process (GO:0002376)	Immune syst		2.95555	1.25161	1.17215	1.34039	1.90978	5.6599	1.76816	7.26274	25.7492		OK		6	2	1	3	5	7	4	8	9		0	0	0	0	0	0	0	0	0		6	2	1	3	5	7	4	8	9		4
GB18722	GB54764	FBgn0026404	Nedd2-like caspase	Immune system process (GO:0002376)	Immune syst		56.0992	58.768	59.8655	53.976	36.6852	116.182	122.019	82.6091	60.6123		OK		3	4	5	2	1	8	9	7	6		0	0	0	0	0	0	0	0	0		3	4	5	2	1	8	9	7	6		4
GB18769	GB55827	FBgn0015521	Ribosomal protein S21	Immune system process (GO:0002376)	Immune syst		449.829	404.14	530.897	427.473	2919.35	599.972	431.293	1050.41	526.321		OK		4	1	6	2	9	7	3	8	5		0	0	0	0	0	0	0	0	0		4	1	6	2	9	7	3	8	5		4
GB18813	GB51292	FBgn0260642	Antennapedia	Immune system process (GO:0002376)	Immune syst		5.19324	4.53071	5.90325	7.96114	16.8058	20.5118	11.0451	31.5492	41.9678		OK		2	1	3	4	6	7	5	8	9		0	0	0	0	0	0	0	0	0		2	1	3	4	6	7	5	8	9		4
GB18882	GB42706	FBgn0011766		Immune system process (GO:0002376)	Immune syst		1.97926	1.7822	1.7482	1.90094	2.05264	3.37362	2.22477	2.53317	4.08272		OK		4	2	1	3	5	8	6	7	9		0	0	0	0	0	0	0	0	0		4	2	1	3	5	8	6	7	9		4
GB18918	GB49657	FBgn0004606	Zn finger homeodomain 1	Immune system process (GO:0002376)	Immune syst		73.419	63.6063	64.4274	74.9136	30.332	192.407	286.327	219.909	297.902		OK		4	2	3	5	1	6	8	7	9		0	0	0	0	0	0	0	0	0		4	2	3	5	1	6	8	7	9		4
GB18989	GB42321	FBgn0000543	ecdysoneless	Immune system process (GO:0002376)	Immune syst		1.22703	1.10781	0.934887	0.688644	0.255265	12.2776	3.93209	5.22638	6.01956		OK		5	4	3	2	1	9	6	7	8		0	0	0	0	0	0	0	0	0		5	4	3	2	1	9	6	7	8		4
GB19031	GB46056	FBgn0032209	Hand	Immune system process (GO:0002376)	Immune syst		1.99506	1.67666	2.23279	1.99943	7.04087	12.6641	5.3413	4.23133	4.0645		OK		2	1	4	3	8	9	7	6	5		0	0	0	0	0	0	0	0	0		2	1	4	3	8	9	7	6	5		4
GB19155	GB49172	FBgn0000541	Enhancer of bithorax	Immune system process (GO:0002376)	Immune syst		3.16414	2.19065	2.30062	1.66481	2.10275	32.69	4.02869	20.6802	22.236		OK		5	3	4	1	2	9	6	7	8		0	0	0	0	0	0	0	0	0		5	3	4	1	2	9	6	7	8		4
GB19160	GB45689	FBgn0038760	Mediator complex subunit 25	Immune system process (GO:0002376)	Immune syst		3.13654	2.93798	3.51098	2.39646	12.1672	1.431	2.29244	2.28936	1.94864		OK		7	6	8	5	9	1	4	3	2		0	0	0	0	0	0	0	0	0		7	6	8	5	9	1	4	3	2		4
GB19168	GB47837	FBgn0011764	Dorsal switch protein 1	Immune system process (GO:0002376)	Immune syst		11.2088	9.16534	11.4475	6.6118	7.87773	3.9884	6.93416	6.51367	10.3685		OK		8	6	9	3	5	1	4	2	7		0	0	0	0	0	0	0	0	0		8	6	9	3	5	1	4	2	7		4
GB19246	GB44931	FBgn0028436	ECSIT	Immune system process (GO:0002376)	Immune syst		6.21863	4.85922	10.0382	3.77926	1.82725	7.63218	11.8216	6.47508	3.00623		OK		5	4	8	3	1	7	9	6	2		0	0	0	0	0	0	0	0	0		5	4	8	3	1	7	9	6	2		4
GB19301	GB47805	FBgn0043575	PGRP-SC2	Immune system process (GO:0002376)	Immune syst		18.4364	8.85377	7.44146	12.7473	15.3791	8.63257	5.56195	27.0119	40.0432		OK		7	4	2	5	6	3	1	8	9		0	0	0	0	0	0	0	0	0		7	4	2	5	6	3	1	8	9		4
GB19311	GB49159	FBgn0031145	Nuclear transport factor-2	Immune system process (GO:0002376)	Immune syst		8.23154	8.13201	10.1156	8.06624	6.5236	1.5482	2.15333	5.7793	5.3664		OK		8	7	9	6	5	1	2	4	3		0	0	0	0	0	0	0	0	0		8	7	9	6	5	1	2	4	3		4
GB19423	GB45127	FBgn0028541	TM9SF4	Immune system process (GO:0002376)	Immune syst		1.32698	0.902783	0.679458	0.833229	1.34194	0.727939	1.83509	1.20771	3.25913		OK		6	4	1	3	7	2	8	5	9		0	0	0	0	0	0	0	0	0		6	4	1	3	7	2	8	5	9		4
GB19455	GB43567	FBgn0020377	Scavenger receptor class C, type II	Immune system process (GO:0002376)	Immune syst		2.19164	1.87396	2.72612	2.14585	2.27042	4.92637	7.14251	5.14475	6.17476		OK		3	1	5	2	4	6	9	7	8		0	0	0	0	0	0	0	0	0		3	1	5	2	4	6	9	7	8		4
GB19525	GB47743	FBgn0261854	atypical protein kinase C	Immune system process (GO:0002376)	Immune syst		5.08048	4.18522	3.40981	5.17864	9.28188	5.40249	5.41196	12.8845	22.6275		OK		3	2	1	4	7	5	6	8	9		0	0	0	0	0	0	0	0	0		3	2	1	4	7	5	6	8	9		4
GB19541	GB47201	FBgn0004657	myospheroid	Immune system process (GO:0002376)	Immune syst		4.42163	4.01519	2.98852	3.38392	2.9268	5.02756	4.16339	7.49054	8.14007		OK		6	4	2	3	1	7	5	8	9		0	0	0	0	0	0	0	0	0		6	4	2	3	1	7	5	8	9		4
GB19783	GB45615	FBgn0029167	Hemolectin	Immune system process (GO:0002376)	Immune syst		3.21009	1.11337	0.657472	0.973081	1.54586	2.34795	0.510262	0.365196	0		OK		9	6	4	5	7	8	3	2	1		0	0	0	0	0	0	0	0	0		9	6	4	5	7	8	3	2	1		4
GB19857	GB46039	FBgn0003884	alpha-Tubulin at 84B	Immune system process (GO:0002376)	Immune syst		179.008	343.03	152.189	661.915	601.431	444.342	246.584	209.685	184.568		OK		2	6	1	9	8	7	5	4	3		0	0	0	0	0	0	0	0	0		2	6	1	9	8	7	5	4	3		4
GB19881	GB42786	FBgn0027066	Eb1	Immune system process (GO:0002376)	Immune syst		5.98649	3.07785	2.98596	2.79982	5.1281	2.78175	3.62722	8.22071	29.9309		OK		7	4	3	2	6	1	5	8	9		0	0	0	0	0	0	0	0	0		7	4	3	2	6	1	5	8	9		4
GB19884	GB46165	FBgn0010389	heartless	Immune system process (GO:0002376)	Immune syst		2.58484	1.8808	1.49198	0.97689	2.85163	2.32031	3.3617	2.88718	2.45749		OK		6	3	2	1	7	4	9	8	5		0	0	0	0	0	0	0	0	0		6	3	2	1	7	4	9	8	5		4
GB19895	GB50933	FBgn0003117	pannier	Immune system process (GO:0002376)	Immune syst		11.2353	18.2101	11.7523	6.5683	5.21727	5.72312	13.7771	8.35387	10.3003		OK		6	9	7	3	1	2	8	4	5		0	0	0	0	0	0	0	0	0		6	9	7	3	1	2	8	4	5		4
GB19906	GB45031	FBgn0014179	glial cells missing	Immune system process (GO:0002376)	Immune syst		1.38152	0.939894	0.66023	1.376	1.59669	5.81028	1.60309	5.02941	5.91058		OK		4	2	1	3	5	8	6	7	9		0	0	0	0	0	0	0	0	0		4	2	1	3	5	8	6	7	9		4
GB19961	GB42981	FBgn0040323	Gram-negative bacteria binding protein 1	Immune system process (GO:0002376)	Immune syst		2.17691	2.83366	0.985591	3.617	1.48971	13.1989	2.72091	9.15026	9.31349		OK		3	5	1	6	2	9	4	7	8		0	0	0	0	0	0	0	0	0		3	5	1	6	2	9	4	7	8		4
GB19984	GB45510	FBgn0004009	wingless	Immune system process (GO:0002376)	Immune syst		2.15851	1.92965	1.4283	2.79557	6.04483	4.80924	3.24949	5.71217	6.63008		OK		3	2	1	4	8	6	5	7	9		0	0	0	0	0	0	0	0	0		3	2	1	4	8	6	5	7	9		4
GB11057	GB47454	FBgn0015247	Iap2	Imd-Pathway_peptidoglycan recognition protein signaling pathway ; GO:0061057	Imd-Pathway		2.70008	2.89589	2.79272	2.52559	2.41847	1.77742	4.66103	2.67242	1.54023		OK		6	8	7	4	3	2	9	5	1		0	0	0	0	0	0	0	0	0		6	8	7	4	3	2	9	5	1		4
GB15371	GB47804	FBgn0037906	PGRP-LB	Imd-Pathway_peptidoglycan recognition protein signaling pathway ; GO:0061057	Imd-Pathway		0.905818	0.652507	0.222629	0.635462	0.471104	0.596286	1.29586	5.37923	20.6686		OK		6	5	1	4	2	3	7	8	9		0	0	0	0	0	0	0	0	0		6	5	1	4	2	3	7	8	9		4
GB15528	GB44455	FBgn0034647	pirk	Imd-Pathway_peptidoglycan recognition protein signaling pathway ; GO:0061057	Imd-Pathway		4.89318	1.92262	3.82655	2.19602	7.96881	5.85655	1.27276	9.41283	10.1501		OK		5	2	4	3	7	6	1	8	9		0	0	0	0	0	0	0	0	0		5	2	4	3	7	6	1	8	9		4
GB16425	GB45352	FBgn0020381	Dredd	Imd-Pathway_peptidoglycan recognition protein signaling pathway ; GO:0061057	Imd-Pathway		3.0756	2.90993	1.77696	2.79097	0.875391	3.02182	5.30622	3.66607	2.48765		OK		7	5	2	4	1	6	9	8	3		0	0	0	0	0	0	0	0	0		7	5	2	4	1	6	9	8	3		4
GB17188	GB42500	FBgn0035976	PGRP-LC	Imd-Pathway_peptidoglycan recognition protein signaling pathway ; GO:0061057	Imd-Pathway		1.52675	1.4664	1.01026	1.46471	0.678669	13.9159	2.509	7.13469	8.7092		OK		5	4	2	3	1	9	6	7	8		0	0	0	0	0	0	0	0	0		5	4	2	3	1	9	6	7	8		4
GB17514	GB48951	FBgn0034068	casp	Imd-Pathway_peptidoglycan recognition protein signaling pathway ; GO:0061057	Imd-Pathway		5.50916	3.84051	4.17127	2.7151	3.38899	4.21153	10.617	4.00311	6.28529		OK		7	3	5	1	2	6	9	4	8		0	0	0	0	0	0	0	0	0		7	3	5	1	2	6	9	4	8		4
GB18606	GB45648	FBgn0013983	imd	Imd-Pathway_peptidoglycan recognition protein signaling pathway ; GO:0061057	Imd-Pathway		1.4075	1.6335	0.720691	1.18855	2.0334	0	3.22172	1.20093	2.00724		OK		5	6	2	3	8	1	9	4	7		0	0	0	0	0	0	0	0	0		5	6	2	3	8	1	9	4	7		4
GB14664	GB48187	FBgn0026323	Tak1	Imd-Pathway	Imd-Pathway		11.302	12.7588	12.6712	14.7803	20.0578	8.46251	12.23	17.879	11.7637		OK		2	6	5	7	9	1	4	8	3		0	0	0	0	0	0	0	0	0		2	6	5	7	9	1	4	8	3		4
GB17106	GB49918	not found	IKKgamma-kenny	Imd-Pathway	Imd-Pathway		91.6975	81.7744	79.0346	98.3006	180.977	238.275	164.473	279.192	351.462		OK		3	2	1	4	6	7	5	8	9		0	0	0	0	0	0	0	0	0		3	2	1	4	6	7	5	8	9		4
GB18650	GB41606	FBgn0086358	Tab	Imd-Pathway	Imd-Pathway		30.4959	51.5848	14.5877	35.4797	21.0599	22.5636	67.4675	38.9142	39.6803		OK		4	8	1	5	2	3	9	6	7		0	0	0	0	0	0	0	0	0		4	8	1	5	2	3	9	6	7		4
GB19498	GB45752	FBgn0000173	dUbc13	Imd-Pathway	Imd-Pathway		2.50944	2.0128	1.77155	1.78959	3.84132	2.28457	2.42898	2.73338	4.26399		OK		6	3	1	2	8	4	5	7	9		0	0	0	0	0	0	0	0	0		6	3	1	2	8	4	5	7	9		4
GB30399	GB55968	not found		Imd-Pathway	Imd-Pathway		5.69573	7.18011	6.45256	4.43972	1.54285	3.51507	9.98168	6.19626	16.2454		OK		4	7	6	3	1	2	8	5	9		0	0	0	0	0	0	0	0	0		4	7	6	3	1	2	8	5	9		4
GB10469	GB52343	FBgn0037107		IG Superfamily Genes	IG Superfam		6.65932	8.98197	6.63314	6.63046	6.7645	10.9593	11.2089	8.78932	9.49686		OK		3	6	2	1	4	8	9	5	7		0	0	0	0	0	0	0	0	0		3	6	2	1	4	8	9	5	7		4
GB10912	GB53701	not found		IG Superfamily Genes	IG Superfam		10.3855	6.96089	6.78723	9.24885	11.9572	45.7514	10.2679	36.1217	32.1842		OK		5	2	1	3	6	9	4	8	7		0	0	0	0	0	0	0	0	0		5	2	1	3	6	9	4	8	7		4
GB11115	GB47239	FBgn0029082		IG Superfamily Genes	IG Superfam		0.963591	0.642707	0.41116	0.500734	1.90252	1.93819	0.96496	2.13765	3.43544		OK		4	3	1	2	6	7	5	8	9		0	0	0	0	0	0	0	0	0		4	3	1	2	6	7	5	8	9		4
GB11358	GB55483	FBgn0005666		IG Superfamily Genes	IG Superfam		104.791	81.593	99.8374	98.3312	260.581	63.965	60.2156	78.3355	54.4815		OK		8	5	7	6	9	3	2	4	1		0	0	0	0	0	0	0	0	0		8	5	7	6	9	3	2	4	1		4
GB11807	GB53012	FBgn0010473		IG Superfamily Genes	IG Superfam		35.3382	37.3649	44.5642	29.1144	38.2229	23.6672	29.379	51.6935	61.3077		OK		4	5	7	2	6	1	3	8	9		0	0	0	0	0	0	0	0	0		4	5	7	2	6	1	3	8	9		4
GB11846	GB44650	FBgn0002968	Neuroglian	IG Superfamily Genes	IG Superfam		11.1839	13.2775	11.3145	10.7549	2.71395	26.1999	37.0327	25.2928	18.7305		OK		3	5	4	2	1	8	9	7	6		0	0	0	0	0	0	0	0	0		3	5	4	2	1	8	9	7	6		4
GB11918	GB49767	not found		IG Superfamily Genes	IG Superfam		10.1665	4.31856	4.96065	5.11906	8.23647	9.47734	7.59849	11.0217	18.2258		OK		7	1	2	3	5	6	4	8	9		0	0	0	0	0	0	0	0	0		7	1	2	3	5	6	4	8	9		4
GB12490	GB53013	FBgn0028482		IG Superfamily Genes	IG Superfam		9.15779	6.04438	7.62269	5.55594	28.624	7.72114	8.5706	10.716	10.0362		OK		6	2	3	1	9	4	5	8	7		0	0	0	0	0	0	0	0	0		6	2	3	1	9	4	5	8	7		4
GB12933	GB40916	not found		IG Superfamily Genes	IG Superfam		4.39844	4.38779	2.50604	3.78694	5.82291	28.691	12.7221	28.3721	29.5954		OK		4	3	1	2	5	8	6	7	9		0	0	0	0	0	0	0	0	0		4	3	1	2	5	8	6	7	9		4
GB13261	GB44117	FBgn0000547		IG Superfamily Genes	IG Superfam		5.00202	3.65921	2.42054	4.26261	11.5921	132.734	4.53824	43.0417	15.3016		OK		5	2	1	3	6	9	4	8	7		0	0	0	0	0	0	0	0	0		5	2	1	3	6	9	4	8	7		4
GB14317	GB49171	FBgn0021764		IG Superfamily Genes	IG Superfam		4.4996	2.41042	2.25074	2.24273	3.60366	8.3437	5.14245	7.42323	16.232		OK		5	3	2	1	4	8	6	7	9		0	0	0	0	0	0	0	0	0		5	3	2	1	4	8	6	7	9		4
GB14520	GB46360	FBgn0000635		IG Superfamily Genes	IG Superfam		16.5921	11.3294	9.95477	13.321	7.51449	18.9445	21.4901	65.3345	96.6748		OK		5	3	2	4	1	6	7	8	9		0	0	0	0	0	0	0	0	0		5	3	2	4	1	6	7	8	9		4
GB14642	GB47977	FBgn0086906		IG Superfamily Genes	IG Superfam		52.7385	34.3158	50.9701	39.9842	24.539	35.4249	43.5007	64.0995	45.0915		OK		8	2	7	4	1	3	5	9	6		0	0	0	0	0	0	0	0	0		8	2	7	4	1	3	5	9	6		4
GB15344	GB41645	FBgn0000464		IG Superfamily Genes	IG Superfam		25.7958	24.4016	23.1421	25.155	34.1484	37.3333	33.9845	48.9919	55.5732		OK		4	2	1	3	6	7	5	8	9		0	0	0	0	0	0	0	0	0		4	2	1	3	6	7	5	8	9		4
GB15987	GB45774	FBgn0259141		IG Superfamily Genes	IG Superfam		4.75071	4.31215	4.21814	4.09009	8.33982	15.0449	7.4503	14.6539	21.0452		OK		4	3	2	1	6	8	5	7	9		0	0	0	0	0	0	0	0	0		4	3	2	1	6	8	5	7	9		4
GB16060	GB46759	FBgn0037736		IG Superfamily Genes	IG Superfam		41.4433	106.617	33.1072	130.476	31.4732	381.523	717.524	190.597	321.93		OK		3	4	2	5	1	8	9	6	7		0	0	0	0	0	0	0	0	0		3	4	2	5	1	8	9	6	7		4
GB30209	GB44159	not found		IG superfamily genes	IG superfam		42.038	44.5867	70.4433	47.0833	80.1334	42.556	26.4106	88.7175	83.0236		OK		2	4	6	5	7	3	1	9	8		0	0	0	0	0	0	0	0	0		2	4	6	5	7	3	1	9	8		4
GB11717	GB49260	FBgn0061354	CTL1	C-lectin domain	C-lectin do		22.0137	2.59814	45.7597	5.06054	14.0364	2.70177	1.40917	89.8526	6.4916		OK		7	2	8	4	6	3	1	9	5		0	0	0	0	0	0	0	0	0		7	2	8	4	6	3	1	9	5		4
GB11792	GB55225	FBgn0001083	CTL6	C-lectin domain	C-lectin do		1.87	1.29825	1.09905	1.1566	1.97331	7.76059	2.96601	7.07593	8.87002		OK		4	3	1	2	5	8	6	7	9		0	0	0	0	0	0	0	0	0		4	3	1	2	5	8	6	7	9		4
GB11810	GB44210	FBgn0037240	CTL10	C-lectin domain	C-lectin do		1.02886	0.668478	0.656965	0.691901	1.67873	3.7184	1.45457	3.13964	4.66069		OK		4	2	1	3	6	8	5	7	9		0	0	0	0	0	0	0	0	0		4	2	1	3	6	8	5	7	9		4
GB13808	GB43983	FBgn0030617	CTL12	C-lectin domain	C-lectin do		2.84612	3.16522	2.40456	3.28396	4.51209	9.98406	6.09677	11.4647	17.7307		OK		2	3	1	4	5	7	6	8	9		0	0	0	0	0	0	0	0	0		2	3	1	4	5	7	6	8	9		4
GB14265	GB45248	FBgn0032180	CTL2	C-lectin domain	C-lectin do		2.43415	1.94827	2.07559	1.85865	3.818	4.90519	2.9185	6.88347	5.95087		OK		4	2	3	1	6	7	5	9	8		0	0	0	0	0	0	0	0	0		4	2	3	1	6	7	5	9	8		4
GB14382	GB51399	FBgn0013997	CTL8	C-lectin domain	C-lectin do		1.24473	1.17193	0.956018	0.625552	2.1295	4.20474	3.28963	2.91784	3.36336		OK		4	3	2	1	5	9	7	6	8		0	0	0	0	0	0	0	0	0		4	3	2	1	5	9	7	6	8		4
GB14975	GB52656	FBgn0031629	CTL7	C-lectin domain	C-lectin do		33.0042	59.0244	34.5557	65.5503	145.331	140.785	67.3109	53.5273	97.5234		OK		1	4	2	5	9	8	6	3	7		0	0	0	0	0	0	0	0	0		1	4	2	5	9	8	6	3	7		4
GB15050	GB47095	not found	CTL9	C-lectin domain	C-lectin do		3.26129	3.95666	5.69521	2.8097	0.59514	9.03938	4.71471	4.21791	5.38527		OK		3	4	8	2	1	9	6	5	7		0	0	0	0	0	0	0	0	0		3	4	8	2	1	9	6	5	7		4
GB17330	GB40445	FBgn0031918	CTL5	C-lectin domain	C-lectin do		260.317	255.966	251.761	286.415	71.477	207.301	191.269	407.444	190.384		OK		7	6	5	8	1	4	3	9	2		0	0	0	0	0	0	0	0	0		7	6	5	8	1	4	3	9	2		4
GB18049	GB46626	FBgn0035199	CTL3	C-lectin domain	C-lectin do		6.28023	6.68406	5.52752	7.40914	15.3014	54.7499	10.7814	48.6612	84.237		OK		2	3	1	4	6	8	5	7	9		0	0	0	0	0	0	0	0	0		2	3	1	4	6	8	5	7	9		4
GB19013	GB43691	FBgn0038017	CTL11	C-lectin domain	C-lectin do		3.06853	47.9742	2.9329	55.9873	116.048	78.5542	33.4278	4.88728	7.13131		OK		2	6	1	7	9	8	5	3	4		0	0	0	0	0	0	0	0	0		2	6	1	7	9	8	5	3	4		4
GB20122	GB47938	FBgn0031879	CTL4	C-lectin domain	C-lectin do		4.53638	3.52329	3.40184	5.09512	7.00442	3.3707	2.71951	5.88169	6.321		OK		5	4	3	6	9	2	1	7	8		0	0	0	0	0	0	0	0	0		5	4	3	6	9	2	1	7	8		4
GB10036	GB47618	FBgn0010385	Defensin-2	Antimicrobial peptide - AMP	Antimicrobi		0.584586	0.280738	0.179597	0.227837	0.506725	1.92412	0.167262	0.598549	0.833677		OK		6	4	2	3	5	9	1	7	8		0	0	0	0	0	0	0	0	0		6	4	2	3	5	9	1	7	8		4
GB17538	GB51223	not found	Hymenoptaecin	Antimicrobial peptide - AMP	Antimicrobi		2.93066	5.6908	1.95731	120.08	6.18515	22.6472	11.5935	17.743	30.8913		OK		2	3	1	9	4	7	5	6	8		0	0	0	0	0	0	0	0	0		2	3	1	9	4	7	5	6	8		4
GB17782	GB47546	not found	Apidaecin	Antimicrobial peptide - AMP	Antimicrobi		18.3815	71.7478	19.3912	216.032	29.8294	33.7038	26.3686	27.1565	76.8459		OK		1	7	2	9	5	6	3	4	8		0	0	0	0	0	0	0	0	0		1	7	2	9	5	6	3	4	8		4
GB18323	GB47318	not found	abaecin	Antimicrobial peptide - AMP	Antimicrobi		15.4385	20.0456	13.3508	279.012	46.5902	150.562	8.83455	21.0764	68.497		OK		3	4	2	9	6	8	1	5	7		0	0	0	0	0	0	0	0	0		3	4	2	9	6	8	1	5	7		4
GB19392	GB41428	FBgn0010385	Defensin-1	Antimicrobial peptide - AMP	Antimicrobi		16.1687	0.647061	0.910681	4.51614	2.56945	68.2962	2.00468	5.51828	13.4506		OK		8	1	2	5	4	9	3	6	7		0	0	0	0	0	0	0	0	0		8	1	2	5	4	9	3	6	7		4
GB19468	GB53576	not found	apisimin	Antimicrobial peptide - AMP	Antimicrobi		37.1443	10.4807	8.25891	7.77345	16.0359	14.2713	3.88718	33.74	24.7337		OK		9	4	3	2	6	5	1	8	7		0	0	0	0	0	0	0	0	0		9	4	3	2	6	5	1	8	7		4
GB10896	GB53625	FBgn0051997	Vago	Vago orthologue	Vago orthol		27.585	203.099	62.1311	256.561	138.514	536.168	983.357	44.622	34.9163		OK		1	6	4	7	5	8	9	3	2		0	0	0	0	0	0	0	0	0		1	6	4	7	5	8	9	3	2		4
GB12654	GB48208	FBgn0262739	AGO1 argonaute 1	RNAi	RNAi		2.689	2.56298	2.08106	2.70404	3.95	9.59382	6.61312	13.4089	19.2617		OK		3	2	1	4	5	7	6	8	9		0	0	0	0	0	0	0	0	0		3	2	1	4	5	7	6	8	9		4
GB19288	GB48923	FBgn0034246	Dicer-2	RNAi	RNAi		3.8283	2.68111	2.6463	2.24937	0.829603	3.72289	5.36059	4.27608	3.35017		OK		7	4	3	2	1	6	9	8	5		0	0	0	0	0	0	0	0	0		7	4	3	2	1	6	9	8	5		4
GB19389	GB49909	FBgn0250816	argonaute 3	RNAi	RNAi		0.389054	0.546139	0.753931	0.4199	0.622591	3.74312	0.856279	2.57393	2.4754		OK		1	3	5	2	4	9	6	8	7		0	0	0	0	0	0	0	0	0		1	3	5	2	4	9	6	8	7		4
[truncated: 15 more columns]

## Sheet: diff expr 0 vs 3 mites
Apis mellifera putative immune related genes extended list
The gene list has been adapted from: Ryabov EV, Wood GR, Fannon JM, Moore JD, Bull JC, Chandler D, Mead A, Burroughs N, Evans DJ. (2014) A virulent strain of deformed wing virus (DWV) of honeybees (Apis mellifera) prevails after Varroa destructor-mediated, or in vitro, transmission. PLoS Pathog. 2014 Jun 26;10(6):e1004230. doi: 10.1371/journal.ppat.1004230.
Note that double entries were excluded from the original list for the sake of the statistical analysis
The details of the statistical analysis are reported in columns Q to BH; if you are interested, use the command "format > unhide"
If you want to change the significance level go to the spreadsheet "reference parameters"
To see only the significantly differentially expressed genes, use the "filter" in column BK
Correction for multiple comparisons according to McDonald, J.H. 2014. Handbook of Biological Statistics (3rd ed.). Sparky House Publishing, Baltimore, Maryland
							3	4	5	6	12	13	14	15	16
							no mites				three mites						filtering						group2										group2										group2
Apis mellifera OGS1 (2008 version)	Apis mellifera OGS3.1 BEEBASE	FBgn ortholog	Gene Product	GO term / Pathway			G2	G3	G4	G5	I1	I2	I3	I4	I5				2	3	4	5	1	2	3	4	5		2	3	4	5	1	2	3	4	5		2	3	4	5	1	2	3	4	5		n1
GB10023	GB52350	FBgn0036448	myopic	Toll_pathway_Toll signaling pathway ; GO:0008063 and children	Toll_pathwa		1.73873	0.687643	1.09977	0.478343	27.0297	1.93502	22.2417	1.59314	0.63475		OK		6	3	4	1	9	7	8	5	2		0	0	0	0	0	0	0	0	0		6	3	4	1	9	7	8	5	2		4
GB10539	GB54845	FBgn0026318	TNF-receptor-associated factor 6	Toll_pathway_Toll signaling pathway ; GO:0008063 and children	Toll_pathwa		0.47189	0.453235	0.326193	0.0919574	1.02221	0.164114	1.4744	0.878854	0.549114		OK		5	4	3	1	8	2	9	7	6		0	0	0	0	0	0	0	0	0		5	4	3	1	8	2	9	7	6		4
GB10655	GB44055	FBgn0000250	cactus	Toll_pathway_Toll signaling pathway ; GO:0008063 and children	Toll_pathwa		1.02481	0.917186	0.94453	0.798821	19.7777	1.96997	30.7391	0.820234	5.49282		OK		5	3	4	1	8	6	9	2	7		0	0	0	0	0	0	0	0	0		5	3	4	1	8	6	9	2	7		4
GB11090	GB47167	FBgn0026318	TNF-receptor-associated factor 6	Toll_pathway_Toll signaling pathway ; GO:0008063 and children	Toll_pathwa		0.497892	0.298881	0.0764814	0	0	0.415577	0	0.168597	0		OK		9	7	5	1	1	8	1	6	1		0	0	0	1.5	1.5	0	1.5	0	1.5		9	7	5	2.5	2.5	8	2.5	6	2.5		4
GB11883	GB53302	FBgn0000250	cactus	Toll_pathway_Toll signaling pathway ; GO:0008063 and children	Toll_pathwa		2.94603	3.5241	2.04055	2.42163	6.03361	4.38144	5.08773	4.02663	4.65396		OK		3	4	1	2	9	6	8	5	7		0	0	0	0	0	0	0	0	0		3	4	1	2	9	6	8	5	7		4
GB12279	GB55279	FBgn0028990	Serpin 27A	Toll_pathway_Toll signaling pathway ; GO:0008063 and children	Toll_pathwa		0.587017	0.375874	0.520993	0.372834	2.26062	0.810562	4.23884	1.00124	1.28183		OK		4	2	3	1	8	5	9	6	7		0	0	0	0	0	0	0	0	0		4	2	3	1	8	5	9	6	7		4
GB12344	GB51498	FBgn0033402	Myd88	Toll_pathway_Toll signaling pathway ; GO:0008063 and children	Toll_pathwa		0.526066	1.26317	0.7934	0.782839	0.828775	2.02249	1.1954	1.26315	1.33561		OK		1	7	3	2	4	9	5	6	8		0	0	0	0	0	0	0	0	0		1	7	3	2	4	9	5	6	8		4
GB13429	GB47680	FBgn0022787	Helicase 89B	Toll_pathway_Toll signaling pathway ; GO:0008063 and children	Toll_pathwa		1.18815	0.772825	0.693086	0.867525	1.95477	0.77831	4.5112	1.20191	1.44676		OK		5	2	1	4	8	3	9	6	7		0	0	0	0	0	0	0	0	0		5	2	1	4	8	3	9	6	7		4
GB13503	GB52103	FBgn0003495	spatzle	Toll_pathway_Toll signaling pathway ; GO:0008063 and children	Toll_pathwa		0.389309	0.623198	0.39868	0.303459	0	0.794312	0.648738	0.527313	0.402683		OK		3	7	4	2	1	9	8	6	5		0	0	0	0	0	0	0	0	0		3	7	4	2	1	9	8	6	5		4
GB13520	GB44185	FBgn0000250	cactus	Toll_pathway_Toll signaling pathway ; GO:0008063 and children	Toll_pathwa		3.9498	5.30495	5.93906	5.15636	13.6341	7.3262	16.3744	10.1997	15.6444		OK		1	3	4	2	7	5	9	6	8		0	0	0	0	0	0	0	0	0		1	3	4	2	7	5	9	6	8		4
GB13742	GB40654	FBgn0260632	dorsal	Toll_pathway_Toll signaling pathway ; GO:0008063 and children	Toll_pathwa		10.4043	11.636	11.9406	11.2715	2.44479	15.661	7.40521	18.8935	11.8197		OK		3	5	7	4	1	8	2	9	6		0	0	0	0	0	0	0	0	0		3	5	7	4	1	8	2	9	6		4
GB13922	GB41067	FBgn0010269	Downstream of raf1	Toll_pathway_Toll signaling pathway ; GO:0008063 and children	Toll_pathwa		0.876878	0.421107	0.448992	0.341755	1.26633	1.30117	0	0.890788	1.81401		OK		5	3	4	2	7	8	1	6	9		0	0	0	0	0	0	0	0	0		5	3	4	2	7	8	1	6	9		4
GB13935	GB49466	FBgn0261988	G protein-coupled receptor kinase 2	Toll_pathway_Toll signaling pathway ; GO:0008063 and children	Toll_pathwa		1.98957	1.45668	1.04211	1.49999	16.9567	2.06899	18.4248	1.7892	4.04837		OK		5	2	1	3	8	6	9	4	7		0	0	0	0	0	0	0	0	0		5	2	1	3	8	6	9	4	7		4
GB14810	GB53713	FBgn0022787	Helicase 89B	Toll_pathway_Toll signaling pathway ; GO:0008063 and children	Toll_pathwa		1.16576	1.13134	1.13413	1.13586	5.47141	1.59468	7.77039	2.31915	4.89859		OK		4	1	2	3	8	5	9	6	7		0	0	0	0	0	0	0	0	0		4	1	2	3	8	5	9	6	7		4
GB15273	GB48707	FBgn0024222	immune response deficient 5	Toll_pathway_Toll signaling pathway ; GO:0008063 and children	Toll_pathwa		1.22029	1.30227	1.18718	0.819082	0.88113	2.60294	2.03346	2.57111	1.57776		OK		4	5	3	1	2	9	7	8	6		0	0	0	0	0	0	0	0	0		4	5	3	1	2	9	7	8	6		4
GB15684	GB51427	FBgn0003882	tube	Toll_pathway_Toll signaling pathway ; GO:0008063 and children	Toll_pathwa		5.35351	5.92233	4.64043	4.62006	0.828342	6.11749	131.425	11.0063	142.688		OK		4	5	3	2	1	6	8	7	9		0	0	0	0	0	0	0	0	0		4	5	3	2	1	6	8	7	9		4
GB15688	GB52631	FBgn0003495	spatzle	Toll_pathway_Toll signaling pathway ; GO:0008063 and children	Toll_pathwa		5.46509	4.99668	5.52129	5.20204	4.09794	3.07028	10.508	3.09618	3.26125		OK		7	5	8	6	4	1	9	2	3		0	0	0	0	0	0	0	0	0		7	5	8	6	4	1	9	2	3		4
GB15714	GB43157	FBgn0036448	myopic	Toll_pathway_Toll signaling pathway ; GO:0008063 and children	Toll_pathwa		1.74721	1.41051	1.27717	1.33844	1.43562	1.60083	2.25894	0.907865	2.10325		OK		7	4	2	3	5	6	9	1	8		0	0	0	0	0	0	0	0	0		7	4	2	3	5	6	9	1	8		4
GB16281	GB45171	FBgn0010602	lesswright	Toll_pathway_Toll signaling pathway ; GO:0008063 and children	Toll_pathwa		10.1653	14.1331	11.7931	11.0266	15.3987	22.9027	12.0826	18.3904	11.691		OK		1	6	4	2	7	9	5	8	3		0	0	0	0	0	0	0	0	0		1	6	4	2	7	9	5	8	3		4
GB16397	GB49344	FBgn0010441	pelle	Toll_pathway_Toll signaling pathway ; GO:0008063 and children	Toll_pathwa		1.51613	0.7489	0.638794	1.11426	0.375343	0.482085	0.433106	0.792093	1.20977		OK		9	5	4	7	1	3	2	6	8		0	0	0	0	0	0	0	0	0		9	5	4	7	1	3	2	6	8		4
GB16970	GB44935	FBgn0025574	Pellino	Toll_pathway_Toll signaling pathway ; GO:0008063 and children	Toll_pathwa		13.391	12.4158	13.4062	11.0922	3.71299	7.98793	3.83811	11.3785	14.6267		OK		7	6	8	4	1	3	2	5	9		0	0	0	0	0	0	0	0	0		7	6	8	4	1	3	2	5	9		4
GB17879	GB51741	FBgn0030310	Peptidoglycan recognition protein SA	Toll_pathway_Toll signaling pathway ; GO:0008063 and children	Toll_pathwa		7.87129	10.6585	8.40433	12.3716	2.23617	6.46225	0.645078	2.27213	4.40453		OK		6	8	7	9	2	5	1	3	4		0	0	0	0	0	0	0	0	0		6	8	7	9	2	5	1	3	4		4
GB18520	GB50418	FBgn0262473	Toll	Toll_pathway_Toll signaling pathway ; GO:0008063 and children	Toll_pathwa		0.582618	0.631532	0.43981	0.45414	156.352	4.3535	58.4183	0.83424	2.01452		OK		3	4	1	2	9	7	8	5	6		0	0	0	0	0	0	0	0	0		3	4	1	2	9	7	8	5	6		4
GB19537	GB44031	FBgn0260632	dorsal	Toll_pathway_Toll signaling pathway ; GO:0008063 and children	Toll_pathwa		1.25238	0.817332	0.513008	0.650803	6.67791	0.696882	9.95308	0.630684	2.69045		OK		6	5	1	3	8	4	9	2	7		0	0	0	0	0	0	0	0	0		6	5	1	3	8	4	9	2	7		4
GB10640	GB48399	FBgn0029114	Toll / Tollo	Toll_pathway_Toll signaling pathway ;	Toll_pathwa		0.415187	0.152472	0.225096	0.13326	1.90457	0.10872	1.58721	0.363882	0.151571		OK		7	4	5	2	9	1	8	6	3		0	0	0	0	0	0	0	0	0		7	4	5	2	9	1	8	6	3		4
GB13677	GB46708	FBgn0031114	cactin	Toll_pathway_Toll signaling pathway ;	Toll_pathwa		4.04627	2.14504	2.38933	1.59748	0.455326	2.86559	15.4993	2.84706	9.29456		OK		7	3	4	2	1	6	9	5	8		0	0	0	0	0	0	0	0	0		7	3	4	2	1	6	9	5	8		4
GB14044	GB55007	FBgn0030051	persephone-PSH Serine Protease Immune Response Integrator	Toll_pathway_Toll signaling pathway ;	Toll_pathwa		1.76133	0.912787	0.513866	0.958082	3.07427	0.895476	3.54739	0.695111	1.76941		OK		6	4	1	5	8	3	9	2	7		0	0	0	0	0	0	0	0	0		6	4	1	5	8	3	9	2	7		4
GB14609	GB48662	FBgn0004364	Toll	Toll_pathway_Toll signaling pathway ;	Toll_pathwa		4.95181	0.92801	0.519468	0.658997	0.52325	0.772863	2.11321	1.10422	0.562162		OK		9	6	1	4	2	5	8	7	3		0	0	0	0	0	0	0	0	0		9	6	1	4	2	5	8	7	3		4
GB14720	GB42451	FBgn0086657	Mik2	Toll_pathway_Toll signaling pathway ;	Toll_pathwa		1.25465	1.49817	1.62516	1.18943	4.40728	1.05666	6.95025	1.46975	3.47236		OK		3	5	6	2	8	1	9	4	7		0	0	0	0	0	0	0	0	0		3	5	6	2	8	1	9	4	7		4
GB15177	GB43456	FBgn0034476	Toll	Toll_pathway_Toll signaling pathway ;	Toll_pathwa		2.93773	2.50284	1.67667	2.88394	6.07084	1.76465	11.3679	1.16543	4.08121		OK		6	4	2	5	8	3	9	1	7		0	0	0	0	0	0	0	0	0		6	4	2	5	8	3	9	1	7		4
GB15606	GB43914	FBgn0024846	0	Toll_pathway_Toll signaling pathway ;	Toll_pathwa		3.79442	3.26198	3.25252	2.88465	43.0254	5.50006	22.2474	6.12296	6.68665		OK		4	3	2	1	9	5	8	6	7		0	0	0	0	0	0	0	0	0		4	3	2	1	9	5	8	6	7		4
GB16299	GB48426	FBgn0029114	Toll	Toll_pathway_Toll signaling pathway ;	Toll_pathwa		0.62631	0.245076	0.441843	0.433953	1.40696	0.451771	2.43523	0.361324	1.36763		OK		6	1	4	3	8	5	9	2	7		0	0	0	0	0	0	0	0	0		6	1	4	3	8	5	9	2	7		4
GB16472	GB48820	FBgn0028985	NEC LIKE	Toll_pathway_Toll signaling pathway ;	Toll_pathwa		5.78151	9.27526	11.2818	7.18082	19.2676	11.9139	26.9969	7.18555	6.90015		OK		1	5	6	3	8	7	9	4	2		0	0	0	0	0	0	0	0	0		1	5	6	3	8	7	9	4	2		4
GB17012	GB46970	not found	NEC LIKE	Toll_pathway_Toll signaling pathway ;	Toll_pathwa		1.00963	0.67134	0.572637	0.484298	0	4.06228	0.776503	0.683761	0.240995		OK		8	5	4	3	1	9	7	6	2		0	0	0	0	0	0	0	0	0		8	5	4	3	1	9	7	6	2		4
GB17781	GB48396	FBgn0036494	Toll	Toll_pathway_Toll signaling pathway ;	Toll_pathwa		0.800767	0.204295	0.338267	0.292586	5.4207	0.264566	33.2762	0.101684	2.95074		OK		6	2	5	4	8	3	9	1	7		0	0	0	0	0	0	0	0	0		6	2	5	4	8	3	9	1	7		4
GB17927	GB49441	FBgn0003450	Toll-Pathway_persephone-Serine protease--Extracellular-cSP10	Toll_pathway_Toll signaling pathway ;	Toll_pathwa		3.73419	5.56665	4.15868	4.72994	6.74085	6.32023	3.5002	3.05581	4.10388		OK		3	7	5	6	9	8	2	1	4		0	0	0	0	0	0	0	0	0		3	7	5	6	9	8	2	1	4		4
GB17936	GB55933	FBgn0039532		Toll_pathway_Toll signaling pathway ;	Toll_pathwa		1.19147	0.776534	0.52292	0.464363	0	2.84138	1.7018	0.979821	0.528171		OK		7	5	3	2	1	9	8	6	4		0	0	0	0	0	0	0	0	0		7	5	3	2	1	9	8	6	4		4
GB17961	GB41158	not found	Tollip	Toll_pathway_Toll signaling pathway ;	Toll_pathwa		2.82096	2.81569	3.09278	2.06954	0.958553	3.97047	0	4.64507	3.08951		OK		5	4	7	3	2	8	1	9	6		0	0	0	0	0	0	0	0	0		5	4	7	3	2	8	1	9	6		4
GB17975	GB40699	FBgn0029114	Tollo	Toll_pathway_Toll signaling pathway ;	Toll_pathwa		1.25326	0.773814	0.330023	0.837334	0	0.249061	0	0.66688	0		OK		9	7	5	8	1	4	1	6	1		0	0	0	0	1	0	1	0	1		9	7	5	8	2	4	2	6	2		4
GB18032	GB42472	not found	dorsal	Toll_pathway_Toll signaling pathway ;	Toll_pathwa		1.19454	1.92344	1.64065	1.20498	3.6531	2.4242	8.07933	0.808992	2.39847		OK		2	5	4	3	8	7	9	1	6		0	0	0	0	0	0	0	0	0		2	5	4	3	8	7	9	1	6		4
GB19066	GB44032	not found	dorsal	Toll_pathway_Toll signaling pathway ;	Toll_pathwa		37.8674	35.2481	31.5505	29.4495	5.81231	16.7727	8.65393	19.7836	23.7696		OK		9	8	7	6	1	3	2	4	5		0	0	0	0	0	0	0	0	0		9	8	7	6	1	3	2	4	5		4
GB19582	GB54611	FBgn0028984	NEC-like	Toll_pathway_Toll signaling pathway ;	Toll_pathwa		12.1638	15.2836	8.18458	17.5951	11.4036	9.32059	8.77238	5.18578	6.68272		OK		7	8	3	9	6	5	4	1	2		0	0	0	0	0	0	0	0	0		7	8	3	9	6	5	4	1	2		4
GB11563	GB45417	FBgn0041182	TEPB	TEP - Thioester-containing protein	TEP - Thioe		1.34361	1.74999	1.41348	1.87248	1.41117	1.44999	2.44251	1.46143	1.95831		OK		1	6	3	7	2	4	9	5	8		0	0	0	0	0	0	0	0	0		1	6	3	7	2	4	9	5	8		4
GB12605	GB42455	FBgn0041182	TEP7	TEP - Thioester-containing protein	TEP - Thioe		4.00779	5.99972	5.33372	4.29205	6.91463	4.58854	13.2536	2.2999	6.9611		OK		2	6	5	3	7	4	9	1	8		0	0	0	0	0	0	0	0	0		2	6	5	3	7	4	9	1	8		4
GB18789	GB48204	FBgn0020240	TEPA	TEP - Thioester-containing protein	TEP - Thioe		0.76574	0.525334	0.425693	0.312651	2.36964	0.537691	3.64576	0.814928	2.31956		OK		5	3	2	1	8	4	9	6	7		0	0	0	0	0	0	0	0	0		5	3	2	1	8	4	9	6	7		4
GB10222	GB41097	not found	SP18	serine proteases	serine prot		1.96106	0.573249	0.314337	1.26276	1.47758	0.80656	5.96742	0.461951	1.85204		OK		8	3	1	5	6	4	9	2	7		0	0	0	0	0	0	0	0	0		8	3	1	5	6	4	9	2	7		4
GB10646	GB41409	FBgn0036436	SP4	serine proteases	serine prot		0.555481	0.640225	0.443704	0.432987	2.88788	1.73094	3.61001	1.09096	2.41317		OK		3	4	2	1	8	6	9	5	7		0	0	0	0	0	0	0	0	0		3	4	2	1	8	6	9	5	7		4
GB10758	GB44146	FBgn0034709	0	serine proteases	serine prot		25.1539	66.9238	33.3516	98.3608	19.9237	9.80941	9.7533	23.972	31.5676		OK		5	8	7	9	3	2	1	4	6		0	0	0	0	0	0	0	0	0		5	8	7	9	3	2	1	4	6		4
GB10943	GB49946	FBgn0011653	cSPH41	serine proteases	serine prot		0.828081	1.10465	0.546497	0.525942	5.58069	1.55301	11.1925	1.26702	2.28408		OK		3	4	2	1	8	6	9	5	7		0	0	0	0	0	0	0	0	0		3	4	2	1	8	6	9	5	7		4
GB11297	GB47402	not found	SP31	serine proteases	serine prot		0.993449	0.130115	0.166477	0.140796	1.5651	0.0502548	7.22385	0.305821	2.52224		OK		6	2	4	3	7	1	9	5	8		0	0	0	0	0	0	0	0	0		6	2	4	3	7	1	9	5	8		4
GB11298	GB52598	FBgn0032213	cSPH42	serine proteases	serine prot		149.716	141.12	80.3488	158.973	85.5149	88.2518	230.407	13.3677	136.28		OK		7	6	2	8	3	4	9	1	5		0	0	0	0	0	0	0	0	0		7	6	2	8	3	4	9	1	5		4
GB11511	GB40138	not found	SP32	serine proteases	serine prot		0.117292	0.0563275	0.576552	0.365707	0	0.195801	0.586359	0.873784	0		OK		4	3	7	6	1	5	8	9	1		0	0	0	0	0.5	0	0	0	0.5		4	3	7	6	1.5	5	8	9	1.5		4
GB11552	GB48510	not found	SP34	serine proteases	serine prot		1.22419	1.45014	1.00292	2.481	15.5575	2.86103	24.8876	0.829071	6.33122		OK		3	4	2	5	8	6	9	1	7		0	0	0	0	0	0	0	0	0		3	4	2	5	8	6	9	1	7		4
GB11588	GB50026	not found	SP27	serine proteases	serine prot		14.9368	4.17133	14.6146	4.93559	4.92375	3.162	6.08731	0.714703	6.04561		OK		9	3	8	5	4	2	7	1	6		0	0	0	0	0	0	0	0	0		9	3	8	5	4	2	7	1	6		4
GB11698	GB49552	not found	cSP3	serine proteases	serine prot		8.54966	8.06183	8.35922	7.73449	1.62222	4.0282	5.92759	1.77509	7.93968		OK		9	7	8	5	1	3	4	2	6		0	0	0	0	0	0	0	0	0		9	7	8	5	1	3	4	2	6		4
GB12253	GB50586	FBgn0003319	SP16	serine proteases	serine prot		3.31662	3.1855	0.752444	6.84095	10.3898	3.36454	9.69307	7.03218	10.2125		OK		3	2	1	5	9	4	7	6	8		0	0	0	0	0	0	0	0	0		3	2	1	5	9	4	7	6	8		4
GB12300	GB41399	FBgn0042098	SP5	serine proteases	serine prot		1.48912	1.56433	2.63056	1.16074	1.61287	3.1591	3.25689	5.10549	7.22004		OK		2	3	5	1	4	6	7	8	9		0	0	0	0	0	0	0	0	0		2	3	5	1	4	6	7	8	9		4
GB12379	GB54517	not found	SP48	serine proteases	serine prot		0.237939	0.399933	0.4386	0.278204	0	0.397203	1.18949	0.563998	0		OK		3	6	7	4	1	5	9	8	1		0	0	0	0	0.5	0	0	0	0.5		3	6	7	4	1.5	5	9	8	1.5		4
GB13019	GB54775	FBgn0030027	SPH56	serine proteases	serine prot		4.84624	3.2734	3.6556	2.76407	13.9973	1.66624	25.9998	4.48284	8.80285		OK		6	3	4	2	8	1	9	5	7		0	0	0	0	0	0	0	0	0		6	3	4	2	8	1	9	5	7		4
GB13263	GB52185	not found	SP40	serine proteases	serine prot		6.205	2.32151	1.86197	1.85594	6.25176	1.36504	15.1492	0.732956	3.13445		OK		7	5	4	3	8	2	9	1	6		0	0	0	0	0	0	0	0	0		7	5	4	3	8	2	9	1	6		4
GB13397	GB41410	not found	SPH51	serine proteases	serine prot		0.779724	1.41459	0.958191	1.28309	17.2658	1.92834	27.2857	1.76021	15.5925		OK		1	4	2	3	8	6	9	5	7		0	0	0	0	0	0	0	0	0		1	4	2	3	8	6	9	5	7		4
GB13489	GB44120	FBgn0050375	SP28	serine proteases	serine prot		0.910891	2.0505	0.909496	0.976282	1.47988	6.08237	3.69986	4.31825	2.47323		OK		2	5	1	3	4	9	7	8	6		0	0	0	0	0	0	0	0	0		2	5	1	3	4	9	7	8	6		4
GB13791	GB48079	FBgn0015316	SP22	serine proteases	serine prot		15.3574	0.946545	1.5643	0.384091	17.79	1.18816	29.9706	0.611806	10.9581		OK		7	3	5	1	8	4	9	2	6		0	0	0	0	0	0	0	0	0		7	3	5	1	8	4	9	2	6		4
GB14001	GB53354	FBgn0032402	cSPH50	serine proteases	serine prot		0.954101	0.738197	0.130275	0.991605	0	0.766867	1.32491	0.574361	1.31584		OK		6	4	2	7	1	5	9	3	8		0	0	0	0	0	0	0	0	0		6	4	2	7	1	5	9	3	8		4
GB14077	GB54762	FBgn0033362	cSP6	serine proteases	serine prot		0.663207	0.70404	0.364607	0.843457	7.25882	1.55385	7.15443	1.20562	1.40809		OK		2	3	1	4	9	7	8	5	6		0	0	0	0	0	0	0	0	0		2	3	1	4	9	7	8	5	6		4
GB14233	GB51631	not found	SP24	serine proteases	serine prot		14.1223	80.8783	76.8023	101.329	2204.12	52.5189	2395.99	32.7915	869.912		OK		1	5	4	6	8	3	9	2	7		0	0	0	0	0	0	0	0	0		1	5	4	6	8	3	9	2	7		4
GB14247	GB45700	FBgn0000533	cSP2	serine proteases	serine prot		6.16157	7.0042	3.97762	8.99771	2.02743	4.557	5.06878	0.475391	10.4069		OK		6	7	3	8	2	4	5	1	9		0	0	0	0	0	0	0	0	0		6	7	3	8	2	4	5	1	9		4
GB14309	GB50650	not found	cSP33	serine proteases	serine prot		0.333978	0.224542	0.20521	0.468593	0.578771	0.545135	4.11836	0.55792	1.38181		OK		3	2	1	4	7	5	9	6	8		0	0	0	0	0	0	0	0	0		3	2	1	4	7	5	9	6	8		4
GB14366	GB52597	not found	cSPH39	serine proteases	serine prot		1.33842	1.67946	1.53865	1.48078	2.99282	1.03306	2.80589	2.01755	1.20577		OK		3	6	5	4	9	1	8	7	2		0	0	0	0	0	0	0	0	0		3	6	5	4	9	1	8	7	2		4
GB14603	GB40137	FBgn0026250	SP17	serine proteases	serine prot		49.9272	42.8436	16.8753	57.9152	0.787995	1.97358	49.5549	0.554307	2.53979		OK		8	6	5	9	2	3	7	1	4		0	0	0	0	0	0	0	0	0		8	6	5	9	2	3	7	1	4		4
GB14644	GB41407	not found	SP29	serine proteases	serine prot		2.79005	27.8881	15.2694	20.5847	4.49772	5.95734	2.91932	9.18403	13.8926		OK		1	9	7	8	3	4	2	5	6		0	0	0	0	0	0	0	0	0		1	9	7	8	3	4	2	5	6		4
GB14654	GB41408	FBgn0039272	SP11	serine proteases	serine prot		1.47799	1.13565	0.317849	0.576033	8.32424	1.48037	5.91095	1.40134	1.14657		OK		6	3	1	2	9	7	8	5	4		0	0	0	0	0	0	0	0	0		6	3	1	2	9	7	8	5	4		4
GB14774	GB48081	not found	SP47	serine proteases	serine prot		0.41842	0.502349	0.24424	0.554457	6.70724	0.942959	5.12478	0.609249	0.649192		OK		2	3	1	4	9	7	8	5	6		0	0	0	0	0	0	0	0	0		2	3	1	4	9	7	8	5	6		4
GB15254	GB50290	not found	cSPH55	serine proteases	serine prot		1.57807	1.45739	0.546973	1.3247	12.9725	2.20655	24.2739	2.08266	9.66814		OK		4	3	1	2	8	6	9	5	7		0	0	0	0	0	0	0	0	0		4	3	1	2	8	6	9	5	7		4
GB15317	GB52191	FBgn0051217	SP49	serine proteases	serine prot		1.83451	2.23511	1.46118	1.72126	3.82674	2.24956	8.49165	3.40511	3.90048		OK		3	4	1	2	7	5	9	6	8		0	0	0	0	0	0	0	0	0		3	4	1	2	7	5	9	6	8		4
GB15453	GB47933	not found	SP44	serine proteases	serine prot		1.04312	0.972415	0.904851	0.669605	10.1018	1.02431	23.9263	0.249333	3.80807		OK		6	4	3	2	8	5	9	1	7		0	0	0	0	0	0	0	0	0		6	4	3	2	8	5	9	1	7		4
GB15640	GB50164	not found	SP13	serine proteases	serine prot		1.36345	1.80063	1.46608	2.28499	1.77211	1.47945	3.74885	1.38508	3.80779		OK		1	6	3	7	5	4	8	2	9		0	0	0	0	0	0	0	0	0		1	6	3	7	5	4	8	2	9		4
GB15702	GB48471	not found	SPH53	serine proteases	serine prot		1.07464	1.10097	1.05649	0.837662	0.62077	3.30883	1.43261	2.03781	1.55618		OK		4	5	3	2	1	9	6	8	7		0	0	0	0	0	0	0	0	0		4	5	3	2	1	9	6	8	7		4
GB15980	GB42804	not found	SPH54	serine proteases	serine prot		3.36155	1.15309	1.06362	1.27096	3.29011	0.969442	4.68973	1.06644	1.73274		OK		8	4	2	5	7	1	9	3	6		0	0	0	0	0	0	0	0	0		8	4	2	5	7	1	9	3	6		4
GB16021	GB45565	FBgn0038481	SP35	serine proteases	serine prot		50.7533	98.9689	49.9229	96.8511	105.19	150.527	204.368	150.02	84.6456		OK		2	5	1	4	6	8	9	7	3		0	0	0	0	0	0	0	0	0		2	5	1	4	6	8	9	7	3		4
GB16038	GB48080	not found	SPH57	serine proteases	serine prot		1.23632	1.42493	1.11415	2.12011	4.28499	3.25629	3.70833	2.17695	2.81334		OK		2	3	1	4	9	7	8	5	6		0	0	0	0	0	0	0	0	0		2	3	1	4	9	7	8	5	6		4
GB16147	GB45701	FBgn0027930	cSP1	serine proteases	serine prot		1.17466	0.737682	0.416399	0.950839	0.782937	0.854754	0.677571	0.85672	0.560774		OK		9	4	1	8	5	6	3	7	2		0	0	0	0	0	0	0	0	0		9	4	1	8	5	6	3	7	2		4
GB16214	GB56027	FBgn0036287	SP38	serine proteases	serine prot		14.1469	13.0909	10.312	14.2782	5.49298	2.91487	3.66956	5.42313	10.457		OK		8	7	5	9	4	1	2	3	6		0	0	0	0	0	0	0	0	0		8	7	5	9	4	1	2	3	6		4
GB16220	GB44149	FBgn0038727	cSP21	serine proteases	serine prot		1.58833	2.33916	1.5615	1.44442	41.7464	4.68426	57.6994	2.6892	14.1289		OK		3	4	2	1	8	6	9	5	7		0	0	0	0	0	0	0	0	0		3	4	2	1	8	6	9	5	7		4
GB16367	GB40831	FBgn0038211	SP46	serine proteases	serine prot		6.37933	5.05732	4.38636	4.89364	1.75478	2.33834	4.04967	3.73744	4.24188		OK		9	8	6	7	1	2	4	3	5		0	0	0	0	0	0	0	0	0		9	8	6	7	1	2	4	3	5		4
GB17145	GB46726	FBgn0051728	cSP7	serine proteases	serine prot		0.932546	0.518552	0.392049	0.879934	0.425281	1.09245	2.20828	0.465359	1.97993		OK		6	4	1	5	2	7	9	3	8		0	0	0	0	0	0	0	0	0		6	4	1	5	2	7	9	3	8		4
GB17345	GB41710	FBgn0036612	SPH19	serine proteases	serine prot		0.921017	0.823176	0.330115	1.17658	7.3154	0.711803	6.52275	0.415834	3.09614		OK		5	4	1	6	9	3	8	2	7		0	0	0	0	0	0	0	0	0		5	4	1	6	9	3	8	2	7		4
GB17654	GB43369	not found	SP45	serine proteases	serine prot		11.7968	6.93929	12.1388	6.34702	18.2169	10.4453	21.5209	9.52611	11.8051		OK		5	2	7	1	8	4	9	3	6		0	0	0	0	0	0	0	0	0		5	2	7	1	8	4	9	3	6		4
GB18178	GB41178	FBgn0038447	SP15	serine proteases	serine prot		0.528991	0.869082	0.273713	1.1068	0.241243	0.63519	0.417553	0.471388	1.03673		OK		5	7	2	9	1	6	3	4	8		0	0	0	0	0	0	0	0	0		5	7	2	9	1	6	3	4	8		4
GB18450	GB52706	FBgn0033365	cSP26	serine proteases	serine prot		4.41184	1.52399	1.28407	2.2323	2.01199	1.76585	3.0955	2.93546	3.12233		OK		9	2	1	5	4	3	7	6	8		0	0	0	0	0	0	0	0	0		9	2	1	5	4	3	7	6	8		4
GB18530	GB50314	not found	SP43	serine proteases	serine prot		0.124135	0.178842	0.0762739	0.193522	18.2853	0.690748	21.72	0.168139	7.70399		OK		2	4	1	5	8	6	9	3	7		0	0	0	0	0	0	0	0	0		2	4	1	5	8	6	9	3	7		4
GB18944	GB46203	FBgn0037627	SPH37	serine proteases	serine prot		2.12031	4.22384	3.3294	3.06064	0.680449	3.01516	1.17775	2.18054	3.41158		OK		3	9	7	6	1	5	2	4	8		0	0	0	0	0	0	0	0	0		3	9	7	6	1	5	2	4	8		4
GB19292	GB45336	not found	SPH52	serine proteases	serine prot		22.6711	33.7767	24.405	24.5595	15.4678	16.5886	21.4178	6.2866	26.8659		OK		5	9	6	7	2	3	4	1	8		0	0	0	0	0	0	0	0	0		5	9	6	7	2	3	4	1	8		4
GB19590	GB40567	FBgn0002926	SP20	serine proteases	serine prot		1.59653	1.71382	3.45266	3.03797	1.62749	1.35871	3.28642	2.95751	4.80843		OK		2	4	8	6	3	1	7	5	9		0	0	0	0	0	0	0	0	0		2	4	8	6	3	1	7	5	9		4
GB19719	GB50648	FBgn0085379	cSP25	serine proteases	serine prot		0.914419	0.724573	0.941112	0.890966	10.1022	1.03037	11.9997	1.22308	5.81687		OK		3	1	4	2	8	5	9	6	7		0	0	0	0	0	0	0	0	0		3	1	4	2	8	5	9	6	7		4
GB19846	GB50761	FBgn0038485	SP36	serine proteases	serine prot		46.4628	4.35902	4.03105	2.52187	2.33612	0.550088	17.0724	1.27814	3.06759		OK		9	7	6	4	3	1	8	2	5		0	0	0	0	0	0	0	0	0		9	7	6	4	3	1	8	2	5		4
GB19856	GB40926	FBgn0051265	SP12	serine proteases	serine prot		4.80626	7.57229	7.14978	9.2674	0.730621	3.23748	2.95071	6.11027	9.1578		OK		4	7	6	9	1	3	2	5	8		0	0	0	0	0	0	0	0	0		4	7	6	9	1	3	2	5	8		4
GB10506	GB52097	FBgn0058006	AmSCR-B1	Scav. Receptor A	Scav. Recep		9.72428	7.33846	6.4018	7.30919	11.6071	8.08898	13.3934	5.98088	10.4689		OK		6	4	2	3	8	5	9	1	7		0	0	0	0	0	0	0	0	0		6	4	2	3	8	5	9	1	7		4
GB11743	GB45986	FBgn0035290	AmSCR-B2	Scav. Receptor A	Scav. Recep		8.82424	12.5205	9.6117	7.9584	21.1688	6.26968	22.4214	4.49445	15.162		OK		4	6	5	3	8	2	9	1	7		0	0	0	0	0	0	0	0	0		4	6	5	3	8	2	9	1	7		4
GB12378	GB50865	not found	AmSCR-B3	Scav. Receptor A	Scav. Recep		3.85211	12.9494	8.87587	17.2652	5.00667	16.0763	1.92573	21.914	23.309		OK		2	5	4	7	3	6	1	8	9		0	0	0	0	0	0	0	0	0		2	5	4	7	3	6	1	8	9		4
GB12538	GB50482	FBgn0023479	GRAAL/Tequila-like	Scav. Receptor A	Scav. Recep		5.42101	3.84439	4.39549	3.32369	41.5776	1.96416	24.1056	1.35239	4.37402		OK		7	4	6	3	9	2	8	1	5		0	0	0	0	0	0	0	0	0		7	4	6	3	9	2	8	1	5		4
GB12830	GB50454	not found	AmSCR-B4	Scav. Receptor A	Scav. Recep		7.53311	11.2814	46.8956	8.11252	11.1651	39.2704	17.0953	24.2332	70.5885		OK		1	4	8	2	3	7	5	6	9		0	0	0	0	0	0	0	0	0		1	4	8	2	3	7	5	6	9		4
GB13360	GB49476	FBgn0034660	lox2-like	Scav. Receptor A	Scav. Recep		3.82234	2.98475	3.03601	3.65769	42.275	3.95991	128.477	2.6097	8.38947		OK		5	2	3	4	8	6	9	1	7		0	0	0	0	0	0	0	0	0		5	2	3	4	8	6	9	1	7		4
GB13813	GB49363	FBgn0027562	AmSCR-B5	Scav. Receptor A	Scav. Recep		1.54876	3.21414	1.22352	2.32823	6.2306	2.83165	14.1024	2.7346	5.49247		OK		2	6	1	3	8	5	9	4	7		0	0	0	0	0	0	0	0	0		2	6	1	3	8	5	9	4	7		4
GB14314	GB53014	not found	AmSCR-B6	Scav. Receptor A	Scav. Recep		3.90561	0.976344	2.10391	2.29369	11.1259	1.13129	10.431	1.41311	2.6563		OK		7	1	4	5	9	2	8	3	6		0	0	0	0	0	0	0	0	0		7	1	4	5	9	2	8	3	6		4
GB15549	GB48343	not found	AmSCR-B7	Scav. Receptor A	Scav. Recep		1.49255	0.796413	0.271729	1.12032	3.35291	0.799765	4.69796	0.898503	3.08765		OK		6	2	1	5	8	3	9	4	7		0	0	0	0	0	0	0	0	0		6	2	1	5	8	3	9	4	7		4
GB16388	GB40306	not found	AmSCR-B8	Scav. Receptor A	Scav. Recep		59.2095	76.2689	121.675	84.742	101.235	54.5444	144.534	79.1254	189.876		OK		2	3	7	5	6	1	8	4	9		0	0	0	0	0	0	0	0	0		2	3	7	5	6	1	8	4	9		4
GB19649	GB54246	FBgn0033192	Corin-like	Scav. Receptor A	Scav. Recep		62.8462	12.5019	4.69403	20.5619	62.7352	18.2481	148.373	38.4338	37.0868		OK		8	2	1	4	7	3	9	6	5		0	0	0	0	0	0	0	0	0		8	2	1	4	7	3	9	6	5		4
GB19683	GB50866	FBgn0010435	AmSCR-B10	Scav. Receptor A	Scav. Recep		9.85858	7.61295	7.94748	11.0658	21.1849	6.14409	13.7997	7.47784	13.9499		OK		5	3	4	6	9	1	7	2	8		0	0	0	0	0	0	0	0	0		5	3	4	6	9	1	7	2	8		4
GB19916	GB44045	FBgn0015924	AmSCR-B9	Scav. Receptor A	Scav. Recep		0.996672	1.4029	1.22479	1.60735	7.7426	3.05984	7.21605	2.90943	8.1051		OK		1	3	2	4	8	6	7	5	9		0	0	0	0	0	0	0	0	0		1	3	2	4	8	6	7	5	9		4
GB19925	GB54506	FBgn0014033	AmSCR-C	Scav. Receptor A	Scav. Recep		6.57734	5.56526	4.59949	5.8105	2.1711	3.1371	5.48018	2.12117	3.01289		OK		9	7	5	8	2	4	6	1	3		0	0	0	0	0	0	0	0	0		9	7	5	8	2	4	6	1	3		4
GB18313	GB43738	FBgn0033367	PPO	PPO - melanization	PPO - melan		3.1739	2.36253	1.75516	1.08237	1.0313	1.78819	1.98335	2.49879	5.17062		OK		8	6	3	2	1	4	5	7	9		0	0	0	0	0	0	0	0	0		8	6	3	2	1	4	5	7	9		4
GB18767	GB50013	FBgn0036891	PPOAct	PPO - melanization	PPO - melan		11.7536	11.228	12.2187	9.82204	3.85352	4.70193	3.28198	2.78243	10.5802		OK		8	7	9	5	3	4	2	1	6		0	0	0	0	0	0	0	0	0		8	7	9	5	3	4	2	1	6		4
GB10231	GB40163	FBgn0034539	CG11159	Lysozyme	Lysozyme		277.364	13.0042	19.0153	23.6705	0	1.39917	99.5943	0.130992	4.20136		OK		9	5	6	7	1	3	8	2	4		0	0	0	0	0	0	0	0	0		9	5	6	7	1	3	8	2	4		4
GB19988	GB47104	FBgn0025827		Lysozyme	Lysozyme		147.818	66.4788	116.478	64.1505	36.3476	88.5891	27.9609	112.149	124.59		OK		9	4	7	3	2	5	1	6	8		0	0	0	0	0	0	0	0	0		9	4	7	3	2	5	1	6	8		4
GB10567	GB49149	FBgn0004647	Notch	JNK cascade ; GO:0007254	JNK cascade		275.257	294.118	282.109	141.317	44.4286	328.028	106.826	152.219	59.1206		OK		6	8	7	4	1	9	3	5	2		0	0	0	0	0	0	0	0	0		6	8	7	4	1	9	3	5	2		4
GB11373	GB45558	FBgn0010333	Rac1	JNK cascade ; GO:0007254	JNK cascade		3.64035	5.24465	4.65015	4.85376	1.66015	4.90424	9.09931	6.68251	7.72899		OK		2	6	3	4	1	5	9	7	8		0	0	0	0	0	0	0	0	0		2	6	3	4	1	5	9	7	8		4
GB11819	GB47961	FBgn0024329	Mekk1	JNK cascade ; GO:0007254	JNK cascade		0.352593	0.288852	0.293112	0.355675	4.13345	1.13104	2.2811	0.266884	1.35156		OK		4	2	3	5	9	6	8	1	7		0	0	0	0	0	0	0	0	0		4	2	3	5	9	6	8	1	7		4
gb12004	GB53318	FBgn0001291	Jun-related antigen	JNK cascade ; GO:0007254	JNK cascade		8.67555	3.84165	4.22296	4.21554	1.95252	1.44198	6.19576	2.51805	12.5863		OK		8	4	6	5	2	1	7	3	9		0	0	0	0	0	0	0	0	0		8	4	6	5	2	1	7	3	9		4
GB12212	GB42049	FBgn0001297	kayak	JNK cascade ; GO:0007254	JNK cascade		21.8366	21.6965	17.0415	16.9234	27.1853	15.7822	34.5059	8.75419	22.9762		OK		6	5	4	3	8	2	9	1	7		0	0	0	0	0	0	0	0	0		6	5	4	3	8	2	9	1	7		4
GB12587	GB49368	FBgn0014011	Rac2	JNK cascade ; GO:0007254	JNK cascade		1.17745	1.1309	0.651126	0.642459	3.06071	0.393113	1.76587	1.03664	0		OK		7	6	4	3	9	2	8	5	1		0	0	0	0	0	0	0	0	0		7	6	4	3	9	2	8	5	1		4
GB12838	GB43176	FBgn0015286	Ras-related protein	JNK cascade ; GO:0007254	JNK cascade		2.27959	2.18947	1.12054	2.13228	94.8108	3.04434	88.1292	2.98475	65.5498		OK		4	3	1	2	9	6	8	5	7		0	0	0	0	0	0	0	0	0		4	3	1	2	9	6	8	5	7		4
GB13135	GB47431	FBgn0014020	Rho1	JNK cascade ; GO:0007254	JNK cascade		16.9209	10.3297	12.4234	13.3013	6.21257	6.38347	25.8072	7.28361	13.7941		OK		8	4	5	6	1	2	9	3	7		0	0	0	0	0	0	0	0	0		8	4	5	6	1	2	9	3	7		4
GB14469	GB44237	FBgn0004636	Roughened	JNK cascade ; GO:0007254	JNK cascade		69.706	66.117	67.2827	73.6266	16.6181	41.1509	20.5452	48.6458	59.088		OK		8	6	7	9	1	3	2	4	5		0	0	0	0	0	0	0	0	0		8	6	7	9	1	3	2	4	5		4
GB14925	GB50631	FBgn0010341	Cdc42	JNK cascade ; GO:0007254	JNK cascade		9.46203	11.667	10.3314	8.87051	0	9.81876	1.27843	12.1667	10.1177		OK		4	8	7	3	1	5	2	9	6		0	0	0	0	0	0	0	0	0		4	8	7	3	1	5	2	9	6		4
GB15424	GB53394	FBgn0003371	shaggy	JNK cascade ; GO:0007254	JNK cascade		44.6739	35.1274	37.1795	32.4144	10.923	23.7156	12.5651	25.7017	34.3848		OK		9	7	8	5	1	3	2	4	6		0	0	0	0	0	0	0	0	0		9	7	8	5	1	3	2	4	6		4
GB16401	GB56012	FBgn0000229	basket	JNK cascade ; GO:0007254	JNK cascade		313.2	286.753	188.234	47.992	33.4281	1202.87	111.388	499.62	172.485		OK		7	6	5	2	1	9	3	8	4		0	0	0	0	0	0	0	0	0		7	6	5	2	1	9	3	8	4		4
GB16764	GB44888	FBgn0033483	eiger	JNK cascade ; GO:0007254	JNK cascade		45.9587	6.56581	2.95428	10.2175	7.91327	6.66619	5.63979	19.5919	11.5857		OK		9	3	1	6	5	4	2	8	7		0	0	0	0	0	0	0	0	0		9	3	1	6	5	4	2	8	7		4
GB17167	GB51894	FBgn0010303	hemipterous	JNK cascade ; GO:0007254	JNK cascade		1.48677	1.47724	1.41755	1.17889	0.444227	1.14112	1.53778	1.97908	1.74996		OK		6	5	4	3	1	2	7	9	8		0	0	0	0	0	0	0	0	0		6	5	4	3	1	2	7	9	8		4
GB17935	GB45540	FBgn0000097	anterior open	JNK cascade ; GO:0007254	JNK cascade		3.7372	3.06993	4.35087	2.35729	26.6301	4.65164	18.1912	4.79556	7.70575		OK		3	2	4	1	9	5	8	6	7		0	0	0	0	0	0	0	0	0		3	2	4	1	9	5	8	6	7		4
GB20112	GB45657	FBgn0010341	Cdc42	JNK cascade ; GO:0007254	JNK cascade		8.7603	9.44194	6.43001	8.80597	5.49548	4.41145	5.74673	4.0805	7.2572		OK		7	9	5	8	3	2	4	1	6		0	0	0	0	0	0	0	0	0		7	9	5	8	3	2	4	1	6		4
GB19901	GB44634	FBgn0243512		JNK cascade	JNK cascade		53.1117	51.3321	149.782	60.072	20.0507	50.0944	35.0748	21.2507	38.3156		OK		7	6	9	8	1	5	3	2	4		0	0	0	0	0	0	0	0	0		7	6	9	8	1	5	3	2	4		4
GB11408	GB52985	FBgn0043884	multiple ankyrin repeats single KH domain	JAK-STAT cascade ; GO:0007259 and children	JAK-STAT ca		10.8066	7.50257	10.8649	7.29108	5.17331	4.23589	6.1187	11.598	11.2087		OK		6	5	7	4	2	1	3	9	8		0	0	0	0	0	0	0	0	0		6	5	7	4	2	1	3	9	8		4
GB12007	GB40911	FBgn0003612	Suppressor of variegation 2-10	JAK-STAT cascade ; GO:0007259 and children	JAK-STAT ca		1.23686	1.20712	0.661916	0.777507	10.7172	1.4209	13.7627	2.10764	2.35235		OK		4	3	1	2	8	5	9	6	7		0	0	0	0	0	0	0	0	0		4	3	1	2	8	5	9	6	7		4
GB12159	GB42244	FBgn0043903	domeless	JAK-STAT cascade ; GO:0007259 and children	JAK-STAT ca		1.18217	1.05845	1.13265	1.07766	2.60422	0.9254	2.70449	2.02188	2.61136		OK		5	2	4	3	7	1	9	6	8		0	0	0	0	0	0	0	0	0		5	2	4	3	7	1	9	6	8		4
GB14092	GB42304	FBgn0001319	knot	JAK-STAT cascade ; GO:0007259 and children	JAK-STAT ca		14.4306	6.87591	4.84901	9.79839	52.5063	8.12397	98.9115	11.0137	37.7823		OK		6	2	1	4	8	3	9	5	7		0	0	0	0	0	0	0	0	0		6	2	1	4	8	3	9	5	7		4
GB16422	GB44594	FBgn0004864	hopscotch	JAK-STAT cascade ; GO:0007259 and children	JAK-STAT ca		1.23532	1.09156	0.819754	0.866617	1.28446	1.97968	2.22319	1.13779	2.2233		OK		5	3	1	2	6	7	8	4	9		0	0	0	0	0	0	0	0	0		5	3	1	2	6	7	8	4	9		4
GB18923	GB50020	FBgn0016917	Signal-transducer and activator of transcription protein at 92E	JAK-STAT cascade ; GO:0007259 and children	JAK-STAT ca		2.18888	1.53222	1.39053	1.38809	5.7863	0.805117	10.2007	1.5829	4.95026		OK		6	4	3	2	8	1	9	5	7		0	0	0	0	0	0	0	0	0		6	4	3	2	8	1	9	5	7		4
GB14250	GB51500	FBgn0085402		JAK-STAT cascade	JAK-STAT ca		4.43564	5.35941	3.34769	5.69935	13.3378	3.22332	14.7829	7.10535	7.73051		OK		3	4	2	5	8	1	9	6	7		0	0	0	0	0	0	0	0	0		3	4	2	5	8	1	9	6	7		4
GB18949	GB55283	FBgn0041184		JAK-STAT cascade	JAK-STAT ca		1.96279	1.83283	2.34504	1.50871	5.43285	3.00352	9.81225	2.06777	3.12992		OK		3	2	5	1	8	6	9	4	7		0	0	0	0	0	0	0	0	0		3	2	5	1	8	6	9	4	7		4
GB10026	GB44490	FBgn0031213		immune-related	immune-rela		8.66621	6.10083	7.35197	5.29666	3.83989	5.34289	6.64624	6.43602	6.26457		OK		9	4	8	2	1	3	7	6	5		0	0	0	0	0	0	0	0	0		9	4	8	2	1	3	7	6	5		4
GB11320	GB53101	FBgn0020305		immune-related	immune-rela		4.9235	2.53639	3.52024	2.58178	0.775659	1.34493	0.447515	2.72815	1.66668		OK		9	5	8	6	2	3	1	7	4		0	0	0	0	0	0	0	0	0		9	5	8	6	2	3	1	7	4		4
GB11902	GB45882	FBgn0003326		immune-related	immune-rela		1.28454	1.05555	1.89426	1.40178	1.48404	0.857735	2.56864	1.62389	1.24009		OK		4	2	8	5	6	1	9	7	3		0	0	0	0	0	0	0	0	0		4	2	8	5	6	1	9	7	3		4
GB12454	GB48687	not found		immune-related	immune-rela		327.399	297.03	336.376	447.251	9.71935	30.9347	4.82053	14.7002	59.4164		OK		7	6	8	9	2	4	1	3	5		0	0	0	0	0	0	0	0	0		7	6	8	9	2	4	1	3	5		4
GB12883	GB50507	not found		immune-related	immune-rela		10.1037	6.44978	12.7191	13.8784	13.3455	5.14224	11.0875	3.922	14.338		OK		4	3	6	8	7	2	5	1	9		0	0	0	0	0	0	0	0	0		4	3	6	8	7	2	5	1	9		4
GB13522	GB47208	FBgn0030018		immune-related	immune-rela		1.05372	0.625098	0.609364	0.402625	4.2966	0.563347	5.88743	0.909519	1.4746		OK		6	4	3	1	8	2	9	5	7		0	0	0	0	0	0	0	0	0		6	4	3	1	8	2	9	5	7		4
GB13979	GB50509	not found		immune-related	immune-rela		5.33415	4.3986	3.60096	3.77491	1.82445	1.93322	7.89459	1.61612	3.48467		OK		8	7	5	6	2	3	9	1	4		0	0	0	0	0	0	0	0	0		8	7	5	6	2	3	9	1	4		4
GB14645	GB50508	FBgn0243514		immune-related	immune-rela		229.946	212.635	224.973	287.833	9.59939	24.3139	5.717	10.2701	49.718		OK		8	6	7	9	2	4	1	3	5		0	0	0	0	0	0	0	0	0		8	6	7	9	2	4	1	3	5		4
GB14962	GB54664	FBgn0027594		immune-related	immune-rela		2.7117	1.0387	1.07112	1.40915	1.95803	0.718534	4.19596	0.612159	2.10364		OK		8	3	4	5	6	2	9	1	7		0	0	0	0	0	0	0	0	0		8	3	4	5	6	2	9	1	7		4
GB15645	GB45138	FBgn0030505		immune-related	immune-rela		11.6725	9.39367	8.62157	8.73454	30.4484	8.65562	88.6957	6.79005	35.1529		OK		6	5	2	4	7	3	9	1	8		0	0	0	0	0	0	0	0	0		6	5	2	4	7	3	9	1	8		4
GB17018	GB42358	FBgn0087011		immune-related	immune-rela		1.01293	1.8874	1.26967	1.16855	7.72361	1.48801	12.3556	1.97567	6.0349		OK		1	5	3	2	8	4	9	6	7		0	0	0	0	0	0	0	0	0		1	5	3	2	8	4	9	6	7		4
GB18324	GB46478	FBgn0052226		immune-related	immune-rela		1.06591	0.676079	0.71673	0.470299	5.40216	0.884094	8.44543	0.65378	2.18426		OK		6	3	4	1	8	5	9	2	7		0	0	0	0	0	0	0	0	0		6	3	4	1	8	5	9	2	7		4
GB19452	GB42685	not found		immune-related	immune-rela		21.3834	11.5911	7.39553	10.8791	3.88318	4.52438	6.40112	2.90502	7.35059		OK		9	8	6	7	2	3	4	1	5		0	0	0	0	0	0	0	0	0		9	8	6	7	2	3	4	1	5		4
GB20003	GB42082	FBgn0041780		immune-related	immune-rela		1.80599	1.55201	0.992868	1.03728	0	1.42807	1.90072	1.38402	1.17981		OK		8	7	2	3	1	6	9	5	4		0	0	0	0	0	0	0	0	0		8	7	2	3	1	6	9	5	4		4
GB10009	GB50238	FBgn0003884	alpha-Tubulin at 84B	Immune system process (GO:0002376)	Immune syst		12.685	8.50364	17.1791	12.5514	0	7.145	2.07067	16.3401	12.6924		OK		6	4	9	5	1	3	2	8	7		0	0	0	0	0	0	0	0	0		6	4	9	5	1	3	2	8	7		4
GB10069	GB51712	FBgn0261560	Thor	Immune system process (GO:0002376)	Immune syst		23.432	21.8781	24.3211	14.9175	4.85341	22.545	7.9338	40.969	21.4367		OK		7	5	8	3	1	6	2	9	4		0	0	0	0	0	0	0	0	0		7	5	8	3	1	6	2	9	4		4
GB10124	GB46739	FBgn0013576	mustard	Immune system process (GO:0002376)	Immune syst		100.703	126.368	92.4845	113.532	50.3469	244.089	88.2527	301.813	106.057		OK		4	7	3	6	1	8	2	9	5		0	0	0	0	0	0	0	0	0		4	7	3	6	1	8	2	9	5		4
GB10171	GB55582	FBgn0261617	nejire	Immune system process (GO:0002376)	Immune syst		0.680487	0.326793	0.278746	0.235745	0	0.126219	0.377984	0.614472	0.703864		OK		8	5	4	3	1	2	6	7	9		0	0	0	0	0	0	0	0	0		8	5	4	3	1	2	6	7	9		4
GB10274	GB52588	FBgn0010247		Immune system process (GO:0002376)	Immune syst		1.59603	2.01133	1.7573	1.46951	1.39221	1.29342	1.55291	1.61772	1.99432		OK		5	9	7	3	2	1	4	6	8		0	0	0	0	0	0	0	0	0		5	9	7	3	2	1	4	6	8		4
GB10471	GB45135	FBgn0028982	Spt6	Immune system process (GO:0002376)	Immune syst		1.95988	1.24979	1.76686	1.22716	6.68143	1.81464	5.46102	2.39351	3.04081		OK		5	2	3	1	9	4	8	6	7		0	0	0	0	0	0	0	0	0		5	2	3	1	9	4	8	6	7		4
GB10524	GB55808	FBgn0020306		Immune system process (GO:0002376)	Immune syst		3.28272	0.832678	0.879838	0.926339	6.2459	0.628763	9.44717	1.14128	4.927		OK		6	2	3	4	8	1	9	5	7		0	0	0	0	0	0	0	0	0		6	2	3	4	8	1	9	5	7		4
GB10574	GB43216	FBgn0261547	Ephexin	Immune system process (GO:0002376)	Immune syst		4.09893	3.71818	3.2648	3.37792	9.0884	2.85682	14.3507	2.16843	5.69582		OK		6	5	3	4	8	2	9	1	7		0	0	0	0	0	0	0	0	0		6	5	3	4	8	2	9	1	7		4
GB10654	GB47452	FBgn0261797	Dynein heavy chain 64C	Immune system process (GO:0002376)	Immune syst		1.96777	0.744669	0.83577	0.501855	8.01445	0.968814	21.1703	1.23439	18.0651		OK		6	2	3	1	7	4	9	5	8		0	0	0	0	0	0	0	0	0		6	2	3	1	7	4	9	5	8		4
GB10667	GB50038	FBgn0001108	Glued	Immune system process (GO:0002376)	Immune syst		3.22978	1.92506	2.09711	2.26759	1.19087	1.87368	2.74828	3.16467	1.91915		OK		9	4	5	6	1	2	7	8	3		0	0	0	0	0	0	0	0	0		9	4	5	6	1	2	7	8	3		4
GB10718	GB53167	FBgn0085432		Immune system process (GO:0002376)	Immune syst		16.9957	15.3687	22.2189	18.0396	7.83324	14.4877	20.7891	9.06123	23.5641		OK		5	4	8	6	1	3	7	2	9		0	0	0	0	0	0	0	0	0		5	4	8	6	1	3	7	2	9		4
GB10863	GB41845	FBgn0036844	Mitogen-activated protein kinase phosphatase 3	Immune system process (GO:0002376)	Immune syst		1.42996	0.987153	1.1532	1.32362	1.03253	0.745968	1.48929	0.68597	1.2942		OK		8	3	5	7	4	2	9	1	6		0	0	0	0	0	0	0	0	0		8	3	5	7	4	2	9	1	6		4
GB10917	GB52158	FBgn0031975	Transglutaminase	Immune system process (GO:0002376)	Immune syst		9.21304	7.12022	7.87257	10.3212	5.94078	6.10421	12.8532	23.768	11.1695		OK		5	3	4	6	1	2	8	9	7		0	0	0	0	0	0	0	0	0		5	3	4	6	1	2	8	9	7		4
GB10996	GB53462	FBgn0005630	longitudinals lacking	Immune system process (GO:0002376)	Immune syst		3.40169	2.57938	3.96027	3.48889	214.082	4.18423	221.072	2.30377	40.556		OK		3	2	5	4	8	6	9	1	7		0	0	0	0	0	0	0	0	0		3	2	5	4	8	6	9	1	7		4
GB11052	GB43375	FBgn0040324	Ephrin	Immune system process (GO:0002376)	Immune syst		4.83919	3.9268	5.95182	2.96422	8.273	3.00154	11.0964	4.89108	8.40711		OK		4	3	6	1	7	2	9	5	8		0	0	0	0	0	0	0	0	0		4	3	6	1	7	2	9	5	8		4
GB11073	GB53490	FBgn0005630	longitudinals lacking	Immune system process (GO:0002376)	Immune syst		24.6991	19.6681	27.0229	22.8869	6.55143	13.7438	7.55967	18.1781	26.5904		OK		7	5	9	6	1	3	2	4	8		0	0	0	0	0	0	0	0	0		7	5	9	6	1	3	2	4	8		4
GB11075	GB47732	FBgn0260936	scrawny	Immune system process (GO:0002376)	Immune syst		0.725544	0.647086	0.318432	0.350101	1.7962	0.730555	3.10894	1.07633	1.50094		OK		4	3	1	2	8	5	9	6	7		0	0	0	0	0	0	0	0	0		4	3	1	2	8	5	9	6	7		4
GB11202	GB49929	FBgn0002526	Laminin A	Immune system process (GO:0002376)	Immune syst		1.82504	1.17838	0.987244	1.10948	138.161	3.58111	166.408	1.18868	40.4824		OK		5	3	1	2	8	6	9	4	7		0	0	0	0	0	0	0	0	0		5	3	1	2	8	6	9	4	7		4
GB11241	GB45708	FBgn0031975	Transglutaminase	Immune system process (GO:0002376)	Immune syst		96.321	119.786	136.769	162.405	48.6104	16.0409	22.868	47.6969	187.476		OK		5	6	7	8	4	1	2	3	9		0	0	0	0	0	0	0	0	0		5	6	7	8	4	1	2	3	9		4
GB11364	GB47224	FBgn0000568	Ecdysone-induced protein 75B	Immune system process (GO:0002376)	Immune syst		64.1353	34.4933	197.607	45.5799	16.9862	57.6339	44.4197	87.7893	154.742		OK		6	2	9	4	1	5	3	7	8		0	0	0	0	0	0	0	0	0		6	2	9	4	1	5	3	7	8		4
GB11410	GB52999	FBgn0027932	A kinase anchor protein 200	Immune system process (GO:0002376)	Immune syst		314.646	209.173	221.995	308.624	1242.23	124.094	1000.06	112.783	934.458		OK		6	3	4	5	9	2	8	1	7		0	0	0	0	0	0	0	0	0		6	3	4	5	9	2	8	1	7		4
GB11411	GB45655	FBgn0004837	Suppressor of Hairless	Immune system process (GO:0002376)	Immune syst		0.902839	0.751528	0.332845	0.750663	0.521529	0.167461	1.80537	0.326101	0		OK		8	7	4	6	5	2	9	3	1		0	0	0	0	0	0	0	0	0		8	7	4	6	5	2	9	3	1		4
GB11564	GB43099	FBgn0028982	Spt6	Immune system process (GO:0002376)	Immune syst		3.69354	2.07809	3.55995	2.8226	3.29452	1.26943	3.43948	2.34202	3.98898		OK		8	2	7	4	5	1	6	3	9		0	0	0	0	0	0	0	0	0		8	2	7	4	5	1	6	3	9		4
GB11581	GB53848	FBgn0036752	Adenosine deaminase-related growth factor A	Immune system process (GO:0002376)	Immune syst		1.97588	2.09637	1.89168	1.71925	3.58338	1.58529	2.75657	0.809111	2.13881		OK		5	6	4	3	9	2	8	1	7		0	0	0	0	0	0	0	0	0		5	6	4	3	9	2	8	1	7		4
GB11734	GB41654	FBgn0013799	Deformed epidermal autoregulatory factor-1	Immune system process (GO:0002376)	Immune syst		1.09682	1.30133	1.82358	1.25728	5.03139	0.179507	2.90285	1.7041	3.20329		OK		2	4	6	3	9	1	7	5	8		0	0	0	0	0	0	0	0	0		2	4	6	3	9	1	7	5	8		4
GB11906	GB45526	FBgn0021895		Immune system process (GO:0002376)	Immune syst		5.84751	4.79878	4.77545	3.4041	78.8875	4.44828	89.5478	5.96533	17.4561		OK		5	4	3	1	8	2	9	6	7		0	0	0	0	0	0	0	0	0		5	4	3	1	8	2	9	6	7		4
GB11941	GB43092	FBgn0013762	Cyclin-dependent kinase 5	Immune system process (GO:0002376)	Immune syst		15.9947	14.0613	16.8706	13.625	1.12859	6.71141	3.77661	14.4136	11.3169		OK		8	6	9	5	1	3	2	7	4		0	0	0	0	0	0	0	0	0		8	6	9	5	1	3	2	7	4		4
GB12005	GB42215	FBgn0004657	myospheroid	Immune system process (GO:0002376)	Immune syst		1.94827	1.39044	1.1306	1.70847	1.17232	0.331257	1.21746	0.806331	1.7633		OK		9	6	3	7	4	1	5	2	8		0	0	0	0	0	0	0	0	0		9	6	3	7	4	1	5	2	8		4
GB12053	GB50037	FBgn0003884	alpha-Tubulin at 84B	Immune system process (GO:0002376)	Immune syst		1.86709	2.20085	0.556229	2.2933	0	0.787077	1.97991	0.306539	1.75567		OK		6	8	3	9	1	4	7	2	5		0	0	0	0	0	0	0	0	0		6	8	3	9	1	4	7	2	5		4
GB12064	GB50654	FBgn0032363	CG6509	Immune system process (GO:0002376)	Immune syst		0.781179	0.719548	0.41704	0.668808	5.21529	1.0404	4.54543	0.711178	2.0664		OK		5	4	1	2	9	6	8	3	7		0	0	0	0	0	0	0	0	0		5	4	1	2	9	6	8	3	7		4
GB12173	GB54228	FBgn0029113	Smt3 activating enzyme 2	Immune system process (GO:0002376)	Immune syst		0.620355	0.978866	1.03461	0.552635	2.04772	0.969836	1.47678	1.46045	1.28333		OK		2	4	5	1	9	3	8	7	6		0	0	0	0	0	0	0	0	0		2	4	5	1	9	3	8	7	6		4
GB12207	GB54477	FBgn0003731	Epidermal growth factor receptor	Immune system process (GO:0002376)	Immune syst		15.0639	12.2097	11.9615	11.4764	26.932	10.3849	19.2867	11.1344	10.5333		OK		7	6	5	4	9	1	8	3	2		0	0	0	0	0	0	0	0	0		7	6	5	4	9	1	8	3	2		4
GB12209	GB55970	FBgn0005655	mutagen-sensitive 209	Immune system process (GO:0002376)	Immune syst		2.20211	2.4462	1.66742	1.54312	13.2988	3.05721	15.4566	1.6872	4.41748		OK		4	5	2	1	8	6	9	3	7		0	0	0	0	0	0	0	0	0		4	5	2	1	8	6	9	3	7		4
GB12228	GB55583	FBgn0261617	nejire	Immune system process (GO:0002376)	Immune syst		3.2844	2.16768	2.25517	2.09147	3.81005	1.33824	6.05626	2.05417	4.00985		OK		6	4	5	3	7	1	9	2	8		0	0	0	0	0	0	0	0	0		6	4	5	3	7	1	9	2	8		4
GB12280	GB44534	FBgn0039141	spastin	Immune system process (GO:0002376)	Immune syst		6.90114	0.684116	0.427926	1.38184	2.46869	0.704611	3.16512	2.20824	3.14344		OK		9	2	1	4	6	3	8	5	7		0	0	0	0	0	0	0	0	0		9	2	1	4	6	3	8	5	7		4
GB12288	GB42607	FBgn0264294	Cytochrome b5	Immune system process (GO:0002376)	Immune syst		12.5796	8.74786	10.7911	8.53208	2.12337	1.8636	6.12536	0.940453	0.760425		OK		9	7	8	6	4	3	5	2	1		0	0	0	0	0	0	0	0	0		9	7	8	6	4	3	5	2	1		4
GB12298	GB48789	FBgn0032363	CG6509	Immune system process (GO:0002376)	Immune syst		1.31237	0.432625	0.293848	0.424791	0.578208	0.457963	2.00158	0.632698	1.06986		OK		8	3	1	2	5	4	9	6	7		0	0	0	0	0	0	0	0	0		8	3	1	2	5	4	9	6	7		4
GB12312	GB47313	FBgn0003261	Rm62	Immune system process (GO:0002376)	Immune syst		12.7955	7.23723	8.38622	5.31938	1.84784	8.62314	4.6198	12.1319	8.82337		OK		9	4	5	3	1	6	2	8	7		0	0	0	0	0	0	0	0	0		9	4	5	3	1	6	2	8	7		4
GB12357	GB42600	FBgn0036844	Mitogen-activated protein kinase phosphatase 3	Immune system process (GO:0002376)	Immune syst		1.57881	1.83563	0.970085	1.10111	15.1201	1.61833	10.8005	2.9826	13.9239		OK		3	5	1	2	9	4	7	6	8		0	0	0	0	0	0	0	0	0		3	5	1	2	9	4	7	6	8		4
GB12373	GB46510	FBgn0010247	Poly-(ADP-ribose) polymerase	Immune system process (GO:0002376)	Immune syst		0.69016	0.464014	0.390138	0.49493	0.239204	0.921692	1.24208	1.10308	0.428322		OK		6	4	2	5	1	7	9	8	3		0	0	0	0	0	0	0	0	0		6	4	2	5	1	7	9	8	3		4
GB12465	GB45757	FBgn0003896	tailup	Immune system process (GO:0002376)	Immune syst		6.14306	7.6211	3.50494	8.83574	23.4459	14.9347	101.27	6.33955	125.947		OK		2	4	1	5	7	6	8	3	9		0	0	0	0	0	0	0	0	0		2	4	1	5	7	6	8	3	9		4
GB12478	GB49992	FBgn0021895	yantar	Immune system process (GO:0002376)	Immune syst		4.91115	5.28978	6.81119	5.08597	7.295	5.81696	2.80589	8.83774	3.91875		OK		3	5	7	4	8	6	1	9	2		0	0	0	0	0	0	0	0	0		3	5	7	4	8	6	1	9	2		4
GB12556	GB55472	FBgn0003205	Ras oncogene at 85D	Immune system process (GO:0002376)	Immune syst		12.1878	6.84116	13.7617	7.71117	1.37149	3.83132	4.74768	9.37964	8.34976		OK		8	4	9	5	1	2	3	7	6		0	0	0	0	0	0	0	0	0		8	4	9	5	1	2	3	7	6		4
GB12585	GB41629	FBgn0025936	Eph receptor tyrosine kinase	Immune system process (GO:0002376)	Immune syst		7.32207	5.85643	4.82818	8.17335	15.4742	4.37248	22.7022	4.82059	14.8833		OK		5	4	3	6	8	1	9	2	7		0	0	0	0	0	0	0	0	0		5	4	3	6	8	1	9	2	7		4
GB12639	GB55272	FBgn0011202	diaphanous	Immune system process (GO:0002376)	Immune syst		3.00194	4.07318	2.4008	3.23137	5.57384	2.41283	7.62267	1.6942	9.61092		OK		4	6	2	5	7	3	8	1	9		0	0	0	0	0	0	0	0	0		4	6	2	5	7	3	8	1	9		4
GB12643	GB55408	FBgn0030964	PDGF- and VEGF-related factor 1	Immune system process (GO:0002376)	Immune syst		13.7137	12.7385	10.1465	10.8375	106.08	7.89499	92.753	6.49158	46.6772		OK		6	5	3	4	9	2	8	1	7		0	0	0	0	0	0	0	0	0		6	5	3	4	9	2	8	1	7		4
GB12742	GB53016	FBgn0085407	PDGF- and VEGF-related factor 3	Immune system process (GO:0002376)	Immune syst		11.4036	10.206	7.59073	12.9966	30.6909	8.02801	51.3936	12.6376	30.2925		OK		4	3	1	6	8	2	9	5	7		0	0	0	0	0	0	0	0	0		4	3	1	6	8	2	9	5	7		4
GB12839	GB46452	FBgn0000996	double parked	Immune system process (GO:0002376)	Immune syst		1.00467	0.889565	0.713766	0.464978	1.3602	1.38015	2.19734	2.14752	1.16908		OK		4	3	2	1	6	7	9	8	5		0	0	0	0	0	0	0	0	0		4	3	2	1	6	7	9	8	5		4
GB13057	GB40690	FBgn0264707	RhoGEF3	Immune system process (GO:0002376)	Immune syst		8.57084	8.72006	8.53891	6.50902	22.2794	9.85868	28.279	6.60058	15.3876		OK		4	5	3	1	8	6	9	2	7		0	0	0	0	0	0	0	0	0		4	5	3	1	8	6	9	2	7		4
GB13109	GB44213	FBgn0014141	cheerio	Immune system process (GO:0002376)	Immune syst		4.86152	4.87388	2.88785	6.46842	16.6715	3.04027	11.6745	3.55104	7.24656		OK		4	5	1	6	9	2	8	3	7		0	0	0	0	0	0	0	0	0		4	5	1	6	9	2	8	3	7		4
GB13113	GB50397	FBgn0021873	Gef26	Immune system process (GO:0002376)	Immune syst		11.2307	15.9593	12.631	10.0267	3.41446	4.82403	13.9305	4.81644	8.4431		OK		6	9	7	5	1	3	8	2	4		0	0	0	0	0	0	0	0	0		6	9	7	5	1	3	8	2	4		4
GB13159	GB53150	FBgn0263289	scribbled	Immune system process (GO:0002376)	Immune syst		3.85751	2.85907	1.52077	3.16328	12.9448	2.55595	113.03	3.30711	70.3675		OK		6	3	1	4	7	2	9	5	8		0	0	0	0	0	0	0	0	0		6	3	1	4	7	2	9	5	8		4
GB13170	GB46539	FBgn0040068	vav	Immune system process (GO:0002376)	Immune syst		3.96116	2.62479	2.08286	2.15245	3.96032	2.82941	3.23694	3.39202	3.72298		OK		9	3	1	2	8	4	5	6	7		0	0	0	0	0	0	0	0	0		9	3	1	2	8	4	5	6	7		4
GB13192	GB49985	FBgn0259984		Immune system process (GO:0002376)	Immune syst		23.2881	23.0289	12.92	26.4359	42.2097	75.2928	76.1411	42.958	43.499		OK		3	2	1	4	5	8	9	6	7		0	0	0	0	0	0	0	0	0		3	2	1	4	5	8	9	6	7		4
GB13202	GB40333	FBgn0040324	Ephrin	Immune system process (GO:0002376)	Immune syst		36.1299	32.9888	26.4872	37.2278	131.673	32.1843	175.967	39.1708	87.0922		OK		4	3	1	5	8	2	9	6	7		0	0	0	0	0	0	0	0	0		4	3	1	5	8	2	9	6	7		4
GB13381	GB52563	FBgn0000212	brahma	Immune system process (GO:0002376)	Immune syst		8.44893	6.51394	8.78781	5.01869	23.043	4.14912	21.5004	6.70435	11.1346		OK		5	3	6	2	9	1	8	4	7		0	0	0	0	0	0	0	0	0		5	3	6	2	9	1	8	4	7		4
GB13405	GB54530	FBgn0031216	CG11376	Immune system process (GO:0002376)	Immune syst		0.380459	0.316696	0.264939	0.296561	4.94491	0.564548	6.2765	0.455204	1.29865		OK		4	3	1	2	8	6	9	5	7		0	0	0	0	0	0	0	0	0		4	3	1	2	8	6	9	5	7		4
GB13459	GB51481	FBgn0031464	Dual oxidase	Immune system process (GO:0002376)	Immune syst		4.48239	5.51	4.70675	5.51469	23.4774	4.02053	23.9132	3.79458	12.8711		OK		3	5	4	6	8	2	9	1	7		0	0	0	0	0	0	0	0	0		3	5	4	6	8	2	9	1	7		4
GB13523	GB53472	FBgn0005630	longitudinals lacking	Immune system process (GO:0002376)	Immune syst		3.65951	3.28051	3.44778	2.56727	26.4241	0.746653	22.5631	2.23053	9.08454		OK		6	4	5	3	9	1	8	2	7		0	0	0	0	0	0	0	0	0		6	4	5	3	9	1	8	2	7		4
GB13567	GB41547	FBgn0259099	Doublecortin-domain-containing echinoderm-microtubule-associated protein ortholog	Immune system process (GO:0002376)	Immune syst		5.28683	6.9183	5.30137	7.20023	7.49298	8.59588	8.94087	4.51218	8.29416		OK		2	4	3	5	6	8	9	1	7		0	0	0	0	0	0	0	0	0		2	4	3	5	6	8	9	1	7		4
GB13582	GB54852	FBgn0032006	PDGF- and VEGF-receptor related	Immune system process (GO:0002376)	Immune syst		1.71923	1.23845	1.0375	1.38797	2.66015	2.25499	6.29254	1.33067	2.38164		OK		5	2	1	4	8	6	9	3	7		0	0	0	0	0	0	0	0	0		5	2	1	4	8	6	9	3	7		4
GB13642	GB41009	FBgn0031975	Transglutaminase	Immune system process (GO:0002376)	Immune syst		2.95121	2.48023	1.81335	4.31328	0	1.02637	0	3.99737	1.14473		OK		7	6	5	9	1	3	1	8	4		0	0	0	0	0.5	0	0.5	0	0		7	6	5	9	1.5	3	1.5	8	4		4
GB13665	GB49498	FBgn0038046	CG5641	Immune system process (GO:0002376)	Immune syst		1.74651	1.90946	1.68961	1.76689	3.54182	1.40607	4.45842	1.13248	2.65212		OK		4	6	3	5	8	2	9	1	7		0	0	0	0	0	0	0	0	0		4	6	3	5	8	2	9	1	7		4
GB13670	GB46338	FBgn0043550	Tetraspanin 68C	Immune system process (GO:0002376)	Immune syst		0.607891	0.766316	0.490237	0.503455	7.24249	1.05706	7.97721	0.87484	3.77265		OK		3	4	1	2	8	6	9	5	7		0	0	0	0	0	0	0	0	0		3	4	1	2	8	6	9	5	7		4
GB13747	GB47828	FBgn0011764		Immune system process (GO:0002376)	Immune syst		2.48072	1.92334	2.13029	2.09675	4.92053	3.35951	11.0567	3.05647	8.0688		OK		4	1	3	2	7	6	9	5	8		0	0	0	0	0	0	0	0	0		4	1	3	2	7	6	9	5	8		4
GB13819	GB51694	FBgn0003447	singed	Immune system process (GO:0002376)	Immune syst		1.5109	1.71388	1.07242	1.25894	0.902874	2.00038	0.911595	1.32316	1.05085		OK		7	8	4	5	1	9	2	6	3		0	0	0	0	0	0	0	0	0		7	8	4	5	1	9	2	6	3		4
GB13884	GB49904	FBgn0000490	decapentaplegic	Immune system process (GO:0002376)	Immune syst		0.897818	0.258698	0.330994	0.279933	556.229	14.6879	701.076	0.790452	425.977		OK		5	1	3	2	8	6	9	4	7		0	0	0	0	0	0	0	0	0		5	1	3	2	8	6	9	4	7		4
GB13967	GB40759	FBgn0043841	virus-induced RNA 1	Immune system process (GO:0002376)	Immune syst		195.242	67.0895	66.3679	67.0634	16.2383	20.003	36.6229	36.114	67.1402		OK		9	7	5	6	1	2	4	3	8		0	0	0	0	0	0	0	0	0		9	7	5	6	1	2	4	3	8		4
GB14060	GB48932	FBgn0260935	immune response deficient 1	Immune system process (GO:0002376)	Immune syst		4.40343	3.98056	3.86218	3.54007	3.44142	4.52581	6.04289	6.28013	7.34111		OK		5	4	3	2	1	6	7	8	9		0	0	0	0	0	0	0	0	0		5	4	3	2	1	6	7	8	9		4
GB14141	GB52278	FBgn0014141	cheerio	Immune system process (GO:0002376)	Immune syst		22.1315	37.3291	24.4383	46.0444	7.17397	20.1648	13.6906	19.7545	25.6916		OK		5	8	6	9	1	4	2	3	7		0	0	0	0	0	0	0	0	0		5	8	6	9	1	4	2	3	7		4
GB14169	GB50932	FBgn0003117	pannier	Immune system process (GO:0002376)	Immune syst		3.27224	2.18184	1.97737	2.63497	4.21786	2.22714	9.86914	4.15748	6.29379		OK		5	2	1	4	7	3	9	6	8		0	0	0	0	0	0	0	0	0		5	2	1	4	7	3	9	6	8		4
GB14289	GB51067	FBgn0082598	akirin	Immune system process (GO:0002376)	Immune syst		2.16012	1.95269	2.10802	1.11426	1.65151	2.93429	3.49372	2.51709	1.8729		OK		6	4	5	1	2	8	9	7	3		0	0	0	0	0	0	0	0	0		6	4	5	1	2	8	9	7	3		4
GB14441	GB56005	FBgn0026379	Pten	Immune system process (GO:0002376)	Immune syst		1.74458	0.394261	0.788192	0.319968	4.44601	0.799455	3.33465	1.112	0.796107		OK		7	2	3	1	9	5	8	6	4		0	0	0	0	0	0	0	0	0		7	2	3	1	9	5	8	6	4		4
GB14446	GB44948	FBgn0259099	Doublecortin-domain-containing echinoderm-microtubule-associated protein ortholog	Immune system process (GO:0002376)	Immune syst		4.10851	3.69946	3.33587	7.72033	5.72134	4.28657	5.86829	4.17368	7.9681		OK		3	2	1	8	6	5	7	4	9		0	0	0	0	0	0	0	0	0		3	2	1	8	6	5	7	4	9		4
GB14487	GB44982	FBgn0010395	beta[nu] integrin	Immune system process (GO:0002376)	Immune syst		2.0454	2.0768	0.682251	0.979386	5.06371	1.31701	2.62935	0.692614	1.2694		OK		6	7	1	3	9	5	8	2	4		0	0	0	0	0	0	0	0	0		6	7	1	3	9	5	8	2	4		4
GB14518	GB55704	FBgn0026207	members only	Immune system process (GO:0002376)	Immune syst		10.0512	7.61303	5.09035	8.35582	157.014	9.14009	62.8989	9.78219	19.0397		OK		6	2	1	3	9	4	8	5	7		0	0	0	0	0	0	0	0	0		6	2	1	3	9	4	8	5	7		4
GB14545	GB42785	FBgn0039702	Vacuolar protein sorting 16B	Immune system process (GO:0002376)	Immune syst		5.93821	6.73761	7.37757	5.59517	1.13085	6.2092	2.60976	15.5561	7.28966		OK		4	6	8	3	1	5	2	9	7		0	0	0	0	0	0	0	0	0		4	6	8	3	1	5	2	9	7		4
GB14602	GB43446	FBgn0040505		Immune system process (GO:0002376)	Immune syst		4.1135	3.23724	3.01713	3.47499	4.85189	2.80426	9.58217	2.75666	7.28442		OK		6	4	3	5	7	2	9	1	8		0	0	0	0	0	0	0	0	0		6	4	3	5	7	2	9	1	8		4
GB14619	GB42579	FBgn0262738	no receptor potential A	Immune system process (GO:0002376)	Immune syst		2.55289	1.59911	1.85845	1.83852	5.04919	1.01909	9.84913	1.39065	3.87478		OK		6	3	5	4	8	1	9	2	7		0	0	0	0	0	0	0	0	0		6	3	5	4	8	1	9	2	7		4
GB14763	GB53451	FBgn0005630	longitudinals lacking	Immune system process (GO:0002376)	Immune syst		0.786427	2.3919	1.77178	1.22601	0	0.437606	7.86292	0.177534	8.13444		OK		4	7	6	5	1	3	8	2	9		0	0	0	0	0	0	0	0	0		4	7	6	5	1	3	8	2	9		4
GB14801	GB49927	FBgn0050420	Activating transcription factor-2	Immune system process (GO:0002376)	Immune syst		1.51532	1.27349	0.581924	0.959698	2.46187	1.3175	3.78766	1.34694	2.05719		OK		6	3	1	2	8	4	9	5	7		0	0	0	0	0	0	0	0	0		6	3	1	2	8	4	9	5	7		4
GB14813	GB42608	FBgn0264294	Cytochrome b5	Immune system process (GO:0002376)	Immune syst		140.804	111.458	96.8437	112.971	43.6041	21.3377	51.3209	17.3813	77.4534		OK		9	7	6	8	3	2	4	1	5		0	0	0	0	0	0	0	0	0		9	7	6	8	3	2	4	1	5		4
GB14837	GB53251	FBgn0243511		Immune system process (GO:0002376)	Immune syst		2.18643	1.1765	1.53767	0.677606	10.2714	1.80297	13.6958	3.79998	4.57758		OK		5	2	3	1	8	4	9	6	7		0	0	0	0	0	0	0	0	0		5	2	3	1	8	4	9	6	7		4
GB14882	GB53826	FBgn0011766	E2F transcription factor	Immune system process (GO:0002376)	Immune syst		2.20777	1.55158	1.35654	1.13328	1.39975	0.868944	2.69194	1.714	2.00512		OK		8	5	3	2	4	1	9	6	7		0	0	0	0	0	0	0	0	0		8	5	3	2	4	1	9	6	7		4
GB14945	GB53149	FBgn0263289	scribbled	Immune system process (GO:0002376)	Immune syst		12.0773	6.49765	4.51943	8.10455	7.0814	10.9901	25.6485	11.7154	14.6525		OK		7	2	1	4	3	5	9	6	8		0	0	0	0	0	0	0	0	0		7	2	1	4	3	5	9	6	8		4
GB15003	GB53487	FBgn0005630	longitudinals lacking	Immune system process (GO:0002376)	Immune syst		5.00774	4.16231	5.56221	3.75331	5.00667	3.0009	10.5915	2.73925	1.793		OK		7	5	8	4	6	3	9	2	1		0	0	0	0	0	0	0	0	0		7	5	8	4	6	3	9	2	1		4
GB15155	GB48639	FBgn0004197	Serrate	Immune system process (GO:0002376)	Immune syst		7.32163	6.73394	5.62339	7.98735	14.1608	4.85619	19.4447	5.84396	14.1997		OK		5	4	2	6	7	1	9	3	8		0	0	0	0	0	0	0	0	0		5	4	2	6	7	1	9	3	8		4
GB15156	GB53491	FBgn0005630	longitudinals lacking	Immune system process (GO:0002376)	Immune syst		5.56416	4.5734	4.99679	5.75508	11.1259	4.287	9.09371	5.72489	11.6213		OK		4	2	3	6	8	1	7	5	9		0	0	0	0	0	0	0	0	0		4	2	3	6	8	1	7	5	9		4
GB15281	GB55293	FBgn0260934	par-1	Immune system process (GO:0002376)	Immune syst		10.6675	13.3934	7.38779	12.1204	6.65825	24.4983	10.6205	13.2857	16.9718		OK		4	7	2	5	1	9	3	6	8		0	0	0	0	0	0	0	0	0		4	7	2	5	1	9	3	6	8		4
GB15447	GB45431	FBgn0014380	rho-like	Immune system process (GO:0002376)	Immune syst		10.7384	11.575	12.5624	10.0518	4.46948	12.8379	10.0802	22.802	11.0588		OK		4	6	7	2	1	8	3	9	5		0	0	0	0	0	0	0	0	0		4	6	7	2	1	8	3	9	5		4
GB15719	GB50640	FBgn0086899	Tousled-like kinase	Immune system process (GO:0002376)	Immune syst		4.84999	5.01064	6.47691	5.67769	3.25649	3.56516	9.84147	6.24198	7.66375		OK		3	4	7	5	1	2	9	6	8		0	0	0	0	0	0	0	0	0		3	4	7	5	1	2	9	6	8		4
GB15805	GB40436	FBgn0023167	Small ribonucleoprotein particle protein SmD3	Immune system process (GO:0002376)	Immune syst		84.8457	55.0479	83.4651	53.944	12.9955	33.0247	21.422	44.2566	69.8095		OK		9	6	8	5	1	3	2	4	7		0	0	0	0	0	0	0	0	0		9	6	8	5	1	3	2	4	7		4
GB16114	GB54297	FBgn0021875	Zinc finger protein RP-8	Immune system process (GO:0002376)	Immune syst		4.10825	2.73174	3.39807	2.95598	4.79194	7.0779	13.8235	7.70478	6.37408		OK		4	1	3	2	5	7	9	8	6		0	0	0	0	0	0	0	0	0		4	1	3	2	5	7	9	8	6		4
GB16187	GB49505	FBgn0036980	RhoBTB	Immune system process (GO:0002376)	Immune syst		2.24561	1.23818	1.58421	0.875204	5.0446	1.01816	7.27618	1.43633	2.58084		OK		6	3	5	1	8	2	9	4	7		0	0	0	0	0	0	0	0	0		6	3	5	1	8	2	9	4	7		4
GB16396	GB41740	FBgn0021760	chromosome bows	Immune system process (GO:0002376)	Immune syst		7.40566	10.0726	6.0465	10.1969	4.0742	4.41054	5.79256	3.70755	8.75437		OK		6	8	5	9	2	3	4	1	7		0	0	0	0	0	0	0	0	0		6	8	5	9	2	3	4	1	7		4
GB16409	GB43185	FBgn0031537	sec5	Immune system process (GO:0002376)	Immune syst		2.47811	2.01583	2.28398	1.99077	1.09553	0.802035	0.884887	1.16452	2.74633		OK		8	6	7	5	3	1	2	4	9		0	0	0	0	0	0	0	0	0		8	6	7	5	3	1	2	4	9		4
GB16431	GB52721	FBgn0002576	lozenge	Immune system process (GO:0002376)	Immune syst		14.9636	6.4862	7.05403	7.95136	14.4747	6.01246	23.099	6.61958	14.338		OK		8	2	4	5	7	1	9	3	6		0	0	0	0	0	0	0	0	0		8	2	4	5	7	1	9	3	6		4
GB16457	GB45131	FBgn0003963	u-shaped	Immune system process (GO:0002376)	Immune syst		0.593861	0.712981	0.587884	0.720073	0.285872	0.49568	0.4948	0.580938	0.921394		OK		6	7	5	8	1	3	2	4	9		0	0	0	0	0	0	0	0	0		6	7	5	8	1	3	2	4	9		4
GB16508	GB49120	FBgn0003079	pole hole	Immune system process (GO:0002376)	Immune syst		0.511342	0.368346	0.261825	0.332152	1.10767	0.521648	0.426046	0.346302	0.925591		OK		6	4	1	2	9	7	5	3	8		0	0	0	0	0	0	0	0	0		6	4	1	2	9	7	5	3	8		4
GB16550	GB46540	FBgn0264294	Cytochrome b5	Immune system process (GO:0002376)	Immune syst		5.59885	5.43472	6.25818	6.26774	9.28973	3.71205	14.888	5.36496	4.99029		OK		5	4	6	7	8	1	9	3	2		0	0	0	0	0	0	0	0	0		5	4	6	7	8	1	9	3	2		4
gb16573	GB49979	FBgn0043550	Tetraspanin 68C	Immune system process (GO:0002376)	Immune syst		3.52698	2.66898	1.97011	3.41569	15.7433	5.35249	19.2348	3.76388	5.30639		OK		4	2	1	3	8	7	9	5	6		0	0	0	0	0	0	0	0	0		4	2	1	3	8	7	9	5	6		4
GB16611	GB55798	FBgn0027491	Cdk5 activator-like protein	Immune system process (GO:0002376)	Immune syst		10.7682	7.04433	7.91891	10.3764	16.163	9.34181	38.5725	9.70446	17.365		OK		6	1	2	5	7	3	9	4	8		0	0	0	0	0	0	0	0	0		6	1	2	5	7	3	9	4	8		4
GB16613	GB40656	FBgn0011823	Pendulin	Immune system process (GO:0002376)	Immune syst		5.7359	5.57801	5.90334	3.46505	8.07634	4.86739	5.73492	6.65236	6.89706		OK		5	3	6	1	9	2	4	7	8		0	0	0	0	0	0	0	0	0		5	3	6	1	9	2	4	7	8		4
GB16680	GB51745	FBgn0037116	CG7158	Immune system process (GO:0002376)	Immune syst		0.54783	0.676508	0.471254	0.463626	2.03436	0.992905	1.33022	0.720826	0.58284		OK		3	5	2	1	9	7	8	6	4		0	0	0	0	0	0	0	0	0		3	5	2	1	9	7	8	6	4		4
GB16711	GB41850	FBgn0029167	Hemolectin	Immune system process (GO:0002376)	Immune syst		2.06376	1.841	1.45954	1.71866	4.94178	2.21169	6.1726	1.97903	4.05039		OK		5	3	1	2	8	6	9	4	7		0	0	0	0	0	0	0	0	0		5	3	1	2	8	6	9	4	7		4
GB16736	GB48230	FBgn0050420	Activating transcription factor-2	Immune system process (GO:0002376)	Immune syst		1.52371	1.26627	1.14207	1.08663	1.68545	0.968133	3.29541	0.790408	2.11259		OK		6	5	4	3	7	2	9	1	8		0	0	0	0	0	0	0	0	0		6	5	4	3	7	2	9	1	8		4
GB16739	GB55914	FBgn0261524	licorne	Immune system process (GO:0002376)	Immune syst		2.01769	1.93792	1.91276	1.43794	3.49657	4.45887	2.88192	4.33363	1.60997		OK		5	4	3	1	7	9	6	8	2		0	0	0	0	0	0	0	0	0		5	4	3	1	7	9	6	8	2		4
GB16821	GB52515	FBgn0002526	Laminin A	Immune system process (GO:0002376)	Immune syst		5.45807	5.74157	3.35367	4.05187	4.50411	35.5779	9.09523	21.1225	4.83907		OK		5	6	1	2	3	9	7	8	4		0	0	0	0	0	0	0	0	0		5	6	1	2	3	9	7	8	4		4
GB16921	GB40741	FBgn0052133	ptip	Immune system process (GO:0002376)	Immune syst		1.28559	0.903036	0.990345	0.673046	3.15892	0.811455	10.7434	0.922631	3.27476		OK		6	3	5	1	7	2	9	4	8		0	0	0	0	0	0	0	0	0		6	3	5	1	7	2	9	4	8		4
GB17030	GB50930	FBgn0003507		Immune system process (GO:0002376)	Immune syst		5.48702	3.13697	5.57322	4.30613	1.94057	2.13935	2.23922	3.1599	5.09639		OK		8	4	9	6	1	2	3	5	7		0	0	0	0	0	0	0	0	0		8	4	9	6	1	2	3	5	7		4
GB17138	GB51962	FBgn0086902	kismet	Immune system process (GO:0002376)	Immune syst		4.27825	2.70664	3.12346	2.21789	4.78898	3.53866	10.9837	4.61644	7.98234		OK		5	2	3	1	7	4	9	6	8		0	0	0	0	0	0	0	0	0		5	2	3	1	7	4	9	6	8		4
GB17192	GB52973	FBgn0260866	defense repressor 1	Immune system process (GO:0002376)	Immune syst		3.31299	1.99171	1.88485	2.35287	11.6952	3.15445	15.5807	2.69243	6.54901		OK		6	2	1	3	8	5	9	4	7		0	0	0	0	0	0	0	0	0		6	2	1	3	8	5	9	4	7		4
GB17303	GB49949	FBgn0035850	Autophagy-specific gene 18	Immune system process (GO:0002376)	Immune syst		5.46603	4.69214	4.03027	6.33774	4.73621	5.77897	5.46509	4.39591	7.42062		OK		6	3	1	8	4	7	5	2	9		0	0	0	0	0	0	0	0	0		6	3	1	8	4	7	5	2	9		4
GB17556	GB54853	FBgn0032006	PDGF- and VEGF-receptor related	Immune system process (GO:0002376)	Immune syst		1.11707	0.643743	0.823646	1.3061	6.29146	0.808066	7.25968	0.832175	3.81296		OK		5	1	3	6	8	2	9	4	7		0	0	0	0	0	0	0	0	0		5	1	3	6	8	2	9	4	7		4
GB17628	GB46302	FBgn0262738	no receptor potential A	Immune system process (GO:0002376)	Immune syst		1.32009	1.15765	0.899281	0.514491	3.48122	1.50106	6.31237	0.796841	3.47296		OK		5	4	3	1	8	6	9	2	7		0	0	0	0	0	0	0	0	0		5	4	3	1	8	6	9	2	7		4
GB17687	GB55584	FBgn0016794	daughter of sevenless	Immune system process (GO:0002376)	Immune syst		2.35579	1.39241	1.19299	1.33182	2.24313	0.907531	44.5195	0.701293	1.36564		OK		8	6	3	4	7	2	9	1	5		0	0	0	0	0	0	0	0	0		8	6	3	4	7	2	9	1	5		4
GB17764	GB40429	FBgn0015790	Rab-protein 11	Immune system process (GO:0002376)	Immune syst		43.2051	33.2509	57.632	32.5981	6.39938	33.0826	8.30725	52.2058	35.8088		OK		7	5	9	3	1	4	2	8	6		0	0	0	0	0	0	0	0	0		7	5	9	3	1	4	2	8	6		4
GB17971	GB51743	FBgn0000490	decapentaplegic	Immune system process (GO:0002376)	Immune syst		1.70515	0.503919	0.48356	0.613445	1.13652	0.21896	0.98357	1.11038	0.61052		OK		9	3	2	5	8	1	6	7	4		0	0	0	0	0	0	0	0	0		9	3	2	5	8	1	6	7	4		4
GB18039	GB45082	FBgn0015296	SHC-adaptor protein	Immune system process (GO:0002376)	Immune syst		0.706079	0.565138	0.537141	0.445542	0.582671	1.02901	2.68936	1.13854	2.08667		OK		5	3	2	1	4	6	9	7	8		0	0	0	0	0	0	0	0	0		5	3	2	1	4	6	9	7	8		4
GB18366	GB41829	FBgn0034366	Autophagy-specific gene 7	Immune system process (GO:0002376)	Immune syst		1.97455	1.20111	1.23347	1.30826	0.855457	1.72135	1.97422	2.96424	3.36994		OK		7	2	3	4	1	5	6	8	9		0	0	0	0	0	0	0	0	0		7	2	3	4	1	5	6	8	9		4
GB18378	GB43282	FBgn0004435	G protein alpha49B	Immune system process (GO:0002376)	Immune syst		10.6596	10.1966	8.23594	7.11553	24.7804	162.176	46.2126	74.4606	19.9899		OK		4	3	2	1	6	9	7	8	5		0	0	0	0	0	0	0	0	0		4	3	2	1	6	9	7	8	5		4
GB18613	GB52625	FBgn0003118	pointed	Immune system process (GO:0002376)	Immune syst		34.3172	29.9641	36.2385	32.25	9.01066	16.6846	11.0163	16.2486	34.7278		OK		7	5	9	6	1	4	2	3	8		0	0	0	0	0	0	0	0	0		7	5	9	6	1	4	2	3	8		4
GB18619	GB50333	FBgn0261592	Ribosomal protein S6	Immune system process (GO:0002376)	Immune syst		707.684	721.679	742.221	741.487	149.219	212.437	65.6446	673.242	963.562		OK		5	6	8	7	2	3	1	4	9		0	0	0	0	0	0	0	0	0		5	6	8	7	2	3	1	4	9		4
GB18627	GB48763	FBgn0000022	achaete	Immune system process (GO:0002376)	Immune syst		0.785676	0.335385	0.0536392	0.476327	6.80774	0.194306	7.41901	0.295607	1.35445		OK		6	4	1	5	8	2	9	3	7		0	0	0	0	0	0	0	0	0		6	4	1	5	8	2	9	3	7		4
GB18643	GB47453	FBgn0261797	Dynein heavy chain 64C	Immune system process (GO:0002376)	Immune syst		2.95555	1.25161	1.17215	1.34039	4.65623	1.13628	5.64145	0.928024	1.75087		OK		7	4	3	5	8	2	9	1	6		0	0	0	0	0	0	0	0	0		7	4	3	5	8	2	9	1	6		4
GB18722	GB54764	FBgn0026404	Nedd2-like caspase	Immune system process (GO:0002376)	Immune syst		56.0992	58.768	59.8655	53.976	11.7036	58.1235	23.4082	81.474	39.9572		OK		5	7	8	4	1	6	2	9	3		0	0	0	0	0	0	0	0	0		5	7	8	4	1	6	2	9	3		4
GB18769	GB55827	FBgn0015521	Ribosomal protein S21	Immune system process (GO:0002376)	Immune syst		449.829	404.14	530.897	427.473	89.9119	121.544	43.2287	240.224	315.555		OK		8	6	9	7	2	3	1	4	5		0	0	0	0	0	0	0	0	0		8	6	9	7	2	3	1	4	5		4
GB18813	GB51292	FBgn0260642	Antennapedia	Immune system process (GO:0002376)	Immune syst		5.19324	4.53071	5.90325	7.96114	27.7491	7.1281	108.607	9.08579	12.0862		OK		2	1	3	5	8	4	9	6	7		0	0	0	0	0	0	0	0	0		2	1	3	5	8	4	9	6	7		4
GB18882	GB42706	FBgn0011766		Immune system process (GO:0002376)	Immune syst		1.97926	1.7822	1.7482	1.90094	5.35934	1.39636	7.24426	1.86704	4.82567		OK		6	3	2	5	8	1	9	4	7		0	0	0	0	0	0	0	0	0		6	3	2	5	8	1	9	4	7		4
GB18918	GB49657	FBgn0004606	Zn finger homeodomain 1	Immune system process (GO:0002376)	Immune syst		73.419	63.6063	64.4274	74.9136	30.4621	240.801	64.9868	153.403	61.2689		OK		6	3	4	7	1	9	5	8	2		0	0	0	0	0	0	0	0	0		6	3	4	7	1	9	5	8	2		4
GB18989	GB42321	FBgn0000543	ecdysoneless	Immune system process (GO:0002376)	Immune syst		1.22703	1.10781	0.934887	0.688644	8.9309	1.25632	14.9673	2.82539	4.26447		OK		4	3	2	1	8	5	9	6	7		0	0	0	0	0	0	0	0	0		4	3	2	1	8	5	9	6	7		4
GB19031	GB46056	FBgn0032209	Hand	Immune system process (GO:0002376)	Immune syst		1.99506	1.67666	2.23279	1.99943	1.23477	1.46698	11.0422	2.36449	13.0449		OK		4	3	6	5	1	2	8	7	9		0	0	0	0	0	0	0	0	0		4	3	6	5	1	2	8	7	9		4
GB19155	GB49172	FBgn0000541	Enhancer of bithorax	Immune system process (GO:0002376)	Immune syst		3.16414	2.19065	2.30062	1.66481	113.322	3.56049	56.8569	3.3691	4.99109		OK		4	2	3	1	9	6	8	5	7		0	0	0	0	0	0	0	0	0		4	2	3	1	9	6	8	5	7		4
GB19160	GB45689	FBgn0038760	Mediator complex subunit 25	Immune system process (GO:0002376)	Immune syst		3.13654	2.93798	3.51098	2.39646	3.76719	3.12776	4.03644	3.23887	3.56551		OK		4	2	6	1	8	3	9	5	7		0	0	0	0	0	0	0	0	0		4	2	6	1	8	3	9	5	7		4
GB19168	GB47837	FBgn0011764	Dorsal switch protein 1	Immune system process (GO:0002376)	Immune syst		11.2088	9.16534	11.4475	6.6118	6.56228	8.76564	9.08662	10.053	9.87041		OK		8	5	9	2	1	3	4	7	6		0	0	0	0	0	0	0	0	0		8	5	9	2	1	3	4	7	6		4
GB19246	GB44931	FBgn0028436	ECSIT	Immune system process (GO:0002376)	Immune syst		6.21863	4.85922	10.0382	3.77926	1.82655	9.20804	1.58074	24.8408	6.54129		OK		5	4	8	3	2	7	1	9	6		0	0	0	0	0	0	0	0	0		5	4	8	3	2	7	1	9	6		4
GB19301	GB47805	FBgn0043575	PGRP-SC2	Immune system process (GO:0002376)	Immune syst		18.4364	8.85377	7.44146	12.7473	2.6736	4.33535	6.17012	1.09709	2.87243		OK		9	7	6	8	2	4	5	1	3		0	0	0	0	0	0	0	0	0		9	7	6	8	2	4	5	1	3		4
GB19311	GB49159	FBgn0031145	Nuclear transport factor-2	Immune system process (GO:0002376)	Immune syst		8.23154	8.13201	10.1156	8.06624	0	1.57043	1.17573	10.0345	10.947		OK		6	5	8	4	1	3	2	7	9		0	0	0	0	0	0	0	0	0		6	5	8	4	1	3	2	7	9		4
GB19423	GB45127	FBgn0028541	TM9SF4	Immune system process (GO:0002376)	Immune syst		1.32698	0.902783	0.679458	0.833229	0.319389	1.1281	0.737083	0.94861	0.915042		OK		9	5	2	4	1	8	3	7	6		0	0	0	0	0	0	0	0	0		9	5	2	4	1	8	3	7	6		4
GB19455	GB43567	FBgn0020377	Scavenger receptor class C, type II	Immune system process (GO:0002376)	Immune syst		2.19164	1.87396	2.72612	2.14585	2.08429	2.79601	2.13782	3.96409	2.15635		OK		6	1	7	4	2	8	3	9	5		0	0	0	0	0	0	0	0	0		6	1	7	4	2	8	3	9	5		4
GB19525	GB47743	FBgn0261854	atypical protein kinase C	Immune system process (GO:0002376)	Immune syst		5.08048	4.18522	3.40981	5.17864	5.75664	4.06656	11.9175	4.04945	4.3657		OK		6	4	1	7	8	3	9	2	5		0	0	0	0	0	0	0	0	0		6	4	1	7	8	3	9	2	5		4
GB19541	GB47201	FBgn0004657	myospheroid	Immune system process (GO:0002376)	Immune syst		4.42163	4.01519	2.98852	3.38392	2.43808	1.9907	5.02373	5.22679	4.73985		OK		6	5	3	4	2	1	8	9	7		0	0	0	0	0	0	0	0	0		6	5	3	4	2	1	8	9	7		4
GB19783	GB45615	FBgn0029167	Hemolectin	Immune system process (GO:0002376)	Immune syst		3.21009	1.11337	0.657472	0.973081	0	1.48854	4.4577	1.44934	0		OK		8	5	3	4	1	7	9	6	1		0	0	0	0	0.5	0	0	0	0.5		8	5	3	4	1.5	7	9	6	1.5		4
GB19857	GB46039	FBgn0003884	alpha-Tubulin at 84B	Immune system process (GO:0002376)	Immune syst		179.008	343.03	152.189	661.915	71.431	55.185	26.0286	21.4926	193.493		OK		6	8	5	9	4	3	2	1	7		0	0	0	0	0	0	0	0	0		6	8	5	9	4	3	2	1	7		4
GB19881	GB42786	FBgn0027066	Eb1	Immune system process (GO:0002376)	Immune syst		5.98649	3.07785	2.98596	2.79982	3.66154	2.58656	10.5626	4.43588	5.24512		OK		8	4	3	2	5	1	9	6	7		0	0	0	0	0	0	0	0	0		8	4	3	2	5	1	9	6	7		4
GB19884	GB46165	FBgn0010389	heartless	Immune system process (GO:0002376)	Immune syst		2.58484	1.8808	1.49198	0.97689	2.71481	1.98315	3.1326	1.72404	1.94446		OK		7	4	2	1	8	6	9	3	5		0	0	0	0	0	0	0	0	0		7	4	2	1	8	6	9	3	5		4
GB19895	GB50933	FBgn0003117	pannier	Immune system process (GO:0002376)	Immune syst		11.2353	18.2101	11.7523	6.5683	4.63581	30.143	7.02088	22.7818	15.7718		OK		4	7	5	2	1	9	3	8	6		0	0	0	0	0	0	0	0	0		4	7	5	2	1	9	3	8	6		4
GB19906	GB45031	FBgn0014179	glial cells missing	Immune system process (GO:0002376)	Immune syst		1.38152	0.939894	0.66023	1.376	7.64792	1.00364	13.8129	1.14354	3.69155		OK		6	2	1	5	8	3	9	4	7		0	0	0	0	0	0	0	0	0		6	2	1	5	8	3	9	4	7		4
GB19961	GB42981	FBgn0040323	Gram-negative bacteria binding protein 1	Immune system process (GO:0002376)	Immune syst		2.17691	2.83366	0.985591	3.617	7.44574	3.44276	12.0283	1.4355	3.55531		OK		3	4	1	7	8	5	9	2	6		0	0	0	0	0	0	0	0	0		3	4	1	7	8	5	9	2	6		4
GB19984	GB45510	FBgn0004009	wingless	Immune system process (GO:0002376)	Immune syst		2.15851	1.92965	1.4283	2.79557	1.72644	1.53371	4.81432	2.00159	3.50357		OK		6	4	1	7	3	2	9	5	8		0	0	0	0	0	0	0	0	0		6	4	1	7	3	2	9	5	8		4
GB11057	GB47454	FBgn0015247	Iap2	Imd-Pathway_peptidoglycan recognition protein signaling pathway ; GO:0061057	Imd-Pathway		2.70008	2.89589	2.79272	2.52559	2.33957	2.97987	2.92458	4.60199	3.49105		OK		3	5	4	2	1	7	6	9	8		0	0	0	0	0	0	0	0	0		3	5	4	2	1	7	6	9	8		4
GB15371	GB47804	FBgn0037906	PGRP-LB	Imd-Pathway_peptidoglycan recognition protein signaling pathway ; GO:0061057	Imd-Pathway		0.905818	0.652507	0.222629	0.635462	0.784875	1.31051	1.81133	1.4723	1.96757		OK		5	3	1	2	4	6	8	7	9		0	0	0	0	0	0	0	0	0		5	3	1	2	4	6	8	7	9		4
GB15528	GB44455	FBgn0034647	pirk	Imd-Pathway_peptidoglycan recognition protein signaling pathway ; GO:0061057	Imd-Pathway		4.89318	1.92262	3.82655	2.19602	1.2848	1.07262	5.93011	0.803361	5.06128		OK		7	4	6	5	3	2	9	1	8		0	0	0	0	0	0	0	0	0		7	4	6	5	3	2	9	1	8		4
GB16425	GB45352	FBgn0020381	Dredd	Imd-Pathway_peptidoglycan recognition protein signaling pathway ; GO:0061057	Imd-Pathway		3.0756	2.90993	1.77696	2.79097	1.19326	2.29891	2.52432	2.17619	1.282		OK		9	8	3	7	1	5	6	4	2		0	0	0	0	0	0	0	0	0		9	8	3	7	1	5	6	4	2		4
GB17188	GB42500	FBgn0035976	PGRP-LC	Imd-Pathway_peptidoglycan recognition protein signaling pathway ; GO:0061057	Imd-Pathway		1.52675	1.4664	1.01026	1.46471	5.08808	2.15657	9.58949	1.32561	1.94363		OK		5	4	1	3	8	7	9	2	6		0	0	0	0	0	0	0	0	0		5	4	1	3	8	7	9	2	6		4
GB17514	GB48951	FBgn0034068	casp	Imd-Pathway_peptidoglycan recognition protein signaling pathway ; GO:0061057	Imd-Pathway		5.50916	3.84051	4.17127	2.7151	3.07973	3.38201	4.97517	6.0178	4.52198		OK		8	4	5	1	2	3	7	9	6		0	0	0	0	0	0	0	0	0		8	4	5	1	2	3	7	9	6		4
GB18606	GB45648	FBgn0013983	imd	Imd-Pathway_peptidoglycan recognition protein signaling pathway ; GO:0061057	Imd-Pathway		1.4075	1.6335	0.720691	1.18855	1.01631	1.30534	1.17272	0.794349	1.81982		OK		7	8	1	5	3	6	4	2	9		0	0	0	0	0	0	0	0	0		7	8	1	5	3	6	4	2	9		4
GB14664	GB48187	FBgn0026323	Tak1	Imd-Pathway	Imd-Pathway		11.302	12.7588	12.6712	14.7803	6.49773	6.82551	10.1755	12.624	12.7984		OK		4	7	6	9	1	2	3	5	8		0	0	0	0	0	0	0	0	0		4	7	6	9	1	2	3	5	8		4
GB17106	GB49918	not found	IKKgamma-kenny	Imd-Pathway	Imd-Pathway		91.6975	81.7744	79.0346	98.3006	220.908	107.567	285.063	89.5993	181.99		OK		4	2	1	5	8	6	9	3	7		0	0	0	0	0	0	0	0	0		4	2	1	5	8	6	9	3	7		4
GB18650	GB41606	FBgn0086358	Tab	Imd-Pathway	Imd-Pathway		30.4959	51.5848	14.5877	35.4797	6.55143	112.643	17.1353	150.614	45.9858		OK		4	7	2	5	1	8	3	9	6		0	0	0	0	0	0	0	0	0		4	7	2	5	1	8	3	9	6		4
GB19498	GB45752	FBgn0000173	dUbc13	Imd-Pathway	Imd-Pathway		2.50944	2.0128	1.77155	1.78959	1.3879	0.727896	3.06953	1.62718	2.73371		OK		7	6	4	5	2	1	9	3	8		0	0	0	0	0	0	0	0	0		7	6	4	5	2	1	9	3	8		4
GB30399	GB55968	not found		Imd-Pathway	Imd-Pathway		5.69573	7.18011	6.45256	4.43972	0	6.53684	5.33883	3.73684	1.65696		OK		6	9	7	4	1	8	5	3	2		0	0	0	0	0	0	0	0	0		6	9	7	4	1	8	5	3	2		4
GB10469	GB52343	FBgn0037107		IG Superfamily Genes	IG Superfam		6.65932	8.98197	6.63314	6.63046	4.05716	7.10717	4.29141	5.58461	7.50695		OK		6	9	5	4	1	7	2	3	8		0	0	0	0	0	0	0	0	0		6	9	5	4	1	7	2	3	8		4
GB10912	GB53701	not found		IG Superfamily Genes	IG Superfam		10.3855	6.96089	6.78723	9.24885	232.986	8.27147	90.8247	9.33326	19.6805		OK		6	2	1	4	9	3	8	5	7		0	0	0	0	0	0	0	0	0		6	2	1	4	9	3	8	5	7		4
GB11115	GB47239	FBgn0029082		IG Superfamily Genes	IG Superfam		0.963591	0.642707	0.41116	0.500734	4.4066	0.774495	9.36665	0.54382	2.82397		OK		6	4	1	2	8	5	9	3	7		0	0	0	0	0	0	0	0	0		6	4	1	2	8	5	9	3	7		4
GB11358	GB55483	FBgn0005666		IG Superfamily Genes	IG Superfam		104.791	81.593	99.8374	98.3312	34.7572	44.8532	32.9679	114.216	103.526		OK		8	4	6	5	2	3	1	9	7		0	0	0	0	0	0	0	0	0		8	4	6	5	2	3	1	9	7		4
GB11807	GB53012	FBgn0010473		IG Superfamily Genes	IG Superfam		35.3382	37.3649	44.5642	29.1144	16.841	19.0441	20.8153	8.54287	50.8474		OK		6	7	8	5	2	3	4	1	9		0	0	0	0	0	0	0	0	0		6	7	8	5	2	3	4	1	9		4
GB11846	GB44650	FBgn0002968	Neuroglian	IG Superfamily Genes	IG Superfam		11.1839	13.2775	11.3145	10.7549	8.96642	5.10115	4.90787	4.45646	3.70509		OK		7	9	8	6	5	4	3	2	1		0	0	0	0	0	0	0	0	0		7	9	8	6	5	4	3	2	1		4
GB11918	GB49767	not found		IG Superfamily Genes	IG Superfam		10.1665	4.31856	4.96065	5.11906	14.0101	4.71429	16.9413	5.31015	13.265		OK		6	1	3	4	8	2	9	5	7		0	0	0	0	0	0	0	0	0		6	1	3	4	8	2	9	5	7		4
GB12490	GB53013	FBgn0028482		IG Superfamily Genes	IG Superfam		9.15779	6.04438	7.62269	5.55594	3.12711	4.09173	6.31464	3.91064	9.65904		OK		8	5	7	4	1	3	6	2	9		0	0	0	0	0	0	0	0	0		8	5	7	4	1	3	6	2	9		4
GB12933	GB40916	not found		IG Superfamily Genes	IG Superfam		4.39844	4.38779	2.50604	3.78694	61.152	8.54402	67.6645	7.31162	24.3814		OK		4	3	1	2	8	6	9	5	7		0	0	0	0	0	0	0	0	0		4	3	1	2	8	6	9	5	7		4
GB13261	GB44117	FBgn0000547		IG Superfamily Genes	IG Superfam		5.00202	3.65921	2.42054	4.26261	950.37	6.6195	397.372	3.98435	9.16818		OK		5	2	1	4	9	6	8	3	7		0	0	0	0	0	0	0	0	0		5	2	1	4	9	6	8	3	7		4
GB14317	GB49171	FBgn0021764		IG Superfamily Genes	IG Superfam		4.4996	2.41042	2.25074	2.24273	7.57799	3.49121	14.5103	3.85421	5.74234		OK		6	3	2	1	8	4	9	5	7		0	0	0	0	0	0	0	0	0		6	3	2	1	8	4	9	5	7		4
GB14520	GB46360	FBgn0000635		IG Superfamily Genes	IG Superfam		16.5921	11.3294	9.95477	13.321	11.6984	8.12553	17.0511	6.25608	12.5684		OK		8	4	3	7	5	2	9	1	6		0	0	0	0	0	0	0	0	0		8	4	3	7	5	2	9	1	6		4
GB14642	GB47977	FBgn0086906		IG Superfamily Genes	IG Superfam		52.7385	34.3158	50.9701	39.9842	47.0208	39.0813	34.3017	118.731	62.3628		OK		7	2	6	4	5	3	1	9	8		0	0	0	0	0	0	0	0	0		7	2	6	4	5	3	1	9	8		4
GB15344	GB41645	FBgn0000464		IG Superfamily Genes	IG Superfam		25.7958	24.4016	23.1421	25.155	22.6858	19.2361	27.7772	17.2032	39.4499		OK		7	5	4	6	3	2	8	1	9		0	0	0	0	0	0	0	0	0		7	5	4	6	3	2	8	1	9		4
GB15987	GB45774	FBgn0259141		IG Superfamily Genes	IG Superfam		4.75071	4.31215	4.21814	4.09009	24.5501	5.52521	30.5106	4.27825	12.1653		OK		5	4	2	1	8	6	9	3	7		0	0	0	0	0	0	0	0	0		5	4	2	1	8	6	9	3	7		4
GB16060	GB46759	FBgn0037736		IG Superfamily Genes	IG Superfam		41.4433	106.617	33.1072	130.476	196.289	4577.68	317.387	1740.86	347.289		OK		2	3	1	4	5	9	6	8	7		0	0	0	0	0	0	0	0	0		2	3	1	4	5	9	6	8	7		4
GB30209	GB44159	not found		IG superfamily genes	IG superfam		42.038	44.5867	70.4433	47.0833	11.1423	20.1135	7.36358	32.0722	55.6103		OK		5	6	9	7	2	3	1	4	8		0	0	0	0	0	0	0	0	0		5	6	9	7	2	3	1	4	8		4
GB11717	GB49260	FBgn0061354	CTL1	C-lectin domain	C-lectin do		22.0137	2.59814	45.7597	5.06054	9.6989	8.65771	11.9376	50.5124	60.9001		OK		6	1	7	2	4	3	5	8	9		0	0	0	0	0	0	0	0	0		6	1	7	2	4	3	5	8	9		4
GB11792	GB55225	FBgn0001083	CTL6	C-lectin domain	C-lectin do		1.87	1.29825	1.09905	1.1566	6.34038	2.26208	8.23065	1.07372	3.46902		OK		5	4	2	3	8	6	9	1	7		0	0	0	0	0	0	0	0	0		5	4	2	3	8	6	9	1	7		4
GB11810	GB44210	FBgn0037240	CTL10	C-lectin domain	C-lectin do		1.02886	0.668478	0.656965	0.691901	5.06923	1.20114	9.27831	1.01102	3.81861		OK		5	2	1	3	8	6	9	4	7		0	0	0	0	0	0	0	0	0		5	2	1	3	8	6	9	4	7		4
GB13808	GB43983	FBgn0030617	CTL12	C-lectin domain	C-lectin do		2.84612	3.16522	2.40456	3.28396	13.953	6.25151	19.6573	3.6014	12.6665		OK		2	3	1	4	8	6	9	5	7		0	0	0	0	0	0	0	0	0		2	3	1	4	8	6	9	5	7		4
GB14265	GB45248	FBgn0032180	CTL2	C-lectin domain	C-lectin do		2.43415	1.94827	2.07559	1.85865	4.30438	1.78754	10.0992	2.0298	7.81024		OK		6	3	5	2	7	1	9	4	8		0	0	0	0	0	0	0	0	0		6	3	5	2	7	1	9	4	8		4
GB14382	GB51399	FBgn0013997	CTL8	C-lectin domain	C-lectin do		1.24473	1.17193	0.956018	0.625552	4.5412	1.0754	9.08825	1.58614	3.10014		OK		5	4	2	1	8	3	9	6	7		0	0	0	0	0	0	0	0	0		5	4	2	1	8	3	9	6	7		4
GB14975	GB52656	FBgn0031629	CTL7	C-lectin domain	C-lectin do		33.0042	59.0244	34.5557	65.5503	48.0438	34.8938	56.0976	44.7036	64.7257		OK		1	7	2	9	5	3	6	4	8		0	0	0	0	0	0	0	0	0		1	7	2	9	5	3	6	4	8		4
GB15050	GB47095	not found	CTL9	C-lectin domain	C-lectin do		3.26129	3.95666	5.69521	2.8097	1.48729	4.87114	6.00661	8.13724	7.98945		OK		3	4	6	2	1	5	7	9	8		0	0	0	0	0	0	0	0	0		3	4	6	2	1	5	7	9	8		4
GB17330	GB40445	FBgn0031918	CTL5	C-lectin domain	C-lectin do		260.317	255.966	251.761	286.415	43.7322	80.2189	31.9832	237.342	207.349		OK		8	7	6	9	2	3	1	5	4		0	0	0	0	0	0	0	0	0		8	7	6	9	2	3	1	5	4		4
GB18049	GB46626	FBgn0035199	CTL3	C-lectin domain	C-lectin do		6.28023	6.68406	5.52752	7.40914	141.19	10.0116	211.285	6.09247	75.845		OK		3	4	1	5	8	6	9	2	7		0	0	0	0	0	0	0	0	0		3	4	1	5	8	6	9	2	7		4
GB19013	GB43691	FBgn0038017	CTL11	C-lectin domain	C-lectin do		3.06853	47.9742	2.9329	55.9873	2.95425	7.01963	1.70445	2.38601	8.1112		OK		5	8	3	9	4	6	1	2	7		0	0	0	0	0	0	0	0	0		5	8	3	9	4	6	1	2	7		4
GB20122	GB47938	FBgn0031879	CTL4	C-lectin domain	C-lectin do		4.53638	3.52329	3.40184	5.09512	1.66378	1.48695	2.75976	2.04273	3.52537		OK		8	6	5	9	2	1	4	3	7		0	0	0	0	0	0	0	0	0		8	6	5	9	2	1	4	3	7		4
GB10036	GB47618	FBgn0010385	Defensin-2	Antimicrobial peptide - AMP	Antimicrobi		0.584586	0.280738	0.179597	0.227837	0	0.162646	2.92243	0.791811	0		OK		7	6	4	5	1	3	9	8	1		0	0	0	0	0.5	0	0	0	0.5		7	6	4	5	1.5	3	9	8	1.5		4
GB17538	GB51223	not found	Hymenoptaecin	Antimicrobial peptide - AMP	Antimicrobi		2.93066	5.6908	1.95731	120.08	26.4977	52.9643	107.652	1.63959	6.32628		OK		3	4	2	9	6	7	8	1	5		0	0	0	0	0	0	0	0	0		3	4	2	9	6	7	8	1	5		4
GB17782	GB47546	not found	Apidaecin	Antimicrobial peptide - AMP	Antimicrobi		18.3815	71.7478	19.3912	216.032	46.5452	65.8537	160.705	0.454747	0.781354		OK		3	7	4	9	5	6	8	1	2		0	0	0	0	0	0	0	0	0		3	7	4	9	5	6	8	1	2		4
GB18323	GB47318	not found	abaecin	Antimicrobial peptide - AMP	Antimicrobi		15.4385	20.0456	13.3508	279.012	29.7271	383.084	457.36	4.2597	1.77432		OK		4	5	3	7	6	8	9	2	1		0	0	0	0	0	0	0	0	0		4	5	3	7	6	8	9	2	1		4
GB19392	GB41428	FBgn0010385	Defensin-1	Antimicrobial peptide - AMP	Antimicrobi		16.1687	0.647061	0.910681	4.51614	4.66995	31.1147	111.141	0.0912507	1.67241		OK		7	2	3	5	6	8	9	1	4		0	0	0	0	0	0	0	0	0		7	2	3	5	6	8	9	1	4		4
GB19468	GB53576	not found	apisimin	Antimicrobial peptide - AMP	Antimicrobi		37.1443	10.4807	8.25891	7.77345	2.50466	2.81483	520.22	1.85976	21.9758		OK		8	6	5	4	2	3	9	1	7		0	0	0	0	0	0	0	0	0		8	6	5	4	2	3	9	1	7		4
GB10896	GB53625	FBgn0051997	Vago	Vago orthologue	Vago orthol		27.585	203.099	62.1311	256.561	17.6789	87.5566	12.2398	16.9683	128.65		OK		4	8	5	9	3	6	1	2	7		0	0	0	0	0	0	0	0	0		4	8	5	9	3	6	1	2	7		4
GB12654	GB48208	FBgn0262739	AGO1 argonaute 1	RNAi	RNAi		2.689	2.56298	2.08106	2.70404	17.6082	5.4369	12.6218	3.65611	5.15935		OK		3	2	1	4	9	7	8	5	6		0	0	0	0	0	0	0	0	0		3	2	1	4	9	7	8	5	6		4
GB19288	GB48923	FBgn0034246	Dicer-2	RNAi	RNAi		3.8283	2.68111	2.6463	2.24937	5.90553	3.58269	6.88686	5.1559	3.82482		OK		6	3	2	1	8	4	9	7	5		0	0	0	0	0	0	0	0	0		6	3	2	1	8	4	9	7	5		4
GB19389	GB49909	FBgn0250816	argonaute 3	RNAi	RNAi		0.389054	0.546139	0.753931	0.4199	3.11177	0.682772	4.93716	0.5067	0.928662		OK		1	4	6	2	8	5	9	3	7		0	0	0	0	0	0	0	0	0		1	4	6	2	8	5	9	3	7		4
[truncated: 15 more columns]

## Sheet: diff expr 1 vs 3 mites
Apis mellifera putative immune related genes extended list
The gene list has been adapted from: Ryabov EV, Wood GR, Fannon JM, Moore JD, Bull JC, Chandler D, Mead A, Burroughs N, Evans DJ. (2014) A virulent strain of deformed wing virus (DWV) of honeybees (Apis mellifera) prevails after Varroa destructor-mediated, or in vitro, transmission. PLoS Pathog. 2014 Jun 26;10(6):e1004230. doi: 10.1371/journal.ppat.1004230.
Note that double entries were excluded from the original list for the sake of the statistical analysis
The details of the statistical analysis are reported in columns Q to BH; if you are interested, use the command "format > unhide"
If you want to change the significance level go to the spreadsheet "reference parameters"
To see only the significantly differentially expressed genes, use the "filter" in column BK							sample code
Correction for multiple comparisons according to McDonald, J.H. 2014. Handbook of Biological Statistics (3rd ed.). Sparky House Publishing, Baltimore, Maryland
							7	8	9	10	11	12	13	14	15	16				ranks											correction for ties											corrected ranks
							one mite					three mites						filtering		group1					group2						group1					group2						group1					group2
Apis mellifera OGS1 (2008 version)	Apis mellifera OGS3.1 BEEBASE	FBgn ortholog	Gene Product	GO term / Pathway	Go term short name		H1	H2	H3	H4	H5	I1	I2	I3	I4	I5				1	2	3	4	5	1	2	3	4	5		1	2	3	4	5	1	2	3	4	5		1	2	3	4	5	1	2	3
GB10023	GB52350	FBgn0036448	myopic	Toll_pathway_Toll signaling pathway ; GO:0008063 and children	Toll_pathwa		0.797901	12.4557	1.81435	4.29356	2.4796	27.0297	1.93502	22.2417	1.59314	0.63475		OK		2	8	4	7	6	10	5	9	3	1		0	0	0	0	0	0	0	0	0	0		2	8	4	7	6	10	5	9
GB10539	GB54845	FBgn0026318	TNF-receptor-associated factor 6	Toll_pathway_Toll signaling pathway ; GO:0008063 and children	Toll_pathwa		0	0.388297	0.607577	1.2079	0.336481	1.02221	0.164114	1.4744	0.878854	0.549114		OK		1	4	6	9	3	8	2	10	7	5		0	0	0	0	0	0	0	0	0	0		1	4	6	9	3	8	2	10
GB10655	GB44055	FBgn0000250	cactus	Toll_pathway_Toll signaling pathway ; GO:0008063 and children	Toll_pathwa		0.969073	2.75979	2.39906	4.38793	6.37738	19.7777	1.96997	30.7391	0.820234	5.49282		OK		2	5	4	6	8	9	3	10	1	7		0	0	0	0	0	0	0	0	0	0		2	5	4	6	8	9	3	10
GB11090	GB47167	FBgn0026318	TNF-receptor-associated factor 6	Toll_pathway_Toll signaling pathway ; GO:0008063 and children	Toll_pathwa		0.215789	0	0.569828	0.254892	1.42009	0	0.415577	0	0.168597	0		OK		6	1	9	7	10	1	8	1	5	1		0	1.5	0	0	0	1.5	0	1.5	0	1.5		6	2.5	9	7	10	2.5	8	2.5
GB11883	GB53302	FBgn0000250	cactus	Toll_pathway_Toll signaling pathway ; GO:0008063 and children	Toll_pathwa		1.57862	5.28907	9.28743	4.49717	3.51384	6.03361	4.38144	5.08773	4.02663	4.65396		OK		1	8	10	5	2	9	4	7	3	6		0	0	0	0	0	0	0	0	0	0		1	8	10	5	2	9	4	7
GB12279	GB55279	FBgn0028990	Serpin 27A	Toll_pathway_Toll signaling pathway ; GO:0008063 and children	Toll_pathwa		0.113074	2.00368	1.39342	2.27059	6.13906	2.26062	0.810562	4.23884	1.00124	1.28183		OK		1	6	5	8	10	7	2	9	3	4		0	0	0	0	0	0	0	0	0	0		1	6	5	8	10	7	2	9
GB12344	GB51498	FBgn0033402	Myd88	Toll_pathway_Toll signaling pathway ; GO:0008063 and children	Toll_pathwa		0.497454	1.25928	2.57249	1.07726	0.954829	0.828775	2.02249	1.1954	1.26315	1.33561		OK		1	6	10	4	3	2	9	5	7	8		0	0	0	0	0	0	0	0	0	0		1	6	10	4	3	2	9	5
GB13429	GB47680	FBgn0022787	Helicase 89B	Toll_pathway_Toll signaling pathway ; GO:0008063 and children	Toll_pathwa		1.61656	1.58408	1.58358	2.74104	3.30305	1.95477	0.77831	4.5112	1.20191	1.44676		OK		6	5	4	8	9	7	1	10	2	3		0	0	0	0	0	0	0	0	0	0		6	5	4	8	9	7	1	10
GB13503	GB52103	FBgn0003495	spatzle	Toll_pathway_Toll signaling pathway ; GO:0008063 and children	Toll_pathwa		0.224972	2.56276	1.26241	1.06295	1.11039	0	0.794312	0.648738	0.527313	0.402683		OK		2	10	9	7	8	1	6	5	4	3		0	0	0	0	0	0	0	0	0	0		2	10	9	7	8	1	6	5
GB13520	GB44185	FBgn0000250	cactus	Toll_pathway_Toll signaling pathway ; GO:0008063 and children	Toll_pathwa		10.8557	18.1795	16.7404	14.9272	52.0233	13.6341	7.3262	16.3744	10.1997	15.6444		OK		3	9	8	5	10	4	1	7	2	6		0	0	0	0	0	0	0	0	0	0		3	9	8	5	10	4	1	7
GB13742	GB40654	FBgn0260632	dorsal	Toll_pathway_Toll signaling pathway ; GO:0008063 and children	Toll_pathwa		4.03544	17.8771	20.5254	7.72783	7.74574	2.44479	15.661	7.40521	18.8935	11.8197		OK		2	8	10	4	5	1	7	3	9	6		0	0	0	0	0	0	0	0	0	0		2	8	10	4	5	1	7	3
GB13922	GB41067	FBgn0010269	Downstream of raf1	Toll_pathway_Toll signaling pathway ; GO:0008063 and children	Toll_pathwa		0	0	0.418154	0.598549	0.416839	1.26633	1.30117	0	0.890788	1.81401		OK		1	1	5	6	4	8	9	1	7	10		1	1	0	0	0	0	0	1	0	0		2	2	5	6	4	8	9	2
GB13935	GB49466	FBgn0261988	G protein-coupled receptor kinase 2	Toll_pathway_Toll signaling pathway ; GO:0008063 and children	Toll_pathwa		1.01779	6.01175	3.11691	7.54726	10.6051	16.9567	2.06899	18.4248	1.7892	4.04837		OK		1	6	4	7	8	9	3	10	2	5		0	0	0	0	0	0	0	0	0	0		1	6	4	7	8	9	3	10
GB14810	GB53713	FBgn0022787	Helicase 89B	Toll_pathway_Toll signaling pathway ; GO:0008063 and children	Toll_pathwa		2.56833	5.59562	2.4877	2.93427	4.36403	5.47141	1.59468	7.77039	2.31915	4.89859		OK		4	9	3	5	6	8	1	10	2	7		0	0	0	0	0	0	0	0	0	0		4	9	3	5	6	8	1	10
GB15273	GB48707	FBgn0024222	immune response deficient 5	Toll_pathway_Toll signaling pathway ; GO:0008063 and children	Toll_pathwa		0.235057	1.33883	3.4333	2.63769	1.83693	0.88113	2.60294	2.03346	2.57111	1.57776		OK		1	3	10	9	5	2	8	6	7	4		0	0	0	0	0	0	0	0	0	0		1	3	10	9	5	2	8	6
GB15684	GB51427	FBgn0003882	tube	Toll_pathway_Toll signaling pathway ; GO:0008063 and children	Toll_pathwa		3.97755	10.6983	11.7069	10.9628	11.452	0.828342	6.11749	131.425	11.0063	142.688		OK		2	4	8	5	7	1	3	9	6	10		0	0	0	0	0	0	0	0	0	0		2	4	8	5	7	1	3	9
GB15688	GB52631	FBgn0003495	spatzle	Toll_pathway_Toll signaling pathway ; GO:0008063 and children	Toll_pathwa		6.46809	5.53474	3.75882	6.99453	5.54556	4.09794	3.07028	10.508	3.09618	3.26125		OK		8	6	4	9	7	5	1	10	2	3		0	0	0	0	0	0	0	0	0	0		8	6	4	9	7	5	1	10
GB15714	GB43157	FBgn0036448	myopic	Toll_pathway_Toll signaling pathway ; GO:0008063 and children	Toll_pathwa		1.27949	2.97456	1.78417	2.2516	2.19098	1.43562	1.60083	2.25894	0.907865	2.10325		OK		2	10	5	8	7	3	4	9	1	6		0	0	0	0	0	0	0	0	0	0		2	10	5	8	7	3	4	9
GB16281	GB45171	FBgn0010602	lesswright	Toll_pathway_Toll signaling pathway ; GO:0008063 and children	Toll_pathwa		4.55974	21.9935	65.3293	6.69612	5.67704	15.3987	22.9027	12.0826	18.3904	11.691		OK		1	8	10	3	2	6	9	5	7	4		0	0	0	0	0	0	0	0	0	0		1	8	10	3	2	6	9	5
GB16397	GB49344	FBgn0010441	pelle	Toll_pathway_Toll signaling pathway ; GO:0008063 and children	Toll_pathwa		0.976261	0.285156	2.3301	1.77411	2.96524	0.375343	0.482085	0.433106	0.792093	1.20977		OK		6	1	9	8	10	2	4	3	5	7		0	0	0	0	0	0	0	0	0	0		6	1	9	8	10	2	4	3
GB16970	GB44935	FBgn0025574	Pellino	Toll_pathway_Toll signaling pathway ; GO:0008063 and children	Toll_pathwa		16.56	8.46251	17.0321	11.6268	6.92583	3.71299	7.98793	3.83811	11.3785	14.6267		OK		9	5	10	7	3	1	4	2	6	8		0	0	0	0	0	0	0	0	0	0		9	5	10	7	3	1	4	2
GB17879	GB51741	FBgn0030310	Peptidoglycan recognition protein SA	Toll_pathway_Toll signaling pathway ; GO:0008063 and children	Toll_pathwa		2.68443	3.39774	9.08238	4.75631	11.0412	2.23617	6.46225	0.645078	2.27213	4.40453		OK		4	5	9	7	10	2	8	1	3	6		0	0	0	0	0	0	0	0	0	0		4	5	9	7	10	2	8	1
GB18520	GB50418	FBgn0262473	Toll	Toll_pathway_Toll signaling pathway ; GO:0008063 and children	Toll_pathwa		0.98118	46.4617	1.83845	58.5285	6.17219	156.352	4.3535	58.4183	0.83424	2.01452		OK		2	7	3	9	6	10	5	8	1	4		0	0	0	0	0	0	0	0	0	0		2	7	3	9	6	10	5	8
GB19537	GB44031	FBgn0260632	dorsal	Toll_pathway_Toll signaling pathway ; GO:0008063 and children	Toll_pathwa		1.44743	5.70752	1.56195	2.3673	5.03747	6.67791	0.696882	9.95308	0.630684	2.69045		OK		3	8	4	5	7	9	2	10	1	6		0	0	0	0	0	0	0	0	0	0		3	8	4	5	7	9	2	10
GB10640	GB48399	FBgn0029114	Toll / Tollo	Toll_pathway_Toll signaling pathway ;	Toll_pathwa		0.973816	0.643084	0.0698784	0.600146	0.835903	1.90457	0.10872	1.58721	0.363882	0.151571		OK		8	6	1	5	7	10	2	9	4	3		0	0	0	0	0	0	0	0	0	0		8	6	1	5	7	10	2	9
GB13677	GB46708	FBgn0031114	cactin	Toll_pathway_Toll signaling pathway ;	Toll_pathwa		3.4618	0.345921	5.98405	6.13366	5.84532	0.455326	2.86559	15.4993	2.84706	9.29456		OK		5	1	7	8	6	2	4	10	3	9		0	0	0	0	0	0	0	0	0	0		5	1	7	8	6	2	4	10
GB14044	GB55007	FBgn0030051	persephone-PSH Serine Protease Immune Response Integrator	Toll_pathway_Toll signaling pathway ;	Toll_pathwa		1.49379	1.41804	1.77652	2.0499	2.89131	3.07427	0.895476	3.54739	0.695111	1.76941		OK		4	3	6	7	8	9	2	10	1	5		0	0	0	0	0	0	0	0	0	0		4	3	6	7	8	9	2	10
GB14609	GB48662	FBgn0004364	Toll	Toll_pathway_Toll signaling pathway ;	Toll_pathwa		0.418759	1.19257	1.3477	1.73125	1.89462	0.52325	0.772863	2.11321	1.10422	0.562162		OK		1	6	7	8	9	2	4	10	5	3		0	0	0	0	0	0	0	0	0	0		1	6	7	8	9	2	4	10
GB14720	GB42451	FBgn0086657	Mik2	Toll_pathway_Toll signaling pathway ;	Toll_pathwa		1.76358	3.34831	3.22112	3.61081	5.8997	4.40728	1.05666	6.95025	1.46975	3.47236		OK		3	5	4	7	9	8	1	10	2	6		0	0	0	0	0	0	0	0	0	0		3	5	4	7	9	8	1	10
GB15177	GB43456	FBgn0034476	Toll	Toll_pathway_Toll signaling pathway ;	Toll_pathwa		3.2177	6.63501	3.65057	6.64507	6.24043	6.07084	1.76465	11.3679	1.16543	4.08121		OK		3	8	4	9	7	6	2	10	1	5		0	0	0	0	0	0	0	0	0	0		3	8	4	9	7	6	2	10
GB15606	GB43914	FBgn0024846	0	Toll_pathway_Toll signaling pathway ;	Toll_pathwa		2.67996	101.762	5.0396	54.7744	12.4258	43.0254	5.50006	22.2474	6.12296	6.68665		OK		1	10	2	9	6	8	3	7	4	5		0	0	0	0	0	0	0	0	0	0		1	10	2	9	6	8	3	7
GB16299	GB48426	FBgn0029114	Toll	Toll_pathway_Toll signaling pathway ;	Toll_pathwa		3.6595	1.0689	0.398222	0.807525	1.52171	1.40696	0.451771	2.43523	0.361324	1.36763		OK		10	5	2	4	8	7	3	9	1	6		0	0	0	0	0	0	0	0	0	0		10	5	2	4	8	7	3	9
GB16472	GB48820	FBgn0028985	NEC LIKE	Toll_pathway_Toll signaling pathway ;	Toll_pathwa		7.37954	30.5307	10.7978	20.6861	16.1276	19.2676	11.9139	26.9969	7.18555	6.90015		OK		3	10	4	8	6	7	5	9	2	1		0	0	0	0	0	0	0	0	0	0		3	10	4	8	6	7	5	9
GB17012	GB46970	not found	NEC LIKE	Toll_pathway_Toll signaling pathway ;	Toll_pathwa		0.134639	2.55623	2.35544	1.11326	1.55058	0	4.06228	0.776503	0.683761	0.240995		OK		2	9	8	6	7	1	10	5	4	3		0	0	0	0	0	0	0	0	0	0		2	9	8	6	7	1	10	5
GB17781	GB48396	FBgn0036494	Toll	Toll_pathway_Toll signaling pathway ;	Toll_pathwa		1.04117	0.823644	0.186156	2.30595	3.56867	5.4207	0.264566	33.2762	0.101684	2.95074		OK		5	4	2	6	8	9	3	10	1	7		0	0	0	0	0	0	0	0	0	0		5	4	2	6	8	9	3	10
GB17927	GB49441	FBgn0003450	Toll-Pathway_persephone-Serine protease--Extracellular-cSP10	Toll_pathway_Toll signaling pathway ;	Toll_pathwa		16.7236	11.2666	5.65376	12.1074	12.4258	6.74085	6.32023	3.5002	3.05581	4.10388		OK		10	7	4	8	9	6	5	2	1	3		0	0	0	0	0	0	0	0	0	0		10	7	4	8	9	6	5	2
GB17936	GB55933	FBgn0039532		Toll_pathway_Toll signaling pathway ;	Toll_pathwa		1.62293	0	0.584405	2.0913	2.18462	0	2.84138	1.7018	0.979821	0.528171		OK		6	1	4	8	9	1	10	7	5	3		0	0.5	0	0	0	0.5	0	0	0	0		6	1.5	4	8	9	1.5	10	7
GB17961	GB41158	not found	Tollip	Toll_pathway_Toll signaling pathway ;	Toll_pathwa		4.31513	7.64644	8.45117	4.75727	2.36645	0.958553	3.97047	0	4.64507	3.08951		OK		6	9	10	8	3	2	5	1	7	4		0	0	0	0	0	0	0	0	0	0		6	9	10	8	3	2	5	1
GB17975	GB40699	FBgn0029114	Tollo	Toll_pathway_Toll signaling pathway ;	Toll_pathwa		4.03496	0	0.25613	0.183313	1.0213	0	0.249061	0	0.66688	0		OK		10	1	7	5	9	1	6	1	8	1		0	1.5	0	0	0	1.5	0	1.5	0	1.5		10	2.5	7	5	9	2.5	6	2.5
GB18032	GB42472	not found	dorsal	Toll_pathway_Toll signaling pathway ;	Toll_pathwa		0.121816	0.462556	0.924821	1.29502	3.20665	3.6531	2.4242	8.07933	0.808992	2.39847		OK		1	2	4	5	8	9	7	10	3	6		0	0	0	0	0	0	0	0	0	0		1	2	4	5	8	9	7	10
GB19066	GB44032	not found	dorsal	Toll_pathway_Toll signaling pathway ;	Toll_pathwa		92.8822	44.2997	44.4529	53.8375	34.6234	5.81231	16.7727	8.65393	19.7836	23.7696		OK		10	7	8	9	6	1	3	2	4	5		0	0	0	0	0	0	0	0	0	0		10	7	8	9	6	1	3	2
GB19582	GB54611	FBgn0028984	NEC-like	Toll_pathway_Toll signaling pathway ;	Toll_pathwa		17.6996	20.215	39.0935	11.9235	10.4649	11.4036	9.32059	8.77238	5.18578	6.68272		OK		8	9	10	7	5	6	4	3	1	2		0	0	0	0	0	0	0	0	0	0		8	9	10	7	5	6	4	3
GB11563	GB45417	FBgn0041182	TEPB	TEP - Thioester-containing protein	TEP - Thioe		1.34112	3.75233	2.80753	2.20946	2.26451	1.41117	1.44999	2.44251	1.46143	1.95831		OK		1	10	9	6	7	2	3	8	4	5		0	0	0	0	0	0	0	0	0	0		1	10	9	6	7	2	3	8
GB12605	GB42455	FBgn0041182	TEP7	TEP - Thioester-containing protein	TEP - Thioe		7.30155	4.6695	8.89969	7.78943	15.2498	6.91463	4.58854	13.2536	2.2999	6.9611		OK		6	3	8	7	10	4	2	9	1	5		0	0	0	0	0	0	0	0	0	0		6	3	8	7	10	4	2	9
GB18789	GB48204	FBgn0020240	TEPA	TEP - Thioester-containing protein	TEP - Thioe		0.347679	0.360053	0.845075	1.12004	2.44405	2.36964	0.537691	3.64576	0.814928	2.31956		OK		1	2	5	6	9	8	3	10	4	7		0	0	0	0	0	0	0	0	0	0		1	2	5	6	9	8	3	10
GB10222	GB41097	not found	SP18	serine proteases	serine prot		0.443443	1.12255	0.780659	1.5714	4.1342	1.47758	0.80656	5.96742	0.461951	1.85204		OK		1	5	3	7	9	6	4	10	2	8		0	0	0	0	0	0	0	0	0	0		1	5	3	7	9	6	4	10
GB10646	GB41409	FBgn0036436	SP4	serine proteases	serine prot		0.577796	0.365664	3.81442	2.27499	3.01025	2.88788	1.73094	3.61001	1.09096	2.41317		OK		2	1	10	5	8	7	4	9	3	6		0	0	0	0	0	0	0	0	0	0		2	1	10	5	8	7	4	9
GB10758	GB44146	FBgn0034709	0	serine proteases	serine prot		247.511	48.6202	32.7355	18.4064	40.9397	19.9237	9.80941	9.7533	23.972	31.5676		OK		10	9	7	3	8	4	2	1	5	6		0	0	0	0	0	0	0	0	0	0		10	9	7	3	8	4	2	1
GB10943	GB49946	FBgn0011653	cSPH41	serine proteases	serine prot		0.850714	8.68142	2.10605	5.02436	4.54875	5.58069	1.55301	11.1925	1.26702	2.28408		OK		1	9	4	7	6	8	3	10	2	5		0	0	0	0	0	0	0	0	0	0		1	9	4	7	6	8	3	10
GB11297	GB47402	not found	SP31	serine proteases	serine prot		0.15657	1.18904	0.155043	1.10965	3.09111	1.5651	0.0502548	7.22385	0.305821	2.52224		OK		3	6	2	5	9	7	1	10	4	8		0	0	0	0	0	0	0	0	0	0		3	6	2	5	9	7	1	10
GB11298	GB52598	FBgn0032213	cSPH42	serine proteases	serine prot		731.687	287.481	96.9969	300.824	396.056	85.5149	88.2518	230.407	13.3677	136.28		OK		10	7	4	8	9	2	3	6	1	5		0	0	0	0	0	0	0	0	0	0		10	7	4	8	9	2	3	6
GB11511	GB40138	not found	SP32	serine proteases	serine prot		0.20334	0.772114	0.939668	0.960747	1.00362	0	0.195801	0.586359	0.873784	0		OK		4	6	8	9	10	1	3	5	7	1		0	0	0	0	0	0.5	0	0	0	0.5		4	6	8	9	10	1.5	3	5
GB11552	GB48510	not found	SP34	serine proteases	serine prot		0.141485	10.7448	1.77468	11.1973	22.812	15.5575	2.86103	24.8876	0.829071	6.33122		OK		1	6	3	7	9	8	4	10	2	5		0	0	0	0	0	0	0	0	0	0		1	6	3	7	9	8	4	10
GB11588	GB50026	not found	SP27	serine proteases	serine prot		47.1452	2.67191	8.68677	6.81559	20.3752	4.92375	3.162	6.08731	0.714703	6.04561		OK		10	2	8	7	9	4	3	6	1	5		0	0	0	0	0	0	0	0	0	0		10	2	8	7	9	4	3	6
GB11698	GB49552	not found	cSP3	serine proteases	serine prot		11.0353	6.57297	5.321	6.77307	5.51785	1.62222	4.0282	5.92759	1.77509	7.93968		OK		10	7	4	8	5	1	3	6	2	9		0	0	0	0	0	0	0	0	0	0		10	7	4	8	5	1	3	6
GB12253	GB50586	FBgn0003319	SP16	serine proteases	serine prot		3.75946	4.87039	2.87605	4.44071	6.84006	10.3898	3.36454	9.69307	7.03218	10.2125		OK		3	5	1	4	6	10	2	8	7	9		0	0	0	0	0	0	0	0	0	0		3	5	1	4	6	10	2	8
GB12300	GB41399	FBgn0042098	SP5	serine proteases	serine prot		1.45213	5.51397	3.72808	6.86108	5.30907	1.61287	3.1591	3.25689	5.10549	7.22004		OK		1	8	5	9	7	2	3	4	6	10		0	0	0	0	0	0	0	0	0	0		1	8	5	9	7	2	3	4
GB12379	GB54517	not found	SP48	serine proteases	serine prot		0.824993	0	0.476554	0.730867	1.01798	0	0.397203	1.18949	0.563998	0		OK		8	1	5	7	9	1	4	10	6	1		0	1	0	0	0	1	0	0	0	1		8	2	5	7	9	2	4	10
GB13019	GB54775	FBgn0030027	SPH56	serine proteases	serine prot		3.55188	5.18733	3.26924	6.77736	9.77686	13.9973	1.66624	25.9998	4.48284	8.80285		OK		3	5	2	6	8	9	1	10	4	7		0	0	0	0	0	0	0	0	0	0		3	5	2	6	8	9	1	10
GB13263	GB52185	not found	SP40	serine proteases	serine prot		5.00331	10.9241	8.58786	12.4109	15.0226	6.25176	1.36504	15.1492	0.732956	3.13445		OK		4	7	6	8	9	5	2	10	1	3		0	0	0	0	0	0	0	0	0	0		4	7	6	8	9	5	2	10
GB13397	GB41410	not found	SPH51	serine proteases	serine prot		1.65213	5.1328	3.32163	5.32232	13.0965	17.2658	1.92834	27.2857	1.76021	15.5925		OK		1	5	4	6	7	9	3	10	2	8		0	0	0	0	0	0	0	0	0	0		1	5	4	6	7	9	3	10
GB13489	GB44120	FBgn0050375	SP28	serine proteases	serine prot		2.96089	0.749531	2.47593	1.98188	6.00798	1.47988	6.08237	3.69986	4.31825	2.47323		OK		6	1	5	3	9	2	10	7	8	4		0	0	0	0	0	0	0	0	0	0		6	1	5	3	9	2	10	7
GB13791	GB48079	FBgn0015316	SP22	serine proteases	serine prot		0.569497	0	1.50385	4.03617	6.55866	17.79	1.18816	29.9706	0.611806	10.9581		OK		2	1	5	6	7	9	4	10	3	8		0	0	0	0	0	0	0	0	0	0		2	1	5	6	7	9	4	10
GB14001	GB53354	FBgn0032402	cSPH50	serine proteases	serine prot		1.65405	0.697855	1.00095	1.19398	1.81419	0	0.766867	1.32491	0.574361	1.31584		OK		9	3	5	6	10	1	4	8	2	7		0	0	0	0	0	0	0	0	0	0		9	3	5	6	10	1	4	8
GB14077	GB54762	FBgn0033362	cSP6	serine proteases	serine prot		1.81539	4.36579	2.17721	4.64612	3.18585	7.25882	1.55385	7.15443	1.20562	1.40809		OK		4	7	5	8	6	10	3	9	1	2		0	0	0	0	0	0	0	0	0	0		4	7	5	8	6	10	3	9
GB14233	GB51631	not found	SP24	serine proteases	serine prot		202.096	484.455	12.1973	506.175	1280.19	2204.12	52.5189	2395.99	32.7915	869.912		OK		4	5	1	6	8	9	3	10	2	7		0	0	0	0	0	0	0	0	0	0		4	5	1	6	8	9	3	10
GB14247	GB45700	FBgn0000533	cSP2	serine proteases	serine prot		13.9269	1.54028	3.79369	9.10376	22.6905	2.02743	4.557	5.06878	0.475391	10.4069		OK		9	2	4	7	10	3	5	6	1	8		0	0	0	0	0	0	0	0	0	0		9	2	4	7	10	3	5	6
GB14309	GB50650	not found	cSP33	serine proteases	serine prot		0.926386	0.293136	0.802685	0.91188	4.19131	0.578771	0.545135	4.11836	0.55792	1.38181		OK		7	1	5	6	10	4	2	9	3	8		0	0	0	0	0	0	0	0	0	0		7	1	5	6	10	4	2	9
GB14366	GB52597	not found	cSPH39	serine proteases	serine prot		3.59275	1.98949	1.48239	3.35967	2.58601	2.99282	1.03306	2.80589	2.01755	1.20577		OK		10	4	3	9	6	8	1	7	5	2		0	0	0	0	0	0	0	0	0	0		10	4	3	9	6	8	1	7
GB14603	GB40137	FBgn0026250	SP17	serine proteases	serine prot		64.7978	46.0966	61.9284	16.2019	33.4606	0.787995	1.97358	49.5549	0.554307	2.53979		OK		10	7	9	5	6	2	3	8	1	4		0	0	0	0	0	0	0	0	0	0		10	7	9	5	6	2	3	8
GB14644	GB41407	not found	SP29	serine proteases	serine prot		29.0213	21.3563	34.6792	7.17494	19.8019	4.49772	5.95734	2.91932	9.18403	13.8926		OK		9	8	10	4	7	2	3	1	5	6		0	0	0	0	0	0	0	0	0	0		9	8	10	4	7	2	3	1
GB14654	GB41408	FBgn0039272	SP11	serine proteases	serine prot		0.768683	4.37822	1.48009	4.69121	7.37717	8.32424	1.48037	5.91095	1.40134	1.14657		OK		1	6	4	7	9	10	5	8	3	2		0	0	0	0	0	0	0	0	0	0		1	6	4	7	9	10	5	8
GB14774	GB48081	not found	SP47	serine proteases	serine prot		0.253884	5.09563	0.718311	1.84218	1.96914	6.70724	0.942959	5.12478	0.609249	0.649192		OK		1	8	4	6	7	10	5	9	2	3		0	0	0	0	0	0	0	0	0	0		1	8	4	6	7	10	5	9
GB15254	GB50290	not found	cSPH55	serine proteases	serine prot		5.33126	16.2482	3.12589	7.37451	7.73244	12.9725	2.20655	24.2739	2.08266	9.66814		OK		4	9	3	5	6	8	2	10	1	7		0	0	0	0	0	0	0	0	0	0		4	9	3	5	6	8	2	10
GB15317	GB52191	FBgn0051217	SP49	serine proteases	serine prot		0.883429	8.27449	4.0436	3.89579	6.49203	3.82674	2.24956	8.49165	3.40511	3.90048		OK		1	9	7	5	8	4	2	10	3	6		0	0	0	0	0	0	0	0	0	0		1	9	7	5	8	4	2	10
GB15453	GB47933	not found	SP44	serine proteases	serine prot		3.61675	5.65492	0.948041	5.52865	12.9508	10.1018	1.02431	23.9263	0.249333	3.80807		OK		4	7	2	6	9	8	3	10	1	5		0	0	0	0	0	0	0	0	0	0		4	7	2	6	9	8	3	10
GB15640	GB50164	not found	SP13	serine proteases	serine prot		2.24552	1.34631	0.936267	2.51283	3.6944	1.77211	1.47945	3.74885	1.38508	3.80779		OK		6	2	1	7	8	5	4	9	3	10		0	0	0	0	0	0	0	0	0	0		6	2	1	7	8	5	4	9
GB15702	GB48471	not found	SPH53	serine proteases	serine prot		0.869408	1.88645	10.4952	3.8144	1.83905	0.62077	3.30883	1.43261	2.03781	1.55618		OK		2	6	10	9	5	1	8	3	7	4		0	0	0	0	0	0	0	0	0	0		2	6	10	9	5	1	8	3
GB15980	GB42804	not found	SPH54	serine proteases	serine prot		3.34945	2.79363	1.8661	3.86492	5.47874	3.29011	0.969442	4.68973	1.06644	1.73274		OK		7	5	4	8	10	6	1	9	2	3		0	0	0	0	0	0	0	0	0	0		7	5	4	8	10	6	1	9
GB16021	GB45565	FBgn0038481	SP35	serine proteases	serine prot		23.7083	233.486	105.919	124.598	166.034	105.19	150.527	204.368	150.02	84.6456		OK		1	10	4	5	8	3	7	9	6	2		0	0	0	0	0	0	0	0	0	0		1	10	4	5	8	3	7	9
GB16038	GB48080	not found	SPH57	serine proteases	serine prot		1.00021	4.34053	3.3487	5.23218	4.46656	4.28499	3.25629	3.70833	2.17695	2.81334		OK		1	8	5	10	9	7	4	6	2	3		0	0	0	0	0	0	0	0	0	0		1	8	5	10	9	7	4	6
GB16147	GB45701	FBgn0027930	cSP1	serine proteases	serine prot		1.40982	1.48703	0.775599	2.77549	3.22149	0.782937	0.854754	0.677571	0.85672	0.560774		OK		7	8	3	9	10	4	5	2	6	1		0	0	0	0	0	0	0	0	0	0		7	8	3	9	10	4	5	2
GB16214	GB56027	FBgn0036287	SP38	serine proteases	serine prot		24.641	15.5943	11.4367	7.65234	5.99536	5.49298	2.91487	3.66956	5.42313	10.457		OK		10	9	8	6	5	4	1	2	3	7		0	0	0	0	0	0	0	0	0	0		10	9	8	6	5	4	1	2
GB16220	GB44149	FBgn0038727	cSP21	serine proteases	serine prot		1.19321	8.01604	2.75701	6.07139	16.3088	41.7464	4.68426	57.6994	2.6892	14.1289		OK		1	6	3	5	8	9	4	10	2	7		0	0	0	0	0	0	0	0	0	0		1	6	3	5	8	9	4	10
GB16367	GB40831	FBgn0038211	SP46	serine proteases	serine prot		6.23185	7.66559	2.86826	3.93975	4.04336	1.75478	2.33834	4.04967	3.73744	4.24188		OK		9	10	3	5	6	1	2	7	4	8		0	0	0	0	0	0	0	0	0	0		9	10	3	5	6	1	2	7
GB17145	GB46726	FBgn0051728	cSP7	serine proteases	serine prot		0.765796	0.323095	1.4324	2.01015	1.53989	0.425281	1.09245	2.20828	0.465359	1.97993		OK		4	1	6	9	7	2	5	10	3	8		0	0	0	0	0	0	0	0	0	0		4	1	6	9	7	2	5	10
GB17345	GB41710	FBgn0036612	SPH19	serine proteases	serine prot		2.97162	9.43119	1.87393	2.72427	2.69989	7.3154	0.711803	6.52275	0.415834	3.09614		OK		6	10	3	5	4	9	2	8	1	7		0	0	0	0	0	0	0	0	0	0		6	10	3	5	4	9	2	8
GB17654	GB43369	not found	SP45	serine proteases	serine prot		12.2938	18.3432	15.2867	22.0387	32.5046	18.2169	10.4453	21.5209	9.52611	11.8051		OK		4	7	5	9	10	6	2	8	1	3		0	0	0	0	0	0	0	0	0	0		4	7	5	9	10	6	2	8
GB18178	GB41178	FBgn0038447	SP15	serine proteases	serine prot		1.44801	0.366554	0.477963	0.51312	1.03233	0.241243	0.63519	0.417553	0.471388	1.03673		OK		10	2	5	6	8	1	7	3	4	9		0	0	0	0	0	0	0	0	0	0		10	2	5	6	8	1	7	3
GB18450	GB52706	FBgn0033365	cSP26	serine proteases	serine prot		3.75714	3.0571	2.12601	4.27947	7.94744	2.01199	1.76585	3.0955	2.93546	3.12233		OK		8	5	3	9	10	2	1	6	4	7		0	0	0	0	0	0	0	0	0	0		8	5	3	9	10	2	1	6
GB18530	GB50314	not found	SP43	serine proteases	serine prot		3.01285	0.817162	0	5.08401	4.60276	18.2853	0.690748	21.72	0.168139	7.70399		OK		5	4	1	7	6	9	3	10	2	8		0	0	0	0	0	0	0	0	0	0		5	4	1	7	6	9	3	10
GB18944	GB46203	FBgn0037627	SPH37	serine proteases	serine prot		8.8492	2.58476	1.79752	3.05542	6.04756	0.680449	3.01516	1.17775	2.18054	3.41158		OK		10	5	3	7	9	1	6	2	4	8		0	0	0	0	0	0	0	0	0	0		10	5	3	7	9	1	6	2
GB19292	GB45336	not found	SPH52	serine proteases	serine prot		27.5431	14.689	31.4117	44.7802	25.2031	15.4678	16.5886	21.4178	6.2866	26.8659		OK		8	2	9	10	6	3	4	5	1	7		0	0	0	0	0	0	0	0	0	0		8	2	9	10	6	3	4	5
GB19590	GB40567	FBgn0002926	SP20	serine proteases	serine prot		3.09341	0.927329	1.05691	2.7565	4.06255	1.62749	1.35871	3.28642	2.95751	4.80843		OK		7	1	2	5	9	4	3	8	6	10		0	0	0	0	0	0	0	0	0	0		7	1	2	5	9	4	3	8
GB19719	GB50648	FBgn0085379	cSP25	serine proteases	serine prot		2.0212	4.81558	1.43899	3.97911	4.10777	10.1022	1.03037	11.9997	1.22308	5.81687		OK		4	7	3	5	6	9	1	10	2	8		0	0	0	0	0	0	0	0	0	0		4	7	3	5	6	9	1	10
GB19846	GB50761	FBgn0038485	SP36	serine proteases	serine prot		1.71381	0	1.59424	7.36132	3.33225	2.33612	0.550088	17.0724	1.27814	3.06759		OK		5	1	4	9	8	6	2	10	3	7		0	0	0	0	0	0	0	0	0	0		5	1	4	9	8	6	2	10
GB19856	GB40926	FBgn0051265	SP12	serine proteases	serine prot		24.8505	9.43615	7.33423	8.2881	7.21496	0.730621	3.23748	2.95071	6.11027	9.1578		OK		10	9	6	7	5	1	3	2	4	8		0	0	0	0	0	0	0	0	0	0		10	9	6	7	5	1	3	2
GB10506	GB52097	FBgn0058006	AmSCR-B1	Scav. Receptor A	Scav. Recep		5.93478	9.79797	7.80751	25.0946	11.7452	11.6071	8.08898	13.3934	5.98088	10.4689		OK		1	5	3	10	8	7	4	9	2	6		0	0	0	0	0	0	0	0	0	0		1	5	3	10	8	7	4	9
GB11743	GB45986	FBgn0035290	AmSCR-B2	Scav. Receptor A	Scav. Recep		24.1479	12.7219	17.1728	16.1286	23.5044	21.1688	6.26968	22.4214	4.49445	15.162		OK		10	3	6	5	9	7	2	8	1	4		0	0	0	0	0	0	0	0	0	0		10	3	6	5	9	7	2	8
GB12378	GB50865	not found	AmSCR-B3	Scav. Receptor A	Scav. Recep		26.0446	3.80368	11.0217	4.33853	9.33894	5.00667	16.0763	1.92573	21.914	23.309		OK		10	2	6	3	5	4	7	1	8	9		0	0	0	0	0	0	0	0	0	0		10	2	6	3	5	4	7	1
GB12538	GB50482	FBgn0023479	GRAAL/Tequila-like	Scav. Receptor A	Scav. Recep		3.19715	31.5487	5.01784	18.9667	16.0984	41.5776	1.96416	24.1056	1.35239	4.37402		OK		3	9	5	7	6	10	2	8	1	4		0	0	0	0	0	0	0	0	0	0		3	9	5	7	6	10	2	8
GB12830	GB50454	not found	AmSCR-B4	Scav. Receptor A	Scav. Recep		32.563	16.3123	13.8681	28.0105	36.4695	11.1651	39.2704	17.0953	24.2332	70.5885		OK		7	3	2	6	8	1	9	4	5	10		0	0	0	0	0	0	0	0	0	0		7	3	2	6	8	1	9	4
GB13360	GB49476	FBgn0034660	lox2-like	Scav. Receptor A	Scav. Recep		2.58595	13.7061	5.92171	18.7728	54.6877	42.275	3.95991	128.477	2.6097	8.38947		OK		1	6	4	7	9	8	3	10	2	5		0	0	0	0	0	0	0	0	0	0		1	6	4	7	9	8	3	10
GB13813	GB49363	FBgn0027562	AmSCR-B5	Scav. Receptor A	Scav. Recep		2.10962	7.64644	6.42542	6.56956	10.5702	6.2306	2.83165	14.1024	2.7346	5.49247		OK		1	8	6	7	9	5	3	10	2	4		0	0	0	0	0	0	0	0	0	0		1	8	6	7	9	5	3	10
GB14314	GB53014	not found	AmSCR-B6	Scav. Receptor A	Scav. Recep		7.42011	3.87411	1.04094	5.14927	8.08764	11.1259	1.13129	10.431	1.41311	2.6563		OK		7	5	1	6	8	10	2	9	3	4		0	0	0	0	0	0	0	0	0	0		7	5	1	6	8	10	2	9
GB15549	GB48343	not found	AmSCR-B7	Scav. Receptor A	Scav. Recep		0.670837	2.18338	3.32148	5.99959	17.1858	3.35291	0.799765	4.69796	0.898503	3.08765		OK		1	4	6	9	10	7	2	8	3	5		0	0	0	0	0	0	0	0	0	0		1	4	6	9	10	7	2	8
GB16388	GB40306	not found	AmSCR-B8	Scav. Receptor A	Scav. Recep		122.902	95.1605	87.3682	165.854	189.21	101.235	54.5444	144.534	79.1254	189.876		OK		6	4	3	8	9	5	1	7	2	10		0	0	0	0	0	0	0	0	0	0		6	4	3	8	9	5	1	7
GB19649	GB54246	FBgn0033192	Corin-like	Scav. Receptor A	Scav. Recep		45.408	58.8756	43.1984	126.133	383.098	62.7352	18.2481	148.373	38.4338	37.0868		OK		5	6	4	8	10	7	1	9	3	2		0	0	0	0	0	0	0	0	0	0		5	6	4	8	10	7	1	9
GB19683	GB50866	FBgn0010435	AmSCR-B10	Scav. Receptor A	Scav. Recep		14.6299	18.6905	7.31136	15.5045	16.4213	21.1849	6.14409	13.7997	7.47784	13.9499		OK		6	9	2	7	8	10	1	4	3	5		0	0	0	0	0	0	0	0	0	0		6	9	2	7	8	10	1	4
GB19916	GB44045	FBgn0015924	AmSCR-B9	Scav. Receptor A	Scav. Recep		1.2512	5.65598	8.16171	5.13758	5.39134	7.7426	3.05984	7.21605	2.90943	8.1051		OK		1	6	10	4	5	8	3	7	2	9		0	0	0	0	0	0	0	0	0	0		1	6	10	4	5	8	3	7
GB19925	GB54506	FBgn0014033	AmSCR-C	Scav. Receptor A	Scav. Recep		2.9321	10.1028	5.21558	10.5186	13.4892	2.1711	3.1371	5.48018	2.12117	3.01289		OK		3	8	6	9	10	2	5	7	1	4		0	0	0	0	0	0	0	0	0	0		3	8	6	9	10	2	5	7
GB18313	GB43738	FBgn0033367	PPO	PPO - melanization	PPO - melan		1.51314	0.783498	2.11137	4.22462	3.73419	1.0313	1.78819	1.98335	2.49879	5.17062		OK		3	1	6	9	8	2	4	5	7	10		0	0	0	0	0	0	0	0	0	0		3	1	6	9	8	2	4	5
GB18767	GB50013	FBgn0036891	PPOAct	PPO - melanization	PPO - melan		30.95	9.89807	10.3373	7.41577	9.36247	3.85352	4.70193	3.28198	2.78243	10.5802		OK		10	7	8	5	6	3	4	2	1	9		0	0	0	0	0	0	0	0	0	0		10	7	8	5	6	3	4	2
GB10231	GB40163	FBgn0034539	CG11159	Lysozyme	Lysozyme		17.1012	0	1.88161	24.1609	12.6885	0	1.39917	99.5943	0.130992	4.20136		OK		8	1	5	9	7	1	4	10	3	6		0	0.5	0	0	0	0.5	0	0	0	0		8	1.5	5	9	7	1.5	4	10
GB19988	GB47104	FBgn0025827		Lysozyme	Lysozyme		42.5948	161.739	100.019	395.962	133.889	36.3476	88.5891	27.9609	112.149	124.59		OK		3	9	5	10	8	2	4	1	6	7		0	0	0	0	0	0	0	0	0	0		3	9	5	10	8	2	4	1
GB10567	GB49149	FBgn0004647	Notch	JNK cascade ; GO:0007254	JNK cascade		33.1423	73.1608	166.271	68.4625	129.32	44.4286	328.028	106.826	152.219	59.1206		OK		1	5	9	4	7	2	10	6	8	3		0	0	0	0	0	0	0	0	0	0		1	5	9	4	7	2	10	6
GB11373	GB45558	FBgn0010333	Rac1	JNK cascade ; GO:0007254	JNK cascade		3.8198	2.52251	12.4441	7.25842	4.37179	1.66015	4.90424	9.09931	6.68251	7.72899		OK		3	2	10	7	4	1	5	9	6	8		0	0	0	0	0	0	0	0	0	0		3	2	10	7	4	1	5	9
GB11819	GB47961	FBgn0024329	Mekk1	JNK cascade ; GO:0007254	JNK cascade		0.53935	1.2288	1.99394	1.2317	2.1888	4.13345	1.13104	2.2811	0.266884	1.35156		OK		2	4	7	5	8	10	3	9	1	6		0	0	0	0	0	0	0	0	0	0		2	4	7	5	8	10	3	9
gb12004	GB53318	FBgn0001291	Jun-related antigen	JNK cascade ; GO:0007254	JNK cascade		8.39903	3.70843	1.54738	2.76866	14.7824	1.95252	1.44198	6.19576	2.51805	12.5863		OK		8	6	2	5	10	3	1	7	4	9		0	0	0	0	0	0	0	0	0	0		8	6	2	5	10	3	1	7
GB12212	GB42049	FBgn0001297	kayak	JNK cascade ; GO:0007254	JNK cascade		17.4052	7.43517	13.7166	34.4367	30.0673	27.1853	15.7822	34.5059	8.75419	22.9762		OK		5	1	3	9	8	7	4	10	2	6		0	0	0	0	0	0	0	0	0	0		5	1	3	9	8	7	4	10
GB12587	GB49368	FBgn0014011	Rac2	JNK cascade ; GO:0007254	JNK cascade		0.40825	2.32528	0.875917	2.65226	4.36581	3.06071	0.393113	1.76587	1.03664	0		OK		3	7	4	8	10	9	2	6	5	1		0	0	0	0	0	0	0	0	0	0		3	7	4	8	10	9	2	6
GB12838	GB43176	FBgn0015286	Ras-related protein	JNK cascade ; GO:0007254	JNK cascade		1.05385	102.042	2.69591	38.2783	148.676	94.8108	3.04434	88.1292	2.98475	65.5498		OK		1	9	2	5	10	8	4	7	3	6		0	0	0	0	0	0	0	0	0	0		1	9	2	5	10	8	4	7
GB13135	GB47431	FBgn0014020	Rho1	JNK cascade ; GO:0007254	JNK cascade		12.4299	2.83189	10.5855	14.9759	13.0879	6.21257	6.38347	25.8072	7.28361	13.7941		OK		6	1	5	9	7	2	3	10	4	8		0	0	0	0	0	0	0	0	0	0		6	1	5	9	7	2	3	10
GB14469	GB44237	FBgn0004636	Roughened	JNK cascade ; GO:0007254	JNK cascade		47.8546	61.7729	96.54	179.351	131.545	16.6181	41.1509	20.5452	48.6458	59.088		OK		4	7	8	10	9	1	3	2	5	6		0	0	0	0	0	0	0	0	0	0		4	7	8	10	9	1	3	2
GB14925	GB50631	FBgn0010341	Cdc42	JNK cascade ; GO:0007254	JNK cascade		15.5169	22.3055	39.2921	11.39	5.10576	0	9.81876	1.27843	12.1667	10.1177		OK		8	9	10	6	3	1	4	2	7	5		0	0	0	0	0	0	0	0	0	0		8	9	10	6	3	1	4	2
GB15424	GB53394	FBgn0003371	shaggy	JNK cascade ; GO:0007254	JNK cascade		23.0548	49.1245	60.0876	120.404	98.5215	10.923	23.7156	12.5651	25.7017	34.3848		OK		3	7	8	10	9	1	4	2	5	6		0	0	0	0	0	0	0	0	0	0		3	7	8	10	9	1	4	2
GB16401	GB56012	FBgn0000229	basket	JNK cascade ; GO:0007254	JNK cascade		52.0039	661.851	1519.27	207.66	180.323	33.4281	1202.87	111.388	499.62	172.485		OK		2	8	10	6	5	1	9	3	7	4		0	0	0	0	0	0	0	0	0	0		2	8	10	6	5	1	9	3
GB16764	GB44888	FBgn0033483	eiger	JNK cascade ; GO:0007254	JNK cascade		21.4205	21.9257	27.6674	72.6611	189.462	7.91327	6.66619	5.63979	19.5919	11.5857		OK		6	7	8	9	10	3	2	1	5	4		0	0	0	0	0	0	0	0	0	0		6	7	8	9	10	3	2	1
GB17167	GB51894	FBgn0010303	hemipterous	JNK cascade ; GO:0007254	JNK cascade		2.17754	1.68744	3.56452	2.04721	2.85141	0.444227	1.14112	1.53778	1.97908	1.74996		OK		8	4	10	7	9	1	2	3	6	5		0	0	0	0	0	0	0	0	0	0		8	4	10	7	9	1	2	3
GB17935	GB45540	FBgn0000097	anterior open	JNK cascade ; GO:0007254	JNK cascade		3.92143	6.15035	5.99364	7.55223	8.55544	26.6301	4.65164	18.1912	4.79556	7.70575		OK		1	5	4	6	8	10	2	9	3	7		0	0	0	0	0	0	0	0	0	0		1	5	4	6	8	10	2	9
GB20112	GB45657	FBgn0010341	Cdc42	JNK cascade ; GO:0007254	JNK cascade		7.62788	6.00161	9.82184	18.6696	9.83616	5.49548	4.41145	5.74673	4.0805	7.2572		OK		7	5	8	10	9	3	2	4	1	6		0	0	0	0	0	0	0	0	0	0		7	5	8	10	9	3	2	4
GB19901	GB44634	FBgn0243512		JNK cascade	JNK cascade		78.6285	117.964	77.3535	149.361	138.707	20.0507	50.0944	35.0748	21.2507	38.3156		OK		7	8	6	10	9	1	5	3	2	4		0	0	0	0	0	0	0	0	0	0		7	8	6	10	9	1	5	3
GB11408	GB52985	FBgn0043884	multiple ankyrin repeats single KH domain	JAK-STAT cascade ; GO:0007259 and children	JAK-STAT ca		10.0055	4.25779	3.84931	9.27151	7.97525	5.17331	4.23589	6.1187	11.598	11.2087		OK		8	3	1	7	6	4	2	5	10	9		0	0	0	0	0	0	0	0	0	0		8	3	1	7	6	4	2	5
GB12007	GB40911	FBgn0003612	Suppressor of variegation 2-10	JAK-STAT cascade ; GO:0007259 and children	JAK-STAT ca		0.622523	2.62647	2.55714	2.69621	4.55196	10.7172	1.4209	13.7627	2.10764	2.35235		OK		1	6	5	7	8	9	2	10	3	4		0	0	0	0	0	0	0	0	0	0		1	6	5	7	8	9	2	10
GB12159	GB42244	FBgn0043903	domeless	JAK-STAT cascade ; GO:0007259 and children	JAK-STAT ca		1.70207	2.11038	1.57082	2.09256	2.57169	2.60422	0.9254	2.70449	2.02188	2.61136		OK		3	6	2	5	7	8	1	10	4	9		0	0	0	0	0	0	0	0	0	0		3	6	2	5	7	8	1	10
GB14092	GB42304	FBgn0001319	knot	JAK-STAT cascade ; GO:0007259 and children	JAK-STAT ca		21.9877	27.2737	11.1448	46.8076	147.995	52.5063	8.12397	98.9115	11.0137	37.7823		OK		4	5	3	7	10	8	1	9	2	6		0	0	0	0	0	0	0	0	0	0		4	5	3	7	10	8	1	9
GB16422	GB44594	FBgn0004864	hopscotch	JAK-STAT cascade ; GO:0007259 and children	JAK-STAT ca		1.32778	1.62638	2.05001	2.27668	2.88917	1.28446	1.97968	2.22319	1.13779	2.2233		OK		3	4	6	9	10	2	5	7	1	8		0	0	0	0	0	0	0	0	0	0		3	4	6	9	10	2	5	7
GB18923	GB50020	FBgn0016917	Signal-transducer and activator of transcription protein at 92E	JAK-STAT cascade ; GO:0007259 and children	JAK-STAT ca		2.44403	5.12864	3.20571	8.88866	9.10013	5.7863	0.805117	10.2007	1.5829	4.95026		OK		3	6	4	8	9	7	1	10	2	5		0	0	0	0	0	0	0	0	0	0		3	6	4	8	9	7	1	10
GB14250	GB51500	FBgn0085402		JAK-STAT cascade	JAK-STAT ca		7.19814	20.666	11.1266	25.632	13.8645	13.3378	3.22332	14.7829	7.10535	7.73051		OK		3	9	5	10	7	6	1	8	2	4		0	0	0	0	0	0	0	0	0	0		3	9	5	10	7	6	1	8
GB18949	GB55283	FBgn0041184		JAK-STAT cascade	JAK-STAT ca		1.03972	8.2549	4.63314	6.64307	1.78833	5.43285	3.00352	9.81225	2.06777	3.12992		OK		1	9	6	8	2	7	4	10	3	5		0	0	0	0	0	0	0	0	0	0		1	9	6	8	2	7	4	10
GB10026	GB44490	FBgn0031213		immune-related	immune-rela		10.8411	5.83449	7.77686	9.4782	16.4317	3.83989	5.34289	6.64624	6.43602	6.26457		OK		9	3	7	8	10	1	2	6	5	4		0	0	0	0	0	0	0	0	0	0		9	3	7	8	10	1	2	6
GB11320	GB53101	FBgn0020305		immune-related	immune-rela		2.63824	11.7857	1.74168	5.6827	5.3618	0.775659	1.34493	0.447515	2.72815	1.66668		OK		6	10	5	9	8	2	3	1	7	4		0	0	0	0	0	0	0	0	0	0		6	10	5	9	8	2	3	1
GB11902	GB45882	FBgn0003326		immune-related	immune-rela		2.42485	0.939545	1.79682	1.87053	0.895585	1.48404	0.857735	2.56864	1.62389	1.24009		OK		9	3	7	8	2	5	1	10	6	4		0	0	0	0	0	0	0	0	0	0		9	3	7	8	2	5	1	10
GB12454	GB48687	not found		immune-related	immune-rela		350.473	159.986	108.163	213.781	563.08	9.71935	30.9347	4.82053	14.7002	59.4164		OK		9	7	6	8	10	2	4	1	3	5		0	0	0	0	0	0	0	0	0	0		9	7	6	8	10	2	4	1
GB12883	GB50507	not found		immune-related	immune-rela		28.7305	9.32776	4.12477	17.6622	49.201	13.3455	5.14224	11.0875	3.922	14.338		OK		9	4	2	8	10	6	3	5	1	7		0	0	0	0	0	0	0	0	0	0		9	4	2	8	10	6	3	5
GB13522	GB47208	FBgn0030018		immune-related	immune-rela		0.501461	0.544037	0.744859	2.62318	3.65365	4.2966	0.563347	5.88743	0.909519	1.4746		OK		1	2	4	7	8	9	3	10	5	6		0	0	0	0	0	0	0	0	0	0		1	2	4	7	8	9	3	10
GB13979	GB50509	not found		immune-related	immune-rela		10.4033	2.07911	3.01225	7.83302	6.00555	1.82445	1.93322	7.89459	1.61612	3.48467		OK		10	4	5	8	7	2	3	9	1	6		0	0	0	0	0	0	0	0	0	0		10	4	5	8	7	2	3	9
GB14645	GB50508	FBgn0243514		immune-related	immune-rela		248.275	134.016	94.0171	161.732	359.881	9.59939	24.3139	5.717	10.2701	49.718		OK		9	7	6	8	10	2	4	1	3	5		0	0	0	0	0	0	0	0	0	0		9	7	6	8	10	2	4	1
GB14962	GB54664	FBgn0027594		immune-related	immune-rela		4.19738	1.06254	2.08747	4.36303	5.06413	1.95803	0.718534	4.19596	0.612159	2.10364		OK		8	3	5	9	10	4	2	7	1	6		0	0	0	0	0	0	0	0	0	0		8	3	5	9	10	4	2	7
GB15645	GB45138	FBgn0030505		immune-related	immune-rela		16.1033	23.7794	11.0246	26.1167	34.1333	30.4484	8.65562	88.6957	6.79005	35.1529		OK		4	5	3	6	8	7	2	10	1	9		0	0	0	0	0	0	0	0	0	0		4	5	3	6	8	7	2	10
GB17018	GB42358	FBgn0087011		immune-related	immune-rela		1.12386	4.5342	2.13307	5.06115	10.054	7.72361	1.48801	12.3556	1.97567	6.0349		OK		1	5	4	6	9	8	2	10	3	7		0	0	0	0	0	0	0	0	0	0		1	5	4	6	9	8	2	10
GB18324	GB46478	FBgn0052226		immune-related	immune-rela		0.906513	1.45631	1.24294	2.47104	4.87579	5.40216	0.884094	8.44543	0.65378	2.18426		OK		3	5	4	7	8	9	2	10	1	6		0	0	0	0	0	0	0	0	0	0		3	5	4	7	8	9	2	10
GB19452	GB42685	not found		immune-related	immune-rela		4.21763	12.222	11.7602	20.8453	15.3387	3.88318	4.52438	6.40112	2.90502	7.35059		OK		3	8	7	10	9	2	4	5	1	6		0	0	0	0	0	0	0	0	0	0		3	8	7	10	9	2	4	5
GB20003	GB42082	FBgn0041780		immune-related	immune-rela		0.247177	1.87714	3.07318	3.50361	3.93106	0	1.42807	1.90072	1.38402	1.17981		OK		2	6	8	9	10	1	5	7	4	3		0	0	0	0	0	0	0	0	0	0		2	6	8	9	10	1	5	7
GB10009	GB50238	FBgn0003884	alpha-Tubulin at 84B	Immune system process (GO:0002376)	Immune syst		57.087	14.9966	11.9994	7.42173	3.83954	0	7.145	2.07067	16.3401	12.6924		OK		10	8	6	5	3	1	4	2	9	7		0	0	0	0	0	0	0	0	0	0		10	8	6	5	3	1	4	2
GB10069	GB51712	FBgn0261560	Thor	Immune system process (GO:0002376)	Immune syst		20.8776	29.4979	54.8637	22.1756	15.7097	4.85341	22.545	7.9338	40.969	21.4367		OK		4	8	10	6	3	1	7	2	9	5		0	0	0	0	0	0	0	0	0	0		4	8	10	6	3	1	7	2
GB10124	GB46739	FBgn0013576	mustard	Immune system process (GO:0002376)	Immune syst		32.0482	89.5333	144.076	114.931	132.793	50.3469	244.089	88.2527	301.813	106.057		OK		1	4	8	6	7	2	9	3	10	5		0	0	0	0	0	0	0	0	0	0		1	4	8	6	7	2	9	3
GB10171	GB55582	FBgn0261617	nejire	Immune system process (GO:0002376)	Immune syst		0.262157	2.48863	0.951871	0.928987	0.646961	0	0.126219	0.377984	0.614472	0.703864		OK		3	10	9	8	6	1	2	4	5	7		0	0	0	0	0	0	0	0	0	0		3	10	9	8	6	1	2	4
GB10274	GB52588	FBgn0010247		Immune system process (GO:0002376)	Immune syst		2.46979	3.31409	2.59895	2.74186	2.62744	1.39221	1.29342	1.55291	1.61772	1.99432		OK		6	10	7	9	8	2	1	3	4	5		0	0	0	0	0	0	0	0	0	0		6	10	7	9	8	2	1	3
GB10471	GB45135	FBgn0028982	Spt6	Immune system process (GO:0002376)	Immune syst		3.64833	5.49902	2.89573	4.27655	3.25317	6.68143	1.81464	5.46102	2.39351	3.04081		OK		6	9	3	7	5	10	1	8	2	4		0	0	0	0	0	0	0	0	0	0		6	9	3	7	5	10	1	8
GB10524	GB55808	FBgn0020306		Immune system process (GO:0002376)	Immune syst		1.40164	16.2874	0.880724	7.50021	14.8085	6.2459	0.628763	9.44717	1.14128	4.927		OK		4	10	2	7	9	6	1	8	3	5		0	0	0	0	0	0	0	0	0	0		4	10	2	7	9	6	1	8
GB10574	GB43216	FBgn0261547	Ephexin	Immune system process (GO:0002376)	Immune syst		3.23	6.63209	4.2094	7.99801	12.6357	9.0884	2.85682	14.3507	2.16843	5.69582		OK		3	6	4	7	9	8	2	10	1	5		0	0	0	0	0	0	0	0	0	0		3	6	4	7	9	8	2	10
GB10654	GB47452	FBgn0261797	Dynein heavy chain 64C	Immune system process (GO:0002376)	Immune syst		1.65066	5.73058	1.31803	4.19666	5.14692	8.01445	0.968814	21.1703	1.23439	18.0651		OK		4	7	3	5	6	8	1	10	2	9		0	0	0	0	0	0	0	0	0	0		4	7	3	5	6	8	1	10
GB10667	GB50038	FBgn0001108	Glued	Immune system process (GO:0002376)	Immune syst		2.30323	1.05552	3.13279	2.7675	4.57333	1.19087	1.87368	2.74828	3.16467	1.91915		OK		5	1	8	7	10	2	3	6	9	4		0	0	0	0	0	0	0	0	0	0		5	1	8	7	10	2	3	6
GB10718	GB53167	FBgn0085432		Immune system process (GO:0002376)	Immune syst		20.2174	21.4239	29.6425	64.7935	103.654	7.83324	14.4877	20.7891	9.06123	23.5641		OK		4	6	8	9	10	1	3	5	2	7		0	0	0	0	0	0	0	0	0	0		4	6	8	9	10	1	3	5
GB10863	GB41845	FBgn0036844	Mitogen-activated protein kinase phosphatase 3	Immune system process (GO:0002376)	Immune syst		3.61522	0.980541	1.55132	1.83014	5.2681	1.03253	0.745968	1.48929	0.68597	1.2942		OK		9	3	7	8	10	4	2	6	1	5		0	0	0	0	0	0	0	0	0	0		9	3	7	8	10	4	2	6
GB10917	GB52158	FBgn0031975	Transglutaminase	Immune system process (GO:0002376)	Immune syst		27.5609	12.9758	2.74638	11.0565	11.4887	5.94078	6.10421	12.8532	23.768	11.1695		OK		10	8	1	4	6	2	3	7	9	5		0	0	0	0	0	0	0	0	0	0		10	8	1	4	6	2	3	7
GB10996	GB53462	FBgn0005630	longitudinals lacking	Immune system process (GO:0002376)	Immune syst		8.69068	120.214	2.45885	34.0962	9.19166	214.082	4.18423	221.072	2.30377	40.556		OK		4	8	2	6	5	9	3	10	1	7		0	0	0	0	0	0	0	0	0	0		4	8	2	6	5	9	3	10
GB11052	GB43375	FBgn0040324	Ephrin	Immune system process (GO:0002376)	Immune syst		8.89863	7.14468	3.55837	8.67295	8.09985	8.273	3.00154	11.0964	4.89108	8.40711		OK		9	4	2	8	5	6	1	10	3	7		0	0	0	0	0	0	0	0	0	0		9	4	2	8	5	6	1	10
GB11073	GB53490	FBgn0005630	longitudinals lacking	Immune system process (GO:0002376)	Immune syst		15.2925	5.8068	28.7004	46.9655	65.415	6.55143	13.7438	7.55967	18.1781	26.5904		OK		5	1	8	9	10	2	4	3	6	7		0	0	0	0	0	0	0	0	0	0		5	1	8	9	10	2	4	3
GB11075	GB47732	FBgn0260936	scrawny	Immune system process (GO:0002376)	Immune syst		0.658857	1.59205	1.66074	2.05175	1.67523	1.7962	0.730555	3.10894	1.07633	1.50094		OK		1	5	6	9	7	8	2	10	3	4		0	0	0	0	0	0	0	0	0	0		1	5	6	9	7	8	2	10
GB11202	GB49929	FBgn0002526	Laminin A	Immune system process (GO:0002376)	Immune syst		2.63408	89.271	2.34856	33.2062	52.2031	138.161	3.58111	166.408	1.18868	40.4824		OK		3	8	2	5	7	9	4	10	1	6		0	0	0	0	0	0	0	0	0	0		3	8	2	5	7	9	4	10
GB11241	GB45708	FBgn0031975	Transglutaminase	Immune system process (GO:0002376)	Immune syst		257.509	21.0219	29.8807	86.073	123.085	48.6104	16.0409	22.868	47.6969	187.476		OK		10	2	4	7	8	6	1	3	5	9		0	0	0	0	0	0	0	0	0	0		10	2	4	7	8	6	1	3
GB11364	GB47224	FBgn0000568	Ecdysone-induced protein 75B	Immune system process (GO:0002376)	Immune syst		57.9963	18.479	32.4127	97.2715	125.359	16.9862	57.6339	44.4197	87.7893	154.742		OK		6	2	3	8	9	1	5	4	7	10		0	0	0	0	0	0	0	0	0	0		6	2	3	8	9	1	5	4
GB11410	GB52999	FBgn0027932	A kinase anchor protein 200	Immune system process (GO:0002376)	Immune syst		324.801	481.847	331.287	870.257	839.153	1242.23	124.094	1000.06	112.783	934.458		OK		3	5	4	7	6	10	2	9	1	8		0	0	0	0	0	0	0	0	0	0		3	5	4	7	6	10	2	9
GB11411	GB45655	FBgn0004837	Suppressor of Hairless	Immune system process (GO:0002376)	Immune syst		2.19125	0	0.137771	1.47904	1.37337	0.521529	0.167461	1.80537	0.326101	0		OK		10	1	3	8	7	6	4	9	5	1		0	0.5	0	0	0	0	0	0	0	0.5		10	1.5	3	8	7	6	4	9
GB11564	GB43099	FBgn0028982	Spt6	Immune system process (GO:0002376)	Immune syst		3.2016	3.09884	2.9839	3.59638	4.64767	3.29452	1.26943	3.43948	2.34202	3.98898		OK		5	4	3	8	10	6	1	7	2	9		0	0	0	0	0	0	0	0	0	0		5	4	3	8	10	6	1	7
GB11581	GB53848	FBgn0036752	Adenosine deaminase-related growth factor A	Immune system process (GO:0002376)	Immune syst		4.38135	6.35219	3.78645	4.04614	3.66969	3.58338	1.58529	2.75657	0.809111	2.13881		OK		9	10	7	8	6	5	2	4	1	3		0	0	0	0	0	0	0	0	0	0		9	10	7	8	6	5	2	4
GB11734	GB41654	FBgn0013799	Deformed epidermal autoregulatory factor-1	Immune system process (GO:0002376)	Immune syst		0.447405	0	0.775325	3.03875	3.49639	5.03139	0.179507	2.90285	1.7041	3.20329		OK		3	1	4	7	9	10	2	6	5	8		0	0	0	0	0	0	0	0	0	0		3	1	4	7	9	10	2	6
GB11906	GB45526	FBgn0021895		Immune system process (GO:0002376)	Immune syst		6.54438	14.1304	7.58185	10.1555	43.279	78.8875	4.44828	89.5478	5.96533	17.4561		OK		3	6	4	5	8	9	1	10	2	7		0	0	0	0	0	0	0	0	0	0		3	6	4	5	8	9	1	10
GB11941	GB43092	FBgn0013762	Cyclin-dependent kinase 5	Immune system process (GO:0002376)	Immune syst		21.903	10.4605	18.0522	11.2023	5.86969	1.12859	6.71141	3.77661	14.4136	11.3169		OK		10	5	9	6	3	1	4	2	8	7		0	0	0	0	0	0	0	0	0	0		10	5	9	6	3	1	4	2
GB12005	GB42215	FBgn0004657	myospheroid	Immune system process (GO:0002376)	Immune syst		3.56521	1.9594	1.08391	2.9368	4.63072	1.17232	0.331257	1.21746	0.806331	1.7633		OK		9	7	3	8	10	4	1	5	2	6		0	0	0	0	0	0	0	0	0	0		9	7	3	8	10	4	1	5
GB12053	GB50037	FBgn0003884	alpha-Tubulin at 84B	Immune system process (GO:0002376)	Immune syst		0.49043	3.35203	1.03605	1.1586	2.58198	0	0.787077	1.97991	0.306539	1.75567		OK		3	10	5	6	9	1	4	8	2	7		0	0	0	0	0	0	0	0	0	0		3	10	5	6	9	1	4	8
GB12064	GB50654	FBgn0032363	CG6509	Immune system process (GO:0002376)	Immune syst		0.466224	3.20345	1.45832	4.14342	6.83034	5.21529	1.0404	4.54543	0.711178	2.0664		OK		1	6	4	7	10	9	3	8	2	5		0	0	0	0	0	0	0	0	0	0		1	6	4	7	10	9	3	8
GB12173	GB54228	FBgn0029113	Smt3 activating enzyme 2	Immune system process (GO:0002376)	Immune syst		0.512124	2.528	3.51611	1.93576	2.19066	2.04772	0.969836	1.47678	1.46045	1.28333		OK		1	9	10	6	8	7	2	5	4	3		0	0	0	0	0	0	0	0	0	0		1	9	10	6	8	7	2	5
GB12207	GB54477	FBgn0003731	Epidermal growth factor receptor	Immune system process (GO:0002376)	Immune syst		8.83896	29.7041	11.3505	31.4057	32.0004	26.932	10.3849	19.2867	11.1344	10.5333		OK		1	8	5	9	10	7	2	6	4	3		0	0	0	0	0	0	0	0	0	0		1	8	5	9	10	7	2	6
GB12209	GB55970	FBgn0005655	mutagen-sensitive 209	Immune system process (GO:0002376)	Immune syst		2.50652	3.80707	5.58787	2.86963	1.52263	13.2988	3.05721	15.4566	1.6872	4.41748		OK		3	6	8	4	1	9	5	10	2	7		0	0	0	0	0	0	0	0	0	0		3	6	8	4	1	9	5	10
GB12228	GB55583	FBgn0261617	nejire	Immune system process (GO:0002376)	Immune syst		3.28255	5.78915	3.23515	5.67826	7.39695	3.81005	1.33824	6.05626	2.05417	4.00985		OK		4	8	3	7	10	5	1	9	2	6		0	0	0	0	0	0	0	0	0	0		4	8	3	7	10	5	1	9
GB12280	GB44534	FBgn0039141	spastin	Immune system process (GO:0002376)	Immune syst		1.26225	2.08391	1.05068	1.42616	5.95921	2.46869	0.704611	3.16512	2.20824	3.14344		OK		3	5	2	4	10	7	1	9	6	8		0	0	0	0	0	0	0	0	0	0		3	5	2	4	10	7	1	9
GB12288	GB42607	FBgn0264294	Cytochrome b5	Immune system process (GO:0002376)	Immune syst		33.8452	12.3676	5.32878	27.6	28.4239	2.12337	1.8636	6.12536	0.940453	0.760425		OK		10	7	5	8	9	4	3	6	2	1		0	0	0	0	0	0	0	0	0	0		10	7	5	8	9	4	3	6
GB12298	GB48789	FBgn0032363	CG6509	Immune system process (GO:0002376)	Immune syst		1.02189	1.09819	0.521874	1.41204	6.7884	0.578208	0.457963	2.00158	0.632698	1.06986		OK		5	7	2	8	10	3	1	9	4	6		0	0	0	0	0	0	0	0	0	0		5	7	2	8	10	3	1	9
GB12312	GB47313	FBgn0003261	Rm62	Immune system process (GO:0002376)	Immune syst		9.61242	4.21153	5.0441	11.3543	8.31281	1.84784	8.62314	4.6198	12.1319	8.82337		OK		8	2	4	9	5	1	6	3	10	7		0	0	0	0	0	0	0	0	0	0		8	2	4	9	5	1	6	3
GB12357	GB42600	FBgn0036844	Mitogen-activated protein kinase phosphatase 3	Immune system process (GO:0002376)	Immune syst		1.87272	9.29902	3.89913	12.0813	12.3242	15.1201	1.61833	10.8005	2.9826	13.9239		OK		2	5	4	7	8	10	1	6	3	9		0	0	0	0	0	0	0	0	0	0		2	5	4	7	8	10	1	6
GB12373	GB46510	FBgn0010247	Poly-(ADP-ribose) polymerase	Immune system process (GO:0002376)	Immune syst		0.717886	0.363457	1.32699	0.791442	1.25982	0.239204	0.921692	1.24208	1.10308	0.428322		OK		4	2	10	5	9	1	6	8	7	3		0	0	0	0	0	0	0	0	0	0		4	2	10	5	9	1	6	8
GB12465	GB45757	FBgn0003896	tailup	Immune system process (GO:0002376)	Immune syst		10.5229	20.7008	19.9201	40.2846	57.5697	23.4459	14.9347	101.27	6.33955	125.947		OK		2	5	4	7	8	6	3	9	1	10		0	0	0	0	0	0	0	0	0	0		2	5	4	7	8	6	3	9
GB12478	GB49992	FBgn0021895	yantar	Immune system process (GO:0002376)	Immune syst		4.25703	8.77509	11.0407	7.47084	7.404	7.295	5.81696	2.80589	8.83774	3.91875		OK		3	8	10	7	6	5	4	1	9	2		0	0	0	0	0	0	0	0	0	0		3	8	10	7	6	5	4	1
GB12556	GB55472	FBgn0003205	Ras oncogene at 85D	Immune system process (GO:0002376)	Immune syst		25.5195	12.5034	3.57775	7.77906	4.51455	1.37149	3.83132	4.74768	9.37964	8.34976		OK		10	9	2	6	4	1	3	5	8	7		0	0	0	0	0	0	0	0	0	0		10	9	2	6	4	1	3	5
GB12585	GB41629	FBgn0025936	Eph receptor tyrosine kinase	Immune system process (GO:0002376)	Immune syst		14.8609	18.138	7.15363	21.3154	42.7868	15.4742	4.37248	22.7022	4.82059	14.8833		OK		4	7	3	8	10	6	1	9	2	5		0	0	0	0	0	0	0	0	0	0		4	7	3	8	10	6	1	9
GB12639	GB55272	FBgn0011202	diaphanous	Immune system process (GO:0002376)	Immune syst		6.98027	27.9167	3.6538	15.3682	23.9875	5.57384	2.41283	7.62267	1.6942	9.61092		OK		5	10	3	8	9	4	2	6	1	7		0	0	0	0	0	0	0	0	0	0		5	10	3	8	9	4	2	6
GB12643	GB55408	FBgn0030964	PDGF- and VEGF-related factor 1	Immune system process (GO:0002376)	Immune syst		18.4271	51.541	16.8355	27.5966	82.4238	106.08	7.89499	92.753	6.49158	46.6772		OK		4	7	3	5	8	10	2	9	1	6		0	0	0	0	0	0	0	0	0	0		4	7	3	5	8	10	2	9
GB12742	GB53016	FBgn0085407	PDGF- and VEGF-related factor 3	Immune system process (GO:0002376)	Immune syst		28.1565	26.7287	15.2758	27.2439	38.1925	30.6909	8.02801	51.3936	12.6376	30.2925		OK		6	4	3	5	9	8	1	10	2	7		0	0	0	0	0	0	0	0	0	0		6	4	3	5	9	8	1	10
GB12839	GB46452	FBgn0000996	double parked	Immune system process (GO:0002376)	Immune syst		0.489857	1.86007	1.6888	3.086	2.05959	1.3602	1.38015	2.19734	2.14752	1.16908		OK		1	6	5	10	7	3	4	9	8	2		0	0	0	0	0	0	0	0	0	0		1	6	5	10	7	3	4	9
GB13057	GB40690	FBgn0264707	RhoGEF3	Immune system process (GO:0002376)	Immune syst		6.7925	32.7239	16.7947	37.434	46.1326	22.2794	9.85868	28.279	6.60058	15.3876		OK		2	8	5	9	10	6	3	7	1	4		0	0	0	0	0	0	0	0	0	0		2	8	5	9	10	6	3	7
GB13109	GB44213	FBgn0014141	cheerio	Immune system process (GO:0002376)	Immune syst		18.3329	9.18504	6.10182	9.32367	13.5728	16.6715	3.04027	11.6745	3.55104	7.24656		OK		10	5	3	6	8	9	1	7	2	4		0	0	0	0	0	0	0	0	0	0		10	5	3	6	8	9	1	7
GB13113	GB50397	FBgn0021873	Gef26	Immune system process (GO:0002376)	Immune syst		11.9063	10.1909	10.5876	13.7181	14.4239	3.41446	4.82403	13.9305	4.81644	8.4431		OK		7	5	6	8	10	1	3	9	2	4		0	0	0	0	0	0	0	0	0	0		7	5	6	8	10	1	3	9
GB13159	GB53150	FBgn0263289	scribbled	Immune system process (GO:0002376)	Immune syst		3.71096	6.89878	3.50891	6.16419	6.55055	12.9448	2.55595	113.03	3.30711	70.3675		OK		4	7	3	5	6	8	1	10	2	9		0	0	0	0	0	0	0	0	0	0		4	7	3	5	6	8	1	10
GB13170	GB46539	FBgn0040068	vav	Immune system process (GO:0002376)	Immune syst		7.16429	4.13701	5.60146	4.40676	4.88857	3.96032	2.82941	3.23694	3.39202	3.72298		OK		10	6	9	7	8	5	1	2	3	4		0	0	0	0	0	0	0	0	0	0		10	6	9	7	8	5	1	2
GB13192	GB49985	FBgn0259984		Immune system process (GO:0002376)	Immune syst		21.9146	55.6109	61.5861	54.9284	99.2526	42.2097	75.2928	76.1411	42.958	43.499		OK		1	6	7	5	10	2	8	9	3	4		0	0	0	0	0	0	0	0	0	0		1	6	7	5	10	2	8	9
GB13202	GB40333	FBgn0040324	Ephrin	Immune system process (GO:0002376)	Immune syst		56.4526	101.055	50.667	102.246	144.181	131.673	32.1843	175.967	39.1708	87.0922		OK		4	6	3	7	9	8	1	10	2	5		0	0	0	0	0	0	0	0	0	0		4	6	3	7	9	8	1	10
GB13381	GB52563	FBgn0000212	brahma	Immune system process (GO:0002376)	Immune syst		5.60301	15.3284	9.40751	31.0071	56.8336	23.043	4.14912	21.5004	6.70435	11.1346		OK		2	6	4	9	10	8	1	7	3	5		0	0	0	0	0	0	0	0	0	0		2	6	4	9	10	8	1	7
GB13405	GB54530	FBgn0031216	CG11376	Immune system process (GO:0002376)	Immune syst		0.505671	3.5063	0.47897	2.18146	5.85978	4.94491	0.564548	6.2765	0.455204	1.29865		OK		3	7	2	6	9	8	4	10	1	5		0	0	0	0	0	0	0	0	0	0		3	7	2	6	9	8	4	10
GB13459	GB51481	FBgn0031464	Dual oxidase	Immune system process (GO:0002376)	Immune syst		8.43767	7.04642	6.50822	6.74719	6.77397	23.4774	4.02053	23.9132	3.79458	12.8711		OK		7	6	3	4	5	9	2	10	1	8		0	0	0	0	0	0	0	0	0	0		7	6	3	4	5	9	2	10
GB13523	GB53472	FBgn0005630	longitudinals lacking	Immune system process (GO:0002376)	Immune syst		5.70978	9.63598	2.16392	10.4914	14.9606	26.4241	0.746653	22.5631	2.23053	9.08454		OK		4	6	2	7	8	10	1	9	3	5		0	0	0	0	0	0	0	0	0	0		4	6	2	7	8	10	1	9
GB13567	GB41547	FBgn0259099	Doublecortin-domain-containing echinoderm-microtubule-associated protein ortholog	Immune system process (GO:0002376)	Immune syst		5.96259	17.9834	22.7069	13.8044	14.014	7.49298	8.59588	8.94087	4.51218	8.29416		OK		2	9	10	7	8	3	5	6	1	4		0	0	0	0	0	0	0	0	0	0		2	9	10	7	8	3	5	6
GB13582	GB54852	FBgn0032006	PDGF- and VEGF-receptor related	Immune system process (GO:0002376)	Immune syst		1.3838	2.42516	1.96763	2.95478	4.29064	2.66015	2.25499	6.29254	1.33067	2.38164		OK		2	6	3	8	9	7	4	10	1	5		0	0	0	0	0	0	0	0	0	0		2	6	3	8	9	7	4	10
GB13642	GB41009	FBgn0031975	Transglutaminase	Immune system process (GO:0002376)	Immune syst		6.39536	0	0	0.755426	1.05218	0	1.02637	0	3.99737	1.14473		OK		10	1	1	5	7	1	6	1	9	8		0	1.5	1.5	0	0	1.5	0	1.5	0	0		10	2.5	2.5	5	7	2.5	6	2.5
GB13665	GB49498	FBgn0038046	CG5641	Immune system process (GO:0002376)	Immune syst		2.70569	2.93541	3.01954	2.20675	2.75567	3.54182	1.40607	4.45842	1.13248	2.65212		OK		5	7	8	3	6	9	2	10	1	4		0	0	0	0	0	0	0	0	0	0		5	7	8	3	6	9	2	10
GB13670	GB46338	FBgn0043550	Tetraspanin 68C	Immune system process (GO:0002376)	Immune syst		1.84424	1.75072	1.02184	2.87865	14.6292	7.24249	1.05706	7.97721	0.87484	3.77265		OK		5	4	2	6	10	8	3	9	1	7		0	0	0	0	0	0	0	0	0	0		5	4	2	6	10	8	3	9
GB13747	GB47828	FBgn0011764		Immune system process (GO:0002376)	Immune syst		4.30062	5.31222	4.01925	5.75318	6.30828	4.92053	3.35951	11.0567	3.05647	8.0688		OK		4	6	3	7	8	5	2	10	1	9		0	0	0	0	0	0	0	0	0	0		4	6	3	7	8	5	2	10
GB13819	GB51694	FBgn0003447	singed	Immune system process (GO:0002376)	Immune syst		0.858056	7.54526	8.2435	1.9204	1.7832	0.902874	2.00038	0.911595	1.32316	1.05085		OK		1	9	10	7	6	2	8	3	5	4		0	0	0	0	0	0	0	0	0	0		1	9	10	7	6	2	8	3
GB13884	GB49904	FBgn0000490	decapentaplegic	Immune system process (GO:0002376)	Immune syst		1.55648	117.613	0.462391	172.454	234.821	556.229	14.6879	701.076	0.790452	425.977		OK		3	5	1	6	7	9	4	10	2	8		0	0	0	0	0	0	0	0	0	0		3	5	1	6	7	9	4	10
GB13967	GB40759	FBgn0043841	virus-induced RNA 1	Immune system process (GO:0002376)	Immune syst		62.615	25.7946	22.3255	61.0531	80.1774	16.2383	20.003	36.6229	36.114	67.1402		OK		8	4	3	7	10	1	2	6	5	9		0	0	0	0	0	0	0	0	0	0		8	4	3	7	10	1	2	6
GB14060	GB48932	FBgn0260935	immune response deficient 1	Immune system process (GO:0002376)	Immune syst		3.89178	17.9606	17.1644	3.14718	4.77752	3.44142	4.52581	6.04289	6.28013	7.34111		OK		3	10	9	1	5	2	4	6	7	8		0	0	0	0	0	0	0	0	0	0		3	10	9	1	5	2	4	6
GB14141	GB52278	FBgn0014141	cheerio	Immune system process (GO:0002376)	Immune syst		65.6391	32.4917	55.7969	42.8424	53.9502	7.17397	20.1648	13.6906	19.7545	25.6916		OK		10	6	9	7	8	1	4	2	3	5		0	0	0	0	0	0	0	0	0	0		10	6	9	7	8	1	4	2
GB14169	GB50932	FBgn0003117	pannier	Immune system process (GO:0002376)	Immune syst		3.2818	4.27253	2.92483	7.64224	10.4901	4.21786	2.22714	9.86914	4.15748	6.29379		OK		3	6	2	8	10	5	1	9	4	7		0	0	0	0	0	0	0	0	0	0		3	6	2	8	10	5	1	9
GB14289	GB51067	FBgn0082598	akirin	Immune system process (GO:0002376)	Immune syst		1.37678	2.09114	7.87111	3.90304	4.25841	1.65151	2.93429	3.49372	2.51709	1.8729		OK		1	4	10	8	9	2	6	7	5	3		0	0	0	0	0	0	0	0	0	0		1	4	10	8	9	2	6	7
GB14441	GB56005	FBgn0026379	Pten	Immune system process (GO:0002376)	Immune syst		1.06745	2.36441	0.411072	1.05073	2.19524	4.44601	0.799455	3.33465	1.112	0.796107		OK		5	8	1	4	7	10	3	9	6	2		0	0	0	0	0	0	0	0	0	0		5	8	1	4	7	10	3	9
GB14446	GB44948	FBgn0259099	Doublecortin-domain-containing echinoderm-microtubule-associated protein ortholog	Immune system process (GO:0002376)	Immune syst		11.765	6.51993	6.61234	8.4884	9.41648	5.72134	4.28657	5.86829	4.17368	7.9681		OK		10	5	6	8	9	3	2	4	1	7		0	0	0	0	0	0	0	0	0	0		10	5	6	8	9	3	2	4
GB14487	GB44982	FBgn0010395	beta[nu] integrin	Immune system process (GO:0002376)	Immune syst		0.658532	2.88525	2.50812	1.6754	3.58367	5.06371	1.31701	2.62935	0.692614	1.2694		OK		1	8	6	5	9	10	4	7	2	3		0	0	0	0	0	0	0	0	0	0		1	8	6	5	9	10	4	7
GB14518	GB55704	FBgn0026207	members only	Immune system process (GO:0002376)	Immune syst		13.7413	164.864	11.3395	102.669	32.0048	157.014	9.14009	62.8989	9.78219	19.0397		OK		4	10	3	8	6	9	1	7	2	5		0	0	0	0	0	0	0	0	0	0		4	10	3	8	6	9	1	7
GB14545	GB42785	FBgn0039702	Vacuolar protein sorting 16B	Immune system process (GO:0002376)	Immune syst		12.3309	10.3095	9.26071	7.61677	5.3975	1.13085	6.2092	2.60976	15.5561	7.28966		OK		9	8	7	6	3	1	4	2	10	5		0	0	0	0	0	0	0	0	0	0		9	8	7	6	3	1	4	2
GB14602	GB43446	FBgn0040505		Immune system process (GO:0002376)	Immune syst		4.77906	4.25317	3.58632	5.64507	7.67835	4.85189	2.80426	9.58217	2.75666	7.28442		OK		5	4	3	7	9	6	2	10	1	8		0	0	0	0	0	0	0	0	0	0		5	4	3	7	9	6	2	10
GB14619	GB42579	FBgn0262738	no receptor potential A	Immune system process (GO:0002376)	Immune syst		4.28142	4.74931	1.71493	3.57985	17.8868	5.04919	1.01909	9.84913	1.39065	3.87478		OK		6	7	3	4	10	8	1	9	2	5		0	0	0	0	0	0	0	0	0	0		6	7	3	4	10	8	1	9
GB14763	GB53451	FBgn0005630	longitudinals lacking	Immune system process (GO:0002376)	Immune syst		4.54455	0	1.8001	2.68404	0.747682	0	0.437606	7.86292	0.177534	8.13444		OK		8	1	6	7	5	1	4	9	3	10		0	0.5	0	0	0	0.5	0	0	0	0		8	1.5	6	7	5	1.5	4	9
GB14801	GB49927	FBgn0050420	Activating transcription factor-2	Immune system process (GO:0002376)	Immune syst		0.820937	0.623446	1.95104	2.32728	2.161	2.46187	1.3175	3.78766	1.34694	2.05719		OK		2	1	5	8	7	9	3	10	4	6		0	0	0	0	0	0	0	0	0	0		2	1	5	8	7	9	3	10
GB14813	GB42608	FBgn0264294	Cytochrome b5	Immune system process (GO:0002376)	Immune syst		137.841	54.3283	42.6195	108.821	136.642	43.6041	21.3377	51.3209	17.3813	77.4534		OK		10	6	3	8	9	4	2	5	1	7		0	0	0	0	0	0	0	0	0	0		10	6	3	8	9	4	2	5
GB14837	GB53251	FBgn0243511		Immune system process (GO:0002376)	Immune syst		0.639352	4.33522	2.92441	3.50633	4.65832	10.2714	1.80297	13.6958	3.79998	4.57758		OK		1	6	3	4	8	9	2	10	5	7		0	0	0	0	0	0	0	0	0	0		1	6	3	4	8	9	2	10
GB14882	GB53826	FBgn0011766	E2F transcription factor	Immune system process (GO:0002376)	Immune syst		0.746815	0.708945	4.93023	3.30805	2.76453	1.39975	0.868944	2.69194	1.714	2.00512		OK		2	1	10	9	8	4	3	7	5	6		0	0	0	0	0	0	0	0	0	0		2	1	10	9	8	4	3	7
GB14945	GB53149	FBgn0263289	scribbled	Immune system process (GO:0002376)	Immune syst		5.03758	21.2207	15.4331	17.5724	29.7848	7.0814	10.9901	25.6485	11.7154	14.6525		OK		1	8	6	7	10	2	3	9	4	5		0	0	0	0	0	0	0	0	0	0		1	8	6	7	10	2	3	9
GB15003	GB53487	FBgn0005630	longitudinals lacking	Immune system process (GO:0002376)	Immune syst		8.01372	7.60735	3.41672	13.41	6.59219	5.00667	3.0009	10.5915	2.73925	1.793		OK		8	7	4	10	6	5	3	9	2	1		0	0	0	0	0	0	0	0	0	0		8	7	4	10	6	5	3	9
GB15155	GB48639	FBgn0004197	Serrate	Immune system process (GO:0002376)	Immune syst		13.7979	13.1251	7.50036	18.3731	39.4348	14.1608	4.85619	19.4447	5.84396	14.1997		OK		5	4	3	8	10	6	1	9	2	7		0	0	0	0	0	0	0	0	0	0		5	4	3	8	10	6	1	9
GB15156	GB53491	FBgn0005630	longitudinals lacking	Immune system process (GO:0002376)	Immune syst		11.1302	10.5658	3.42896	14.6809	25.9415	11.1259	4.287	9.09371	5.72489	11.6213		OK		7	5	1	9	10	6	2	4	3	8		0	0	0	0	0	0	0	0	0	0		7	5	1	9	10	6	2	4
GB15281	GB55293	FBgn0260934	par-1	Immune system process (GO:0002376)	Immune syst		29.3858	19.341	27.3146	26.4728	44.8653	6.65825	24.4983	10.6205	13.2857	16.9718		OK		9	5	8	7	10	1	6	2	3	4		0	0	0	0	0	0	0	0	0	0		9	5	8	7	10	1	6	2
GB15447	GB45431	FBgn0014380	rho-like	Immune system process (GO:0002376)	Immune syst		4.2273	13.5822	25.7069	22.3739	10.8335	4.46948	12.8379	10.0802	22.802	11.0588		OK		1	7	10	8	4	2	6	3	9	5		0	0	0	0	0	0	0	0	0	0		1	7	10	8	4	2	6	3
GB15719	GB50640	FBgn0086899	Tousled-like kinase	Immune system process (GO:0002376)	Immune syst		31.0881	10.3673	9.25803	10.9578	9.08597	3.25649	3.56516	9.84147	6.24198	7.66375		OK		10	8	6	9	5	1	2	7	3	4		0	0	0	0	0	0	0	0	0	0		10	8	6	9	5	1	2	7
GB15805	GB40436	FBgn0023167	Small ribonucleoprotein particle protein SmD3	Immune system process (GO:0002376)	Immune syst		85.0598	21.1563	44.5061	71.516	56.8326	12.9955	33.0247	21.422	44.2566	69.8095		OK		10	2	6	9	7	1	4	3	5	8		0	0	0	0	0	0	0	0	0	0		10	2	6	9	7	1	4	3
GB16114	GB54297	FBgn0021875	Zinc finger protein RP-8	Immune system process (GO:0002376)	Immune syst		2.3284	11.9618	12.9752	5.17708	5.4081	4.79194	7.0779	13.8235	7.70478	6.37408		OK		1	8	9	3	4	2	6	10	7	5		0	0	0	0	0	0	0	0	0	0		1	8	9	3	4	2	6	10
GB16187	GB49505	FBgn0036980	RhoBTB	Immune system process (GO:0002376)	Immune syst		3.67675	3.28499	3.45053	3.40629	4.86299	5.0446	1.01816	7.27618	1.43633	2.58084		OK		7	4	6	5	8	9	1	10	2	3		0	0	0	0	0	0	0	0	0	0		7	4	6	5	8	9	1	10
GB16396	GB41740	FBgn0021760	chromosome bows	Immune system process (GO:0002376)	Immune syst		5.29848	13.0443	9.77293	8.59699	10.7289	4.0742	4.41054	5.79256	3.70755	8.75437		OK		4	10	8	6	9	2	3	5	1	7		0	0	0	0	0	0	0	0	0	0		4	10	8	6	9	2	3	5
GB16409	GB43185	FBgn0031537	sec5	Immune system process (GO:0002376)	Immune syst		1.622	1.66459	2.04029	2.69264	1.80307	1.09553	0.802035	0.884887	1.16452	2.74633		OK		5	6	8	9	7	3	1	2	4	10		0	0	0	0	0	0	0	0	0	0		5	6	8	9	7	3	1	2
GB16431	GB52721	FBgn0002576	lozenge	Immune system process (GO:0002376)	Immune syst		19.7178	9.35895	9.39668	26.4205	25.3439	14.4747	6.01246	23.099	6.61958	14.338		OK		7	3	4	10	9	6	1	8	2	5		0	0	0	0	0	0	0	0	0	0		7	3	4	10	9	6	1	8
GB16457	GB45131	FBgn0003963	u-shaped	Immune system process (GO:0002376)	Immune syst		1.60149	1.3031	1.00061	1.21609	1.78791	0.285872	0.49568	0.4948	0.580938	0.921394		OK		9	8	6	7	10	1	3	2	4	5		0	0	0	0	0	0	0	0	0	0		9	8	6	7	10	1	3	2
GB16508	GB49120	FBgn0003079	pole hole	Immune system process (GO:0002376)	Immune syst		0.295491	0.561014	0.121921	0.261778	0.9723	1.10767	0.521648	0.426046	0.346302	0.925591		OK		3	7	1	2	9	10	6	5	4	8		0	0	0	0	0	0	0	0	0	0		3	7	1	2	9	10	6	5
GB16550	GB46540	FBgn0264294	Cytochrome b5	Immune system process (GO:0002376)	Immune syst		3.61404	10.1943	7.19171	6.09849	8.32429	9.28973	3.71205	14.888	5.36496	4.99029		OK		1	9	6	5	7	8	2	10	4	3		0	0	0	0	0	0	0	0	0	0		1	9	6	5	7	8	2	10
gb16573	GB49979	FBgn0043550	Tetraspanin 68C	Immune system process (GO:0002376)	Immune syst		4.0763	6.33205	4.587	8.09789	9.7548	15.7433	5.35249	19.2348	3.76388	5.30639		OK		2	6	3	7	8	9	5	10	1	4		0	0	0	0	0	0	0	0	0	0		2	6	3	7	8	9	5	10
GB16611	GB55798	FBgn0027491	Cdk5 activator-like protein	Immune system process (GO:0002376)	Immune syst		6.02669	15.6283	11.6933	20.4882	46.9162	16.163	9.34181	38.5725	9.70446	17.365		OK		1	5	4	8	10	6	2	9	3	7		0	0	0	0	0	0	0	0	0	0		1	5	4	8	10	6	2	9
GB16613	GB40656	FBgn0011823	Pendulin	Immune system process (GO:0002376)	Immune syst		3.85325	3.77585	5.57993	5.28562	4.08998	8.07634	4.86739	5.73492	6.65236	6.89706		OK		2	1	6	5	3	10	4	7	8	9		0	0	0	0	0	0	0	0	0	0		2	1	6	5	3	10	4	7
GB16680	GB51745	FBgn0037116	CG7158	Immune system process (GO:0002376)	Immune syst		0.922595	2.88502	1.26292	1.92314	1.16073	2.03436	0.992905	1.33022	0.720826	0.58284		OK		3	10	6	8	5	9	4	7	2	1		0	0	0	0	0	0	0	0	0	0		3	10	6	8	5	9	4	7
GB16711	GB41850	FBgn0029167	Hemolectin	Immune system process (GO:0002376)	Immune syst		1.06008	4.79941	3.57319	4.18999	5.31609	4.94178	2.21169	6.1726	1.97903	4.05039		OK		1	7	4	6	9	8	3	10	2	5		0	0	0	0	0	0	0	0	0	0		1	7	4	6	9	8	3	10
GB16736	GB48230	FBgn0050420	Activating transcription factor-2	Immune system process (GO:0002376)	Immune syst		0.880514	1.63616	1.63255	2.43421	4.13018	1.68545	0.968133	3.29541	0.790408	2.11259		OK		2	5	4	8	10	6	3	9	1	7		0	0	0	0	0	0	0	0	0	0		2	5	4	8	10	6	3	9
GB16739	GB55914	FBgn0261524	licorne	Immune system process (GO:0002376)	Immune syst		1.09934	4.17438	7.09255	2.1249	2.95963	3.49657	4.45887	2.88192	4.33363	1.60997		OK		1	7	10	3	5	6	9	4	8	2		0	0	0	0	0	0	0	0	0	0		1	7	10	3	5	6	9	4
GB16821	GB52515	FBgn0002526	Laminin A	Immune system process (GO:0002376)	Immune syst		3.60466	20.5312	22.6069	12.2413	17.7914	4.50411	35.5779	9.09523	21.1225	4.83907		OK		1	7	9	5	6	2	10	4	8	3		0	0	0	0	0	0	0	0	0	0		1	7	9	5	6	2	10	4
GB16921	GB40741	FBgn0052133	ptip	Immune system process (GO:0002376)	Immune syst		1.39711	3.78932	0.801544	2.63258	3.66675	3.15892	0.811455	10.7434	0.922631	3.27476		OK		4	9	1	5	8	6	2	10	3	7		0	0	0	0	0	0	0	0	0	0		4	9	1	5	8	6	2	10
GB17030	GB50930	FBgn0003507		Immune system process (GO:0002376)	Immune syst		11.1949	0.737146	2.66998	3.82182	5.96193	1.94057	2.13935	2.23922	3.1599	5.09639		OK		10	1	5	7	9	2	3	4	6	8		0	0	0	0	0	0	0	0	0	0		10	1	5	7	9	2	3	4
GB17138	GB51962	FBgn0086902	kismet	Immune system process (GO:0002376)	Immune syst		3.61971	2.47044	4.78314	4.41537	6.59748	4.78898	3.53866	10.9837	4.61644	7.98234		OK		3	1	6	4	8	7	2	10	5	9		0	0	0	0	0	0	0	0	0	0		3	1	6	4	8	7	2	10
GB17192	GB52973	FBgn0260866	defense repressor 1	Immune system process (GO:0002376)	Immune syst		1.95704	3.23095	2.62607	4.7741	4.96964	11.6952	3.15445	15.5807	2.69243	6.54901		OK		1	5	2	6	7	9	4	10	3	8		0	0	0	0	0	0	0	0	0	0		1	5	2	6	7	9	4	10
GB17303	GB49949	FBgn0035850	Autophagy-specific gene 18	Immune system process (GO:0002376)	Immune syst		2.72436	8.09595	8.32798	6.29616	8.18486	4.73621	5.77897	5.46509	4.39591	7.42062		OK		1	8	10	6	9	3	5	4	2	7		0	0	0	0	0	0	0	0	0	0		1	8	10	6	9	3	5	4
GB17556	GB54853	FBgn0032006	PDGF- and VEGF-receptor related	Immune system process (GO:0002376)	Immune syst		2.90485	3.30906	2.14142	3.20249	7.16871	6.29146	0.808066	7.25968	0.832175	3.81296		OK		4	6	3	5	9	8	1	10	2	7		0	0	0	0	0	0	0	0	0	0		4	6	3	5	9	8	1	10
GB17628	GB46302	FBgn0262738	no receptor potential A	Immune system process (GO:0002376)	Immune syst		0.995012	6.04515	1.80641	2.99706	5.23846	3.48122	1.50106	6.31237	0.796841	3.47296		OK		2	9	4	5	8	7	3	10	1	6		0	0	0	0	0	0	0	0	0	0		2	9	4	5	8	7	3	10
GB17687	GB55584	FBgn0016794	daughter of sevenless	Immune system process (GO:0002376)	Immune syst		1.43615	2.89706	3.6887	8.85306	44.9669	2.24313	0.907531	44.5195	0.701293	1.36564		OK		4	6	7	8	10	5	2	9	1	3		0	0	0	0	0	0	0	0	0	0		4	6	7	8	10	5	2	9
GB17764	GB40429	FBgn0015790	Rab-protein 11	Immune system process (GO:0002376)	Immune syst		60.6572	26.7396	53.7793	24.5761	17.6418	6.39938	33.0826	8.30725	52.2058	35.8088		OK		10	5	9	4	3	1	6	2	8	7		0	0	0	0	0	0	0	0	0	0		10	5	9	4	3	1	6	2
GB17971	GB51743	FBgn0000490	decapentaplegic	Immune system process (GO:0002376)	Immune syst		0.568476	0.863439	1.27598	1.20868	3.55404	1.13652	0.21896	0.98357	1.11038	0.61052		OK		2	4	9	8	10	7	1	5	6	3		0	0	0	0	0	0	0	0	0	0		2	4	9	8	10	7	1	5
GB18039	GB45082	FBgn0015296	SHC-adaptor protein	Immune system process (GO:0002376)	Immune syst		1.80697	1.77067	1.50075	1.65244	4.98674	0.582671	1.02901	2.68936	1.13854	2.08667		OK		7	6	4	5	10	1	2	9	3	8		0	0	0	0	0	0	0	0	0	0		7	6	4	5	10	1	2	9
GB18366	GB41829	FBgn0034366	Autophagy-specific gene 7	Immune system process (GO:0002376)	Immune syst		0.741678	0.866545	3.25793	2.29128	5.35023	0.855457	1.72135	1.97422	2.96424	3.36994		OK		1	3	8	6	10	2	4	5	7	9		0	0	0	0	0	0	0	0	0	0		1	3	8	6	10	2	4	5
GB18378	GB43282	FBgn0004435	G protein alpha49B	Immune system process (GO:0002376)	Immune syst		9.26489	56.4786	101.565	27.6257	35.7589	24.7804	162.176	46.2126	74.4606	19.9899		OK		1	7	9	4	5	3	10	6	8	2		0	0	0	0	0	0	0	0	0	0		1	7	9	4	5	3	10	6
GB18613	GB52625	FBgn0003118	pointed	Immune system process (GO:0002376)	Immune syst		61.0811	19.3958	28.7764	63.8851	98.0206	9.01066	16.6846	11.0163	16.2486	34.7278		OK		8	5	6	9	10	1	4	2	3	7		0	0	0	0	0	0	0	0	0	0		8	5	6	9	10	1	4	2
GB18619	GB50333	FBgn0261592	Ribosomal protein S6	Immune system process (GO:0002376)	Immune syst		2065.78	585.952	595.099	678.191	398.472	149.219	212.437	65.6446	673.242	963.562		OK		10	5	6	8	4	2	3	1	7	9		0	0	0	0	0	0	0	0	0	0		10	5	6	8	4	2	3	1
GB18627	GB48763	FBgn0000022	achaete	Immune system process (GO:0002376)	Immune syst		1.36207	2.87332	0.19982	0.536295	3.98383	6.80774	0.194306	7.41901	0.295607	1.35445		OK		6	7	2	4	8	9	1	10	3	5		0	0	0	0	0	0	0	0	0	0		6	7	2	4	8	9	1	10
GB18643	GB47453	FBgn0261797	Dynein heavy chain 64C	Immune system process (GO:0002376)	Immune syst		1.90978	5.6599	1.76816	7.26274	25.7492	4.65623	1.13628	5.64145	0.928024	1.75087		OK		5	8	4	9	10	6	2	7	1	3		0	0	0	0	0	0	0	0	0	0		5	8	4	9	10	6	2	7
GB18722	GB54764	FBgn0026404	Nedd2-like caspase	Immune system process (GO:0002376)	Immune syst		36.6852	116.182	122.019	82.6091	60.6123	11.7036	58.1235	23.4082	81.474	39.9572		OK		3	9	10	8	6	1	5	2	7	4		0	0	0	0	0	0	0	0	0	0		3	9	10	8	6	1	5	2
GB18769	GB55827	FBgn0015521	Ribosomal protein S21	Immune system process (GO:0002376)	Immune syst		2919.35	599.972	431.293	1050.41	526.321	89.9119	121.544	43.2287	240.224	315.555		OK		10	8	6	9	7	2	3	1	4	5		0	0	0	0	0	0	0	0	0	0		10	8	6	9	7	2	3	1
GB18813	GB51292	FBgn0260642	Antennapedia	Immune system process (GO:0002376)	Immune syst		16.8058	20.5118	11.0451	31.5492	41.9678	27.7491	7.1281	108.607	9.08579	12.0862		OK		5	6	3	8	9	7	1	10	2	4		0	0	0	0	0	0	0	0	0	0		5	6	3	8	9	7	1	10
GB18882	GB42706	FBgn0011766		Immune system process (GO:0002376)	Immune syst		2.05264	3.37362	2.22477	2.53317	4.08272	5.35934	1.39636	7.24426	1.86704	4.82567		OK		3	6	4	5	7	9	1	10	2	8		0	0	0	0	0	0	0	0	0	0		3	6	4	5	7	9	1	10
GB18918	GB49657	FBgn0004606	Zn finger homeodomain 1	Immune system process (GO:0002376)	Immune syst		30.332	192.407	286.327	219.909	297.902	30.4621	240.801	64.9868	153.403	61.2689		OK		1	6	9	7	10	2	8	4	5	3		0	0	0	0	0	0	0	0	0	0		1	6	9	7	10	2	8	4
GB18989	GB42321	FBgn0000543	ecdysoneless	Immune system process (GO:0002376)	Immune syst		0.255265	12.2776	3.93209	5.22638	6.01956	8.9309	1.25632	14.9673	2.82539	4.26447		OK		1	9	4	6	7	8	2	10	3	5		0	0	0	0	0	0	0	0	0	0		1	9	4	6	7	8	2	10
GB19031	GB46056	FBgn0032209	Hand	Immune system process (GO:0002376)	Immune syst		7.04087	12.6641	5.3413	4.23133	4.0645	1.23477	1.46698	11.0422	2.36449	13.0449		OK		7	9	6	5	4	1	2	8	3	10		0	0	0	0	0	0	0	0	0	0		7	9	6	5	4	1	2	8
GB19155	GB49172	FBgn0000541	Enhancer of bithorax	Immune system process (GO:0002376)	Immune syst		2.10275	32.69	4.02869	20.6802	22.236	113.322	3.56049	56.8569	3.3691	4.99109		OK		1	8	4	6	7	10	3	9	2	5		0	0	0	0	0	0	0	0	0	0		1	8	4	6	7	10	3	9
GB19160	GB45689	FBgn0038760	Mediator complex subunit 25	Immune system process (GO:0002376)	Immune syst		12.1672	1.431	2.29244	2.28936	1.94864	3.76719	3.12776	4.03644	3.23887	3.56551		OK		10	1	4	3	2	8	5	9	6	7		0	0	0	0	0	0	0	0	0	0		10	1	4	3	2	8	5	9
GB19168	GB47837	FBgn0011764	Dorsal switch protein 1	Immune system process (GO:0002376)	Immune syst		7.87773	3.9884	6.93416	6.51367	10.3685	6.56228	8.76564	9.08662	10.053	9.87041		OK		5	1	4	2	10	3	6	7	9	8		0	0	0	0	0	0	0	0	0	0		5	1	4	2	10	3	6	7
GB19246	GB44931	FBgn0028436	ECSIT	Immune system process (GO:0002376)	Immune syst		1.82725	7.63218	11.8216	6.47508	3.00623	1.82655	9.20804	1.58074	24.8408	6.54129		OK		3	7	9	5	4	2	8	1	10	6		0	0	0	0	0	0	0	0	0	0		3	7	9	5	4	2	8	1
GB19301	GB47805	FBgn0043575	PGRP-SC2	Immune system process (GO:0002376)	Immune syst		15.3791	8.63257	5.56195	27.0119	40.0432	2.6736	4.33535	6.17012	1.09709	2.87243		OK		8	7	5	9	10	2	4	6	1	3		0	0	0	0	0	0	0	0	0	0		8	7	5	9	10	2	4	6
GB19311	GB49159	FBgn0031145	Nuclear transport factor-2	Immune system process (GO:0002376)	Immune syst		6.5236	1.5482	2.15333	5.7793	5.3664	0	1.57043	1.17573	10.0345	10.947		OK		8	3	5	7	6	1	4	2	9	10		0	0	0	0	0	0	0	0	0	0		8	3	5	7	6	1	4	2
GB19423	GB45127	FBgn0028541	TM9SF4	Immune system process (GO:0002376)	Immune syst		1.34194	0.727939	1.83509	1.20771	3.25913	0.319389	1.1281	0.737083	0.94861	0.915042		OK		8	2	9	7	10	1	6	3	5	4		0	0	0	0	0	0	0	0	0	0		8	2	9	7	10	1	6	3
GB19455	GB43567	FBgn0020377	Scavenger receptor class C, type II	Immune system process (GO:0002376)	Immune syst		2.27042	4.92637	7.14251	5.14475	6.17476	2.08429	2.79601	2.13782	3.96409	2.15635		OK		4	7	10	8	9	1	5	2	6	3		0	0	0	0	0	0	0	0	0	0		4	7	10	8	9	1	5	2
GB19525	GB47743	FBgn0261854	atypical protein kinase C	Immune system process (GO:0002376)	Immune syst		9.28188	5.40249	5.41196	12.8845	22.6275	5.75664	4.06656	11.9175	4.04945	4.3657		OK		7	4	5	9	10	6	2	8	1	3		0	0	0	0	0	0	0	0	0	0		7	4	5	9	10	6	2	8
GB19541	GB47201	FBgn0004657	myospheroid	Immune system process (GO:0002376)	Immune syst		2.9268	5.02756	4.16339	7.49054	8.14007	2.43808	1.9907	5.02373	5.22679	4.73985		OK		3	7	4	9	10	2	1	6	8	5		0	0	0	0	0	0	0	0	0	0		3	7	4	9	10	2	1	6
GB19783	GB45615	FBgn0029167	Hemolectin	Immune system process (GO:0002376)	Immune syst		1.54586	2.34795	0.510262	0.365196	0	0	1.48854	4.4577	1.44934	0		OK		8	9	5	4	1	1	7	10	6	1		0	0	0	0	1	1	0	0	0	1		8	9	5	4	2	2	7	10
GB19857	GB46039	FBgn0003884	alpha-Tubulin at 84B	Immune system process (GO:0002376)	Immune syst		601.431	444.342	246.584	209.685	184.568	71.431	55.185	26.0286	21.4926	193.493		OK		10	9	8	7	5	4	3	2	1	6		0	0	0	0	0	0	0	0	0	0		10	9	8	7	5	4	3	2
GB19881	GB42786	FBgn0027066	Eb1	Immune system process (GO:0002376)	Immune syst		5.1281	2.78175	3.62722	8.22071	29.9309	3.66154	2.58656	10.5626	4.43588	5.24512		OK		6	2	3	8	10	4	1	9	5	7		0	0	0	0	0	0	0	0	0	0		6	2	3	8	10	4	1	9
GB19884	GB46165	FBgn0010389	heartless	Immune system process (GO:0002376)	Immune syst		2.85163	2.32031	3.3617	2.88718	2.45749	2.71481	1.98315	3.1326	1.72404	1.94446		OK		7	4	10	8	5	6	3	9	1	2		0	0	0	0	0	0	0	0	0	0		7	4	10	8	5	6	3	9
GB19895	GB50933	FBgn0003117	pannier	Immune system process (GO:0002376)	Immune syst		5.21727	5.72312	13.7771	8.35387	10.3003	4.63581	30.143	7.02088	22.7818	15.7718		OK		2	3	7	5	6	1	10	4	9	8		0	0	0	0	0	0	0	0	0	0		2	3	7	5	6	1	10	4
GB19906	GB45031	FBgn0014179	glial cells missing	Immune system process (GO:0002376)	Immune syst		1.59669	5.81028	1.60309	5.02941	5.91058	7.64792	1.00364	13.8129	1.14354	3.69155		OK		3	7	4	6	8	9	1	10	2	5		0	0	0	0	0	0	0	0	0	0		3	7	4	6	8	9	1	10
GB19961	GB42981	FBgn0040323	Gram-negative bacteria binding protein 1	Immune system process (GO:0002376)	Immune syst		1.48971	13.1989	2.72091	9.15026	9.31349	7.44574	3.44276	12.0283	1.4355	3.55531		OK		2	10	3	7	8	6	4	9	1	5		0	0	0	0	0	0	0	0	0	0		2	10	3	7	8	6	4	9
GB19984	GB45510	FBgn0004009	wingless	Immune system process (GO:0002376)	Immune syst		6.04483	4.80924	3.24949	5.71217	6.63008	1.72644	1.53371	4.81432	2.00159	3.50357		OK		9	6	4	8	10	2	1	7	3	5		0	0	0	0	0	0	0	0	0	0		9	6	4	8	10	2	1	7
GB11057	GB47454	FBgn0015247	Iap2	Imd-Pathway_peptidoglycan recognition protein signaling pathway ; GO:0061057	Imd-Pathway		2.41847	1.77742	4.66103	2.67242	1.54023	2.33957	2.97987	2.92458	4.60199	3.49105		OK		4	2	10	5	1	3	7	6	9	8		0	0	0	0	0	0	0	0	0	0		4	2	10	5	1	3	7	6
GB15371	GB47804	FBgn0037906	PGRP-LB	Imd-Pathway_peptidoglycan recognition protein signaling pathway ; GO:0061057	Imd-Pathway		0.471104	0.596286	1.29586	5.37923	20.6686	0.784875	1.31051	1.81133	1.4723	1.96757		OK		1	2	4	9	10	3	5	7	6	8		0	0	0	0	0	0	0	0	0	0		1	2	4	9	10	3	5	7
GB15528	GB44455	FBgn0034647	pirk	Imd-Pathway_peptidoglycan recognition protein signaling pathway ; GO:0061057	Imd-Pathway		7.96881	5.85655	1.27276	9.41283	10.1501	1.2848	1.07262	5.93011	0.803361	5.06128		OK		8	6	3	9	10	4	2	7	1	5		0	0	0	0	0	0	0	0	0	0		8	6	3	9	10	4	2	7
GB16425	GB45352	FBgn0020381	Dredd	Imd-Pathway_peptidoglycan recognition protein signaling pathway ; GO:0061057	Imd-Pathway		0.875391	3.02182	5.30622	3.66607	2.48765	1.19326	2.29891	2.52432	2.17619	1.282		OK		1	8	10	9	6	2	5	7	4	3		0	0	0	0	0	0	0	0	0	0		1	8	10	9	6	2	5	7
GB17188	GB42500	FBgn0035976	PGRP-LC	Imd-Pathway_peptidoglycan recognition protein signaling pathway ; GO:0061057	Imd-Pathway		0.678669	13.9159	2.509	7.13469	8.7092	5.08808	2.15657	9.58949	1.32561	1.94363		OK		1	10	5	7	8	6	4	9	2	3		0	0	0	0	0	0	0	0	0	0		1	10	5	7	8	6	4	9
GB17514	GB48951	FBgn0034068	casp	Imd-Pathway_peptidoglycan recognition protein signaling pathway ; GO:0061057	Imd-Pathway		3.38899	4.21153	10.617	4.00311	6.28529	3.07973	3.38201	4.97517	6.0178	4.52198		OK		3	5	10	4	9	1	2	7	8	6		0	0	0	0	0	0	0	0	0	0		3	5	10	4	9	1	2	7
GB18606	GB45648	FBgn0013983	imd	Imd-Pathway_peptidoglycan recognition protein signaling pathway ; GO:0061057	Imd-Pathway		2.0334	0	3.22172	1.20093	2.00724	1.01631	1.30534	1.17272	0.794349	1.81982		OK		9	1	10	5	8	3	6	4	2	7		0	0	0	0	0	0	0	0	0	0		9	1	10	5	8	3	6	4
GB14664	GB48187	FBgn0026323	Tak1	Imd-Pathway	Imd-Pathway		20.0578	8.46251	12.23	17.879	11.7637	6.49773	6.82551	10.1755	12.624	12.7984		OK		10	3	6	9	5	1	2	4	7	8		0	0	0	0	0	0	0	0	0	0		10	3	6	9	5	1	2	4
GB17106	GB49918	not found	IKKgamma-kenny	Imd-Pathway	Imd-Pathway		180.977	238.275	164.473	279.192	351.462	220.908	107.567	285.063	89.5993	181.99		OK		4	7	3	8	10	6	2	9	1	5		0	0	0	0	0	0	0	0	0	0		4	7	3	8	10	6	2	9
GB18650	GB41606	FBgn0086358	Tab	Imd-Pathway	Imd-Pathway		21.0599	22.5636	67.4675	38.9142	39.6803	6.55143	112.643	17.1353	150.614	45.9858		OK		3	4	8	5	6	1	9	2	10	7		0	0	0	0	0	0	0	0	0	0		3	4	8	5	6	1	9	2
GB19498	GB45752	FBgn0000173	dUbc13	Imd-Pathway	Imd-Pathway		3.84132	2.28457	2.42898	2.73338	4.26399	1.3879	0.727896	3.06953	1.62718	2.73371		OK		9	4	5	6	10	2	1	8	3	7		0	0	0	0	0	0	0	0	0	0		9	4	5	6	10	2	1	8
GB30399	GB55968	not found		Imd-Pathway	Imd-Pathway		1.54285	3.51507	9.98168	6.19626	16.2454	0	6.53684	5.33883	3.73684	1.65696		OK		2	4	9	7	10	1	8	6	5	3		0	0	0	0	0	0	0	0	0	0		2	4	9	7	10	1	8	6
GB10469	GB52343	FBgn0037107		IG Superfamily Genes	IG Superfam		6.7645	10.9593	11.2089	8.78932	9.49686	4.05716	7.10717	4.29141	5.58461	7.50695		OK		4	9	10	7	8	1	5	2	3	6		0	0	0	0	0	0	0	0	0	0		4	9	10	7	8	1	5	2
GB10912	GB53701	not found		IG Superfamily Genes	IG Superfam		11.9572	45.7514	10.2679	36.1217	32.1842	232.986	8.27147	90.8247	9.33326	19.6805		OK		4	8	3	7	6	10	1	9	2	5		0	0	0	0	0	0	0	0	0	0		4	8	3	7	6	10	1	9
GB11115	GB47239	FBgn0029082		IG Superfamily Genes	IG Superfam		1.90252	1.93819	0.96496	2.13765	3.43544	4.4066	0.774495	9.36665	0.54382	2.82397		OK		4	5	3	6	8	9	2	10	1	7		0	0	0	0	0	0	0	0	0	0		4	5	3	6	8	9	2	10
GB11358	GB55483	FBgn0005666		IG Superfamily Genes	IG Superfam		260.581	63.965	60.2156	78.3355	54.4815	34.7572	44.8532	32.9679	114.216	103.526		OK		10	6	5	7	4	2	3	1	9	8		0	0	0	0	0	0	0	0	0	0		10	6	5	7	4	2	3	1
GB11807	GB53012	FBgn0010473		IG Superfamily Genes	IG Superfam		38.2229	23.6672	29.379	51.6935	61.3077	16.841	19.0441	20.8153	8.54287	50.8474		OK		7	5	6	9	10	2	3	4	1	8		0	0	0	0	0	0	0	0	0	0		7	5	6	9	10	2	3	4
GB11846	GB44650	FBgn0002968	Neuroglian	IG Superfamily Genes	IG Superfam		2.71395	26.1999	37.0327	25.2928	18.7305	8.96642	5.10115	4.90787	4.45646	3.70509		OK		1	9	10	8	7	6	5	4	3	2		0	0	0	0	0	0	0	0	0	0		1	9	10	8	7	6	5	4
GB11918	GB49767	not found		IG Superfamily Genes	IG Superfam		8.23647	9.47734	7.59849	11.0217	18.2258	14.0101	4.71429	16.9413	5.31015	13.265		OK		4	5	3	6	10	8	1	9	2	7		0	0	0	0	0	0	0	0	0	0		4	5	3	6	10	8	1	9
GB12490	GB53013	FBgn0028482		IG Superfamily Genes	IG Superfam		28.624	7.72114	8.5706	10.716	10.0362	3.12711	4.09173	6.31464	3.91064	9.65904		OK		10	5	6	9	8	1	3	4	2	7		0	0	0	0	0	0	0	0	0	0		10	5	6	9	8	1	3	4
GB12933	GB40916	not found		IG Superfamily Genes	IG Superfam		5.82291	28.691	12.7221	28.3721	29.5954	61.152	8.54402	67.6645	7.31162	24.3814		OK		1	7	4	6	8	9	3	10	2	5		0	0	0	0	0	0	0	0	0	0		1	7	4	6	8	9	3	10
GB13261	GB44117	FBgn0000547		IG Superfamily Genes	IG Superfam		11.5921	132.734	4.53824	43.0417	15.3016	950.37	6.6195	397.372	3.98435	9.16818		OK		5	8	2	7	6	10	3	9	1	4		0	0	0	0	0	0	0	0	0	0		5	8	2	7	6	10	3	9
GB14317	GB49171	FBgn0021764		IG Superfamily Genes	IG Superfam		3.60366	8.3437	5.14245	7.42323	16.232	7.57799	3.49121	14.5103	3.85421	5.74234		OK		2	8	4	6	10	7	1	9	3	5		0	0	0	0	0	0	0	0	0	0		2	8	4	6	10	7	1	9
GB14520	GB46360	FBgn0000635		IG Superfamily Genes	IG Superfam		7.51449	18.9445	21.4901	65.3345	96.6748	11.6984	8.12553	17.0511	6.25608	12.5684		OK		2	7	8	9	10	4	3	6	1	5		0	0	0	0	0	0	0	0	0	0		2	7	8	9	10	4	3	6
GB14642	GB47977	FBgn0086906		IG Superfamily Genes	IG Superfam		24.539	35.4249	43.5007	64.0995	45.0915	47.0208	39.0813	34.3017	118.731	62.3628		OK		1	3	5	9	6	7	4	2	10	8		0	0	0	0	0	0	0	0	0	0		1	3	5	9	6	7	4	2
GB15344	GB41645	FBgn0000464		IG Superfamily Genes	IG Superfam		34.1484	37.3333	33.9845	48.9919	55.5732	22.6858	19.2361	27.7772	17.2032	39.4499		OK		6	7	5	9	10	3	2	4	1	8		0	0	0	0	0	0	0	0	0	0		6	7	5	9	10	3	2	4
GB15987	GB45774	FBgn0259141		IG Superfamily Genes	IG Superfam		8.33982	15.0449	7.4503	14.6539	21.0452	24.5501	5.52521	30.5106	4.27825	12.1653		OK		4	7	3	6	8	9	2	10	1	5		0	0	0	0	0	0	0	0	0	0		4	7	3	6	8	9	2	10
GB16060	GB46759	FBgn0037736		IG Superfamily Genes	IG Superfam		31.4732	381.523	717.524	190.597	321.93	196.289	4577.68	317.387	1740.86	347.289		OK		1	7	8	2	5	3	10	4	9	6		0	0	0	0	0	0	0	0	0	0		1	7	8	2	5	3	10	4
GB30209	GB44159	not found		IG superfamily genes	IG superfam		80.1334	42.556	26.4106	88.7175	83.0236	11.1423	20.1135	7.36358	32.0722	55.6103		OK		8	6	4	10	9	2	3	1	5	7		0	0	0	0	0	0	0	0	0	0		8	6	4	10	9	2	3	1
GB11717	GB49260	FBgn0061354	CTL1	C-lectin domain	C-lectin do		14.0364	2.70177	1.40917	89.8526	6.4916	9.6989	8.65771	11.9376	50.5124	60.9001		OK		7	2	1	10	3	5	4	6	8	9		0	0	0	0	0	0	0	0	0	0		7	2	1	10	3	5	4	6
GB11792	GB55225	FBgn0001083	CTL6	C-lectin domain	C-lectin do		1.97331	7.76059	2.96601	7.07593	8.87002	6.34038	2.26208	8.23065	1.07372	3.46902		OK		2	8	4	7	10	6	3	9	1	5		0	0	0	0	0	0	0	0	0	0		2	8	4	7	10	6	3	9
GB11810	GB44210	FBgn0037240	CTL10	C-lectin domain	C-lectin do		1.67873	3.7184	1.45457	3.13964	4.66069	5.06923	1.20114	9.27831	1.01102	3.81861		OK		4	6	3	5	8	9	2	10	1	7		0	0	0	0	0	0	0	0	0	0		4	6	3	5	8	9	2	10
GB13808	GB43983	FBgn0030617	CTL12	C-lectin domain	C-lectin do		4.51209	9.98406	6.09677	11.4647	17.7307	13.953	6.25151	19.6573	3.6014	12.6665		OK		2	5	3	6	9	8	4	10	1	7		0	0	0	0	0	0	0	0	0	0		2	5	3	6	9	8	4	10
GB14265	GB45248	FBgn0032180	CTL2	C-lectin domain	C-lectin do		3.818	4.90519	2.9185	6.88347	5.95087	4.30438	1.78754	10.0992	2.0298	7.81024		OK		4	6	3	8	7	5	1	10	2	9		0	0	0	0	0	0	0	0	0	0		4	6	3	8	7	5	1	10
GB14382	GB51399	FBgn0013997	CTL8	C-lectin domain	C-lectin do		2.1295	4.20474	3.28963	2.91784	3.36336	4.5412	1.0754	9.08825	1.58614	3.10014		OK		3	8	6	4	7	9	1	10	2	5		0	0	0	0	0	0	0	0	0	0		3	8	6	4	7	9	1	10
GB14975	GB52656	FBgn0031629	CTL7	C-lectin domain	C-lectin do		145.331	140.785	67.3109	53.5273	97.5234	48.0438	34.8938	56.0976	44.7036	64.7257		OK		10	9	7	4	8	3	1	5	2	6		0	0	0	0	0	0	0	0	0	0		10	9	7	4	8	3	1	5
GB15050	GB47095	not found	CTL9	C-lectin domain	C-lectin do		0.59514	9.03938	4.71471	4.21791	5.38527	1.48729	4.87114	6.00661	8.13724	7.98945		OK		1	10	4	3	6	2	5	7	9	8		0	0	0	0	0	0	0	0	0	0		1	10	4	3	6	2	5	7
GB17330	GB40445	FBgn0031918	CTL5	C-lectin domain	C-lectin do		71.477	207.301	191.269	407.444	190.384	43.7322	80.2189	31.9832	237.342	207.349		OK		3	7	6	10	5	2	4	1	9	8		0	0	0	0	0	0	0	0	0	0		3	7	6	10	5	2	4	1
GB18049	GB46626	FBgn0035199	CTL3	C-lectin domain	C-lectin do		15.3014	54.7499	10.7814	48.6612	84.237	141.19	10.0116	211.285	6.09247	75.845		OK		4	6	3	5	8	9	2	10	1	7		0	0	0	0	0	0	0	0	0	0		4	6	3	5	8	9	2	10
GB19013	GB43691	FBgn0038017	CTL11	C-lectin domain	C-lectin do		116.048	78.5542	33.4278	4.88728	7.13131	2.95425	7.01963	1.70445	2.38601	8.1112		OK		10	9	8	4	6	3	5	1	2	7		0	0	0	0	0	0	0	0	0	0		10	9	8	4	6	3	5	1
GB20122	GB47938	FBgn0031879	CTL4	C-lectin domain	C-lectin do		7.00442	3.3707	2.71951	5.88169	6.321	1.66378	1.48695	2.75976	2.04273	3.52537		OK		10	6	4	8	9	2	1	5	3	7		0	0	0	0	0	0	0	0	0	0		10	6	4	8	9	2	1	5
GB10036	GB47618	FBgn0010385	Defensin-2	Antimicrobial peptide - AMP	Antimicrobi		0.506725	1.92412	0.167262	0.598549	0.833677	0	0.162646	2.92243	0.791811	0		OK		5	9	4	6	8	1	3	10	7	1		0	0	0	0	0	0.5	0	0	0	0.5		5	9	4	6	8	1.5	3	10
GB17538	GB51223	not found	Hymenoptaecin	Antimicrobial peptide - AMP	Antimicrobi		6.18515	22.6472	11.5935	17.743	30.8913	26.4977	52.9643	107.652	1.63959	6.32628		OK		2	6	4	5	8	7	9	10	1	3		0	0	0	0	0	0	0	0	0	0		2	6	4	5	8	7	9	10
GB17782	GB47546	not found	Apidaecin	Antimicrobial peptide - AMP	Antimicrobi		29.8294	33.7038	26.3686	27.1565	76.8459	46.5452	65.8537	160.705	0.454747	0.781354		OK		5	6	3	4	9	7	8	10	1	2		0	0	0	0	0	0	0	0	0	0		5	6	3	4	9	7	8	10
GB18323	GB47318	not found	abaecin	Antimicrobial peptide - AMP	Antimicrobi		46.5902	150.562	8.83455	21.0764	68.497	29.7271	383.084	457.36	4.2597	1.77432		OK		6	8	3	4	7	5	9	10	2	1		0	0	0	0	0	0	0	0	0	0		6	8	3	4	7	5	9	10
GB19392	GB41428	FBgn0010385	Defensin-1	Antimicrobial peptide - AMP	Antimicrobi		2.56945	68.2962	2.00468	5.51828	13.4506	4.66995	31.1147	111.141	0.0912507	1.67241		OK		4	9	3	6	7	5	8	10	1	2		0	0	0	0	0	0	0	0	0	0		4	9	3	6	7	5	8	10
GB19468	GB53576	not found	apisimin	Antimicrobial peptide - AMP	Antimicrobi		16.0359	14.2713	3.88718	33.74	24.7337	2.50466	2.81483	520.22	1.85976	21.9758		OK		6	5	4	9	8	2	3	10	1	7		0	0	0	0	0	0	0	0	0	0		6	5	4	9	8	2	3	10
GB10896	GB53625	FBgn0051997	Vago	Vago orthologue	Vago orthol		138.514	536.168	983.357	44.622	34.9163	17.6789	87.5566	12.2398	16.9683	128.65		OK		8	9	10	5	4	3	6	1	2	7		0	0	0	0	0	0	0	0	0	0		8	9	10	5	4	3	6	1
GB12654	GB48208	FBgn0262739	AGO1 argonaute 1	RNAi	RNAi		3.95	9.59382	6.61312	13.4089	19.2617	17.6082	5.4369	12.6218	3.65611	5.15935		OK		2	6	5	8	10	9	4	7	1	3		0	0	0	0	0	0	0	0	0	0		2	6	5	8	10	9	4	7
GB19288	GB48923	FBgn0034246	Dicer-2	RNAi	RNAi		0.829603	3.72289	5.36059	4.27608	3.35017	5.90553	3.58269	6.88686	5.1559	3.82482		OK		1	4	8	6	2	9	3	10	7	5		0	0	0	0	0	0	0	0	0	0		1	4	8	6	2	9	3	10
GB19389	GB49909	FBgn0250816	argonaute 3	RNAi	RNAi		0.622591	3.74312	0.856279	2.57393	2.4754	3.11177	0.682772	4.93716	0.5067	0.928662		OK		2	9	4	7	6	8	3	10	1	5		0	0	0	0	0	0	0	0	0	0		2	9	4	7	6	8	3	10
[truncated: 18 more columns]

## Sheet: Fig. S9
	0 vs 1 mite	0 vs 3 mites	1 vs 3 mites
Toll_pathwa	9	10	0
TEP - Thioe	0	1	0
serine prot	8	18	0
Scav. Recep	1	2	0
PPO - melan	0	1	0
Lysozyme	0	0	0
JNK cascade	4	6	0
JAK-STAT ca	5	3	0
Imd-Pathway	1	1	0
IG Superfam	7	3	0
C-lectin do	6	3	0
Antimicrobi	0	0	0
RNAi	2	1	0
immune-rela	2	4	0
Immune syst	42	25	0
tot	87	78	0

## Sheet: reference parameters
Pparameters to be used for filtering data
False discovery rate BH correction (McDonald, 2009)	0.1

## Sheet: sample IDs & DWV
	sample	mite	DWV reads	total reads	prop of DWV reads
2	G1	no	21666267	27338758	0.792511
3	G2	no	130271	18225222	0.00714784
4	G3	no	86055	24683141	0.00348639
5	G4	no	60781	19927120	0.00305016
6	G5	no	69785	16706666	0.00417708
7	H1	one	15739546	26007148	0.605201
8	H2	one	18724222	27712817	0.675652
9	H3	one	288350	10804739	0.0266874
10	H4	one	9257163	15344334	0.603295
11	H5	one	83935	27732490	0.00302659
12	I1	three	16777777	21260599	0.789149
13	I2	three	2860322	33012513	0.0866436
14	I3	three	24407343	30313176	0.805173
15	I4	three	190506	25472838	0.00747879
16	I5	three	17718783	24363190	0.727277

## Sheet: outlier treatment
	2
							no mite					one mite					three mites									no mite					one mite					three mites
Apis mellifera OGS1 (2008 version)	Apis mellifera OGS3.1 BEEBASE	FBgn ortholog	Gene Product	GO term / Pathway			G1	G2	G3	G4	G5	H1	H2	H3	H4	H5	I1	I2	I3	I4	I5		mean	standard deviation		G1	G2	G3	G4	G5	H1	H2	H3	H4	H5	I1	I2	I3	I4	I5
GB10023	GB52350	FBgn0036448	myopic	Toll_pathway_Toll signaling pathway ; GO:0008063 and children	Toll_pathwa		3.92429	1.73873	0.687643	1.09977	0.478343	0.797901	12.4557	1.81435	4.29356	2.4796	27.0297	1.93502	22.2417	1.59314	0.63475		5.54694	8.34284												?		?
GB10539	GB54845	FBgn0026318	TNF-receptor-associated factor 6	Toll_pathway_Toll signaling pathway ; GO:0008063 and children	Toll_pathwa		0	0.47189	0.453235	0.326193	0.0919574	0	0.388297	0.607577	1.2079	0.336481	1.02221	0.164114	1.4744	0.878854	0.549114		0.531482	0.440589														?
GB10655	GB44055	FBgn0000250	cactus	Toll_pathway_Toll signaling pathway ; GO:0008063 and children	Toll_pathwa		26.4943	1.02481	0.917186	0.94453	0.798821	0.969073	2.75979	2.39906	4.38793	6.37738	19.7777	1.96997	30.7391	0.820234	5.49282		7.05818	10.0111														?
GB11090	GB47167	FBgn0026318	TNF-receptor-associated factor 6	Toll_pathway_Toll signaling pathway ; GO:0008063 and children	Toll_pathwa		4.49496	0.497892	0.298881	0.0764814	0	0.215789	0	0.569828	0.254892	1.42009	0	0.415577	0	0.168597	0		0.560865	1.14901		?
GB11883	GB53302	FBgn0000250	cactus	Toll_pathway_Toll signaling pathway ; GO:0008063 and children	Toll_pathwa		6.04471	2.94603	3.5241	2.04055	2.42163	1.57862	5.28907	9.28743	4.49717	3.51384	6.03361	4.38144	5.08773	4.02663	4.65396		4.3551	1.92382									?
GB12279	GB55279	FBgn0028990	Serpin 27A	Toll_pathway_Toll signaling pathway ; GO:0008063 and children	Toll_pathwa		12.3657	0.587017	0.375874	0.520993	0.372834	0.113074	2.00368	1.39342	2.27059	6.13906	2.26062	0.810562	4.23884	1.00124	1.28183		2.38235	3.20564		?
GB12344	GB51498	FBgn0033402	Myd88	Toll_pathway_Toll signaling pathway ; GO:0008063 and children	Toll_pathwa		0.215878	0.526066	1.26317	0.7934	0.782839	0.497454	1.25928	2.57249	1.07726	0.954829	0.828775	2.02249	1.1954	1.26315	1.33561		1.10587	0.593164									?
GB13429	GB47680	FBgn0022787	Helicase 89B	Toll_pathway_Toll signaling pathway ; GO:0008063 and children	Toll_pathwa		5.63486	1.18815	0.772825	0.693086	0.867525	1.61656	1.58408	1.58358	2.74104	3.30305	1.95477	0.77831	4.5112	1.20191	1.44676		1.99185	1.46021		?
GB13503	GB52103	FBgn0003495	spatzle	Toll_pathway_Toll signaling pathway ; GO:0008063 and children	Toll_pathwa		3.51468	0.389309	0.623198	0.39868	0.303459	0.224972	2.56276	1.26241	1.06295	1.11039	0	0.794312	0.648738	0.527313	0.402683		0.921723	0.943669		?
GB13520	GB44185	FBgn0000250	cactus	Toll_pathway_Toll signaling pathway ; GO:0008063 and children	Toll_pathwa		81.6092	3.9498	5.30495	5.93906	5.15636	10.8557	18.1795	16.7404	14.9272	52.0233	13.6341	7.3262	16.3744	10.1997	15.6444		18.5243	20.9297		?
GB13742	GB40654	FBgn0260632	dorsal	Toll_pathway_Toll signaling pathway ; GO:0008063 and children	Toll_pathwa		4.4577	10.4043	11.636	11.9406	11.2715	4.03544	17.8771	20.5254	7.72783	7.74574	2.44479	15.661	7.40521	18.8935	11.8197		10.9231	5.49727
GB13922	GB41067	FBgn0010269	Downstream of raf1	Toll_pathway_Toll signaling pathway ; GO:0008063 and children	Toll_pathwa		0	0.876878	0.421107	0.448992	0.341755	0	0	0.418154	0.598549	0.416839	1.26633	1.30117	0	0.890788	1.81401		0.586304	0.547459																?
GB13935	GB49466	FBgn0261988	G protein-coupled receptor kinase 2	Toll_pathway_Toll signaling pathway ; GO:0008063 and children	Toll_pathwa		30.0345	1.98957	1.45668	1.04211	1.49999	1.01779	6.01175	3.11691	7.54726	10.6051	16.9567	2.06899	18.4248	1.7892	4.04837		7.17398	8.47978		?
GB14810	GB53713	FBgn0022787	Helicase 89B	Toll_pathway_Toll signaling pathway ; GO:0008063 and children	Toll_pathwa		18.9659	1.16576	1.13134	1.13413	1.13586	2.56833	5.59562	2.4877	2.93427	4.36403	5.47141	1.59468	7.77039	2.31915	4.89859		4.23581	4.54951		?
GB15273	GB48707	FBgn0024222	immune response deficient 5	Toll_pathway_Toll signaling pathway ; GO:0008063 and children	Toll_pathwa		8.41556	1.22029	1.30227	1.18718	0.819082	0.235057	1.33883	3.4333	2.63769	1.83693	0.88113	2.60294	2.03346	2.57111	1.57776		2.13951	1.93055		?
GB15684	GB51427	FBgn0003882	tube	Toll_pathway_Toll signaling pathway ; GO:0008063 and children	Toll_pathwa		10.3567	5.35351	5.92233	4.64043	4.62006	3.97755	10.6983	11.7069	10.9628	11.452	0.828342	6.11749	131.425	11.0063	142.688		24.7837	45.7561														?		?
GB15688	GB52631	FBgn0003495	spatzle	Toll_pathway_Toll signaling pathway ; GO:0008063 and children	Toll_pathwa		4.5069	5.46509	4.99668	5.52129	5.20204	6.46809	5.53474	3.75882	6.99453	5.54556	4.09794	3.07028	10.508	3.09618	3.26125		5.20182	1.88872														?
GB15714	GB43157	FBgn0036448	myopic	Toll_pathway_Toll signaling pathway ; GO:0008063 and children	Toll_pathwa		3.87546	1.74721	1.41051	1.27717	1.33844	1.27949	2.97456	1.78417	2.2516	2.19098	1.43562	1.60083	2.25894	0.907865	2.10325		1.89574	0.760142		?
GB16281	GB45171	FBgn0010602	lesswright	Toll_pathway_Toll signaling pathway ; GO:0008063 and children	Toll_pathwa		5.1341	10.1653	14.1331	11.7931	11.0266	4.55974	21.9935	65.3293	6.69612	5.67704	15.3987	22.9027	12.0826	18.3904	11.691		15.7982	14.8285									?
GB16397	GB49344	FBgn0010441	pelle	Toll_pathway_Toll signaling pathway ; GO:0008063 and children	Toll_pathwa		3.12859	1.51613	0.7489	0.638794	1.11426	0.976261	0.285156	2.3301	1.77411	2.96524	0.375343	0.482085	0.433106	0.792093	1.20977		1.25133	0.920619		?
GB16970	GB44935	FBgn0025574	Pellino	Toll_pathway_Toll signaling pathway ; GO:0008063 and children	Toll_pathwa		4.1104	13.391	12.4158	13.4062	11.0922	16.56	8.46251	17.0321	11.6268	6.92583	3.71299	7.98793	3.83811	11.3785	14.6267		10.4378	4.42185
GB17879	GB51741	FBgn0030310	Peptidoglycan recognition protein SA	Toll_pathway_Toll signaling pathway ; GO:0008063 and children	Toll_pathwa		1.74742	7.87129	10.6585	8.40433	12.3716	2.68443	3.39774	9.08238	4.75631	11.0412	2.23617	6.46225	0.645078	2.27213	4.40453		5.86903	3.80914
GB18520	GB50418	FBgn0262473	Toll	Toll_pathway_Toll signaling pathway ; GO:0008063 and children	Toll_pathwa		10.7451	0.582618	0.631532	0.43981	0.45414	0.98118	46.4617	1.83845	58.5285	6.17219	156.352	4.3535	58.4183	0.83424	2.01452		23.2539	42.6904												?
GB19537	GB44031	FBgn0260632	dorsal	Toll_pathway_Toll signaling pathway ; GO:0008063 and children	Toll_pathwa		21.7431	1.25238	0.817332	0.513008	0.650803	1.44743	5.70752	1.56195	2.3673	5.03747	6.67791	0.696882	9.95308	0.630684	2.69045		4.11649	5.61487		?
GB10640	GB48399	FBgn0029114	Toll / Tollo	Toll_pathway_Toll signaling pathway ;	Toll_pathwa		0.881953	0.415187	0.152472	0.225096	0.13326	0.973816	0.643084	0.0698784	0.600146	0.835903	1.90457	0.10872	1.58721	0.363882	0.151571		0.603116	0.555822												?
GB13677	GB46708	FBgn0031114	cactin	Toll_pathway_Toll signaling pathway ;	Toll_pathwa		4.98131	4.04627	2.14504	2.38933	1.59748	3.4618	0.345921	5.98405	6.13366	5.84532	0.455326	2.86559	15.4993	2.84706	9.29456		4.52613	3.86932														?
GB14044	GB55007	FBgn0030051	persephone-PSH Serine Protease Immune Response Integrator	Toll_pathway_Toll signaling pathway ;	Toll_pathwa		3.26032	1.76133	0.912787	0.513866	0.958082	1.49379	1.41804	1.77652	2.0499	2.89131	3.07427	0.895476	3.54739	0.695111	1.76941		1.80117	0.981791
GB14609	GB48662	FBgn0004364	Toll	Toll_pathway_Toll signaling pathway ;	Toll_pathwa		0.817771	4.95181	0.92801	0.519468	0.658997	0.418759	1.19257	1.3477	1.73125	1.89462	0.52325	0.772863	2.11321	1.10422	0.562162		1.30244	1.13961			?
GB14720	GB42451	FBgn0086657	Mik2	Toll_pathway_Toll signaling pathway ;	Toll_pathwa		11.1739	1.25465	1.49817	1.62516	1.18943	1.76358	3.34831	3.22112	3.61081	5.8997	4.40728	1.05666	6.95025	1.46975	3.47236		3.46274	2.78359		?
GB15177	GB43456	FBgn0034476	Toll	Toll_pathway_Toll signaling pathway ;	Toll_pathwa		8.65565	2.93773	2.50284	1.67667	2.88394	3.2177	6.63501	3.65057	6.64507	6.24043	6.07084	1.76465	11.3679	1.16543	4.08121		4.63305	2.89067														?
GB15606	GB43914	FBgn0024846	0	Toll_pathway_Toll signaling pathway ;	Toll_pathwa		18.6082	3.79442	3.26198	3.25252	2.88465	2.67996	101.762	5.0396	54.7744	12.4258	43.0254	5.50006	22.2474	6.12296	6.68665		19.4711	27.6518								?
GB16299	GB48426	FBgn0029114	Toll	Toll_pathway_Toll signaling pathway ;	Toll_pathwa		4.3978	0.62631	0.245076	0.441843	0.433953	3.6595	1.0689	0.398222	0.807525	1.52171	1.40696	0.451771	2.43523	0.361324	1.36763		1.30825	1.2615		?
GB16472	GB48820	FBgn0028985	NEC LIKE	Toll_pathway_Toll signaling pathway ;	Toll_pathwa		38.1428	5.78151	9.27526	11.2818	7.18082	7.37954	30.5307	10.7978	20.6861	16.1276	19.2676	11.9139	26.9969	7.18555	6.90015		15.2965	9.9134		?
GB17012	GB46970	not found	NEC LIKE	Toll_pathway_Toll signaling pathway ;	Toll_pathwa		2.10343	1.00963	0.67134	0.572637	0.484298	0.134639	2.55623	2.35544	1.11326	1.55058	0	4.06228	0.776503	0.683761	0.240995		1.221	1.11705													?
GB17781	GB48396	FBgn0036494	Toll	Toll_pathway_Toll signaling pathway ;	Toll_pathwa		14.7975	0.800767	0.204295	0.338267	0.292586	1.04117	0.823644	0.186156	2.30595	3.56867	5.4207	0.264566	33.2762	0.101684	2.95074		4.42486	8.82968														?
GB17927	GB49441	FBgn0003450	Toll-Pathway_persephone-Serine protease--Extracellular-cSP10	Toll_pathway_Toll signaling pathway ;	Toll_pathwa		5.26753	3.73419	5.56665	4.15868	4.72994	16.7236	11.2666	5.65376	12.1074	12.4258	6.74085	6.32023	3.5002	3.05581	4.10388		7.02367	4.10358							?
GB17936	GB55933	FBgn0039532		Toll_pathway_Toll signaling pathway ;	Toll_pathwa		3.45746	1.19147	0.776534	0.52292	0.464363	1.62293	0	0.584405	2.0913	2.18462	0	2.84138	1.7018	0.979821	0.528171		1.26315	1.03035		?
GB17961	GB41158	not found	Tollip	Toll_pathway_Toll signaling pathway ;	Toll_pathwa		1.24841	2.82096	2.81569	3.09278	2.06954	4.31513	7.64644	8.45117	4.75727	2.36645	0.958553	3.97047	0	4.64507	3.08951		3.48316	2.2968									?
GB17975	GB40699	FBgn0029114	Tollo	Toll_pathway_Toll signaling pathway ;	Toll_pathwa		0.404084	1.25326	0.773814	0.330023	0.837334	4.03496	0	0.25613	0.183313	1.0213	0	0.249061	0	0.66688	0		0.667343	1.01392							?
GB18032	GB42472	not found	dorsal	Toll_pathway_Toll signaling pathway ;	Toll_pathwa		28.8638	1.19454	1.92344	1.64065	1.20498	0.121816	0.462556	0.924821	1.29502	3.20665	3.6531	2.4242	8.07933	0.808992	2.39847		3.88016	7.17388		?
GB19066	GB44032	not found	dorsal	Toll_pathway_Toll signaling pathway ;	Toll_pathwa		8.30246	37.8674	35.2481	31.5505	29.4495	92.8822	44.2997	44.4529	53.8375	34.6234	5.81231	16.7727	8.65393	19.7836	23.7696		32.4871	22.0165							?
GB19582	GB54611	FBgn0028984	NEC-like	Toll_pathway_Toll signaling pathway ;	Toll_pathwa		5.22069	12.1638	15.2836	8.18458	17.5951	17.6996	20.215	39.0935	11.9235	10.4649	11.4036	9.32059	8.77238	5.18578	6.68272		13.2806	8.48142									?
GB11563	GB45417	FBgn0041182	TEPB	TEP - Thioester-containing protein	TEP - Thioe		6.52452	1.34361	1.74999	1.41348	1.87248	1.34112	3.75233	2.80753	2.20946	2.26451	1.41117	1.44999	2.44251	1.46143	1.95831		2.26683	1.35395		?
GB12605	GB42455	FBgn0041182	TEP7	TEP - Thioester-containing protein	TEP - Thioe		38.904	4.00779	5.99972	5.33372	4.29205	7.30155	4.6695	8.89969	7.78943	15.2498	6.91463	4.58854	13.2536	2.2999	6.9611		9.09766	8.93132		?
GB18789	GB48204	FBgn0020240	TEPA	TEP - Thioester-containing protein	TEP - Thioe		7.81837	0.76574	0.525334	0.425693	0.312651	0.347679	0.360053	0.845075	1.12004	2.44405	2.36964	0.537691	3.64576	0.814928	2.31956		1.64348	1.9854		?
GB10222	GB41097	not found	SP18	serine proteases	serine prot		3.84878	1.96106	0.573249	0.314337	1.26276	0.443443	1.12255	0.780659	1.5714	4.1342	1.47758	0.80656	5.96742	0.461951	1.85204		1.77187	1.63232														?
GB10646	GB41409	FBgn0036436	SP4	serine proteases	serine prot		4.76412	0.555481	0.640225	0.443704	0.432987	0.577796	0.365664	3.81442	2.27499	3.01025	2.88788	1.73094	3.61001	1.09096	2.41317		1.90751	1.46036
GB10758	GB44146	FBgn0034709	0	serine proteases	serine prot		8.17771	25.1539	66.9238	33.3516	98.3608	247.511	48.6202	32.7355	18.4064	40.9397	19.9237	9.80941	9.7533	23.972	31.5676		47.6804	60.1994							?
GB10943	GB49946	FBgn0011653	cSPH41	serine proteases	serine prot		8.86033	0.828081	1.10465	0.546497	0.525942	0.850714	8.68142	2.10605	5.02436	4.54875	5.58069	1.55301	11.1925	1.26702	2.28408		3.66361	3.50274														?
GB11297	GB47402	not found	SP31	serine proteases	serine prot		0	0.993449	0.130115	0.166477	0.140796	0.15657	1.18904	0.155043	1.10965	3.09111	1.5651	0.0502548	7.22385	0.305821	2.52224		1.2533	1.90544														?
GB11298	GB52598	FBgn0032213	cSPH42	serine proteases	serine prot		146.568	149.716	141.12	80.3488	158.973	731.687	287.481	96.9969	300.824	396.056	85.5149	88.2518	230.407	13.3677	136.28		202.906	177.219							?
GB11511	GB40138	not found	SP32	serine proteases	serine prot		0.529454	0.117292	0.0563275	0.576552	0.365707	0.20334	0.772114	0.939668	0.960747	1.00362	0	0.195801	0.586359	0.873784	0		0.478718	0.370547
GB11552	GB48510	not found	SP34	serine proteases	serine prot		46.0498	1.22419	1.45014	1.00292	2.481	0.141485	10.7448	1.77468	11.1973	22.812	15.5575	2.86103	24.8876	0.829071	6.33122		9.95631	12.8708		?
GB11588	GB50026	not found	SP27	serine proteases	serine prot		7.69517	14.9368	4.17133	14.6146	4.93559	47.1452	2.67191	8.68677	6.81559	20.3752	4.92375	3.162	6.08731	0.714703	6.04561		10.1988	11.5036							?
GB11698	GB49552	not found	cSP3	serine proteases	serine prot		9.57785	8.54966	8.06183	8.35922	7.73449	11.0353	6.57297	5.321	6.77307	5.51785	1.62222	4.0282	5.92759	1.77509	7.93968		6.5864	2.65401
GB12253	GB50586	FBgn0003319	SP16	serine proteases	serine prot		13.8196	3.31662	3.1855	0.752444	6.84095	3.75946	4.87039	2.87605	4.44071	6.84006	10.3898	3.36454	9.69307	7.03218	10.2125		6.09293	3.60793		?
GB12300	GB41399	FBgn0042098	SP5	serine proteases	serine prot		6.30174	1.48912	1.56433	2.63056	1.16074	1.45213	5.51397	3.72808	6.86108	5.30907	1.61287	3.1591	3.25689	5.10549	7.22004		3.75768	2.13636
GB12379	GB54517	not found	SP48	serine proteases	serine prot		2.68514	0.237939	0.399933	0.4386	0.278204	0.824993	0	0.476554	0.730867	1.01798	0	0.397203	1.18949	0.563998	0		0.61606	0.674657		?
GB13019	GB54775	FBgn0030027	SPH56	serine proteases	serine prot		18.3188	4.84624	3.2734	3.6556	2.76407	3.55188	5.18733	3.26924	6.77736	9.77686	13.9973	1.66624	25.9998	4.48284	8.80285		7.75799	6.82431														?
GB13263	GB52185	not found	SP40	serine proteases	serine prot		13.3533	6.205	2.32151	1.86197	1.85594	5.00331	10.9241	8.58786	12.4109	15.0226	6.25176	1.36504	15.1492	0.732956	3.13445		6.94532	5.2385
GB13397	GB41410	not found	SPH51	serine proteases	serine prot		34.4145	0.779724	1.41459	0.958191	1.28309	1.65213	5.1328	3.32163	5.32232	13.0965	17.2658	1.92834	27.2857	1.76021	15.5925		8.7472	10.6044		?
GB13489	GB44120	FBgn0050375	SP28	serine proteases	serine prot		9.25145	0.910891	2.0505	0.909496	0.976282	2.96089	0.749531	2.47593	1.98188	6.00798	1.47988	6.08237	3.69986	4.31825	2.47323		3.08856	2.42659		?
GB13791	GB48079	FBgn0015316	SP22	serine proteases	serine prot		41.1491	15.3574	0.946545	1.5643	0.384091	0.569497	0	1.50385	4.03617	6.55866	17.79	1.18816	29.9706	0.611806	10.9581		8.83923	12.4186		?
GB14001	GB53354	FBgn0032402	cSPH50	serine proteases	serine prot		1.91413	0.954101	0.738197	0.130275	0.991605	1.65405	0.697855	1.00095	1.19398	1.81419	0	0.766867	1.32491	0.574361	1.31584		1.00475	0.555678
GB14077	GB54762	FBgn0033362	cSP6	serine proteases	serine prot		7.40549	0.663207	0.70404	0.364607	0.843457	1.81539	4.36579	2.17721	4.64612	3.18585	7.25882	1.55385	7.15443	1.20562	1.40809		2.98346	2.5588
GB14233	GB51631	not found	SP24	serine proteases	serine prot		1187.85	14.1223	80.8783	76.8023	101.329	202.096	484.455	12.1973	506.175	1280.19	2204.12	52.5189	2395.99	32.7915	869.912		633.428	799.361														?
GB14247	GB45700	FBgn0000533	cSP2	serine proteases	serine prot		3.1686	6.16157	7.0042	3.97762	8.99771	13.9269	1.54028	3.79369	9.10376	22.6905	2.02743	4.557	5.06878	0.475391	10.4069		6.86003	5.70405											?
GB14309	GB50650	not found	cSP33	serine proteases	serine prot		9.34695	0.333978	0.224542	0.20521	0.468593	0.926386	0.293136	0.802685	0.91188	4.19131	0.578771	0.545135	4.11836	0.55792	1.38181		1.65911	2.4828		?
GB14366	GB52597	not found	cSPH39	serine proteases	serine prot		4.67739	1.33842	1.67946	1.53865	1.48078	3.59275	1.98949	1.48239	3.35967	2.58601	2.99282	1.03306	2.80589	2.01755	1.20577		2.25201	1.05006		?
GB14603	GB40137	FBgn0026250	SP17	serine proteases	serine prot		21.7571	49.9272	42.8436	16.8753	57.9152	64.7978	46.0966	61.9284	16.2019	33.4606	0.787995	1.97358	49.5549	0.554307	2.53979		31.1476	23.7485
GB14644	GB41407	not found	SP29	serine proteases	serine prot		38.0756	2.79005	27.8881	15.2694	20.5847	29.0213	21.3563	34.6792	7.17494	19.8019	4.49772	5.95734	2.91932	9.18403	13.8926		16.8728	11.674
GB14654	GB41408	FBgn0039272	SP11	serine proteases	serine prot		8.33955	1.47799	1.13565	0.317849	0.576033	0.768683	4.37822	1.48009	4.69121	7.37717	8.32424	1.48037	5.91095	1.40134	1.14657		3.25373	2.96089
GB14774	GB48081	not found	SP47	serine proteases	serine prot		3.87193	0.41842	0.502349	0.24424	0.554457	0.253884	5.09563	0.718311	1.84218	1.96914	6.70724	0.942959	5.12478	0.609249	0.649192		1.96693	2.14648												?
GB15254	GB50290	not found	cSPH55	serine proteases	serine prot		44.7495	1.57807	1.45739	0.546973	1.3247	5.33126	16.2482	3.12589	7.37451	7.73244	12.9725	2.20655	24.2739	2.08266	9.66814		9.37818	11.8517		?
GB15317	GB52191	FBgn0051217	SP49	serine proteases	serine prot		14.2616	1.83451	2.23511	1.46118	1.72126	0.883429	8.27449	4.0436	3.89579	6.49203	3.82674	2.24956	8.49165	3.40511	3.90048		4.46511	3.5791		?
GB15453	GB47933	not found	SP44	serine proteases	serine prot		54.8417	1.04312	0.972415	0.904851	0.669605	3.61675	5.65492	0.948041	5.52865	12.9508	10.1018	1.02431	23.9263	0.249333	3.80807		8.41604	14.3498		?
GB15640	GB50164	not found	SP13	serine proteases	serine prot		6.46234	1.36345	1.80063	1.46608	2.28499	2.24552	1.34631	0.936267	2.51283	3.6944	1.77211	1.47945	3.74885	1.38508	3.80779		2.42041	1.46027		?
GB15702	GB48471	not found	SPH53	serine proteases	serine prot		1.61697	1.07464	1.10097	1.05649	0.837662	0.869408	1.88645	10.4952	3.8144	1.83905	0.62077	3.30883	1.43261	2.03781	1.55618		2.23649	2.45133									?
GB15980	GB42804	not found	SPH54	serine proteases	serine prot		14.569	3.36155	1.15309	1.06362	1.27096	3.34945	2.79363	1.8661	3.86492	5.47874	3.29011	0.969442	4.68973	1.06644	1.73274		3.36797	3.41051		?
GB16021	GB45565	FBgn0038481	SP35	serine proteases	serine prot		228.44	50.7533	98.9689	49.9229	96.8511	23.7083	233.486	105.919	124.598	166.034	105.19	150.527	204.368	150.02	84.6456		124.895	63.8042
GB16038	GB48080	not found	SPH57	serine proteases	serine prot		7.44098	1.23632	1.42493	1.11415	2.12011	1.00021	4.34053	3.3487	5.23218	4.46656	4.28499	3.25629	3.70833	2.17695	2.81334		3.19764	1.79365		?
GB16147	GB45701	FBgn0027930	cSP1	serine proteases	serine prot		0.611814	1.17466	0.737682	0.416399	0.950839	1.40982	1.48703	0.775599	2.77549	3.22149	0.782937	0.854754	0.677571	0.85672	0.560774		1.15291	0.809358										?	?
GB16214	GB56027	FBgn0036287	SP38	serine proteases	serine prot		1.95794	14.1469	13.0909	10.312	14.2782	24.641	15.5943	11.4367	7.65234	5.99536	5.49298	2.91487	3.66956	5.42313	10.457		9.80421	6.03716							?
GB16220	GB44149	FBgn0038727	cSP21	serine proteases	serine prot		48.5149	1.58833	2.33916	1.5615	1.44442	1.19321	8.01604	2.75701	6.07139	16.3088	41.7464	4.68426	57.6994	2.6892	14.1289		14.0495	19.0531														?
GB16367	GB40831	FBgn0038211	SP46	serine proteases	serine prot		5.25645	6.37933	5.05732	4.38636	4.89364	6.23185	7.66559	2.86826	3.93975	4.04336	1.75478	2.33834	4.04967	3.73744	4.24188		4.45627	1.55423								?
GB17145	GB46726	FBgn0051728	cSP7	serine proteases	serine prot		3.54484	0.932546	0.518552	0.392049	0.879934	0.765796	0.323095	1.4324	2.01015	1.53989	0.425281	1.09245	2.20828	0.465359	1.97993		1.23404	0.899675		?
GB17345	GB41710	FBgn0036612	SPH19	serine proteases	serine prot		11.5485	0.921017	0.823176	0.330115	1.17658	2.97162	9.43119	1.87393	2.72427	2.69989	7.3154	0.711803	6.52275	0.415834	3.09614		3.50415	3.53077		?
GB17654	GB43369	not found	SP45	serine proteases	serine prot		39.1659	11.7968	6.93929	12.1388	6.34702	12.2938	18.3432	15.2867	22.0387	32.5046	18.2169	10.4453	21.5209	9.52611	11.8051		16.5579	9.23581		?
GB18178	GB41178	FBgn0038447	SP15	serine proteases	serine prot		1.6338	0.528991	0.869082	0.273713	1.1068	1.44801	0.366554	0.477963	0.51312	1.03233	0.241243	0.63519	0.417553	0.471388	1.03673		0.736831	0.429462		?
GB18450	GB52706	FBgn0033365	cSP26	serine proteases	serine prot		14.3248	4.41184	1.52399	1.28407	2.2323	3.75714	3.0571	2.12601	4.27947	7.94744	2.01199	1.76585	3.0955	2.93546	3.12233		3.85835	3.32617		?
GB18530	GB50314	not found	SP43	serine proteases	serine prot		15.6897	0.124135	0.178842	0.0762739	0.193522	3.01285	0.817162	0	5.08401	4.60276	18.2853	0.690748	21.72	0.168139	7.70399		5.22316	7.36682														?
GB18944	GB46203	FBgn0037627	SPH37	serine proteases	serine prot		3.19036	2.12031	4.22384	3.3294	3.06064	8.8492	2.58476	1.79752	3.05542	6.04756	0.680449	3.01516	1.17775	2.18054	3.41158		3.2483	2.00285							?
GB19292	GB45336	not found	SPH52	serine proteases	serine prot		22.9654	22.6711	33.7767	24.405	24.5595	27.5431	14.689	31.4117	44.7802	25.2031	15.4678	16.5886	21.4178	6.2866	26.8659		23.9088	9.03403										?
GB19590	GB40567	FBgn0002926	SP20	serine proteases	serine prot		6.92412	1.59653	1.71382	3.45266	3.03797	3.09341	0.927329	1.05691	2.7565	4.06255	1.62749	1.35871	3.28642	2.95751	4.80843		2.84402	1.60501		?
GB19719	GB50648	FBgn0085379	cSP25	serine proteases	serine prot		19.2969	0.914419	0.724573	0.941112	0.890966	2.0212	4.81558	1.43899	3.97911	4.10777	10.1022	1.03037	11.9997	1.22308	5.81687		4.62019	5.3433		?
GB19846	GB50761	FBgn0038485	SP36	serine proteases	serine prot		16.2269	46.4628	4.35902	4.03105	2.52187	1.71381	0	1.59424	7.36132	3.33225	2.33612	0.550088	17.0724	1.27814	3.06759		7.4605	11.9758			?
GB19856	GB40926	FBgn0051265	SP12	serine proteases	serine prot		5.3287	4.80626	7.57229	7.14978	9.2674	24.8505	9.43615	7.33423	8.2881	7.21496	0.730621	3.23748	2.95071	6.11027	9.1578		7.56235	5.41198							?
GB10506	GB52097	FBgn0058006	AmSCR-B1	Scav. Receptor A	Scav. Recep		19.0362	9.72428	7.33846	6.4018	7.30919	5.93478	9.79797	7.80751	25.0946	11.7452	11.6071	8.08898	13.3934	5.98088	10.4689		10.6486	5.27175										?
GB11743	GB45986	FBgn0035290	AmSCR-B2	Scav. Receptor A	Scav. Recep		30.6151	8.82424	12.5205	9.6117	7.9584	24.1479	12.7219	17.1728	16.1286	23.5044	21.1688	6.26968	22.4214	4.49445	15.162		15.5148	7.60497
GB12378	GB50865	not found	AmSCR-B3	Scav. Receptor A	Scav. Recep		7.82478	3.85211	12.9494	8.87587	17.2652	26.0446	3.80368	11.0217	4.33853	9.33894	5.00667	16.0763	1.92573	21.914	23.309		11.5698	7.76342
GB12538	GB50482	FBgn0023479	GRAAL/Tequila-like	Scav. Receptor A	Scav. Recep		15.8806	5.42101	3.84439	4.39549	3.32369	3.19715	31.5487	5.01784	18.9667	16.0984	41.5776	1.96416	24.1056	1.35239	4.37402		12.0712	12.3208												?
GB12830	GB50454	not found	AmSCR-B4	Scav. Receptor A	Scav. Recep		24.161	7.53311	11.2814	46.8956	8.11252	32.563	16.3123	13.8681	28.0105	36.4695	11.1651	39.2704	17.0953	24.2332	70.5885		25.8373	17.2828																?
GB13360	GB49476	FBgn0034660	lox2-like	Scav. Receptor A	Scav. Recep		99.8769	3.82234	2.98475	3.03601	3.65769	2.58595	13.7061	5.92171	18.7728	54.6877	42.275	3.95991	128.477	2.6097	8.38947		26.3175	39.2715														?
GB13813	GB49363	FBgn0027562	AmSCR-B5	Scav. Receptor A	Scav. Recep		20.4739	1.54876	3.21414	1.22352	2.32823	2.10962	7.64644	6.42542	6.56956	10.5702	6.2306	2.83165	14.1024	2.7346	5.49247		6.23343	5.33484		?
GB14314	GB53014	not found	AmSCR-B6	Scav. Receptor A	Scav. Recep		19.8034	3.90561	0.976344	2.10391	2.29369	7.42011	3.87411	1.04094	5.14927	8.08764	11.1259	1.13129	10.431	1.41311	2.6563		5.42752	5.22496		?
GB15549	GB48343	not found	AmSCR-B7	Scav. Receptor A	Scav. Recep		14.7223	1.49255	0.796413	0.271729	1.12032	0.670837	2.18338	3.32148	5.99959	17.1858	3.35291	0.799765	4.69796	0.898503	3.08765		4.04008	5.12693		?									?
GB16388	GB40306	not found	AmSCR-B8	Scav. Receptor A	Scav. Recep		259.226	59.2095	76.2689	121.675	84.742	122.902	95.1605	87.3682	165.854	189.21	101.235	54.5444	144.534	79.1254	189.876		122.062	57.662		?
GB19649	GB54246	FBgn0033192	Corin-like	Scav. Receptor A	Scav. Recep		382.215	62.8462	12.5019	4.69403	20.5619	45.408	58.8756	43.1984	126.133	383.098	62.7352	18.2481	148.373	38.4338	37.0868		96.2939	122.694		?									?
GB19683	GB50866	FBgn0010435	AmSCR-B10	Scav. Receptor A	Scav. Recep		9.25632	9.85858	7.61295	7.94748	11.0658	14.6299	18.6905	7.31136	15.5045	16.4213	21.1849	6.14409	13.7997	7.47784	13.9499		12.057	4.63097
GB19916	GB44045	FBgn0015924	AmSCR-B9	Scav. Receptor A	Scav. Recep		4.80924	0.996672	1.4029	1.22479	1.60735	1.2512	5.65598	8.16171	5.13758	5.39134	7.7426	3.05984	7.21605	2.90943	8.1051		4.31145	2.706
GB19925	GB54506	FBgn0014033	AmSCR-C	Scav. Receptor A	Scav. Recep		10.8863	6.57734	5.56526	4.59949	5.8105	2.9321	10.1028	5.21558	10.5186	13.4892	2.1711	3.1371	5.48018	2.12117	3.01289		6.10797	3.55249											?
GB18313	GB43738	FBgn0033367	PPO	PPO - melanization	PPO - melan		5.01443	3.1739	2.36253	1.75516	1.08237	1.51314	0.783498	2.11137	4.22462	3.73419	1.0313	1.78819	1.98335	2.49879	5.17062		2.5485	1.41311
GB18767	GB50013	FBgn0036891	PPOAct	PPO - melanization	PPO - melan		4.97099	11.7536	11.228	12.2187	9.82204	30.95	9.89807	10.3373	7.41577	9.36247	3.85352	4.70193	3.28198	2.78243	10.5802		9.5438	6.76772							?
GB10231	GB40163	FBgn0034539	CG11159	Lysozyme	Lysozyme		86.4365	277.364	13.0042	19.0153	23.6705	17.1012	0	1.88161	24.1609	12.6885	0	1.39917	99.5943	0.130992	4.20136		38.7099	72.7008			?
GB19988	GB47104	FBgn0025827		Lysozyme	Lysozyme		27.0507	147.818	66.4788	116.478	64.1505	42.5948	161.739	100.019	395.962	133.889	36.3476	88.5891	27.9609	112.149	124.59		109.721	90.5712										?
GB10567	GB49149	FBgn0004647	Notch	JNK cascade ; GO:0007254	JNK cascade		209.542	275.257	294.118	282.109	141.317	33.1423	73.1608	166.271	68.4625	129.32	44.4286	328.028	106.826	152.219	59.1206		157.555	98.7582
GB11373	GB45558	FBgn0010333	Rac1	JNK cascade ; GO:0007254	JNK cascade		6.91894	3.64035	5.24465	4.65015	4.85376	3.8198	2.52251	12.4441	7.25842	4.37179	1.66015	4.90424	9.09931	6.68251	7.72899		5.71998	2.73399									?
GB11819	GB47961	FBgn0024329	Mekk1	JNK cascade ; GO:0007254	JNK cascade		4.86843	0.352593	0.288852	0.293112	0.355675	0.53935	1.2288	1.99394	1.2317	2.1888	4.13345	1.13104	2.2811	0.266884	1.35156		1.50035	1.41185		?
gb12004	GB53318	FBgn0001291	Jun-related antigen	JNK cascade ; GO:0007254	JNK cascade		7.12025	8.67555	3.84165	4.22296	4.21554	8.39903	3.70843	1.54738	2.76866	14.7824	1.95252	1.44198	6.19576	2.51805	12.5863		5.59843	4.03643											?
GB12212	GB42049	FBgn0001297	kayak	JNK cascade ; GO:0007254	JNK cascade		65.1468	21.8366	21.6965	17.0415	16.9234	17.4052	7.43517	13.7166	34.4367	30.0673	27.1853	15.7822	34.5059	8.75419	22.9762		23.6606	14.1187		?
GB12587	GB49368	FBgn0014011	Rac2	JNK cascade ; GO:0007254	JNK cascade		3.72049	1.17745	1.1309	0.651126	0.642459	0.40825	2.32528	0.875917	2.65226	4.36581	3.06071	0.393113	1.76587	1.03664	0		1.61375	1.32104											?
GB12838	GB43176	FBgn0015286	Ras-related protein	JNK cascade ; GO:0007254	JNK cascade		110.447	2.27959	2.18947	1.12054	2.13228	1.05385	102.042	2.69591	38.2783	148.676	94.8108	3.04434	88.1292	2.98475	65.5498		44.3622	51.931											?
GB13135	GB47431	FBgn0014020	Rho1	JNK cascade ; GO:0007254	JNK cascade		22.008	16.9209	10.3297	12.4234	13.3013	12.4299	2.83189	10.5855	14.9759	13.0879	6.21257	6.38347	25.8072	7.28361	13.7941		12.5584	5.98679														?
GB14469	GB44237	FBgn0004636	Roughened	JNK cascade ; GO:0007254	JNK cascade		16.6962	69.706	66.117	67.2827	73.6266	47.8546	61.7729	96.54	179.351	131.545	16.6181	41.1509	20.5452	48.6458	59.088		66.436	43.4224										?
GB14925	GB50631	FBgn0010341	Cdc42	JNK cascade ; GO:0007254	JNK cascade		3.4631	9.46203	11.667	10.3314	8.87051	15.5169	22.3055	39.2921	11.39	5.10576	0	9.81876	1.27843	12.1667	10.1177		11.3857	9.5055									?
GB15424	GB53394	FBgn0003371	shaggy	JNK cascade ; GO:0007254	JNK cascade		14.6826	44.6739	35.1274	37.1795	32.4144	23.0548	49.1245	60.0876	120.404	98.5215	10.923	23.7156	12.5651	25.7017	34.3848		41.504	31.0309										?
GB16401	GB56012	FBgn0000229	basket	JNK cascade ; GO:0007254	JNK cascade		56.8639	313.2	286.753	188.234	47.992	52.0039	661.851	1519.27	207.66	180.323	33.4281	1202.87	111.388	499.62	172.485		368.929	442.721									?
GB16764	GB44888	FBgn0033483	eiger	JNK cascade ; GO:0007254	JNK cascade		3.87997	45.9587	6.56581	2.95428	10.2175	21.4205	21.9257	27.6674	72.6611	189.462	7.91327	6.66619	5.63979	19.5919	11.5857		30.274	47.8638											?
GB17167	GB51894	FBgn0010303	hemipterous	JNK cascade ; GO:0007254	JNK cascade		2.77708	1.48677	1.47724	1.41755	1.17889	2.17754	1.68744	3.56452	2.04721	2.85141	0.444227	1.14112	1.53778	1.97908	1.74996		1.83452	0.778369									?
GB17935	GB45540	FBgn0000097	anterior open	JNK cascade ; GO:0007254	JNK cascade		22.6409	3.7372	3.06993	4.35087	2.35729	3.92143	6.15035	5.99364	7.55223	8.55544	26.6301	4.65164	18.1912	4.79556	7.70575		8.6869	7.52143												?
GB20112	GB45657	FBgn0010341	Cdc42	JNK cascade ; GO:0007254	JNK cascade		7.87299	8.7603	9.44194	6.43001	8.80597	7.62788	6.00161	9.82184	18.6696	9.83616	5.49548	4.41145	5.74673	4.0805	7.2572		8.01731	3.49069										?
GB19901	GB44634	FBgn0243512		JNK cascade	JNK cascade		21.1417	53.1117	51.3321	149.782	60.072	78.6285	117.964	77.3535	149.361	138.707	20.0507	50.0944	35.0748	21.2507	38.3156		70.816	46.6092
GB11408	GB52985	FBgn0043884	multiple ankyrin repeats single KH domain	JAK-STAT cascade ; GO:0007259 and children	JAK-STAT ca		8.30979	10.8066	7.50257	10.8649	7.29108	10.0055	4.25779	3.84931	9.27151	7.97525	5.17331	4.23589	6.1187	11.598	11.2087		7.89793	2.70694
GB12007	GB40911	FBgn0003612	Suppressor of variegation 2-10	JAK-STAT cascade ; GO:0007259 and children	JAK-STAT ca		11.7066	1.23686	1.20712	0.661916	0.777507	0.622523	2.62647	2.55714	2.69621	4.55196	10.7172	1.4209	13.7627	2.10764	2.35235		3.93367	4.36747														?
GB12159	GB42244	FBgn0043903	domeless	JAK-STAT cascade ; GO:0007259 and children	JAK-STAT ca		4.88406	1.18217	1.05845	1.13265	1.07766	1.70207	2.11038	1.57082	2.09256	2.57169	2.60422	0.9254	2.70449	2.02188	2.61136		2.01666	1.0171		?
GB14092	GB42304	FBgn0001319	knot	JAK-STAT cascade ; GO:0007259 and children	JAK-STAT ca		284.222	14.4306	6.87591	4.84901	9.79839	21.9877	27.2737	11.1448	46.8076	147.995	52.5063	8.12397	98.9115	11.0137	37.7823		52.2482	75.5028		?
GB16422	GB44594	FBgn0004864	hopscotch	JAK-STAT cascade ; GO:0007259 and children	JAK-STAT ca		4.23792	1.23532	1.09156	0.819754	0.866617	1.32778	1.62638	2.05001	2.27668	2.88917	1.28446	1.97968	2.22319	1.13779	2.2233		1.81797	0.90299		?
GB18923	GB50020	FBgn0016917	Signal-transducer and activator of transcription protein at 92E	JAK-STAT cascade ; GO:0007259 and children	JAK-STAT ca		26.9622	2.18888	1.53222	1.39053	1.38809	2.44403	5.12864	3.20571	8.88866	9.10013	5.7863	0.805117	10.2007	1.5829	4.95026		5.70362	6.65238		?
GB14250	GB51500	FBgn0085402		JAK-STAT cascade	JAK-STAT ca		22.5824	4.43564	5.35941	3.34769	5.69935	7.19814	20.666	11.1266	25.632	13.8645	13.3378	3.22332	14.7829	7.10535	7.73051		11.0728	7.23063										?
GB18949	GB55283	FBgn0041184		JAK-STAT cascade	JAK-STAT ca		1.35361	1.96279	1.83283	2.34504	1.50871	1.03972	8.2549	4.63314	6.64307	1.78833	5.43285	3.00352	9.81225	2.06777	3.12992		3.6539	2.7185														?
GB10026	GB44490	FBgn0031213		immune-related	immune-rela		8.44619	8.66621	6.10083	7.35197	5.29666	10.8411	5.83449	7.77686	9.4782	16.4317	3.83989	5.34289	6.64624	6.43602	6.26457		7.65026	3.02242											?
GB11320	GB53101	FBgn0020305		immune-related	immune-rela		1.61634	4.9235	2.53639	3.52024	2.58178	2.63824	11.7857	1.74168	5.6827	5.3618	0.775659	1.34493	0.447515	2.72815	1.66668		3.29009	2.8378								?
GB11902	GB45882	FBgn0003326		immune-related	immune-rela		0.644266	1.28454	1.05555	1.89426	1.40178	2.42485	0.939545	1.79682	1.87053	0.895585	1.48404	0.857735	2.56864	1.62389	1.24009		1.46547	0.568285
GB12454	GB48687	not found		immune-related	immune-rela		18.921	327.399	297.03	336.376	447.251	350.473	159.986	108.163	213.781	563.08	9.71935	30.9347	4.82053	14.7002	59.4164		196.137	181.191											?
GB12883	GB50507	not found		immune-related	immune-rela		54.507	10.1037	6.44978	12.7191	13.8784	28.7305	9.32776	4.12477	17.6622	49.201	13.3455	5.14224	11.0875	3.922	14.338		16.9693	15.4927		?									?
GB13522	GB47208	FBgn0030018		immune-related	immune-rela		6.80829	1.05372	0.625098	0.609364	0.402625	0.501461	0.544037	0.744859	2.62318	3.65365	4.2966	0.563347	5.88743	0.909519	1.4746		2.04652	2.127		?
GB13979	GB50509	not found		immune-related	immune-rela		7.60367	5.33415	4.3986	3.60096	3.77491	10.4033	2.07911	3.01225	7.83302	6.00555	1.82445	1.93322	7.89459	1.61612	3.48467		4.71991	2.69741							?
GB14645	GB50508	FBgn0243514		immune-related	immune-rela		14.5186	229.946	212.635	224.973	287.833	248.275	134.016	94.0171	161.732	359.881	9.59939	24.3139	5.717	10.2701	49.718		137.83	117.78
GB14962	GB54664	FBgn0027594		immune-related	immune-rela		4.22592	2.7117	1.0387	1.07112	1.40915	4.19738	1.06254	2.08747	4.36303	5.06413	1.95803	0.718534	4.19596	0.612159	2.10364		2.45463	1.54891
GB15645	GB45138	FBgn0030505		immune-related	immune-rela		62.4509	11.6725	9.39367	8.62157	8.73454	16.1033	23.7794	11.0246	26.1167	34.1333	30.4484	8.65562	88.6957	6.79005	35.1529		25.4515	23.1498														?
GB17018	GB42358	FBgn0087011		immune-related	immune-rela		11.3394	1.01293	1.8874	1.26967	1.16855	1.12386	4.5342	2.13307	5.06115	10.054	7.72361	1.48801	12.3556	1.97567	6.0349		4.6108	4.01051
GB18324	GB46478	FBgn0052226		immune-related	immune-rela		12.0742	1.06591	0.676079	0.71673	0.470299	0.906513	1.45631	1.24294	2.47104	4.87579	5.40216	0.884094	8.44543	0.65378	2.18426		2.9017	3.40873		?
GB19452	GB42685	not found		immune-related	immune-rela		5.20192	21.3834	11.5911	7.39553	10.8791	4.21763	12.222	11.7602	20.8453	15.3387	3.88318	4.52438	6.40112	2.90502	7.35059		9.72661	5.89717
GB20003	GB42082	FBgn0041780		immune-related	immune-rela		2.57439	1.80599	1.55201	0.992868	1.03728	0.247177	1.87714	3.07318	3.50361	3.93106	0	1.42807	1.90072	1.38402	1.17981		1.76582	1.11179
GB10009	GB50238	FBgn0003884	alpha-Tubulin at 84B	Immune system process (GO:0002376)	Immune syst		7.01145	12.685	8.50364	17.1791	12.5514	57.087	14.9966	11.9994	7.42173	3.83954	0	7.145	2.07067	16.3401	12.6924		12.7682	13.2845							?
GB10069	GB51712	FBgn0261560	Thor	Immune system process (GO:0002376)	Immune syst		5.47823	23.432	21.8781	24.3211	14.9175	20.8776	29.4979	54.8637	22.1756	15.7097	4.85341	22.545	7.9338	40.969	21.4367		22.0593	12.9833									?
GB10124	GB46739	FBgn0013576	mustard	Immune system process (GO:0002376)	Immune syst		98.3153	100.703	126.368	92.4845	113.532	32.0482	89.5333	144.076	114.931	132.793	50.3469	244.089	88.2527	301.813	106.057		122.356	68.4207															?
GB10171	GB55582	FBgn0261617	nejire	Immune system process (GO:0002376)	Immune syst		3.07171	0.680487	0.326793	0.278746	0.235745	0.262157	2.48863	0.951871	0.928987	0.646961	0	0.126219	0.377984	0.614472	0.703864		0.779642	0.866123		?
GB10274	GB52588	FBgn0010247		Immune system process (GO:0002376)	Immune syst		1.40221	1.59603	2.01133	1.7573	1.46951	2.46979	3.31409	2.59895	2.74186	2.62744	1.39221	1.29342	1.55291	1.61772	1.99432		1.98927	0.616692								?
GB10471	GB45135	FBgn0028982	Spt6	Immune system process (GO:0002376)	Immune syst		8.33925	1.95988	1.24979	1.76686	1.22716	3.64833	5.49902	2.89573	4.27655	3.25317	6.68143	1.81464	5.46102	2.39351	3.04081		3.56714	2.10858		?
GB10524	GB55808	FBgn0020306		Immune system process (GO:0002376)	Immune syst		7.73887	3.28272	0.832678	0.879838	0.926339	1.40164	16.2874	0.880724	7.50021	14.8085	6.2459	0.628763	9.44717	1.14128	4.927		5.1286	5.18412								?
GB10574	GB43216	FBgn0261547	Ephexin	Immune system process (GO:0002376)	Immune syst		19.9354	4.09893	3.71818	3.2648	3.37792	3.23	6.63209	4.2094	7.99801	12.6357	9.0884	2.85682	14.3507	2.16843	5.69582		6.88404	5.13308		?
GB10654	GB47452	FBgn0261797	Dynein heavy chain 64C	Immune system process (GO:0002376)	Immune syst		16.7007	1.96777	0.744669	0.83577	0.501855	1.65066	5.73058	1.31803	4.19666	5.14692	8.01445	0.968814	21.1703	1.23439	18.0651		5.88311	7.00894														?
GB10667	GB50038	FBgn0001108	Glued	Immune system process (GO:0002376)	Immune syst		4.13595	3.22978	1.92506	2.09711	2.26759	2.30323	1.05552	3.13279	2.7675	4.57333	1.19087	1.87368	2.74828	3.16467	1.91915		2.55897	0.983668											?
GB10718	GB53167	FBgn0085432		Immune system process (GO:0002376)	Immune syst		64.8843	16.9957	15.3687	22.2189	18.0396	20.2174	21.4239	29.6425	64.7935	103.654	7.83324	14.4877	20.7891	9.06123	23.5641		30.1983	26.5985											?
GB10863	GB41845	FBgn0036844	Mitogen-activated protein kinase phosphatase 3	Immune system process (GO:0002376)	Immune syst		3.76531	1.42996	0.987153	1.1532	1.32362	3.61522	0.980541	1.55132	1.83014	5.2681	1.03253	0.745968	1.48929	0.68597	1.2942		1.81017	1.32704											?
GB10917	GB52158	FBgn0031975	Transglutaminase	Immune system process (GO:0002376)	Immune syst		28.0474	9.21304	7.12022	7.87257	10.3212	27.5609	12.9758	2.74638	11.0565	11.4887	5.94078	6.10421	12.8532	23.768	11.1695		12.5492	7.77211
GB10996	GB53462	FBgn0005630	longitudinals lacking	Immune system process (GO:0002376)	Immune syst		9.69803	3.40169	2.57938	3.96027	3.48889	8.69068	120.214	2.45885	34.0962	9.19166	214.082	4.18423	221.072	2.30377	40.556		45.3319	76.2829												?		?
GB11052	GB43375	FBgn0040324	Ephrin	Immune system process (GO:0002376)	Immune syst		11.9719	4.83919	3.9268	5.95182	2.96422	8.89863	7.14468	3.55837	8.67295	8.09985	8.273	3.00154	11.0964	4.89108	8.40711		6.77984	2.87586
GB11073	GB53490	FBgn0005630	longitudinals lacking	Immune system process (GO:0002376)	Immune syst		7.96369	24.6991	19.6681	27.0229	22.8869	15.2925	5.8068	28.7004	46.9655	65.415	6.55143	13.7438	7.55967	18.1781	26.5904		22.4696	16.1327											?
GB11075	GB47732	FBgn0260936	scrawny	Immune system process (GO:0002376)	Immune syst		5.77041	0.725544	0.647086	0.318432	0.350101	0.658857	1.59205	1.66074	2.05175	1.67523	1.7962	0.730555	3.10894	1.07633	1.50094		1.57754	1.38143		?
GB11202	GB49929	FBgn0002526	Laminin A	Immune system process (GO:0002376)	Immune syst		138.946	1.82504	1.17838	0.987244	1.10948	2.63408	89.271	2.34856	33.2062	52.2031	138.161	3.58111	166.408	1.18868	40.4824		44.902	59.3493														?
GB11241	GB45708	FBgn0031975	Transglutaminase	Immune system process (GO:0002376)	Immune syst		26.8823	96.321	119.786	136.769	162.405	257.509	21.0219	29.8807	86.073	123.085	48.6104	16.0409	22.868	47.6969	187.476		92.1617	72.1076							?
GB11364	GB47224	FBgn0000568	Ecdysone-induced protein 75B	Immune system process (GO:0002376)	Immune syst		22.7772	64.1353	34.4933	197.607	45.5799	57.9963	18.479	32.4127	97.2715	125.359	16.9862	57.6339	44.4197	87.7893	154.742		70.5122	53.1415					?
GB11410	GB52999	FBgn0027932	A kinase anchor protein 200	Immune system process (GO:0002376)	Immune syst		752.227	314.646	209.173	221.995	308.624	324.801	481.847	331.287	870.257	839.153	1242.23	124.094	1000.06	112.783	934.458		537.842	365.235
GB11411	GB45655	FBgn0004837	Suppressor of Hairless	Immune system process (GO:0002376)	Immune syst		0	0.902839	0.751528	0.332845	0.750663	2.19125	0	0.137771	1.47904	1.37337	0.521529	0.167461	1.80537	0.326101	0		0.715985	0.703293							?
GB11564	GB43099	FBgn0028982	Spt6	Immune system process (GO:0002376)	Immune syst		11.3603	3.69354	2.07809	3.55995	2.8226	3.2016	3.09884	2.9839	3.59638	4.64767	3.29452	1.26943	3.43948	2.34202	3.98898		3.69182	2.2709		?
GB11581	GB53848	FBgn0036752	Adenosine deaminase-related growth factor A	Immune system process (GO:0002376)	Immune syst		5.18551	1.97588	2.09637	1.89168	1.71925	4.38135	6.35219	3.78645	4.04614	3.66969	3.58338	1.58529	2.75657	0.809111	2.13881		3.06518	1.52822								?
GB11734	GB41654	FBgn0013799	Deformed epidermal autoregulatory factor-1	Immune system process (GO:0002376)	Immune syst		7.57217	1.09682	1.30133	1.82358	1.25728	0.447405	0	0.775325	3.03875	3.49639	5.03139	0.179507	2.90285	1.7041	3.20329		2.25535	2.03611		?
GB11906	GB45526	FBgn0021895		Immune system process (GO:0002376)	Immune syst		60.8101	5.84751	4.79878	4.77545	3.4041	6.54438	14.1304	7.58185	10.1555	43.279	78.8875	4.44828	89.5478	5.96533	17.4561		23.8422	29.4486														?
GB11941	GB43092	FBgn0013762	Cyclin-dependent kinase 5	Immune system process (GO:0002376)	Immune syst		3.76286	15.9947	14.0613	16.8706	13.625	21.903	10.4605	18.0522	11.2023	5.86969	1.12859	6.71141	3.77661	14.4136	11.3169		11.2766	5.98767
GB12005	GB42215	FBgn0004657	myospheroid	Immune system process (GO:0002376)	Immune syst		3.42008	1.94827	1.39044	1.1306	1.70847	3.56521	1.9594	1.08391	2.9368	4.63072	1.17232	0.331257	1.21746	0.806331	1.7633		1.93764	1.19											?
GB12053	GB50037	FBgn0003884	alpha-Tubulin at 84B	Immune system process (GO:0002376)	Immune syst		2.04316	1.86709	2.20085	0.556229	2.2933	0.49043	3.35203	1.03605	1.1586	2.58198	0	0.787077	1.97991	0.306539	1.75567		1.49393	0.958812
GB12064	GB50654	FBgn0032363	CG6509	Immune system process (GO:0002376)	Immune syst		7.86177	0.781179	0.719548	0.41704	0.668808	0.466224	3.20345	1.45832	4.14342	6.83034	5.21529	1.0404	4.54543	0.711178	2.0664		2.67525	2.48349		?
GB12094	XP_006567597	FBgn0005630	longitudinals lacking	Immune system process (GO:0002376)	Immune syst		#N/A	#N/A	#N/A	#N/A	#N/A	#N/A	#N/A	#N/A	#N/A	#N/A	#N/A	#N/A	#N/A	#N/A	#N/A		#N/A	#N/A		#N/A	#N/A	#N/A	#N/A	#N/A	#N/A	#N/A	#N/A	#N/A	#N/A	#N/A	#N/A	#N/A	#N/A	#N/A
GB12173	GB54228	FBgn0029113	Smt3 activating enzyme 2	Immune system process (GO:0002376)	Immune syst		2.93362	0.620355	0.978866	1.03461	0.552635	0.512124	2.528	3.51611	1.93576	2.19066	2.04772	0.969836	1.47678	1.46045	1.28333		1.60273	0.904388									?
GB12207	GB54477	FBgn0003731	Epidermal growth factor receptor	Immune system process (GO:0002376)	Immune syst		12.1228	15.0639	12.2097	11.9615	11.4764	8.83896	29.7041	11.3505	31.4057	32.0004	26.932	10.3849	19.2867	11.1344	10.5333		16.9604	8.54677
GB12209	GB55970	FBgn0005655	mutagen-sensitive 209	Immune system process (GO:0002376)	Immune syst		1.60651	2.20211	2.4462	1.66742	1.54312	2.50652	3.80707	5.58787	2.86963	1.52263	13.2988	3.05721	15.4566	1.6872	4.41748		4.24509	4.29526												?		?
GB12228	GB55583	FBgn0261617	nejire	Immune system process (GO:0002376)	Immune syst		10.0459	3.2844	2.16768	2.25517	2.09147	3.28255	5.78915	3.23515	5.67826	7.39695	3.81005	1.33824	6.05626	2.05417	4.00985		4.16635	2.39771		?
GB12280	GB44534	FBgn0039141	spastin	Immune system process (GO:0002376)	Immune syst		7.43068	6.90114	0.684116	0.427926	1.38184	1.26225	2.08391	1.05068	1.42616	5.95921	2.46869	0.704611	3.16512	2.20824	3.14344		2.68653	2.28492		?
GB12288	GB42607	FBgn0264294	Cytochrome b5	Immune system process (GO:0002376)	Immune syst		3.68727	12.5796	8.74786	10.7911	8.53208	33.8452	12.3676	5.32878	27.6	28.4239	2.12337	1.8636	6.12536	0.940453	0.760425		10.9144	10.6712							?
GB12298	GB48789	FBgn0032363	CG6509	Immune system process (GO:0002376)	Immune syst		7.68114	1.31237	0.432625	0.293848	0.424791	1.02189	1.09819	0.521874	1.41204	6.7884	0.578208	0.457963	2.00158	0.632698	1.06986		1.71516	2.29508		?									?
GB12312	GB47313	FBgn0003261	Rm62	Immune system process (GO:0002376)	Immune syst		3.5297	12.7955	7.23723	8.38622	5.31938	9.61242	4.21153	5.0441	11.3543	8.31281	1.84784	8.62314	4.6198	12.1319	8.82337		7.45661	3.28329
GB12357	GB42600	FBgn0036844	Mitogen-activated protein kinase phosphatase 3	Immune system process (GO:0002376)	Immune syst		17.2542	1.57881	1.83563	0.970085	1.10111	1.87272	9.29902	3.89913	12.0813	12.3242	15.1201	1.61833	10.8005	2.9826	13.9239		7.11077	5.98187
GB12373	GB46510	FBgn0010247	Poly-(ADP-ribose) polymerase	Immune system process (GO:0002376)	Immune syst		3.36461	0.69016	0.464014	0.390138	0.49493	0.717886	0.363457	1.32699	0.791442	1.25982	0.239204	0.921692	1.24208	1.10308	0.428322		0.919855	0.764807		?
GB12465	GB45757	FBgn0003896	tailup	Immune system process (GO:0002376)	Immune syst		82.859	6.14306	7.6211	3.50494	8.83574	10.5229	20.7008	19.9201	40.2846	57.5697	23.4459	14.9347	101.27	6.33955	125.947		35.3266	38.8557																?
GB12478	GB49992	FBgn0021895	yantar	Immune system process (GO:0002376)	Immune syst		2.21689	4.91115	5.28978	6.81119	5.08597	4.25703	8.77509	11.0407	7.47084	7.404	7.295	5.81696	2.80589	8.83774	3.91875		6.12913	2.41757									?
GB12556	GB55472	FBgn0003205	Ras oncogene at 85D	Immune system process (GO:0002376)	Immune syst		8.93111	12.1878	6.84116	13.7617	7.71117	25.5195	12.5034	3.57775	7.77906	4.51455	1.37149	3.83132	4.74768	9.37964	8.34976		8.73381	5.84219							?
GB12585	GB41629	FBgn0025936	Eph receptor tyrosine kinase	Immune system process (GO:0002376)	Immune syst		33.3973	7.32207	5.85643	4.82818	8.17335	14.8609	18.138	7.15363	21.3154	42.7868	15.4742	4.37248	22.7022	4.82059	14.8833		15.0723	11.3091											?
GB12639	GB55272	FBgn0011202	diaphanous	Immune system process (GO:0002376)	Immune syst		7.95836	3.00194	4.07318	2.4008	3.23137	6.98027	27.9167	3.6538	15.3682	23.9875	5.57384	2.41283	7.62267	1.6942	9.61092		8.36578	8.01154								?
GB12643	GB55408	FBgn0030964	PDGF- and VEGF-related factor 1	Immune system process (GO:0002376)	Immune syst		60.8323	13.7137	12.7385	10.1465	10.8375	18.4271	51.541	16.8355	27.5966	82.4238	106.08	7.89499	92.753	6.49158	46.6772		37.666	33.7687												?
GB12742	GB53016	FBgn0085407	PDGF- and VEGF-related factor 3	Immune system process (GO:0002376)	Immune syst		77.2133	11.4036	10.206	7.59073	12.9966	28.1565	26.7287	15.2758	27.2439	38.1925	30.6909	8.02801	51.3936	12.6376	30.2925		25.87	18.993		?
GB12839	GB46452	FBgn0000996	double parked	Immune system process (GO:0002376)	Immune syst		3.11786	1.00467	0.889565	0.713766	0.464978	0.489857	1.86007	1.6888	3.086	2.05959	1.3602	1.38015	2.19734	2.14752	1.16908		1.5753	0.841047
GB13057	GB40690	FBgn0264707	RhoGEF3	Immune system process (GO:0002376)	Immune syst		51.7323	8.57084	8.72006	8.53891	6.50902	6.7925	32.7239	16.7947	37.434	46.1326	22.2794	9.85868	28.279	6.60058	15.3876		20.4236	15.3212		?
GB13109	GB44213	FBgn0014141	cheerio	Immune system process (GO:0002376)	Immune syst		12.3978	4.86152	4.87388	2.88785	6.46842	18.3329	9.18504	6.10182	9.32367	13.5728	16.6715	3.04027	11.6745	3.55104	7.24656		8.6793	4.91907
GB13113	GB50397	FBgn0021873	Gef26	Immune system process (GO:0002376)	Immune syst		9.95272	11.2307	15.9593	12.631	10.0267	11.9063	10.1909	10.5876	13.7181	14.4239	3.41446	4.82403	13.9305	4.81644	8.4431		10.4037	3.7208
GB13159	GB53150	FBgn0263289	scribbled	Immune system process (GO:0002376)	Immune syst		16.2049	3.85751	2.85907	1.52077	3.16328	3.71096	6.89878	3.50891	6.16419	6.55055	12.9448	2.55595	113.03	3.30711	70.3675		17.1096	31.5933														?
GB13170	GB46539	FBgn0040068	vav	Immune system process (GO:0002376)	Immune syst		6.01753	3.96116	2.62479	2.08286	2.15245	7.16429	4.13701	5.60146	4.40676	4.88857	3.96032	2.82941	3.23694	3.39202	3.72298		4.0119	1.43928							?
GB13192	GB49985	FBgn0259984		Immune system process (GO:0002376)	Immune syst		157.544	23.2881	23.0289	12.92	26.4359	21.9146	55.6109	61.5861	54.9284	99.2526	42.2097	75.2928	76.1411	42.958	43.499		54.4407	37.3415		?
GB13202	GB40333	FBgn0040324	Ephrin	Immune system process (GO:0002376)	Immune syst		350.678	36.1299	32.9888	26.4872	37.2278	56.4526	101.055	50.667	102.246	144.181	131.673	32.1843	175.967	39.1708	87.0922		93.6134	85.2183		?
GB13381	GB52563	FBgn0000212	brahma	Immune system process (GO:0002376)	Immune syst		25.7894	8.44893	6.51394	8.78781	5.01869	5.60301	15.3284	9.40751	31.0071	56.8336	23.043	4.14912	21.5004	6.70435	11.1346		15.9513	14.1179											?
GB13405	GB54530	FBgn0031216	CG11376	Immune system process (GO:0002376)	Immune syst		31.142	0.380459	0.316696	0.264939	0.296561	0.505671	3.5063	0.47897	2.18146	5.85978	4.94491	0.564548	6.2765	0.455204	1.29865		3.89817	7.83865		?
GB13459	GB51481	FBgn0031464	Dual oxidase	Immune system process (GO:0002376)	Immune syst		75.498	4.48239	5.51	4.70675	5.51469	8.43767	7.04642	6.50822	6.74719	6.77397	23.4774	4.02053	23.9132	3.79458	12.8711		13.2868	18.3785		?
GB13523	GB53472	FBgn0005630	longitudinals lacking	Immune system process (GO:0002376)	Immune syst		35.2405	3.65951	3.28051	3.44778	2.56727	5.70978	9.63598	2.16392	10.4914	14.9606	26.4241	0.746653	22.5631	2.23053	9.08454		10.1471	10.3492		?
GB13567	GB41547	FBgn0259099	Doublecortin-domain-containing echinoderm-microtubule-associated protein ortholog	Immune system process (GO:0002376)	Immune syst		16.3238	5.28683	6.9183	5.30137	7.20023	5.96259	17.9834	22.7069	13.8044	14.014	7.49298	8.59588	8.94087	4.51218	8.29416		10.2225	5.44692									?
GB13582	GB54852	FBgn0032006	PDGF- and VEGF-receptor related	Immune system process (GO:0002376)	Immune syst		6.65194	1.71923	1.23845	1.0375	1.38797	1.3838	2.42516	1.96763	2.95478	4.29064	2.66015	2.25499	6.29254	1.33067	2.38164		2.66514	1.75671		?												?
GB13642	GB41009	FBgn0031975	Transglutaminase	Immune system process (GO:0002376)	Immune syst		1.66522	2.95121	2.48023	1.81335	4.31328	6.39536	0	0	0.755426	1.05218	0	1.02637	0	3.99737	1.14473		1.83965	1.88383							?
GB13665	GB49498	FBgn0038046	CG5641	Immune system process (GO:0002376)	Immune syst		8.89019	1.74651	1.90946	1.68961	1.76689	2.70569	2.93541	3.01954	2.20675	2.75567	3.54182	1.40607	4.45842	1.13248	2.65212		2.85444	1.88461		?
GB13670	GB46338	FBgn0043550	Tetraspanin 68C	Immune system process (GO:0002376)	Immune syst		5.83103	0.607891	0.766316	0.490237	0.503455	1.84424	1.75072	1.02184	2.87865	14.6292	7.24249	1.05706	7.97721	0.87484	3.77265		3.41652	3.98548											?
GB13747	GB47828	FBgn0011764		Immune system process (GO:0002376)	Immune syst		7.15049	2.48072	1.92334	2.13029	2.09675	4.30062	5.31222	4.01925	5.75318	6.30828	4.92053	3.35951	11.0567	3.05647	8.0688		4.79581	2.57571														?
GB13819	GB51694	FBgn0003447	singed	Immune system process (GO:0002376)	Immune syst		0.823127	1.5109	1.71388	1.07242	1.25894	0.858056	7.54526	8.2435	1.9204	1.7832	0.902874	2.00038	0.911595	1.32316	1.05085		2.19457	2.35104								?	?
GB13884	GB49904	FBgn0000490	decapentaplegic	Immune system process (GO:0002376)	Immune syst		772.858	0.897818	0.258698	0.330994	0.279933	1.55648	117.613	0.462391	172.454	234.821	556.229	14.6879	701.076	0.790452	425.977		200.019	277.551		?
GB13967	GB40759	FBgn0043841	virus-induced RNA 1	Immune system process (GO:0002376)	Immune syst		20.7641	195.242	67.0895	66.3679	67.0634	62.615	25.7946	22.3255	61.0531	80.1774	16.2383	20.003	36.6229	36.114	67.1402		56.3074	44.2826			?
GB14060	GB48932	FBgn0260935	immune response deficient 1	Immune system process (GO:0002376)	Immune syst		11.0688	4.40343	3.98056	3.86218	3.54007	3.89178	17.9606	17.1644	3.14718	4.77752	3.44142	4.52581	6.04289	6.28013	7.34111		6.76186	4.83005								?	?
GB14141	GB52278	FBgn0014141	cheerio	Immune system process (GO:0002376)	Immune syst		5.03101	22.1315	37.3291	24.4383	46.0444	65.6391	32.4917	55.7969	42.8424	53.9502	7.17397	20.1648	13.6906	19.7545	25.6916		31.478	18.288
GB14169	GB50932	FBgn0003117	pannier	Immune system process (GO:0002376)	Immune syst		22.0953	3.27224	2.18184	1.97737	2.63497	3.2818	4.27253	2.92483	7.64224	10.4901	4.21786	2.22714	9.86914	4.15748	6.29379		5.83591	5.2558		?
GB14289	GB51067	FBgn0082598	akirin	Immune system process (GO:0002376)	Immune syst		6.16594	2.16012	1.95269	2.10802	1.11426	1.37678	2.09114	7.87111	3.90304	4.25841	1.65151	2.93429	3.49372	2.51709	1.8729		3.0314	1.87693									?
GB14441	GB56005	FBgn0026379	Pten	Immune system process (GO:0002376)	Immune syst		3.9375	1.74458	0.394261	0.788192	0.319968	1.06745	2.36441	0.411072	1.05073	2.19524	4.44601	0.799455	3.33465	1.112	0.796107		1.65077	1.33012												?
GB14446	GB44948	FBgn0259099	Doublecortin-domain-containing echinoderm-microtubule-associated protein ortholog	Immune system process (GO:0002376)	Immune syst		7.28583	4.10851	3.69946	3.33587	7.72033	11.765	6.51993	6.61234	8.4884	9.41648	5.72134	4.28657	5.86829	4.17368	7.9681		6.46467	2.38037							?
GB14487	GB44982	FBgn0010395	beta[nu] integrin	Immune system process (GO:0002376)	Immune syst		2.76987	2.0454	2.0768	0.682251	0.979386	0.658532	2.88525	2.50812	1.6754	3.58367	5.06371	1.31701	2.62935	0.692614	1.2694		2.05578	1.23285												?
GB14518	GB55704	FBgn0026207	members only	Immune system process (GO:0002376)	Immune syst		52.1606	10.0512	7.61303	5.09035	8.35582	13.7413	164.864	11.3395	102.669	32.0048	157.014	9.14009	62.8989	9.78219	19.0397		44.3843	54.537								?				?
GB14545	GB42785	FBgn0039702	Vacuolar protein sorting 16B	Immune system process (GO:0002376)	Immune syst		3.24017	5.93821	6.73761	7.37757	5.59517	12.3309	10.3095	9.26071	7.61677	5.3975	1.13085	6.2092	2.60976	15.5561	7.28966		7.10665	3.70662															?
GB14602	GB43446	FBgn0040505		Immune system process (GO:0002376)	Immune syst		14.4852	4.1135	3.23724	3.01713	3.47499	4.77906	4.25317	3.58632	5.64507	7.67835	4.85189	2.80426	9.58217	2.75666	7.28442		5.43663	3.20207		?
GB14619	GB42579	FBgn0262738	no receptor potential A	Immune system process (GO:0002376)	Immune syst		8.01649	2.55289	1.59911	1.85845	1.83852	4.28142	4.74931	1.71493	3.57985	17.8868	5.04919	1.01909	9.84913	1.39065	3.87478		4.61737	4.45161											?
GB14763	GB53451	FBgn0005630	longitudinals lacking	Immune system process (GO:0002376)	Immune syst		7.09985	0.786427	2.3919	1.77178	1.22601	4.54455	0	1.8001	2.68404	0.747682	0	0.437606	7.86292	0.177534	8.13444		2.64432	2.88317
GB14801	GB49927	FBgn0050420	Activating transcription factor-2	Immune system process (GO:0002376)	Immune syst		7.26766	1.51532	1.27349	0.581924	0.959698	0.820937	0.623446	1.95104	2.32728	2.161	2.46187	1.3175	3.78766	1.34694	2.05719		2.0302	1.67579		?
GB14813	GB42608	FBgn0264294	Cytochrome b5	Immune system process (GO:0002376)	Immune syst		37.7083	140.804	111.458	96.8437	112.971	137.841	54.3283	42.6195	108.821	136.642	43.6041	21.3377	51.3209	17.3813	77.4534		79.409	43.7508
GB14837	GB53251	FBgn0243511		Immune system process (GO:0002376)	Immune syst		9.86953	2.18643	1.1765	1.53767	0.677606	0.639352	4.33522	2.92441	3.50633	4.65832	10.2714	1.80297	13.6958	3.79998	4.57758		4.37727	3.89559														?
GB14882	GB53826	FBgn0011766	E2F transcription factor	Immune system process (GO:0002376)	Immune syst		2.67376	2.20777	1.55158	1.35654	1.13328	0.746815	0.708945	4.93023	3.30805	2.76453	1.39975	0.868944	2.69194	1.714	2.00512		2.00408	1.13962									?
GB14945	GB53149	FBgn0263289	scribbled	Immune system process (GO:0002376)	Immune syst		37.5059	12.0773	6.49765	4.51943	8.10455	5.03758	21.2207	15.4331	17.5724	29.7848	7.0814	10.9901	25.6485	11.7154	14.6525		15.1894	9.67553		?
GB15003	GB53487	FBgn0005630	longitudinals lacking	Immune system process (GO:0002376)	Immune syst		0	5.00774	4.16231	5.56221	3.75331	8.01372	7.60735	3.41672	13.41	6.59219	5.00667	3.0009	10.5915	2.73925	1.793		5.37713	3.46149										?
GB15155	GB48639	FBgn0004197	Serrate	Immune system process (GO:0002376)	Immune syst		24.2709	7.32163	6.73394	5.62339	7.98735	13.7979	13.1251	7.50036	18.3731	39.4348	14.1608	4.85619	19.4447	5.84396	14.1997		13.5116	9.23725											?
GB15156	GB53491	FBgn0005630	longitudinals lacking	Immune system process (GO:0002376)	Immune syst		14.9733	5.56416	4.5734	4.99679	5.75508	11.1302	10.5658	3.42896	14.6809	25.9415	11.1259	4.287	9.09371	5.72489	11.6213		9.56419	5.91917											?
GB15281	GB55293	FBgn0260934	par-1	Immune system process (GO:0002376)	Immune syst		49.3774	10.6675	13.3934	7.38779	12.1204	29.3858	19.341	27.3146	26.4728	44.8653	6.65825	24.4983	10.6205	13.2857	16.9718		20.824	12.9489		?
GB15447	GB45431	FBgn0014380	rho-like	Immune system process (GO:0002376)	Immune syst		5.71518	10.7384	11.575	12.5624	10.0518	4.2273	13.5822	25.7069	22.3739	10.8335	4.46948	12.8379	10.0802	22.802	11.0588		12.5743	6.43027									?
GB15719	GB50640	FBgn0086899	Tousled-like kinase	Immune system process (GO:0002376)	Immune syst		13.168	4.84999	5.01064	6.47691	5.67769	31.0881	10.3673	9.25803	10.9578	9.08597	3.25649	3.56516	9.84147	6.24198	7.66375		9.10062	6.72971							?
GB15805	GB40436	FBgn0023167	Small ribonucleoprotein particle protein SmD3	Immune system process (GO:0002376)	Immune syst		14.5073	84.8457	55.0479	83.4651	53.944	85.0598	21.1563	44.5061	71.516	56.8326	12.9955	33.0247	21.422	44.2566	69.8095		50.1593	25.5442
GB16114	GB54297	FBgn0021875	Zinc finger protein RP-8	Immune system process (GO:0002376)	Immune syst		2.49639	4.10825	2.73174	3.39807	2.95598	2.3284	11.9618	12.9752	5.17708	5.4081	4.79194	7.0779	13.8235	7.70478	6.37408		6.22088	3.84911
GB16187	GB49505	FBgn0036980	RhoBTB	Immune system process (GO:0002376)	Immune syst		6.94548	2.24561	1.23818	1.58421	0.875204	3.67675	3.28499	3.45053	3.40629	4.86299	5.0446	1.01816	7.27618	1.43633	2.58084		3.26176	2.03758
GB16396	GB41740	FBgn0021760	chromosome bows	Immune system process (GO:0002376)	Immune syst		8.18672	7.40566	10.0726	6.0465	10.1969	5.29848	13.0443	9.77293	8.59699	10.7289	4.0742	4.41054	5.79256	3.70755	8.75437		7.73928	2.77951
GB16409	GB43185	FBgn0031537	sec5	Immune system process (GO:0002376)	Immune syst		3.42433	2.47811	2.01583	2.28398	1.99077	1.622	1.66459	2.04029	2.69264	1.80307	1.09553	0.802035	0.884887	1.16452	2.74633		1.91393	0.744235		?
GB16431	GB52721	FBgn0002576	lozenge	Immune system process (GO:0002376)	Immune syst		32.7299	14.9636	6.4862	7.05403	7.95136	19.7178	9.35895	9.39668	26.4205	25.3439	14.4747	6.01246	23.099	6.61958	14.338		14.9311	8.6181		?
GB16457	GB45131	FBgn0003963	u-shaped	Immune system process (GO:0002376)	Immune syst		2.53176	0.593861	0.712981	0.587884	0.720073	1.60149	1.3031	1.00061	1.21609	1.78791	0.285872	0.49568	0.4948	0.580938	0.921394		0.988963	0.607247		?
GB16508	GB49120	FBgn0003079	pole hole	Immune system process (GO:0002376)	Immune syst		0.384699	0.511342	0.368346	0.261825	0.332152	0.295491	0.561014	0.121921	0.261778	0.9723	1.10767	0.521648	0.426046	0.346302	0.925591		0.493208	0.288249												?
GB16550	GB46540	FBgn0264294	Cytochrome b5	Immune system process (GO:0002376)	Immune syst		10.2168	5.59885	5.43472	6.25818	6.26774	3.61404	10.1943	7.19171	6.09849	8.32429	9.28973	3.71205	14.888	5.36496	4.99029		7.16295	2.98457														?
gb16573	GB49979	FBgn0043550	Tetraspanin 68C	Immune system process (GO:0002376)	Immune syst		23.1574	3.52698	2.66898	1.97011	3.41569	4.0763	6.33205	4.587	8.09789	9.7548	15.7433	5.35249	19.2348	3.76388	5.30639		7.79921	6.47109		?
GB16611	GB55798	FBgn0027491	Cdk5 activator-like protein	Immune system process (GO:0002376)	Immune syst		68.8928	10.7682	7.04433	7.91891	10.3764	6.02669	15.6283	11.6933	20.4882	46.9162	16.163	9.34181	38.5725	9.70446	17.365		19.7934	17.8801		?
GB16613	GB40656	FBgn0011823	Pendulin	Immune system process (GO:0002376)	Immune syst		5.17836	5.7359	5.57801	5.90334	3.46505	3.85325	3.77585	5.57993	5.28562	4.08998	8.07634	4.86739	5.73492	6.65236	6.89706		5.37823	1.26333												?
GB16680	GB51745	FBgn0037116	CG7158	Immune system process (GO:0002376)	Immune syst		1.76636	0.54783	0.676508	0.471254	0.463626	0.922595	2.88502	1.26292	1.92314	1.16073	2.03436	0.992905	1.33022	0.720826	0.58284		1.18274	0.702046								?
GB16711	GB41850	FBgn0029167	Hemolectin	Immune system process (GO:0002376)	Immune syst		9.84662	2.06376	1.841	1.45954	1.71866	1.06008	4.79941	3.57319	4.18999	5.31609	4.94178	2.21169	6.1726	1.97903	4.05039		3.68159	2.34301		?
GB16736	GB48230	FBgn0050420	Activating transcription factor-2	Immune system process (GO:0002376)	Immune syst		6.04876	1.52371	1.26627	1.14207	1.08663	0.880514	1.63616	1.63255	2.43421	4.13018	1.68545	0.968133	3.29541	0.790408	2.11259		2.0422	1.44582		?
GB16739	GB55914	FBgn0261524	licorne	Immune system process (GO:0002376)	Immune syst		5.20447	2.01769	1.93792	1.91276	1.43794	1.09934	4.17438	7.09255	2.1249	2.95963	3.49657	4.45887	2.88192	4.33363	1.60997		3.11617	1.66862									?
GB16821	GB52515	FBgn0002526	Laminin A	Immune system process (GO:0002376)	Immune syst		1.17322	5.45807	5.74157	3.35367	4.05187	3.60466	20.5312	22.6069	12.2413	17.7914	4.50411	35.5779	9.09523	21.1225	4.83907		11.4462	9.91724													?
GB16921	GB40741	FBgn0052133	ptip	Immune system process (GO:0002376)	Immune syst		7.44878	1.28559	0.903036	0.990345	0.673046	1.39711	3.78932	0.801544	2.63258	3.66675	3.15892	0.811455	10.7434	0.922631	3.27476		2.83328	2.85276														?
GB17030	GB50930	FBgn0003507		Immune system process (GO:0002376)	Immune syst		4.3808	5.48702	3.13697	5.57322	4.30613	11.1949	0.737146	2.66998	3.82182	5.96193	1.94057	2.13935	2.23922	3.1599	5.09639		4.12302	2.4816							?
GB17138	GB51962	FBgn0086902	kismet	Immune system process (GO:0002376)	Immune syst		25.3797	4.27825	2.70664	3.12346	2.21789	3.61971	2.47044	4.78314	4.41537	6.59748	4.78898	3.53866	10.9837	4.61644	7.98234		6.10015	5.80941		?
GB17192	GB52973	FBgn0260866	defense repressor 1	Immune system process (GO:0002376)	Immune syst		20.3829	3.31299	1.99171	1.88485	2.35287	1.95704	3.23095	2.62607	4.7741	4.96964	11.6952	3.15445	15.5807	2.69243	6.54901		5.81032	5.61486		?
GB17303	GB49949	FBgn0035850	Autophagy-specific gene 18	Immune system process (GO:0002376)	Immune syst		26.2157	5.46603	4.69214	4.03027	6.33774	2.72436	8.09595	8.32798	6.29616	8.18486	4.73621	5.77897	5.46509	4.39591	7.42062		7.2112	5.50705		?
GB17556	GB54853	FBgn0032006	PDGF- and VEGF-receptor related	Immune system process (GO:0002376)	Immune syst		13.8667	1.11707	0.643743	0.823646	1.3061	2.90485	3.30906	2.14142	3.20249	7.16871	6.29146	0.808066	7.25968	0.832175	3.81296		3.69921	3.63376		?
GB17628	GB46302	FBgn0262738	no receptor potential A	Immune system process (GO:0002376)	Immune syst		5.44069	1.32009	1.15765	0.899281	0.514491	0.995012	6.04515	1.80641	2.99706	5.23846	3.48122	1.50106	6.31237	0.796841	3.47296		2.79858	2.07729
GB17687	GB55584	FBgn0016794	daughter of sevenless	Immune system process (GO:0002376)	Immune syst		134.269	2.35579	1.39241	1.19299	1.33182	1.43615	2.89706	3.6887	8.85306	44.9669	2.24313	0.907531	44.5195	0.701293	1.36564		16.8081	35.773		?
GB17764	GB40429	FBgn0015790	Rab-protein 11	Immune system process (GO:0002376)	Immune syst		8.3345	43.2051	33.2509	57.632	32.5981	60.6572	26.7396	53.7793	24.5761	17.6418	6.39938	33.0826	8.30725	52.2058	35.8088		32.9479	18.0402
GB17971	GB51743	FBgn0000490	decapentaplegic	Immune system process (GO:0002376)	Immune syst		14.8019	1.70515	0.503919	0.48356	0.613445	0.568476	0.863439	1.27598	1.20868	3.55404	1.13652	0.21896	0.98357	1.11038	0.61052		1.97591	3.63522		?
GB18039	GB45082	FBgn0015296	SHC-adaptor protein	Immune system process (GO:0002376)	Immune syst		16.3915	0.706079	0.565138	0.537141	0.445542	1.80697	1.77067	1.50075	1.65244	4.98674	0.582671	1.02901	2.68936	1.13854	2.08667		2.52595	4.00724		?
GB18366	GB41829	FBgn0034366	Autophagy-specific gene 7	Immune system process (GO:0002376)	Immune syst		2.52538	1.97455	1.20111	1.23347	1.30826	0.741678	0.866545	3.25793	2.29128	5.35023	0.855457	1.72135	1.97422	2.96424	3.36994		2.10904	1.24662											?
GB18378	GB43282	FBgn0004435	G protein alpha49B	Immune system process (GO:0002376)	Immune syst		56.8541	10.6596	10.1966	8.23594	7.11553	9.26489	56.4786	101.565	27.6257	35.7589	24.7804	162.176	46.2126	74.4606	19.9899		43.425	43.0202													?
GB18613	GB52625	FBgn0003118	pointed	Immune system process (GO:0002376)	Immune syst		12.2942	34.3172	29.9641	36.2385	32.25	61.0811	19.3958	28.7764	63.8851	98.0206	9.01066	16.6846	11.0163	16.2486	34.7278		33.5941	24.2414											?
GB18619	GB50333	FBgn0261592	Ribosomal protein S6	Immune system process (GO:0002376)	Immune syst		117.576	707.684	721.679	742.221	741.487	2065.78	585.952	595.099	678.191	398.472	149.219	212.437	65.6446	673.242	963.562		627.883	482.528							?
GB18627	GB48763	FBgn0000022	achaete	Immune system process (GO:0002376)	Immune syst		7.48713	0.785676	0.335385	0.0536392	0.476327	1.36207	2.87332	0.19982	0.536295	3.98383	6.80774	0.194306	7.41901	0.295607	1.35445		2.27764	2.78848
GB18643	GB47453	FBgn0261797	Dynein heavy chain 64C	Immune system process (GO:0002376)	Immune syst		17.8288	2.95555	1.25161	1.17215	1.34039	1.90978	5.6599	1.76816	7.26274	25.7492	4.65623	1.13628	5.64145	0.928024	1.75087		5.40075	7.10695											?
GB18722	GB54764	FBgn0026404	Nedd2-like caspase	Immune system process (GO:0002376)	Immune syst		30.8918	56.0992	58.768	59.8655	53.976	36.6852	116.182	122.019	82.6091	60.6123	11.7036	58.1235	23.4082	81.474	39.9572		59.4917	31.044									?
GB18769	GB55827	FBgn0015521	Ribosomal protein S21	Immune system process (GO:0002376)	Immune syst		55.4276	449.829	404.14	530.897	427.473	2919.35	599.972	431.293	1050.41	526.321	89.9119	121.544	43.2287	240.224	315.555		547.038	705.87							?
GB18813	GB51292	FBgn0260642	Antennapedia	Immune system process (GO:0002376)	Immune syst		82.0479	5.19324	4.53071	5.90325	7.96114	16.8058	20.5118	11.0451	31.5492	41.9678	27.7491	7.1281	108.607	9.08579	12.0862		26.1448	30.5322														?
GB18882	GB42706	FBgn0011766		Immune system process (GO:0002376)	Immune syst		5.90305	1.97926	1.7822	1.7482	1.90094	2.05264	3.37362	2.22477	2.53317	4.08272	5.35934	1.39636	7.24426	1.86704	4.82567		3.21822	1.82855														?
GB18918	GB49657	FBgn0004606	Zn finger homeodomain 1	Immune system process (GO:0002376)	Immune syst		62.3706	73.419	63.6063	64.4274	74.9136	30.332	192.407	286.327	219.909	297.902	30.4621	240.801	64.9868	153.403	61.2689		127.769	94.743
GB18989	GB42321	FBgn0000543	ecdysoneless	Immune system process (GO:0002376)	Immune syst		32.1251	1.22703	1.10781	0.934887	0.688644	0.255265	12.2776	3.93209	5.22638	6.01956	8.9309	1.25632	14.9673	2.82539	4.26447		6.40258	8.37749		?
GB19031	GB46056	FBgn0032209	Hand	Immune system process (GO:0002376)	Immune syst		4.50284	1.99506	1.67666	2.23279	1.99943	7.04087	12.6641	5.3413	4.23133	4.0645	1.23477	1.46698	11.0422	2.36449	13.0449		4.99348	4.10836
GB19155	GB49172	FBgn0000541	Enhancer of bithorax	Immune system process (GO:0002376)	Immune syst		105.455	3.16414	2.19065	2.30062	1.66481	2.10275	32.69	4.02869	20.6802	22.236	113.322	3.56049	56.8569	3.3691	4.99109		25.2409	37.533		?										?
GB19160	GB45689	FBgn0038760	Mediator complex subunit 25	Immune system process (GO:0002376)	Immune syst		3.50453	3.13654	2.93798	3.51098	2.39646	12.1672	1.431	2.29244	2.28936	1.94864	3.76719	3.12776	4.03644	3.23887	3.56551		3.55673	2.49171							?
GB19168	GB47837	FBgn0011764	Dorsal switch protein 1	Immune system process (GO:0002376)	Immune syst		6.83732	11.2088	9.16534	11.4475	6.6118	7.87773	3.9884	6.93416	6.51367	10.3685	6.56228	8.76564	9.08662	10.053	9.87041		8.35274	2.09697								?
GB19246	GB44931	FBgn0028436	ECSIT	Immune system process (GO:0002376)	Immune syst		2.37888	6.21863	4.85922	10.0382	3.77926	1.82725	7.63218	11.8216	6.47508	3.00623	1.82655	9.20804	1.58074	24.8408	6.54129		6.80226	5.92639															?
GB19301	GB47805	FBgn0043575	PGRP-SC2	Immune system process (GO:0002376)	Immune syst		9.40161	18.4364	8.85377	7.44146	12.7473	15.3791	8.63257	5.56195	27.0119	40.0432	2.6736	4.33535	6.17012	1.09709	2.87243		11.3772	10.4591											?
GB19311	GB49159	FBgn0031145	Nuclear transport factor-2	Immune system process (GO:0002376)	Immune syst		9.55468	8.23154	8.13201	10.1156	8.06624	6.5236	1.5482	2.15333	5.7793	5.3664	0	1.57043	1.17573	10.0345	10.947		5.94657	3.76364
GB19423	GB45127	FBgn0028541	TM9SF4	Immune system process (GO:0002376)	Immune syst		2.99498	1.32698	0.902783	0.679458	0.833229	1.34194	0.727939	1.83509	1.20771	3.25913	0.319389	1.1281	0.737083	0.94861	0.915042		1.27716	0.831021		?									?
GB19455	GB43567	FBgn0020377	Scavenger receptor class C, type II	Immune system process (GO:0002376)	Immune syst		10.4963	2.19164	1.87396	2.72612	2.14585	2.27042	4.92637	7.14251	5.14475	6.17476	2.08429	2.79601	2.13782	3.96409	2.15635		3.88208	2.48706		?
GB19525	GB47743	FBgn0261854	atypical protein kinase C	Immune system process (GO:0002376)	Immune syst		34.047	5.08048	4.18522	3.40981	5.17864	9.28188	5.40249	5.41196	12.8845	22.6275	5.75664	4.06656	11.9175	4.04945	4.3657		9.17769	8.56624		?
GB19541	GB47201	FBgn0004657	myospheroid	Immune system process (GO:0002376)	Immune syst		4.35474	4.42163	4.01519	2.98852	3.38392	2.9268	5.02756	4.16339	7.49054	8.14007	2.43808	1.9907	5.02373	5.22679	4.73985		4.4221	1.69389											?
GB19783	GB45615	FBgn0029167	Hemolectin	Immune system process (GO:0002376)	Immune syst		0	3.21009	1.11337	0.657472	0.973081	1.54586	2.34795	0.510262	0.365196	0	0	1.48854	4.4577	1.44934	0		1.20792	1.29617														?
GB19857	GB46039	FBgn0003884	alpha-Tubulin at 84B	Immune system process (GO:0002376)	Immune syst		90.6529	179.008	343.03	152.189	661.915	601.431	444.342	246.584	209.685	184.568	71.431	55.185	26.0286	21.4926	193.493		232.069	199.304						?
GB19881	GB42786	FBgn0027066	Eb1	Immune system process (GO:0002376)	Immune syst		33.6992	5.98649	3.07785	2.98596	2.79982	5.1281	2.78175	3.62722	8.22071	29.9309	3.66154	2.58656	10.5626	4.43588	5.24512		8.31531	9.81988		?									?
GB19884	GB46165	FBgn0010389	heartless	Immune system process (GO:0002376)	Immune syst		11.6679	2.58484	1.8808	1.49198	0.97689	2.85163	2.32031	3.3617	2.88718	2.45749	2.71481	1.98315	3.1326	1.72404	1.94446		2.93199	2.50218		?
GB19895	GB50933	FBgn0003117	pannier	Immune system process (GO:0002376)	Immune syst		13.5847	11.2353	18.2101	11.7523	6.5683	5.21727	5.72312	13.7771	8.35387	10.3003	4.63581	30.143	7.02088	22.7818	15.7718		12.3384	7.13602													?
GB19906	GB45031	FBgn0014179	glial cells missing	Immune system process (GO:0002376)	Immune syst		15.244	1.38152	0.939894	0.66023	1.376	1.59669	5.81028	1.60309	5.02941	5.91058	7.64792	1.00364	13.8129	1.14354	3.69155		4.45675	4.65909		?												?
GB19961	GB42981	FBgn0040323	Gram-negative bacteria binding protein 1	Immune system process (GO:0002376)	Immune syst		7.24063	2.17691	2.83366	0.985591	3.617	1.48971	13.1989	2.72091	9.15026	9.31349	7.44574	3.44276	12.0283	1.4355	3.55531		5.37564	4.02457
GB19984	GB45510	FBgn0004009	wingless	Immune system process (GO:0002376)	Immune syst		11.5423	2.15851	1.92965	1.4283	2.79557	6.04483	4.80924	3.24949	5.71217	6.63008	1.72644	1.53371	4.81432	2.00159	3.50357		3.99198	2.72594		?
GB11057	GB47454	FBgn0015247	Iap2	Imd-Pathway_peptidoglycan recognition protein signaling pathway ; GO:0061057	Imd-Pathway		3.4533	2.70008	2.89589	2.79272	2.52559	2.41847	1.77742	4.66103	2.67242	1.54023	2.33957	2.97987	2.92458	4.60199	3.49105		2.91828	0.868251									?
GB15371	GB47804	FBgn0037906	PGRP-LB	Imd-Pathway_peptidoglycan recognition protein signaling pathway ; GO:0061057	Imd-Pathway		2.45331	0.905818	0.652507	0.222629	0.635462	0.471104	0.596286	1.29586	5.37923	20.6686	0.784875	1.31051	1.81133	1.4723	1.96757		2.70849	5.12498											?
GB15528	GB44455	FBgn0034647	pirk	Imd-Pathway_peptidoglycan recognition protein signaling pathway ; GO:0061057	Imd-Pathway		4.68528	4.89318	1.92262	3.82655	2.19602	7.96881	5.85655	1.27276	9.41283	10.1501	1.2848	1.07262	5.93011	0.803361	5.06128		4.42246	3.05848
GB16425	GB45352	FBgn0020381	Dredd	Imd-Pathway_peptidoglycan recognition protein signaling pathway ; GO:0061057	Imd-Pathway		1.24327	3.0756	2.90993	1.77696	2.79097	0.875391	3.02182	5.30622	3.66607	2.48765	1.19326	2.29891	2.52432	2.17619	1.282		2.4419	1.13763									?
GB17188	GB42500	FBgn0035976	PGRP-LC	Imd-Pathway_peptidoglycan recognition protein signaling pathway ; GO:0061057	Imd-Pathway		12.1931	1.52675	1.4664	1.01026	1.46471	0.678669	13.9159	2.509	7.13469	8.7092	5.08808	2.15657	9.58949	1.32561	1.94363		4.71414	4.45747								?
GB17514	GB48951	FBgn0034068	casp	Imd-Pathway_peptidoglycan recognition protein signaling pathway ; GO:0061057	Imd-Pathway		12.8353	5.50916	3.84051	4.17127	2.7151	3.38899	4.21153	10.617	4.00311	6.28529	3.07973	3.38201	4.97517	6.0178	4.52198		5.3036	2.83478		?
GB18606	GB45648	FBgn0013983	imd	Imd-Pathway_peptidoglycan recognition protein signaling pathway ; GO:0061057	Imd-Pathway		0	1.4075	1.6335	0.720691	1.18855	2.0334	0	3.22172	1.20093	2.00724	1.01631	1.30534	1.17272	0.794349	1.81982		1.30147	0.811271									?
GB14664	GB48187	FBgn0026323	Tak1	Imd-Pathway	Imd-Pathway		11.8476	11.302	12.7588	12.6712	14.7803	20.0578	8.46251	12.23	17.879	11.7637	6.49773	6.82551	10.1755	12.624	12.7984		12.1783	3.60861							?
GB17106	GB49918	not found	IKKgamma-kenny	Imd-Pathway	Imd-Pathway		522.375	91.6975	81.7744	79.0346	98.3006	180.977	238.275	164.473	279.192	351.462	220.908	107.567	285.063	89.5993	181.99		198.179	124.093		?
GB18650	GB41606	FBgn0086358	Tab	Imd-Pathway	Imd-Pathway		7.05356	30.4959	51.5848	14.5877	35.4797	21.0599	22.5636	67.4675	38.9142	39.6803	6.55143	112.643	17.1353	150.614	45.9858		44.1211	39.9373															?
GB19498	GB45752	FBgn0000173	dUbc13	Imd-Pathway	Imd-Pathway		4.94075	2.50944	2.0128	1.77155	1.78959	3.84132	2.28457	2.42898	2.73338	4.26399	1.3879	0.727896	3.06953	1.62718	2.73371		2.54151	1.12564		?
GB30399	GB55968	not found		Imd-Pathway	Imd-Pathway		66.6865	5.69573	7.18011	6.45256	4.43972	1.54285	3.51507	9.98168	6.19626	16.2454	0	6.53684	5.33883	3.73684	1.65696		9.68036	16.238		?
GB10469	GB52343	FBgn0037107		IG Superfamily Genes	IG Superfam		4.34463	6.65932	8.98197	6.63314	6.63046	6.7645	10.9593	11.2089	8.78932	9.49686	4.05716	7.10717	4.29141	5.58461	7.50695		7.26771	2.25899
GB10912	GB53701	not found		IG Superfamily Genes	IG Superfam		55.4092	10.3855	6.96089	6.78723	9.24885	11.9572	45.7514	10.2679	36.1217	32.1842	232.986	8.27147	90.8247	9.33326	19.6805		39.078	58.6809												?
GB11115	GB47239	FBgn0029082		IG Superfamily Genes	IG Superfam		8.57846	0.963591	0.642707	0.41116	0.500734	1.90252	1.93819	0.96496	2.13765	3.43544	4.4066	0.774495	9.36665	0.54382	2.82397		2.62606	2.83612		?												?
GB11358	GB55483	FBgn0005666		IG Superfamily Genes	IG Superfam		26.4173	104.791	81.593	99.8374	98.3312	260.581	63.965	60.2156	78.3355	54.4815	34.7572	44.8532	32.9679	114.216	103.526		83.9246	56.7684							?
GB11807	GB53012	FBgn0010473		IG Superfamily Genes	IG Superfam		27.9154	35.3382	37.3649	44.5642	29.1144	38.2229	23.6672	29.379	51.6935	61.3077	16.841	19.0441	20.8153	8.54287	50.8474		32.9772	14.6348
GB11846	GB44650	FBgn0002968	Neuroglian	IG Superfamily Genes	IG Superfam		4.91066	11.1839	13.2775	11.3145	10.7549	2.71395	26.1999	37.0327	25.2928	18.7305	8.96642	5.10115	4.90787	4.45646	3.70509		12.5699	10.0677									?
GB11918	GB49767	not found		IG Superfamily Genes	IG Superfam		35.0936	10.1665	4.31856	4.96065	5.11906	8.23647	9.47734	7.59849	11.0217	18.2258	14.0101	4.71429	16.9413	5.31015	13.265		11.2306	7.97859		?
GB12490	GB53013	FBgn0028482		IG Superfamily Genes	IG Superfam		14.2545	9.15779	6.04438	7.62269	5.55594	28.624	7.72114	8.5706	10.716	10.0362	3.12711	4.09173	6.31464	3.91064	9.65904		9.02709	6.17128							?
GB12933	GB40916	not found		IG Superfamily Genes	IG Superfam		55.5927	4.39844	4.38779	2.50604	3.78694	5.82291	28.691	12.7221	28.3721	29.5954	61.152	8.54402	67.6645	7.31162	24.3814		22.9953	22.2916														?
GB13261	GB44117	FBgn0000547		IG Superfamily Genes	IG Superfam		19.7713	5.00202	3.65921	2.42054	4.26261	11.5921	132.734	4.53824	43.0417	15.3016	950.37	6.6195	397.372	3.98435	9.16818		107.322	254.782												?
GB14317	GB49171	FBgn0021764		IG Superfamily Genes	IG Superfam		25.2316	4.4996	2.41042	2.25074	2.24273	3.60366	8.3437	5.14245	7.42323	16.232	7.57799	3.49121	14.5103	3.85421	5.74234		7.50375	6.45764		?
GB14520	GB46360	FBgn0000635		IG Superfamily Genes	IG Superfam		22.2926	16.5921	11.3294	9.95477	13.321	7.51449	18.9445	21.4901	65.3345	96.6748	11.6984	8.12553	17.0511	6.25608	12.5684		22.6099	24.9164											?
GB14642	GB47977	FBgn0086906		IG Superfamily Genes	IG Superfam		28.8488	52.7385	34.3158	50.9701	39.9842	24.539	35.4249	43.5007	64.0995	45.0915	47.0208	39.0813	34.3017	118.731	62.3628		48.0673	22.5566															?
GB15344	GB41645	FBgn0000464		IG Superfamily Genes	IG Superfam		36.7516	25.7958	24.4016	23.1421	25.155	34.1484	37.3333	33.9845	48.9919	55.5732	22.6858	19.2361	27.7772	17.2032	39.4499		31.442	10.8983											?
GB15987	GB45774	FBgn0259141		IG Superfamily Genes	IG Superfam		33.6933	4.75071	4.31215	4.21814	4.09009	8.33982	15.0449	7.4503	14.6539	21.0452	24.5501	5.52521	30.5106	4.27825	12.1653		12.9752	10.0891		?
GB16060	GB46759	FBgn0037736		IG Superfamily Genes	IG Superfam		405.807	41.4433	106.617	33.1072	130.476	31.4732	381.523	717.524	190.597	321.93	196.289	4577.68	317.387	1740.86	347.289		636.001	1170.33													?
GB30209	GB44159	not found		IG superfamily genes	IG superfam		9.65682	42.038	44.5867	70.4433	47.0833	80.1334	42.556	26.4106	88.7175	83.0236	11.1423	20.1135	7.36358	32.0722	55.6103		44.0634	27.1259
GB11717	GB49260	FBgn0061354	CTL1	C-lectin domain	C-lectin do		7.57906	22.0137	2.59814	45.7597	5.06054	14.0364	2.70177	1.40917	89.8526	6.4916	9.6989	8.65771	11.9376	50.5124	60.9001		22.614	26.5804										?
GB11792	GB55225	FBgn0001083	CTL6	C-lectin domain	C-lectin do		15.5978	1.87	1.29825	1.09905	1.1566	1.97331	7.76059	2.96601	7.07593	8.87002	6.34038	2.26208	8.23065	1.07372	3.46902		4.73623	4.1615		?
GB11810	GB44210	FBgn0037240	CTL10	C-lectin domain	C-lectin do		24.4051	1.02886	0.668478	0.656965	0.691901	1.67873	3.7184	1.45457	3.13964	4.66069	5.06923	1.20114	9.27831	1.01102	3.81861		4.16544	6.07649		?
GB13808	GB43983	FBgn0030617	CTL12	C-lectin domain	C-lectin do		22.1448	2.84612	3.16522	2.40456	3.28396	4.51209	9.98406	6.09677	11.4647	17.7307	13.953	6.25151	19.6573	3.6014	12.6665		9.31751	6.65181
GB14265	GB45248	FBgn0032180	CTL2	C-lectin domain	C-lectin do		10.9877	2.43415	1.94827	2.07559	1.85865	3.818	4.90519	2.9185	6.88347	5.95087	4.30438	1.78754	10.0992	2.0298	7.81024		4.6541	3.07165		?
GB14382	GB51399	FBgn0013997	CTL8	C-lectin domain	C-lectin do		15.7471	1.24473	1.17193	0.956018	0.625552	2.1295	4.20474	3.28963	2.91784	3.36336	4.5412	1.0754	9.08825	1.58614	3.10014		3.66944	3.96046		?
GB14975	GB52656	FBgn0031629	CTL7	C-lectin domain	C-lectin do		40.5227	33.0042	59.0244	34.5557	65.5503	145.331	140.785	67.3109	53.5273	97.5234	48.0438	34.8938	56.0976	44.7036	64.7257		65.7066	35.5111							?	?
GB15050	GB47095	not found	CTL9	C-lectin domain	C-lectin do		7.74811	3.26129	3.95666	5.69521	2.8097	0.59514	9.03938	4.71471	4.21791	5.38527	1.48729	4.87114	6.00661	8.13724	7.98945		5.06101	2.47267
GB17330	GB40445	FBgn0031918	CTL5	C-lectin domain	C-lectin do		49.7366	260.317	255.966	251.761	286.415	71.477	207.301	191.269	407.444	190.384	43.7322	80.2189	31.9832	237.342	207.349		184.846	108.322										?
GB18049	GB46626	FBgn0035199	CTL3	C-lectin domain	C-lectin do		203.039	6.28023	6.68406	5.52752	7.40914	15.3014	54.7499	10.7814	48.6612	84.237	141.19	10.0116	211.285	6.09247	75.845		59.1397	71.818		?												?
GB19013	GB43691	FBgn0038017	CTL11	C-lectin domain	C-lectin do		6.66915	3.06853	47.9742	2.9329	55.9873	116.048	78.5542	33.4278	4.88728	7.13131	2.95425	7.01963	1.70445	2.38601	8.1112		25.2571	34.7359							?
GB20122	GB47938	FBgn0031879	CTL4	C-lectin domain	C-lectin do		4.87552	4.53638	3.52329	3.40184	5.09512	7.00442	3.3707	2.71951	5.88169	6.321	1.66378	1.48695	2.75976	2.04273	3.52537		3.88054	1.68993
GB10036	GB47618	FBgn0010385	Defensin-2	Antimicrobial peptide - AMP	Antimicrobi		0	0.584586	0.280738	0.179597	0.227837	0.506725	1.92412	0.167262	0.598549	0.833677	0	0.162646	2.92243	0.791811	0		0.611998	0.807149														?
GB17538	GB51223	not found	Hymenoptaecin	Antimicrobial peptide - AMP	Antimicrobi		15.5297	2.93066	5.6908	1.95731	120.08	6.18515	22.6472	11.5935	17.743	30.8913	26.4977	52.9643	107.652	1.63959	6.32628		28.6885	37.2762						?								?
GB17782	GB47546	not found	Apidaecin	Antimicrobial peptide - AMP	Antimicrobi		20.0804	18.3815	71.7478	19.3912	216.032	29.8294	33.7038	26.3686	27.1565	76.8459	46.5452	65.8537	160.705	0.454747	0.781354		54.2585	60.0411						?
GB18323	GB47318	not found	abaecin	Antimicrobial peptide - AMP	Antimicrobi		165.19	15.4385	20.0456	13.3508	279.012	46.5902	150.562	8.83455	21.0764	68.497	29.7271	383.084	457.36	4.2597	1.77432		110.987	148.342														?
GB19392	GB41428	FBgn0010385	Defensin-1	Antimicrobial peptide - AMP	Antimicrobi		9.12314	16.1687	0.647061	0.910681	4.51614	2.56945	68.2962	2.00468	5.51828	13.4506	4.66995	31.1147	111.141	0.0912507	1.67241		18.1262	31.247														?
GB19468	GB53576	not found	apisimin	Antimicrobial peptide - AMP	Antimicrobi		58.7167	37.1443	10.4807	8.25891	7.77345	16.0359	14.2713	3.88718	33.74	24.7337	2.50466	2.81483	520.22	1.85976	21.9758		50.9611	130.785														?
GB10896	GB53625	FBgn0051997	Vago	Vago orthologue	Vago orthol		29.1035	27.585	203.099	62.1311	256.561	138.514	536.168	983.357	44.622	34.9163	17.6789	87.5566	12.2398	16.9683	128.65		171.943	263.344									?
GB12654	GB48208	FBgn0262739	AGO1 argonaute 1	RNAi	RNAi		23.813	2.689	2.56298	2.08106	2.70404	3.95	9.59382	6.61312	13.4089	19.2617	17.6082	5.4369	12.6218	3.65611	5.15935		8.74399	7.00373		?
GB19288	GB48923	FBgn0034246	Dicer-2	RNAi	RNAi		5.04026	3.8283	2.68111	2.6463	2.24937	0.829603	3.72289	5.36059	4.27608	3.35017	5.90553	3.58269	6.88686	5.1559	3.82482		3.95603	1.55157							?
GB19389	GB49909	FBgn0250816	argonaute 3	RNAi	RNAi		13.7793	0.389054	0.546139	0.753931	0.4199	0.622591	3.74312	0.856279	2.57393	2.4754	3.11177	0.682772	4.93716	0.5067	0.928662		2.42178	3.44981		?
																										0.331461	0.011236	0	0.00280899	0.00842697	0.0842697	0.0393258	0.0730337	0.0308989	0.0955056	0.0477528	0.0140449	0.120787	0.0140449	0.011236

## Sheet: data
	1	2	3	4	5	6	7	8	9	10	11	12	13	14	15	16
name	ID	G1	G2	G3	G4	G5	H1	H2	H3	H4	H5	I1	I2	I3	I4	I5
PREDICTED: Apis mellifera uncharacterized LOC102653755 (LOC102653755), transcript variant X2, mRNA	GB40001	0	0	0.154702	0.197936	0	0	0	0	1.31934	0	0	0.89627	0	0	0
#N/A	GB40002	7.33091	0	0.259973	0	0.42197	0	0	1.5489	1.10855	3.08806	4.69067	2.10862	0	0.733245	0
PREDICTED: Apis mellifera uncharacterized LOC102653755 (LOC102653755), transcript variant X2, mRNA	GB40003	0	0	0	0	0	0	0	0	0.950993	0	0	1.03367	0	0	0
#N/A	GB40004	0	0	0	0	0	0	0	0	1.33818	0	0	0	0	0	0
#N/A	GB40005	5.03627	2.86895	1.22468	1.1752	0.86967	3.86841	8.39371	1.45931	2.93748	2.27301	11.0484	1.33035	6.37436	3.0224	4.45127
PREDICTED: Apis mellifera nesprin-1-like (LOC551356), mRNA	GB40006	3.05341	2.24673	2.06509	1.4547	2.54218	17.297	1.90837	2.3225	2.07777	7.09715	3.7679	0.672143	2.65696	1.24344	3.07356
PREDICTED: Apis mellifera nesprin-1-like (LOC551356), mRNA	GB40007	8.27794	7.4773	2.28757	2.89198	2.65974	10.6399	6.42837	3.83371	7.19666	14.1531	8.60907	1.86712	7.29437	6.25975	5.40864
PREDICTED: Apis mellifera nesprin-1-like (LOC551356), mRNA	GB40008	10.045	20.2502	18.6348	28.5428	22.3761	36.2636	35.0656	46.6942	22.756	22.9285	14.9434	18.6127	10.6379	55.2057	42.3378
#N/A	GB40009	30.0571	79.185	75.5572	143.275	95.3201	85.8255	43.8328	69.6749	99.0837	60.4119	79.4921	72.8217	40.8961	209.8	158.344
PREDICTED: Apis mellifera uncharacterized LOC551319 (LOC551319), transcript variant X2, mRNA	GB40010	14.3769	24.4316	22.6165	34.2118	25.0782	23.5196	22.2865	35.4345	38.2521	26.6686	17.4166	32.0739	15.963	86.9642	46.786
PREDICTED: Apis mellifera uncharacterized LOC102655530 (LOC102655530), mRNA	GB40011	0.909635	0	0	0.123819	0.157077	0	0	0.576574	0.825311	0	0	0.224265	0	0	0
PREDICTED: Apis mellifera fuseless (fusl), transcript variant 2, mRNA	GB40012	8.98977	2.01612	2.47956	2.14522	2.08898	4.85917	1.78036	3.92541	2.46706	2.59468	1.27824	1.16291	4.79362	0.965772	3.58584
PREDICTED: Apis mellifera acylphosphatase-2-like (LOC724904), transcript variant X1, mRNA	GB40013	27.5813	85.3775	43.5389	132.62	46.0831	229.891	40.2224	32.4134	65.6048	7.06519	24.3254	53.2054	12.3834	165.635	140.409
PREDICTED: Apis mellifera exportin-1 (emb), transcript variant X3, mRNA	GB40014	2.14363	1.77566	1.59639	1.44626	1.33581	12.886	4.07751	3.17827	2.02947	1.59003	1.25233	0.792747	117.978	1.38433	1.4736
PREDICTED: Apis mellifera stAR-related lipid transfer protein 3-like (LOC551111), transcript variant X1, mRNA	GB40015	25.3096	0.631766	0.284433	0.339661	0.400116	0.0684527	13.2562	0.655259	8.0857	22.1862	23.2651	1.12055	21.5159	1.14987	4.65597
PREDICTED: Apis mellifera diacylglycerol kinase 1 (Dgk), transcript variant X1, mRNA	GB40016	66.5101	8.67117	10.7358	7.40916	8.58079	7.69243	18.7297	9.32312	26.3574	38.547	27.0013	9.68781	39.9619	8.44169	18.7089
PREDICTED: Apis mellifera enhancer of mRNA-decapping protein 4 homolog (Ge-1), mRNA	GB40017	2.47834	1.4824	1.22165	0.775906	0.912988	1.17391	2.16853	1.74894	2.54841	2.45334	1.90292	0.987816	1.00639	1.17746	1.30616
PREDICTED: Apis mellifera probable small nuclear ribonucleoprotein Sm D2-like (LOC414039), transcript variant 1, mRNA	GB40018	107.298	12.4379	11.548	21.9081	9.69511	25.396	20.0143	20.4034	28.866	43.3588	62.2683	10.9199	118.831	17.5957	37.7379
PREDICTED: Apis mellifera galactose-1-phosphate uridylyltransferase (LOC724540), mRNA	GB40019	10.7005	44.8178	23.9777	38.3256	16.4568	6.6781	19.0184	28.8259	18.507	13.945	1.28376	17.2717	4.44398	62.1097	33.7912
PREDICTED: Apis mellifera Rab39 protein (Rab39), transcript variant X1, mRNA	GB40020	9.68318	3.0148	3.03483	4.91604	2.44037	1.30663	7.25141	6.96712	6.17362	6.11839	7.03303	5.64571	10.7239	4.00497	4.67756
PREDICTED: Apis mellifera uncharacterized LOC725387 (LOC725387), mRNA	GB40021	3.49258	15.7254	5.56348	6.14177	5.10193	3.91528	9.63598	12.7442	17.2144	27.615	4.16746	6.23698	6.69052	2.84658	3.76359
PREDICTED: Apis mellifera aminoglycoside phosphotransferase domain-containing protein 1-like (LOC725458), transcript variant X3, mRNA	GB40022	2.93671	2.68364	2.77282	1.84881	2.15524	2.11473	2.14133	2.51294	1.6653	2.31948	1.40929	1.90057	2.43925	1.1015	4.28992
#N/A	GB40023	49.5569	2.1957	0.702967	1.34913	1.42626	8.24746	7.22698	0.837647	2.99753	8.35011	9.51268	2.85086	27.4416	2.97404	5.67784
#N/A	GB40024	0	1.44075	0.864871	0.663943	0.28076	0	2.37106	0.824455	0	0	0	0.200426	0	0	3.35305
PREDICTED: Apis mellifera ADAMTS-like protein 1-like (LOC410696), mRNA	GB40025	700.419	39.0938	26.9032	16.5918	27.0172	41.2233	153.878	59.7331	159.285	277.034	474.936	46.6471	737.418	37.3939	401.451
PREDICTED: Apis mellifera ADAMTS-like protein 1-like (LOC410696), mRNA	GB40026	47.9219	22.1694	13.6455	26.668	27.4218	11.9089	74.6816	15.1281	84.6146	70.3561	38.7794	11.8149	56.1944	27.2085	34.8809
PREDICTED: Apis mellifera ADAMTS-like protein 1-like (LOC410696), mRNA	GB40027	18.0694	1.56568	1.03095	1.19013	0.880717	1.56702	3.82515	2.33685	3.83417	8.05658	4.33564	1.46401	7.26225	1.06035	3.60625
PREDICTED: Apis mellifera DNA mismatch repair protein spellchecker 1 (spel1), mRNA	GB40028	10.2876	23.3529	8.91217	9.09315	7.68269	7.44022	44.4234	20.5787	41.8816	44.2359	48.7277	10.4913	23.0826	5.37207	6.79651
PREDICTED: Apis mellifera uncharacterized LOC100578186 (LOC100578186), partial mRNA	GB40029	22.3744	0.84369	0.329199	0.259199	0.534333	0.36566	1.73559	1.75013	3.99527	11.2799	5.02591	0.792231	11.8624	0.642805	3.59978
PREDICTED: Apis mellifera adenylyltransferase and sulfurtransferase MOCS3 (LOC724496), mRNA	GB40030	5.32981	24.4907	14.7976	24.5029	9.88643	3.6977	19.5568	22.1443	17.393	10.8635	3.30026	13.2887	5.33142	34.8488	19.3831
PREDICTED: Apis mellifera proteasome subunit alpha type-6-like (LOC100578243), mRNA	GB40031	5.04506	36.4035	30.2104	51.7011	24.1443	53.9755	69.3689	86.7067	48.0625	24.5913	5.53385	31.6288	2.39456	72.9886	40.6268
PREDICTED: Apis mellifera rRNA-processing protein UTP23 homolog (LOC550996), mRNA	GB40032	6.72718	12.5019	11.4908	15.3634	12.262	0.861203	13.6255	28.3795	26.9574	15.5856	2.86959	21.515	1.6556	28.5405	11.8181
PREDICTED: Apis mellifera rab3 GTPase-activating protein non-catalytic subunit-like (LOC100578281), mRNA	GB40033	8.27897	10.0694	5.82007	12.3631	5.66243	16.2096	7.22035	9.91907	9.09481	2.05142	2.64864	10.0255	2.51692	19.8859	10.9919
PREDICTED: Apis mellifera uncharacterized LOC102655530 (LOC102655530), mRNA	GB40034	3.41301	4.53658	3.63103	5.11035	2.94682	0	0	3.46135	9.28987	10.7827	0	4.62801	11.3395	13.8256	2.34621
#N/A	GB40035	1.17322	0.519816	0.624083	0.798492	0.607781	18.0233	0	0.44619	0.532232	2.96524	11.2603	0.578502	0	4.04847	5.64558
PREDICTED: Apis mellifera uncharacterized LOC102655871 (LOC102655871), mRNA	GB40036	23.3617	0.166948	0.160348	0	0.130133	0	1.09899	0.477673	1.70936	2.38085	10.126	1.02188	7.51139	0.226129	6.21661
PREDICTED: Apis mellifera kinesin-like protein unc-104-like (LOC727484), mRNA	GB40037	19.0259	1.23967	0.357199	0	0.57978	1.71929	1.63211	3.97258	6.60025	16.2646	15.0381	3.58702	14.8735	1.17538	3.84677
PREDICTED: Apis mellifera bumetanide-sensitive sodium-(potassium)-chloride cotransporter-like (LOC552136), mRNA	GB40038	13.8815	0.615043	0.295364	0.472385	1.07868	0	3.03655	0.967869	9.446	7.0169	10.6585	1.2834	23.0602	0.3124	13.3596
#N/A	GB40039	1.25524	0	0.267085	0.170863	1.5173	0	1.83054	0.318255	1.13888	3.17253	0	0.464208	0	0.376652	0.862893
PREDICTED: Apis mellifera uncharacterized LOC102656364 (LOC102656364), partial mRNA	GB40040	0	0.198455	0.190609	0	0.309384	1.03214	0	0	0	0	0	0.11043	0.992104	0.268804	0.615817
#N/A	GB40041	14.8007	0.319887	0.0384051	0.049138	0.187009	0	0	0.045763	0.655055	1.36857	2.07882	0.178001	4.79748	0.162481	1.98526
#N/A	GB40042	2.37683	0.131637	0	0.24265	0	0	0	0.0753279	1.34781	11.2636	1.14061	0.0732491	2.63229	0.1783	0.816955
#N/A	GB40043	0	0	0	0.099847	0	0	0	0.0929892	0	0.463483	0	0.090423	0.812363	0	0
#N/A	GB40044	0	0	0.196799	0	0	0	0	0.0586259	0.419587	0.292207	0.887708	0.057008	2.04865	0	0
PREDICTED: Apis mellifera homoserine O-acetyltransferase-like (LOC102654407), partial mRNA	GB40045	0.347914	0	0.0740277	0.0947159	0.0600783	0.267237	189.249	0.264631	0.157831	0.659497	812.759	9.09227	3.85308	0.57418	1.67417
PREDICTED: Apis mellifera mitochondrial Rho (Miro), transcript variant X1, mRNA	GB40046	2.82859	1.56657	1.50464	0.770053	1.95378	1.08634	0	0.358582	2.56638	9.82997	0	1.04606	4.69891	3.39503	3.88893
PREDICTED: Apis mellifera protein maelstrom 2-like (LOC100576828), transcript variant X1, mRNA	GB40047	3.63854	0.403029	0.497696	0.0353769	0.448791	0.598886	1.51604	0.988412	2.24013	0.821086	1.99553	0.44853	0.575658	0.701867	1.78661
#N/A	GB40048	0	0.436348	0	0	0.340125	0.252154	0	0.332928	0	0.829701	0	0.32374	1.45425	0.591026	0
#N/A	GB40049	12.7856	0	0	0	0	0	13.0518	0	4.06012	6.46293	4.9085	0	9.91183	0	2.63677
#N/A	GB40050	12.9054	1.1436	2.74597	1.75668	3.11994	14.8692	7.52811	13.0882	12.88	14.6779	4.95452	11.4543	5.717	6.58317	12.4203
#N/A	GB40051	0	0	0.262301	0.0839013	0	0	2.69664	0.390693	0.559241	0.778928	0	0.759823	1.36525	0.369906	0
#N/A	GB40052	0	0	0	0	0	0	0	0	0	0	0	0	0	0	0
PREDICTED: Apis mellifera gastrin-releasing peptide receptor-like (LOC413550), mRNA	GB40053	17.8821	2.09285	1.29222	2.48002	2.38875	5.57191	4.4283	2.82295	5.20405	8.10111	7.12415	2.66186	9.71517	3.18908	5.56651
PREDICTED: Apis mellifera gastrin-releasing peptide receptor-like (LOC413550), mRNA	GB40054	31.2193	80.2741	66.008	84.2486	75.8142	20.4877	167.304	196.924	306.628	251.557	10.1818	81.1915	15.4411	84.4237	32.4001
PREDICTED: Apis mellifera immediate early response 3-interacting protein 1-like (LOC724829), transcript variant X1, mRNA	GB40056	6.71503	20.0827	22.5035	25.8218	16.8136	39.9736	12.2408	12.9818	34.2706	18.0325	3.22245	7.44997	9.29594	36.017	12.6944
PREDICTED: Apis mellifera heterogeneous nuclear ribonucleoprotein 27C-like (LOC409961), transcript variant X1, mRNA	GB40057	24.3298	28.3493	29.111	26.236	27.9359	37.2546	26.2649	19.9478	30.2448	24.3572	15.7696	9.8934	21.3458	19.1993	39.532
#N/A	GB40058	3.75431	54.8926	47.5302	49.0594	73.9061	23.0698	43.7999	65.2032	51.0943	40.3272	14.4132	49.9825	0	77.7307	46.455
PREDICTED: Apis mellifera ankyrin repeat and death domain-containing protein 1A-like (LOC100576924), transcript variant X1, mRNA	GB40059	17.3519	0.384402	0.184603	0.944771	0.898903	0.666407	5.06091	0.21997	2.3615	2.19278	3.33077	0.855599	13.4518	0.520666	0
PREDICTED: Apis mellifera neuroendocrine convertase 1-like (LOC410438), mRNA	GB40060	87.1414	1.67867	0.403078	0	0.654247	0	11.0504	5.28332	8.59384	28.7274	21.8181	0.934094	33.5677	0.568433	0
PREDICTED: Apis mellifera lachesin-like (LOC410439), transcript variant X2, mRNA	GB40061	80.8769	130.474	97.8484	147.253	112.906	28.4897	112.805	179.792	84.5104	87.0917	55.6386	442.898	62.3961	216.2	145.989
PREDICTED: Apis mellifera uncharacterized LOC410442 (LOC410442), transcript variant X4, mRNA	GB40063	3.75825	3.61852	3.75228	3.22684	3.02025	1.1658	2.95117	5.18582	5.11479	4.11003	4.16201	4.11613	3.20168	2.6241	2.48418
PREDICTED: Apis mellifera protein tyrosine phosphatase domain-containing protein 1-like (LOC102655054), transcript variant X2, mRNA	GB40064	12.3481	2.25788	0.980051	0.827067	1.11691	1.95716	10.8616	1.71445	6.66869	5.20148	14.2969	0.918135	23.0091	0.793972	4.17686
PREDICTED: Apis mellifera uncharacterized LOC102655027 (LOC102655027), ncRNA	GB40065	1.43893	0.318772	0.153085	0.391734	0	0	0	1.2769	0.652772	0.909202	0	0	0	0.215886	3.95668
#N/A	GB40066	380.019	30.3438	27.1721	19.065	41.0805	60.1196	63.0784	52.4835	86.4313	132.097	118.612	25.0097	198.456	30.9024	79.9995
PREDICTED: Apis mellifera receptor interacting protein kinase 5 (Ripk5), transcript variant X4, misc_RNA	GB40067	7.5503	2.21028	1.6639	0.972685	1.58318	0.258905	1.57296	1.00843	0.917462	2.30017	0.517612	1.03046	1.64249	0.70799	0.463421
PREDICTED: Apis mellifera hemicentin-2-like (LOC725619), mRNA	GB40069	140.394	19.2354	11.3975	6.64453	14.6206	32.6832	49.7674	16.3192	48.0122	72.059	276.126	15.6559	215.763	17.0453	126.207
PREDICTED: Apis mellifera transmembrane protein 45B-like (LOC725753), mRNA	GB40070	1.35698	2.10432	1.92488	1.97026	1.64028	3.47437	1.31927	1.03215	0.615594	1.14322	0	1.44974	2.00377	2.0359	5.28605
PREDICTED: Apis mellifera MPN domain-containing protein CG4751 ortholog (LOC410446), mRNA	GB40071	2.46237	1.44167	1.7402	1.79559	1.1845	0.878136	4.10391	1.18173	2.55326	2.55607	3.71378	2.08142	6.0384	2.34854	3.74815
PREDICTED: Apis mellifera cysteine desulfurase-like protein (LOC410039), transcript variant X3, mRNA	GB40072	4.53818	5.52947	4.36251	6.19941	4.03024	10.3952	6.85448	4.0066	4.7057	5.63256	4.04451	3.4365	7.3594	6.83302	5.90513
PREDICTED: Apis mellifera COP9 signalosome complex subunit 8-like (LOC408424), mRNA	GB40073	16.1571	40.0885	33.897	48.6923	31.4156	46.4149	175.302	32.0754	51.6007	11.2299	1301.36	25.2549	977.706	44.6029	251.46
PREDICTED: Apis mellifera hormone receptor-like in 38 (Hr38), transcript variant X1, mRNA	GB40074	16.6771	5.95169	3.74263	4.58846	4.37664	9.28619	6.28343	7.80121	12.9696	13.6444	7.7842	3.3493	9.88037	4.09918	8.99032
PREDICTED: Apis mellifera karyopherin (importin) beta 1 (KPNB1), transcript variant X1, mRNA	GB40075	4.21819	1.20577	0.448764	0.444525	0.44644	0.940655	5.55616	0.396744	6.85185	1.37564	19.3283	0.536758	16.1244	0.612447	4.67697
PREDICTED: Apis mellifera organic cation transporter 1-like (LOC410448), transcript variant X2, mRNA	GB40076	5.91953	3.89555	3.24144	3.31785	2.31496	3.27641	1.52339	2.47198	2.68539	3.41027	0.668401	1.30919	3.85632	1.43666	4.78738
PREDICTED: Apis mellifera probable 4-coumarate--CoA ligase 3-like (LOC726040), transcript variant X1, mRNA	GB40077	36.0797	12.2557	10.354	10.3512	9.32947	10.73	20.2368	6.63794	21.068	27.7074	21.3098	6.61441	20.491	7.24523	12.592
#N/A	GB40078	0	0	0.501165	0.213741	0	1.80918	0	0.597182	0	1.98434	0	0.193567	0	0.235586	0
PREDICTED: Apis mellifera uncharacterized LOC100578957 (LOC100578957), mRNA	GB40079	1.98545	2.19922	1.68983	0.270259	3.42851	2.28757	5.79085	2.26527	5.4042	0	0	1.22375	0	1.4894	1.36486
PREDICTED: Apis mellifera uncharacterized LOC100578957 (LOC100578957), mRNA	GB40080	8.73264	4.74849	5.84455	4.5386	3.39977	3.90262	23.6176	9.13811	11.7406	8.92878	12.4958	4.63869	11.0779	3.43027	5.67565
#N/A	GB40081	29.4005	1.66617	0.800149	1.30297	2.24329	9.45327	4.9855	2.2536	8.99507	34.9937	7.87474	1.93856	19.6877	1.6413	3.76016
#N/A	GB40082	29.8863	2.70852	1.44525	0.554742	3.98789	7.30417	7.92432	3.27206	9.24403	17.1672	0	3.18176	1.50447	1.42669	3.73542
PREDICTED: Apis mellifera palmitoyl-protein thioesterase 2 (Ppt2), transcript variant 2, mRNA	GB40083	19.161	8.7657	5.46914	5.93734	4.70757	4.90592	6.81534	4.04841	8.55105	6.29959	18.8388	5.87623	20.8754	6.54417	8.24582
PREDICTED: Apis mellifera DNA ligase 1-like (LOC102656433), mRNA	GB40084	12.6513	1.60153	0.672972	1.59908	0.624183	0.867642	9.88373	2.34843	4.91936	5.13888	36.4271	1.44815	28.0221	0.610102	21.1211
PREDICTED: Apis mellifera carboxypeptidase B-like (LOC410452), mRNA	GB40085	8.60363	0.980225	2.74597	1.23804	4.49951	3.58749	5.01874	3.92647	1.56121	3.88305	0.471859	1.03028	4.90029	0.811371	3.54865
PREDICTED: Apis mellifera putative sodium-dependent multivitamin transporter-like (LOC410454), mRNA	GB40086	2.35851	1.88096	1.12912	1.02732	1.0589	1.63043	1.71973	0.717573	1.06994	2.98048	2.26363	0.668696	5.74639	0.672316	1.94558
PREDICTED: Apis mellifera Ca2+-channel-protein-beta-subunit (Ca-beta), transcript variant X2, mRNA	GB40087	165.733	33.4652	25.0316	25.0374	23.3644	36.1035	32.0935	21.6645	65.4477	103.69	65.7126	24.9182	121.862	16.8757	55.8445
#N/A	GB40088	0	0.577209	0.138598	0	0	0	0	0.825756	0	1.64632	0	0.160594	8.65666	0.195455	0
PREDICTED: Apis mellifera Ca2+-channel-protein-beta-subunit (Ca-beta), transcript variant X4, mRNA	GB40089	28.0033	41.1401	28.7415	43.1936	36.1655	56.3212	25.7922	22.8881	34.9685	35.9469	17.5406	16.933	26.4427	19.2379	72.2394
#N/A	GB40090	5.06717	3.08701	2.96497	5.34549	1.09376	0.486518	5.54216	3.21184	5.17212	4.00216	4.86333	1.87392	4.20884	2.28071	0
PREDICTED: Apis mellifera uncharacterized LOC408431 (LOC408431), mRNA	GB40091	12.1778	14.3639	9.74301	13.3283	10.0455	24.3643	18.359	18.1394	20.1941	10.6581	4.73833	9.93008	68.7999	24.7022	47.0608
PREDICTED: Apis mellifera uncharacterized LOC100578090 (LOC100578090), mRNA	GB40092	7.01939	3.59138	2.13365	1.41047	0.952378	3.14514	7.79925	2.86024	6.36869	5.38567	2.8873	0.782885	9.25455	0.702088	4.71047
PREDICTED: Apis mellifera FMRFamide-related neuropeptides-like (LOC100578023), transcript variant X1, mRNA	GB40093	68.8291	0.338843	0.325448	0.624598	0.924427	0.881139	2.23055	0.484749	6.24486	23.1948	4.40402	2.82823	19.4802	0.344218	2.1029
PREDICTED: Apis mellifera ecdysis triggering hormone (Eth), transcript variant X1, mRNA	GB40094	1.77242	14.7244	41.2956	15.682	60.7537	83.0464	12.9238	20.5592	9.64871	17.3587	3.40225	6.99168	2.94438	4.38767	1.82763
PREDICTED: Apis mellifera distal-less (Dll), transcript variant X3, mRNA	GB40095	90.9756	54.3556	10.575	7.47439	15.4928	21.259	36.4281	18.8126	39.1924	51.88	40.1469	9.99396	44.6065	7.59522	20.5248
#N/A	GB40096	0	0	2.31239	2.1133	1.60856	1.19252	4.52818	2.36179	7.04307	3.92392	0	4.21045	0	0.465859	2.13453
#N/A	GB40097	0	0	0.263087	0	0	0	0	0.31349	0	1.56252	0	0	0	0	0
PREDICTED: Apis mellifera cyclin H (CycH), mRNA	GB40098	6.64556	6.73013	5.01639	5.21217	7.92366	0.364609	9.69136	5.73676	8.32648	6.59851	1.2149	2.65269	2.80374	4.27305	5.65608
PREDICTED: Apis mellifera partitioning defective 3 homolog (LOC102654373), mRNA	GB40100	10.9391	20.2569	15.358	25.1734	13.6426	76.0169	10.3624	15.1476	24.7702	12.347	7.71725	8.84006	7.55882	25.3757	21.9812
PREDICTED: Apis mellifera uncharacterized LOC102653949 (LOC102653949), transcript variant X1, ncRNA	GB40101	0	23.4584	14.0819	23.4224	16.4568	21.3507	7.72114	7.7187	6.00467	0	0	3.26334	2.9318	30.9796	23.6577
PREDICTED: Apis mellifera GPI-anchored wall transfer protein 1-like (LOC726815), mRNA	GB40102	4.9946	2.15471	2.54496	2.6121	3.31371	0.403832	10.3505	7.13146	3.93533	2.49148	6.05518	3.40252	5.82253	4.49609	3.07203
PREDICTED: Apis mellifera uncharacterized LOC100578511 (LOC100578511), mRNA	GB40103	2.69698	0.0746838	0.394522	0.229444	0.0582146	0.258947	4.42468	0.854741	1.22348	2.55616	1.29424	1.16361	3.73355	0.657527	0.463497
#N/A	GB40104	53.4437	1.07633	2.06755	1.32268	0	9.3297	7.08528	1.23183	13.2244	27.629	55.9569	1.19784	48.4264	3.64466	10.0197
#N/A	GB40105	0	0.973273	0.934797	0	0.758648	0	0	0	1.99304	0	0	0	0	1.31828	0
PREDICTED: Apis mellifera uncharacterized glycosyltransferase AER61-like (LOC408434), transcript variant X1, mRNA	GB40106	4.20393	2.62958	3.18335	2.18796	3.03187	2.94416	7.57319	2.60197	5.72134	3.28129	2.84811	1.43274	4.10802	0.964635	2.88992
PREDICTED: Apis mellifera ATPase WRNIP1-like (LOC410463), transcript variant X2, mRNA	GB40107	1.22254	1.40834	1.58678	1.23145	1.47777	1.50247	1.06971	3.96754	2.55118	2.31742	0	1.86874	1.35394	2.78798	1.34466
PREDICTED: Apis mellifera protein slowmo-like (LOC552354), transcript variant 1, mRNA	GB40108	21.2496	31.0232	22.2549	36.7963	23.6406	36.7915	18.7965	26.0109	44.6437	19.3697	8.69288	15.3948	9.25908	32.2209	24.5457
PREDICTED: Apis mellifera midway (mdy), transcript variant X3, mRNA	GB40109	1134.81	34.4939	29.2712	21.7797	32.9654	50.1509	347.948	62.4693	198.194	383.941	2474.36	44.6813	1688.69	24.3685	622.918
PREDICTED: Apis mellifera uncharacterized LOC100577222 (LOC100577222), transcript variant X6, mRNA	GB40110	375.075	52.9818	32.9516	39.3141	31.143	69.2642	66.7047	32.3064	100.787	273.327	85.293	23.3598	101.314	32.5482	72.7697
#N/A	GB40111	5.87565	2.41736	2.41109	2.51363	3.62362	7.73683	7.34449	4.25633	9.90038	18.0325	6.44491	3.41457	6.50716	3.90394	4.61613
PREDICTED: Apis mellifera uncharacterized LOC410462 (LOC410462), mRNA	GB40112	5.64815	9.43463	7.02652	11.3079	6.27201	35.0872	5.47116	7.08701	11.6892	6.61665	3.5612	4.13181	3.8353	11.4739	10.5429
PREDICTED: Apis mellifera UBX domain-containing protein 4-like (LOC408433), transcript variant 1, mRNA	GB40113	4.24347	10.6416	8.74014	11.1134	6.62422	8.01825	8.1686	14.2233	12.1663	7.72205	2.93239	7.21879	4.88753	12.9623	7.81782
PREDICTED: Apis mellifera homeobox protein ceh-19-like (LOC102654608), mRNA	GB40114	9.28486	0.804877	1.46022	1.59355	1.88216	3.10078	7.65321	5.16876	6.04341	6.37686	10.0737	2.43842	14.7536	1.75642	3.0526
PREDICTED: Apis mellifera uncharacterized LOC102654690 (LOC102654690), transcript variant X2, ncRNA	GB40115	2278.55	98.7702	80.8762	65.1633	127.37	231.989	497.379	158.361	582.543	1267.06	638.911	121.065	1570.04	96.4838	833.314
#N/A	GB40116	81.2565	0.635331	1.22043	0.910873	0.660305	0.734282	8.36456	1.09069	9.54075	11.4766	34.8652	1.29627	43.4069	0.573697	12.486
#N/A	GB40117	0	0	0.865723	0	0	1.56261	0	0	0	1.28542	0	0.250779	0	0	0
PREDICTED: Apis mellifera glutamate decarboxylase-like (LOC408432), transcript variant X1, mRNA	GB40118	41.5956	6.3956	6.49091	7.38432	5.93961	5.19467	10.3927	6.10277	7.62051	8.40856	13.5401	4.518	23.3552	2.60755	15.1469
PREDICTED: Apis mellifera fumarylacetoacetase (Faa), mRNA	GB40119	16.1707	4.34015	3.30839	3.09007	7.03463	5.37441	5.89551	1.34036	1.97503	4.7158	2.38772	1.76338	6.19916	0.746497	2.77906
PREDICTED: Apis mellifera fas apoptotic inhibitory molecule 1-like (LOC726648), mRNA	GB40120	34.8796	0.61816	1.78117	1.32938	2.28876	0.803741	4.06925	2.29928	14.2408	12.3418	22.764	1.97785	17.7691	1.67457	15.3455
PREDICTED: Apis mellifera uncharacterized LOC102654986 (LOC102654986), mRNA	GB40121	0	0.843204	0.202468	0.25905	0.328631	0.730898	0	0	0	1.20249	0	0.2346	0	0	0
PREDICTED: Apis mellifera uncharacterized LOC726613 (LOC726613), mRNA	GB40122	8.90934	0.232202	0.334534	0.0713374	0.0904987	0.201275	0.764275	0.86369	0.950993	1.98686	0	0.0646042	0.580406	0	0
PREDICTED: Apis mellifera angiotensin-converting enzyme-like (LOC726599), mRNA	GB40123	4.85139	0.44781	0.236559	0.275154	0.314154	0.0776334	0.589573	0.281881	0.275104	1.91587	0.388019	0.124592	4.47734	0.303276	1.11167
PREDICTED: Apis mellifera angiotensin-converting enzyme-like (LOC726599), mRNA	GB40124	5.46336	26.1305	18.0332	25.8759	18.3604	50.4114	29.2135	31.2555	34.6984	8.76294	7.26036	20.2389	3.41314	51.0092	30.3344
PREDICTED: Apis mellifera uncharacterized LOC100578263 (LOC100578263), transcript variant X1, mRNA	GB40125	26.1152	2.05921	2.35453	3.55479	2.21659	13.0896	3.22748	3.53508	10.8432	16.5011	5.0979	1.9643	9.80407	4.38297	5.17273
PREDICTED: Apis mellifera uncharacterized LOC410456 (LOC410456), transcript variant X5, mRNA	GB40126	138.268	15.1534	6.45995	4.18243	10.1064	20.7914	22.9377	7.79034	40.4892	88.0589	35.1073	6.8088	55.0939	8.78076	24.894
#N/A	GB40127	0	0	0	0	0	0	0	0.307958	1.10203	0	0	0	0	0	0
PREDICTED: Apis mellifera uncharacterized LOC726547 (LOC726547), transcript variant X14, misc_RNA	GB40128	76.4767	13.1093	8.58969	5.97294	9.65561	13.4819	30.7158	14.2405	52.3248	92.3671	23.1031	12.8893	36.1001	8.27628	26.8896
PREDICTED: Apis mellifera uncharacterized LOC726547 (LOC726547), transcript variant X14, misc_RNA	GB40129	7.75019	1.71693	2.14377	2.17019	2.21778	5.78291	2.90629	2.6387	7.23265	7.5554	1.27516	1.31024	4.16897	2.52488	1.82665
PREDICTED: Apis mellifera uncharacterized LOC726547 (LOC726547), transcript variant X10, mRNA	GB40130	0.840233	0.651489	0.178781	0.343116	0.362731	0	0	0.0532583	0.190586	0.265454	0	0.0517886	1.39581	0.441215	0.288801
#N/A	GB40131	0	0.224785	0.10795	0.138118	0	2.72785	0	0.385894	0.460309	0	1.94772	0.125081	1.12373	0.608936	0
PREDICTED: Apis mellifera blistery (by), transcript variant X14, mRNA	GB40132	853.996	220.042	125.221	112.559	124.923	238.836	1844.83	151.051	1474.63	526.16	1006.22	94.186	1546.67	133.35	1957.32
PREDICTED: Apis mellifera blistery (by), transcript variant X12, mRNA	GB40133	0	2.44619	1.64464	1.20244	2.28812	1.69631	0	1.39981	2.0037	11.1633	4.23916	2.72236	4.89155	0.993998	0
PREDICTED: Apis mellifera blistery (by), transcript variant X11, mRNA	GB40134	67.4873	168.314	183.461	202.441	260.87	131.823	114.732	114.58	307.46	380.181	51.4769	75.9111	54.0148	105.26	181.691
PREDICTED: Apis mellifera carboxypeptidase B-like (LOC726391), mRNA	GB40135	12.7411	0.716847	0.559413	0.495519	0.768308	0.310685	3.53917	2.07668	2.93588	4.34476	1.55284	0.698055	6.04737	1.30472	2.0854
PREDICTED: Apis mellifera serine protease 17 (SP17), mRNA	GB40136	4.66199	6.88524	0.950626	0.740352	0.536692	1.49205	2.83278	0.591002	1.05745	1.96381	2.23723	0.766256	6.02356	0.874307	1.6024
PREDICTED: Apis mellifera serine protease 17 (SP17), mRNA	GB40137	21.7571	49.9272	42.8436	16.8753	57.9152	64.7978	46.0966	61.9284	16.2019	33.4606	0.787995	1.97358	49.5549	0.554307	2.53979
PREDICTED: Apis mellifera serine protease 32 (SP32), mRNA	GB40138	0.529454	0.117292	0.0563275	0.576552	0.365707	0.20334	0.772114	0.939668	0.960747	1.00362	0	0.195801	0.586359	0.873784	0
PREDICTED: Apis mellifera peptidyl-prolyl cis-trans isomerase B-like (LOC408428), transcript variant X2, mRNA	GB40139	10.6437	4.00848	7.44525	6.04879	8.54652	17.2708	3.49242	8.36567	5.19063	5.21209	4.0862	2.95215	7.66196	1.75658	4.573
PREDICTED: Apis mellifera protein PIEZO2-like (LOC408427), transcript variant X9, mRNA	GB40140	54.9199	9.04792	8.6992	7.06259	7.63495	16.4627	19.9766	14.8381	19.8092	17.6837	18.7703	7.39358	23.7129	12.7106	16.3996
Apis mellifera venom serine carboxypeptidase (LOC410451), mRNA	GB40141	2.44364	10.3457	6.21047	6.39382	4.12593	4.27535	6.33529	5.54163	9.11478	4.63209	0.521186	8.40102	3.00697	7.16951	10.4523
PREDICTED: Apis mellifera zinc finger protein 62-like (LOC100577543), mRNA	GB40142	71.6913	4.83103	3.21903	2.78286	5.74269	13.7144	22.2613	5.97825	22.7535	45.4709	23.5462	5.20842	37.736	6.33906	14.0541
PREDICTED: Apis mellifera uncharacterized LOC100578992 (LOC100578992), ncRNA	GB40143	0	1.91932	0.409655	0.524139	0.332461	1.10913	0	0.976278	2.18352	3.04127	0	1.424	1.06611	1.5887	0.661753
PREDICTED: Apis mellifera uncharacterized LOC102654051 (LOC102654051), transcript variant X3, ncRNA	GB40144	2.15652	16.0044	14.6834	8.5128	24.3916	24.0185	58.1807	52.4896	31.3058	21.8019	12.4186	32.8311	7.16491	40.7669	22.237
PREDICTED: Apis mellifera uncharacterized LOC410449 (LOC410449), transcript variant X2, mRNA	GB40145	14.3991	21.9748	19.5742	29.4544	18.0959	125.194	10.4992	17.0115	13.3365	9.73	8.06159	10.5268	10.8526	5.82087	37.8064
PREDICTED: Apis mellifera RabX6 protein (RabX6), mRNA	GB40146	8.36128	2.73819	4.09961	3.61233	2.95045	11.1694	10.603	5.06938	4.45276	4.59403	9.07166	2.3303	11.273	4.47241	4.9981
PREDICTED: Apis mellifera fez family zinc finger protein 2-like (LOC100577696), mRNA	GB40147	4.13319	0.305213	0.256504	0.140652	0.178431	0.529124	0.502292	0.654957	1.40626	1.08816	3.30577	0.169835	4.57742	0.413406	1.18387
PREDICTED: Apis mellifera uncharacterized LOC100576555 (LOC100576555), mRNA	GB40148	14.9099	2.71814	2.29674	1.50101	3.29879	4.35433	33.9742	3.48494	18.953	11.4818	26.8316	3.0633	19.4365	2.84281	5.65862
PREDICTED: Apis mellifera COMM domain-containing protein 7-like (LOC102654920), mRNA	GB40149	0	0.323278	0.853869	0.993178	0.629973	0.280221	1.06404	0.462482	0.992998	1.38308	0	1.52904	1.61611	1.31362	1.00315
PREDICTED: Apis mellifera FoxP protein (Foxp), transcript variant X14, mRNA	GB40150	144.907	43.1067	31.24	31.7452	41.6451	60.1579	65.5723	45.3958	109.183	153.128	66.5236	23.3816	90.6239	23.8543	57.3318
PREDICTED: Apis mellifera secretory carrier membrane protein (Scamp), transcript variant X2, mRNA	GB40151	5.74373	6.70146	5.86621	6.51528	4.62856	5.00006	4.4673	8.81043	7.46951	6.41162	11.7604	7.03321	12.7221	5.28535	6.84394
PREDICTED: Apis mellifera uncharacterized LOC725354 (LOC725354), transcript variant X1, mRNA	GB40153	33.4392	53.7073	17.0761	21.3931	30.6039	28.8956	63.3946	24.5868	166.108	157.41	25.6753	11.9541	12.9616	24.8339	48.2731
PREDICTED: Apis mellifera uncharacterized LOC725354 (LOC725354), transcript variant X1, mRNA	GB40154	233.471	225.34	40.4406	16.7683	36.4668	53.1687	66.7264	81.3552	291.663	337.296	87.8302	28.4912	103.945	117.758	178.239
PREDICTED: Apis mellifera uncharacterized LOC725354 (LOC725354), transcript variant X1, mRNA	GB40155	16.6599	7.83098	4.77568	5.33986	4.49356	3.80072	6.9045	8.20877	16.0038	17.0947	5.80825	3.63786	10.4868	2.78258	7.684
#N/A	GB40156	1.05351	0	0.11208	0	0	0.809209	0	0.133553	0	0	0	0	0	0.316119	0
PREDICTED: Apis mellifera uncharacterized LOC408421 (LOC408421), transcript variant X2, mRNA	GB40157	29.3058	82.0827	22.8694	22.6408	24.1813	8.33482	30.0316	38.0347	82.7857	75.4697	6.38557	17.3795	39.1221	14.2124	15.681
PREDICTED: Apis mellifera neuroendocrine convertase 1-like (LOC410438), mRNA	GB40158	43.7523	8.99088	4.14923	2.37144	6.87148	10.9488	12.4145	7.83035	23.8897	32.5238	18.241	4.31963	22.8022	4.63358	11.4319
PREDICTED: Apis mellifera ankyrin repeat and death domain-containing protein 1A-like (LOC100576924), transcript variant X1, mRNA	GB40159	13.7084	4.24829	4.63024	4.24179	3.9065	5.66754	6.22677	8.3852	8.29174	8.37775	5.32029	3.71215	7.05162	3.87737	6.74584
PREDICTED: Apis mellifera heterogeneous nuclear ribonucleoprotein 27C-like (LOC409961), transcript variant X2, mRNA	GB40160	33.4392	148.158	117.576	133.138	152.154	150.257	112.16	117.635	345.11	517.656	35.3035	60.389	7.40664	32.3593	63.2148
PREDICTED: Apis mellifera chondroitin syntase (LOC413549), transcript variant X2, mRNA	GB40161	367.773	783.79	647.884	909.35	784.974	524.738	945.32	1086.26	1664.21	1270.3	207.055	560.116	236.644	720.083	801.535
PREDICTED: Apis mellifera chondroitin syntase (LOC413549), transcript variant X2, mRNA	GB40162	12.937	4.65254	6.18457	4.61969	4.1488	4.00061	2.69517	3.10965	4.03959	6.05111	3.22507	4.12153	5.39603	2.0922	3.69591
PREDICTED: Apis mellifera lysozyme 2 (Lys-2), mRNA	GB40163	86.4365	277.364	13.0042	19.0153	23.6705	17.1012	0	1.88161	24.1609	12.6885	0	1.39917	99.5943	0.130992	4.20136
PREDICTED: Apis mellifera lysozyme 2 (Lys-2), mRNA	GB40164	1.09834	1.21659	0.311599	0.249175	0.0632207	1.40607	4.80517	2.08855	1.16261	1.61931	0	0.270788	0.810922	0.164785	0.251677
PREDICTED: Apis mellifera uncharacterized LOC409962 (LOC409962), mRNA	GB40165	13.1965	3.26742	2.56015	1.16232	4.82569	4.17381	3.39614	2.26338	2.81723	8.33834	5.96033	1.33969	3.4388	1.86344	1.06726
PREDICTED: Apis mellifera 6-phosphofructo-2-kinase (Pfrx), transcript variant X1, mRNA	GB40166	7.09578	7.85976	6.3412	4.24985	5.14629	6.54041	4.13917	11.3341	14.8074	8.96704	5.44827	5.77309	6.28674	8.30382	1.95115
PREDICTED: Apis mellifera 6-phosphofructo-2-kinase (Pfrx), transcript variant X2, mRNA	GB40167	1.92979	1.71005	1.64245	1.57609	0.333238	2.96458	0	8.07311	6.12813	7.3161	7.40863	2.141	0	6.65917	5.30639
PREDICTED: Apis mellifera 6-phosphofructo-2-kinase (Pfrx), transcript variant X2, mRNA	GB40168	14.4903	75.694	52.2292	88.7193	51.7457	57.7656	5.91683	10.5441	20.6409	19.5935	10.5696	18.3984	11.2334	71.8727	85.2672
PREDICTED: Apis mellifera gastrin-releasing peptide receptor-like (LOC411632), transcript variant X2, mRNA	GB40169	6.48496	1.63254	1.28576	0.88273	1.32344	2.717	2.14935	2.05525	2.67446	2.98005	1.13165	0.581392	2.28517	0.928725	2.83689
PREDICTED: Apis mellifera myosin-4-like (LOC102655978), mRNA	GB40170	11.4186	0.140534	0.202468	0.43175	0.219087	0.974531	2.77534	0.643354	2.87781	2.00416	7.30621	1.2512	8.4306	1.14211	3.48869
#N/A	GB40171	0.422696	0.374566	0.179879	0.230149	0.0729917	0	0	0.107171	0.383512	1.33542	0.811385	0	0	0.253671	0
#N/A	GB40172	3.24325	0.239496	0.172521	0.147157	0.280025	0	7.09455	0.274099	5.88521	3.757	13.4887	0.333169	13.1701	0.162197	0
PREDICTED: Apis mellifera major facilitator superfamily domain-containing protein 3-like (LOC102654962), mRNA	GB40173	0	0	0	0.106064	0	0	0	0.197558	0.706965	0	0	0.0960531	4.31472	0	0
#N/A	GB40174	3.51468	0	0	0.478416	0.606919	0	0	0.445557	1.59443	1.11039	3.37329	0.433261	9.73107	0	3.62415
PREDICTED: Apis mellifera S phase cyclin A-associated protein in the endoplasmic reticulum-like (LOC100577405), ncRNA	GB40175	0	1.22528	0	0	0.636723	0	0	0.233718	0	1.16492	0	0	2.04179	0	2.53475
#N/A	GB40176	0	0.450678	0.216431	0.553831	0.702591	8.59436	0	1.80527	0.922885	0	0	0	0	4.27305	1.39848
#N/A	GB40177	0	0	0	0	0	0	0	0	0	0	0	0.407265	0	0	0
PREDICTED: Apis mellifera leucine-responsive regulatory protein-like (LOC100577391), partial mRNA	GB40178	28.2742	0	0.0911524	0	0	0	0	0.108616	1.55474	4.87234	0	0	7.59104	0	1.17797
#N/A	GB40179	0	0	0	0.41032	0	2.3154	8.79195	4.96779	0	7.61872	0	1.48637	0	2.71354	2.0722
PREDICTED: Apis mellifera probable malate dehydrogenase, mitochondrial-like (LOC724677), mRNA	GB40180	12.175	0.107886	0.362675	0.33145	0.252286	0.187034	2.8408	0.185211	1.32556	1.84628	3.73926	0.240133	9.70812	0.511456	3.013
#N/A	GB40181	0	0	0	0	0	3.80652	0	0	0	2.08753	0	0	0	0	0
#N/A	GB40182	0	0	0	0.472385	0	0	0	0.43994	1.57433	2.19278	0	0.4278	7.68672	1.04133	4.77129
PREDICTED: Apis mellifera odorant receptor 78 (Or78), transcript variant X1, mRNA	GB40183	4.63041	0.192336	0.123155	0.157572	0.399792	0.666874	1.26611	1.02725	0.919005	1.28002	1.11103	1.24862	5.76908	0.781546	3.38203
PREDICTED: Apis mellifera odorant receptor Or2-like (LOC100576282), mRNA	GB40184	20.4443	0.301939	0.471255	0.231905	0.235356	0.654311	2.48452	1.07989	1.08203	4.30596	0.654062	1.1761	1.13208	0.613458	0.936937
PREDICTED: Apis mellifera putative odorant receptor 13a-like (LOC102653606), mRNA	GB40185	98.2879	0.914876	1.23019	0.449711	0.641816	2.53768	6.62473	0.994705	11.0534	27.6597	57.8688	1.98542	74.0923	0.743511	44.0032
PREDICTED: Apis mellifera putative odorant receptor 13a-like (LOC724590), mRNA	GB40186	0.647803	0.43053	0.275673	0.0881786	0	1.24396	0.472352	1.35502	0.440813	2.0466	0	0.838487	1.43486	0.97191	0.445321
PREDICTED: Apis mellifera putative odorant receptor 13a-like (LOC100576246), mRNA	GB40187	19.6654	1.7276	1.08215	0.830747	0.76114	0.260435	3.95566	2.493	4.15298	12.8542	11.0643	2.04803	18.775	1.11913	7.92473
PREDICTED: Apis mellifera odorant receptor Or2-like (LOC100576212), mRNA	GB40188	0	0	0.267899	0.171384	0.434835	0	0	0.159613	0	0.795552	0	0.620831	2.78878	0	0
PREDICTED: Apis mellifera odorant receptor Or2-like (LOC100576212), mRNA	GB40189	21.4881	8.33058	3.07191	3.839	1.73934	2.83684	1.95853	4.17121	5.17866	8.91018	0	1.57277	0	0.805974	0.923226
PREDICTED: Apis mellifera odorant receptor Or2-like (LOC100577062), mRNA	GB40190	24.878	5.78687	4.4553	0.846594	1.64678	65.7669	15.1167	14.7177	9.02871	4.19182	23.0813	13.596	16.5311	44.9764	23.6577
PREDICTED: Apis mellifera odorant receptor Or2-like (LOC100577062), mRNA	GB40191	7.80329	0.864345	0.223509	0.204265	0.207305	0.345796	3.06376	0.875085	1.76998	2.46529	4.03275	0.813938	2.65907	0.180114	1.2379
PREDICTED: Apis mellifera uncharacterized LOC100577024 (LOC100577024), mRNA	GB40192	5.98948	0.398061	0.541626	0.244585	0.517135	0.805101	5.67747	1.86026	4.61911	1.13535	9.77252	1.03367	19.2363	1.0334	4.32323
PREDICTED: Apis mellifera putative odorant receptor 13a-like (LOC102656838), mRNA	GB40193	8.23415	0.982229	1.04448	0.387979	0.710942	1.45955	4.61847	2.77021	4.02276	3.00162	9.72667	1.99104	15.4324	0.99781	2.39479
PREDICTED: Apis mellifera uncharacterized LOC100576980 (LOC100576980), mRNA	GB40194	14.8169	0.504992	0.282933	0.413717	0.459237	0.729554	1.10809	0.915092	0.517053	2.40056	2.18783	0.608837	3.36604	0.570002	3.91755
PREDICTED: Apis mellifera uncharacterized LOC100576940 (LOC100576940), mRNA	GB40195	5.53709	0.102221	0.294539	0.125618	0.557755	2.8354	2.01871	0.409464	0.41865	2.91554	2.65717	0.511926	8.17627	0.899967	1.90319
PREDICTED: Apis mellifera uncharacterized LOC724911 (LOC724911), misc_RNA	GB40196	22.6435	0.318495	0.420618	0.489242	0.310326	0.138037	1.0483	0.182256	2.77187	12.2635	0	0.443065	7.96101	0.701018	4.44739
PREDICTED: Apis mellifera uncharacterized LOC724911 (LOC724911), misc_RNA	GB40197	0.505477	0.78386	0.967978	0.963273	2.61859	1.94131	4.42288	4.54964	3.43964	5.74901	0	1.80702	1.11961	1.44091	1.38992
PREDICTED: Apis mellifera putative odorant receptor 13a-like (LOC724958), mRNA	GB40198	1.40308	0.41444	0.547327	0.445636	0.807621	0.538862	2.72819	1.42296	0.636509	0.295516	0	0.230614	1.03592	0.561352	0.321508
#N/A	GB40199	4.30182	0.238249	0.228831	0.292781	0.371422	2.4782	1.56836	2.31771	0.975759	2.0386	2.06438	1.72345	7.14625	1.61352	0
PREDICTED: Apis mellifera odorant receptor 94 (Or94), mRNA	GB40200	14.4416	0.430675	0.177278	0.0378035	0.19183	1.38659	2.83506	0.633727	4.03165	14.7404	2.13241	0.342355	8.30445	0.333338	2.10007
PREDICTED: Apis mellifera odorant receptor Or2-like (LOC100576839), mRNA	GB40201	1.02475	0.529705	0.327063	0.278977	0.11797	0.393561	1.49441	0.82275	1.08471	1.07916	1.31137	0.884261	2.26978	0.819973	0.704446
PREDICTED: Apis mellifera putative odorant receptor 67c-like (LOC100576111), mRNA	GB40202	21.7779	0.53606	0.829511	0.329378	0.696415	0.826067	1.96044	2.45404	2.68334	11.5521	1.03219	1.42516	3.57313	0.645409	1.10895
PREDICTED: Apis mellifera copper transporter superoxide dismutase (CT-SOD), partial mRNA	GB40203	3.44864	2.2374	2.07033	2.49802	1.87162	1.84479	4.66999	3.80976	1.56447	2.87946	1.89138	4.66114	4.2285	4.19468	2.70938
PREDICTED: Apis mellifera RNA polymerase II 140kD subunit (RpII140), mRNA	GB40204	0.362576	0.481937	0.578606	0.39483	0.250441	0.139249	0	0.781387	0.493448	0.68729	0.695982	0.178782	0	0.489581	0.498493
PREDICTED: Apis mellifera RNA polymerase II 140kD subunit (RpII140), mRNA	GB40205	5.05816	1.55431	1.85741	2.10996	1.35244	3.19591	2.61744	4.24036	3.55298	4.43321	3.75847	1.60911	6.86673	2.91314	4.37447
PREDICTED: Apis mellifera probable G-protein coupled receptor 125-like (LOC552108), mRNA	GB40206	31.9071	1.42835	1.26635	0.753869	1.08482	1.36509	3.01365	1.72903	14.6247	97.4089	2.06273	1.22277	15.2881	1.72385	14.9447
PREDICTED: Apis mellifera seryl-tRNA synthetase (Aats-ser), mRNA	GB40207	1.11314	1.54123	0.917789	1.28792	0.720818	0.534383	0.811656	2.96337	0.883706	0.879181	0.53418	1.88676	0	2.58859	1.33911
PREDICTED: Apis mellifera WD40 repeat-containing protein SMU1-like (LOC409955), transcript variant 1, mRNA	GB40208	6.86004	5.11642	4.81684	5.75834	2.68509	12.6462	4.66859	3.68152	3.42326	5.63494	2.63363	3.26985	6.33112	8.02794	6.44494
PREDICTED: Apis mellifera protein atonal-like (LOC102656170), transcript variant X1, mRNA	GB40209	0	0	0.162323	0.0692289	0.0878238	0	0	1.16053	0.922885	0.642712	0.97626	0	1.68975	0.0763045	0
#N/A	GB40210	0.466111	0.619555	0.446297	0.507574	0.965864	2.14815	0	2.00903	1.05726	1.76709	0	0.229834	0	1.1189	0
PREDICTED: Apis mellifera putative peptidyl-tRNA hydrolase PTRHD1-like (LOC725196), transcript variant X2, mRNA	GB40211	8.84648	5.04934	4.18538	5.09296	3.855	7.79435	5.1604	7.57323	4.93388	5.19515	3.69591	3.73985	3.91891	2.73258	7.22608
PREDICTED: Apis mellifera extracellular domains-containing protein CG31004-like (LOC725498), transcript variant X1, mRNA	GB40212	40.574	7.80397	3.07849	4.88072	2.66134	7.97253	14.6778	1.47529	6.56352	16.2964	21.1312	2.59775	33.7882	0.896592	18.5946
#N/A	GB40213	75.7751	0.839336	2.82154	3.09434	0.654247	16.006	88.4035	9.12574	27.5003	31.1214	50.9088	12.1432	62.9395	4.54747	7.81354
PREDICTED: Apis mellifera uncharacterized LOC102655518 (LOC102655518), ncRNA	GB40214	17.5734	0.973273	0.467398	0.59802	0	0	0	7.2403	1.99304	0	0	0.541576	4.86553	1.31828	3.02013
#N/A	GB40216	784.857	17.7513	15.7381	47.2644	26.2545	19.727	59.9252	34.6415	52.1958	140.207	39.439	29.1266	109.22	14.7962	35.3099
PREDICTED: Apis mellifera DNA replication licensing factor Mcm6-like (LOC413064), transcript variant X1, mRNA	GB40217	9.90721	0.404301	0.37445	0.159698	0.56276	0	0.570311	0.694073	1.1236	4.61259	0	0.899892	1.73242	0.430272	0.627286
PREDICTED: Apis mellifera urea transporter 2-like (LOC100576458), mRNA	GB40218	100.48	4.10614	3.07894	1.46068	2.30223	5.2452	34.1432	4.94673	36.289	68.8309	48.0628	3.84817	61.2214	4.14688	25.0361
PREDICTED: Apis mellifera uncharacterized LOC100576428 (LOC100576428), mRNA	GB40219	244.146	51.2585	15.3808	13.6842	34.7747	20.8368	49.7995	36.5742	65.0064	113.33	90.667	25.2967	120.879	27.9631	67.5724
PREDICTED: Apis mellifera tetraspanin-31-like (LOC551248), mRNA	GB40221	47.9888	0.499114	0.958766	0.79736	0.272335	0.865275	6.57118	2.68476	2.24856	4.12836	16.434	1.36088	22.9553	0.743646	4.80123
PREDICTED: Apis mellifera cell division control protein 2 cognate (cdc2c), transcript variant 2, mRNA	GB40222	5.38428	2.56452	2.46314	2.82169	2.18495	4.65269	9.4224	4.43669	7.08347	5.44336	4.13415	3.55096	9.24261	2.98891	13.5098
#N/A	GB40223	14.0255	1.03571	1.65794	3.18192	0.269105	22.1448	4.54527	5.33407	13.4323	6.89278	5.98282	2.68949	3.45177	1.87047	6.42774
#N/A	GB40224	29.9739	2.21341	0.708636	2.26669	1.15021	1.27907	29.1411	4.64421	10.576	0	0	4.1055	14.7536	1.49901	9.1578
PREDICTED: Apis mellifera uncharacterized LOC551115 (LOC551115), misc_RNA	GB40225	10.0254	1.89986	1.7605	1.49619	1.77292	3.15447	5.10828	2.1131	4.8768	5.1135	3.70973	1.4592	5.75212	2.12028	2.98921
PREDICTED: Apis mellifera uncharacterized LOC551115 (LOC551115), misc_RNA	GB40226	17.6709	78.7287	170.102	120.178	105.444	77.6687	211.885	336.104	94.712	30.6016	10.0504	94.0712	15.946	116.554	88.6318
PREDICTED: Apis mellifera facilitated trehalose transporter Tret1-like (LOC412797), mRNA	GB40227	22.2118	0.668236	0.262563	0.335939	0.426173	0.421261	3.1992	1.04289	5.97118	4.33169	3.15826	0.912696	6.37753	0.164566	1.88507
PREDICTED: Apis mellifera uncharacterized LOC100576488 (LOC100576488), transcript variant X1, mRNA	GB40228	3.72659	0.675462	0.396464	0.0922295	0.877518	1.95166	1.48215	1.28842	1.2295	2.35468	2.60123	0.668196	0.750386	0.25414	0.465778
PREDICTED: Apis mellifera collagen alpha-2(IX) chain-like (LOC100576526), mRNA	GB40229	6.50353	5.94309	3.54597	4.6476	5.05367	8.42979	11.8553	12.0577	7.00702	8.21861	3.12096	6.11299	9.90347	5.61048	6.14726
PREDICTED: Apis mellifera collagen alpha-2(IX) chain-like (LOC100576526), mRNA	GB40230	643.558	276.434	72.4107	40.6718	87.7008	180.246	315.721	279.811	675.386	1711.34	288.91	72.8434	382.639	248.504	229.866
PREDICTED: Apis mellifera collagen alpha chain CG42342-like (LOC551490), transcript variant X4, misc_RNA	GB40231	37.8983	26.3124	20.1804	24.8628	18.8234	37.9631	33.6165	32.7639	27.4726	30.4884	13.4995	17.3386	19.255	13.3356	34.3786
PREDICTED: Apis mellifera thioredoxin peroxidase 1 (Tpx-1), mRNA	GB40232	36.8981	167.885	137.015	199.646	130.128	327.02	86.9225	132.501	87.8787	68.5979	35.4138	81.4355	31.4337	157.24	131.215
PREDICTED: Apis mellifera uncharacterized LOC725246 (LOC725246), mRNA	GB40233	7.02935	1.55724	0.716678	0.318944	0.505766	1.46232	2.13563	1.11389	2.79026	3.88636	0	0.469366	5.1899	0.395485	3.02013
PREDICTED: Apis mellifera uncharacterized LOC725246 (LOC725246), mRNA	GB40234	14.2174	1.38518	0.989894	0.982831	1.47819	3.11607	3.14802	2.16093	5.97696	17.9667	6.00115	1.15617	8.40857	1.34014	3.32606
PREDICTED: Apis mellifera insulin-degrading enzyme-like (LOC413539), transcript variant X2, mRNA	GB40237	3.35557	9.06204	6.17935	6.971	5.21499	3.16044	5.35953	8.8217	7.32131	6.15879	3.22058	7.02215	5.57432	11.5552	5.4922
PREDICTED: Apis mellifera coproporphyrinogen-III oxidase-like (LOC552084), mRNA	GB40238	0.69117	0.918704	0.661789	0.893777	0.954818	0.132724	1.00795	1.57716	1.41097	1.0918	0	0.852019	0.382728	2.0221	0.712699
PREDICTED: Apis mellifera transmembrane protein 129-like (LOC412351), transcript variant X2, mRNA	GB40239	3.71534	2.08934	1.94593	2.33414	2.22082	4.50021	3.75103	3.36943	5.18604	3.61164	2.74299	1.69107	2.5321	1.54362	1.96465
PREDICTED: Apis mellifera myosin regulatory light chain 2 (Mlc2), mRNA	GB40240	594.174	2883.49	2398.28	6619.9	2484.47	3277.54	1609.93	3835.06	2687.74	558.585	264.056	1461.69	69.1321	4303.15	3539.21
#N/A	GB40241	4.61424	34.7551	31.9084	39.8836	14.3423	145.314	3.36452	42.1163	13.6061	86.0085	0	26.4495	17.8856	218.761	58.6816
#N/A	GB40242	6.60759	31.4717	29.8761	96.2381	34.8007	3.80652	24.0899	13.4023	43.4642	81.4136	0	31.3594	0	8.92213	9.08454
PREDICTED: Apis mellifera uncharacterized LOC409257 (LOC409257), transcript variant X2, mRNA	GB40243	26.0322	3.27565	2.71412	2.3954	3.3265	14.0769	20.8038	8.32947	28.3428	11.0535	31.7809	5.57089	157.527	6.62398	4.2233
#N/A	GB40244	0	0	0	0	0	0	0	0.534213	0	0	0	0	0	0	0
PREDICTED: Apis mellifera uncharacterized LOC102656406 (LOC102656406), mRNA	GB40245	1.29459	0.143398	0	0.264328	0.111776	0.497194	2.83189	0.164116	1.17458	0.408998	1.24251	0.47876	0.716865	0.0971148	0
PREDICTED: Apis mellifera uncharacterized LOC100578521 (LOC100578521), ncRNA	GB40246	16.0899	0.594076	1.99707	1.09508	0	0	0	2.03972	1.21653	1.69442	0	0	0	1.60933	0
PREDICTED: Apis mellifera ubiquitin carboxyl-terminal hydrolase 22-like (LOC411920), mRNA	GB40247	14.8552	0.329092	0.790206	1.21325	0.769564	3.42313	2.16636	2.07152	4.04343	4.69318	0	0.915614	3.29036	0.668625	2.04239
PREDICTED: Apis mellifera cytochrome P450 6AS12 (CYP6AS12), transcript variant X2, mRNA	GB40248	1.19703	0.265182	4.16007	0.217252	5.0987	0	1.16377	10.6729	2.17212	2.26905	0	1.03292	0.441894	1.43674	0.548583
PREDICTED: Apis mellifera uncharacterized LOC100577523 (LOC100577523), mRNA	GB40249	5.00238	0.615664	0.354795	0.453948	0.959797	1.92119	0.810563	1.40923	4.28651	3.86319	3.20077	0.959238	3.69335	1.16747	0.382089
#N/A	GB40250	0	0.979525	0.18816	0.722234	0.305409	2.37738	0	0.336314	1.20351	1.11752	0	0.218022	1.95872	0.398025	3.03953
PREDICTED: Apis mellifera schnurri (shn), transcript variant X1, mRNA	GB40251	9.80254	1.3666	0.925998	0.71317	0.773396	1.23327	2.09499	1.51049	15.1809	3.89783	4.86632	0.927118	8.61001	0.976235	2.43983
PREDICTED: Apis mellifera DNA-directed RNA polymerases I, II, and III subunit RPABC4-like (LOC727025), mRNA	GB40252	84.5269	828.739	666.997	1159.45	540.477	3018.13	834.695	1336.07	1734.32	441.006	97.352	557.013	93.6117	1330.13	876.578
PREDICTED: Apis mellifera muscle-specific protein 20-like (LOC724711), mRNA	GB40253	193.404	1489.01	3538.8	2100.97	3072.94	9165.88	1196.2	1151.62	1211.3	853.27	421.476	430.405	192.772	565.314	1683.02
PREDICTED: Apis mellifera probable palmitoyltransferase ZDHHC16-like (LOC412024), transcript variant X1, mRNA	GB40254	0.970562	0.215012	0.722793	0.264225	0.502794	0	0	0.123039	2.20148	0.306629	13.9728	0.957145	6.9867	0.509653	7.00556
#N/A	GB40255	249.705	0	0.408702	0	0.331688	0	2.80116	0.243502	15.6848	125.009	0	0	29.7816	0	0
#N/A	GB40256	0	0.714747	0	0	0	3.7173	0	1.22702	1.46364	2.0386	0	0	0	2.42028	4.43581
#N/A	GB40257	0	0.201072	0.869053	0.370641	0.94039	20.9149	0	2.87653	4.52924	5.16147	0	1.23075	0	0	1.87181
#N/A	GB40258	0	5.21132	4.17109	6.40411	1.80539	9.03446	0	6.9583	2.37146	6.6061	0	0	0	0.784294	3.59357
PREDICTED: Apis mellifera hcp beta-lactamase-like protein CG13865-like (LOC552586), transcript variant 2, mRNA	GB40259	34.9978	38.1275	25.0559	48.7037	24.4583	17.7106	24.6183	44.941	48.9378	10.1463	6.32282	27.4589	2.27996	66.3452	38.2108
PREDICTED: Apis mellifera gamma-interferon-inducible lysosomal thiol reductase-like (LOC552600), mRNA	GB40261	46.4219	25.2426	48.9383	20.3519	87.6577	52.7911	20.2215	23.9218	21.0593	26.6655	12.7299	13.8232	158.908	16.7335	21.9654
PREDICTED: Apis mellifera uncharacterized LOC413721 (LOC413721), transcript variant X7, mRNA	GB40262	13.8685	1.70686	0.98363	0.839013	1.33047	1.77543	6.74159	0.976733	13.282	15.5786	8.87377	0.569867	6.82627	1.61834	2.1186
PREDICTED: Apis mellifera uncharacterized LOC413721 (LOC413721), transcript variant X1, mRNA	GB40263	7.67814	12.7572	6.99194	11.8076	8.77601	27.733	6.79829	10.4752	16.5866	13.1683	4.56193	5.70153	5.06153	18.6097	15.3319
PREDICTED: Apis mellifera transcriptional activator protein Pur-alpha-like (LOC726399), transcript variant X1, mRNA	GB40264	16.6139	4.46922	2.52503	2.09994	5.73782	9.11523	10.3836	3.76099	9.15194	17.2461	4.55588	3.36462	18.3995	3.91696	6.52625
PREDICTED: Apis mellifera transcriptional activator protein Pur-alpha-like (LOC726399), transcript variant X4, mRNA	GB40265	25.1376	14.5187	14.2313	13.6869	14.5726	36.7205	18.3293	13.9987	49.4837	72.8933	13.7865	7.96823	22.3709	8.35103	28.6978
PREDICTED: Apis mellifera transcriptional activator protein Pur-alpha-like (LOC726399), transcript variant X4, mRNA	GB40266	1.65521	5.56137	9.56778	7.09714	7.86014	5.08553	12.0691	22.8366	5.63163	4.18342	1.05908	6.0192	5.1938	5.46334	10.9992
PREDICTED: Apis mellifera mitochondrial ribosomal protein L45 (mRpL45), mRNA	GB40267	8.9777	29.6909	27.6302	38.5379	24.7491	10.2207	65.9294	124.989	79.8546	102.513	1.84641	36.6396	7.10186	66.6735	31.9599
PREDICTED: Apis mellifera uncharacterized LOC102655859 (LOC102655859), mRNA	GB40268	9.5058	0.311978	0.374556	0.239616	0.729544	0.540852	4.10741	0.580211	4.47202	4.44912	10.1371	0.781199	4.28897	0.739496	0.968088
PREDICTED: Apis mellifera uncharacterized LOC413720 (LOC413720), transcript variant X2, mRNA	GB40269	6.25908	2.46814	1.58482	1.99364	1.29699	1.15384	2.73832	5.30036	4.42951	4.35033	2.16263	2.28385	1.9409	3.00499	1.54897
PREDICTED: Apis mellifera uncharacterized LOC100576298 (LOC100576298), mRNA	GB40270	2.53943	1.40642	1.41836	1.5987	0.712581	0.85337	3.7033	4.26549	0.864008	2.0057	1.21864	2.85649	0.70309	3.42895	1.74568
PREDICTED: Apis mellifera aladin-like (LOC100576146), mRNA	GB40271	2.61542	0.637343	0.528672	0.78322	0.496797	0.803572	0	0.663115	1.42378	2.80937	0.502041	0.386889	1.15861	0.510114	0.719169
PREDICTED: Apis mellifera uncharacterized LOC100576110 (LOC100576110), transcript variant X3, mRNA	GB40273	12.7922	2.17265	2.40432	2.87309	2.79803	4.83102	8.08387	2.59467	4.64254	4.17613	10.6406	2.68076	21.0145	1.43942	6.44876
PREDICTED: Apis mellifera kinesin 2C (kinesin-2C), transcript variant X5, mRNA	GB40274	33.7592	0.540636	0.894287	0.461374	0.608712	0.364489	5.5361	1.37499	7.68819	13.7924	7.28702	1.33705	8.70876	0.813647	1.39802
PREDICTED: Apis mellifera uncharacterized LOC102654669 (LOC102654669), mRNA	GB40275	0	0.65661	0.210218	0.403449	1.02363	0.379438	4.32236	2.25443	0.896391	1.87278	7.58587	1.58327	3.28249	0.444684	4.075
PREDICTED: Apis mellifera excitatory amino acid transporter 3-like (LOC102656460), partial mRNA	GB40276	138.771	0.211288	0.40587	0.584209	0.247043	0.732586	5.5635	0.241815	5.19203	14.4632	32.9539	1.41085	50.7004	0.500825	12.4571
#N/A	GB40277	0	0	0	0	0	0	0	0	0	0	0	0	0	0.507863	0
PREDICTED: Apis mellifera methylmalonate-semialdehyde dehydrogenase [acylating]-like protein (LOC409736), transcript variant X6, mRNA	GB40278	16.3686	5.29227	4.98892	3.52278	7.06636	11.3835	6.12894	7.59916	6.42213	20.5454	14.4363	4.66272	26.9468	3.28547	8.51524
PREDICTED: Apis mellifera uncharacterized LOC100577322 (LOC100577322), transcript variant X2, mRNA	GB40279	13.9163	0.666577	2.24079	0.665556	1.4938	2.88898	12.0669	2.28865	11.6025	8.79309	7.94167	1.90094	13.3293	1.07215	9.56648
PREDICTED: Apis mellifera pyruvate carboxylase, mitochondrial-like (LOC412876), transcript variant X1, mRNA	GB40280	10.0666	11.637	9.00258	7.5738	8.98655	5.27199	15.9259	18.1909	11.9565	14.7259	6.4411	9.76197	18.3106	10.6088	7.5492
PREDICTED: Apis mellifera uncharacterized LOC102655925 (LOC102655925), ncRNA	GB40281	13.1482	5.42836	1.65314	3.41676	4.54091	13.3127	8.71561	3.18209	10.0315	13.5946	1.14721	3.53631	9.26634	1.25532	5.75179
PREDICTED: Apis mellifera uncharacterized LOC409714 (LOC409714), transcript variant X1, mRNA	GB40282	8.71949	2.84425	2.7099	1.42988	2.7387	6.38111	2.50311	4.4302	6.38502	8.24253	3.82194	3.80013	6.08293	2.5649	4.34215
PREDICTED: Apis mellifera bumetanide-sensitive sodium-(potassium)-chloride cotransporter-like (LOC409715), mRNA	GB40283	24.6718	1.97752	1.97848	0.995682	2.20511	2.47597	30.1938	2.95477	13.4421	11.4372	39.9812	2.38417	28.2847	2.00889	5.19886
PREDICTED: Apis mellifera cytochrome P450 6AS10 (CYP6AS10), mRNA	GB40284	5.03883	1.16278	0.491398	0.0857354	0.507565	0.725696	4.59264	2.2091	4.09551	4.11244	3.22409	0.672909	6.04543	0.47249	0.721637
PREDICTED: Apis mellifera cytochrome P450 6AS10 (CYP6AS10), mRNA	GB40285	6.76215	1.07003	0.770798	0.197242	0.834069	0.185503	0	2.26556	1.97206	4.88311	0.927162	4.52517	2.67462	1.59427	1.32815
PREDICTED: Apis mellifera cytochrome P450 6AS16P (CYP6AS16P), mRNA	GB40286	82.0395	0.111843	0.456542	0.137442	0.0871796	0.484734	4.78559	1.63203	5.95475	10.3675	20.8356	1.02688	43.3318	0.416596	27.591
PREDICTED: Apis mellifera cytochrome P450 6AS13 (CYP6AS13), transcript variant 1, mRNA	GB40287	2.289	4.26801	0.75086	0.960699	1.02111	0.51281	3.05992	1.25744	7.18231	25.3107	2.56308	0.376226	2.32377	0.858558	1.44241
PREDICTED: Apis mellifera cytochrome P450 6AS13 (CYP6AS13), transcript variant 1, mRNA	GB40288	1.48552	0.282079	0.33866	0.144434	0.586335	0.0815031	1.23792	1.07611	0.481361	1.20682	0.814721	0.444727	0	0.350232	0.729424
PREDICTED: Apis mellifera carbohydrate kinase domain-containing protein-like (LOC550956), transcript variant X1, mRNA	GB40289	33.4757	4.42107	3.25321	3.11082	3.44614	6.18102	7.0411	2.24428	10.9516	11.5929	7.4144	2.81721	8.91193	3.2356	6.41689
#N/A	GB40290	0.516541	0.114431	0.0824305	0	0	0.0991901	0	0.0982231	0.468657	1.30552	0.495762	0.0318375	0.572058	0.0774975	0.177543
#N/A	GB40291	0	0	0	0	0	0	0	0	0	0	0	0	0	0	0
#N/A	GB40292	0	0.280637	0	0.172435	0.437503	0	1.84739	0.160592	2.29872	1.60086	2.43167	0.31232	5.61178	0.570177	0.870834
#N/A	GB40293	12.8054	0.709207	2.15704	0.435766	3.50115	1.63933	10.8934	9.46952	11.1342	8.76546	8.19352	13.4177	17.7271	6.40406	10.27
#N/A	GB40294	4.62285	1.02412	0.327877	0.209753	0.266093	1.18362	0	1.75812	3.49526	0.97366	0	3.03929	1.70657	1.15596	0
#N/A	GB40295	0	0	0	0	0.584532	0	0	1.28737	0	0	0	0	0	0.507863	0
PREDICTED: Apis mellifera kanadaptin-like (LOC412637), mRNA	GB40296	2.42569	1.97037	1.37634	1.73347	1.71039	2.87243	0.589573	1.48628	2.56764	2.29904	0.776039	0.797387	2.46254	2.42621	2.91812
PREDICTED: Apis mellifera uncharacterized LOC550975 (LOC550975), transcript variant X2, mRNA	GB40297	18.2073	38.6852	33.634	39.7665	29.7256	54.3516	9.65529	20.0389	45.4285	51.7699	23.8294	21.3223	15.5814	40.975	44.3759
PREDICTED: Apis mellifera uncharacterized LOC102655415 (LOC102655415), mRNA	GB40298	0.733525	0	0.234114	0	0.126666	0.281714	0	0.0929892	0.665526	0.463483	0	0.090423	0.812363	0	0
Apis mellifera cuticular protein 5 (CPR5), mRNA	GB40299	21.8477	68.173	119.079	87.8024	39.9352	59.1443	39.2433	145.676	22.7232	6.22891	1.5343	54.4553	24.1958	4.63695	61.9067
PREDICTED: Apis mellifera aldose-1-epimerase (LOC552086), transcript variant X3, mRNA	GB40300	5.16218	2.28719	1.09839	3.16203	2.67424	0.991281	0	0.327206	2.34182	3.26176	0	0.318176	0	8.90664	0
PREDICTED: Apis mellifera aldose-1-epimerase (LOC552086), transcript variant X3, mRNA	GB40301	5.83709	16.568	13.9336	21.8003	13.7964	13.8709	8.51235	9.66586	15.557	10.6036	1.40057	9.84884	3.23223	41.3244	20.3138
PREDICTED: Apis mellifera phosphoglycerate kinase (Pgk), transcript variant 1, mRNA	GB40302	48.8393	52.4784	26.8985	50.3799	27.94	69.4136	15.5044	17.479	34.6657	15.9546	13.3928	21.7476	57.032	54.1832	47.0489
PREDICTED: Apis mellifera uncharacterized LOC412187 (LOC412187), transcript variant X2, mRNA	GB40303	4.8687	1.05461	1.03594	0.986725	0.803368	0.997254	5.99566	2.02993	3.38665	2.9396	3.11523	0.693535	4.67305	1.05511	1.78502
PREDICTED: Apis mellifera ankyrin-1-like (LOC413892), transcript variant X2, mRNA	GB40304	7.74759	14.5583	7.34465	12.2785	7.71661	41.4976	13.9213	15.4516	34.08	7.69273	13.544	7.93041	46.7319	18.9303	50.4063
PREDICTED: Apis mellifera NADH dehydrogenase [ubiquinone] iron-sulfur protein 2, mitochondrial (Ndufs2), transcript variant 1, mRNA	GB40305	15.0634	106.261	62.518	146.824	65.8476	415.493	74.047	125.089	65.8781	13.154	16.8941	81.2235	11.9963	254.592	177.898
#N/A	GB40306	259.226	59.2095	76.2689	121.675	84.742	122.902	95.1605	87.3682	165.854	189.21	101.235	54.5444	144.534	79.1254	189.876
PREDICTED: Apis mellifera RNA polymerase II 15kD subunit (RpII15), transcript variant X2, mRNA	GB40307	1.1699	3.36923	4.10728	4.857	2.32323	9.88473	4.26522	4.52341	6.36869	2.21763	0	1.73059	0.647819	2.28179	7.23804
PREDICTED: Apis mellifera hsp70-binding protein 1-like (LOC409521), mRNA	GB40308	4.21976	7.97712	7.57198	8.80735	5.48935	11.4524	15.5895	19.6145	10.5924	5.33258	2.16001	9.01643	2.80398	14.9411	9.86273
PREDICTED: Apis mellifera peroxisomal biogenesis factor 19-like (LOC100578522), transcript variant X2, mRNA	GB40309	5.73045	5.24721	3.29211	5.61619	2.96862	0.880323	5.0141	3.68069	4.67931	4.34499	2.19997	6.07507	8.03871	10.7182	7.35335
PREDICTED: Apis mellifera uncharacterized LOC411575 (LOC411575), transcript variant X5, mRNA	GB40310	8.85704	8.84267	4.03297	7.34622	5.58757	29.1176	4.99434	7.5902	10.7682	8.28266	4.08036	3.17357	6.80089	8.13248	12.3396
PREDICTED: Apis mellifera uncharacterized LOC100578684 (LOC100578684), mRNA	GB40311	29.1022	182.361	141.832	167.51	120.849	202.78	163.698	251.575	152.14	56.9167	31.9217	142.816	35.2996	310.836	197.2
PREDICTED: Apis mellifera choline/ethanolamine kinase-like (LOC411525), transcript variant X2, mRNA	GB40312	58.4488	8.17233	5.75952	4.17365	3.39191	13.9837	11.8773	10.8714	20.2125	39.0503	10.116	5.079	46.6911	6.46906	17.1257
PREDICTED: Apis mellifera choline/ethanolamine kinase-like (LOC411525), transcript variant X4, mRNA	GB40313	14.2757	8.80992	6.29199	5.13559	6.16285	9.39881	8.9222	6.07552	7.40131	16.1075	1.95734	3.51958	4.51714	5.50749	4.90677
#N/A	GB40314	0	0.230447	0	0.42479	0	0	1.517	0.131871	1.41571	0	0	0.128232	2.30408	0.156069	0
PREDICTED: Apis mellifera roundabout (robo), mRNA	GB40315	51.7486	6.0692	5.28953	4.00541	4.90605	7.01447	29.5945	6.30293	14.2696	23.0808	27.2681	7.62997	49.4443	7.00276	15.3455
PREDICTED: Apis mellifera roundabout (robo), mRNA	GB40316	32.9906	2.75475	2.62785	1.88838	2.57089	4.15843	7.03158	4.34308	8.02033	13.3624	7.79409	3.94168	10.3988	2.95709	5.40802
#N/A	GB40317	0	0	0.556145	0	0	0	0	0	0	0	0	0	0	0	0
PREDICTED: Apis mellifera transcription initiation factor TFIID subunit 3-like (LOC725906), mRNA	GB40318	7.35578	9.31172	9.50258	14.7329	8.70998	18.5644	7.6622	7.32674	11.441	7.30369	2.01711	9.19715	12.8014	15.9234	25.283
PREDICTED: Apis mellifera uncharacterized LOC552129 (LOC552129), mRNA	GB40319	14.1722	1.80067	1.1419	1.17733	1.18765	1.36073	3.34329	3.06482	4.06554	6.71612	6.401	2.22233	6.46282	2.00121	5.65921
PREDICTED: Apis mellifera DnaJ60-like protein (LOC411359), transcript variant X1, mRNA	GB40320	12.1189	3.71733	2.02321	3.47688	1.48099	3.36543	3.26275	3.049	6.34353	6.36154	6.08411	3.35557	8.87877	7.27287	3.46053
#N/A	GB40321	3.04778	2.36315	3.40459	2.90404	2.36833	1.17052	2.22232	6.18189	2.76525	4.81441	0	4.69632	1.68768	1.37179	0
#N/A	GB40322	0	0.626628	0	0	0	0	0	0	0	1.78727	0	0	0	0.848757	0
#N/A	GB40323	0	0	0	0.401528	0	0	0	0	0	0	0	0.727259	0	0.442566	0
#N/A	GB40324	3.48012	0.256988	0.370243	0	0.400634	0.891039	0	0.441176	0.526252	0	0	0	0	0	0
#N/A	GB40325	0	0.333897	0.801742	0.20516	0.780799	0	2.19799	0.573207	0	0.952339	0	1.30057	0	0	1.0361
PREDICTED: Apis mellifera potassium voltage-gated channel subfamily KQT member 1-like (LOC102655649), mRNA	GB40326	24.7587	1.09697	0.632165	0.269611	0.342028	1.52139	1.44424	2.00874	2.69562	5.00606	3.80203	2.31956	14.2582	0.297167	2.04239
PREDICTED: Apis mellifera uncharacterized LOC726884 (LOC726884), mRNA	GB40327	14.2261	2.78078	3.42759	1.9934	4.26288	3.21388	7.93235	2.86429	22.398	15.8627	16.8665	3.76524	9.73107	4.77092	3.7392
#N/A	GB40328	7.94181	0	0	0	0	0	0	0	0	0	0	0	0	0	0
PREDICTED: Apis mellifera uncharacterized LOC102654001 (LOC102654001), mRNA	GB40329	6.45272	1.07212	0.400453	0.14639	0.278566	0.206517	0	0.749846	4.39091	7.13511	1.03219	0.662867	5.35969	0.564733	3.32686
PREDICTED: Apis mellifera uncharacterized LOC102655287 (LOC102655287), partial mRNA	GB40330	1314.75	10.7633	13.862	7.11441	7.62705	21.2039	207.191	45.6338	138.255	716.774	124.349	63.431	327.734	25.9544	68.3162
PREDICTED: Apis mellifera uncharacterized LOC102653914 (LOC102653914), partial mRNA	GB40331	7.88495	4.03943	4.3516	0.134162	2.29767	3.97459	2.87469	5.12284	8.27183	4.67078	1.89194	4.13097	5.45776	7.24583	6.43669
PREDICTED: Apis mellifera cysteine-rich protein 2-binding protein-like (LOC727511), mRNA	GB40332	1.44229	2.1301	1.79015	1.63603	1.49433	1.66175	4.20663	1.03609	3.27146	2.12641	4.61422	2.13352	3.1946	2.52453	1.65246
PREDICTED: Apis mellifera ephrin-B2a-like (LOC408703), transcript variant 1, partial mRNA	GB40333	350.678	36.1299	32.9888	26.4872	37.2278	56.4526	101.055	50.667	102.246	144.181	131.673	32.1843	175.967	39.1708	87.0922
PREDICTED: Apis mellifera uncharacterized LOC100577383 (LOC100577383), ncRNA	GB40334	5.78936	1.28254	1.43714	1.83877	1.66619	1.48229	0	1.46784	3.50179	7.3161	7.40863	3.33044	0	1.73717	1.3266
PREDICTED: Apis mellifera neutral ceramidase (CDase), transcript variant X1, mRNA	GB40335	10.2294	11.2012	6.4675	35.3276	10.0434	10.439	6.81952	2.63061	17.6341	8.49489	3.36613	11.1328	9.71041	22.9332	32.5481
PREDICTED: Apis mellifera neutral ceramidase (CDase), transcript variant X1, mRNA	GB40336	29.6833	28.13	48.8227	323.045	54.3085	311.238	14.7728	28.4611	56.7488	24.7098	23.0627	150.924	13.5669	283.5	311.747
Apis mellifera pyrokinin-like receptor 1 (LOC551571), mRNA	GB40337	10.3878	3.42631	4.12586	4.74471	5.18205	2.65967	11.7824	4.88705	11.9382	13.1273	6.20354	6.40265	10.4817	5.33355	4.60194
PREDICTED: Apis mellifera UPF0488 protein CG14286-like (LOC102656579), mRNA	GB40338	2.57305	1.14003	1.77932	1.66365	0.888635	0	9.38082	2.85413	3.50179	2.84515	1.23477	1.90311	3.56199	1.44765	2.65319
PREDICTED: Apis mellifera iodotyrosine dehalogenase 1-like (LOC413740), transcript variant X2, mRNA	GB40339	0.358174	2.77716	4.64885	2.779	5.44279	3.3014	2.61166	7.21953	1.62485	2.03683	0	4.90096	5.15671	4.72889	4.18574
PREDICTED: Apis mellifera uncharacterized LOC100576863 (LOC100576863), transcript variant X1, mRNA	GB40340	4.84225	3.21816	3.18293	2.9896	2.62795	0.863427	4.03517	7.5197	9.10054	5.46359	1.65981	3.00588	2.87286	5.76003	2.13989
PREDICTED: Apis mellifera uncharacterized LOC413618 (LOC413618), mRNA	GB40341	9.58567	4.64115	4.61538	4.50626	5.23883	7.17309	8.64678	4.58511	10.2661	9.24127	7.2083	3.16729	8.86484	4.10689	6.72536
PREDICTED: Apis mellifera nucleostemin 3 (ns3), mRNA	GB40342	3.20965	5.39208	4.78054	4.87866	4.61871	4.05757	2.92543	7.73087	6.06689	4.81659	2.56711	4.43468	3.4065	6.78181	3.58542
PREDICTED: Apis mellifera uncharacterized LOC413620 (LOC413620), transcript variant X2, mRNA	GB40343	2.29572	1.26203	3.24744	3.06705	2.58412	10.4822	2.47992	2.19889	3.08578	4.83523	0.816063	1.69799	3.48411	1.77318	3.79925
PREDICTED: Apis mellifera phospholipase A2-1 (PLA2-1), mRNA	GB40344	11.2681	3.24513	3.3566	2.91422	2.91867	0	13.9676	8.71358	9.45674	12.8157	8.65182	2.0141	11.8552	2.11321	6.97142
#N/A	GB40345	26.796	2.79352	1.84462	0.858227	1.63312	7.26435	2.29866	5.19533	8.58072	12.9475	18.154	2.72028	34.913	3.3108	1.08356
PREDICTED: Apis mellifera uncharacterized LOC552177 (LOC552177), misc_RNA	GB40346	34.7768	3.85211	6.01222	3.55035	2.62732	2.08691	6.33946	6.613	13.8044	30.9009	14.6028	4.15303	18.0537	3.26101	6.72375
PREDICTED: Apis mellifera uncharacterized LOC102655389 (LOC102655389), mRNA	GB40347	27.4241	7.50485	5.14869	4.39171	7.79985	12.391	7.0576	7.77114	8.78183	20.386	15.4829	4.9715	19.6522	7.01882	6.65372
PREDICTED: Apis mellifera uncharacterized LOC552177 (LOC552177), misc_RNA	GB40348	4.96996	3.09601	3.13631	2.68869	2.33993	3.14861	2.04425	6.6397	4.25873	4.80441	3.91388	2.83812	4.6103	3.9322	4.29254
PREDICTED: Apis mellifera uncharacterized LOC726673 (LOC726673), partial mRNA	GB40349	32.8949	15.0499	10.0804	15.2337	11.4224	0.274641	11.9928	29.4627	65.3682	24.3997	5.49073	26.6662	6.33572	45.4904	12.2897
PREDICTED: Apis mellifera DENN domain-containing protein 5B-like (LOC412128), transcript variant X5, mRNA	GB40350	7.89523	6.00245	2.23352	1.35558	2.68024	4.58276	9.42036	5.22051	19.2108	12.7551	12.7442	2.47739	13.5131	4.71122	6.53759
PREDICTED: Apis mellifera uncharacterized LOC102655053 (LOC102655053), ncRNA	GB40351	516.94	41.372	43.1161	24.3724	39.3967	68.7658	209.173	93.1125	441.944	328.457	345.546	57.7908	2836.91	46.0723	1404.24
PREDICTED: Apis mellifera uncharacterized LOC102654732 (LOC102654732), ncRNA	GB40352	1.16331	0	0	0.158349	0	0.446774	0	0.147473	0.527734	0	0	0.143403	0	0.523599	0.799695
PREDICTED: Apis mellifera uncharacterized LOC102654896 (LOC102654896), transcript variant X1, ncRNA	GB40353	13.9991	0	1.117	0	0	1.34411	0	0	0	6.63409	0	0	0	0.525078	0
PREDICTED: Apis mellifera uncharacterized LOC102654896 (LOC102654896), transcript variant X1, ncRNA	GB40354	1.84364	7.76011	3.72667	3.26241	7.64067	2.12417	10.7544	4.44065	12.5455	20.9685	0	4.99991	0	5.25547	3.80212
PREDICTED: Apis mellifera coiled-coil domain-containing protein 94-like (LOC413184), transcript variant X2, mRNA	GB40355	3.72354	2.51216	1.17041	1.95827	1.51978	1.43004	2.96188	2.05979	4.91399	3.52912	2.92398	1.35616	2.06187	2.28538	1.51254
PREDICTED: Apis mellifera spondin-1-like (LOC413185), transcript variant X3, mRNA	GB40356	122.923	1.97866	2.06149	1.29819	1.9083	3.60466	138.42	7.638	141.059	60.5483	362.363	12.3725	167.486	4.76959	38.5044
PREDICTED: Apis mellifera UPF0518 protein AGAP011705-like (LOC412284), transcript variant X2, mRNA	GB40357	8.736	1.80965	1.54498	1.43623	1.41059	3.18081	2.64725	2.4882	4.47777	5.08978	13.5024	1.79018	14.8265	2.41709	8.89112
PREDICTED: Apis mellifera RILP-like protein homolog (LOC410142), transcript variant X2, mRNA	GB40358	14.9312	2.25895	2.4796	1.98285	2.01236	1.25877	9.5595	3.23166	2.31291	10.1247	3.49525	0.942743	12.9061	2.73189	8.51175
PREDICTED: Apis mellifera ER degradation-enhancing alpha-mannosidase-like 1 (Edem1), mRNA	GB40359	4.00544	0.764947	0.42613	0.263209	0.143103	0.901767	0.604263	0.822939	0.563917	2.09451	0	0.74915	1.52963	1.01539	0.759577
PREDICTED: Apis mellifera eukaryotic translation initiation factor 2 subunit 1-like (LOC726500), mRNA	GB40360	1.84914	10.0363	7.54116	11.5784	9.73901	7.69352	13.0337	8.51712	9.5071	2.72625	2.36634	2.81135	3.75445	10.3111	9.74554
PREDICTED: Apis mellifera sister chromatid cohesion protein PDS5 homolog B-A-like (LOC551462), transcript variant X4, mRNA	GB40361	21.1569	1.03414	0.632799	0.727654	0.533059	0.809651	1.97639	1.75623	3.82547	8.23023	3.32409	1.07664	8.67191	1.24257	3.20899
PREDICTED: Apis mellifera flap endonuclease 1 (LOC412308), mRNA	GB40362	6.10006	0.945958	1.10325	0.747304	1.05337	0.58569	6.67188	1.08263	3.32075	1.54175	2.92734	1.12795	4.3912	0.823683	3.56437
PREDICTED: Apis mellifera fritz (frtz), transcript variant X1, mRNA	GB40363	4.26511	4.64217	3.89639	5.07364	3.61848	0.997067	4.73253	7.27581	3.32293	3.63232	1.7798	4.13757	4.2101	5.77303	3.69684
PREDICTED: Apis mellifera conserved oligomeric Golgi complex subunit 8 (LOC551090), mRNA	GB40364	8.24545	1.9821	1.81042	1.83877	1.33295	0.606391	6.39601	7.02783	2.46717	3.43635	0.336756	3.58995	4.66297	4.02709	3.97979
PREDICTED: Apis mellifera ATP-dependent RNA helicase DDX24-like (LOC726586), mRNA	GB40365	14.4292	1.72688	1.55274	1.33198	1.57519	1.14654	17.8981	5.17222	37.7701	8.27885	15.5998	2.98498	13.2249	3.1104	4.78854
PREDICTED: Apis mellifera uncharacterized LOC102656367 (LOC102656367), transcript variant X2, ncRNA	GB40366	162.588	23.7724	44.6274	10.6231	20.7762	13.7374	75.8738	182.617	76.7085	90.4048	93.6288	335.112	93.6328	106.843	93.8855
PREDICTED: Apis mellifera uncharacterized LOC100578698 (LOC100578698), transcript variant X1, ncRNA	GB40367	15.6826	3.47421	3.89302	2.84627	4.51348	8.03063	7.6234	2.65078	0	23.1214	20.0689	1.28881	11.5787	7.84294	3.59357
PREDICTED: Apis mellifera uncharacterized LOC100578698 (LOC100578698), transcript variant X2, ncRNA	GB40368	0	0.720375	0.345948	3.98366	1.12304	1.24886	4.74211	5.77119	0	6.16396	24.9677	1.20255	14.405	0.975736	4.47074
PREDICTED: Apis mellifera uncharacterized LOC100578607 (LOC100578607), transcript variant X3, ncRNA	GB40369	308.766	16.2455	10.4706	12.8714	14.9957	22.2343	42.2137	16.8801	71.7867	92.6706	103.721	12.1323	143.192	13.3183	54.3905
PREDICTED: Apis mellifera uncharacterized LOC100578607 (LOC100578607), transcript variant X3, ncRNA	GB40370	13.9991	14.7311	5.58502	3.81111	10.8782	0	15.3114	5.32403	19.0521	17.6909	13.436	5.60852	3.87593	11.5517	7.21759
PREDICTED: Apis mellifera uncharacterized LOC102655855 (LOC102655855), transcript variant X2, ncRNA	GB40372	6.97003	0.772048	0.741527	0.237189	1.20359	0.669219	2.54113	9.05683	3.95244	5.50508	0	4.72565	0	1.56859	2.39571
PREDICTED: Apis mellifera uncharacterized protein C20orf112-like (LOC408958), transcript variant X3, mRNA	GB40373	0	0	0.323055	0.413337	0.26218	0	0	0.192474	0	1.91868	0	0	0	0.227791	0
PREDICTED: Apis mellifera uncharacterized LOC100578376 (LOC100578376), transcript variant X7, misc_RNA	GB40375	30.1312	12.9575	12.6338	12.3043	15.6093	31.3126	28.4323	11.9086	38.5948	24.6382	13.609	11.7985	29.4438	13.296	53.6105
#N/A	GB40376	0	0	0	0	0	1.21072	0	0	0	1.99192	0	0	0	0.472971	0
PREDICTED: Apis mellifera uncharacterized LOC551717 (LOC551717), mRNA	GB40377	25.9043	5.62831	5.35281	9.96796	3.0108	4.01774	18.1619	20.0191	21.695	24.5517	22.9498	24.8093	24.8265	7.17501	10.9584
PREDICTED: Apis mellifera uncharacterized LOC725331 (LOC725331), transcript variant X2, mRNA	GB40378	0.610909	7.84953	4.15957	4.49046	13.503	19.9429	4.4545	0.542116	2.49425	1.93004	8.20867	1.43085	3.38284	3.48292	13.4387
PREDICTED: Apis mellifera uncharacterized LOC102655052 (LOC102655052), ncRNA	GB40379	0	0.737804	1.41727	4.53338	4.60083	0	0	2.111	15.1085	23.148	0	0.41055	0	0.999343	0
PREDICTED: Apis mellifera protein I'm not dead yet-like (LOC725438), mRNA	GB40381	4.0961	2.91672	2.5524	2.84753	2.42509	3.76427	0.426673	4.15411	2.5882	2.77302	0.561618	2.4886	0.81006	2.52402	2.31297
PREDICTED: Apis mellifera gustatory receptor 3 (Gr3), mRNA	GB40382	3.55767	10.435	9.44718	13.0559	10.3947	14.5379	13.4894	10.5536	10.3292	5.21522	3.8243	6.01706	3.46724	12.1912	11.9348
PREDICTED: Apis mellifera uncharacterized LOC410018 (LOC410018), transcript variant X8, misc_RNA	GB40383	0	0.672703	0.969165	2.48002	1.57308	0	0	1.15484	0	0	0	1.87162	0	1.36675	2.08744
PREDICTED: Apis mellifera uncharacterized LOC410018 (LOC410018), transcript variant X8, misc_RNA	GB40384	0	1.44075	1.72974	1.77052	0	0	0	0	0	4.10931	0	0.400852	0	3.90294	0
PREDICTED: Apis mellifera uncharacterized LOC410018 (LOC410018), transcript variant X2, mRNA	GB40385	5.28385	5.60631	8.49123	5.67817	5.76266	19.118	3.24444	6.02852	6.05562	6.50156	4.27056	1.91977	6.15973	3.83855	5.92636
PREDICTED: Apis mellifera uncharacterized LOC410018 (LOC410018), transcript variant X6, mRNA	GB40386	15.4819	5.53719	11.1922	5.91591	9.92068	18.3391	10.0647	12.0596	7.36182	7.77873	6.80296	4.66773	9.50251	6.88436	6.79597
PREDICTED: Apis mellifera protein Dr1 (NC2beta), transcript variant 2, mRNA	GB40387	24.8861	15.4963	10.5187	15.1979	9.0593	14.7239	19.6172	6.99176	36.0045	127.496	27.1127	5.3893	24.5812	11.302	22.6559
PREDICTED: Apis mellifera exo84 protein (exo84), mRNA	GB40388	1.30596	16.7481	3.62784	2.5875	3.15721	2.78645	6.13676	4.80116	4.60794	5.50122	1.11416	2.18229	0.482108	5.83453	3.09229
Apis mellifera profilin (PRF), transcript variant 1, mRNA	GB40389	48.3542	184.987	151.953	197.208	219.237	236.328	139.421	176.584	322.691	216.662	30.1541	68.6541	23.6495	47.542	115.075
PREDICTED: Apis mellifera sodium/hydrogen exchanger-like domain-containing protein 1-like (LOC725900), transcript variant X1, mRNA	GB40390	9.00567	0.513015	0.574856	0.315218	0.355454	0.296458	2.62663	0.587135	2.33453	4.0645	9.87817	0.348903	5.98415	0.540454	1.94568
PREDICTED: Apis mellifera uncharacterized LOC100577582 (LOC100577582), transcript variant X1, mRNA	GB40391	358.713	4.51455	3.70918	3.14156	2.28948	6.1292	210.178	6.50521	74.4036	108.286	578.283	10.9262	328.473	3.60999	2.70052
PREDICTED: Apis mellifera sodium-independent sulfate anion transporter-like (LOC552279), transcript variant X1, mRNA	GB40392	2.81294	0.856845	0.33667	0.550412	0.364306	0.540162	2.56385	1.13665	4.54606	3.9991	4.04967	0.411773	8.95639	0.369276	1.9337
PREDICTED: Apis mellifera uncharacterized LOC102656154 (LOC102656154), transcript variant X1, mRNA	GB40393	10.8646	0.784853	0.841772	0.562621	0.93806	0.997801	4.13325	1.82644	2.89296	5.52177	3.17361	1.03359	9.15505	0.956763	2.92254
PREDICTED: Apis mellifera uncharacterized LOC102656242 (LOC102656242), ncRNA	GB40394	0	1.02221	0.490899	0	1.19519	0	0	0.292474	3.13987	1.45777	0	0	2.55508	0.346141	3.17198
PREDICTED: Apis mellifera baiser (bai), mRNA	GB40395	3.41866	14.3896	20.4402	17.497	20.4257	8.6655	11.9652	19.5023	8.37472	8.20841	1.31246	13.2327	3.02887	18.9776	18.8008
#N/A	GB40396	4.81603	1.467	1.02473	1.55694	1.1435	0.92481	9.65705	4.65529	3.55028	1.9019	1.15557	1.78104	0.666706	1.62575	1.24151
PREDICTED: Apis mellifera tRNA (adenine(58)-N(1))-methyltransferase non-catalytic subunit TRM6-like (LOC102655836), mRNA	GB40397	0.292475	2.85089	1.15128	0.955476	0.404039	1.23559	0.426522	3.29986	2.38826	2.03283	1.12284	0.360539	1.61955	2.0185	2.01057
PREDICTED: Apis mellifera beta-1,3-galactosyltransferase 6-like (LOC102655877), mRNA	GB40398	3.33942	2.01388	2.07243	2.09602	1.60182	1.42502	1.08221	2.77522	1.93574	1.99281	0.35612	1.60089	2.67102	2.97827	2.04055
PREDICTED: Apis mellifera YKT6 v-SNARE protein (Ykt6), transcript variant X1, mRNA	GB40399	0.304778	0.877741	1.00517	1.16161	0.947331	1.28757	5.77803	3.01367	0.967838	1.54061	0.585036	1.87853	0	2.14914	1.4666
PREDICTED: Apis mellifera uncharacterized LOC552576 (LOC552576), mRNA	GB40400	6.32973	0.898876	0.509372	0.629631	0.294276	1.49598	1.6568	2.25295	1.76706	3.02525	1.71349	3.40121	2.33668	1.21751	1.56199
PREDICTED: Apis mellifera uncharacterized LOC552576 (LOC552576), mRNA	GB40401	3.38504	0.712404	0.34212	0.345577	0.379946	0.32501	1.48094	0.665139	0.691029	0.641658	0.97466	0.292096	2.81164	0.685615	0.930793
#N/A	GB40403	90.6337	6.28541	6.12078	7.83132	5.17155	2.72413	49.4212	13.6877	47.909	54.2797	90.7699	14.1843	90.7738	26.9594	20.5876
PREDICTED: Apis mellifera proximal to raf (ptr), transcript variant X6, mRNA	GB40405	4.25614	4.00008	3.80765	3.95007	3.49661	1.21356	7.14723	10.1779	4.30041	7.98633	1.23786	6.28005	2.7853	5.3987	4.25572
#N/A	GB40406	5.71308	1.26564	0.520974	0.666568	0.845608	1.88069	1.19021	1.75889	2.59174	2.06277	4.69994	3.62192	1.80775	0.734695	0.561051
[truncated: 14,924 more rows]

## Sheet: stat test DWV
			ranks			ties
[truncated: 6 more rows]
